# Supplementary material for: Characterization of piRNAs across postnatal development in mouse brain
Source: PubMed Central journal article supplement (PMC4844963; doi:10.1038/srep25039), 2016-04-26
Supplement: srep25039-s1.pdf [file srep25039-s1.pdf]

## **Supplemental information for “Characterization of piRNAs across postnatal development in mouse brain”.**

Yanal Ghosheh<sup>a,b</sup>, Loqmane Seridi<sup>a,b</sup>, Taewoo Ryu<sup>a,b</sup>, Hazuki Takahashi<sup>c</sup>, Valerio Orlando<sup>b</sup>, Piero Carninci<sup>c</sup> and Timothy Ravasi<sup>a,b,d,\*</sup>

<sup>a</sup> Division of Applied Mathematics and Computer Sciences, King Abdullah University of Science and Technology, Thuwal 23955-6900, Kingdom of Saudi Arabia.

<sup>b</sup> KAUST Environmental Epigenetic Program (KEEP), Division of Biological and Environmental Sciences & Engineering, King Abdullah University of Science and Technology, Thuwal 23955-6900, Kingdom of Saudi Arabia.

<sup>c</sup> RIKEN Center for Life Science Technologies, Division of Genomic Technologies, 1-7-22 Suehiro-cho, Tsurumi-ku, Yokohama, Kanagawa 230-0045, Japan.

<sup>d</sup> Department of Medicine, Division of Genetic, University of California, San Diego. 9500 Gilman Drive La Jolla, California 92093-0688, USA.

\*Corresponding Author: Timothy Ravasi ([timothy.ravasi@kaust.edu.sa](mailto:timothy.ravasi@kaust.edu.sa)). King Abdullah University of Science and Technology. Thuwal, Kingdom of Saudi Arabia.

# Supplemental Figures

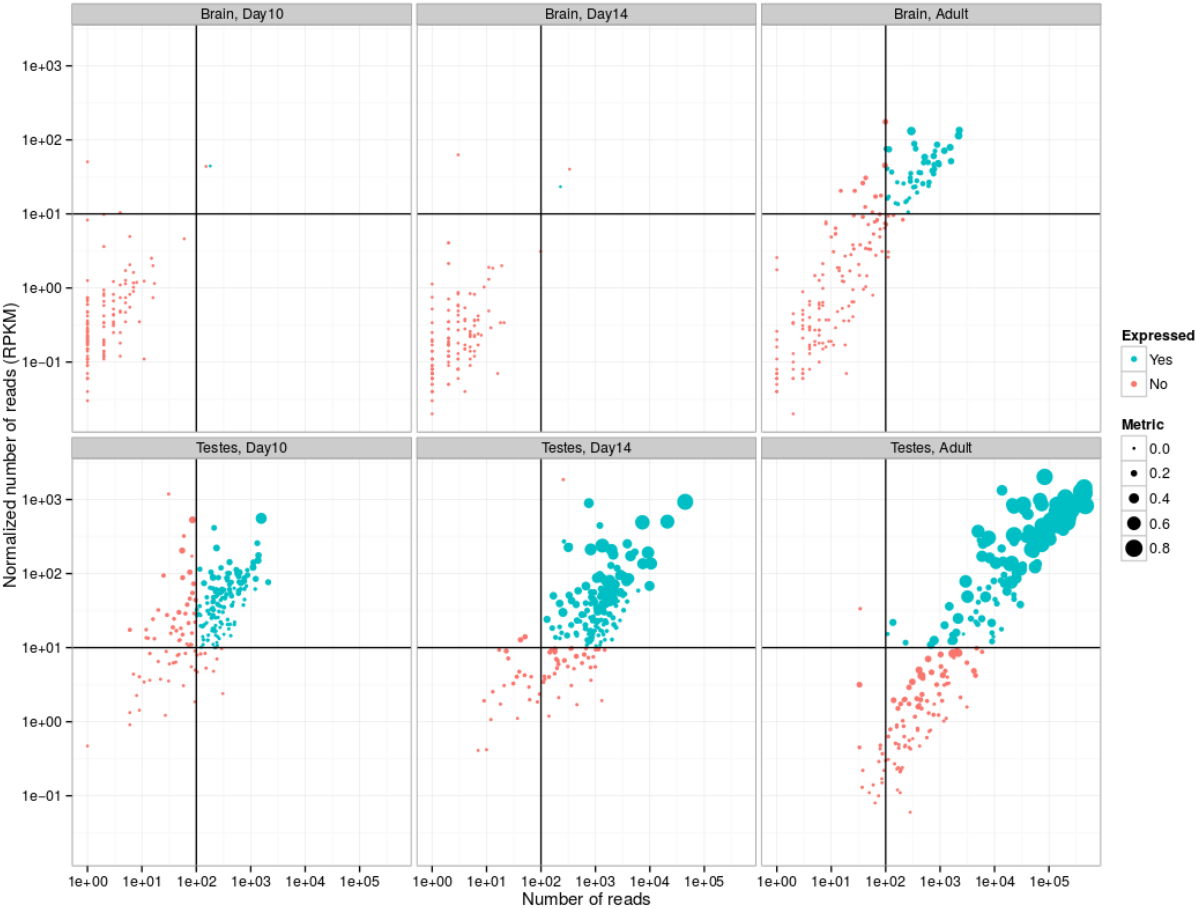

Figure S1. Filtering non-expressed piRNA clusters. scatter point shows expressed piRNA clusters (blue): pass threshold of 10 rpkM (horizontal); 100 reads (vertical); have more uniform-like coverage of reads (metric; see methods).

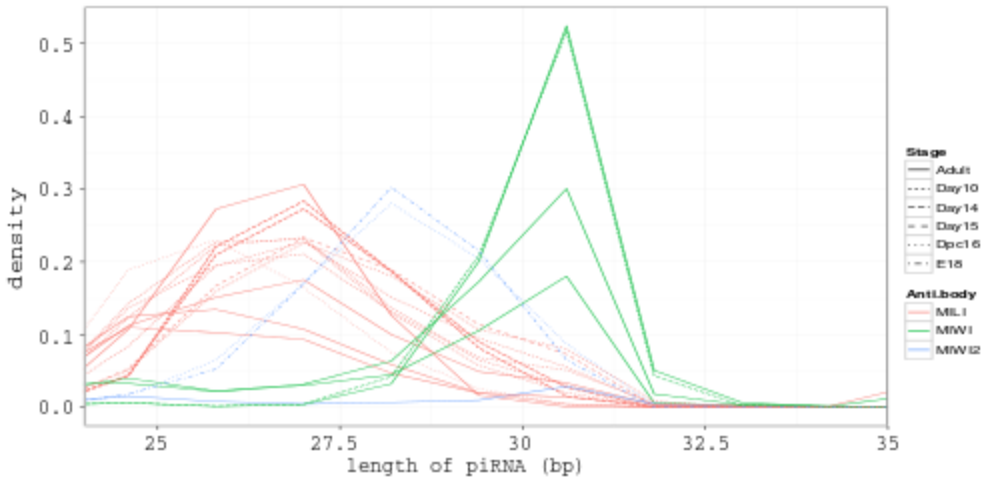

Figure S2. Piwi-like genes bind piRNAs of specific sequence lengths. lineplot shows sequence length distribution of piRNAs obtained from publicly available PIWI-like proteins IP datasets. piRNAs of lengths 26~27bp, 28~29bp and 29~31bp associate to MILI, MIWI2 and to MIWI. These data sets were obtained from the following NCBI GEO series: GSE7414, GSE12757, GSE16023, GSE18825, GSE19172, GSE26251, GSE27623, GSE32184, GSE39203.

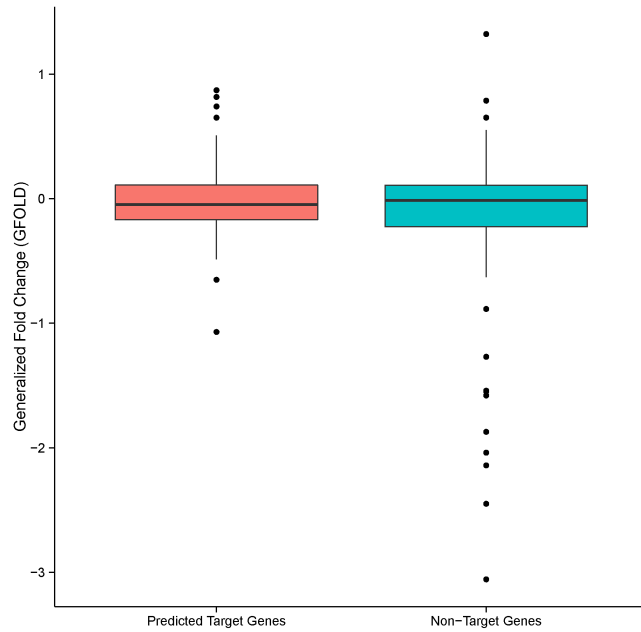

Figure S3: miRanda-predicted target genes do not exhibit more down regulation than non-target genes (p-value 0. 5122). The similarity between the two distributions suggests that piRNAs in adult brain may not be implicated in massive mRNA deadenylation.

## Supplementary Tables

| Motif | Over-representation        | Over-represented Motif E-value | TF Match P-value | TF    |
|-------|----------------------------|--------------------------------|------------------|-------|
|       | BT Clusters' Promoters     | 4.9e-003                       | 0.00497752       | Eomes |
|       | Non BT Clusters' Promoters | 2.0e-002                       | 0.00858316       | Meis1 |
|       | Non BT Clusters' Promoters | 4.5e-002                       | 0.014478         | Sox4  |
|       | BT Clusters' Promoters     | 3.7e-008                       | 0.00616759       | Zic1  |
|       |                            | 1.4e-004                       | 0.0152929        |       |
|       | BT Clusters' Promoters     | 3.7e-008                       | 0.00909189       | Zic2  |

Supplementary Table S1: Discriminatory motifs that distinguish between BT clusters' promoters and non-BT clusters' promoters. These motifs were compared against

JASPAR vertebrate and UniPROBE mouse to find their associated candidate TFs.  
These TFs may regulate the transcription of BT piRNA clusters.
