# Supplementary material for: Characterization of piRNAs across postnatal development in mouse brain
Source: PubMed Central journal article supplement (PMC4844963; doi:10.1038/srep25039), 2016-04-26
Supplement: srep25039-s2.pdf [file srep25039-s2.pdf]

| Gene     | Day10_Expression | Day14_Expression | Adult_Expression | Average_miRanda_Score |
|----------|------------------|------------------|------------------|-----------------------|
| Kcnq1ot1 | 1.64268          | 0.761137         | 1.91589          | 811.429               |
| Xist     | 0                | 2.12644          | 0                | 1235.87               |
| Slc8a1   | 11.9343          | 5.67051          | 6.29308          | 525.519               |
| Aak1     | 6.55296          | 4.30521          | 3.83179          | 473.717               |
| Strbp    | 44.4389          | 64.2434          | 45.5366          | 510.174               |
| Plagl1   | 0.923247         | 0.761137         | 0.615324         | 1490.79               |
| Fut9     | 11.423           | 9.46325          | 10.3105          | 465.385               |
| Gucy1a2  | 7.80295          | 5.44691          | 7.02143          | 539.848               |
| Lpp      | 3.15698          | 2.50701          | 4.35583          | 478.719               |
| Synj2bp  | 21.9323          | 20.8676          | 13.8678          | 530.633               |
| Gskip    | 1.5143           | 1.08938          | 1.71311          | 945.897               |
| Ino80d   | 3.61965          | 2.12644          | 6.14615          | 476.731               |
| Fzd3     | 9.15611          | 3.57917          | 5.81987          | 458.76                |
| Ubn2     | 2.76974          | 0                | 1.57327          | 562.542               |
| Tmem167  | 8.97431          | 6.74647          | 5.74375          | 415.875               |
| Scai     | 8.40663          | 4.89934          | 4.19134          | 574.304               |
| Gm16712  | 0.591053         | 0                | 0.615324         | 907.818               |
| Fam163b  | 1.18211          | 0                | 0.615324         | 1098.09               |
| Bicd1    | 16.4015          | 14.6784          | 11.9963          | 737.409               |
| Homer2   | 5.06062          | 2.88758          | 1.57327          | 464.857               |
| Nufip2   | 37.9943          | 24.7294          | 21.8818          | 511.55                |
| Nfia     | 33.7869          | 10.5856          | 6.99141          | 1002.8                |
| Hook3    | 22.389           | 20.1806          | 19.1753          | 496.35                |
| Camk4    | 26.2621          | 14.5017          | 10.3891          | 480.85                |
| Zyg11b   | 9.29864          | 2.81803          | 2.80392          | 544.368               |
| Pou2f1   | 4.28404          | 2.50701          | 2.87384          | 450.105               |
| Ntrk2    | 2.78026          | 2.55933          | 3.97891          | 603.316               |
| Nav1     | 11.6106          | 3.59639          | 1.23065          | 986                   |
| Kcna2    | 1.58764          | 1.08938          | 4.01321          | 475.579               |
| Gm16386  | 7.85108          | 4.15543          | 2.25852          | 1014.11               |
| Zfp871   | 20.3847          | 14.8321          | 13.7222          | 560.444               |
| Prlr     | 1.77316          | 0                | 1.57327          | 499.667               |
| Peg10    | 2.06356          | 1.01984          | 0                | 722                   |
| Zfp781   | 18.2344          | 10.8602          | 12.124           | 943.059               |
| Zfp26    | 6.16217          | 3.82718          | 0.957947         | 846.824               |
| Tet1     | 0.923247         | 0.708814         | 1.84597          | 434.882               |
| Map3k2   | 1.419            | 0                | 0.615324         | 435.824               |
| Kctd14   | 0                | 0                | 0.957947         | 1954.41               |
| Clmn     | 0                | 0.380568         | 1.30057          | 448.118               |
| Usp15    | 55.4087          | 47.0682          | 48.083           | 450.125               |
| Tyw3     | 5.03563          | 4.94863          | 7.03834          | 670.5                 |
| Tnrc6b   | 107.529          | 67.5604          | 66.5085          | 525.875               |
| Steap2   | 3.0286           | 1.46995          | 1.84597          | 460.062               |
| Slc1a2   | 28.0969          | 36.0927          | 29.33            | 459.625               |
| Rc3h1    | 5.60504          | 2.02899          | 3.14654          | 486.812               |
| Gm5089   | 7.72962          | 2.55933          | 3.54501          | 1068.31               |

|               |          |          |          |         |
|---------------|----------|----------|----------|---------|
| Enah          | 4.04979  | 3.1986   | 3.68882  | 476.625 |
| C1qtnf1       | 0.332194 | 1.08938  | 0.685246 | 1001    |
| Slc4a8        | 18.0505  | 17.322   | 17.481   | 533.6   |
| Itga4         | 2.10535  | 1.46995  | 0        | 495.333 |
| Fam63b        | 0.332194 | 0.380568 | 0.615324 | 384.333 |
| Bmpr2         | 18.7588  | 11.3699  | 19.7716  | 560.267 |
| A230073K19Rik | 162.163  | 109.434  | 154.728  | 628.067 |
| Xpo7          | 2.76974  | 1.7982   | 1.55191  | 433.929 |
| Tmem170b      | 0.332194 | 0.708814 | 0.957947 | 390.286 |
| Tead1         | 0.923247 | 0.380568 | 1.10507  | 389     |
| Sox11         | 1.93035  | 1.08938  | 0.342623 | 596.857 |
| Pgap1         | 16.4027  | 8.99475  | 4.25161  | 423.071 |
| Lrrc58        | 0.923247 | 2.12644  | 0.615324 | 431.643 |
| Kcnb1         | 1.77316  | 0.380568 | 4.51703  | 475.571 |
| Csrnp3        | 14.8219  | 6.03385  | 4.69845  | 527.429 |
| Celf2         | 292.168  | 148.584  | 151.231  | 491.429 |
| Zfp935        | 12.1827  | 7.64667  | 9.03828  | 687.308 |
| Trub2         | 6.45828  | 5.32504  | 4.32154  | 1581.31 |
| Rora          | 2.82111  | 1.46995  | 2.94376  | 414.231 |
| Mesdc2        | 22.3657  | 10.9542  | 14.3007  | 512.154 |
| Gm14436       | 10.9658  | 5.49923  | 6.16022  | 683.077 |
| Dnajc28       | 2.51088  | 3.97696  | 5.31378  | 673.154 |
| Dcx           | 67.561   | 26.2156  | 8.47283  | 429.462 |
| Clock         | 23.1497  | 14.1818  | 13.2742  | 425.462 |
| Zbtb44        | 1.18211  | 0        | 1.23065  | 579     |
| Tug1          | 46.585   | 26.2756  | 19.886   | 371.417 |
| Ttc14         | 2.76974  | 0.708814 | 1.30057  | 486.167 |
| Trove2        | 5.70095  | 1.46995  | 2.09731  | 424.583 |
| Tmod2         | 14.8838  | 11.6716  | 16.9444  | 501.5   |
| Tbrg3         | 1.84649  | 2.12644  | 0.957947 | 407.917 |
| Rufy2         | 11.2163  | 8.32119  | 9.72793  | 364.083 |
| N4bp2l2       | 79.4543  | 33.3626  | 50.7375  | 583.833 |
| Itsn1         | 4.35799  | 1.14171  | 3.3462   | 493.083 |
| Hnrnpd        | 18.7452  | 8.33449  | 10.568   | 502.083 |
| Hif3a         | 0        | 0        | 0.866667 | 617.083 |
| Gpc6          | 5.47667  | 3.21582  | 1.57327  | 676.75  |
| Gm19461       | 0        | 0        | 0.615324 | 945     |
| Fam210a       | 6.01603  | 4.35753  | 5.71149  | 410     |
| Fam199x       | 0.332194 | 0.380568 | 2.43994  | 471.583 |
| Dnajc27       | 3.61965  | 4.58832  | 7.54528  | 515.583 |
| Cadm2         | 5.14447  | 3.26815  | 0.615324 | 514.333 |
| Zfp148        | 17.9177  | 5.34226  | 7.87948  | 481     |
| Ubxn7         | 26.1734  | 18.6412  | 14.2722  | 461.455 |
| Trdmt1        | 3.15698  | 2.10922  | 1.02787  | 724.636 |
| Slc5a3        | 2.89812  | 0.380568 | 4.28956  | 549.364 |
| Slc4a5        | 0.591053 | 0        | 0.957947 | 595     |
| Slc24a2       | 18.8156  | 26.4732  | 22.5604  | 384.636 |

|               |          |          |          |         |
|---------------|----------|----------|----------|---------|
| Sh3gl2        | 6.96901  | 5.01402  | 6.2018   | 889.364 |
| Polr3e        | 1.64268  | 1.70074  | 0.615324 | 2744.18 |
| Pappa         | 6.42198  | 4.62714  | 4.38194  | 535.091 |
| Kantr         | 24.7121  | 10.7968  | 7.03671  | 719.455 |
| Fgf9          | 7.49607  | 2.17876  | 4.35583  | 1291.27 |
| Cdr1          | 27.9615  | 39.4039  | 57.2086  | 1001.64 |
| Ankrd45       | 10.3003  | 8.27641  | 15.1691  | 670.182 |
| Zdhhc21       | 4.53863  | 4.26008  | 1.57327  | 488.3   |
| Wdr37         | 42.8256  | 19.6107  | 23.6866  | 735.1   |
| Ttbk2         | 0.591053 | 0.761137 | 0.615324 | 390.4   |
| Suclg2        | 0.591053 | 0.380568 | 1.10507  | 772.1   |
| Smad2         | 12.7683  | 4.536    | 3.89925  | 420.7   |
| Shisa7        | 0.923247 | 1.7982   | 0.957947 | 379     |
| Rnf150        | 3.0286   | 2.83525  | 0.957947 | 390.4   |
| Rgs17         | 7.59222  | 5.24481  | 4.09586  | 519.9   |
| Rfng          | 0.332194 | 0        | 0.957947 | 850.5   |
| Psd3          | 92.1432  | 75.7344  | 87.5378  | 476.4   |
| Prex2         | 5.1992   | 4.61623  | 6.96425  | 411.4   |
| Pank3         | 9.68527  | 9.06429  | 7.80956  | 489.6   |
| Mid1          | 1.05163  | 0.380568 | 1.23065  | 855.2   |
| Map3k9        | 0        | 0.708814 | 0.957947 | 388.7   |
| Malat1        | 12896.7  | 23052.8  | 16667.6  | 410.5   |
| Kdm7a         | 0.591053 | 0.761137 | 0        | 521.1   |
| Hecw2         | 0        | 0        | 0.615324 | 451.6   |
| Gabpa         | 13.2751  | 6.4358   | 5.4609   | 709.6   |
| Fmn1          | 5.4024   | 4.92969  | 6.56995  | 451.1   |
| Fam160a2      | 6.58987  | 2.12644  | 3.7956   | 439.1   |
| Edaradd       | 0.591053 | 0.708814 | 0        | 484.8   |
| Col19a1       | 2.98681  | 1.46995  | 3.39788  | 539.8   |
| 1700025G04Rik | 3.95185  | 0.708814 | 3.63629  | 344.2   |
| Zkscan8       | 3.39388  | 0.380568 | 0.615324 | 429.556 |
| Zfp97         | 5.06807  | 5.17476  | 4.78973  | 563.222 |
| Zfp600        | 0.591053 | 0        | 0.957947 | 607.778 |
| Tsc22d2       | 0        | 0        | 1.30057  | 541.444 |
| Thsd7a        | 2.10535  | 0.708814 | 1.91589  | 431.111 |
| Tanc2         | 6.46273  | 6.38652  | 6.02038  | 475.222 |
| Stxbp5l       | 9.37572  | 6.54022  | 10.2346  | 518.333 |
| Stx8          | 8.17194  | 10.1328  | 12.0879  | 2425.44 |
| Ssbp2         | 31.0127  | 23.8657  | 25.6962  | 414.444 |
| Slc7a11       | 17.3313  | 11.894   | 13.5003  | 463.111 |
| Setbp1        | 0.591053 | 1.08938  | 0.685246 | 535.111 |
| Serbp1        | 77.614   | 45.8874  | 44.5319  | 458     |
| Rgs8          | 6.90976  | 8.29819  | 8.22206  | 451.778 |
| Rfesd         | 2.10535  | 2.88758  | 1.57327  | 475.778 |
| Ptbp3         | 1.5143   | 0.708814 | 0.615324 | 560.667 |
| Myo5a         | 0.996582 | 1.41763  | 2.40564  | 378.889 |
| Msi2          | 5.68141  | 3.11837  | 4.30727  | 907.444 |

|               |          |          |          |         |
|---------------|----------|----------|----------|---------|
| Lnp           | 20.0556  | 5.27687  | 11.1676  | 503.778 |
| Kalrn         | 20.151   | 11.953   | 17.4876  | 343     |
| Gm14440       | 25.017   | 16.6799  | 19.6952  | 774.889 |
| Fgd4          | 46.8963  | 23.1599  | 20.777   | 378.222 |
| Dnal1         | 22.1745  | 17.2689  | 18.5021  | 415.222 |
| Cmah          | 0        | 0.708814 | 0        | 424.778 |
| Cbx5          | 105.613  | 88.9472  | 71.6187  | 380.222 |
| Braf          | 2.43755  | 2.12644  | 3.48916  | 448.333 |
| Acvr1c        | 0.332194 | 0        | 0.615324 | 430.889 |
| A830018L16Rik | 13.7676  | 9.79752  | 10.5622  | 430.333 |
| 5930403L14Rik | 0.591053 | 0        | 0.615324 | 517.667 |
| 2610507I01Rik | 0.591053 | 1.85052  | 4.35583  | 867.333 |
| Zbtb41        | 4.60782  | 3.36941  | 1.48199  | 465.5   |
| Vldlr         | 2.23373  | 1.7982   | 0.615324 | 403.125 |
| Trim66        | 2.43755  | 3.21582  | 3.05526  | 386.25  |
| Tnfrsf22      | 1.5143   | 0.761137 | 0        | 791.25  |
| Tmppe         | 1.71601  | 2.17876  | 0.342623 | 410.125 |
| Tfcp2l1       | 0.591053 | 0.708814 | 0.615324 | 482.5   |
| St8sia1       | 2.36421  | 1.46995  | 2.18859  | 634.375 |
| Ssr1          | 57.7321  | 40.3475  | 37.2979  | 382     |
| Slc30a7       | 4.99748  | 5.85617  | 5.81514  | 402.5   |
| Sbno1         | 2.17869  | 3.05951  | 2.18859  | 478.625 |
| Rab3c         | 49.5344  | 46.6539  | 41.5709  | 407     |
| Qk            | 14.2893  | 11.5614  | 13.4139  | 403.25  |
| Prkg1         | 8.58498  | 4.20775  | 5.20956  | 601     |
| Ppp1r9a       | 4.85313  | 3.97696  | 4.44711  | 375.875 |
| Phc3          | 7.11661  | 5.46576  | 7.40627  | 441.375 |
| Pfkfb2        | 5.62761  | 5.90079  | 9.20001  | 738.625 |
| Pde4d         | 0.591053 | 1.41763  | 0.615324 | 365.125 |
| Nin           | 1.77316  | 2.12644  | 4.92259  | 380.5   |
| Ncl           | 251.067  | 198.481  | 141.741  | 445.125 |
| Mylk4         | 0        | 0.708814 | 0.615324 | 1011.62 |
| Mrps25        | 112.493  | 88.7203  | 67.5191  | 402.5   |
| Med16         | 1.16015  | 0        | 2.53122  | 628.25  |
| Mapre1        | 70.5482  | 57.7055  | 34.6115  | 440     |
| Hjulp         | 14.5609  | 7.93331  | 12.3509  | 400.875 |
| Gm3414        | 4.5429   | 2.81803  | 2.33572  | 394.125 |
| Gfap          | 6.31606  | 8.99126  | 8.81022  | 1099.62 |
| Gas7          | 19.9281  | 13.645   | 18.6902  | 358.625 |
| Fubp1         | 31.8986  | 19.5383  | 17.6917  | 610.125 |
| Fam126b       | 5.77638  | 3.90741  | 8.65036  | 460.25  |
| Dclk1         | 76.5562  | 61.9166  | 52.9008  | 437.375 |
| Ctdspl2       | 47.9911  | 40.2497  | 27.5808  | 364.75  |
| Creb1         | 13.2547  | 9.16945  | 7.2653   | 446.75  |
| Cdk7          | 16.7497  | 8.09794  | 10.072   | 455.875 |
| Cd300a        | 0.591053 | 0        | 0.615324 | 677.375 |
| Ccdc50        | 14.2448  | 11.1672  | 11.6572  | 440.875 |

|               |          |          |          |         |
|---------------|----------|----------|----------|---------|
| Agps          | 3.23032  | 3.21582  | 1.57327  | 483.25  |
| Add2          | 16.7336  | 8.13483  | 8.20917  | 419.25  |
| Adam22        | 4.50173  | 2.83525  | 2.87384  | 511     |
| Acap2         | 14.0796  | 11.9495  | 10.6396  | 480.625 |
| 6720489N17Rik | 5.73552  | 2.40956  | 1.7204   | 879.5   |
| Zfp677        | 3.41584  | 0.708814 | 2.43994  | 471.143 |
| Wnk3          | 9.15407  | 5.70561  | 9.98502  | 501.429 |
| Ube2w         | 6.02348  | 5.70942  | 7.1372   | 372.286 |
| Ttc39b        | 0.332194 | 0        | 2.33572  | 587.429 |
| Syn3          | 3.52436  | 3.11837  | 4.48557  | 410.286 |
| Srprb         | 4.08023  | 1.7982   | 3.05526  | 746.857 |
| Shisa6        | 0        | 0.708814 | 0        | 340.857 |
| Rnf152        | 1.18211  | 0.380568 | 0.615324 | 407.286 |
| Rbms3         | 15.2597  | 5.91802  | 8.19983  | 425.571 |
| Ralgps1       | 5.31371  | 1.46995  | 2.32844  | 414.571 |
| Rab27b        | 37.97    | 34.9577  | 30.6835  | 405.286 |
| Prrg3         | 6.77064  | 1.46995  | 0.685246 | 459.714 |
| Prkca         | 3.28746  | 3.49894  | 6.9429   | 408.857 |
| Pogk          | 2.21177  | 2.80081  | 4.77293  | 451.857 |
| Plxna2        | 10.4865  | 4.03173  | 6.04193  | 434.571 |
| Plaa          | 3.72607  | 1.41763  | 1.98581  | 359.857 |
| Pikfyve       | 3.98493  | 1.85052  | 3.3066   | 406.714 |
| Pigm          | 1.5143   | 0        | 1.23065  | 380.143 |
| Pigk          | 8.80156  | 4.13054  | 6.5175   | 2458.57 |
| Pde1c         | 6.98045  | 3.97696  | 7.83092  | 457.143 |
| Pcdh10        | 128.522  | 93.4852  | 66.0644  | 600.714 |
| Myo15         | 1.5143   | 0.380568 | 1.23065  | 344.571 |
| Mrpl11        | 14.8205  | 8.07899  | 7.77386  | 636.857 |
| Lrtm1         | 0        | 0        | 0.615324 | 385.714 |
| Lin7a         | 20.8001  | 12.3199  | 11.4627  | 349.429 |
| Irgq          | 3.54632  | 1.41763  | 2.18859  | 458.571 |
| Inpp4b        | 17.2001  | 18.7322  | 20.7579  | 532     |
| Igf1r         | 1.25544  | 1.14171  | 1.30057  | 386.714 |
| Hif1an        | 70.7511  | 37.2004  | 33.4341  | 370.714 |
| Gxylt1        | 0.591053 | 0        | 1.23065  | 414.429 |
| Gpatch11      | 78.9671  | 65.4441  | 61.2853  | 1012.57 |
| Gnao1         | 18.1493  | 10.5416  | 4.52432  | 1326.86 |
| Fign          | 3.96236  | 3.11837  | 3.47236  | 432.571 |
| Fbxo32        | 0.591053 | 1.41763  | 2.53122  | 361.714 |
| Fbxl20        | 0.332194 | 0        | 0.615324 | 643.714 |
| Faxc          | 9.52231  | 5.13966  | 8.9015   | 392     |
| Fam198b       | 0.591053 | 0.380568 | 1.23065  | 478     |
| Ept1          | 6.54961  | 3.17069  | 4.66226  | 469     |
| Dusp11        | 13.875   | 8.28461  | 6.37521  | 456.571 |
| Dcp2          | 3.39295  | 1.32017  | 4.57743  | 497.143 |
| D430019H16Rik | 6.4766   | 3.1986   | 0.685246 | 431.143 |
| Cux1          | 62.2535  | 37.5539  | 34.7249  | 408.857 |

|               |          |          |          |         |
|---------------|----------|----------|----------|---------|
| Cep97         | 3.57303  | 2.98884  | 4.77509  | 432.286 |
| Car8          | 7.1189   | 5.67466  | 7.47167  | 507.857 |
| BB014433      | 0        | 0        | 0.615324 | 1303.86 |
| Asxl3         | 3.43413  | 1.08938  | 0.685246 | 455.571 |
| Arrb1         | 5.07082  | 2.87035  | 5.33878  | 469.143 |
| A830082N09Rik | 4.46957  | 4.02928  | 8.24271  | 501.143 |
| 1700001L05Rik | 1.5143   | 1.14171  | 0.342623 | 485.286 |
| 1200014J11Rik | 8.22506  | 4.58832  | 4.33903  | 417.286 |
| Zfp558        | 1.25544  | 0.708814 | 0.615324 | 671     |
| Zfp113        | 2.10535  | 1.41763  | 1.91589  | 503.833 |
| Whsc1         | 70.7058  | 36.4691  | 52.1135  | 368.5   |
| Trps1         | 6.84787  | 3.87951  | 2.53122  | 420.5   |
| Trim9         | 13.2151  | 6.18442  | 4.86694  | 356.833 |
| Tns3          | 3.28746  | 1.08938  | 0        | 447.833 |
| Tfdp2         | 3.2655   | 1.7982   | 2.18859  | 422.167 |
| Tbl1xr1       | 2.51088  | 1.4004   | 2.60114  | 526.167 |
| Tbc1d24       | 7.16395  | 7.2245   | 6.22808  | 679.167 |
| Syt14         | 3.74803  | 0.761137 | 2.18859  | 370.333 |
| Sv2c          | 11.2221  | 6.21049  | 7.70203  | 835     |
| Specc1        | 6.96662  | 7.88682  | 7.82223  | 349.667 |
| Socs7         | 0.332194 | 1.08938  | 0.342623 | 363.667 |
| Sestd1        | 3.8947   | 1.08938  | 0        | 395.167 |
| Sema5a        | 1.5143   | 0.380568 | 0.957947 | 394.5   |
| Samd8         | 0.591053 | 0        | 0.957947 | 392.167 |
| Runx1t1       | 9.86238  | 9.09224  | 6.22316  | 389.5   |
| Rorb          | 7.91695  | 8.4148   | 8.5176   | 588.5   |
| Rlim          | 40.2239  | 28.283   | 23.086   | 368.667 |
| Rfx3          | 10.6001  | 8.51296  | 2.53122  | 445.167 |
| Pten          | 0.332194 | 0.708814 | 0.342623 | 535.667 |
| Prkcb         | 12.9228  | 8.89353  | 6.88648  | 448.833 |
| Pqlc1         | 0.664388 | 0.761137 | 0        | 472.167 |
| Poldip3       | 6.90501  | 3.59639  | 5.60803  | 605.333 |
| Pes1          | 17.3764  | 14.4433  | 12.1015  | 1471.83 |
| Pcnx          | 0.923247 | 0.708814 | 0.342623 | 373     |
| Pcdh15        | 9.90196  | 5.37736  | 4.37719  | 389     |
| Pak3          | 40.0967  | 20.5631  | 20.5151  | 425.167 |
| Nova1         | 8.60117  | 6.76405  | 6.2841   | 481.5   |
| Mrpl15        | 18.1798  | 7.61876  | 9.01378  | 444.333 |
| Mlec          | 2.67445  | 2.23109  | 0.957947 | 386     |
| Med13         | 10.3545  | 3.97696  | 7.38694  | 338.833 |
| Mecp2         | 3.85655  | 3.85509  | 4.25526  | 583.5   |
| Lym9          | 7.0673   | 3.21998  | 5.75989  | 371.833 |
| Lifr          | 3.54632  | 2.12644  | 2.40564  | 508.667 |
| Klhl24        | 13.0949  | 11.8625  | 10.2051  | 600.333 |
| Hnrnp1        | 10.4204  | 7.8698   | 9.2404   | 420.667 |
| Emc8          | 11.2938  | 5.82748  | 7.7939   | 364.833 |
| Elf2          | 4.21071  | 0        | 3.83179  | 395.167 |

|               |          |          |          |         |
|---------------|----------|----------|----------|---------|
| Dock9         | 40.248   | 20.2073  | 18.158   | 821.167 |
| Dlg2          | 192.079  | 155.896  | 94.3163  | 311.167 |
| Crebrf        | 8.17275  | 11.089   | 14.7244  | 455     |
| Chic1         | 5.16704  | 6.41442  | 6.44021  | 479.167 |
| Cdyl2         | 6.17414  | 2.70219  | 3.54501  | 419.5   |
| Cdc40         | 20.5237  | 15.0883  | 20.4567  | 640.333 |
| Cbfa2t3       | 1.25544  | 0.380568 | 3.29367  | 343     |
| Camk2d        | 14.7786  | 10.7213  | 17.7991  | 373.833 |
| Camk2a        | 80.0514  | 85.3947  | 109.453  | 340.833 |
| Bcl2l13       | 2.10535  | 2.17876  | 1.02787  | 387.667 |
| Bcl11b        | 37.8165  | 25.558   | 29.0177  | 449.167 |
| AW549877      | 16.2295  | 12.0176  | 12.2624  | 397.833 |
| Asb1          | 1.5143   | 0.708814 | 0        | 393.167 |
| Arhgef12      | 9.14085  | 3.54407  | 6.6189   | 373.167 |
| Arhgap11a     | 17.6666  | 4.9617   | 6.6357   | 1441.83 |
| Aptx          | 7.12205  | 8.74375  | 3.451    | 1742.83 |
| Amer1         | 9.17393  | 1.7982   | 2.53122  | 474.667 |
| 4931428F04Rik | 7.82826  | 2.55933  | 2.74827  | 1294.83 |
| 2900097C17Rik | 3.00664  | 2.50701  | 4.44711  | 360.5   |
| Zfp953        | 3.03972  | 0.380568 | 2.33572  | 405     |
| Zfp937        | 3.2655   | 3.59639  | 3.41924  | 470.4   |
| Zfp706        | 8.68115  | 3.82718  | 3.93544  | 373     |
| Zfp266        | 10.6986  | 5.01402  | 7.71886  | 402.2   |
| Xpr1          | 15.2374  | 9.30616  | 10.9443  | 409.4   |
| Wbscr25       | 0.664388 | 0        | 0.615324 | 392.4   |
| Uggt1         | 11.8255  | 6.75989  | 8.53696  | 337.8   |
| Trub1         | 22.4482  | 14.0737  | 11.3842  | 439     |
| Trp53bp1      | 22.8417  | 13.3736  | 13.1606  | 346.4   |
| Tpgs2         | 3.42268  | 3.97696  | 4.06177  | 474.4   |
| Tomm20        | 7.61932  | 5.60816  | 8.27496  | 403.8   |
| Tmtc1         | 2.43755  | 0        | 0.615324 | 406.2   |
| Thsd4         | 6.24487  | 3.83787  | 5.19982  | 340.6   |
| Tardbp        | 24.9806  | 16.3598  | 16.1572  | 373.4   |
| Syncrip       | 51.2169  | 16.7917  | 32.4563  | 480     |
| Stx2          | 0.332194 | 0.380568 | 0.615324 | 698.2   |
| Stox2         | 8.51164  | 4.63345  | 4.03457  | 444     |
| Srgap3        | 49.4577  | 27.818   | 41.0316  | 371.4   |
| Spg21         | 2.23373  | 0        | 1.23065  | 798.2   |
| Snx27         | 1.7512   | 0.380568 | 3.90899  | 408     |
| Slitrk2       | 8.15462  | 3.59639  | 7.87872  | 594.8   |
| Slc38a9       | 4.79966  | 2.50701  | 1.84597  | 375     |
| Slc30a4       | 0.591053 | 1.08938  | 0.957947 | 409.6   |
| Seh1l         | 18.1437  | 16.069   | 11.9644  | 534.4   |
| Rnmt          | 21.3005  | 15.5017  | 17.0534  | 315.4   |
| Rnf130        | 1.84649  | 1.08938  | 0.685246 | 407.2   |
| Rgs9          | 22.8444  | 13.8967  | 23.3028  | 607.6   |
| Rbfox3        | 19.9045  | 19.865   | 10.4172  | 209.6   |

|               |          |          |          |       |
|---------------|----------|----------|----------|-------|
| Raph1         | 0.996582 | 1.46995  | 0        | 348   |
| Rap1gap2      | 10.46    | 7.19659  | 11.8981  | 334.2 |
| Rabgap1l      | 84.2682  | 49.542   | 63.76    | 408.6 |
| Pyurf         | 4.74462  | 3.60359  | 2.16724  | 340.6 |
| Ptpn2         | 6.35599  | 3.42939  | 4.74136  | 466.8 |
| Prickle2      | 48.3032  | 28.6538  | 33.9566  | 343.8 |
| Plcx2         | 13.8475  | 5.44936  | 6.54049  | 442.2 |
| Pde7a         | 2.43755  | 0.708814 | 0.957947 | 437.4 |
| Pde10a        | 3.0286   | 3.59639  | 3.76186  | 413.8 |
| Pcdh19        | 4.46747  | 0        | 1.23065  | 434.2 |
| Orc4          | 127.732  | 108.545  | 88.2403  | 310.4 |
| Ogfrl1        | 0.923247 | 0.761137 | 0        | 472   |
| Nr6a1         | 2.82479  | 2.88758  | 7.45381  | 469.2 |
| Ncan          | 11.9967  | 5.33596  | 2.94257  | 531   |
| Nab1          | 2.17869  | 1.46995  | 0.685246 | 438.6 |
| Mrpl19        | 7.46477  | 6.81847  | 5.10924  | 469.4 |
| Mrpl17        | 15.9981  | 9.65711  | 8.24743  | 475   |
| Miat          | 10.0845  | 3.90741  | 2.53122  | 432.6 |
| Mgat4a        | 6.54658  | 5.83895  | 4.71981  | 377.4 |
| Magt1         | 3.76632  | 0.761137 | 3.40244  | 505.2 |
| Lrp6          | 2.64978  | 0.708814 | 0.957947 | 363.4 |
| Lcorl         | 6.78651  | 3.21582  | 5.13964  | 416.2 |
| Kcnd3         | 4.96532  | 1.7982   | 5.26521  | 375.6 |
| Kcna1         | 0.591053 | 1.08938  | 0        | 341.2 |
| Il17rd        | 1.419    | 0        | 0.615324 | 401   |
| Ifnar1        | 3.48917  | 4.58832  | 2.43994  | 428.2 |
| Gpr146        | 0.664388 | 0.380568 | 0.957947 | 661.8 |
| Gpalpp1       | 29.2769  | 27.3613  | 25.636   | 437.4 |
| Gna13         | 0.332194 | 0.380568 | 0.957947 | 438.2 |
| Gmnc          | 1.97487  | 0.380568 | 1.57327  | 373.2 |
| Gm608         | 0.923247 | 1.08938  | 0.957947 | 380.8 |
| Gm20554       | 0        | 0.708814 | 0        | 405.8 |
| Fam212b       | 2.56593  | 1.14171  | 6.85086  | 370.8 |
| Fam168a       | 48.5452  | 32.1384  | 29.6525  | 337.2 |
| Exoc8         | 0.923247 | 1.08938  | 0.957947 | 337.2 |
| Etnk1         | 2.10535  | 2.12644  | 3.48916  | 402   |
| Elac1         | 0        | 0        | 1.57327  | 371   |
| E330033B04Rik | 13.7006  | 3.57917  | 6.65726  | 301.8 |
| Dpy19l3       | 0.923247 | 1.41763  | 2.18859  | 492.8 |
| Dcc           | 7.39953  | 6.81221  | 0.957947 | 309.6 |
| Dcaf17        | 13.9062  | 8.29363  | 7.99761  | 538.4 |
| Dcaf10        | 0        | 0.380568 | 2.53122  | 439.4 |
| Ctdsp2        | 2.17869  | 0.708814 | 2.18859  | 493.6 |
| Cpsf6         | 16.9499  | 11.2599  | 6.72905  | 570.6 |
| Cpne5         | 2.69641  | 1.7982   | 1.23065  | 437.4 |
| Commd7        | 6.86594  | 2.23109  | 8.87111  | 402.2 |
| Cnot6l        | 1.18211  | 2.79012  | 2.09731  | 530   |



|               |          |          |          |        |
|---------------|----------|----------|----------|--------|
| Ccdc127       | 15.1199  | 17.2835  | 15.2183  | 369    |
| C77370        | 2.36421  | 1.72865  | 0.957947 | 435.6  |
| Bbx           | 4.37125  | 2.17876  | 6.51013  | 437.6  |
| Atxn1         | 40.022   | 19.7828  | 23.6576  | 404    |
| Atrn          | 0.664388 | 0        | 0.615324 | 501    |
| Asph          | 28.5212  | 24.2988  | 27.085   | 411.8  |
| Arhgap19      | 3.98493  | 2.55933  | 0.342623 | 969.2  |
| Apbb2         | 19.3604  | 11.0578  | 16.9162  | 374.2  |
| Ap3s2         | 26.812   | 14.6485  | 17.8643  | 407    |
| Ankrd33b      | 0        | 0.708814 | 0.615324 | 371    |
| Anapc1        | 15.7534  | 13.3597  | 7.73551  | 307.4  |
| Amotl1        | 0.591053 | 0.708814 | 0.615324 | 373.4  |
| Ago2          | 0.591053 | 0        | 1.10507  | 436.6  |
| Aff4          | 7.06491  | 5.34607  | 5.00678  | 405.8  |
| Abl2          | 2.10535  | 0.708814 | 0        | 602    |
| A230056J06Rik | 6.22077  | 3.52684  | 4.03457  | 440.4  |
| 9430037G07Rik | 0.591053 | 0.380568 | 0.615324 | 380.4  |
| 5031426D15Rik | 15.506   | 6.43165  | 10.9432  | 376.6  |
| 1500004A13Rik | 77.9838  | 60.8457  | 55.7173  | 412.8  |
| Zfp951        | 4.21071  | 4.13054  | 1.91589  | 570.75 |
| Zfp945        | 27.2824  | 17.4519  | 19.0032  | 344.5  |
| Zfp882        | 7.36559  | 4.44807  | 5.26521  | 386    |
| Zfp811        | 6.7033   | 3.21582  | 2.18859  | 428.25 |
| Zfp563        | 2.60111  | 1.41763  | 0.957947 | 389.25 |
| Zfp398        | 1.25544  | 2.17876  | 0.866667 | 300    |
| Zfp329        | 4.0357   | 5.49367  | 3.93544  | 376.75 |
| Ythdf3        | 4.02518  | 1.7982   | 3.14654  | 415.75 |
| Wisp1         | 0.591053 | 0.708814 | 0.615324 | 346    |
| Vps26b        | 9.01037  | 3.54407  | 2.25852  | 392.25 |
| Vma21         | 11.475   | 4.599    | 10.1925  | 470.75 |
| Usp45         | 13.2761  | 11.1834  | 10.6056  | 428.25 |
| Unc5d         | 0.664388 | 0        | 0.615324 | 503.75 |
| Unc5c         | 16.7501  | 6.21952  | 6.20636  | 346.25 |
| Uhrf1bp1      | 0.591053 | 1.08938  | 1.57327  | 878.75 |
| Ubr1          | 29.2926  | 17.5746  | 14.1623  | 338.25 |
| U2surp        | 50.1149  | 46.2741  | 47.533   | 461.25 |
| Trim2         | 40.539   | 20.3935  | 22.2985  | 463    |
| Traf3         | 0.332194 | 0.380568 | 0.957947 | 385    |
| Tmx4          | 13.0047  | 6.21182  | 14.471   | 420.5  |
| Tmx3          | 11.6061  | 6.00595  | 8.22526  | 343.75 |
| Tm9sf3        | 3.11245  | 0.380568 | 3.74506  | 422.75 |
| Thrb          | 5.87168  | 8.13239  | 6.32681  | 343.5  |
| Tet3          | 1.5143   | 1.7982   | 0.615324 | 382    |
| Tcf4          | 93.0792  | 51.0389  | 40.3175  | 418.25 |
| Tceanc2       | 9.74512  | 1.41763  | 3.7956   | 381    |
| Sypl          | 2.17869  | 2.55933  | 1.98581  | 430.75 |
| Styx          | 1.64268  | 0.708814 | 0.615324 | 384.5  |

|          |          |          |          |         |
|----------|----------|----------|----------|---------|
| Stx17    | 5.60179  | 3.03044  | 5.89291  | 468.75  |
| St8sia6  | 0        | 0        | 0.957947 | 419.75  |
| Ss18l1   | 6.60598  | 5.61554  | 5.94011  | 262.75  |
| Srrm4    | 8.30965  | 4.7381   | 6.92078  | 393.25  |
| Spry4    | 1.64268  | 0.708814 | 0        | 341.75  |
| Spock1   | 0        | 0.380568 | 0.615324 | 425.75  |
| Sox6     | 22.2683  | 15.6559  | 11.3545  | 344     |
| Smcr8    | 3.29858  | 2.50701  | 5.45243  | 424.75  |
| Slc7a14  | 5.22116  | 3.17069  | 5.86373  | 379.5   |
| Slc46a3  | 1.18211  | 1.08938  | 0        | 504     |
| Slc35f1  | 6.08429  | 2.55933  | 1.94962  | 430.75  |
| Sh3pxd2b | 1.7512   | 0.708814 | 0.957947 | 259.5   |
| Sft2d2   | 0.591053 | 0.708814 | 1.91589  | 422.25  |
| Sept6    | 3.0286   | 3.97696  | 1.84597  | 414.5   |
| Sept11   | 34.6978  | 43.6951  | 23.935   | 383.75  |
| Sephs1   | 1.419    | 0        | 1.10507  | 342.5   |
| Sec14l3  | 6.36798  | 0        | 0.615324 | 343.75  |
| Scn8a    | 8.75151  | 4.68577  | 9.57658  | 337.25  |
| Satb1    | 12.63    | 7.24511  | 4.97115  | 421.25  |
| Runx2    | 2.95527  | 0        | 0.615324 | 376     |
| Rreb1    | 1.5143   | 1.08938  | 3.07662  | 484     |
| Rpusd2   | 0        | 0        | 0.615324 | 422.25  |
| Rps6ka3  | 3.44465  | 1.7982   | 1.98581  | 382.25  |
| Rnf24    | 1.18211  | 0        | 0.957947 | 541.25  |
| Rnf165   | 0        | 2.17876  | 0.957947 | 1073.75 |
| Rnd1     | 4.84382  | 2.50701  | 0.615324 | 350.5   |
| Rgs7bp   | 3.28746  | 1.41763  | 1.91589  | 426.25  |
| Rcan3    | 0.664388 | 0.708814 | 0        | 426.5   |
| Rbm33    | 5.32968  | 2.48979  | 4.36856  | 418.75  |
| Ralgps2  | 16.2354  | 8.43491  | 6.34978  | 342.75  |
| Rad51d   | 4.79966  | 2.23109  | 3.41924  | 419.25  |
| Rab8b    | 38.6782  | 34.6294  | 28.8159  | 542.5   |
| Pvrl1    | 0.332194 | 1.08938  | 0        | 382.5   |
| Ptprb    | 1.84649  | 1.32017  | 1.82461  | 333.75  |
| Prrc2b   | 2.30707  | 1.72865  | 1.30057  | 375.5   |
| Prr14l   | 12.5347  | 5.9085   | 9.28787  | 413.5   |
| Plekha2  | 39.8757  | 25.5469  | 36.3842  | 385     |
| Plekha8  | 1.18211  | 0        | 1.30057  | 335.75  |
| Plekha3  | 0.332194 | 0.380568 | 1.57327  | 587     |
| Pik3ca   | 5.46615  | 6.3621   | 8.06913  | 463     |
| Pi15     | 3.15698  | 1.01984  | 0        | 384.75  |
| Phf6     | 24.0946  | 10.1227  | 6.67019  | 632.5   |
| Phf14    | 10.4206  | 4.43854  | 4.04883  | 630.25  |
| Pgpep1   | 1.84649  | 1.85052  | 1.23065  | 369.5   |
| Pgm5     | 1.18211  | 0        | 1.23065  | 424.5   |
| Pgm2l1   | 16.5199  | 10.1781  | 6.70563  | 421.75  |
| Peg13    | 31.7239  | 18.5403  | 33.286   | 424.25  |

|              |          |          |          |        |
|--------------|----------|----------|----------|--------|
| Pdzd2        | 9.89546  | 3.54407  | 3.90899  | 419.75 |
| Pdcd6ip      | 0.923247 | 1.46995  | 1.48199  | 382.75 |
| Pbx1         | 11.5886  | 3.21582  | 4.03457  | 415.5  |
| Pard3b       | 1.419    | 1.41763  | 2.06302  | 335.5  |
| Paqr8        | 3.43413  | 3.57917  | 2.60114  | 375.75 |
| Pank1        | 1.84649  | 0.761137 | 4.10449  | 373.75 |
| Palm2        | 2.17869  | 0.380568 | 0.957947 | 423.5  |
| Pafah1b1     | 13.699   | 11.5339  | 12.3987  | 379.25 |
| P2rx7        | 6.08181  | 3.59639  | 3.32796  | 467.5  |
| Osbpl3       | 3.28746  | 1.08938  | 2.80392  | 373    |
| Nwd1         | 8.98241  | 6.97346  | 9.75913  | 292.5  |
| Nufip1       | 4.46957  | 2.55933  | 2.18859  | 586.25 |
| Nucks1       | 13.3617  | 5.92874  | 6.12403  | 674.5  |
| Nr2e1        | 0.923247 | 0.708814 | 1.64319  | 1013   |
| Nqo2         | 6.45432  | 3.85509  | 4.9748   | 294.5  |
| Nkain3       | 4.35738  | 1.08938  | 2.05574  | 346.75 |
| Nfib         | 24.7008  | 11.7288  | 4.44711  | 378.5  |
| Nap1l1       | 26.4614  | 18.5163  | 18.1138  | 375.5  |
| Mysm1        | 35.6216  | 24.4934  | 25.5355  | 461.5  |
| Mxi1         | 9.04463  | 6.73881  | 7.18475  | 298.75 |
| Mxd1         | 0.996582 | 1.52227  | 0.615324 | 459.25 |
| Mpeg1        | 0.591053 | 1.41763  | 1.94962  | 387.5  |
| Mlph         | 0        | 0        | 0.957947 | 1373   |
| Med28        | 4.37427  | 1.85052  | 3.97891  | 464.25 |
| Mbp          | 232.175  | 385.041  | 255.836  | 338.25 |
| Mapt         | 37.2094  | 10.5699  | 10.1635  | 461    |
| Man1a2       | 20.7566  | 15.8914  | 21.9128  | 496.25 |
| Lsm11        | 3.2655   | 0.708814 | 0        | 300.25 |
| LOC102634431 | 1.77316  | 1.7982   | 2.18859  | 530    |
| Lmbr1        | 2.82479  | 2.40956  | 1.23065  | 342.75 |
| Lig3         | 5.69247  | 1.78097  | 5.11772  | 344.75 |
| Larp1        | 1.5143   | 0.380568 | 2.78256  | 392    |
| Kras         | 4.53146  | 1.7982   | 3.20239  | 428    |
| Kdm5a        | 2.10535  | 1.08938  | 2.4613   | 343.25 |
| Kctd12       | 0        | 0.380568 | 0.957947 | 420.5  |
| Katnal1      | 7.38091  | 7.9016   | 16.3074  | 375    |
| Itih5        | 8.67372  | 2.88758  | 5.42661  | 380.75 |
| Insr         | 1.84649  | 0        | 1.98581  | 379.25 |
| Ids          | 12.13    | 8.49573  | 12.263   | 382.25 |
| Hlf          | 4.85313  | 1.46995  | 4.99251  | 464.25 |
| Hhip         | 7.45489  | 12.2574  | 9.15555  | 421.25 |
| Gyk          | 5.11199  | 1.46995  | 5.01406  | 384.25 |
| Gspt1        | 2.56593  | 0.380568 | 0.957947 | 347.5  |
| Grin3a       | 15.3992  | 3.92464  | 3.14654  | 507.5  |
| Gm12992      | 0.332194 | 0.708814 | 0.342623 | 337.25 |
| Gas2l3       | 2.17869  | 0.708814 | 0.342623 | 392.5  |
| Ftx          | 19.3046  | 12.279   | 22.0665  | 351.75 |

|               |          |          |          |         |
|---------------|----------|----------|----------|---------|
| Fsd1l         | 35.6867  | 13.6595  | 21.5535  | 664.25  |
| Frrs1l        | 3.82137  | 2.17876  | 2.71264  | 338.5   |
| Foxp1         | 5.92672  | 2.08131  | 1.02787  | 380.75  |
| Foxk1         | 0.923247 | 0.761137 | 0        | 299.25  |
| Fosl2         | 3.23032  | 0.380568 | 3.05526  | 501.25  |
| Fn3k          | 3.69299  | 7.14046  | 8.40808  | 382.25  |
| Fbxo42        | 1.84649  | 0.708814 | 1.57327  | 342.5   |
| Esrrg         | 2.60111  | 2.12644  | 2.4613   | 345     |
| Epm2aip1      | 7.21735  | 5.92874  | 3.55909  | 338.5   |
| Elmod2        | 10.8665  | 4.66855  | 2.87384  | 423     |
| Eif5a2        | 3.31417  | 2.37395  | 3.51072  | 602.25  |
| Dynlt1a       | 4.51759  | 1.08938  | 0.342623 | 343.75  |
| Dnlz          | 5.29752  | 1.46995  | 0.957947 | 383.25  |
| Dennd5b       | 0.591053 | 0.380568 | 2.4613   | 376.25  |
| Dennd1b       | 1.18211  | 2.12644  | 1.89454  | 391.25  |
| Dcaf7         | 16.0214  | 4.536    | 4.25161  | 461.25  |
| Dap3          | 12.4328  | 7.34545  | 7.51726  | 384.25  |
| D830031N03Rik | 1.84649  | 0        | 1.30057  | 382     |
| D630041G03Rik | 3.10194  | 0        | 0.615324 | 456.25  |
| Crtc1         | 19.1389  | 11.712   | 17.3299  | 417.75  |
| Cntn2         | 1.77316  | 0        | 1.55191  | 386.5   |
| Cnr1          | 3.61965  | 1.7982   | 4.78973  | 415     |
| Clic5         | 0        | 0.708814 | 0.615324 | 376.5   |
| Chrdl1        | 1.38382  | 1.7982   | 1.97174  | 375.25  |
| Chid1         | 9.83622  | 8.65698  | 8.06913  | 347     |
| Celf1         | 3.43413  | 3.59639  | 1.57327  | 596.75  |
| Cdv3          | 3.0286   | 1.7982   | 1.91589  | 377.75  |
| Ccnd2         | 7.24709  | 1.4004   | 3.69194  | 383     |
| Ccdc116       | 0.591053 | 2.12644  | 0        | 390.25  |
| Cbfa2t2       | 1.85701  | 1.46995  | 0.615324 | 415.5   |
| Camk1d        | 3.30365  | 0.708814 | 1.73333  | 460.5   |
| Cacul1        | 0        | 1.41763  | 0.342623 | 462.75  |
| Cacna1c       | 4.21071  | 1.08938  | 0.957947 | 380.25  |
| Bri3bp        | 0.996582 | 0        | 0.685246 | 510.25  |
| Bcas3os1      | 0        | 0        | 1.23065  | 1732.25 |
| B3galt5       | 0.664388 | 1.08938  | 2.78256  | 544     |
| Arl5a         | 1.77316  | 3.14628  | 0.685246 | 421.75  |
| Arhgap20      | 0.591053 | 1.7982   | 0.615324 | 372     |
| AI593442      | 4.21071  | 5.62538  | 2.53122  | 505.25  |
| Acad9         | 4.63011  | 2.7378   | 2.67834  | 380     |
| A830010M20Rik | 24.7372  | 22.8121  | 24.3021  | 502.5   |
| A430105I19Rik | 1.05163  | 1.41763  | 0.957947 | 301.5   |
| 9830147E19Rik | 4.64932  | 1.41763  | 1.23065  | 540.25  |
| 4933432I09Rik | 0.923247 | 0.708814 | 0        | 761.75  |
| Zzz3          | 6.3873   | 5.85617  | 5.53538  | 286     |
| Zxdb          | 0.664388 | 1.08938  | 0.615324 | 340.333 |
| Znrf3         | 1.5143   | 0        | 1.84597  | 491.333 |

|           |          |          |          |         |
|-----------|----------|----------|----------|---------|
| Zmiz1     | 9.35368  | 3.21582  | 6.09759  | 391.333 |
| Zfp84     | 13.4913  | 5.82409  | 9.45283  | 444.333 |
| Zfp748    | 21.885   | 8.71792  | 11.7726  | 397.667 |
| Zfp719    | 8.98841  | 3.59639  | 2.95104  | 347.333 |
| Zfp462    | 23.0611  | 16.3373  | 18.2708  | 556.333 |
| Zfp446    | 0.591053 | 0        | 0.615324 | 341     |
| Zfp316    | 2.72857  | 0        | 1.23065  | 392.333 |
| Zfp275    | 3.28746  | 1.08938  | 0        | 448.667 |
| Zfp174    | 2.36421  | 1.72865  | 0.685246 | 397.667 |
| Zfp111    | 3.17527  | 0.380568 | 1.7204   | 290.667 |
| Zdhhc15   | 3.3608   | 4.20775  | 1.84597  | 287.667 |
| Zcchc8    | 19.1235  | 12.3576  | 8.35108  | 440.333 |
| Zbtb4     | 1.18211  | 0.708814 | 0        | 390.667 |
| Zak       | 0.923247 | 0.380568 | 1.30057  | 348     |
| Yy2       | 0        | 0        | 1.57327  | 659.667 |
| Ypel2     | 3.57848  | 2.17876  | 4.82819  | 387     |
| Wwp1      | 0        | 0        | 0.957947 | 293.333 |
| Wipf2     | 6.32626  | 6.49116  | 5.71225  | 445     |
| Wdr7      | 8.43044  | 5.88408  | 4.50751  | 334.333 |
| Wdr43     | 12.8046  | 8.68788  | 13.8034  | 335.667 |
| Wdr13     | 15.6448  | 8.99098  | 10.5306  | 350     |
| Wars2     | 10.174   | 5.01783  | 5.7425   | 341.333 |
| Vapb      | 5.46405  | 1.7982   | 3.57931  | 396     |
| Usp9x     | 3.0286   | 2.17876  | 1.82461  | 399.667 |
| Usp31     | 3.13357  | 1.61281  | 2.93983  | 443.667 |
| Ufm1      | 11.2723  | 8.32107  | 8.87306  | 548.667 |
| Ube2v2    | 7.1602   | 3.97696  | 1.57327  | 389.667 |
| Ube2g1    | 11.836   | 3.49894  | 5.31378  | 343.333 |
| Tyms      | 3.83188  | 1.41763  | 3.14654  | 604     |
| Txndc9    | 29.2637  | 13.427   | 15.4935  | 337     |
| Tub       | 0        | 0        | 0.685246 | 349.667 |
| Trp53inp1 | 0.664388 | 1.46995  | 0.615324 | 446     |
| Tor1aip2  | 11.6476  | 9.6776   | 13.4549  | 336     |
| Tnpo2     | 3.48917  | 1.08938  | 3.29367  | 342.333 |
| Tmem88b   | 4.86639  | 5.62782  | 13.332   | 464     |
| Tmem63a   | 0.923247 | 0.708814 | 3.41924  | 287.333 |
| Tmem18    | 3.87851  | 4.88096  | 1.84597  | 391.667 |
| Tmem106b  | 32.7308  | 23.6864  | 22.7328  | 396.333 |
| Thoc2     | 43.7908  | 23.4519  | 28.1747  | 494.333 |
| Thg1l     | 4.7798   | 2.17876  | 3.76186  | 340.333 |
| Tceanc    | 0        | 1.08938  | 0        | 389.667 |
| Tbc1d4    | 0        | 0        | 0.957947 | 342     |
| Tbc1d32   | 23.4264  | 16.3758  | 11.2002  | 347     |
| Tbc1d30   | 2.43755  | 0.380568 | 3.14654  | 395.667 |
| Taf1      | 25.8874  | 16.5017  | 9.23122  | 390.667 |
| Tacc1     | 5.00348  | 6.22904  | 6.79577  | 395.667 |
| Stxbp6    | 3.0286   | 1.32017  | 2.80392  | 282     |

|            |          |          |          |         |
|------------|----------|----------|----------|---------|
| Stxbp5     | 0.923247 | 0.380568 | 1.20929  | 389.667 |
| Strn       | 2.76974  | 3.26815  | 3.55909  | 394.333 |
| Strip2     | 5.83092  | 6.41687  | 6.41492  | 503.667 |
| Stk35      | 0        | 0        | 0.615324 | 443.667 |
| Stat1      | 1.32878  | 1.7982   | 5.82488  | 446.667 |
| Stam2      | 6.47752  | 8.64928  | 5.83782  | 288     |
| St6galnac3 | 5.73613  | 0.761137 | 6.51741  | 444.667 |
| St3gal1    | 5.23892  | 4.73471  | 1.84597  | 455.333 |
| Sspn       | 0.591053 | 1.4004   | 0.615324 | 461     |
| Ssh2       | 6.90712  | 3.59639  | 6.29308  | 445     |
| Srpk2      | 17.1051  | 11.0974  | 13.5433  | 349     |
| Srgap1     | 4.61624  | 0.708814 | 1.82461  | 447     |
| Spock2     | 39.7314  | 27.1435  | 41.0849  | 393.333 |
| Spin1      | 12.9156  | 5.98153  | 3.02097  | 355     |
| Sorcs1     | 1.84649  | 1.41763  | 2.18859  | 340.333 |
| Smarcal1   | 8.30206  | 7.98261  | 8.17214  | 334.333 |
| Slc9a5     | 2.36421  | 1.7982   | 0.342623 | 393     |
| Slc7a2     | 1.64268  | 1.08938  | 1.7204   | 395.333 |
| Slc43a2    | 4.09345  | 1.08938  | 5.13964  | 386.333 |
| Slc31a1    | 7.11871  | 5.77896  | 1.98581  | 393.333 |
| Slc2a9     | 1.25544  | 0        | 0.615324 | 342.667 |
| Slc2a13    | 0        | 1.08938  | 0.342623 | 345.667 |
| Slc25a44   | 11.1712  | 7.22097  | 7.77195  | 613.333 |
| Slc23a2    | 10.8922  | 4.40294  | 6.03346  | 472     |
| Skil       | 13.0941  | 7.72137  | 5.42216  | 398.333 |
| Shroom2    | 35.7297  | 18.0285  | 12.2081  | 388.667 |
| Sh3bgrl2   | 2.59777  | 4.05027  | 4.33447  | 458     |
| Sgk3       | 3.82137  | 4.23566  | 3.19966  | 341     |
| Setd7      | 9.83707  | 10.0793  | 10.4846  | 333.667 |
| Serp1      | 6.22077  | 3.42939  | 1.94962  | 343.667 |
| Sema3a     | 6.9402   | 5.01402  | 4.44711  | 286.667 |
| Scimp      | 0        | 0        | 0.615324 | 689     |
| Scd1       | 18.0968  | 7.97768  | 13.2262  | 396.333 |
| Scamp1     | 27.8712  | 20.0664  | 25.9164  | 398.333 |
| Sbk3       | 0        | 0        | 0.615324 | 557     |
| Rsf1       | 2.84308  | 3.41101  | 2.80392  | 342     |
| Rps6ka2    | 1.38382  | 1.08938  | 1.98581  | 569     |
| Rps15a     | 1.85701  | 2.28002  | 1.4477   | 345     |
| Rnf4       | 17.4553  | 15.2829  | 11.8048  | 336.333 |
| Rnf170     | 2.30707  | 1.46995  | 0.957947 | 289.667 |
| Rnf169     | 0        | 0.380568 | 0.615324 | 290.333 |
| Rmnd5a     | 1.18211  | 0.708814 | 0.342623 | 391     |
| Rictor     | 16.6118  | 8.03383  | 10.8237  | 450     |
| Rhoh       | 0.591053 | 0.708814 | 0.342623 | 396.333 |
| Reep3      | 3.96236  | 3.95974  | 1.57327  | 714.667 |
| Rcan2      | 20.8263  | 22.8231  | 39.957   | 395.333 |
| Rbpj       | 8.37061  | 8.1701   | 6.82188  | 392.333 |

|          |          |          |          |         |
|----------|----------|----------|----------|---------|
| Ranbp10  | 1.64268  | 2.17876  | 1.94962  | 396.667 |
| Rab11b   | 5.75442  | 3.83787  | 5.35669  | 335.667 |
| Pum2     | 10.8481  | 10.7396  | 4.18678  | 340.333 |
| Ptrh2    | 7.86406  | 2.81803  | 4.57685  | 348     |
| Ptprt    | 0.332194 | 0.761137 | 0.342623 | 337.667 |
| Ptpn4    | 4.21071  | 0.708814 | 1.82461  | 392.667 |
| Ptp4a3   | 0.923247 | 0        | 1.57327  | 350.333 |
| Prrx1    | 3.15698  | 1.7982   | 0.957947 | 352.667 |
| Prps1l3  | 9.18252  | 4.94447  | 8.93326  | 395     |
| Prpf19   | 13.2123  | 8.47735  | 12.2606  | 446.667 |
| Prkd3    | 3.28746  | 0        | 4.17441  | 336     |
| Prkaa2   | 4.35738  | 3.32047  | 2.06302  | 343.667 |
| Preb     | 3.61965  | 3.70104  | 2.80392  | 391.333 |
| Prdm16   | 0.923247 | 0        | 0.615324 | 392     |
| Ppargc1a | 9.98202  | 11.2259  | 12.9361  | 287     |
| Pofut1   | 0.664388 | 1.01984  | 0.615324 | 447.667 |
| Plekho2  | 2.5214   | 0.708814 | 3.72255  | 447     |
| Plekha2  | 0.332194 | 1.32017  | 2.78256  | 280.667 |
| Pkib     | 10.2277  | 2.81803  | 8.84689  | 388     |
| Pja2     | 228.11   | 189.085  | 202.026  | 445     |
| Pik3r1   | 53.3897  | 29.3545  | 39.47    | 397     |
| Pign     | 9.63718  | 3.49894  | 4.43304  | 338     |
| Phex     | 1.18211  | 0        | 0.615324 | 403     |
| Phactr2  | 6.72159  | 4.86424  | 2.43994  | 452     |
| Pds5b    | 16.8546  | 10.4113  | 10.5704  | 299     |
| Pdpn     | 8.68082  | 3.41101  | 1.64319  | 342.333 |
| Pdk1     | 1.18211  | 0.380568 | 1.23065  | 338.667 |
| Pdik1l   | 6.48166  | 3.49894  | 4.75157  | 286     |
| Pcyt1b   | 12.4857  | 7.75182  | 9.08293  | 396.667 |
| Pcmt1d1  | 25.4589  | 22.8051  | 43.1844  | 559.667 |
| Pank2    | 0.591053 | 2.50701  | 0.957947 | 509.333 |
| Otud7b   | 0.664388 | 0.708814 | 0        | 400.333 |
| Osbpl6   | 5.00348  | 6.1034   | 4.10449  | 451.333 |
| Oprk1    | 0.996582 | 1.7982   | 0.615324 | 336     |
| Opcml    | 55.5969  | 36.9908  | 34.9366  | 391     |
| Ociad1   | 59.9747  | 36.9553  | 53.1246  | 392.667 |
| Nxpe3    | 1.16015  | 3.49894  | 4.10449  | 410     |
| Nup50    | 10.9502  | 6.12281  | 5.82747  | 285     |
| Nt5dc3   | 0.591053 | 1.32017  | 0        | 397     |
| Nt5c2    | 4.80176  | 1.7982   | 3.76186  | 336.667 |
| Nr3c1    | 8.29094  | 7.58482  | 2.80392  | 389.667 |
| Npsr1    | 1.5143   | 0.380568 | 1.57327  | 393.333 |
| Npr3     | 6.21721  | 5.39703  | 4.03821  | 289.667 |
| Nkain2   | 18.7164  | 14.8123  | 21.7265  | 392.333 |
| Nipal2   | 0.923247 | 0        | 1.57327  | 344     |
| Nid1     | 4.16678  | 1.14171  | 0        | 394     |
| Nfasc    | 23.1772  | 32.494   | 10.272   | 338.333 |

|          |          |          |          |         |
|----------|----------|----------|----------|---------|
| Nars2    | 2.51088  | 1.08938  | 1.57327  | 344.667 |
| Myo6     | 8.02306  | 4.30765  | 4.71981  | 393     |
| Mul1     | 5.62971  | 3.26815  | 3.14654  | 337     |
| Mtf1     | 8.42806  | 5.85617  | 10.647   | 396.333 |
| Mon2     | 1.18211  | 0.708814 | 1.57327  | 345     |
| Mmgt1    | 25.774   | 15.6361  | 11.1903  | 333.333 |
| Mme      | 5.72501  | 1.7982   | 4.8383   | 385.333 |
| Mid2     | 0.923247 | 0.708814 | 2.18859  | 333.667 |
| Mical2   | 0.923247 | 1.08938  | 0.615324 | 295.667 |
| Mgat3    | 1.25544  | 3.97696  | 1.57327  | 292.667 |
| Mga      | 14.6883  | 11.3638  | 13.2478  | 392.667 |
| Megf10   | 1.18211  | 1.7982   | 2.80392  | 334     |
| Mau2     | 0        | 0        | 0.615324 | 341.667 |
| Map4     | 7.00776  | 1.46995  | 5.53083  | 614.333 |
| Map1b    | 78.6872  | 48.1541  | 39.7569  | 448     |
| Mal2     | 5.44419  | 6.63755  | 5.94147  | 346     |
| Lypd6    | 4.15356  | 2.43746  | 0.615324 | 382     |
| Lrrtm2   | 25.9674  | 18.8528  | 26.0062  | 342     |
| Lrrc75b  | 0        | 0.708814 | 0        | 508.667 |
| Lrrc39   | 0        | 1.72865  | 0        | 340.667 |
| Lrch3    | 0.591053 | 0        | 1.91589  | 450     |
| Lipt2    | 0.591053 | 0        | 0.615324 | 329.333 |
| Lbh      | 9.34212  | 10.4019  | 9.58822  | 386.333 |
| Larp4    | 26.2225  | 20.7135  | 14.3593  | 450.667 |
| Klhl18   | 5.43781  | 2.99222  | 3.92193  | 390.333 |
| Klf8     | 1.18211  | 1.7982   | 1.57327  | 394     |
| Klf13    | 2.23373  | 0.380568 | 0.615324 | 453.667 |
| Kif3c    | 1.77316  | 1.4004   | 0.342623 | 449.667 |
| Kif3b    | 7.52813  | 3.74997  | 0.615324 | 396.333 |
| Kif1b    | 2.76974  | 1.08938  | 1.30057  | 382     |
| Kdsr     | 6.77664  | 4.58832  | 1.82461  | 455.333 |
| Kctd12b  | 3.15698  | 3.54407  | 0        | 287.333 |
| lws1     | 2.17869  | 2.50701  | 1.57327  | 560.667 |
| Ivns1abp | 12.8683  | 9.87676  | 4.45076  | 237.333 |
| Itpr1l1  | 3.5024   | 1.32017  | 0        | 388.333 |
| Itch     | 18.5173  | 6.34488  | 10.0378  | 288.667 |
| Irs1     | 0        | 0        | 0.685246 | 451.333 |
| Ireb2    | 0        | 1.41763  | 1.64319  | 412.667 |
| Iqce     | 9.19426  | 5.82056  | 3.57931  | 458     |
| Intu     | 0        | 1.08938  | 1.23065  | 384.333 |
| Igsf3    | 6.57282  | 1.08938  | 2.53122  | 282.667 |
| Ighmbp2  | 2.36421  | 1.46995  | 1.84597  | 505.667 |
| Igf1     | 20.3874  | 8.10797  | 5.97201  | 393.333 |
| Ifit2    | 5.51245  | 2.02899  | 4.62853  | 447     |
| Ifih1    | 0        | 0        | 0.957947 | 345.667 |
| Hspbap1  | 2.44806  | 1.08938  | 3.86552  | 336.333 |
| Hspa13   | 4.94002  | 1.14171  | 1.57327  | 397     |



|               |          |          |          |         |
|---------------|----------|----------|----------|---------|
| Hs2st1        | 5.47635  | 2.02899  | 1.91589  | 402.333 |
| Hpcal4        | 6.77664  | 3.64871  | 2.51441  | 452     |
| Homez         | 0        | 1.08938  | 0.957947 | 400     |
| Hip1          | 3.2655   | 2.17876  | 1.57327  | 400.333 |
| Hdgfrp3       | 5.93994  | 3.21582  | 4.32154  | 388.333 |
| Gucy2e        | 0        | 0        | 0.615324 | 350.333 |
| Gria2         | 273.449  | 184.199  | 223.817  | 344     |
| Grb10         | 2.80283  | 0.380568 | 2.09731  | 292.333 |
| Gprc5b        | 0        | 0.380568 | 0.685246 | 346.333 |
| Gnai1         | 7.06694  | 4.44807  | 4.26455  | 338.667 |
| Gmeb2         | 1.7512   | 1.41763  | 2.74827  | 340.667 |
| Gm9079        | 1.18211  | 0.708814 | 1.10507  | 398.333 |
| Gm21276       | 0        | 0        | 0.615324 | 341.333 |
| Gm20597       | 0        | 0.708814 | 0        | 345.667 |
| Gm18853       | 0.591053 | 0.708814 | 4.17441  | 454.333 |
| Gm17066       | 20.6239  | 8.55809  | 16.6979  | 454.333 |
| Gm16702       | 0.591053 | 0        | 0.615324 | 335     |
| Gm16523       | 3.54632  | 0.761137 | 2.33572  | 391.333 |
| Gm11190       | 2.43755  | 1.41763  | 0        | 495.667 |
| Glcci1        | 7.31264  | 1.08938  | 9.881    | 344.667 |
| Galntl6       | 28.5526  | 15.1754  | 13.7684  | 337     |
| Gabrb2        | 3.61965  | 6.26465  | 5.66095  | 334.667 |
| G3bp2         | 41.604   | 32.6039  | 41.0826  | 447     |
| G2e3          | 11.794   | 9.55684  | 4.77566  | 450     |
| Fundc2        | 1.97487  | 1.14171  | 0.866667 | 393.667 |
| Fstl1         | 11.516   | 7.08879  | 5.71225  | 395     |
| Frmd4a        | 42.3651  | 20.8523  | 12.3207  | 341.667 |
| Foxred2       | 0.332194 | 0.708814 | 1.23065  | 341     |
| Fnbp1         | 19.4129  | 6.96918  | 12.8998  | 406.333 |
| Fgf1          | 3.52436  | 2.54211  | 5.58648  | 335.667 |
| Fgf12         | 61.7844  | 47.7633  | 70.5742  | 283.333 |
| Fam78b        | 2.76974  | 0.708814 | 0.685246 | 292     |
| Fam53c        | 2.36421  | 1.41763  | 0.615324 | 591     |
| Fam206a       | 7.94762  | 2.12644  | 5.2225   | 290     |
| Fam120c       | 5.05852  | 1.41763  | 3.43232  | 285.667 |
| Exph5         | 2.36421  | 3.21582  | 12.0875  | 394.333 |
| Evi2a-evi2b   | 5.00409  | 9.75464  | 34.9572  | 281.333 |
| Ero1l         | 2.10535  | 1.41763  | 2.18859  | 439.333 |
| Ermap         | 0.923247 | 0        | 1.23065  | 346     |
| Ercc4         | 2.85359  | 1.46995  | 0.957947 | 445.333 |
| Erc1          | 3.17527  | 3.92464  | 0.342623 | 339     |
| Entpd1        | 6.2779   | 5.70942  | 3.02097  | 351.333 |
| Emc1          | 4.01709  | 3.17069  | 4.09586  | 348.333 |
| Elovl6        | 4.57598  | 2.88758  | 2.92969  | 341.333 |
| E330020D12Rik | 0.923247 | 1.32017  | 0.615324 | 288.333 |
| Dynll2        | 6.00006  | 3.57917  | 5.80353  | 346.333 |
| Dtx4          | 30.8803  | 20.6372  | 20.3555  | 389     |

|               |          |          |          |         |
|---------------|----------|----------|----------|---------|
| Dnajc1        | 0.591053 | 0        | 0.615324 | 337.667 |
| Diexf         | 6.90501  | 8.71933  | 5.13964  | 345     |
| Dido1         | 24.205   | 14.2079  | 14.974   | 347.333 |
| Diap2         | 9.93056  | 3.49894  | 8.93211  | 507     |
| Dcun1d3       | 4.57598  | 0.380568 | 1.23065  | 502.333 |
| Dach2         | 0        | 0.708814 | 0        | 343     |
| D630045J12Rik | 0.332194 | 0        | 0.615324 | 344.333 |
| D430041D05Rik | 3.43413  | 1.7982   | 1.30057  | 564.667 |
| Cyp26b1       | 2.06418  | 0.708814 | 0.342623 | 331.333 |
| Cyld          | 4.8751   | 8.03796  | 9.20596  | 391     |
| Cxxc4         | 4.99203  | 0.380568 | 1.23065  | 341.667 |
| Cxcl12        | 5.00409  | 5.64423  | 1.94962  | 398.667 |
| Ctps2         | 18.1004  | 7.75182  | 11.9006  | 387.667 |
| Crk           | 2.95527  | 0.708814 | 0.342623 | 399.333 |
| Cpeb3         | 4.83484  | 1.46995  | 3.83179  | 611.333 |
| Coa5          | 9.61761  | 3.26815  | 5.88054  | 445.667 |
| Cngb3         | 0.827951 | 0        | 0.615324 | 459.667 |
| Chst11        | 0.591053 | 0        | 1.57327  | 447     |
| Chml          | 9.86028  | 6.1034   | 5.33513  | 335     |
| Chd5          | 47.5732  | 33.293   | 34.8681  | 347.667 |
| Cfl2          | 9.42767  | 6.36929  | 5.17973  | 387.667 |
| Cep83os       | 3.87851  | 2.81803  | 4.23026  | 456.333 |
| Cecr2         | 0        | 0.708814 | 0        | 338.667 |
| Cds2          | 6.22077  | 7.65437  | 9.96367  | 678     |
| Cdk19         | 7.20677  | 3.95974  | 9.79419  | 342.667 |
| Cdh4          | 0        | 0        | 1.02787  | 387.667 |
| Cdc27         | 15.2103  | 8.01001  | 7.66842  | 286     |
| Cdc14b        | 1.18211  | 0        | 1.57327  | 458.333 |
| Cd93          | 4.33909  | 2.17876  | 0.957947 | 333.333 |
| Cd2ap         | 0.591053 | 0        | 0.615324 | 458     |
| Ccser2        | 18.7927  | 5.72283  | 8.29912  | 292.667 |
| Ccdc85b       | 2.10535  | 2.08131  | 1.30057  | 399.333 |
| Ccdc71        | 0.591053 | 1.08938  | 0.342623 | 519.667 |
| Ccbe1         | 1.77316  | 1.41763  | 1.84597  | 340.667 |
| Cask          | 3.3608   | 3.92464  | 1.4477   | 509.667 |
| Cacnb4        | 22.3185  | 22.0925  | 26.517   | 494.667 |
| Cacna1e       | 27.6176  | 15.8766  | 14.5283  | 396.667 |
| C3ar1         | 0.923247 | 0        | 1.30057  | 395     |
| Btbd9         | 3.1702   | 1.7982   | 2.18859  | 559     |
| Bsn           | 1.5143   | 1.41763  | 0.615324 | 349.333 |
| Bicap         | 4.9998   | 1.01984  | 3.81771  | 352.333 |
| Birc5         | 3.3608   | 1.32017  | 0        | 387.333 |
| Bhlhe41       | 34.4101  | 24.3083  | 53.0622  | 395.667 |
| Bcl2          | 3.18882  | 2.48979  | 1.84597  | 442.333 |
| Bcat1         | 8.65831  | 5.49923  | 10.1464  | 389     |
| Bbs1          | 7.16387  | 2.88758  | 4.44711  | 336     |
| Bag3          | 0        | 0.708814 | 1.7204   | 516.667 |

|               |          |          |          |         |
|---------------|----------|----------|----------|---------|
| Baalc         | 3.78322  | 2.12644  | 3.25019  | 396.333 |
| Azi2          | 5.55638  | 4.30521  | 0.615324 | 341     |
| Atp8a1        | 7.23721  | 4.17214  | 3.46781  | 351.333 |
| Atp2b4        | 32.9581  | 24.8847  | 19.8829  | 394.333 |
| Atf2          | 38.6684  | 25.7653  | 27.7765  | 457     |
| Atad2b        | 0.923247 | 1.14171  | 0.685246 | 392.667 |
| Arl11         | 0        | 0        | 1.84597  | 440.333 |
| Arih1         | 1.91983  | 0.761137 | 1.23065  | 451     |
| Arid5a        | 2.00671  | 1.32017  | 0.615324 | 499.333 |
| Arhgap28      | 0.591053 | 0.708814 | 0.342623 | 440.333 |
| Arhgap25      | 1.5143   | 2.50701  | 2.67834  | 235.667 |
| Ap3m1         | 11.1069  | 9.74114  | 6.72599  | 510.333 |
| Antxr1        | 0.332194 | 0        | 0.957947 | 338.333 |
| Ano5          | 3.3608   | 0.708814 | 1.7204   | 509.333 |
| Ankfy1        | 15.6577  | 11.5593  | 15.1643  | 455     |
| Alg10b        | 0        | 0        | 0.615324 | 394     |
| Aldh5a1       | 0.591053 | 0.380568 | 1.23065  | 340.667 |
| Akap5         | 27.3618  | 22.7774  | 17.0409  | 333.333 |
| Akap11        | 15.7155  | 12.2358  | 19.3003  | 388.333 |
| Aebp2         | 1.7512   | 0.380568 | 1.30057  | 509.333 |
| Adamts5       | 0.591053 | 0        | 0.615324 | 287     |
| Actr1a        | 55.9505  | 36.9795  | 31.4559  | 282.333 |
| Abhd13        | 0.827951 | 0.380568 | 1.91589  | 446.333 |
| Abca5         | 5.73552  | 1.85052  | 2.87384  | 503     |
| Aasdhppt      | 33.0381  | 28.5901  | 17.6403  | 464     |
| 9330158H04Rik | 3.59769  | 1.41763  | 1.57327  | 394     |
| 6330416G13Rik | 0.591053 | 0.708814 | 0        | 435.333 |
| 5330413P13Rik | 0        | 0.708814 | 1.57327  | 240     |
| 4833422C13Rik | 0.332194 | 1.46995  | 0.342623 | 345.333 |
| 2810417H13Rik | 3.24628  | 1.32017  | 0        | 415.667 |
| 2610002M06Rik | 10.9864  | 4.82864  | 4.77566  | 555.333 |
| 2510009E07Rik | 2.10535  | 1.08938  | 1.64319  | 493.667 |
| 2310022B05Rik | 1.5143   | 0        | 0.957947 | 340.667 |
| 2010111I01Rik | 10.8728  | 8.99342  | 9.34778  | 334     |
| Zzef1         | 2.43755  | 0.708814 | 0.342623 | 500.5   |
| Zwint         | 240.28   | 195.482  | 190.329  | 261     |
| Zscan26       | 17.3481  | 17.0921  | 18.9952  | 418     |
| Zrsr2         | 22.7825  | 11.6385  | 16.5296  | 339     |
| Zmym2         | 8.98748  | 5.75793  | 6.81459  | 586     |
| Zfyve20       | 14.7846  | 11.511   | 14.3236  | 338.5   |
| Zfx           | 5.53948  | 2.79012  | 2.18859  | 517     |
| Zfp955b       | 11.4535  | 8.16749  | 5.78672  | 341.5   |
| Zfp9          | 1.84649  | 1.08938  | 0.342623 | 340     |
| Zfp866        | 12.1878  | 5.27991  | 6.19318  | 501     |
| Zfp850        | 2.23373  | 0.708814 | 1.84597  | 421     |
| Zfp831        | 0        | 0        | 0.615324 | 415.5   |
| Zfp799        | 8.47703  | 6.43545  | 11.5476  | 436     |

|         |          |          |          |       |
|---------|----------|----------|----------|-------|
| Zfp78   | 0.923247 | 1.32017  | 0.866667 | 412.5 |
| Zfp773  | 4.37093  | 2.12644  | 0.615324 | 342   |
| Zfp738  | 14.1801  | 7.92978  | 11.5453  | 427.5 |
| Zfp68   | 12.64    | 11.5167  | 5.13577  | 340.5 |
| Zfp521  | 13.3782  | 8.95695  | 7.5193   | 432.5 |
| Zfp518a | 2.10535  | 0.380568 | 0.957947 | 499   |
| Zfp488  | 0.591053 | 1.7982   | 0.342623 | 414.5 |
| Zfp422  | 5.82543  | 2.55933  | 3.25019  | 334.5 |
| Zfp354c | 7.31326  | 1.7982   | 1.64319  | 339   |
| Zfp281  | 0.664388 | 0.708814 | 0        | 262.5 |
| Zfp280b | 0.332194 | 0.380568 | 0.685246 | 344.5 |
| Zfp236  | 1.25544  | 0.708814 | 0.957947 | 497   |
| Zfp229  | 4.13737  | 3.49894  | 0.957947 | 345   |
| Zfp120  | 11.8335  | 7.06461  | 5.94183  | 662.5 |
| Zfp11   | 1.77316  | 1.46995  | 0.342623 | 340   |
| Zfhx3   | 0        | 1.08938  | 0        | 1328  |
| Zfa-ps  | 0.332194 | 0.708814 | 0        | 497   |
| Zeb2    | 41.8931  | 22.9046  | 29.2447  | 504.5 |
| Zbtb43  | 11.3264  | 15.7415  | 15.2436  | 430.5 |
| Zbtb26  | 5.31371  | 2.50701  | 1.23065  | 425   |
| Yod1    | 1.5143   | 2.12644  | 0        | 337   |
| Ykt6    | 13.4716  | 10.3429  | 3.97891  | 347.5 |
| Yipf6   | 19.7265  | 10.2745  | 15.4246  | 340.5 |
| Xpnpep3 | 4.83484  | 3.59639  | 5.41234  | 506   |
| Xkr4    | 2.10535  | 1.41763  | 0.615324 | 263.5 |
| Xirp1   | 0        | 0.380568 | 0.615324 | 432.5 |
| Xiap    | 10.6551  | 5.6777   | 5.40506  | 411.5 |
| Xaf1    | 1.64268  | 1.08938  | 2.09731  | 686   |
| Wtap    | 0.996582 | 0.380568 | 0.957947 | 425.5 |
| Wdr73   | 1.5143   | 5.85617  | 1.30057  | 191   |
| Wdr33   | 62.713   | 48.3447  | 36.8582  | 343   |
| Wdfy3   | 4.41242  | 1.46995  | 2.74827  | 421.5 |
| Wash    | 1.5143   | 0.708814 | 2.53122  | 337.5 |
| Vti1a   | 17.8037  | 11.6447  | 14.2969  | 257.5 |
| Vps37a  | 3.0286   | 1.46995  | 0.957947 | 422   |
| Vps26a  | 20.4611  | 15.4008  | 13.7858  | 260.5 |
| Vav3    | 0.923247 | 2.17876  | 1.84597  | 329   |
| Vamp3   | 4.61414  | 3.49894  | 2.09731  | 337.5 |
| Uvssa   | 3.15698  | 1.7982   | 1.57327  | 349   |
| Uty     | 25.454   | 11.8419  | 18.5423  | 337   |
| Usp48   | 5.39071  | 3.64871  | 3.83179  | 340   |
| Unc80   | 7.38388  | 3.97696  | 8.15332  | 349   |
| Unc13a  | 3.88871  | 1.46995  | 1.57327  | 423.5 |
| Unc119b | 0.332194 | 0        | 1.57327  | 339   |
| Ubxn8   | 3.92989  | 2.10922  | 3.12974  | 417   |
| Ubr2    | 3.48917  | 2.7378   | 2.53122  | 344   |
| Ube2r2  | 5.39071  | 2.23109  | 4.44711  | 337.5 |

|          |          |          |          |       |
|----------|----------|----------|----------|-------|
| Ube2q2   | 6.18558  | 3.52684  | 5.26541  | 339.5 |
| Ube2h    | 8.17368  | 9.09939  | 4.35583  | 346   |
| Txn14a   | 61.0885  | 43.6909  | 39.6711  | 337.5 |
| Tulp4    | 140.145  | 88.22    | 208.202  | 341   |
| Tubgcp4  | 2.56593  | 2.17876  | 1.30057  | 338.5 |
| Tube1    | 2.82479  | 0        | 1.7204   | 349   |
| Ttc19    | 0.923247 | 2.55933  | 3.81771  | 430   |
| Ttbk1    | 0.664388 | 0        | 1.57327  | 253.5 |
| Tsr2     | 20.2387  | 17.7794  | 16.5542  | 341.5 |
| Tspyl5   | 0        | 0.380568 | 0.615324 | 336.5 |
| Tspan7   | 76.8578  | 64.2788  | 78.7865  | 331.5 |
| Tspan2   | 9.12791  | 8.64932  | 2.40564  | 354.5 |
| Tspan15  | 0        | 0        | 0.615324 | 507   |
| Trmt2b   | 1.77316  | 0        | 1.57327  | 416   |
| Trio     | 0.332194 | 0        | 0.685246 | 333   |
| Trim44   | 39.2531  | 22.0738  | 33.0774  | 421   |
| Trim30a  | 0        | 0.708814 | 0.615324 | 260.5 |
| Traf6    | 0.664388 | 0.380568 | 0.685246 | 430.5 |
| Tppp     | 8.34495  | 12.2558  | 12.6285  | 424.5 |
| Tpmt     | 6.07381  | 3.59639  | 2.4613   | 338.5 |
| Tpd52    | 3.00664  | 1.72865  | 4.01321  | 335.5 |
| Tom1l2   | 17.9023  | 15.6599  | 19.3904  | 434   |
| Tollip   | 20.577   | 10.7322  | 10.5216  | 414.5 |
| Tmod3    | 26.4136  | 16.4706  | 17.5004  | 331   |
| Tmf1     | 2.95527  | 1.72865  | 1.64319  | 664.5 |
| Tmem87b  | 5.58308  | 6.45983  | 6.38337  | 331.5 |
| Tmem71   | 0.591053 | 0.708814 | 0        | 338.5 |
| Tmem263  | 1.7512   | 0.761137 | 0.957947 | 423   |
| Tmem164  | 3.87851  | 1.46995  | 1.57327  | 347.5 |
| Tmem151b | 4.63011  | 2.02899  | 2.25852  | 416.5 |
| Tmem151a | 2.34225  | 0        | 1.30057  | 267.5 |
| Tlk2     | 0.332194 | 2.17876  | 0.342623 | 502   |
| Tia1     | 25.8026  | 17.2753  | 27.2065  | 509.5 |
| Tgoln1   | 47.0314  | 41.2857  | 50.1546  | 346   |
| Tfap2b   | 5.05852  | 2.17876  | 1.57327  | 342.5 |
| Tfam     | 8.66883  | 5.95312  | 3.81043  | 510   |
| Tef      | 2.51088  | 6.41442  | 9.78224  | 269   |
| Tdrp     | 1.05163  | 0.708814 | 0        | 339.5 |
| Tctn1    | 0        | 1.41763  | 0.342623 | 265.5 |
| Tcf7l2   | 33.201   | 10.9358  | 9.56995  | 270   |
| Tbl2     | 0.996582 | 2.08131  | 0.615324 | 418.5 |
| Tbkbp1   | 3.74803  | 2.81803  | 2.33572  | 431.5 |
| Szrd1    | 14.2238  | 6.12225  | 8.61053  | 418.5 |
| Sytl5    | 4.59795  | 3.54407  | 5.06243  | 419.5 |
| Sytl4    | 0        | 1.08938  | 0.615324 | 505   |
| Syt7     | 18.2394  | 7.71621  | 14.215   | 339.5 |
| Syt6     | 2.30707  | 2.17876  | 0.685246 | 339.5 |

|          |          |          |          |       |
|----------|----------|----------|----------|-------|
| Syne3    | 0.923247 | 0.708814 | 0        | 332.5 |
| Sugt1    | 60.1904  | 42.1153  | 45.3223  | 345   |
| Stxbp4   | 5.24006  | 1.08938  | 3.00358  | 344.5 |
| Stk24    | 0.664388 | 0.708814 | 0        | 265   |
| Stk16    | 2.08339  | 1.08938  | 0.957947 | 342.5 |
| Ssfa2    | 2.95527  | 0.380568 | 1.37049  | 272   |
| Srr      | 44.167   | 29.062   | 23.3137  | 332   |
| Srgap2   | 17.8084  | 12.5115  | 9.65913  | 337   |
| Spon1    | 10.6903  | 7.30909  | 3.97891  | 342   |
| Spag9    | 116.629  | 75.7723  | 102.601  | 501.5 |
| Snx30    | 0.996582 | 0        | 0.615324 | 346.5 |
| Sntg1    | 0.591053 | 0        | 0.615324 | 336.5 |
| Snhg11   | 59.6379  | 49.5254  | 58.1647  | 774   |
| Snap91   | 7.64274  | 3.21582  | 5.97201  | 188.5 |
| Sms      | 2.08339  | 4.61623  | 2.25852  | 342   |
| Smim13   | 1.7512   | 3.54407  | 0.957947 | 499   |
| Smg5     | 4.16408  | 3.73925  | 3.52289  | 260.5 |
| Smg1     | 2.10535  | 2.12644  | 1.64319  | 334   |
| Smad5    | 12.8437  | 6.89625  | 0.685246 | 340   |
| Slx1b    | 0        | 1.08938  | 2.59721  | 333.5 |
| Slc7a1   | 6.01492  | 0        | 1.82461  | 497   |
| Slc6a6   | 0.591053 | 1.46995  | 1.30057  | 429   |
| Slc5a7   | 0.591053 | 0.380568 | 0.615324 | 438.5 |
| Slc39a14 | 2.36421  | 1.41763  | 1.57327  | 190   |
| Slc36a1  | 1.16015  | 0.708814 | 0.615324 | 413   |
| Slc35d1  | 8.54728  | 2.34001  | 4.27728  | 515.5 |
| Slc35a5  | 5.0167   | 8.53928  | 5.78141  | 487   |
| Slc30a9  | 0.591053 | 0.708814 | 0        | 337.5 |
| Slc30a10 | 0.923247 | 0.708814 | 0.342623 | 499.5 |
| Slc25a37 | 2.10535  | 2.12644  | 1.91589  | 343.5 |
| Slc25a36 | 1.5143   | 2.83525  | 0.866667 | 258   |
| Slc25a10 | 0        | 0        | 1.23065  | 346.5 |
| Slc22a23 | 0        | 0        | 0.615324 | 345   |
| Slc16a1  | 2.39637  | 1.08938  | 3.90899  | 347.5 |
| Slc14a1  | 3.74803  | 1.41763  | 2.80392  | 413   |
| Shc4     | 0.591053 | 0        | 0.615324 | 407   |
| Sh3glb1  | 6.03524  | 3.64871  | 5.65526  | 495.5 |
| Sgms2    | 0        | 0        | 0.957947 | 328   |
| Sgcb     | 3.79941  | 3.31356  | 1.79032  | 429   |
| Sfxn2    | 1.5143   | 1.4004   | 1.57327  | 329.5 |
| Sfmbt2   | 2.69641  | 3.11837  | 0.957947 | 336   |
| Sfmbt1   | 0.591053 | 0.761137 | 2.53122  | 427.5 |
| Sertad2  | 2.17869  | 0        | 1.30057  | 503.5 |
| Senp8    | 1.18211  | 2.12644  | 1.23065  | 341.5 |
| Sema3e   | 1.26596  | 0.708814 | 1.91589  | 339   |
| Sema3d   | 3.03972  | 2.7378   | 4.03457  | 420   |
| Sec63    | 3.19216  | 1.46995  | 0.957947 | 504   |

|           |          |          |          |        |
|-----------|----------|----------|----------|--------|
| Sec14l1   | 9.01814  | 6.84976  | 9.66399  | 430.5  |
| Sdad1     | 4.61414  | 2.89002  | 4.16033  | 338.5  |
| Scn9a     | 3.0286   | 2.02899  | 1.23065  | 416    |
| Scn2b     | 59.4223  | 74.8425  | 93.6466  | 502    |
| Scn1a     | 10.4888  | 11.4383  | 15.459   | 344    |
| Scin      | 0.332194 | 0.708814 | 0        | 514    |
| Scfd2     | 0.923247 | 1.7982   | 0.342623 | 259.5  |
| Sbf2      | 1.18211  | 0.761137 | 0.615324 | 346.5  |
| Sash1     | 1.5143   | 2.88758  | 2.33572  | 1057.5 |
| Runx1     | 0        | 0.380568 | 0.615324 | 595    |
| Rprd1b    | 2.17869  | 0.708814 | 0.615324 | 334    |
| Rnpc3     | 6.56915  | 5.06634  | 5.48226  | 344.5  |
| Rnf38     | 2.10535  | 1.08938  | 0.957947 | 258    |
| Ric3      | 11.4434  | 6.20113  | 12.4048  | 507.5  |
| Rhbdd2    | 0.827951 | 3.72203  | 2.40564  | 336    |
| Rgp1      | 1.84649  | 1.7982   | 1.57327  | 406.5  |
| Rfxank    | 2.36421  | 2.10922  | 3.44079  | 340.5  |
| Reps2     | 1.58764  | 1.7982   | 1.91589  | 506    |
| Reep1     | 11.9596  | 9.78008  | 3.28392  | 344.5  |
| Rdh13     | 1.18211  | 1.08938  | 1.64319  | 337.5  |
| Rbfox2    | 78.546   | 55.8001  | 45.1684  | 360    |
| Rbbp6     | 13.2529  | 10.6745  | 10.921   | 337    |
| Rapgef4   | 16.023   | 14.5468  | 23.6392  | 348    |
| Rapgef3   | 0.591053 | 0        | 0.615324 | 417    |
| Rap2b     | 1.64268  | 0.708814 | 0.342623 | 441    |
| Ralgapa2  | 1.5143   | 1.08938  | 1.30057  | 425    |
| Ralgapa1  | 0        | 0        | 0.615324 | 349.5  |
| Rag1      | 3.61755  | 0.380568 | 1.23065  | 505    |
| Rad54l2   | 0.591053 | 1.46995  | 1.23065  | 431    |
| Rad1      | 0.923247 | 1.85052  | 2.4613   | 256    |
| Rabep1    | 2.67445  | 1.41763  | 0        | 337.5  |
| Rab9b     | 7.12418  | 8.08422  | 11.0202  | 350.5  |
| Rab6a     | 2.10535  | 2.17876  | 1.37049  | 262.5  |
| Rab2b     | 15.5298  | 14.0516  | 10.3053  | 266    |
| Rab26     | 1.25544  | 0.380568 | 1.30057  | 178    |
| Rab11fip2 | 16.6924  | 11.1812  | 13.0832  | 421    |
| R3hcc1l   | 4.51884  | 4.92725  | 4.55861  | 341.5  |
| Ptrhd1    | 5.41716  | 7.8898   | 6.11417  | 424.5  |
| Ptpa      | 1.25544  | 0.380568 | 0.957947 | 343    |
| Pter      | 0.591053 | 0.761137 | 1.91589  | 424    |
| Ptchd2    | 0.332194 | 0.380568 | 0.615324 | 272    |
| Ptchd1    | 0        | 2.17876  | 1.84597  | 427.5  |
| Prtg      | 0        | 0.708814 | 0        | 582    |
| Prrt2     | 35.1437  | 23.6938  | 27.6531  | 345    |
| Prrg1     | 4.8751   | 0.380568 | 2.16724  | 422    |
| Pros1     | 0.591053 | 2.10922  | 1.77293  | 417.5  |
| Prokr2    | 4.7798   | 3.85509  | 0        | 349.5  |

|            |          |          |          |       |
|------------|----------|----------|----------|-------|
| Prkg2      | 0        | 0.380568 | 0.615324 | 264   |
| Prkci      | 3.07997  | 0.708814 | 5.98419  | 334.5 |
| Prex1      | 0.332194 | 0        | 1.4477   | 268   |
| Prdm2      | 5.08793  | 2.17876  | 3.90171  | 511.5 |
| Prdm15     | 2.43755  | 1.41763  | 3.74051  | 341.5 |
| Pptc7      | 0.332194 | 0.708814 | 2.01955  | 520   |
| Ppp2r5e    | 0.664388 | 0.708814 | 0.342623 | 334.5 |
| Ppp2r2c    | 9.51935  | 5.24481  | 4.89339  | 337.5 |
| Ppp2r1b    | 2.73908  | 1.14171  | 0.342623 | 407   |
| Ppp1r3a    | 0.827951 | 0.708814 | 0        | 350   |
| Ppp1r16b   | 0.332194 | 1.01984  | 2.25852  | 341   |
| Ppm1h      | 1.05163  | 0        | 0.615324 | 412.5 |
| Ppm1e      | 5.13396  | 2.17876  | 2.25852  | 426   |
| Ppil3      | 7.55321  | 5.01402  | 6.49586  | 517   |
| Ppih       | 4.60814  | 2.02899  | 1.94962  | 340   |
| Polr3h     | 4.72843  | 1.46995  | 2.38825  | 420   |
| Pnma2      | 10.648   | 7.34006  | 3.65378  | 420   |
| Pmpca      | 21.3174  | 16.8477  | 11.7492  | 355.5 |
| Plekhm3    | 4.42294  | 2.88758  | 6.31463  | 414   |
| Plekhm1    | 6.43845  | 1.08938  | 2.25852  | 415.5 |
| Plce1      | 0.591053 | 2.12644  | 1.84597  | 337.5 |
| Plagl2     | 0.332194 | 0        | 0.615324 | 336   |
| Pkn2       | 0.591053 | 0.708814 | 0.615324 | 350.5 |
| Pitpnm3    | 0        | 0        | 0.615324 | 348.5 |
| Pin1       | 21.8649  | 14.9535  | 17.0652  | 431   |
| Phtf1os    | 1.77316  | 0.708814 | 0.615324 | 423   |
| Phldb2     | 3.65274  | 0        | 0.957947 | 333   |
| Phf8       | 0.332194 | 0.761137 | 0.957947 | 505   |
| Phf21a     | 15.9335  | 4.30521  | 17.7603  | 338   |
| Phc1       | 0        | 0.708814 | 0.957947 | 340   |
| Pex13      | 4.30865  | 3.14628  | 4.54957  | 345   |
| Pdxk       | 5.03321  | 4.58528  | 6.64604  | 509   |
| Pde6a      | 0        | 0        | 0.615324 | 604.5 |
| Pde4dip    | 40.1331  | 28.2912  | 19.8259  | 260   |
| Pcyox1     | 27.697   | 17.3273  | 27.3257  | 438   |
| Pclo       | 3.23032  | 1.46995  | 4.35583  | 499.5 |
| Pcbp2      | 0        | 0.761137 | 1.02787  | 414   |
| Pate2      | 0        | 0.708814 | 0        | 340.5 |
| Parvb      | 2.5214   | 1.7982   | 0.615324 | 412.5 |
| Pard3      | 1.18211  | 0        | 1.02787  | 269   |
| Pappa2     | 0.923247 | 1.46995  | 0        | 346.5 |
| Papolg     | 38.2876  | 19.3838  | 18.854   | 425   |
| Pak2       | 0.591053 | 2.88758  | 0.957947 | 334.5 |
| Pafah2     | 1.16015  | 1.01984  | 0.957947 | 338   |
| Orc3       | 11.7798  | 7.40635  | 9.77326  | 435   |
| Olfr29-ps1 | 0        | 0.708814 | 0        | 414.5 |
| Ocln       | 3.3608   | 1.41763  | 3.56637  | 348   |



|        |          |          |          |       |
|--------|----------|----------|----------|-------|
| Nxph1  | 6.90712  | 4.9617   | 3.02097  | 332.5 |
| Nutf2  | 29.3267  | 19.4349  | 23.021   | 342   |
| Nudt4  | 5.72501  | 3.4573   | 1.91589  | 416   |
| Nudt13 | 6.14409  | 7.48737  | 6.80438  | 257   |
| Nptx1  | 1.5143   | 1.52227  | 3.28638  | 506   |
| Nol7   | 33.7645  | 25.2016  | 16.0639  | 341.5 |
| Nol4l  | 1.7512   | 0.761137 | 0        | 343.5 |
| Nmt2   | 20.6928  | 10.6569  | 10.6735  | 417   |
| Nmnat2 | 44.9503  | 42.4657  | 36.2672  | 491.5 |
| Nkap   | 4.6845   | 5.9364   | 3.09089  | 327.5 |
| Nifk   | 21.6991  | 14.6886  | 12.3118  | 428   |
| Nfix   | 1.58764  | 0.380568 | 1.57327  | 418.5 |
| Nfic   | 2.43755  | 0.708814 | 1.91589  | 335   |
| Nfatc2 | 0.591053 | 0.380568 | 0.615324 | 328   |
| Neto2  | 5.78005  | 3.21582  | 1.23065  | 346.5 |
| Nedd4  | 124.641  | 82.1603  | 58.4521  | 345   |
| Ndst1  | 3.10194  | 1.41763  | 3.48916  | 490   |
| Ncor1  | 9.06174  | 1.41763  | 9.50974  | 186.5 |
| Ncam2  | 16.6936  | 8.31388  | 11.2663  | 421   |
| Nav2   | 13.9172  | 3.21582  | 7.35151  | 257.5 |
| N4bp1  | 0        | 0        | 0.615324 | 423.5 |
| Myt1   | 15.0396  | 9.76358  | 12.9147  | 337   |
| Myo9a  | 11.8089  | 2.99222  | 1.64319  | 411   |
| Mtus2  | 1.25544  | 2.88758  | 3.39788  | 415   |
| Mttp   | 17.4978  | 9.48428  | 16.5964  | 189.5 |
| Mtif3  | 20.143   | 11.1349  | 13.5987  | 497   |
| Mrpl35 | 27.9293  | 24.2891  | 20.5449  | 429.5 |
| Mroh1  | 1.84649  | 0        | 1.82461  | 353   |
| Mplkip | 7.49817  | 2.50701  | 0.957947 | 263.5 |
| Mob3b  | 2.82479  | 2.88758  | 0.957947 | 424.5 |
| Moap1  | 3.95185  | 2.50701  | 2.25852  | 407.5 |
| Mmp24  | 1.38382  | 0.708814 | 0.957947 | 343.5 |
| Mitf   | 2.10535  | 2.12644  | 1.30057  | 411.5 |
| Mink1  | 3.65181  | 3.26815  | 4.53396  | 337   |
| Mier1  | 26.3994  | 11.6141  | 17.6347  | 507   |
| Mief1  | 10.1459  | 6.25977  | 5.75184  | 427.5 |
| Mfap3l | 14.1443  | 7.19278  | 15.8767  | 426   |
| Mesdc1 | 0.591053 | 0        | 0.957947 | 497   |
| Med22  | 3.0286   | 1.08938  | 3.29367  | 586.5 |
| Med17  | 2.43755  | 1.41763  | 0.957947 | 356.5 |
| Med12l | 3.74803  | 1.52227  | 0.957947 | 431.5 |
| Mdga1  | 0.664388 | 0        | 0.615324 | 332.5 |
| Mcc    | 0.591053 | 0        | 0.615324 | 512.5 |
| Mcat   | 0.591053 | 0        | 0.615324 | 501.5 |
| Mbtd1  | 0.827951 | 1.32017  | 0        | 337   |
| Mbnl2  | 90.2924  | 112.458  | 109.391  | 499   |
| Marcks | 47.8113  | 19.4742  | 7.95593  | 335   |

|           |          |          |          |       |
|-----------|----------|----------|----------|-------|
| March6    | 1.77316  | 2.60827  | 0.615324 | 336   |
| Mapkbp1   | 9.24727  | 3.83787  | 3.76186  | 262.5 |
| Mapk9     | 8.0432   | 5.37045  | 3.12518  | 412   |
| Mapk1ip1l | 7.95664  | 5.60816  | 2.18859  | 419   |
| Mapk1     | 10.4426  | 12.3229  | 6.45315  | 424.5 |
| Mapk10    | 44.4468  | 27.644   | 46.4199  | 338   |
| Map4k2    | 5.39281  | 1.08938  | 3.02097  | 350.5 |
| Map3k7    | 1.419    | 0        | 2.53122  | 254   |
| Maml2     | 3.10194  | 3.21582  | 2.25852  | 336   |
| Malt1     | 0        | 0.708814 | 0        | 339.5 |
| Lztf1l    | 12.475   | 9.03992  | 3.97891  | 264   |
| Lynx1     | 37.7722  | 41.4556  | 43.4281  | 349   |
| Luzp2     | 40.9103  | 34.8206  | 34.5281  | 426   |
| Luzp1     | 14.0239  | 12.4495  | 15.2858  | 343.5 |
| Luc7l     | 22.3005  | 12.8801  | 12.1191  | 425.5 |
| Luc7l3    | 50.5324  | 30.8474  | 41.463   | 342.5 |
| Lrrc61    | 1.5143   | 2.50701  | 1.23065  | 426   |
| Lrp4      | 0.923247 | 0        | 1.57327  | 348.5 |
| Lppr4     | 5.56922  | 4.20775  | 2.53122  | 332.5 |
| Lpgat1    | 1.25544  | 0.708814 | 0        | 342.5 |
| Lnpep     | 14.7129  | 12.9022  | 12.4691  | 423   |
| Lins      | 4.53146  | 2.50701  | 2.16724  | 352.5 |
| Lin54     | 0.591053 | 1.41763  | 1.30057  | 343   |
| Leprot    | 5.51807  | 4.26008  | 4.22753  | 183   |
| Lemd3     | 0.332194 | 0        | 1.4477   | 416.5 |
| Lancl1    | 7.98755  | 3.1986   | 6.05411  | 329.5 |
| Lamp2     | 16.9368  | 10.5793  | 12.2092  | 351   |
| L2hgdh    | 0        | 0        | 1.10507  | 340   |
| Krr1      | 15.4239  | 13.8758  | 16.3637  | 335   |
| Krit1     | 5.64794  | 4.07822  | 6.23743  | 500.5 |
| Krba1     | 6.54993  | 2.17876  | 3.14654  | 505.5 |
| Kpna3     | 15.7608  | 13.8242  | 5.12842  | 411.5 |
| Klhl42    | 1.5143   | 0.708814 | 0.342623 | 421   |
| Klhdc10   | 10.76    | 4.06866  | 5.85918  | 343.5 |
| Klf10     | 11.9034  | 10.246   | 9.82479  | 257.5 |
| Kirrel3   | 17.1973  | 7.90643  | 7.95256  | 345   |
| Kif5a     | 51.4011  | 41.3319  | 79.6581  | 177   |
| Kif2a     | 15.8234  | 7.07811  | 7.73691  | 344   |
| Kdm5c     | 8.95136  | 4.97957  | 3.46781  | 495.5 |
| Kcnv1     | 2.56593  | 2.50701  | 2.53122  | 423.5 |
| Kcnn3     | 1.5143   | 0.708814 | 2.82547  | 332.5 |
| Kcnma1    | 9.19222  | 3.37279  | 5.56512  | 355   |
| Kcnh1     | 0        | 0.708814 | 2.53122  | 261.5 |
| Kcnc4     | 1.84649  | 0.708814 | 0.615324 | 323   |
| Kcnc2     | 13.9164  | 6.89323  | 15.1854  | 495.5 |
| Kcnb2     | 12.7031  | 7.5038   | 8.16061  | 334   |
| Kbtbd8    | 1.84649  | 0.708814 | 0        | 335.5 |

|           |          |          |          |       |
|-----------|----------|----------|----------|-------|
| Kbtbd11   | 5.59453  | 3.59639  | 3.83179  | 289   |
| Jup       | 0.591053 | 0.380568 | 0.615324 | 259.5 |
| Jrk       | 0.591053 | 1.01984  | 0.957947 | 505   |
| Josd1     | 0        | 0        | 0.957947 | 339.5 |
| Jade2     | 0.591053 | 0        | 3.48916  | 417.5 |
| Itga8     | 0.591053 | 0.708814 | 1.30057  | 347   |
| Iqsec3    | 0.591053 | 0.708814 | 0        | 345.5 |
| Inpp4a    | 10.6755  | 6.15572  | 13.556   | 261.5 |
| Impad1    | 4.5429   | 0        | 0.615324 | 417   |
| Ikzf5     | 15.6124  | 10.1904  | 11.2873  | 742.5 |
| Ikbnkg    | 7.40217  | 5.40084  | 7.60554  | 412   |
| Ikbnkap   | 10.6333  | 7.82463  | 4.84558  | 267.5 |
| Ifitm10   | 0.591053 | 2.40956  | 6.51429  | 251   |
| Ick       | 5.98387  | 2.50701  | 3.99185  | 178.5 |
| Htr1a     | 10.4865  | 4.96889  | 9.78641  | 421   |
| Hspa14    | 38.2413  | 27.5511  | 27.8754  | 431   |
| Hsd17b7   | 10.9306  | 7.51829  | 4.76719  | 431   |
| Hmgcll1   | 3.0286   | 2.50701  | 1.84597  | 424.5 |
| Hist2h2be | 6.5213   | 1.08938  | 2.80757  | 251   |
| Hist1h2be | 11.934   | 7.07091  | 5.60784  | 428   |
| Hhat      | 0.591053 | 0        | 0.615324 | 724.5 |
| Heyl      | 0.923247 | 1.08938  | 0.342623 | 352.5 |
| Hcn1      | 0        | 0.380568 | 0.957947 | 590.5 |
| Haus2     | 10.5013  | 6.88035  | 7.93441  | 431   |
| Gtpbp10   | 2.01006  | 4.15543  | 1.57327  | 348   |
| Gtf3c4    | 0.591053 | 0        | 1.48199  | 426.5 |
| Gtf3c2    | 2.93331  | 1.41763  | 1.91589  | 179   |
| Grin2b    | 68.3694  | 37.4646  | 39.6996  | 257.5 |
| Grem2     | 1.419    | 0.708814 | 0.615324 | 336.5 |
| Gpr61     | 8.48476  | 12.7428  | 8.32056  | 336.5 |
| Gpr158    | 8.38046  | 8.13239  | 7.72397  | 333.5 |
| Gpr116    | 5.39071  | 3.21582  | 2.53122  | 491.5 |
| Gpd1l     | 3.61965  | 7.5038   | 4.52432  | 333.5 |
| Gosr1     | 10.1007  | 6.63755  | 9.79059  | 360   |
| Gopc      | 6.3894   | 0.708814 | 3.28638  | 344   |
| Golph3l   | 11.3093  | 4.25288  | 6.35348  | 343.5 |
| Gnb4      | 6.3813   | 3.21582  | 0.685246 | 490   |
| Gnaq      | 6.14105  | 1.7982   | 5.60784  | 430.5 |
| Gmps      | 59.4907  | 47.4194  | 55.6483  | 413.5 |
| Gm6194    | 1.84649  | 1.41763  | 1.23065  | 350   |
| Gm2a      | 49.3614  | 30.3658  | 21.1447  | 501   |
| Gm20604   | 7.20677  | 2.88758  | 7.28279  | 342   |
| Gm20125   | 0.332194 | 0.708814 | 0        | 266   |
| Gm19757   | 1.58764  | 0        | 1.64319  | 341.5 |
| Gm15941   | 1.18211  | 1.41763  | 0        | 337.5 |
| Gm10778   | 2.80283  | 2.79012  | 3.48916  | 425   |
| Gm10408   | 0.332194 | 0        | 0.957947 | 744   |

|          |          |          |          |       |
|----------|----------|----------|----------|-------|
| Gm10390  | 0        | 0.708814 | 0        | 338.5 |
| Gltscr1l | 0.332194 | 0        | 0.685246 | 334   |
| Glce     | 17.5923  | 13.0941  | 11.3965  | 342   |
| Gfpt1    | 32.2866  | 16.298   | 21.4605  | 496.5 |
| Gfod1    | 0.591053 | 0.708814 | 1.30057  | 437   |
| Gemin5   | 1.97487  | 2.88758  | 1.57327  | 337.5 |
| Gcnt2    | 13.3401  | 9.40326  | 8.8243   | 337   |
| Gbp9     | 0.923247 | 1.08938  | 4.42456  | 342.5 |
| Gbp7     | 1.97487  | 0.708814 | 0.615324 | 339   |
| Galnt6   | 1.25544  | 0        | 1.73333  | 351   |
| Galnt4   | 1.5143   | 0.708814 | 0.615324 | 774   |
| Galnt16  | 5.62971  | 1.41763  | 2.33572  | 429   |
| Gabrg2   | 78.5848  | 65.0395  | 57.0601  | 419   |
| Gabra1   | 13.5097  | 7.07091  | 8.42483  | 405.5 |
| Frmpd4   | 13.6371  | 8.16029  | 12.997   | 335   |
| Frmd7    | 3.15698  | 0        | 1.23065  | 344   |
| Foxp2    | 17.6826  | 4.28798  | 7.75827  | 423.5 |
| Fndc3b   | 1.25544  | 0.708814 | 1.57327  | 422.5 |
| Fmod     | 3.82137  | 2.83525  | 2.01955  | 340.5 |
| Fhl1     | 6.90501  | 4.88096  | 4.03457  | 183   |
| Fgd6     | 1.5143   | 2.50701  | 0.957947 | 418   |
| Fgd5     | 3.74803  | 1.7982   | 2.4613   | 260.5 |
| Fech     | 7.73086  | 4.89934  | 5.06608  | 523   |
| Fdx1     | 0        | 0        | 0.615324 | 423   |
| Fbxw8    | 0.591053 | 0        | 1.30057  | 418.5 |
| Fbxo8    | 3.39388  | 3.97696  | 1.57327  | 339   |
| Fbxo45   | 1.25544  | 3.72973  | 0.615324 | 420.5 |
| Fbxo28   | 0        | 0        | 0.957947 | 350.5 |
| Fam73a   | 6.50968  | 4.35753  | 2.16724  | 370   |
| Fam60a   | 2.43755  | 0.708814 | 0        | 266.5 |
| Fam49a   | 72.2646  | 46.8882  | 30.4324  | 342   |
| Fam227a  | 3.0286   | 1.46995  | 0.957947 | 429   |
| Fam178a  | 20.0883  | 15.5065  | 16.7801  | 419.5 |
| Faim2    | 6.87584  | 9.96961  | 12.4295  | 330   |
| Exog     | 7.3253   | 4.61867  | 2.90757  | 335   |
| Etv6     | 1.58764  | 2.81803  | 3.02097  | 257.5 |
| Etv3     | 1.87958  | 2.23109  | 4.50296  | 345   |
| Erlec1   | 8.77795  | 11.9291  | 9.75261  | 418.5 |
| Eri1     | 1.77316  | 0.708814 | 0.615324 | 495.5 |
| Epas1    | 4.2726   | 2.10922  | 2.67834  | 510   |
| Eny2     | 16.6724  | 12.5245  | 14.2385  | 409   |
| Enpp4    | 0.996582 | 3.54407  | 2.16724  | 577   |
| Emx2os   | 1.5143   | 0.708814 | 0.685246 | 527.5 |
| Elovl5   | 13.6783  | 7.48923  | 8.86334  | 254.5 |
| Elavl3   | 1.18211  | 0.708814 | 0.615324 | 409.5 |
| Eif5b    | 40.8181  | 27.1785  | 38.7623  | 514.5 |
| Eif5     | 1.58764  | 0.380568 | 0.957947 | 504   |

|             |          |          |          |       |
|-------------|----------|----------|----------|-------|
| Eif1ad      | 14.5076  | 7.52518  | 7.31702  | 334.5 |
| Egr3        | 2.43755  | 0.380568 | 2.32844  | 259   |
| Efr3b       | 2.01006  | 1.14171  | 4.36038  | 494   |
| Efr3a       | 1.5143   | 2.55933  | 5.70286  | 582   |
| Efna5       | 2.01006  | 0.380568 | 0.957947 | 340   |
| Edem3       | 1.5143   | 0.761137 | 0        | 347   |
| Ebf1        | 13.1537  | 7.4687   | 5.20956  | 499.5 |
| E2f3        | 0.923247 | 0.708814 | 2.25852  | 262.5 |
| Dzip1l      | 1.18211  | 0.708814 | 0.615324 | 349.5 |
| Dzank1      | 31.2073  | 27.5227  | 38.3356  | 258.5 |
| Dusp22      | 2.51088  | 0.380568 | 2.53122  | 343.5 |
| Dtna        | 68.3619  | 45.9102  | 57.4652  | 414   |
| Dpysl5      | 12.251   | 6.26465  | 0.685246 | 343   |
| Dnmt3a      | 4.68957  | 3.97696  | 0.957947 | 344   |
| Dnajc5      | 15.1692  | 9.72032  | 8.01823  | 416.5 |
| Dnajc18     | 36.6237  | 29.0549  | 26.2294  | 652.5 |
| Dnaja2      | 26.2971  | 17.0258  | 21.7411  | 341   |
| Dmxl1       | 0.591053 | 0.708814 | 2.25852  | 343   |
| Dlx6os1     | 25.8338  | 15.7253  | 28.865   | 335   |
| Dip2b       | 3.95185  | 4.86424  | 4.99251  | 340.5 |
| Dhx33       | 1.5143   | 0.708814 | 0.957947 | 338   |
| Dgkb        | 46.318   | 35.3689  | 72.7496  | 425.5 |
| Dgcr2       | 2.51088  | 1.72865  | 3.05526  | 344.5 |
| Dennd6b     | 1.77316  | 0        | 1.7204   | 346   |
| Dennd4c     | 4.28194  | 0.761137 | 0.615324 | 426.5 |
| Dennd2d     | 0        | 0        | 0.615324 | 331   |
| Ddx6        | 33.4148  | 22.2975  | 21.8408  | 265   |
| Ddx51       | 2.10535  | 1.46995  | 0.957947 | 417.5 |
| Ddit4l      | 0.332194 | 1.46995  | 3.90899  | 421   |
| Ddah1       | 1.77316  | 3.59639  | 0.957947 | 429   |
| Dcp1a       | 10.9553  | 2.73292  | 5.33878  | 340   |
| Dck         | 1.5143   | 1.7982   | 0.685246 | 414.5 |
| Dcdc2a      | 0.664388 | 1.08938  | 0.957947 | 342.5 |
| D16Ertd472e | 0.332194 | 0.708814 | 3.14654  | 333.5 |
| Cyth4       | 6.99734  | 6.63383  | 3.00358  | 333.5 |
| Cycs        | 72.2381  | 76.9072  | 55.0193  | 345   |
| Cyb5b       | 15.9251  | 11.9996  | 10.959   | 335.5 |
| Cyb561d1    | 0.591053 | 0.380568 | 2.09731  | 428.5 |
| Ctif        | 0        | 0.708814 | 0        | 341.5 |
| Csnk1g1     | 9.38552  | 6.64521  | 6.57759  | 502   |
| Csm1        | 6.07107  | 7.14765  | 3.70621  | 341   |
| Crybg3      | 7.77322  | 2.50701  | 4.03457  | 256.5 |
| Crnk1       | 9.55804  | 8.48679  | 8.71625  | 337   |
| Crkl        | 0.332194 | 2.17876  | 1.30057  | 335   |
| Creg2       | 0        | 0.708814 | 0.957947 | 429   |
| Cpsf2       | 8.1309   | 2.48979  | 2.23716  | 343   |
| Cpox        | 0.827951 | 0        | 1.30057  | 601.5 |

|               |          |          |          |       |
|---------------|----------|----------|----------|-------|
| Cpne4         | 2.43755  | 0.708814 | 3.05526  | 509.5 |
| Cplx2         | 235.641  | 179.418  | 197.896  | 1114  |
| Cpeb4         | 8.38887  | 4.68577  | 9.82494  | 423   |
| Cpd           | 1.25544  | 0.380568 | 0.615324 | 506   |
| Col8a1        | 2.93331  | 1.70074  | 1.94962  | 430.5 |
| Cobl          | 1.5143   | 0.708814 | 2.4613   | 334.5 |
| Cntnap2       | 49.6758  | 31.3263  | 30.655   | 333.5 |
| Cnksr2        | 9.78531  | 5.06634  | 7.28164  | 268   |
| Cln8          | 0.923247 | 0.380568 | 0.957947 | 427   |
| Clec5a        | 0.332194 | 0        | 1.23065  | 502.5 |
| Cisd2         | 9.34056  | 9.71428  | 8.06051  | 586.5 |
| Chtf8         | 3.11245  | 2.28341  | 3.50154  | 414.5 |
| Chrna4        | 2.36421  | 1.46995  | 2.60114  | 333.5 |
| Chrm1         | 4.88561  | 2.83525  | 2.80392  | 340   |
| Chm           | 27.7324  | 19.6816  | 19.6243  | 264   |
| Chl1          | 104.128  | 40.9464  | 37.0309  | 343   |
| Chdh          | 0        | 0        | 1.30057  | 336.5 |
| Chd9          | 4.35231  | 5.52023  | 3.48916  | 343   |
| Chd6          | 73.6653  | 46.6095  | 52.8     | 352.5 |
| Chd2          | 45.2888  | 30.4413  | 37.5676  | 440.5 |
| Champ1        | 1.58764  | 2.64035  | 0.685246 | 262   |
| Cgn           | 2.10535  | 1.08938  | 0        | 415.5 |
| Cflar         | 7.25043  | 3.59639  | 5.04108  | 335   |
| Cers1         | 0.332194 | 0.708814 | 0        | 411   |
| Cerk          | 1.84649  | 0.708814 | 0.685246 | 424   |
| Cenpo         | 2.89812  | 1.7982   | 2.18859  | 337   |
| Cenpf         | 17.2082  | 1.08938  | 0.615324 | 343.5 |
| Cdip1         | 18.2248  | 17.5134  | 21.9618  | 263   |
| Cdc42se2      | 55.4673  | 41.9675  | 33.5842  | 429.5 |
| Cd2bp2        | 12.3195  | 5.22759  | 9.70845  | 344.5 |
| Ccnj          | 0.591053 | 0        | 0.615324 | 413   |
| Ccdc93        | 9.28245  | 1.41763  | 5.73361  | 491.5 |
| Ccdc85a       | 8.54396  | 3.97696  | 2.4613   | 349.5 |
| Ccdc6         | 0.591053 | 1.85052  | 1.30057  | 276   |
| Ccdc167       | 9.24067  | 5.77896  | 7.49844  | 346   |
| Cbx4          | 1.58764  | 0.380568 | 2.25852  | 269   |
| Casp9         | 0.591053 | 1.85052  | 1.30057  | 424.5 |
| Casp2         | 1.77316  | 2.17876  | 0.615324 | 497.5 |
| Car5b         | 0        | 0.708814 | 2.33572  | 422.5 |
| Capza1        | 9.95497  | 5.7584   | 9.43016  | 345.5 |
| Cacfd1        | 0.923247 | 2.17876  | 0.615324 | 346.5 |
| C330018D20Rik | 2.17869  | 0.708814 | 0.685246 | 328.5 |
| Btf3l4        | 38.5538  | 35.6499  | 29.2165  | 347   |
| Brip1         | 1.5143   | 2.17876  | 0        | 349.5 |
| Bmpr1b        | 17.2922  | 10.7407  | 16.5464  | 424   |
| Bmi1          | 5.42497  | 2.08131  | 4.17806  | 342.5 |
| Bcl2l11       | 2.93331  | 1.72865  | 1.30057  | 347   |

|          |          |          |          |       |
|----------|----------|----------|----------|-------|
| BC031361 | 0        | 0.708814 | 0        | 350.5 |
| BC030336 | 2.60111  | 3.21582  | 1.23065  | 346.5 |
| Bahcc1   | 1.7512   | 0        | 1.23065  | 338.5 |
| B3glct   | 16.0274  | 3.64871  | 4.90267  | 256   |
| B3galt1  | 1.5143   | 0.708814 | 0.615324 | 358.5 |
| Atxn7l3  | 0        | 0.708814 | 0.957947 | 347   |
| Atxn7    | 0        | 0.708814 | 0.342623 | 425   |
| Atp6v1a  | 30.2011  | 21.7246  | 17.6705  | 341   |
| Atp11c   | 6.54238  | 3.4573   | 3.81498  | 343   |
| Atmin    | 0.591053 | 0.380568 | 0.957947 | 181.5 |
| Atl2     | 29.5986  | 23.1677  | 24.4393  | 345   |
| Atg2b    | 1.5143   | 1.08938  | 0.342623 | 336   |
| Atg16l1  | 3.74803  | 4.30521  | 4.10449  | 260   |
| Ate1     | 55.201   | 37.2194  | 56.125   | 335   |
| Astn1    | 39.8986  | 23.7493  | 25.7229  | 420   |
| Asb15    | 0.591053 | 0.380568 | 0.615324 | 417   |
| Arpp21   | 233.657  | 181.704  | 145.517  | 411.5 |
| Arpp19   | 30.8018  | 16.6489  | 18.998   | 501.5 |
| Arntl2   | 0.591053 | 0.708814 | 0.615324 | 361.5 |
| Arl14ep  | 14.2949  | 7.07811  | 14.2758  | 435   |
| Arid3b   | 0.591053 | 0.380568 | 0.615324 | 419.5 |
| Arid2    | 7.69988  | 4.25288  | 4.03457  | 590   |
| Arhgef7  | 5.39281  | 9.27106  | 3.92193  | 428   |
| Arhgap31 | 4.41242  | 4.20775  | 0.685246 | 337   |
| Arfp2    | 4.7777   | 2.84245  | 2.95104  | 266.5 |
| Arf4     | 32.6875  | 23.9898  | 19.0201  | 332   |
| Arf3     | 7.99229  | 10.5342  | 3.93544  | 333   |
| Appl1    | 33.3177  | 14.0048  | 19.9841  | 423   |
| Apc      | 8.88199  | 4.92725  | 0.685246 | 431   |
| Apc2     | 23.7873  | 8.89597  | 4.01321  | 423.5 |
| Apba1    | 3.0286   | 0.761137 | 0.342623 | 262   |
| Ap5m1    | 8.82274  | 2.50701  | 3.46781  | 260   |
| Ap4e1    | 11.5654  | 4.91657  | 8.02193  | 264   |
| Ap2b1    | 22.6751  | 13.5132  | 14.0901  | 339   |
| Ano6     | 35.4427  | 15.6717  | 23.7799  | 339   |
| Ankrd29  | 2.56593  | 3.82718  | 1.82461  | 421   |
| Ankrd10  | 0.996582 | 0        | 0.615324 | 345.5 |
| Ankle2   | 1.5143   | 0        | 1.30057  | 272.5 |
| Alx4     | 3.54632  | 1.08938  | 1.30057  | 414.5 |
| Alkbh5   | 0        | 1.41763  | 0.685246 | 345   |
| Alg11    | 22.0163  | 17.201   | 21.7004  | 427.5 |
| Aldh1l2  | 0.591053 | 0        | 1.23065  | 345.5 |
| Akap13   | 0        | 0        | 1.30057  | 413   |
| Ak4      | 1.25544  | 0.708814 | 1.64319  | 411   |
| Ahcyl2   | 5.85339  | 1.08938  | 4.10449  | 427   |
| Ago3     | 4.98151  | 2.81803  | 4.99251  | 343.5 |
| Ago1     | 0.332194 | 0.708814 | 0        | 413   |

|               |          |          |          |       |
|---------------|----------|----------|----------|-------|
| Agl           | 8.31065  | 2.98884  | 6.11545  | 509   |
| Aff3          | 0.332194 | 0.761137 | 1.30057  | 335.5 |
| Aff1          | 1.5143   | 0.380568 | 1.91589  | 498.5 |
| Afap1         | 8.13849  | 4.94447  | 0.342623 | 582   |
| Adora1        | 1.25544  | 2.17876  | 2.25852  | 429.5 |
| Adcy9         | 0        | 0        | 0.957947 | 419   |
| Adam19        | 9.75922  | 10.1323  | 2.71264  | 345   |
| Acvr2a        | 2.69641  | 1.46995  | 1.57327  | 429   |
| Abt1          | 8.43803  | 3.17069  | 1.91589  | 347   |
| Abcc9         | 0.923247 | 1.7982   | 0.957947 | 414.5 |
| A730017L22Rik | 13.0067  | 3.21582  | 6.47394  | 256   |
| A530054K11Rik | 8.32067  | 7.74909  | 8.01713  | 339.5 |
| A330050F15Rik | 0.923247 | 0        | 0.615324 | 260   |
| A330049N07Rik | 0        | 0.708814 | 5.35224  | 506.5 |
| 6330403A02Rik | 0.591053 | 0.380568 | 0.615324 | 522   |
| 5530601H04Rik | 6.47962  | 6.46336  | 6.1507   | 345.5 |
| 4930525G20Rik | 0        | 0        | 0.615324 | 341   |
| 3110052M02Rik | 4.80176  | 2.88758  | 5.4609   | 504   |
| 2700054A10Rik | 1.25544  | 1.41763  | 0.615324 | 342   |
| 2610005L07Rik | 38.4651  | 32.1171  | 31.9493  | 336.5 |
| 1810041L15Rik | 4.20861  | 2.17876  | 1.57327  | 587   |
| 1810026B05Rik | 0.591053 | 1.7982   | 2.53122  | 420   |
| 1810013L24Rik | 7.8084   | 2.88758  | 4.17441  | 520   |
| 1110002L01Rik | 3.3608   | 4.25288  | 4.30727  | 332.5 |
| Zswim4        | 0.332194 | 1.08938  | 0.615324 | 346   |
| Zscan22       | 1.5143   | 2.37395  | 2.40564  | 330   |
| Zscan12       | 2.69641  | 0        | 0.615324 | 499   |
| Zranb2        | 216.94   | 160.142  | 179.588  | 510   |
| Znrf1         | 5.18533  | 9.43534  | 5.878    | 334   |
| Zmynd8        | 17.4691  | 14.8946  | 17.8787  | 347   |
| Zmpste24      | 24.5045  | 18.766   | 18.0727  | 335   |
| Zkscan1       | 26.206   | 16.5438  | 13.4086  | 500   |
| Zik1          | 6.78715  | 3.90741  | 3.47236  | 335   |
| Zic4          | 11.0144  | 3.21582  | 0.342623 | 174   |
| Zgrf1         | 2.10535  | 0.708814 | 0.615324 | 341   |
| Zfyve27       | 1.5143   | 0        | 1.23065  | 341   |
| Zfpm2         | 3.61965  | 1.46995  | 1.57327  | 358   |
| Zfp961        | 4.7798   | 3.80996  | 3.29367  | 343   |
| Zfp938        | 19.3916  | 13.3379  | 14.2751  | 179   |
| Zfp91Cntf     | 0        | 0.708814 | 0.342623 | 331   |
| Zfp91         | 0        | 0.708814 | 0.342623 | 340   |
| Zfp874b       | 6.09029  | 4.22447  | 5.99902  | 335   |
| Zfp874a       | 4.05827  | 5.83895  | 5.33513  | 359   |
| Zfp870        | 7.30844  | 1.41763  | 5.20956  | 368   |
| Zfp830        | 10.6788  | 10.6197  | 3.76186  | 337   |
| Zfp827        | 11.1256  | 9.60183  | 5.89481  | 348   |
| Zfp800        | 1.7512   | 0.380568 | 2.53122  | 1028  |



|          |          |          |          |     |
|----------|----------|----------|----------|-----|
| Zfp784   | 2.69641  | 0.708814 | 2.18859  | 342 |
| Zfp763   | 6.73546  | 1.85052  | 3.76186  | 337 |
| Zfp747   | 0        | 0.761137 | 0.615324 | 343 |
| Zfp746   | 0.591053 | 0        | 0.615324 | 492 |
| Zfp709   | 5.03866  | 4.63345  | 6.32681  | 178 |
| Zfp703   | 1.71601  | 1.01984  | 1.10507  | 336 |
| Zfp697   | 4.28404  | 3.97696  | 2.18859  | 497 |
| Zfp654   | 17.497   | 6.71476  | 17.2349  | 508 |
| Zfp652   | 30.1032  | 23.5997  | 28.4715  | 347 |
| Zfp644   | 3.98401  | 1.7982   | 4.59424  | 170 |
| Zfp619   | 3.88964  | 1.4004   | 1.91589  | 330 |
| Zfp612   | 5.41952  | 4.91657  | 6.39357  | 340 |
| Zfp609   | 0.923247 | 0.761137 | 0.342623 | 341 |
| Zfp599   | 1.18211  | 1.08938  | 0.342623 | 345 |
| Zfp595   | 2.23373  | 1.70074  | 1.10507  | 341 |
| Zfp593   | 0.332194 | 0        | 0.615324 | 179 |
| Zfp58    | 9.39797  | 6.56499  | 3.50154  | 348 |
| Zfp575   | 0.332194 | 0        | 0.957947 | 527 |
| Zfp54    | 2.23373  | 1.01984  | 1.84597  | 194 |
| Zfp532   | 0        | 1.46995  | 0.615324 | 345 |
| Zfp516   | 0.664388 | 1.41763  | 0.615324 | 348 |
| Zfp512   | 38.971   | 24.1436  | 23.7585  | 340 |
| Zfp467   | 1.91983  | 2.88758  | 1.55647  | 338 |
| Zfp458   | 3.71759  | 2.9399   | 5.71149  | 329 |
| Zfp445   | 12.3935  | 8.50906  | 12.3909  | 337 |
| Zfp444   | 3.31962  | 0.708814 | 0.615324 | 498 |
| Zfp397   | 9.29719  | 2.17876  | 3.43351  | 497 |
| Zfp386   | 21.9517  | 17.5755  | 10.1995  | 352 |
| Zfp384   | 4.80176  | 1.7982   | 2.87384  | 351 |
| Zfp361l1 | 12.1195  | 6.88339  | 1.91589  | 349 |
| Zfp367   | 0        | 0.708814 | 0.342623 | 345 |
| Zfp366   | 1.25544  | 3.34916  | 1.48199  | 338 |
| Zfp365   | 3.54632  | 2.50701  | 11.5976  | 498 |
| Zfp334   | 0.591053 | 1.4004   | 1.48199  | 345 |
| Zfp324   | 0.591053 | 1.41763  | 0        | 349 |
| Zfp322a  | 23.3962  | 20.0006  | 18.0094  | 348 |
| Zfp282   | 2.10535  | 1.7982   | 2.4613   | 177 |
| Zfp273   | 4.94885  | 4.51877  | 2.16724  | 176 |
| Zfp260   | 24.8974  | 10.2964  | 13.4137  | 507 |
| Zfp235   | 2.95527  | 1.72865  | 3.32796  | 185 |
| Zfp191   | 8.74006  | 4.20775  | 4.97115  | 326 |
| Zfp169   | 2.10535  | 1.78097  | 2.95104  | 508 |
| Zfp157   | 3.9404   | 3.49894  | 2.78256  | 334 |
| Zfp142   | 4.8751   | 0.761137 | 1.30057  | 338 |
| Zfp106   | 10.7133  | 11.6837  | 12.5333  | 329 |
| Zfhx4    | 12.9244  | 7.63714  | 10.2538  | 343 |
| Zfc3h1   | 2.51088  | 0.380568 | 3.07662  | 177 |

|          |          |          |          |     |
|----------|----------|----------|----------|-----|
| Zer1     | 0.664388 | 1.41763  | 2.18859  | 351 |
| Zeb1     | 28.9544  | 17.9122  | 21.6723  | 324 |
| Zdhhc8   | 0.923247 | 0        | 2.78256  | 348 |
| Zdhhc20  | 18.8984  | 11.0172  | 18.8792  | 350 |
| Zbtb7c   | 1.18211  | 0.761137 | 0.685246 | 335 |
| Zbtb6    | 5.64957  | 1.85052  | 3.12518  | 510 |
| Zbtb40   | 0.591053 | 1.08938  | 1.57327  | 340 |
| Zbtb39   | 0.591053 | 0        | 1.64319  | 500 |
| Zbtb37   | 1.18211  | 1.41763  | 0        | 347 |
| Zbtb33   | 1.97487  | 2.12644  | 0        | 180 |
| Zbtb18   | 82.6921  | 48.5242  | 29.6983  | 341 |
| Zbtb16   | 0.591053 | 0.708814 | 1.67692  | 337 |
| Ywhaz    | 85.4394  | 54.5473  | 56.7021  | 179 |
| Ywhaq    | 31.1419  | 23.7341  | 22.4372  | 499 |
| Ythdf2   | 7.52487  | 1.7982   | 3.74051  | 180 |
| Ythdc2   | 0        | 0.708814 | 3.29367  | 337 |
| Ypel1    | 0.664388 | 0.380568 | 0.615324 | 337 |
| Yeats4   | 7.58052  | 3.11837  | 3.05526  | 179 |
| Ybey     | 4.71364  | 1.08938  | 3.81771  | 493 |
| Yae1d1   | 20.4311  | 6.84731  | 11.6966  | 353 |
| Xylt2    | 1.77316  | 0.708814 | 1.82461  | 183 |
| Xrcc6bp1 | 0        | 0        | 0.685246 | 189 |
| Xrcc2    | 4.37125  | 2.79012  | 5.57657  | 489 |
| Xndc1    | 22.2863  | 10.4724  | 13.7726  | 337 |
| Wscd2    | 0.332194 | 0        | 0.615324 | 338 |
| Wnk1     | 3.448    | 3.1986   | 2.09731  | 329 |
| Wipf1    | 4.5429   | 1.41763  | 3.76186  | 357 |
| Whsc1l1  | 15.0209  | 9.31922  | 9.79651  | 340 |
| Wfs1     | 2.08339  | 0        | 2.09731  | 356 |
| Wfikkn2  | 0        | 0.708814 | 0        | 341 |
| Wdr82    | 4.59795  | 4.86424  | 2.18859  | 333 |
| Wdr81    | 0.332194 | 0        | 0.615324 | 342 |
| Wdr76    | 10.1272  | 5.58977  | 11.2951  | 336 |
| Wdr4     | 0.923247 | 2.02899  | 3.07662  | 334 |
| Wdr18    | 8.7437   | 6.29097  | 3.41062  | 337 |
| Wdr11    | 5.78005  | 2.9399   | 4.18169  | 329 |
| Wdfy2    | 0.332194 | 0        | 0.615324 | 178 |
| Wbp4     | 25.02    | 18.0336  | 18.2206  | 180 |
| Wasl     | 5.46615  | 3.82718  | 6.47906  | 348 |
| Wapal    | 4.05827  | 1.08938  | 0.957947 | 337 |
| Wac      | 8.12916  | 5.96343  | 8.18056  | 356 |
| Vstm2a   | 17.8291  | 14.239   | 14.2166  | 195 |
| Vopp1    | 0.332194 | 1.08938  | 1.30057  | 339 |
| Vkorc1l1 | 0.664388 | 0        | 0.957947 | 500 |
| Vipr2    | 2.10535  | 0        | 2.53122  | 344 |
| Vipr1    | 0        | 0.380568 | 1.23065  | 348 |
| Vhl      | 2.08339  | 0.761137 | 0.615324 | 511 |

|           |          |          |          |     |
|-----------|----------|----------|----------|-----|
| Vezt      | 7.29062  | 5.13013  | 1.57327  | 337 |
| Vcl       | 3.48917  | 1.08938  | 3.56637  | 342 |
| Vat1l     | 46.0665  | 26.0994  | 20.0597  | 329 |
| Vamp4     | 16.5679  | 7.24403  | 6.12876  | 187 |
| Vamp2     | 4.8997   | 3.8223   | 4.45076  | 183 |
| Utrn      | 0.923247 | 0.761137 | 1.23065  | 351 |
| Utp23     | 4.03905  | 2.40956  | 2.18859  | 330 |
| Usp8      | 136.946  | 106.388  | 103.915  | 182 |
| Usp7      | 2.51088  | 0        | 1.23065  | 694 |
| Usp49     | 16.9252  | 16.6549  | 18.1599  | 341 |
| Usp46     | 18.4353  | 10.8462  | 10.1398  | 344 |
| Usp43     | 0.332194 | 0        | 0.615324 | 353 |
| Usp36     | 1.18211  | 0.761137 | 1.64319  | 334 |
| Usp22     | 4.76059  | 1.7982   | 0.957947 | 346 |
| Usp14     | 21.0242  | 10.6955  | 19.1121  | 510 |
| Usp12     | 4.20861  | 2.12644  | 1.48199  | 344 |
| Upk1b     | 0        | 0.380568 | 0.615324 | 190 |
| Umodl1    | 0        | 0.708814 | 0        | 337 |
| Ulk2      | 0.591053 | 0        | 1.30057  | 344 |
| Uimc1     | 5.03563  | 4.80189  | 5.73361  | 175 |
| Uhrf1bp1l | 0.923247 | 5.12243  | 1.82461  | 509 |
| Ugcg      | 1.32878  | 2.7378   | 0.615324 | 185 |
| Uevld     | 2.67445  | 1.85052  | 0.342623 | 338 |
| Ubxn2a    | 5.07723  | 2.32163  | 4.75354  | 180 |
| Ubxn10    | 0.923247 | 0.708814 | 0.615324 | 339 |
| Ubtf      | 8.76203  | 3.49894  | 3.14654  | 505 |
| Ubt2      | 0        | 0.761137 | 0.957947 | 351 |
| Ublcp1    | 5.64266  | 2.10922  | 6.92455  | 333 |
| Ubl4      | 9.56738  | 8.49052  | 5.35669  | 336 |
| Ube3b     | 1.84649  | 2.02899  | 0.342623 | 185 |
| Ube3a     | 5.79328  | 4.30521  | 2.95104  | 342 |
| Ube2z     | 2.43755  | 1.41763  | 1.23065  | 494 |
| Ube2n     | 75.416   | 57.4878  | 45.945   | 506 |
| Ube2k     | 116.021  | 83.4344  | 72.0982  | 496 |
| Ube2j2    | 7.69988  | 3.14628  | 2.18859  | 176 |
| Ube2j1    | 18.2751  | 15.3923  | 20.481   | 358 |
| Ube2e2    | 6.68134  | 3.94251  | 2.85248  | 335 |
| Ubash3b   | 0.923247 | 1.85052  | 0.615324 | 343 |
| Ubap2l    | 29.5305  | 27.6464  | 18.4435  | 355 |
| Ubac2     | 1.25544  | 0.761137 | 1.57327  | 330 |
| Ubac1     | 0.332194 | 2.50701  | 0.615324 | 338 |
| Uba5      | 3.78322  | 0.761137 | 3.05526  | 172 |
| Tyw5      | 15.8735  | 10.9362  | 9.72565  | 333 |
| Tyw1      | 2.10535  | 1.7982   | 0.957947 | 347 |
| Txlng     | 13.6341  | 8.69558  | 9.29269  | 343 |
| Txlna     | 7.21432  | 2.9399   | 7.38973  | 496 |
| Twistnb   | 3.28746  | 1.08938  | 1.57327  | 345 |

|             |          |          |          |      |
|-------------|----------|----------|----------|------|
| Twf1        | 9.28659  | 7.61876  | 4.89339  | 349  |
| Tufm        | 8.00801  | 2.40956  | 2.18859  | 547  |
| Tubb5       | 115.648  | 57.7967  | 26.7869  | 321  |
| Ttpa        | 5.00348  | 5.01402  | 0.957947 | 350  |
| Ttl12       | 0.923247 | 1.41763  | 0.615324 | 495  |
| Tti2        | 1.18211  | 1.08938  | 2.31436  | 328  |
| Ttc9c       | 21.0505  | 13.9174  | 10.127   | 350  |
| Ttc39a      | 0.591053 | 0.380568 | 0.615324 | 189  |
| Ttc23       | 4.93014  | 2.7378   | 2.53122  | 339  |
| Ttc17       | 7.8058   | 1.41763  | 4.6409   | 184  |
| Tspyl1      | 15.0369  | 7.26298  | 15.1311  | 340  |
| Tspan9      | 0.591053 | 2.10922  | 0.615324 | 335  |
| Tspan12     | 4.16408  | 2.88758  | 2.74827  | 351  |
| Tspan11     | 0        | 1.08938  | 1.57327  | 343  |
| Tshz1       | 7.10883  | 5.36014  | 10.8741  | 353  |
| Tsc1        | 1.58764  | 0.380568 | 2.53122  | 329  |
| Trpm2       | 3.15698  | 0        | 1.84597  | 338  |
| Trp53inp2   | 4.28404  | 1.90284  | 5.82488  | 345  |
| Trp53cor1   | 0.332194 | 0        | 0.615324 | 513  |
| Trnp1       | 0        | 0.761137 | 1.20929  | 334  |
| Trmt6       | 19.7195  | 12.4244  | 17.4259  | 339  |
| Trmt61b     | 12.1694  | 5.62538  | 6.202    | 184  |
| Trmt12      | 2.67445  | 1.08938  | 1.57327  | 186  |
| Trmt10b     | 9.48271  | 7.04716  | 9.50434  | 340  |
| Trmt10a     | 21.5578  | 9.80688  | 17.1325  | 1239 |
| Trip4       | 16.7145  | 6.74267  | 10.1467  | 331  |
| Trip12      | 15.4989  | 6.97346  | 12.6976  | 334  |
| Trim62      | 0.332194 | 0.380568 | 1.79032  | 324  |
| Trim56      | 1.05163  | 0.761137 | 0.342623 | 720  |
| Trim36      | 1.32878  | 1.7982   | 0.342623 | 353  |
| Trim35      | 9.84881  | 5.47072  | 11.3374  | 344  |
| Trim30e-ps1 | 1.18211  | 0.708814 | 0        | 508  |
| Trim24      | 3.2655   | 1.7982   | 2.18859  | 340  |
| Trim21      | 0.923247 | 0.708814 | 0.957947 | 332  |
| Trim12c     | 2.43755  | 1.41763  | 1.57327  | 964  |
| Trhr        | 6.31396  | 5.32504  | 3.48916  | 493  |
| Trhde       | 4.46957  | 1.7982   | 5.67776  | 323  |
| Trappc13    | 39.5699  | 39.0149  | 23.2155  | 350  |
| Trappc10    | 3.0286   | 0        | 1.84597  | 171  |
| Trak2       | 15.5068  | 11.8248  | 13.25    | 341  |
| Traf3ip1    | 1.91983  | 2.55933  | 3.02097  | 330  |
| Tra2b       | 32.4928  | 17.8109  | 23.5434  | 344  |
| Tpm2        | 8.50791  | 1.08938  | 0.342623 | 676  |
| Tpm1        | 55.4617  | 33.6879  | 38.5145  | 185  |
| Tomm70a     | 4.48576  | 1.85052  | 2.53122  | 335  |
| Tnrc6c      | 2.43755  | 0.708814 | 1.57327  | 336  |
| Tnrc6a      | 18.5199  | 11.2214  | 15.0662  | 182  |

|           |          |          |          |     |
|-----------|----------|----------|----------|-----|
| Tnfaip8l1 | 0        | 0.708814 | 0        | 495 |
| Tnfaip8   | 5.40394  | 2.17876  | 1.23065  | 178 |
| Tmtc3     | 4.74462  | 2.80081  | 2.25852  | 497 |
| Tmem65    | 4.03905  | 1.46995  | 0.957947 | 180 |
| Tmem55b   | 0        | 0.708814 | 0.342623 | 181 |
| Tmem50b   | 9.50104  | 10.4107  | 9.0372   | 331 |
| Tmem47    | 16.7061  | 18.0915  | 20.5535  | 489 |
| Tmem44    | 0.591053 | 1.08938  | 0        | 339 |
| Tmem43    | 13.6959  | 10.1415  | 11.7088  | 495 |
| Tmem33    | 10.9386  | 10.5381  | 8.21991  | 522 |
| Tmem229b  | 3.19216  | 1.08938  | 0.615324 | 178 |
| Tmem19    | 2.93331  | 2.88758  | 4.16033  | 186 |
| Tmem179   | 1.5143   | 0.380568 | 1.30057  | 357 |
| Tmem177   | 1.25544  | 3.17069  | 1.7204   | 352 |
| Tmem167b  | 6.4766   | 2.79012  | 5.84644  | 185 |
| Tmem161a  | 0.923247 | 0        | 2.95104  | 181 |
| Tmem150c  | 4.5429   | 2.83525  | 1.10507  | 671 |
| Tmem135   | 6.3823   | 4.20775  | 4.29745  | 332 |
| Tmem129   | 3.0286   | 2.55933  | 2.95104  | 324 |
| Tmem127   | 4.61624  | 0        | 0.615324 | 491 |
| Tmem110   | 0.591053 | 0        | 0.685246 | 349 |
| Tmem107   | 2.89812  | 1.7982   | 1.7204   | 180 |
| Tmem104   | 3.28746  | 1.08938  | 0.615324 | 332 |
| Tmeff1    | 2.10535  | 1.7982   | 1.57327  | 338 |
| Tmed7     | 1.97487  | 1.46995  | 2.74827  | 182 |
| Tmed4     | 33.5242  | 34.5911  | 44.9414  | 332 |
| Tmed2     | 1.25544  | 1.14171  | 0.685246 | 185 |
| Tmed1     | 3.23032  | 2.88758  | 2.09731  | 341 |
| Tmco1     | 36.1723  | 22.1153  | 27.3586  | 191 |
| Tmcc3     | 0.591053 | 1.41763  | 2.80392  | 180 |
| Tmc7      | 1.5143   | 1.7982   | 1.57327  | 342 |
| Tma7      | 9.29104  | 9.92428  | 3.32796  | 324 |
| Tm9sf4    | 12.3943  | 8.82592  | 7.09002  | 504 |
| Tln2      | 4.35231  | 0.761137 | 3.41924  | 353 |
| Tlk1      | 6.78986  | 2.50701  | 1.64319  | 357 |
| Tle3      | 2.10535  | 0.708814 | 0        | 510 |
| Timp3     | 7.8421   | 5.6642   | 4.82726  | 347 |
| Timp2     | 0.591053 | 0.380568 | 0.615324 | 499 |
| Timm22    | 2.47063  | 3.11837  | 2.51441  | 334 |
| Thumpd3   | 12.8597  | 7.37845  | 8.88431  | 352 |
| Thsd7b    | 2.13751  | 2.70219  | 0.615324 | 179 |
| Them4     | 5.35164  | 5.27272  | 3.05526  | 499 |
| Tgtp2     | 0.591053 | 1.08938  | 11.1594  | 190 |
| Tgoln2    | 54.4309  | 48.3287  | 63.5069  | 180 |
| Tenm3     | 1.91983  | 2.50701  | 0.615324 | 499 |
| Tecpr2    | 0.591053 | 0        | 0.685246 | 181 |
| Tdrd3     | 4.40643  | 0.380568 | 0.866667 | 341 |

|            |          |          |          |     |
|------------|----------|----------|----------|-----|
| Tdrd1      | 0        | 0        | 1.10507  | 335 |
| Tcea1      | 15.6771  | 9.7387   | 10.9806  | 353 |
| Tbc1d5     | 30.5442  | 17.6205  | 26.6789  | 339 |
| Tbc1d23    | 23.7581  | 12.9153  | 10.7802  | 331 |
| Tbc1d16    | 0        | 0        | 0.615324 | 345 |
| Tbc1d14    | 7.18669  | 4.16611  | 4.20814  | 332 |
| Tapt1      | 1.25544  | 1.14171  | 1.02787  | 183 |
| Tapbp      | 2.76974  | 1.7982   | 2.25852  | 335 |
| Taf9b      | 30.5596  | 17.7643  | 20.7129  | 342 |
| Taf7       | 13.1827  | 12.8965  | 7.74443  | 345 |
| Tada1      | 4.69588  | 1.46995  | 3.14654  | 333 |
| Tacr1      | 0.923247 | 0.708814 | 0        | 339 |
| Tab3       | 0        | 0        | 1.64319  | 352 |
| Tab1       | 5.04583  | 0.761137 | 2.40564  | 334 |
| Syt9       | 0.591053 | 0.708814 | 2.06302  | 339 |
| Syt16      | 2.10535  | 0.708814 | 1.48199  | 347 |
| Syt1       | 79.8698  | 70.0984  | 90.4414  | 513 |
| Syt12      | 0.923247 | 0.708814 | 1.64319  | 339 |
| Sys1       | 0        | 0        | 0.615324 | 361 |
| Synpo      | 4.11541  | 7.70365  | 8.40699  | 340 |
| Synpo2     | 0.591053 | 0        | 0.615324 | 348 |
| Synj2      | 10.5798  | 11.5004  | 12.2904  | 339 |
| Syng1      | 9.33836  | 7.92978  | 10.9774  | 340 |
| Svil       | 0        | 0.708814 | 1.23065  | 331 |
| Sv2b       | 124.741  | 129.561  | 116.173  | 187 |
| Susd2      | 2.10535  | 1.41763  | 0        | 180 |
| Sulf2      | 5.13396  | 3.92464  | 2.25852  | 183 |
| Sucla2     | 91.9176  | 82.8119  | 73.7109  | 505 |
| Sub1       | 58.9738  | 55.2142  | 40.9093  | 504 |
| Stxbp1     | 52.8266  | 36.3676  | 37.532   | 331 |
| Stx7       | 19.1491  | 7.00856  | 8.57003  | 348 |
| Stx12      | 15.6779  | 8.29665  | 8.63731  | 498 |
| Strip1     | 2.67445  | 2.10922  | 1.57327  | 173 |
| Stmn2      | 168.498  | 104.166  | 31.2056  | 337 |
| Stk4       | 18.7475  | 15.048   | 12.4307  | 662 |
| Stk39      | 1.25544  | 1.14171  | 2.18859  | 176 |
| Stk11      | 1.77316  | 1.41763  | 3.48916  | 188 |
| Stk10      | 0.664388 | 0        | 0.615324 | 349 |
| Stim1      | 0.591053 | 0        | 1.30057  | 353 |
| Stc1       | 1.7512   | 1.08938  | 0.342623 | 348 |
| Stat6      | 2.65523  | 1.46995  | 0.957947 | 345 |
| Stat5a     | 0        | 0.380568 | 0.615324 | 340 |
| Stat3      | 5.68383  | 2.17876  | 4.19151  | 329 |
| Stat2      | 4.47589  | 6.41835  | 3.81498  | 344 |
| Stard7     | 6.53941  | 0.380568 | 2.87384  | 487 |
| St6galnac2 | 1.18211  | 0        | 0.957947 | 349 |
| St3gal4    | 0.923247 | 1.41763  | 0.342623 | 349 |

|         |          |          |          |      |
|---------|----------|----------|----------|------|
| St3gal2 | 1.18211  | 0        | 0.957947 | 500  |
| Ssbp1   | 27.0605  | 15.9102  | 15.4474  | 372  |
| Srxn1   | 1.5143   | 0        | 1.57327  | 361  |
| Srsf3   | 15.5163  | 8.40681  | 10.5721  | 340  |
| Srsf12  | 3.79941  | 0.708814 | 1.7204   | 335  |
| Srsf10  | 45.5379  | 25.3325  | 28.3097  | 500  |
| Srp72   | 7.09226  | 3.49894  | 6.10123  | 345  |
| Sri     | 19.6945  | 19.2887  | 14.1769  | 178  |
| Srebf2  | 12.603   | 7.85343  | 7.1813   | 175  |
| Src     | 1.18211  | 0        | 0.685246 | 340  |
| Spty2d1 | 2.95527  | 5.39703  | 2.94257  | 337  |
| Sptssb  | 2.36421  | 1.08938  | 0.866667 | 348  |
| Sprn    | 0.591053 | 2.17876  | 2.53122  | 335  |
| Spink8  | 2.10535  | 0.708814 | 1.23065  | 340  |
| Spink10 | 2.10535  | 2.7378   | 2.80392  | 505  |
| Spice1  | 1.97487  | 1.08938  | 2.87384  | 490  |
| Spdl1   | 0.923247 | 0.708814 | 1.23065  | 174  |
| Spcs3   | 16.0126  | 9.32581  | 15.5727  | 500  |
| Spcs2   | 44.6757  | 39.4059  | 32.6693  | 336  |
| Spata2  | 0        | 2.50701  | 0.342623 | 346  |
| Spag16  | 0        | 0        | 2.18859  | 182  |
| Sox9    | 0.591053 | 0.708814 | 0.615324 | 1020 |
| Sox13   | 0        | 0        | 0.957947 | 496  |
| Sorbs1  | 25.5399  | 16.2171  | 11.1663  | 491  |
| Son     | 234.647  | 211.778  | 187.685  | 334  |
| Socs6   | 0.664388 | 0.380568 | 1.82461  | 185  |
| Soat1   | 16.8601  | 12.9793  | 18.4922  | 181  |
| Snapin  | 8.53765  | 10.9597  | 15.3396  | 500  |
| Smg7    | 14.3799  | 11.6664  | 9.71607  | 175  |
| Smg6    | 30.4535  | 10.853   | 20.4591  | 338  |
| Smco1   | 0        | 0        | 0.957947 | 398  |
| Smarcd1 | 0.664388 | 1.46995  | 0.957947 | 342  |
| Slu7    | 32.8924  | 27.9608  | 31.1834  | 342  |
| Slmap   | 6.7033   | 5.01402  | 12.2994  | 185  |
| Slitrk5 | 6.98045  | 4.7381   | 2.18859  | 191  |
| Slitrk1 | 25.6951  | 18.522   | 25.2174  | 501  |
| Slit2   | 2.62105  | 0.380568 | 0.866667 | 331  |
| Sfn5    | 1.18211  | 1.72865  | 1.57327  | 350  |
| Slco3a1 | 0.332194 | 1.7982   | 0        | 331  |
| Slc8a2  | 1.5143   | 2.40956  | 0.615324 | 498  |
| Slc7a5  | 2.43755  | 0        | 0.615324 | 334  |
| Slc6a17 | 5.06062  | 3.17069  | 4.17441  | 348  |
| Slc6a11 | 5.10989  | 1.46995  | 2.18859  | 490  |
| Slc45a4 | 0        | 0.708814 | 1.84597  | 366  |
| Slc44a2 | 3.61965  | 0.380568 | 2.07596  | 333  |
| Slc41a2 | 6.73546  | 1.7982   | 4.16033  | 327  |
| Slc39a9 | 7.57928  | 3.42939  | 1.57327  | 521  |

|           |          |          |          |     |
|-----------|----------|----------|----------|-----|
| Slc39a2   | 1.77316  | 0.708814 | 2.80392  | 348 |
| Slc39a10  | 28.7495  | 17.0826  | 24.5525  | 524 |
| Slc38a2   | 4.77707  | 2.02899  | 5.75496  | 342 |
| Slc38a1   | 62.8279  | 37.7248  | 51.712   | 343 |
| Slc37a3   | 6.43061  | 3.17069  | 9.85503  | 332 |
| Slc35e3   | 1.25544  | 0        | 0.957947 | 324 |
| Slc35c2   | 2.23373  | 0        | 2.43994  | 179 |
| Slc35b4   | 3.15698  | 1.08938  | 1.57327  | 344 |
| Slc35a4   | 5.0167   | 4.25704  | 4.32035  | 334 |
| Slc35a2   | 4.37427  | 1.32017  | 2.53122  | 363 |
| Slc2a3    | 102.108  | 102.243  | 66.877   | 344 |
| Slc25a46  | 0        | 1.08938  | 1.02787  | 176 |
| Slc22a15  | 1.18211  | 0.708814 | 0.342623 | 490 |
| Slc19a3   | 0.332194 | 1.41763  | 0        | 188 |
| Slc17a7   | 2.5214   | 3.1986   | 1.23065  | 329 |
| Slc17a5   | 4.70436  | 3.54407  | 2.80392  | 348 |
| Slc15a2   | 7.58262  | 2.10922  | 4.28591  | 341 |
| Slc12a5   | 18.7304  | 11.7849  | 16.4165  | 342 |
| Skp2      | 3.54632  | 0.708814 | 0.615324 | 362 |
| Ski       | 1.32878  | 0.761137 | 0.685246 | 357 |
| Sik1      | 0.664388 | 0.708814 | 0        | 189 |
| Sidt2     | 0.332194 | 0.761137 | 1.57327  | 347 |
| Siae      | 2.36421  | 1.08938  | 1.57327  | 341 |
| Shisa9    | 0.923247 | 0        | 0.615324 | 342 |
| Shisa5    | 13.2145  | 9.36091  | 15.1068  | 504 |
| Shank1    | 29.4324  | 12.9646  | 17.2799  | 346 |
| Sh3rf2    | 0        | 0        | 1.57327  | 333 |
| Sh3kbp1   | 10.4675  | 3.44662  | 7.32823  | 347 |
| Sgpp2     | 4.13737  | 1.08938  | 4.44711  | 498 |
| Sgpl1     | 6.36533  | 1.14171  | 3.21646  | 481 |
| Sgol1     | 1.58764  | 0.708814 | 0        | 329 |
| Sf3b1     | 35.4885  | 20.1445  | 25.572   | 344 |
| Setx      | 6.18558  | 5.44691  | 0.615324 | 344 |
| Sertm1    | 0.923247 | 1.08938  | 0        | 510 |
| Serpini1  | 36.4838  | 29.4399  | 44.2746  | 346 |
| Serpine2  | 25.1283  | 20.9359  | 15.3512  | 480 |
| Serpinb9  | 0        | 0        | 0.615324 | 354 |
| Serpinb8  | 0        | 0.761137 | 2.43994  | 502 |
| Serpinb11 | 0        | 0        | 1.23065  | 183 |
| Serinc5   | 0.591053 | 0.380568 | 0.957947 | 346 |
| Serinc3   | 18.5989  | 9.06845  | 14.3283  | 494 |
| Serf2     | 7.30687  | 5.42277  | 5.7653   | 354 |
| Sept3     | 6.13054  | 3.82718  | 3.97891  | 177 |
| Sept10    | 3.57303  | 4.54668  | 1.82461  | 340 |
| Sepn1     | 0        | 0        | 1.23065  | 335 |
| Senp2     | 4.15356  | 1.46995  | 3.46781  | 498 |
| Sema3c    | 4.41242  | 1.08938  | 1.23065  | 358 |



|           |          |          |          |     |
|-----------|----------|----------|----------|-----|
| Selt      | 16.4462  | 12.7678  | 15.1301  | 336 |
| Secisbp2l | 5.31948  | 2.17876  | 2.53122  | 496 |
| Sec61a1   | 14.5062  | 5.86985  | 1.89454  | 517 |
| Sec16a    | 18.3554  | 13.2805  | 13.7253  | 340 |
| Sdhaf2    | 10.2895  | 7.12324  | 5.80353  | 205 |
| Sdf4      | 16.6695  | 12.8494  | 14.8591  | 335 |
| Scrt1     | 17.1724  | 16.4061  | 56.9718  | 501 |
| Scpep1    | 1.5143   | 0.380568 | 0.615324 | 505 |
| Scoc      | 36.6926  | 29.1064  | 23.3715  | 527 |
| Sco1      | 0.332194 | 0        | 1.64319  | 345 |
| Scn3a     | 31.3061  | 19.7159  | 19.6277  | 334 |
| Scml4     | 2.69641  | 1.7982   | 0.342623 | 350 |
| Scd2      | 105.027  | 75.4519  | 70.3926  | 339 |
| Sccpdh    | 14.9634  | 7.5922   | 10.319   | 184 |
| Scarna8   | 2.36421  | 0.708814 | 0.342623 | 180 |
| Scaf11    | 5.05852  | 2.88758  | 3.88763  | 501 |
| Satb2     | 2.34225  | 0        | 1.23065  | 340 |
| Sass6     | 5.0146   | 1.7982   | 2.33572  | 500 |
| Sap18     | 10.2041  | 8.34413  | 10.4887  | 493 |
| Samhd1    | 4.33909  | 1.08938  | 0.615324 | 505 |
| Samd5     | 5.51752  | 6.05108  | 1.57327  | 177 |
| Samd4b    | 1.77316  | 0.708814 | 1.02787  | 335 |
| Samd3     | 0.591053 | 0.708814 | 0.615324 | 339 |
| Sall1     | 2.36421  | 1.08938  | 0.615324 | 365 |
| Rwdd4a    | 5.27285  | 5.48629  | 2.4613   | 177 |
| Rusc1     | 8.5786   | 6.99788  | 8.9017   | 346 |
| Rufy3     | 79.9153  | 43.3364  | 46.6356  | 357 |
| Rtn4      | 70.4446  | 65.6031  | 93.9257  | 350 |
| Rtkn      | 0.591053 | 0        | 0.615324 | 181 |
| Rtf1      | 12.2669  | 7.19659  | 7.29959  | 341 |
| Rsph4a    | 2.69641  | 1.08938  | 2.34866  | 836 |
| Rsb1l     | 1.77316  | 2.02899  | 1.23065  | 487 |
| Rsb1      | 0.332194 | 0.708814 | 0.342623 | 328 |
| Rrnad1    | 4.16953  | 2.50701  | 3.29367  | 343 |
| Rps6kb1   | 43.4777  | 23.2764  | 24.8448  | 530 |
| Rps27     | 1.97487  | 0.380568 | 2.53122  | 170 |
| Rprd2     | 17.3809  | 10.7914  | 7.71476  | 326 |
| Rprd1a    | 16.5071  | 16.053   | 14.5916  | 490 |
| Rpp14     | 9.17468  | 7.19232  | 5.81626  | 504 |
| Rpn1      | 26.3301  | 16.0815  | 14.6425  | 507 |
| Rorc      | 0        | 0        | 0.957947 | 340 |
| Rock2     | 0.591053 | 0.708814 | 2.53122  | 339 |
| Robo2     | 25.9306  | 16.4088  | 9.81401  | 507 |
| Rnf43     | 2.43755  | 1.41763  | 6.00631  | 345 |
| Rnf41     | 10.6407  | 2.9399   | 6.86569  | 346 |
| Rnf40     | 4.73862  | 4.74299  | 4.44318  | 340 |
| Rnf19a    | 4.37427  | 2.88758  | 2.18859  | 185 |

|          |          |          |          |     |
|----------|----------|----------|----------|-----|
| Rnf146   | 21.2449  | 25.2237  | 24.7271  | 335 |
| Rnf145   | 1.5143   | 1.41763  | 0.615324 | 337 |
| Rnf128   | 0.591053 | 2.12644  | 1.57327  | 324 |
| Rnf122   | 2.43755  | 2.10922  | 1.23065  | 352 |
| Rnf114   | 0        | 0.708814 | 0.615324 | 340 |
| Rnd3     | 64.0707  | 42.9378  | 23.4937  | 188 |
| Rnasel   | 8.26687  | 2.50701  | 2.67834  | 332 |
| Rlf      | 3.54632  | 2.50701  | 4.71981  | 355 |
| Riok3    | 3.33883  | 6.29859  | 3.02097  | 332 |
| Rin2     | 2.82479  | 1.4004   | 0        | 183 |
| Rims2    | 9.1892   | 4.7381   | 8.01348  | 488 |
| Rhoq     | 1.5143   | 0        | 0.685246 | 347 |
| Rhof     | 2.93331  | 1.7982   | 1.23065  | 353 |
| Rhno1    | 1.77316  | 1.46995  | 1.91589  | 327 |
| Rheb     | 17.976   | 17.5265  | 13.2292  | 508 |
| Rgs3     | 0        | 0        | 0.615324 | 336 |
| Rfx4     | 3.85321  | 4.07822  | 3.2852   | 183 |
| Rfc1     | 21.5903  | 10.8702  | 13.9251  | 350 |
| Rev3l    | 3.98401  | 2.08131  | 3.14654  | 353 |
| Rell1    | 1.25544  | 1.08938  | 1.48199  | 490 |
| Recql5   | 11.2182  | 5.70561  | 7.77451  | 326 |
| Rdh1     | 0.591053 | 0        | 0.615324 | 539 |
| Rdh10    | 0.332194 | 0        | 1.23065  | 184 |
| Rbx1     | 20.4116  | 16.5588  | 19.78    | 182 |
| Rbm41    | 1.25544  | 0.761137 | 1.57327  | 337 |
| Rbm25    | 34.1053  | 21.7994  | 20.868   | 357 |
| Rbm19    | 3.03912  | 2.50701  | 3.12518  | 344 |
| Rbbp5    | 9.96788  | 5.73247  | 4.37719  | 358 |
| Rbbp4    | 6.10858  | 3.97696  | 2.32844  | 348 |
| Rbak     | 3.96236  | 1.46995  | 1.30057  | 342 |
| Rassf4   | 10.2267  | 6.17458  | 6.13509  | 178 |
| Rassf2   | 0.332194 | 2.81803  | 0.342623 | 330 |
| Rassf1   | 6.39781  | 1.46995  | 1.84597  | 352 |
| Rasgef1b | 6.77725  | 4.87492  | 5.71529  | 343 |
| Rapgef6  | 16.5329  | 6.15572  | 10.4784  | 334 |
| Rapgef2  | 23.5021  | 13.5231  | 22.6218  | 337 |
| Rap2a    | 6.87674  | 2.17876  | 3.14654  | 486 |
| Ranbp3   | 5.59453  | 3.80996  | 3.37653  | 336 |
| Ralgapb  | 0.332194 | 0        | 1.82461  | 348 |
| Rala     | 6.88213  | 4.26008  | 3.83179  | 341 |
| Rad51b   | 1.18211  | 0.708814 | 0.615324 | 178 |
| Rad23a   | 12.8564  | 10.0707  | 13.5464  | 335 |
| Rad17    | 3.15698  | 1.46995  | 1.30057  | 181 |
| Rab5b    | 14.6495  | 6.66659  | 12.7128  | 330 |
| Rab4a    | 7.8956   | 4.84702  | 5.01406  | 182 |
| Rab43    | 1.77316  | 1.7982   | 0        | 330 |
| Rab3gap2 | 5.85136  | 5.00095  | 5.75861  | 351 |

|           |          |          |          |     |
|-----------|----------|----------|----------|-----|
| Rab3a     | 19.7669  | 11.089   | 15.366   | 173 |
| Rab37     | 0        | 0        | 3.05526  | 343 |
| Rab33b    | 2.51088  | 1.14171  | 2.80392  | 502 |
| Rab32     | 0.332194 | 0.708814 | 0        | 495 |
| Rab31     | 14.4978  | 11.6116  | 7.63173  | 350 |
| Rab30     | 11.3813  | 9.28478  | 7.70262  | 334 |
| Rab27a    | 6.77453  | 6.03385  | 5.91685  | 492 |
| Rab23     | 5.00348  | 1.08938  | 0.957947 | 339 |
| Rab12     | 5.53948  | 2.17876  | 1.30057  | 349 |
| Rab11fip3 | 2.10535  | 0.380568 | 1.23065  | 347 |
| Qser1     | 0        | 0.380568 | 1.30057  | 351 |
| Qpct      | 8.43044  | 4.92725  | 4.9748   | 333 |
| Qdpr      | 1.58764  | 2.55933  | 10.0823  | 342 |
| Pxylp1    | 0.923247 | 0.708814 | 2.21015  | 329 |
| Pxdn      | 4.67128  | 5.32504  | 1.48199  | 336 |
| Pxdc1     | 0        | 0.708814 | 0.342623 | 331 |
| Pvrl4     | 0        | 0.708814 | 0        | 196 |
| Pus10     | 2.69641  | 1.46995  | 4.52432  | 350 |
| Pttg1ip   | 19.7863  | 10.9616  | 16.1259  | 342 |
| Pttg1     | 4.0901   | 2.55933  | 2.8008   | 185 |
| Ptpro     | 5.53948  | 2.99222  | 1.91589  | 336 |
| Ptpre     | 0        | 0        | 0.615324 | 332 |
| Ptprd     | 33.4134  | 30.7211  | 22.8466  | 505 |
| Ptpn3     | 0        | 0        | 1.64319  | 322 |
| Ptgr2     | 23.4909  | 17.7421  | 15.5418  | 187 |
| Ptgir     | 0.591053 | 0.708814 | 1.91589  | 337 |
| Ptger1    | 0.591053 | 0        | 1.23065  | 171 |
| Ptcd3     | 17.8356  | 14.4041  | 14.0699  | 184 |
| Psmf1     | 7.32651  | 3.59639  | 3.89925  | 336 |
| Psme3     | 9.25624  | 9.20502  | 5.84238  | 347 |
| Psd       | 3.45873  | 0.708814 | 1.91589  | 339 |
| Prune2    | 0.591053 | 0.708814 | 0        | 335 |
| Prss35    | 6.2407   | 1.72865  | 0        | 512 |
| Prr5l     | 0.591053 | 0.708814 | 4.10449  | 344 |
| Prpf4b    | 80.4695  | 61.859   | 50.5312  | 185 |
| Prpf4     | 9.5031   | 3.54407  | 7.58101  | 498 |
| Prpf40a   | 29.4338  | 20.7825  | 15.1631  | 183 |
| Prpf31    | 16.7102  | 11.4511  | 12.3176  | 345 |
| Prpf18    | 50.8604  | 38.077   | 38.7224  | 519 |
| Prob1     | 1.18211  | 0        | 0.957947 | 189 |
| Prkx      | 0.591053 | 1.41763  | 0.342623 | 343 |
| Prkcz     | 16.5083  | 5.91802  | 11.3072  | 169 |
| Prkce     | 0.332194 | 0.708814 | 0.615324 | 483 |
| Prkar2a   | 2.17869  | 2.10922  | 2.25852  | 508 |
| Prkaa1    | 11.1324  | 8.22598  | 10.8659  | 325 |
| Prelp     | 6.99432  | 5.55583  | 10.4909  | 340 |
| Prdx6b    | 4.29517  | 2.89002  | 4.22148  | 346 |

|         |          |          |          |     |
|---------|----------|----------|----------|-----|
| Ppp6r3  | 24.1138  | 8.33718  | 14.8848  | 336 |
| Ppp3ca  | 1.25544  | 1.52227  | 1.37049  | 351 |
| Ppp2r5c | 20.1426  | 5.39459  | 9.86329  | 336 |
| Ppp2r3a | 6.77664  | 7.19278  | 6.78283  | 354 |
| Ppp2r2b | 28.6037  | 14.7392  | 21.4611  | 337 |
| Ppp2r2a | 5.46615  | 3.64871  | 6.02058  | 335 |
| Ppp1r26 | 0.591053 | 0.708814 | 0        | 486 |
| Ppp1r2  | 6.18558  | 2.17876  | 5.9291   | 183 |
| Ppp1r10 | 11.7483  | 10.255   | 12.0053  | 352 |
| Ppm1k   | 5.75809  | 3.40149  | 6.9086   | 335 |
| Ppm1a   | 2.43755  | 0.708814 | 1.30057  | 345 |
| Ppig    | 15.9437  | 13.7784  | 16.041   | 349 |
| Ppfibp1 | 22.9758  | 20.7456  | 12.0275  | 333 |
| Pou6f1  | 1.77316  | 1.7982   | 1.7204   | 345 |
| Pou3f2  | 2.80283  | 2.55933  | 0.342623 | 500 |
| Pou2f2  | 0        | 0        | 0.615324 | 519 |
| Pou2af1 | 0        | 0        | 0.615324 | 499 |
| Pomt1   | 4.31713  | 3.11837  | 1.57327  | 185 |
| Polr3g  | 4.50173  | 1.46995  | 0.342623 | 347 |
| Polr3f  | 3.33883  | 2.12644  | 2.78256  | 351 |
| Polr2l  | 1.91983  | 1.41763  | 1.84597  | 331 |
| Podxl   | 0.591053 | 1.41763  | 0.615324 | 362 |
| Pno1    | 9.56227  | 11.0151  | 7.15856  | 363 |
| Pnkd    | 9.52948  | 5.98872  | 7.77882  | 353 |
| Plxdc2  | 5.13396  | 1.90284  | 0.957947 | 518 |
| Plxdc1  | 0.332194 | 0        | 0.615324 | 359 |
| Plscr4  | 0.923247 | 0.380568 | 0.615324 | 504 |
| Pls1    | 2.82479  | 2.17876  | 8.67258  | 531 |
| Pip1    | 107.384  | 201.454  | 141.014  | 351 |
| Plekhg1 | 7.5715   | 2.79012  | 4.10449  | 348 |
| Plek    | 5.01883  | 1.7982   | 6.42282  | 341 |
| Pld5    | 3.92989  | 1.08938  | 7.62738  | 360 |
| Plch1   | 2.17869  | 2.43746  | 3.29367  | 342 |
| Plcd1   | 1.5143   | 1.7982   | 0.342623 | 192 |
| Plag1   | 0.923247 | 0        | 0.615324 | 333 |
| Pla2g6  | 0.332194 | 0.380568 | 0.615324 | 181 |
| Pla2g5  | 0        | 0.708814 | 0        | 340 |
| Pla2g16 | 1.77316  | 3.26815  | 4.25161  | 493 |
| Pkp4    | 1.18211  | 0.380568 | 0.957947 | 184 |
| Pkm     | 70.5132  | 78.1092  | 79.1385  | 185 |
| Pitpnc1 | 3.98493  | 2.9399   | 3.08154  | 502 |
| Pip4k2c | 3.61965  | 4.61623  | 4.33447  | 347 |
| Pip4k2b | 2.43755  | 1.08938  | 0.342623 | 497 |
| Pik3cd  | 0        | 0.708814 | 0.615324 | 181 |
| Pik3c2a | 9.10553  | 10.5392  | 7.47322  | 338 |
| Pigh    | 5.7848   | 1.41763  | 1.48199  | 336 |
| Pias2   | 2.10535  | 1.41763  | 2.87384  | 352 |

|          |          |          |          |     |
|----------|----------|----------|----------|-----|
| Pianp    | 3.0265   | 2.17876  | 1.91589  | 342 |
| Phtf2    | 7.49506  | 1.70074  | 2.51441  | 343 |
| Phlda1   | 0.591053 | 0.708814 | 0        | 329 |
| Phf5a    | 12.5825  | 3.82718  | 8.26879  | 333 |
| Phactr3  | 14.5283  | 6.66244  | 15.6682  | 342 |
| Phactr1  | 18.7624  | 17.1588  | 21.4692  | 518 |
| Pgrmc2   | 1.32878  | 1.08938  | 1.57327  | 195 |
| Pggt1b   | 6.47628  | 2.66059  | 6.01003  | 355 |
| Pgbd5    | 1.5143   | 2.12644  | 1.57327  | 355 |
| Pfn2     | 41.4727  | 30.6673  | 23.7003  | 343 |
| Per3     | 3.10194  | 0.708814 | 0.957947 | 340 |
| Per2     | 1.5143   | 0        | 2.40564  | 345 |
| Peo1     | 18.023   | 7.60506  | 5.63845  | 511 |
| Peli2    | 8.4863   | 3.75276  | 6.39932  | 181 |
| Pdpk1    | 12.8326  | 9.53279  | 10.272   | 346 |
| Pdp1     | 6.00006  | 10.5419  | 16.2614  | 347 |
| Pdlim5   | 4.88896  | 1.46995  | 1.23065  | 514 |
| Pdgfra   | 50.7393  | 39.6981  | 20.4624  | 343 |
| Pde7b    | 5.11199  | 3.21582  | 7.41109  | 337 |
| Pde5a    | 0.591053 | 1.08938  | 0.615324 | 327 |
| Pde4b    | 25.4537  | 17.1061  | 29.948   | 334 |
| Pdcl     | 36.8625  | 15.3224  | 15.4851  | 350 |
| Pdcl3    | 14.5594  | 14.8323  | 8.68096  | 333 |
| Pdcd7    | 0        | 1.41763  | 0.615324 | 193 |
| Pcyt1a   | 8.7181   | 5.73732  | 5.08399  | 502 |
| Pcdhb3   | 1.77316  | 2.43746  | 2.18859  | 340 |
| Pcdhb18  | 7.75493  | 4.68577  | 5.51656  | 487 |
| Pcdh9    | 161.472  | 141.427  | 111.779  | 491 |
| Pcdh7    | 21.5371  | 18.0453  | 19.6321  | 340 |
| Pcdh17   | 18.3104  | 14.9183  | 9.77748  | 504 |
| Pcdh11x  | 20.4877  | 15.2003  | 7.21861  | 681 |
| Paxip1   | 2.10535  | 0.708814 | 0.615324 | 337 |
| Parp11   | 20.1174  | 9.87366  | 10.9549  | 338 |
| Paqr7    | 1.25544  | 2.12644  | 1.57327  | 361 |
| Pan3     | 0.332194 | 1.08938  | 0.342623 | 330 |
| Pan2     | 1.84649  | 2.17876  | 3.02097  | 182 |
| Pald     | 1.18211  | 0.708814 | 0.342623 | 352 |
| Pak7     | 41.1916  | 19.8829  | 13.874   | 337 |
| Paip1    | 6.08391  | 0.708814 | 1.64319  | 326 |
| Pafah1b2 | 106.627  | 83.5938  | 87.3497  | 341 |
| Pabpc5   | 1.77316  | 0.708814 | 0        | 180 |
| P4hb     | 5.00348  | 0        | 2.87384  | 349 |
| P4ha1    | 13.5674  | 10.343   | 5.93691  | 339 |
| P2rx3    | 1.5143   | 1.7982   | 1.57327  | 335 |
| Oxsr1    | 0.664388 | 0.380568 | 1.82461  | 328 |
| Oxgr1    | 0        | 0        | 0.615324 | 344 |
| Otud6b   | 37.423   | 21.5741  | 23.2017  | 342 |

|          |          |          |          |     |
|----------|----------|----------|----------|-----|
| Otud5    | 2.10535  | 2.83525  | 2.18859  | 499 |
| Otud4    | 0.664388 | 1.85052  | 2.18859  | 333 |
| Osbp18   | 1.97487  | 1.46995  | 0.957947 | 329 |
| Osbp15   | 1.5143   | 1.70074  | 0        | 346 |
| Olig1    | 1.64268  | 0.708814 | 0.342623 | 182 |
| Olfm3    | 56.3156  | 47.0394  | 52.7593  | 341 |
| Ogt      | 37.3626  | 21.9205  | 26.5214  | 338 |
| Ogn      | 0.591053 | 0.761137 | 0        | 336 |
| Ogfod1   | 27.4811  | 23.1523  | 36.2052  | 187 |
| Oas2     | 0.591053 | 0        | 0.615324 | 328 |
| Oas1d    | 0        | 0        | 0.615324 | 327 |
| Nxph4    | 0        | 0        | 0.615324 | 171 |
| Nxpe4    | 1.18211  | 1.72865  | 1.23065  | 348 |
| Nxf1     | 21.326   | 18.0336  | 18.3764  | 183 |
| Nus1     | 4.8751   | 3.54407  | 3.63629  | 339 |
| Nup98    | 4.28194  | 0.708814 | 5.35669  | 338 |
| Nup88    | 17.1996  | 12.9554  | 12.1315  | 349 |
| Nudt16l1 | 2.36421  | 1.46995  | 4.25161  | 340 |
| Nudt10   | 1.91983  | 0        | 0.685246 | 484 |
| Nubp1    | 1.84649  | 0.761137 | 1.84597  | 498 |
| Nub1     | 37.0404  | 27.7607  | 32.7616  | 356 |
| Nts      | 32.8129  | 19.5924  | 10.0374  | 359 |
| Ntrk3    | 16.4066  | 9.57653  | 14.6248  | 335 |
| Ntng1    | 23.5531  | 15.2178  | 25.8083  | 184 |
| Nsun6    | 4.873    | 2.50701  | 4.44711  | 367 |
| Nsmf     | 4.00689  | 0.708814 | 1.20929  | 345 |
| Nsf      | 56.8008  | 74.5861  | 66.8827  | 190 |
| Nsa2     | 26.6233  | 19.9413  | 9.93422  | 343 |
| Nrxn3    | 28.4558  | 16.2648  | 27.3328  | 338 |
| Nrxn1    | 32.8051  | 15.0302  | 14.974   | 349 |
| Nrp1     | 10.1904  | 7.45867  | 2.60114  | 330 |
| Nrip3    | 12.3062  | 13.7004  | 15.2083  | 340 |
| Nrg3     | 0.923247 | 3.59639  | 1.91589  | 344 |
| Nrcam    | 81.6532  | 50.1553  | 53.8012  | 342 |
| Nrbp2    | 1.58764  | 1.46995  | 2.4613   | 659 |
| Nr2c1    | 2.69641  | 3.49894  | 1.91589  | 178 |
| Nr1h5    | 0        | 0.708814 | 0        | 364 |
| Npy1r    | 6.9402   | 2.87035  | 6.07623  | 348 |
| Nphs1    | 0.591053 | 0.380568 | 0.615324 | 867 |
| Npepps   | 2.69641  | 0.708814 | 0.957947 | 177 |
| Npcd     | 10.2763  | 10.0984  | 6.99874  | 526 |
| Npat     | 3.83459  | 4.58832  | 5.43879  | 497 |
| Nov      | 10.4582  | 9.56451  | 5.48226  | 323 |
| Nolc1    | 22.3354  | 8.98406  | 16.794   | 342 |
| Nol6     | 23.0828  | 12.6328  | 9.39515  | 185 |
| Noc3l    | 36.7235  | 22.3047  | 19.7726  | 339 |
| Nnt      | 2.39576  | 2.17876  | 4.48461  | 345 |

|          |          |          |          |     |
|----------|----------|----------|----------|-----|
| Nlrp5-ps | 0.332194 | 1.08938  | 0.342623 | 328 |
| Nln      | 8.20281  | 4.15543  | 2.4613   | 182 |
| Nlgn2    | 1.18211  | 0        | 0.615324 | 335 |
| Nlgn1    | 51.8446  | 35.9608  | 44.8251  | 348 |
| Nkx6-2   | 0        | 0.380568 | 0.615324 | 342 |
| Nktr     | 7.80305  | 3.49894  | 5.59956  | 185 |
| Nip7     | 24.1796  | 9.46869  | 7.56248  | 532 |
| Nhsl1    | 4.70646  | 1.41763  | 2.53122  | 335 |
| Ngfr     | 0.923247 | 0        | 0.615324 | 332 |
| Nfatc3   | 0.591053 | 0.708814 | 0        | 335 |
| Nek7     | 0.923247 | 1.08938  | 1.30057  | 338 |
| Nek1     | 11.5128  | 4.9617   | 7.86635  | 345 |
| Nedd4l   | 27.4849  | 19.9857  | 22.6725  | 346 |
| Nedd1    | 5.10989  | 0.708814 | 1.55647  | 342 |
| Necap1   | 22.1517  | 24.07    | 25.7879  | 494 |
| Necab1   | 57.9103  | 42.439   | 31.0015  | 365 |
| Nebi     | 13.6687  | 24.0916  | 8.99269  | 348 |
| Ndst3    | 24.5613  | 18.5705  | 16.3101  | 340 |
| Ndrp2    | 40.4506  | 30.7619  | 29.7773  | 176 |
| Ncoa3    | 11.1302  | 6.62799  | 4.84558  | 326 |
| Ncoa1    | 0.923247 | 0.380568 | 0.685246 | 175 |
| Nckipso  | 1.18211  | 0.708814 | 0        | 344 |
| Nck2     | 0.923247 | 0        | 0.957947 | 187 |
| Nceh1    | 10.9512  | 6.88968  | 3.93544  | 504 |
| Ncdn     | 39.5872  | 37.1407  | 35.0752  | 180 |
| Ncapg2   | 4.75513  | 1.08938  | 0.615324 | 336 |
| Ncam1    | 130.149  | 73.1811  | 45.8917  | 356 |
| Nbr1     | 26.6814  | 19.3296  | 21.9764  | 354 |
| Nbeal1   | 8.27739  | 4.91657  | 5.65094  | 334 |
| Nbea     | 0.923247 | 0        | 1.23065  | 344 |
| Nat8l    | 0        | 0        | 0.615324 | 182 |
| Narf     | 11.6431  | 4.50039  | 5.9373   | 335 |
| Napg     | 31.0534  | 25.7713  | 28.1359  | 184 |
| Napepld  | 2.36421  | 1.08938  | 0.615324 | 342 |
| Napb     | 72.4415  | 83.0882  | 85.8703  | 343 |
| Napa     | 30.7438  | 31.2188  | 35.836   | 324 |
| Nap1l3   | 9.78327  | 2.12644  | 5.31378  | 351 |
| Naip6    | 0        | 0.708814 | 0.342623 | 360 |
| Nabp1    | 2.23373  | 0        | 0.957947 | 361 |
| N28178   | 6.68134  | 2.55933  | 11.467   | 321 |
| Myl12b   | 32.1609  | 30.3337  | 23.478   | 351 |
| Myh10    | 92.083   | 45.6132  | 43.4884  | 328 |
| Mxra8    | 0.591053 | 0        | 0.615324 | 186 |
| Mxra7    | 0        | 1.70074  | 0        | 187 |
| Mut      | 8.91507  | 2.81803  | 5.4952   | 343 |
| Mum1l1   | 2.18921  | 2.02899  | 0.615324 | 512 |
| Mum1     | 3.24083  | 0.708814 | 1.67692  | 498 |

|          |          |          |          |     |
|----------|----------|----------|----------|-----|
| Mturn    | 6.77064  | 2.17876  | 3.12518  | 179 |
| Mtmr6    | 31.4435  | 27.6643  | 21.134   | 491 |
| Mtmr4    | 4.05827  | 2.88758  | 3.81771  | 342 |
| Mtmr14   | 2.69641  | 0.708814 | 0        | 346 |
| Mtm1     | 9.36915  | 8.73887  | 9.87649  | 181 |
| Mthfsd   | 6.16152  | 4.46645  | 6.23553  | 339 |
| Mthfr    | 3.28746  | 0.380568 | 3.12974  | 352 |
| Mtfr1    | 1.05163  | 1.46995  | 3.81771  | 340 |
| Mterf4   | 3.07997  | 1.85052  | 2.32844  | 337 |
| Mtcp1    | 3.17527  | 4.2989   | 5.71514  | 181 |
| Msantd4  | 22.6494  | 16.5586  | 32.9667  | 174 |
| Mrgprf   | 0.591053 | 0        | 0.615324 | 344 |
| Mras     | 2.76974  | 5.27272  | 5.17393  | 345 |
| Mpv17l   | 12.9062  | 8.4155   | 5.06243  | 495 |
| Mprp     | 0.332194 | 1.14171  | 0.342623 | 357 |
| Mpp5     | 21.4407  | 14.4386  | 28.5397  | 498 |
| Mpp2     | 9.34345  | 3.59639  | 1.57327  | 344 |
| Moxd1    | 0.332194 | 1.08938  | 1.30057  | 492 |
| Mon1b    | 2.30707  | 3.49894  | 2.67834  | 337 |
| Mobp     | 19.856   | 30.2529  | 26.7135  | 326 |
| Mmp19    | 0        | 1.41763  | 0        | 333 |
| Mmp13    | 5.44126  | 0.708814 | 0        | 346 |
| Mmaa     | 3.28746  | 3.92464  | 6.31463  | 184 |
| Mlxip    | 0.923247 | 0        | 0.615324 | 354 |
| Mlst8    | 1.5143   | 1.46995  | 0        | 348 |
| Mllt6    | 0.591053 | 0.761137 | 0.615324 | 365 |
| Mllt3    | 11.1157  | 7.9016   | 4.52432  | 494 |
| Mllt11   | 231.167  | 131.401  | 66.3083  | 353 |
| Mkrn2    | 3.33883  | 1.4004   | 1.84597  | 336 |
| Mkln1    | 39.8091  | 39.9245  | 37.3085  | 649 |
| Mir5123  | 0        | 0        | 1.30057  | 486 |
| Mir468   | 0        | 0        | 0.615324 | 358 |
| Mif      | 29.2373  | 12.4517  | 11.4259  | 225 |
| Mien1    | 18.8837  | 13.9982  | 13.6771  | 188 |
| Mical3   | 17.6076  | 11.6274  | 11.1076  | 502 |
| Mfsd6    | 1.18211  | 0.708814 | 0.957947 | 333 |
| Mfap5    | 2.56593  | 1.32017  | 0        | 178 |
| Mfap3    | 11.3188  | 5.83125  | 6.21417  | 492 |
| Mfap1a   | 72.077   | 49.0659  | 44.8955  | 341 |
| Mettl7a2 | 0.332194 | 0        | 0.685246 | 349 |
| Mettl2   | 0.332194 | 0        | 1.23065  | 360 |
| Mettl21a | 7.66734  | 7.00984  | 8.40893  | 331 |
| Met      | 1.25544  | 1.08938  | 0        | 342 |
| Meis2    | 36.8219  | 12.9997  | 24.3348  | 343 |
| Meis1    | 64.2043  | 33.1861  | 27.7095  | 353 |
| Mef2c    | 36.8838  | 29.9888  | 22.4968  | 345 |
| Mef2a    | 1.84649  | 3.82718  | 2.50986  | 175 |



|             |          |          |          |     |
|-------------|----------|----------|----------|-----|
| Med26       | 0.332194 | 0        | 0.615324 | 496 |
| Mecom       | 12.7439  | 5.22759  | 7.57958  | 653 |
| Mdm4        | 34.3896  | 22.038   | 26.9972  | 328 |
| Mdm2        | 8.70434  | 3.64871  | 3.02097  | 502 |
| Mdh2        | 65.7442  | 49.6565  | 40.7279  | 346 |
| Mctp1       | 2.76974  | 1.08938  | 1.57327  | 335 |
| Mcph1       | 5.22116  | 2.37395  | 4.87931  | 492 |
| Mcm4        | 4.9214   | 2.48979  | 2.60114  | 187 |
| Mbnl1       | 6.08694  | 3.39378  | 6.8916   | 506 |
| Matr3       | 91.7689  | 60.1405  | 54.5292  | 345 |
| Mars2       | 1.18211  | 1.08938  | 0.957947 | 513 |
| Marf1       | 3.0286   | 2.17876  | 2.78256  | 343 |
| March1      | 31.7015  | 17.6003  | 18.0021  | 341 |
| Mapkapk2    | 0        | 2.02899  | 0.615324 | 337 |
| Mapk8ip3    | 42.8272  | 25.7883  | 45.1236  | 343 |
| Mapk8       | 19.5256  | 12.6593  | 8.36103  | 501 |
| Map6        | 29.5338  | 13.7608  | 6.61435  | 506 |
| Map3k13     | 2.95527  | 1.46995  | 1.23065  | 339 |
| Map2        | 45.4493  | 20.4736  | 27.2076  | 348 |
| Map1a       | 48.7739  | 35.8021  | 38.2841  | 337 |
| Man2a1      | 0.332194 | 0        | 1.57327  | 331 |
| Maml3       | 0.591053 | 0        | 1.23065  | 342 |
| Mak         | 0.332194 | 0        | 1.02787  | 330 |
| Magi1       | 17.5342  | 7.33564  | 11.5016  | 184 |
| Mageb16-ps1 | 2.23373  | 1.08938  | 0.615324 | 341 |
| Macrod2     | 16.2494  | 9.90895  | 11.2212  | 332 |
| M6pr        | 9.77993  | 8.37203  | 5.61363  | 333 |
| Lyz2        | 2.06418  | 0.380568 | 0.957947 | 343 |
| Lysmd4      | 4.59427  | 1.7982   | 2.16724  | 326 |
| Ly6e        | 5.03866  | 6.23674  | 5.60784  | 351 |
| Luc7l2      | 3.0286   | 0.708814 | 3.14654  | 348 |
| Lsm6        | 16.2517  | 6.82202  | 8.47221  | 352 |
| Lsm1        | 10.0953  | 4.78703  | 3.39788  | 335 |
| Lrrtm4      | 28.6855  | 20.7939  | 13.0358  | 341 |
| Lrrtm3      | 28.9165  | 17.9733  | 13.1605  | 342 |
| Lrrn4cl     | 0        | 0.708814 | 0        | 344 |
| Lrrfip2     | 1.18211  | 1.08938  | 1.7204   | 335 |
| Lrrcc1      | 7.44493  | 3.26815  | 3.23802  | 500 |
| Lrrc8a      | 1.84649  | 3.03044  | 1.84597  | 339 |
| Lrrc59      | 6.0572   | 1.14171  | 0.685246 | 331 |
| Lrrc40      | 11.4267  | 7.90113  | 9.12757  | 503 |
| Lrp1        | 24.3608  | 13.3551  | 18.812   | 336 |
| Lrp12       | 2.51088  | 1.08938  | 0.685246 | 185 |
| Lrit2       | 0.591053 | 0.708814 | 0        | 340 |
| Lrba        | 1.25544  | 0        | 3.69194  | 496 |
| Lppr5       | 9.92093  | 5.44691  | 3.14654  | 502 |
| Lppr1       | 9.95643  | 1.46995  | 2.18859  | 494 |

|          |          |          |          |      |
|----------|----------|----------|----------|------|
| Lpl      | 6.47325  | 2.12644  | 0        | 338  |
| Lpin1    | 2.85663  | 2.70219  | 4.06633  | 667  |
| Lpar1    | 2.34225  | 1.72865  | 2.18859  | 489  |
| Lonrf2   | 12.6631  | 8.82398  | 9.24413  | 343  |
| Lmod3    | 3.54632  | 2.88758  | 0        | 190  |
| Lmo4     | 18.1361  | 16.4992  | 12.1867  | 351  |
| Lmo3     | 1.77316  | 0.708814 | 0.342623 | 343  |
| Lmln     | 0        | 0.761137 | 0        | 352  |
| Lix1l    | 2.23373  | 0.380568 | 3.14654  | 341  |
| Lipm     | 0        | 0.708814 | 0        | 329  |
| Lincpint | 2.36421  | 5.01402  | 9.43962  | 350  |
| Lin28b   | 1.18211  | 2.12644  | 2.87384  | 188  |
| Limk2    | 10.0746  | 7.60845  | 8.68445  | 492  |
| Limd1    | 0.332194 | 0        | 0.615324 | 495  |
| Lima1    | 13.16    | 6.66193  | 6.2018   | 324  |
| Lhx9     | 3.87851  | 0.708814 | 1.02787  | 348  |
| Lgr4     | 2.10535  | 1.08938  | 1.57327  | 505  |
| Lgalsl   | 20.1525  | 9.06706  | 10.0404  | 332  |
| Leprotl1 | 3.15698  | 0        | 3.02097  | 332  |
| Lepr     | 1.25544  | 1.08938  | 0        | 180  |
| Lef1     | 2.85359  | 5.66901  | 6.2317   | 179  |
| Ldoc1    | 0        | 1.41763  | 0.342623 | 338  |
| Ldlrad3  | 0.996582 | 0.761137 | 0.342623 | 178  |
| Lcp1     | 1.18211  | 0.708814 | 0.615324 | 349  |
| Lclat1   | 8.13001  | 3.52684  | 6.30489  | 340  |
| Lca5     | 6.08875  | 2.56178  | 2.50986  | 338  |
| Laptm5   | 0.664388 | 1.01984  | 2.53122  | 1771 |
| Lancl2   | 3.95185  | 3.92464  | 0.957947 | 341  |
| Lamtor3  | 15.0975  | 10.6355  | 10.1184  | 180  |
| l7Rn6    | 15.0005  | 8.18167  | 12.338   | 336  |
| Ksr2     | 0.591053 | 1.08938  | 1.57327  | 492  |
| Kpnb1    | 1.25544  | 0        | 0.866667 | 329  |
| Kpna6    | 16.5377  | 10.4724  | 9.61812  | 342  |
| Kpna1    | 34.4507  | 23.7082  | 40.681   | 339  |
| Knop1    | 18.4521  | 14.2827  | 8.7822   | 497  |
| Kndc1    | 2.10535  | 1.85052  | 0.685246 | 190  |
| Klhl29   | 0.827951 | 1.46995  | 0.342623 | 339  |
| Klhl28   | 14.3128  | 5.15804  | 10.1593  | 183  |
| Klhl23   | 15.9227  | 7.09914  | 2.95104  | 346  |
| Klhl20   | 2.85663  | 2.50701  | 2.53122  | 501  |
| Klhl17   | 1.5143   | 0        | 0.615324 | 326  |
| Klhl15   | 0        | 0.380568 | 2.80392  | 336  |
| Klhdc7a  | 0        | 0        | 1.84597  | 333  |
| Klf12    | 2.10535  | 0.708814 | 0.615324 | 350  |
| Kif5c    | 19.7464  | 10.879   | 19.0533  | 341  |
| Kif3a    | 34.9238  | 23.4795  | 15.0438  | 332  |
| Kif26b   | 2.34225  | 0.380568 | 0.615324 | 186  |

|           |          |          |          |     |
|-----------|----------|----------|----------|-----|
| Kif24     | 3.30365  | 0        | 0.685246 | 355 |
| Kif21b    | 4.46957  | 0.761137 | 0.342623 | 522 |
| Kif16b    | 1.25544  | 0.708814 | 0        | 510 |
| Kidins220 | 50.4585  | 28.7835  | 26.5168  | 342 |
| Khdrbs3   | 6.45464  | 6.9658   | 7.98238  | 356 |
| Khdrbs1   | 11.9937  | 7.75598  | 3.41924  | 498 |
| Kdm4a     | 47.5442  | 31.1551  | 25.7018  | 335 |
| Kdm2a     | 1.5143   | 0        | 1.91589  | 352 |
| Kdm1b     | 5.57206  | 1.08938  | 0.615324 | 346 |
| Kdelr2    | 0.664388 | 0.761137 | 0        | 194 |
| Kdelc2    | 1.99316  | 1.14171  | 1.91589  | 338 |
| Kctd5     | 8.16256  | 6.43165  | 8.28618  | 337 |
| Kctd13    | 1.5143   | 0        | 0.685246 | 344 |
| Kctd10    | 1.77316  | 0        | 2.80392  | 509 |
| Kcns3     | 0.332194 | 0.380568 | 1.23065  | 337 |
| Kcnk2     | 16.7614  | 11.3031  | 6.6189   | 351 |
| Kcnj9     | 9.17026  | 3.04882  | 11.953   | 510 |
| Kcnj6     | 12.1262  | 10.5688  | 10.4986  | 516 |
| Kcnj2     | 0.923247 | 0.708814 | 0        | 337 |
| Kcnj12    | 0        | 0        | 0.615324 | 188 |
| Kcnj10    | 3.61965  | 4.536    | 3.02097  | 341 |
| Kcng4     | 0.664388 | 0        | 0.615324 | 339 |
| Kcnd2     | 12.4466  | 12.4376  | 15.5588  | 501 |
| Kcnc3     | 1.77316  | 0        | 2.4613   | 322 |
| Kazn      | 2.43755  | 0.708814 | 1.30057  | 341 |
| Kat7      | 7.39775  | 3.92464  | 6.25377  | 511 |
| Kank1     | 2.69641  | 0.761137 | 1.84597  | 176 |
| Jmjd4     | 1.5143   | 1.08938  | 0.342623 | 334 |
| Jarid2    | 45.3482  | 23.8393  | 17.7282  | 342 |
| Jam2      | 5.52119  | 4.30521  | 3.14654  | 516 |
| Jakmip3   | 2.60111  | 2.55933  | 3.14654  | 493 |
| Jade3     | 0.664388 | 1.41763  | 0.615324 | 514 |
| Itpr2     | 9.9246   | 4.3403   | 2.53122  | 339 |
| Itpr1     | 7.87441  | 10.2303  | 15.0305  | 499 |
| Itpkb     | 0.591053 | 0.708814 | 2.16724  | 363 |
| Itm2b     | 56.4382  | 31.0177  | 56.6769  | 344 |
| Itk       | 0        | 0.708814 | 0        | 518 |
| Itih2     | 2.69641  | 1.41763  | 0.615324 | 190 |
| Itgb1     | 14.8626  | 6.33419  | 2.31436  | 338 |
| Isy1      | 25.7916  | 20.5065  | 16.4727  | 179 |
| Ist1      | 28.0587  | 15.4522  | 18.8906  | 346 |
| Iqsec1    | 4.41242  | 3.21582  | 5.67776  | 347 |
| Iqgap1    | 17.5985  | 6.46336  | 5.88073  | 517 |
| Iqcg      | 1.7512   | 0        | 1.30057  | 348 |
| Ipo9      | 15.9504  | 15.0415  | 13.0637  | 335 |
| Ipo4      | 6.31606  | 3.59639  | 4.59424  | 497 |
| Ipcef1    | 11.67    | 15.0119  | 16.3891  | 338 |

|          |          |          |          |     |
|----------|----------|----------|----------|-----|
| Ip6k1    | 0        | 2.17876  | 0.685246 | 349 |
| Ints12   | 6.24202  | 3.92464  | 2.16724  | 325 |
| Ints10   | 14.9298  | 12.8244  | 10.5645  | 197 |
| Inpp5e   | 2.43755  | 2.83525  | 2.53122  | 480 |
| Inpp5b   | 2.69641  | 0.708814 | 0.957947 | 184 |
| Ino80c   | 4.05827  | 1.7982   | 2.50986  | 342 |
| Ing3     | 12.7688  | 17.1646  | 7.51545  | 334 |
| Impact   | 66.5208  | 64.8043  | 92.9104  | 179 |
| Impa1    | 16.075   | 14.108   | 14.2013  | 500 |
| Imp4     | 1.77316  | 1.32017  | 1.84597  | 180 |
| Immt     | 16.9725  | 14.2343  | 13.977   | 330 |
| Il33     | 6.57289  | 3.21582  | 11.464   | 179 |
| Il1rap   | 6.27247  | 9.73042  | 11.3971  | 510 |
| Ikzf4    | 0.591053 | 1.08938  | 1.84597  | 340 |
| Ikake    | 0        | 0        | 1.84597  | 343 |
| Ikakb    | 6.75322  | 4.19053  | 3.29367  | 327 |
| Ilgp1    | 0        | 0        | 2.21015  | 357 |
| Igsf6    | 2.23373  | 3.14628  | 0.615324 | 506 |
| Igf2     | 4.14757  | 1.46995  | 0.615324 | 504 |
| Ift80    | 7.28351  | 4.74957  | 6.66943  | 347 |
| Ifi203   | 8.39945  | 6.03385  | 0.615324 | 833 |
| Ier5     | 2.95527  | 2.02899  | 2.80392  | 347 |
| Iid1     | 19.4423  | 14.3304  | 14.2456  | 338 |
| Ica1l    | 2.10535  | 1.08938  | 3.48916  | 340 |
| Ibtk     | 3.52436  | 0.761137 | 2.16724  | 349 |
| Iah1     | 2.17869  | 3.08276  | 3.05526  | 185 |
| Iykk     | 0.591053 | 0.708814 | 0.957947 | 334 |
| Ius1     | 3.98493  | 0.708814 | 3.63629  | 514 |
| Iunk     | 0.827951 | 1.89946  | 1.30057  | 333 |
| Ispa12a  | 9.50467  | 4.45879  | 5.48226  | 344 |
| Isf2     | 6.32658  | 3.59639  | 2.51441  | 338 |
| Isd1     | 3.69089  | 3.26815  | 3.90899  | 325 |
| Ist2     | 4.48576  | 1.7982   | 1.91589  | 499 |
| Irasls   | 4.83484  | 3.21582  | 6.73446  | 494 |
| Ips3     | 4.24379  | 2.16154  | 2.69128  | 176 |
| Ip1bp3   | 38.4384  | 22.643   | 30.5601  | 328 |
| Ioxc13   | 1.26596  | 1.01984  | 0.342623 | 336 |
| Ihrnpdl  | 59.5594  | 37.561   | 37.3224  | 329 |
| Ih1l     | 3.72515  | 2.17876  | 1.84597  | 340 |
| Ihgn3    | 165.26   | 130.033  | 98.4936  | 185 |
| Ihgcr    | 7.96894  | 4.64064  | 3.29367  | 349 |
| Ihg20a   | 73.3488  | 42.8212  | 46.6214  | 493 |
| Ihp1     | 1.7512   | 2.12644  | 3.96211  | 328 |
| Ih1a     | 5.16704  | 4.23566  | 2.80392  | 357 |
| Iiat1    | 3.0286   | 0        | 0.615324 | 357 |
| Ihe      | 0        | 0        | 0.615324 | 187 |
| Iherpud1 | 5.84558  | 3.03044  | 6.49216  | 342 |

|          |          |          |          |     |
|----------|----------|----------|----------|-----|
| Hecw1    | 15.9981  | 15.0604  | 6.7952   | 350 |
| Heca     | 0.332194 | 1.41763  | 0        | 328 |
| Heatr6   | 0.996582 | 1.7982   | 4.93686  | 330 |
| Heatr1   | 1.58764  | 2.10922  | 1.57327  | 168 |
| Hdx      | 10.3614  | 6.8404   | 9.98836  | 342 |
| Hdlbp    | 26.921   | 20.6862  | 13.5474  | 340 |
| Hcrtr2   | 1.18211  | 0.708814 | 0        | 333 |
| Hbs1l    | 14.2267  | 7.40635  | 10.0587  | 184 |
| Hapln2   | 0.591053 | 2.10922  | 5.95521  | 361 |
| Hadha    | 45.6133  | 36.7025  | 24.2819  | 344 |
| H2afj    | 4.90818  | 3.97696  | 4.32154  | 349 |
| H19      | 23.0831  | 12.9694  | 1.23065  | 484 |
| Gvin1    | 3.19216  | 2.55933  | 9.77346  | 344 |
| Gtpbp1   | 1.25544  | 2.40956  | 0.957947 | 329 |
| Gtf3c1   | 7.67638  | 8.91238  | 8.51985  | 181 |
| Gtf2h5   | 21.6025  | 14.8556  | 11.485   | 332 |
| Gsr      | 0.923247 | 0        | 1.84597  | 328 |
| Gspt2    | 1.25544  | 2.50701  | 3.94329  | 183 |
| Grsf1    | 11.8778  | 7.61876  | 14.1005  | 332 |
| Grpel1   | 45.9192  | 29.3716  | 28.2661  | 349 |
| Grip1    | 6.03524  | 1.46995  | 4.37719  | 169 |
| Grik5    | 1.77316  | 1.08938  | 2.53122  | 168 |
| Grik2    | 5.64965  | 4.30521  | 3.29367  | 332 |
| Gria4    | 45.1814  | 40.0595  | 38.492   | 336 |
| Gria1    | 135.074  | 84.8834  | 125.104  | 354 |
| Greb1l   | 1.5143   | 0        | 2.18859  | 344 |
| Gpr88    | 5.06062  | 1.08938  | 2.43994  | 351 |
| Gpr26    | 38.0691  | 11.9668  | 22.3858  | 336 |
| Gpr183   | 0        | 0        | 0.615324 | 184 |
| Gpr17    | 15.9503  | 12.1216  | 0        | 348 |
| Gpr155   | 5.61913  | 2.55933  | 2.69128  | 350 |
| Gpr126   | 0        | 0        | 0.957947 | 346 |
| Gpr101   | 1.16015  | 0.708814 | 1.10507  | 339 |
| Gpm6b    | 504.18   | 403.875  | 419.369  | 184 |
| Gpm6a    | 322.55   | 272.761  | 190.649  | 348 |
| Gpd2     | 8.04595  | 3.11837  | 5.31378  | 500 |
| Gpc1     | 0.591053 | 0        | 0.957947 | 494 |
| Gpbp1    | 34.3254  | 26.0554  | 28.7894  | 331 |
| Gpatch2l | 3.52436  | 1.32017  | 2.18859  | 334 |
| Gpaa1    | 1.77316  | 0        | 0.866667 | 189 |
| Golph3   | 5.00173  | 4.63761  | 4.33307  | 188 |
| Golm1    | 9.04695  | 2.98884  | 2.90757  | 485 |
| Golga1   | 21.3365  | 13.4441  | 14.1312  | 351 |
| Gnpnat1  | 6.89357  | 2.66059  | 4.06906  | 494 |
| Gnl3l    | 79.079   | 71.267   | 79.2942  | 343 |
| Gne      | 5.37085  | 1.08938  | 3.12518  | 344 |
| Gnas     | 31.1472  | 24.0817  | 29.843   | 186 |

|         |          |          |          |      |
|---------|----------|----------|----------|------|
| Gnal    | 18.4252  | 5.06634  | 8.73757  | 491  |
| Gnai3   | 8.24965  | 8.49573  | 8.00226  | 331  |
| Gmfb    | 79.0087  | 52.12    | 51.3872  | 492  |
| Gm9776  | 1.18211  | 1.41763  | 0        | 348  |
| Gm8898  | 22.0404  | 15.9329  | 13.173   | 333  |
| Gm8615  | 2.36421  | 1.7982   | 1.64319  | 341  |
| Gm7854  | 0.591053 | 0        | 0.615324 | 172  |
| Gm5464  | 0        | 0        | 0.615324 | 499  |
| Gm5113  | 3.28746  | 2.43746  | 1.57327  | 344  |
| Gm4981  | 0        | 0        | 0.615324 | 188  |
| Gm4944  | 2.43755  | 2.12644  | 1.23065  | 330  |
| Gm4724  | 50.3501  | 37.5251  | 34.3871  | 179  |
| Gm21119 | 5.77638  | 1.46995  | 12.726   | 333  |
| Gm20337 | 0        | 0        | 0.957947 | 353  |
| Gm20199 | 2.76974  | 2.50701  | 5.51656  | 504  |
| Gm19522 | 0.923247 | 0        | 2.18859  | 513  |
| Gm16023 | 2.10535  | 1.7982   | 0.615324 | 344  |
| Gm15800 | 2.67445  | 1.08938  | 1.30057  | 351  |
| Gm14405 | 1.32878  | 0        | 1.71311  | 1635 |
| Gm13251 | 0        | 1.41763  | 1.23065  | 691  |
| Gm10653 | 0        | 0.708814 | 0        | 183  |
| Gm10649 | 2.10535  | 2.12644  | 1.57327  | 180  |
| Gm10406 | 0.332194 | 0.708814 | 0.685246 | 339  |
| Gm10336 | 1.97487  | 1.7982   | 2.67834  | 343  |
| Gm10033 | 15.4938  | 9.16341  | 13.8294  | 321  |
| Glul    | 72.6579  | 59.8381  | 96.8042  | 335  |
| Gltp    | 5.60565  | 3.90741  | 1.64319  | 327  |
| Glrx5   | 1.18211  | 1.41763  | 1.57327  | 195  |
| Glrx3   | 27.4124  | 16.9441  | 16.3409  | 337  |
| Glrx    | 14.8788  | 13.5279  | 7.68394  | 330  |
| Glrx2   | 7.23931  | 3.1986   | 4.37719  | 357  |
| Glb1l2  | 0.332194 | 0        | 0.957947 | 346  |
| Gla     | 1.38382  | 1.7982   | 2.43994  | 346  |
| Gjc3    | 8.5786   | 7.62944  | 10.5093  | 330  |
| Git2    | 2.76974  | 3.49894  | 1.30057  | 182  |
| Gimap8  | 0.591053 | 0        | 1.23065  | 365  |
| Gimap6  | 9.80375  | 4.36145  | 2.96398  | 336  |
| Gga2    | 0        | 0.708814 | 0.615324 | 342  |
| Gfra1   | 1.7512   | 1.08938  | 3.07662  | 357  |
| Gemin8  | 0.996582 | 0.380568 | 0.957947 | 683  |
| Gdpd5   | 0        | 1.72865  | 0.342623 | 340  |
| Gdpd1   | 12.2241  | 8.07352  | 8.36574  | 507  |
| Gdap2   | 3.67103  | 5.70805  | 3.88763  | 180  |
| Gdap1   | 22.5747  | 10.7262  | 16.0644  | 331  |
| Gda     | 17.6731  | 17.1237  | 11.6978  | 660  |
| Gcnt4   | 0.664388 | 1.08938  | 0.342623 | 335  |
| Gbp6    | 0.591053 | 0        | 0.957947 | 361  |

|          |          |          |          |     |
|----------|----------|----------|----------|-----|
| Gbp4     | 0.664388 | 1.41763  | 0        | 510 |
| Gatsl3   | 0        | 0        | 0.615324 | 346 |
| Gatsl2   | 3.15698  | 1.08938  | 0.615324 | 340 |
| Gatad2a  | 0        | 0.761137 | 2.53122  | 500 |
| Ganab    | 11.1841  | 7.20954  | 7.37153  | 165 |
| Gal3st3  | 13.7841  | 8.40592  | 7.66187  | 177 |
| Gad2     | 8.06726  | 9.03992  | 5.04108  | 348 |
| Gabrb3   | 17.6249  | 9.92815  | 8.77281  | 350 |
| Gaa      | 5.7658   | 8.78234  | 11.2282  | 335 |
| Fyttd1   | 20.0418  | 12.2654  | 13.1879  | 326 |
| Fyn      | 2.51088  | 1.4004   | 3.29367  | 350 |
| Fyb      | 0        | 0.708814 | 0        | 333 |
| Fuom     | 2.44806  | 3.9794   | 3.86552  | 336 |
| Ftsj1    | 1.25544  | 1.7982   | 4.01264  | 180 |
| Fry      | 23.7067  | 10.3914  | 23.0041  | 330 |
| Frs2     | 15.8294  | 12.1159  | 11.7915  | 339 |
| Fpgt     | 4.57598  | 1.08938  | 4.48084  | 334 |
| Foxn2    | 1.84649  | 1.14171  | 0        | 336 |
| Foxl1    | 1.419    | 2.02899  | 0.342623 | 183 |
| Foxj2    | 0        | 0.708814 | 0.685246 | 178 |
| Fnip2    | 0        | 0.708814 | 0        | 666 |
| Fmnl2    | 3.54632  | 0.708814 | 1.23065  | 339 |
| Fmn2     | 8.14224  | 1.70074  | 7.87     | 486 |
| Flt1     | 1.18211  | 0        | 0.615324 | 504 |
| Flrt2    | 3.41584  | 2.17876  | 2.17179  | 489 |
| Flrt1    | 0.332194 | 3.21582  | 1.98581  | 333 |
| Fkbp5    | 0.332194 | 0.708814 | 0.957947 | 352 |
| Fkbp10   | 2.60111  | 0.708814 | 0        | 346 |
| Fgfr1op2 | 22.4426  | 23.7493  | 33.6612  | 346 |
| Fgf14    | 77.3612  | 63.4631  | 69.1356  | 342 |
| Fgf10    | 2.76974  | 1.7982   | 2.53122  | 361 |
| Fez2     | 11.9042  | 5.19968  | 7.4372   | 183 |
| Fem1b    | 4.00689  | 0        | 2.87384  | 344 |
| Fcho1    | 8.78933  | 3.04116  | 5.2475   | 182 |
| Fbxw2    | 8.25278  | 5.62538  | 8.06913  | 332 |
| Fbxo3    | 16.4087  | 14.6692  | 11.6852  | 340 |
| Fbxo31   | 0.996582 | 1.7982   | 2.87384  | 341 |
| Fbxo27   | 0        | 0        | 1.57327  | 340 |
| Fbxl22   | 0.591053 | 0        | 0.615324 | 341 |
| Fbxl16   | 0        | 0.708814 | 0        | 335 |
| Fbxl14   | 0        | 0        | 0.615324 | 342 |
| Fbf1     | 15.0988  | 6.3621   | 10.2581  | 330 |
| Farp1    | 3.91067  | 1.08938  | 1.57327  | 177 |
| Far2     | 22.7496  | 12.7062  | 8.70895  | 502 |
| Fam84b   | 0        | 0        | 0.615324 | 185 |
| Fam49b   | 3.94975  | 2.23109  | 5.02427  | 345 |
| Fam45a   | 17.9745  | 15.3796  | 19.7739  | 340 |

|          |          |          |          |     |
|----------|----------|----------|----------|-----|
| Fam3a    | 7.93678  | 4.58832  | 4.99251  | 348 |
| Fam228b  | 0        | 0        | 0.615324 | 360 |
| Fam228a  | 0        | 0        | 1.57327  | 330 |
| Fam19a2  | 5.52291  | 4.48783  | 3.70502  | 344 |
| Fam175a  | 0.923247 | 1.08938  | 2.13294  | 331 |
| Fam172a  | 29.6865  | 19.2596  | 17.4181  | 345 |
| Fam169a  | 3.95185  | 0.380568 | 3.41924  | 336 |
| Fam168b  | 0.591053 | 1.08938  | 1.84597  | 323 |
| Fam160b2 | 0.923247 | 2.81803  | 1.82461  | 352 |
| Fam160b1 | 1.25544  | 0.708814 | 0.615324 | 512 |
| Fam159b  | 0        | 0.380568 | 0.615324 | 358 |
| Fam149a  | 0.923247 | 0.708814 | 0.615324 | 353 |
| Fam133b  | 58.0187  | 38.5485  | 43.0107  | 504 |
| Fam131b  | 0.332194 | 0.708814 | 0.685246 | 497 |
| Fam124b  | 0.591053 | 0        | 0.615324 | 193 |
| Fam122b  | 2.95527  | 1.41763  | 3.69194  | 347 |
| Fam120b  | 10.6636  | 4.88096  | 10.2182  | 321 |
| Fam102b  | 0        | 0.708814 | 0.342623 | 170 |
| Fads3    | 1.5143   | 2.17876  | 0.342623 | 339 |
| Fadd     | 0.591053 | 0.380568 | 0.615324 | 494 |
| Eya1     | 3.0286   | 0        | 0.615324 | 186 |
| Exosc4   | 3.15698  | 0        | 0.615324 | 180 |
| Exoc2    | 10.9885  | 7.77353  | 13.5908  | 175 |
| Ewsr1    | 19.7819  | 16.0701  | 21.9448  | 506 |
| Evl      | 6.90712  | 2.88758  | 1.57327  | 175 |
| Evc      | 0.332194 | 0.380568 | 0.615324 | 347 |
| Etohi1   | 15.6009  | 13.7535  | 13.7751  | 515 |
| Etf1     | 15.5854  | 13.6243  | 11.4302  | 332 |
| Errfi1   | 0.923247 | 1.08938  | 0        | 344 |
| Ernm     | 31.8501  | 52.6838  | 127.5    | 344 |
| Eri2     | 3.00664  | 1.41763  | 0.957947 | 339 |
| Erbp2ip  | 5.44419  | 4.61623  | 6.34893  | 348 |
| Ephb1    | 13.9944  | 5.1676   | 5.08399  | 354 |
| Epha5    | 7.31054  | 0.761137 | 2.53122  | 339 |
| Epc2     | 7.58537  | 2.50701  | 3.7956   | 343 |
| Epb4.2   | 0        | 0        | 0.615324 | 353 |
| Epb4.1l1 | 3.19216  | 2.79012  | 3.41924  | 514 |
| Entpd7   | 1.64268  | 0.708814 | 2.09731  | 378 |
| Entpd5   | 3.28746  | 2.83525  | 4.10449  | 344 |
| Enpp6    | 5.29752  | 4.23566  | 1.64319  | 332 |
| Enox2    | 1.58764  | 0.708814 | 0.615324 | 349 |
| Engase   | 1.25544  | 0.708814 | 0        | 181 |
| Endod1   | 1.84649  | 1.08938  | 0        | 333 |
| Emp2     | 4.72265  | 1.14171  | 0.342623 | 176 |
| Emp1     | 1.64268  | 1.7982   | 0.615324 | 502 |
| Eltd1    | 6.87247  | 6.61205  | 6.48724  | 337 |
| Elp4     | 3.49969  | 3.21582  | 2.58706  | 489 |



|               |          |          |          |     |
|---------------|----------|----------|----------|-----|
| Elmsan1       | 0        | 0.761137 | 0.615324 | 328 |
| Ell2          | 0.664388 | 0        | 1.23065  | 339 |
| Elk3          | 6.3894   | 1.85052  | 0.685246 | 343 |
| Elavl2        | 63.7417  | 33.9555  | 30.142   | 340 |
| Elavl1        | 0        | 0        | 0.615324 | 682 |
| Eif4g2        | 14.1022  | 4.93816  | 4.33903  | 343 |
| Eif4ebp2      | 0.332194 | 1.41763  | 0.342623 | 326 |
| Eif4e2        | 40.1464  | 20.6969  | 13.7754  | 498 |
| Eif4b         | 11.1803  | 2.17876  | 2.40564  | 510 |
| Eif3j2        | 2.58422  | 2.87035  | 0.342623 | 359 |
| Eid2b         | 2.10535  | 1.72865  | 0        | 335 |
| Eid1          | 69.0444  | 32.5016  | 31.2605  | 347 |
| Ehd4          | 0        | 0.708814 | 0        | 365 |
| Ehd3          | 1.77316  | 0.761137 | 1.57327  | 348 |
| Ehbp1         | 5.46615  | 3.64871  | 1.91589  | 368 |
| Egfr          | 3.06168  | 0        | 0.957947 | 181 |
| Egfem1        | 3.28746  | 1.85052  | 3.14654  | 518 |
| Efcab2        | 5.02808  | 5.1676   | 4.65441  | 340 |
| Eef2k         | 2.69641  | 0.708814 | 0.615324 | 348 |
| Eef1a1        | 11.547   | 5.67466  | 5.71225  | 333 |
| Edrf1         | 3.8947   | 1.7982   | 1.23065  | 353 |
| Edil3         | 10.4696  | 5.39459  | 13.6732  | 509 |
| Ect2          | 1.77316  | 0.380568 | 0.615324 | 515 |
| Eci2          | 8.05582  | 3.54407  | 4.87931  | 171 |
| E130311K13Rik | 3.24628  | 4.8963   | 1.91589  | 200 |
| E130307A14Rik | 6.2941   | 0.761137 | 5.04108  | 490 |
| Dyrk1a        | 3.54632  | 1.08938  | 3.39788  | 503 |
| Dynll1        | 63.4819  | 44.1952  | 32.2682  | 656 |
| Dut           | 7.50775  | 2.48979  | 1.37049  | 323 |
| Dusp8         | 1.25544  | 0.380568 | 0.615324 | 346 |
| Dusp27        | 0        | 0        | 0.615324 | 354 |
| Dusp18        | 3.52436  | 2.12644  | 1.91589  | 349 |
| Dusp16        | 0        | 0        | 0.685246 | 341 |
| Duox1         | 0        | 0.708814 | 0        | 356 |
| Dtl           | 1.84649  | 0.708814 | 0        | 178 |
| Dtd2          | 2.53549  | 2.02899  | 1.98581  | 499 |
| Drp2          | 5.66786  | 3.87951  | 5.09692  | 336 |
| Drd1a         | 3.61965  | 3.21582  | 1.91589  | 348 |
| Dpy1911       | 0.332194 | 0.708814 | 1.91589  | 192 |
| Dpp8          | 8.78459  | 2.99222  | 4.59424  | 333 |
| Dpm1          | 18.7305  | 15.4614  | 19.8179  | 335 |
| Dph6          | 22.8372  | 17.4502  | 17.6904  | 360 |
| Dpf3          | 3.44465  | 0.380568 | 1.57327  | 499 |
| Dock3         | 0.332194 | 0.761137 | 1.82461  | 330 |
| Dock11        | 2.67445  | 1.08938  | 0.685246 | 189 |
| Dnm3          | 21.8995  | 11.4251  | 14.9416  | 338 |
| Dnm2          | 17.6988  | 12.0322  | 14.4006  | 336 |

|         |          |          |          |     |
|---------|----------|----------|----------|-----|
| Dnajc3  | 2.65523  | 1.41763  | 0        | 349 |
| Dnajc16 | 3.65274  | 4.82864  | 4.92279  | 345 |
| Dnajb5  | 5.16494  | 5.34226  | 1.91589  | 356 |
| Dnajb4  | 39.3639  | 29.5988  | 38.5225  | 324 |
| Dnaja4  | 3.82137  | 3.52684  | 5.80808  | 333 |
| Dnaja1  | 221.396  | 145.055  | 112.334  | 337 |
| Dlx5    | 1.7512   | 0.708814 | 1.57327  | 180 |
| Dlst    | 5.52119  | 5.04912  | 2.60114  | 345 |
| Dlg3    | 4.41242  | 8.27525  | 2.50986  | 334 |
| Dleu7   | 1.05163  | 0.761137 | 1.10507  | 190 |
| Dlc1    | 19.6415  | 8.77166  | 9.452    | 509 |
| Dlat    | 9.18623  | 7.54921  | 3.12518  | 333 |
| Dixdc1  | 3.94975  | 1.41763  | 3.12462  | 348 |
| Dio2    | 23.8168  | 25.6674  | 12.9333  | 347 |
| Dicer1  | 0.332194 | 0.380568 | 0.685246 | 334 |
| Diablo  | 2.3804   | 3.95974  | 3.41612  | 342 |
| Dhrs9   | 0        | 0        | 0.615324 | 353 |
| Dhfr    | 3.72607  | 0        | 0.615324 | 346 |
| Dgkg    | 2.21177  | 1.46995  | 3.12974  | 192 |
| Dgke    | 2.10535  | 1.72865  | 0.615324 | 342 |
| Derl2   | 11.1737  | 5.808    | 9.7425   | 341 |
| Derl1   | 4.15356  | 1.08938  | 4.90123  | 338 |
| Depdc5  | 10.5274  | 6.96227  | 7.22868  | 342 |
| Dennd6a | 2.26254  | 1.41763  | 1.91589  | 500 |
| Degs2   | 0        | 0        | 0.615324 | 499 |
| Dedd    | 2.58422  | 1.46995  | 1.57327  | 335 |
| Decr2   | 2.17869  | 1.14171  | 1.20929  | 490 |
| Ddx55   | 3.0286   | 5.55583  | 4.71981  | 181 |
| Ddx3y   | 38.0174  | 27.3335  | 36.26    | 662 |
| Ddx3x   | 29.8942  | 21.472   | 26.7146  | 493 |
| Ddx19b  | 6.21866  | 1.46995  | 3.41924  | 322 |
| Ddx11   | 2.82479  | 0.761137 | 0.342623 | 498 |
| Ddi2    | 0.591053 | 0.380568 | 0.615324 | 491 |
| Dcun1d4 | 17.1097  | 15.1048  | 13.1342  | 521 |
| Dcun1d2 | 4.33909  | 2.48979  | 1.57327  | 333 |
| Dctn4   | 27.2948  | 13.789   | 20.4492  | 501 |
| Dclre1c | 13.2472  | 14.5105  | 11.8148  | 338 |
| Dclk3   | 1.97487  | 0        | 1.82461  | 187 |
| Dclk2   | 0        | 0        | 0.615324 | 323 |
| Dbnidd2 | 6.49956  | 7.03813  | 8.52905  | 338 |
| Dbnidd1 | 1.25544  | 0.708814 | 0        | 354 |
| Dbhos   | 0.591053 | 0.708814 | 0.615324 | 340 |
| Dazap2  | 20.1904  | 16.2683  | 18.4032  | 340 |
| Dapp1   | 0.591053 | 0.708814 | 1.23065  | 185 |
| Dapl1   | 0        | 0.708814 | 0        | 185 |
| Dagla   | 0.591053 | 0.380568 | 1.23065  | 529 |
| Dad1    | 79.1878  | 53.1424  | 43.118   | 342 |

|               |          |          |          |     |
|---------------|----------|----------|----------|-----|
| Dab2ip        | 2.69641  | 2.08131  | 4.37719  | 489 |
| Dab1          | 6.89628  | 5.70561  | 10.1065  | 359 |
| D7Ertd715e    | 125.553  | 89.2302  | 77.6616  | 343 |
| D630039A03Rik | 0        | 0.708814 | 0        | 180 |
| D3Ertd254e    | 22.855   | 11.7678  | 15.6151  | 677 |
| D2hgdh        | 2.10535  | 0.708814 | 3.07662  | 343 |
| D230025D16Rik | 2.5214   | 1.41763  | 2.78256  | 487 |
| D10Wsu102e    | 8.20281  | 6.00595  | 4.13822  | 334 |
| D10Bwg1379e   | 6.61759  | 2.88758  | 6.2848   | 338 |
| D030025E07Rik | 0.591053 | 0.708814 | 0        | 340 |
| Cyp51         | 26.7261  | 11.9154  | 8.94072  | 485 |
| Cyp3a11       | 0        | 0        | 0.615324 | 178 |
| Cyp2s1        | 0        | 0.380568 | 1.57327  | 339 |
| Cyp2j6        | 4.9214   | 6.59289  | 5.31378  | 350 |
| Cyp2ab1       | 0        | 0.708814 | 0        | 523 |
| Cyfip1        | 5.12586  | 6.31941  | 3.63629  | 181 |
| Cybb          | 0        | 0        | 0.615324 | 335 |
| Cyb5d2        | 1.7512   | 0.380568 | 1.23065  | 339 |
| Cx3cl1        | 40.7785  | 41.528   | 37.9196  | 172 |
| Cwf19l2       | 58.8947  | 33.9235  | 39.661   | 355 |
| Cwf19l1       | 7.34573  | 3.21582  | 6.34836  | 340 |
| Cwc25         | 32.8332  | 20.9653  | 21.6844  | 502 |
| Cul5          | 3.95185  | 1.41763  | 3.97891  | 498 |
| Cuedc1        | 1.18211  | 0        | 0.615324 | 343 |
| Cttnbp2       | 18.3574  | 17.3321  | 20.3848  | 341 |
| Ctso          | 1.77316  | 3.87951  | 4.90123  | 329 |
| Ctsl          | 20.7446  | 15.7641  | 9.0848   | 498 |
| Ctsb          | 52.5669  | 49.588   | 45.0618  | 346 |
| Ctdsp1        | 0.591053 | 0        | 0.615324 | 337 |
| Ctdnep1       | 0.996582 | 0        | 1.57327  | 187 |
| Cstf2t        | 66.1075  | 43.1037  | 44.668   | 344 |
| Cstf2         | 23.5208  | 10.8653  | 9.67844  | 345 |
| Cst6          | 0        | 0        | 2.09731  | 489 |
| Csrnp2        | 0        | 1.7982   | 0.615324 | 348 |
| Csmd3         | 89.0323  | 55.4707  | 58.9622  | 493 |
| Csf1r         | 7.37495  | 5.34226  | 2.40564  | 349 |
| Csdc2         | 8.02334  | 3.59639  | 5.5281   | 335 |
| Crtc3         | 0.591053 | 0        | 0.957947 | 518 |
| Crispld1      | 0.591053 | 0.708814 | 1.23065  | 347 |
| Crem          | 5.31371  | 7.25658  | 6.98561  | 495 |
| Crebl2        | 0        | 2.50701  | 1.30057  | 354 |
| Crbn          | 63.3917  | 72.1921  | 70.7766  | 338 |
| Cramp1l       | 0.591053 | 0        | 0.957947 | 346 |
| Cptp          | 5.50127  | 4.46645  | 4.26455  | 348 |
| Cpne3         | 1.18211  | 1.46995  | 1.30057  | 501 |
| Coq9          | 2.17869  | 5.08849  | 4.46866  | 348 |
| Coq3          | 10.6882  | 7.52131  | 8.93268  | 352 |

|           |          |          |          |     |
|-----------|----------|----------|----------|-----|
| Commd8    | 14.983   | 8.61457  | 9.94571  | 342 |
| Col4a1    | 2.08339  | 2.70219  | 1.94962  | 341 |
| Col26a1   | 0        | 1.08938  | 0.342623 | 323 |
| Col25a1   | 4.28404  | 1.46995  | 2.53122  | 357 |
| Col18a1   | 1.5143   | 0.708814 | 1.23065  | 347 |
| Cnst      | 2.23373  | 2.7378   | 1.02787  | 505 |
| Cnot6     | 3.92989  | 1.46995  | 4.77566  | 690 |
| Cnot4     | 49.2131  | 32.8282  | 33.0016  | 487 |
| Cnih4     | 14.0419  | 10.6076  | 14.0766  | 344 |
| Cmtm6     | 3.87641  | 1.41763  | 2.67834  | 342 |
| Cmpk1     | 29.0228  | 25.0747  | 14.8355  | 501 |
| Clvs1     | 25.7421  | 17.2064  | 13.1831  | 511 |
| Clptm1    | 9.4031   | 7.23954  | 6.63077  | 512 |
| Clpb      | 2.51088  | 0.380568 | 1.84597  | 513 |
| Clmp      | 1.97487  | 1.32017  | 1.30057  | 183 |
| Clk1      | 58.6106  | 53.6397  | 38.1879  | 325 |
| Clec1a    | 2.10535  | 0.708814 | 0.685246 | 359 |
| Clec16a   | 11.7256  | 9.74636  | 14.7733  | 346 |
| Cldn1     | 0.332194 | 0.708814 | 0        | 342 |
| Clcn3     | 45.0854  | 28.3771  | 31.0456  | 354 |
| Clcc1     | 6.30705  | 2.02899  | 4.92006  | 366 |
| Cklf      | 2.08339  | 1.46995  | 1.23065  | 656 |
| Ckap5     | 24.2991  | 12.8586  | 11.2159  | 182 |
| Cipc      | 11.4136  | 6.05827  | 8.06204  | 335 |
| Cidec     | 0        | 0        | 0.615324 | 509 |
| Cidea     | 3.0265   | 0.708814 | 0        | 179 |
| Ciao1     | 9.33625  | 5.75872  | 4.60717  | 344 |
| Chst2     | 3.61965  | 1.4004   | 2.87384  | 342 |
| Chst10    | 0.332194 | 1.08938  | 1.57327  | 187 |
| Chrna3    | 1.18211  | 0.708814 | 0        | 176 |
| Chpt1     | 2.67445  | 2.9399   | 2.25852  | 346 |
| Chn1      | 54.7944  | 73.4454  | 109.668  | 343 |
| Chmp3     | 20.2926  | 19.739   | 19.7208  | 511 |
| Chmp2b    | 19.808   | 18.4462  | 8.50342  | 174 |
| ChkbCpt1b | 5.13396  | 1.08938  | 0.615324 | 175 |
| Chek1     | 1.84649  | 0.708814 | 0.615324 | 335 |
| Chchd5    | 5.06062  | 3.59639  | 2.18859  | 355 |
| Cgn1      | 2.97146  | 0.761137 | 2.93983  | 330 |
| Cggbp1    | 9.66784  | 5.62538  | 7.48029  | 510 |
| Cftr      | 1.18211  | 0.708814 | 0.957947 | 492 |
| Cfd       | 0.591053 | 0.708814 | 0        | 341 |
| Cep72     | 1.6559   | 2.7378   | 0        | 180 |
| Cep70     | 14.9404  | 10.988   | 15.4512  | 329 |
| Cep350    | 0.664388 | 0.380568 | 1.94962  | 179 |
| Cep290    | 14.062   | 7.75182  | 15.0089  | 336 |
| Cep120    | 6.34914  | 1.08938  | 5.06243  | 503 |
| Cemip     | 7.20765  | 4.84214  | 3.5579   | 503 |

|          |          |          |          |     |
|----------|----------|----------|----------|-----|
| Celf3    | 7.95874  | 5.49585  | 4.61173  | 493 |
| Cebpzoz  | 4.70282  | 5.29713  | 3.50154  | 338 |
| Ceacam2  | 0        | 0        | 0.615324 | 352 |
| Cdon     | 0        | 0.708814 | 0        | 342 |
| Cdk2     | 0.332194 | 2.55933  | 0        | 334 |
| Cdk14    | 2.76974  | 1.85052  | 0.615324 | 341 |
| Cdh7     | 9.01037  | 4.50039  | 5.74768  | 183 |
| Cdc6     | 3.87851  | 0.708814 | 0.615324 | 324 |
| Cdc42se1 | 5.43549  | 3.49894  | 1.23065  | 487 |
| Cdc42ep4 | 1.97487  | 1.46995  | 0.957947 | 342 |
| Cdc23    | 9.22524  | 8.66543  | 4.68855  | 351 |
| Cdan1    | 0        | 1.08938  | 0.342623 | 346 |
| Cd86     | 1.47313  | 0.708814 | 0        | 340 |
| Cd53     | 3.37131  | 3.14628  | 1.7204   | 354 |
| Cd44     | 4.48576  | 2.83525  | 0.957947 | 339 |
| Cd36     | 3.61755  | 3.21582  | 1.02787  | 345 |
| Cd34     | 12.2594  | 6.16719  | 7.1813   | 183 |
| Cd276    | 0        | 0        | 0.615324 | 346 |
| Cd24a    | 9.05514  | 4.13821  | 0        | 350 |
| Cd247    | 0        | 0        | 0.615324 | 183 |
| Cd164    | 14.1706  | 2.88758  | 10.3083  | 509 |
| Ccr4     | 0        | 0        | 0.615324 | 349 |
| Ccng1    | 4.41242  | 2.7378   | 3.21646  | 333 |
| Ccnd1    | 3.1158   | 0.761137 | 0.615324 | 338 |
| Ccnc     | 18.8466  | 9.93058  | 12.2258  | 336 |
| Ccdc88a  | 12.4755  | 11.1812  | 8.36847  | 348 |
| Ccdc77   | 3.72607  | 3.44662  | 2.53122  | 345 |
| Ccdc38   | 0        | 0.708814 | 0        | 498 |
| Ccdc32   | 4.44761  | 3.1986   | 2.53122  | 336 |
| Ccdc177  | 2.10535  | 0.708814 | 0.615324 | 336 |
| Ccdc169  | 2.08339  | 3.26815  | 7.79643  | 353 |
| Ccdc157  | 0.923247 | 0.380568 | 2.43994  | 345 |
| Ccdc14   | 0.923247 | 0.380568 | 1.3343   | 347 |
| Ccdc120  | 0        | 0.708814 | 0.342623 | 507 |
| Cbln2    | 1.5143   | 0        | 0.957947 | 177 |
| Cbl1     | 1.84649  | 2.23109  | 1.57327  | 354 |
| Cblb     | 2.82479  | 2.88758  | 3.29367  | 495 |
| Casp8    | 3.0286   | 2.55933  | 2.80392  | 328 |
| Casd1    | 39.2485  | 26.2593  | 20.0087  | 370 |
| Casc4    | 19.4304  | 13.5621  | 18.5216  | 356 |
| Carm1    | 0.923247 | 0.380568 | 0.615324 | 647 |
| Carf     | 8.53743  | 7.04716  | 9.16299  | 352 |
| Car12    | 4.79213  | 2.73292  | 7.27441  | 353 |
| Caprin1  | 22.2165  | 10.1442  | 4.78973  | 333 |
| Capn5    | 1.77316  | 0        | 0.957947 | 353 |
| Cand1    | 4.41242  | 1.52227  | 3.46781  | 350 |
| Camk2n1  | 43.1062  | 33.0848  | 56.3144  | 343 |

|               |          |          |          |     |
|---------------|----------|----------|----------|-----|
| Calm3         | 0.332194 | 0.380568 | 1.4477   | 340 |
| Calm3         | 332.711  | 250.551  | 177.395  | 351 |
| Calm1         | 788.86   | 941.641  | 665.252  | 322 |
| Cald1         | 18.9891  | 10.4477  | 9.20118  | 335 |
| Calcr1        | 10.2031  | 7.97773  | 4.25161  | 337 |
| Calcr         | 0.591053 | 1.41763  | 0.957947 | 340 |
| Cadm1         | 40.0789  | 18.5592  | 17.7257  | 340 |
| Cacng5        | 2.10535  | 2.60827  | 1.30057  | 326 |
| Cacna2d1      | 4.61624  | 2.50701  | 5.96283  | 503 |
| C77080        | 2.30707  | 1.08938  | 0        | 339 |
| C330013F16Rik | 0        | 0.708814 | 0        | 329 |
| C230091D08Rik | 59.2966  | 40.1427  | 60.9449  | 342 |
| C1s2          | 0        | 0.380568 | 0.615324 | 182 |
| C1qtnf6       | 0        | 0.708814 | 0.615324 | 338 |
| C1ql3         | 5.52119  | 8.11517  | 8.58609  | 358 |
| C1qb          | 2.10535  | 1.08938  | 0        | 187 |
| C1d           | 39.3152  | 20.8197  | 19.1389  | 499 |
| C130074G19Rik | 2.26557  | 0.708814 | 0.957947 | 493 |
| C030039L03Rik | 9.37775  | 2.83525  | 3.83179  | 345 |
| Bzw1          | 67.3054  | 57.5737  | 31.3592  | 344 |
| Bzrap1        | 41.7053  | 22.7567  | 19.208   | 322 |
| Bub3          | 14.8261  | 6.86067  | 8.93665  | 333 |
| Btaf1         | 1.25544  | 1.01984  | 0.342623 | 347 |
| Brsk2         | 2.10535  | 2.88758  | 4.50296  | 337 |
| Brd3          | 9.09429  | 4.4123   | 1.57327  | 353 |
| Brcc3         | 55.7658  | 52.4995  | 45.8653  | 348 |
| Brat1         | 1.38382  | 2.40956  | 2.56495  | 353 |
| Brap          | 1.25544  | 1.32017  | 0.957947 | 500 |
| Bnip2         | 10.0541  | 6.25698  | 7.6438   | 334 |
| Bmpr1a        | 2.36421  | 0        | 1.84597  | 320 |
| Bmp1          | 1.5143   | 0.380568 | 2.18859  | 335 |
| Blzf1         | 51.0429  | 36.9476  | 24.646   | 345 |
| Bloc1s3       | 0        | 0        | 0.615324 | 178 |
| Bivm          | 5.72975  | 3.21582  | 4.90123  | 333 |
| Bin3          | 6.17749  | 8.46444  | 3.83595  | 337 |
| Bin1          | 12.103   | 10.626   | 10.5576  | 190 |
| Bet1          | 18.1057  | 19.2155  | 13.4414  | 347 |
| Bdnf          | 6.68134  | 3.87951  | 6.11052  | 176 |
| Bclaf1        | 42.9509  | 25.3452  | 23.547   | 336 |
| Bcl11a        | 11.2564  | 7.95392  | 3.83179  | 504 |
| BC035044      | 0.591053 | 0        | 2.80392  | 341 |
| BC027231      | 0.923247 | 1.08938  | 0.866667 | 179 |
| Bbip1         | 24.0758  | 9.60615  | 10.8232  | 355 |
| Bard1         | 0.591053 | 0.708814 | 0        | 346 |
| Bag5          | 9.1294   | 6.15817  | 9.58244  | 347 |
| Bag4          | 0.332194 | 0.380568 | 1.57327  | 185 |
| Bace1         | 0.923247 | 0        | 0.615324 | 323 |

|               |          |          |          |     |
|---------------|----------|----------|----------|-----|
| B3gat2        | 0.332194 | 0.708814 | 0.342623 | 335 |
| B3gat1        | 1.25544  | 0        | 0.615324 | 341 |
| B230217O12Rik | 13.9612  | 12.8148  | 12.0954  | 181 |
| B230216N24Rik | 8.07778  | 4.68577  | 3.05526  | 329 |
| Azin1         | 70.3788  | 43.489   | 23.9466  | 330 |
| AY512931      | 0        | 0.708814 | 0        | 342 |
| AW554918      | 7.64587  | 8.07267  | 5.44351  | 335 |
| AU023762      | 0.923247 | 0        | 1.91589  | 336 |
| AU019823      | 2.36421  | 3.21582  | 0.957947 | 330 |
| Atxn7l3b      | 42.472   | 32.5725  | 18.4313  | 347 |
| Atxn3         | 5.82933  | 5.68839  | 4.76719  | 338 |
| Atrx          | 28.4266  | 20.4597  | 19.5915  | 326 |
| Atp7a         | 3.3608   | 2.46188  | 1.84597  | 493 |
| Atp6v0d2      | 0        | 0.708814 | 0        | 343 |
| Atp6v0a2      | 4.5429   | 2.50701  | 5.24386  | 390 |
| Atp6ap1       | 18.4397  | 16.6618  | 11.8783  | 345 |
| Atp2b1        | 136.725  | 121.243  | 113.446  | 341 |
| Atp1a2        | 7.49717  | 8.06177  | 12.1366  | 186 |
| Atg14         | 5.02808  | 2.73292  | 7.4361   | 334 |
| Atf6          | 10.5926  | 3.90741  | 10.9509  | 494 |
| Asxl2         | 3.96236  | 2.48979  | 0        | 509 |
| Asic1         | 4.59427  | 1.46995  | 2.53122  | 662 |
| Asb3          | 6.88305  | 8.84501  | 7.5155   | 336 |
| Asap3         | 0.332194 | 0        | 0.957947 | 494 |
| Arxes2        | 17.5147  | 8.54806  | 3.46781  | 185 |
| Armc8         | 34.6229  | 14.8286  | 16.8583  | 502 |
| Arl6ip1       | 43.316   | 33.3012  | 30.925   | 499 |
| Arl6          | 23.8908  | 18.3168  | 15.0154  | 361 |
| Arl15         | 12.2345  | 6.00595  | 5.73304  | 526 |
| Arid3a        | 0.332194 | 0        | 0.685246 | 510 |
| Arhgef9       | 29.8842  | 25.0656  | 28.4023  | 357 |
| Arhgef6       | 1.5143   | 0        | 0.615324 | 181 |
| Arhgef33      | 19.9328  | 17.7271  | 12.69    | 336 |
| Arhgap6       | 6.50633  | 1.7982   | 5.3837   | 354 |
| Arhgap44      | 2.69641  | 0.380568 | 1.91589  | 494 |
| Arhgap39      | 0.332194 | 0        | 1.30057  | 175 |
| Arhgap32      | 8.46924  | 14.0195  | 25.6555  | 181 |
| Arhgap26      | 4.15356  | 2.12644  | 4.99251  | 338 |
| Arhgap15      | 0        | 1.32017  | 0        | 335 |
| Arfrp1        | 1.91983  | 1.08938  | 3.76186  | 199 |
| Arcn1         | 76.1825  | 52.7006  | 45.1659  | 341 |
| Arc           | 1.7512   | 2.7378   | 0.615324 | 334 |
| Arap1         | 4.7798   | 0.708814 | 3.90899  | 331 |
| Aqp9          | 0        | 0        | 0.615324 | 497 |
| Aqp4          | 81.2828  | 54.6544  | 30.5408  | 347 |
| Aplp2         | 176.589  | 189.169  | 165.703  | 357 |
| Api5          | 11.0165  | 7.8698   | 13.0577  | 332 |

|          |          |          |          |     |
|----------|----------|----------|----------|-----|
| Aph1b    | 1.84649  | 0        | 1.23065  | 504 |
| Ap2m1    | 56.8615  | 33.4883  | 31.8415  | 183 |
| Ap2a2    | 2.23373  | 1.46995  | 1.57327  | 177 |
| Ap1s3    | 0.923247 | 0        | 2.71264  | 357 |
| Ap1g1    | 4.44761  | 4.61623  | 2.16724  | 321 |
| Ap1b1    | 49.3081  | 28.0766  | 31.7774  | 338 |
| Anp32a   | 332.66   | 271.983  | 240.412  | 185 |
| Ano9     | 0        | 0        | 0.615324 | 350 |
| Ano4     | 7.33731  | 11.2187  | 12.4613  | 331 |
| Ano3     | 13.7195  | 17.5476  | 46.7923  | 344 |
| Anks1b   | 51.6112  | 50.1886  | 45.332   | 513 |
| Anks1    | 0        | 0        | 0.615324 | 495 |
| Ankrd55  | 2.43755  | 1.08938  | 1.23065  | 333 |
| Ankrd35  | 0.591053 | 0.380568 | 0.685246 | 334 |
| Ankrd26  | 5.24037  | 3.85509  | 4.16033  | 324 |
| Ankrd17  | 0.664388 | 1.46995  | 3.14654  | 347 |
| Ankrd16  | 0        | 0.708814 | 0.342623 | 187 |
| Ankra2   | 2.10535  | 2.23109  | 1.64319  | 330 |
| Ankib1   | 8.52783  | 11.236   | 16.7105  | 341 |
| Ank3     | 143.897  | 62.7702  | 57.1567  | 337 |
| Ank2     | 112.843  | 74.0183  | 66.3834  | 502 |
| Angel1   | 0        | 0.708814 | 1.23065  | 176 |
| Amot     | 4.93014  | 1.08938  | 2.87384  | 326 |
| Ammecr1  | 1.25544  | 0.708814 | 0.685246 | 558 |
| Amd2     | 12.0488  | 10.1841  | 16.2445  | 342 |
| Amacr    | 3.45873  | 1.7982   | 1.79032  | 177 |
| Aldh6a1  | 9.93814  | 7.95885  | 9.88363  | 348 |
| Aldh3a2  | 4.61624  | 4.63345  | 4.78973  | 353 |
| Alcam    | 6.0572   | 2.87035  | 3.21646  | 488 |
| Akt3     | 54.519   | 38.4746  | 55.1619  | 345 |
| Akap17b  | 1.84649  | 0.380568 | 0.957947 | 495 |
| Akap12   | 13.0414  | 2.81803  | 7.11138  | 179 |
| Ak3      | 4.18875  | 5.44     | 4.01321  | 510 |
| Aif1l    | 1.5143   | 0        | 1.84597  | 506 |
| AI597479 | 27.6033  | 12.7128  | 13.5324  | 341 |
| AI506816 | 0.332194 | 0.380568 | 0.957947 | 338 |
| Ahsa2    | 4.02518  | 3.27059  | 1.23065  | 323 |
| Ahctf1   | 0        | 0        | 1.4477   | 346 |
| Agtppb1  | 43.1832  | 24.28    | 15.8288  | 179 |
| Agpat5   | 3.69299  | 1.08938  | 1.91589  | 339 |
| Aftph    | 3.28746  | 0.761137 | 2.18859  | 340 |
| AF529169 | 1.5143   | 1.41763  | 0.615324 | 189 |
| Aen      | 3.3608   | 1.46995  | 3.63629  | 323 |
| Adrbk2   | 7.7083   | 5.37736  | 7.7267   | 526 |
| Adra1a   | 1.77316  | 3.82718  | 3.97891  | 343 |
| Adipor2  | 0.923247 | 1.46995  | 4.25161  | 331 |
| Add1     | 22.2211  | 14.1637  | 17.0224  | 345 |



|                |          |          |          |     |
|----------------|----------|----------|----------|-----|
| Adcyap1r1      | 3.69299  | 1.08938  | 4.35583  | 337 |
| Adcy6          | 7.29435  | 6.28187  | 2.18859  | 355 |
| Adcy2          | 1.58764  | 1.08938  | 0.615324 | 178 |
| Adck4          | 5.4566   | 3.21998  | 3.79635  | 182 |
| Adarb2         | 15.229   | 12.4603  | 15.8711  | 535 |
| Adarb1         | 0.591053 | 0.380568 | 1.57327  | 503 |
| Adar           | 12.1357  | 5.77516  | 8.8847   | 500 |
| Adamts11       | 0.923247 | 0.708814 | 1.94962  | 344 |
| Adamts6        | 14.8352  | 3.59639  | 3.39788  | 348 |
| Adamts3        | 6.4766   | 3.26815  | 2.67106  | 344 |
| Adamts1        | 1.5143   | 2.18121  | 0.342623 | 184 |
| Adam23         | 1.84649  | 0.380568 | 0.685246 | 326 |
| Adam17         | 16.7357  | 11.4043  | 8.47309  | 180 |
| Actr2          | 125.416  | 98.8075  | 98.9516  | 183 |
| Actr10         | 6.49531  | 8.69336  | 3.76551  | 348 |
| Acsl4          | 26.2131  | 18.1311  | 15.1069  | 337 |
| Acp2           | 27.5121  | 16.3598  | 21.4914  | 349 |
| Aco1           | 14.3906  | 8.86005  | 6.10632  | 324 |
| Acer3          | 10.332   | 3.85509  | 3.36359  | 488 |
| Acat1          | 90.5987  | 58.8684  | 33.2916  | 491 |
| Acap3          | 2.34225  | 3.59639  | 2.18859  | 516 |
| Acadsb         | 14.2796  | 13.5361  | 13.799   | 341 |
| Acad8          | 8.41332  | 1.08938  | 3.21646  | 186 |
| Abr            | 5.70305  | 6.81221  | 9.78224  | 344 |
| Ablim3         | 2.51088  | 2.87035  | 1.57327  | 325 |
| Abhd10         | 9.68199  | 8.14335  | 3.74051  | 511 |
| Abcg1          | 1.5143   | 0.380568 | 1.57327  | 335 |
| Abce1          | 36.469   | 28.8508  | 15.9737  | 184 |
| Abcd3          | 13.6959  | 7.0074   | 5.27948  | 335 |
| Abcd2          | 13.2071  | 13.0944  | 12.036   | 342 |
| Abcb7          | 12.3282  | 10.3941  | 11.748   | 508 |
| Abat           | 65.4173  | 64.311   | 55.273   | 349 |
| Aar2           | 4.14757  | 4.11982  | 2.09731  | 348 |
| AA543186       | 0.827951 | 0        | 2.09731  | 181 |
| A930004D18Rik  | 0.591053 | 0.708814 | 0        | 331 |
| A730020M07Rik  | 0.591053 | 0        | 0.615324 | 330 |
| A630075F10Rik  | 0        | 0.708814 | 0        | 337 |
| A430033K04Rik  | 9.60775  | 5.87289  | 7.23787  | 533 |
| A330033J07Rik  | 0        | 0        | 0.615324 | 331 |
| 9930111J21Rik1 | 2.84308  | 3.57917  | 0.866667 | 336 |
| 9930012K11Rik  | 0.664388 | 0        | 0.685246 | 339 |
| 9630033F20Rik  | 10.9954  | 10.6071  | 8.00489  | 342 |
| 9630028H03Rik  | 0.591053 | 0.708814 | 0        | 489 |
| 9530080O11Rik  | 1.77316  | 1.7982   | 2.33572  | 338 |
| 9530068E07Rik  | 10.0485  | 1.7982   | 4.48615  | 336 |
| 9430083A17Rik  | 2.08339  | 0.708814 | 0.957947 | 184 |
| 9330159F19Rik  | 15.7996  | 10.5419  | 15.6799  | 528 |

|                |          |          |          |     |
|----------------|----------|----------|----------|-----|
| 9230112J17Rik  | 0        | 0.380568 | 1.4477   | 322 |
| 8430431K14Rik  | 4.13737  | 3.54407  | 2.53122  | 335 |
| 6820431F20Rik  | 72.2277  | 55.7689  | 55.5976  | 328 |
| 6530402F18Rik  | 0.591053 | 0.708814 | 0.342623 | 342 |
| 6430548M08Rik  | 4.7798   | 3.11837  | 5.08399  | 511 |
| 6330549D23Rik  | 0        | 0        | 2.09731  | 335 |
| 5930430L01Rik  | 2.21177  | 1.72865  | 4.5131   | 333 |
| 5730457N03Rik  | 0        | 0        | 0.615324 | 491 |
| 5730455P16Rik  | 14.6846  | 9.15467  | 7.22911  | 340 |
| 5430403N17Rik  | 0        | 0.708814 | 0        | 181 |
| 5330426P16Rik  | 9.42344  | 3.82718  | 7.85313  | 510 |
| 4933421O10Rik  | 0.591053 | 0        | 0.615324 | 337 |
| 4933411G06Rik  | 0        | 0        | 1.23065  | 182 |
| 4932438H23Rik  | 1.77316  | 0.708814 | 0        | 361 |
| 4932411E22Rik  | 2.36421  | 0.708814 | 0        | 173 |
| 4931429L15Rik  | 0        | 0.708814 | 0        | 187 |
| 4931414P19Rik  | 5.20771  | 5.0006   | 3.56637  | 513 |
| 4930539E08Rik  | 0.591053 | 1.46995  | 0        | 368 |
| 4930519F09Rik  | 4.67128  | 3.87951  | 1.89909  | 332 |
| 4930515G01Rik  | 1.5143   | 1.41763  | 0.866667 | 181 |
| 4930511M06Rik  | 0        | 0        | 0.615324 | 500 |
| 4930447N08Rik  | 0.591053 | 0        | 1.57327  | 179 |
| 4930442L01Rik  | 0        | 0        | 0.615324 | 335 |
| 4930425O10Rik  | 0        | 0        | 0.615324 | 497 |
| 4632428N05Rik  | 0        | 2.23109  | 1.20929  | 510 |
| 3830406C13Rik  | 8.02998  | 9.08871  | 6.45258  | 342 |
| 3110062M04Rik  | 0.591053 | 1.41763  | 0.615324 | 342 |
| 3110035E14Rik  | 54.7963  | 38.6953  | 62.1142  | 338 |
| 3000002C10Rik  | 0.332194 | 0.380568 | 1.30057  | 331 |
| 2900008C10Rik  | 1.38382  | 0        | 2.18859  | 179 |
| 2810021J22Rik  | 1.18211  | 1.46995  | 2.17179  | 502 |
| 2610301B20Rik  | 3.46721  | 3.83787  | 3.50154  | 495 |
| 2610044O15Rik8 | 36.2398  | 33.1254  | 20.476   | 335 |
| 2610008E11Rik  | 14.6296  | 5.39459  | 3.57931  | 542 |
| 2310061N02Rik  | 0        | 0.708814 | 0        | 340 |
| 2310001H17Rik  | 0.591053 | 1.32017  | 1.84597  | 181 |
| 2210408I21Rik  | 13.0922  | 8.89353  | 10.2413  | 350 |
| 2010012O05Rik  | 8.77533  | 4.5321   | 5.9895   | 337 |
| 1810064F22Rik  | 0        | 0        | 0.615324 | 193 |
| 1700003D09Rik  | 0.591053 | 0        | 0.957947 | 335 |
| 1500011B03Rik  | 9.86178  | 4.40647  | 5.19982  | 337 |
| 1110051M20Rik  | 27.6745  | 13.8965  | 16.7849  | 184 |
| 1110038B12Rik  | 31.336   | 10.3412  | 9.08378  | 181 |
| 1110037F02Rik  | 3.60821  | 2.88758  | 0        | 508 |
| 0610040F04Rik  | 1.5143   | 1.41763  | 1.23065  | 344 |

Supplementary Table S2: mRNA targets predicted using miRanda. The Gene names in addition to their

normalized CAGE expression throughout postnatal development in brain and the average miRanda score for each predicted gene target.
