# Supplementary material for: Characterization of piRNAs across postnatal development in mouse brain
Source: PubMed Central journal article supplement (PMC4844963; doi:10.1038/srep25039), 2016-04-26
Supplement: srep25039-s3.pdf [file srep25039-s3.pdf]

| Gene Name     | 10 dpp   | 14 dpp   | Adult    |
|---------------|----------|----------|----------|
| 5830416I19Rik | 0        | 0        | 0        |
| Ahdc1         | 12.4984  | 2.7378   | 3.90899  |
| Arcn1         | 76.1825  | 52.7006  | 45.1659  |
| B4galt6       | 0        | 0        | 0        |
| B630005N14Rik | 1.25544  | 1.08938  | 0.342623 |
| Bc1           | 0        | 0        | 0.342623 |
| Camk4         | 26.2621  | 14.5017  | 10.3891  |
| Cep128        | 3.28746  | 0.380568 | 0        |
| Cep97         | 3.57303  | 2.98884  | 4.77509  |
| Comt          | 1.84649  | 1.41763  | 2.18859  |
| Dnal1         | 22.1745  | 17.2689  | 18.5021  |
| Glb1          | 1.71601  | 2.17876  | 0.342623 |
| Gm8234        | 0        | 0.380568 | 0.685246 |
| Gna11         | 3.17527  | 1.46995  | 0.342623 |
| Igf2bp2       | 0        | 0        | 0        |
| Ikamp         | 8.88074  | 6.30578  | 10.1821  |
| Kcnq1         | 0        | 0.380568 | 0        |
| Kcnq1ot1      | 1.64268  | 0.761137 | 1.91589  |
| Klhdc3        | 5.03656  | 4.02928  | 2.53122  |
| Lars2         | 3.96236  | 2.17876  | 2.50986  |
| Lmbrd1        | 8.98538  | 11.8051  | 13.0189  |
| Mc1r          | 0        | 0        | 0        |
| Mrpl19        | 7.46477  | 6.81847  | 5.10924  |
| Nav1          | 11.6106  | 3.59639  | 1.23065  |
| Nfia          | 33.7869  | 10.5856  | 6.99141  |
| Nras          | 50.6035  | 38.924   | 46.8129  |
| Ogfrl1        | 0.923247 | 0.761137 | 0        |
| Pax6          | 12.5332  | 2.17876  | 0.342623 |
| Plxna4        | 0.332194 | 0        | 0        |
| Rapgef4       | 16.023   | 14.5468  | 23.6392  |
| Rbm46os       | 0        | 0        | 0        |
| Rn45s         | 216.059  | 131.681  | 148.229  |
| Rn4.5s        | 352.341  | 198.255  | 213.714  |
| Slx1b         | 0        | 1.08938  | 2.59721  |
| Snrk          | 8.81341  | 7.91307  | 7.36272  |
| Syt11         | 168.625  | 160.355  | 131.069  |
| Thap2         | 2.43755  | 1.4004   | 0        |
| Tmppe         | 1.71601  | 2.17876  | 0.342623 |
| Trip4         | 16.7145  | 6.74267  | 10.1467  |
| Trmt10a       | 21.5578  | 9.80688  | 17.1325  |
| Zxda          | 0.664388 | 0.380568 | 0.342623 |

Supplementary Table S3: Predicted mRNA targets based on piRNA cleavage signature and their normalized CAGE expression throughout postnatal development in brain
