# Supplementary material for: Characterization of piRNAs across postnatal development in mouse brain
Source: PubMed Central journal article supplement (PMC4844963; doi:10.1038/srep25039), 2016-04-26
Supplement: srep25039-s4.pdf [file srep25039-s4.pdf]

| Repeat Class   | Repeat Family  | Repeat Subfamily | Chromosome | Start    | End      | Strand | 10 dpp   | 14 dpp   | Adult    |
|----------------|----------------|------------------|------------|----------|----------|--------|----------|----------|----------|
| SINE           | Alu            | B1_Mus2          | chr14      | 44062955 | 44063100 | -      | 0        | 0        | 0        |
| Simple_repeat  | Simple_repeat  | (A)n             | chr14      | 44293009 | 44293043 | +      | 0.923247 | 0.380568 | 1.84597  |
| Simple_repeat  | Simple_repeat  | (A)n             | chr14      | 44433069 | 44433104 | +      | 0        | 0        | 0        |
| SINE           | Alu            | B1_Mus2          | chr14      | 44844922 | 44845065 | +      | 0.591053 | 0        | 0        |
| LTR            | MaLR           | MTA_Mm-int       | chr14      | 44845066 | 44845846 | +      | 0.591053 | 0        | 0        |
| SINE           | B2             | B2_Mm1a          | chr14      | 45456446 | 45456640 | +      | 0        | 0        | 0        |
| Simple_repeat  | Simple_repeat  | (A)n             | chr14      | 45456641 | 45456684 | +      | 0        | 0        | 0        |
| LINE           | L1             | L1Md_T           | chr14      | 45633332 | 45639965 | -      | 0        | 0.708814 | 0        |
| SINE           | B2             | B2_Mm1a          | chr14      | 46189145 | 46189333 | -      | 0.332194 | 0        | 0        |
| SINE           | Alu            | B1_Mus2          | chr14      | 46201983 | 46202128 | -      | 0.591053 | 0        | 0        |
| SINE           | Alu            | B1_Mm            | chr10      | 8402574  | 8402721  | +      | 0        | 0        | 0        |
| Simple_repeat  | Simple_repeat  | (A)n             | chr10      | 8402722  | 8402744  | +      | 0.591053 | 0        | 0        |
| SINE           | Alu            | B1_Mus2          | chr14      | 47218365 | 47218512 | -      | 0        | 0        | 0        |
| LTR            | MaLR           | MTA_Mm           | chr14      | 48243261 | 48243656 | -      | 0        | 0        | 0        |
| SINE           | B4             | B4               | chr14      | 48631557 | 48631847 | +      | 0        | 0        | 0        |
| LTR            | MaLR           | MTA_Mm           | chr14      | 49155242 | 49155635 | +      | 0        | 0        | 0        |
| SINE           | Alu            | B1_Mus2          | chr14      | 49180083 | 49180220 | +      | 0        | 0        | 0        |
| Simple_repeat  | Simple_repeat  | (TTTA)n          | chr14      | 49418185 | 49418224 | +      | 0        | 0        | 0        |
| SINE           | B2             | B2_Mm1t          | chr14      | 50604083 | 50604274 | +      | 0        | 0        | 0.342623 |
| Simple_repeat  | Simple_repeat  | (A)n             | chr14      | 51264803 | 51264846 | +      | 0        | 0        | 0        |
| SINE           | Alu            | B1_Mus2          | chr10      | 59688638 | 59688784 | -      | 0        | 0        | 0        |
| SINE           | Alu            | B1_Mm            | chr14      | 51625472 | 51625614 | +      | 0        | 0        | 0        |
| Simple_repeat  | Simple_repeat  | (A)n             | chr14      | 51625615 | 51625647 | +      | 0        | 0        | 0        |
| LINE           | L1             | L1_Mus3          | chr14      | 52087084 | 52093584 | +      | 0        | 0        | 0        |
| Simple_repeat  | Simple_repeat  | (A)n             | chr14      | 52116735 | 52116775 | +      | 0        | 0        | 0        |
| Simple_repeat  | Simple_repeat  | (A)n             | chr14      | 52118910 | 52118936 | +      | 0        | 0        | 0        |
| SINE           | Alu            | B1_Mus2          | chr14      | 52592394 | 52592539 | -      | 0        | 0        | 0        |
| SINE           | Alu            | B1_Mus1          | chr14      | 52691766 | 52691911 | +      | 0.332194 | 0        | 0        |
| Simple_repeat  | Simple_repeat  | (A)n             | chr14      | 52691912 | 52691954 | +      | 0        | 0        | 0        |
| SINE           | Alu            | B1_Mus2          | chr14      | 52859736 | 52859882 | -      | 0        | 0.708814 | 0.342623 |
| SINE           | Alu            | B1_Mus1          | chr14      | 52874067 | 52874211 | +      | 0        | 0        | 0.342623 |
| LTR            | MaLR           | MTA_Mm           | chr14      | 53044740 | 53045135 | +      | 0        | 0        | 0        |
| LTR            | MaLR           | MTA_Mm           | chr14      | 53631391 | 53631786 | +      | 0        | 0        | 0        |
| SINE           | Alu            | B1_Mus2          | chr14      | 53727913 | 53728061 | +      | 0        | 0        | 0        |
| Simple_repeat  | Simple_repeat  | (A)n             | chr14      | 53728062 | 53728087 | +      | 0        | 0        | 0        |
| LTR            | MaLR           | MTA_Mm           | chr14      | 53942513 | 53942908 | +      | 0        | 0        | 0        |
| LTR            | MaLR           | MTA_Mm           | chr14      | 54331202 | 54331598 | +      | 0        | 0        | 0        |
| Simple_repeat  | Simple_repeat  | (A)n             | chr14      | 54776580 | 54776616 | +      | 0        | 0        | 0        |
| SINE           | Alu            | B1_Mus1          | chr14      | 54889908 | 54890055 | -      | 0.332194 | 0.761137 | 0.957947 |
| LTR            | MaLR           | MTA_Mm           | chr14      | 54956750 | 54957144 | -      | 0        | 0        | 0        |
| Low_complexity | Low_complexity | A-rich           | chr14      | 55112093 | 55112150 | +      | 0        | 0        | 0        |
| LTR            | MaLR           | MTB              | chr14      | 55178677 | 55179074 | -      | 0        | 0        | 0        |
| SINE           | Alu            | B1_Mm            | chr14      | 55225561 | 55225707 | +      | 0        | 0        | 0        |
| Simple_repeat  | Simple_repeat  | (A)n             | chr14      | 55225708 | 55225728 | +      | 0        | 0        | 0        |
| Simple_repeat  | Simple_repeat  | (A)n             | chr14      | 55404825 | 55404852 | +      | 0        | 0        | 0        |
| SINE           | Alu            | B1_Mm            | chr14      | 56008850 | 56008978 | -      | 0        | 0        | 0        |
| Simple_repeat  | Simple_repeat  | (A)n             | chr14      | 56109445 | 56109491 | +      | 0        | 0        | 0.615324 |
| SINE           | Alu            | B1_Mm            | chr14      | 57021154 | 57021288 | +      | 0        | 0        | 0        |
| Simple_repeat  | Simple_repeat  | (A)n             | chr14      | 57021289 | 57021314 | +      | 0        | 0        | 0        |
| LTR            | ERVK           | RMER4A           | chr14      | 57280971 | 57281404 | -      | 0        | 0.380568 | 0        |
| SINE           | Alu            | B1_Mus1          | chr14      | 57281405 | 57281552 | -      | 0        | 0.380568 | 0        |
| Simple_repeat  | Simple_repeat  | (A)n             | chr14      | 57450005 | 57450042 | +      | 0        | 0        | 0        |
| Simple_repeat  | Simple_repeat  | (A)n             | chr14      | 58528342 | 58528371 | +      | 0        | 0        | 0        |
| Simple_repeat  | Simple_repeat  | (A)n             | chr14      | 59671374 | 59671403 | +      | 0        | 0        | 0        |
| Simple_repeat  | Simple_repeat  | (A)n             | chr14      | 59676380 | 59676407 | +      | 0        | 0        | 0        |
| Simple_repeat  | Simple_repeat  | (A)n             | chr14      | 59890064 | 59890100 | +      | 0        | 0        | 0.957947 |
| SINE           | Alu            | B1_Mm            | chr14      | 60922559 | 60922700 | -      | 0        | 0        | 0        |
| Simple_repeat  | Simple_repeat  | (A)n             | chr14      | 60976143 | 60976188 | +      | 0        | 0        | 0        |
| SINE           | Alu            | B1_Mus2          | chr10      | 60619009 | 60619155 | +      | 0        | 0        | 0        |
| Low_complexity | Low_complexity | A-rich           | chr10      | 60619156 | 60619212 | +      | 0        | 0        | 0.615324 |
| SINE           | B2             | B2_Mm1a          | chr14      | 61742582 | 61742774 | -      | 0        | 0        | 0        |
| SINE           | B4             | B4A              | chr14      | 62120452 | 62120754 | -      | 0        | 0        | 0        |
| SINE           | Alu            | B1_Mus1          | chr14      | 62542202 | 62542348 | -      | 0        | 0        | 0        |
| SINE           | Alu            | B1_Mus1          | chr14      | 62818141 | 62818292 | -      | 0        | 0        | 0        |
| LTR            | MaLR           | MTA_Mm           | chr14      | 62890901 | 62891296 | -      | 0        | 0        | 0        |
| SINE           | Alu            | B1_Mm            | chr14      | 63248178 | 63248313 | +      | 0        | 0.380568 | 0        |

|                |                |         |       |                     |          |          |          |
|----------------|----------------|---------|-------|---------------------|----------|----------|----------|
| Simple_repeat  | Simple_repeat  | (GAAA)n | chr14 | 63248314 63248402 + | 0.332194 | 0.380568 | 0        |
| SINE           | Alu            | B1_Mm   | chr14 | 64211192 64211337 + | 0        | 0        | 0        |
| Simple_repeat  | Simple_repeat  | (A)n    | chr14 | 64211338 64211377 + | 0        | 0        | 0        |
| SINE           | Alu            | B1_Mus2 | chr14 | 65264333 65264466 + | 0        | 0        | 0        |
| Simple_repeat  | Simple_repeat  | (A)n    | chr14 | 65264467 65264487 + | 0        | 0        | 0        |
| SINE           | B2             | B2_Mm1t | chr14 | 65722060 65722255 + | 0        | 0        | 0        |
| SINE           | B2             | B2_Mm1a | chr14 | 65725949 65726134 - | 0        | 0        | 0.342623 |
| SINE           | Alu            | B1_Mm   | chr14 | 65735920 65736065 + | 0        | 0        | 0        |
| Simple_repeat  | Simple_repeat  | (A)n    | chr14 | 65736066 65736087 + | 0        | 0        | 0        |
| LTR            | MaLR           | MTA_Mm  | chr14 | 65807962 65808357 + | 0        | 0        | 0        |
| SINE           | Alu            | B1_Mus1 | chr14 | 66398026 66398172 - | 0        | 0        | 0        |
| SINE           | Alu            | B1_Mus2 | chr14 | 66415713 66415857 - | 0        | 0        | 0        |
| Simple_repeat  | Simple_repeat  | (A)n    | chr14 | 66643777 66643801 + | 0.332194 | 0        | 0        |
| LTR            | ERVK           | RLTR45  | chr14 | 66643802 66644272 + | 0.332194 | 0        | 0        |
| LTR            | MaLR           | MTA_Mm  | chr14 | 68083178 68083562 - | 0        | 0        | 0        |
| SINE           | Alu            | B1_Mus2 | chr14 | 68216752 68216898 - | 0        | 0        | 0        |
| SINE           | Alu            | B1_Mus1 | chr14 | 68565890 68566037 - | 0        | 0        | 0        |
| SINE           | Alu            | B1_Mm   | chr14 | 68648354 68648499 + | 0        | 0        | 0.342623 |
| Low_complexity | Low_complexity | A-rich  | chr14 | 68648500 68648542 + | 0        | 0        | 0        |
| SINE           | Alu            | B1_Mm   | chr14 | 68678129 68678273 - | 0        | 0        | 0        |
| Simple_repeat  | Simple_repeat  | (A)n    | chr14 | 69152100 69152134 + | 0        | 0        | 0        |
| Simple_repeat  | Simple_repeat  | (A)n    | chr14 | 69377617 69377647 + | 0        | 0        | 0        |
| SINE           | Alu            | B1_Mm   | chr14 | 69990500 69990641 + | 1.18211  | 0        | 0.957947 |
| Simple_repeat  | Simple_repeat  | (A)n    | chr14 | 69990642 69990670 + | 0        | 0        | 0.957947 |
| SINE           | Alu            | B1_Mur4 | chr14 | 70766020 70766197 - | 0        | 0        | 0        |
| Simple_repeat  | Simple_repeat  | (A)n    | chr14 | 71914209 71914247 + | 0        | 0        | 0        |
| LINE           | L1             | L1Md_T  | chr14 | 72184355 72191900 - | 0        | 0        | 0        |
| SINE           | Alu            | B1_Mur4 | chr14 | 72333049 72333196 + | 0        | 0        | 0        |
| Simple_repeat  | Simple_repeat  | (A)n    | chr14 | 72333197 72333220 + | 0.332194 | 0        | 0        |
| SINE           | Alu            | B1_Mm   | chr14 | 72459596 72459741 - | 0        | 0        | 0        |
| Simple_repeat  | Simple_repeat  | (A)n    | chr14 | 72549353 72549394 + | 0        | 0        | 0        |
| Simple_repeat  | Simple_repeat  | (A)n    | chr14 | 72582849 72582901 + | 0        | 0        | 0        |
| LTR            | MaLR           | MTA_Mm  | chr14 | 72774262 72774658 - | 0        | 0        | 0        |
| SINE           | B2             | B2_Mm1t | chr14 | 72844259 72844446 - | 0        | 0        | 0        |
| LTR            | MaLR           | MTA_Mm  | chr14 | 73291278 73291672 - | 0        | 0        | 0        |
| SINE           | Alu            | B1_Mm   | chr14 | 73405670 73405815 - | 0        | 0        | 0        |
| LTR            | MaLR           | MTA_Mm  | chr14 | 74240571 74240965 + | 0        | 0        | 0        |
| Simple_repeat  | Simple_repeat  | (A)n    | chr14 | 74658741 74658775 + | 0        | 0        | 0        |
| Simple_repeat  | Simple_repeat  | (A)n    | chr14 | 75351422 75351462 + | 0        | 0        | 0        |
| SINE           | Alu            | B1_Mur4 | chr14 | 75365503 75365650 - | 0        | 0        | 0        |
| SINE           | Alu            | B1_Mm   | chr14 | 76238363 76238510 + | 0        | 0        | 0        |
| Low_complexity | Low_complexity | A-rich  | chr14 | 76238511 76238557 + | 0        | 0        | 0        |
| DNA            | MER1_type      | RCHARR1 | chr14 | 76423579 76424390 - | 0        | 0        | 0        |
| SINE           | Alu            | B1_Mm   | chr14 | 76584030 76584176 + | 0        | 0        | 0        |
| Simple_repeat  | Simple_repeat  | (A)n    | chr14 | 76584177 76584212 + | 0.332194 | 0        | 0        |
| SINE           | Alu            | B1_Mus2 | chr14 | 76630104 76630249 + | 0        | 0        | 0        |
| Simple_repeat  | Simple_repeat  | (GAAA)n | chr14 | 76630250 76630297 + | 0        | 0        | 0        |
| Simple_repeat  | Simple_repeat  | (A)n    | chr14 | 77093604 77093633 + | 0        | 0        | 0        |
| SINE           | Alu            | B1_Mus2 | chr14 | 77339477 77339614 + | 0.591053 | 0        | 0        |
| SINE           | Alu            | B1_Mus2 | chr14 | 78415097 78415241 + | 0        | 0        | 0        |
| Simple_repeat  | Simple_repeat  | (A)n    | chr14 | 78415242 78415295 + | 0        | 0        | 0        |
| SINE           | Alu            | B1_Mm   | chr14 | 78789667 78789813 + | 0        | 0        | 0        |
| Simple_repeat  | Simple_repeat  | (A)n    | chr14 | 78789814 78789839 + | 0        | 0        | 0        |
| Simple_repeat  | Simple_repeat  | (A)n    | chr14 | 79713665 79713693 + | 0        | 0        | 0        |
| SINE           | Alu            | B1_Mus2 | chr10 | 61979292 61979436 - | 0.591053 | 0        | 0        |
| LINE           | L1             | L1Md_T  | chr14 | 80228611 80236116 - | 0        | 0        | 0        |
| Simple_repeat  | Simple_repeat  | (A)n    | chr14 | 80659908 80659979 + | 0        | 0        | 0        |
| scRNA          | scRNA          | BC1_Mm  | chr14 | 80984419 80984567 - | 0        | 0        | 0        |
| Simple_repeat  | Simple_repeat  | (A)n    | chr14 | 81701811 81701858 + | 0        | 0        | 0        |
| SINE           | Alu            | B1_Mm   | chr10 | 62068311 62068455 - | 0        | 0        | 0        |
| SINE           | Alu            | B1_Mm   | chr14 | 81927179 81927325 - | 0        | 0        | 0        |
| LINE           | L1             | L1Md_T  | chr14 | 82190724 82197632 - | 0.591053 | 0        | 0        |
| SINE           | Alu            | B1_Mm   | chr14 | 82886887 82887033 + | 0        | 0        | 0        |
| Simple_repeat  | Simple_repeat  | (A)n    | chr14 | 82887034 82887059 + | 0        | 0        | 0        |
| Simple_repeat  | Simple_repeat  | (A)n    | chr14 | 83388941 83388995 + | 0        | 0        | 0        |
| SINE           | Alu            | B1_Mus1 | chr14 | 83421236 83421368 - | 0        | 0        | 0        |
| SINE           | Alu            | B1_Mm   | chr14 | 83573066 83573211 + | 0        | 0.708814 | 0        |

|                |                |         |       |                     |          |          |          |
|----------------|----------------|---------|-------|---------------------|----------|----------|----------|
| Simple_repeat  | Simple_repeat  | (A)n    | chr14 | 83573212 83573242 + | 0        | 0.708814 | 0        |
| LINE           | L1             | L1_Mus1 | chr14 | 84333070 84339502 - | 0        | 0        | 0        |
| Simple_repeat  | Simple_repeat  | (A)n    | chr14 | 84546868 84546927 + | 0.591053 | 0        | 0        |
| LINE           | L1             | L1Md_F2 | chr14 | 84709831 84715027 + | 0        | 0        | 0        |
| Simple_repeat  | Simple_repeat  | (A)n    | chr14 | 84834692 84834741 + | 0        | 0        | 0.342623 |
| SINE           | Alu            | B1_Mus2 | chr14 | 85312470 85312616 - | 0        | 0        | 0        |
| Simple_repeat  | Simple_repeat  | (A)n    | chr14 | 85469753 85469789 + | 0        | 0        | 0        |
| Simple_repeat  | Simple_repeat  | (A)n    | chr14 | 85495351 85495387 + | 0        | 0        | 0        |
| Simple_repeat  | Simple_repeat  | (A)n    | chr14 | 85679649 85679674 + | 0        | 0        | 0        |
| SINE           | Alu            | B1_Mm   | chr14 | 85909745 85909886 + | 0        | 0        | 0        |
| Simple_repeat  | Simple_repeat  | (A)n    | chr14 | 85909887 85909920 + | 0        | 0        | 0        |
| Simple_repeat  | Simple_repeat  | (A)n    | chr14 | 86545624 86545652 + | 0        | 0        | 0        |
| Low_complexity | Low_complexity | GA-rich | chr14 | 86545653 86545829 + | 0        | 0        | 0        |
| LTR            | MaLR           | MTB     | chr14 | 87647964 87648361 + | 0        | 0        | 0        |
| LTR            | MaLR           | MTA_Mm  | chr14 | 87718375 87718769 + | 0        | 0        | 0        |
| SINE           | Alu            | B1_Mm   | chr10 | 62374352 62374490 - | 0        | 0        | 0        |
| LTR            | MaLR           | ORR1B1  | chr14 | 88398406 88398728 - | 0        | 0        | 0        |
| SINE           | Alu            | B1_Mm   | chr14 | 88622483 88622628 - | 0        | 0        | 0        |
| Simple_repeat  | Simple_repeat  | (A)n    | chr14 | 89520173 89520204 + | 0        | 0        | 0        |
| Simple_repeat  | Simple_repeat  | (A)n    | chr14 | 89980350 89980389 + | 0        | 0        | 0        |
| SINE           | Alu            | B1_Mus1 | chr14 | 90834208 90834354 + | 0        | 0        | 0        |
| Simple_repeat  | Simple_repeat  | (A)n    | chr14 | 90834355 90834400 + | 0        | 0        | 0        |
| Simple_repeat  | Simple_repeat  | (A)n    | chr14 | 91204171 91204196 + | 0        | 0        | 0        |
| LTR            | MaLR           | MTA_Mm  | chr14 | 91688330 91688727 + | 0        | 0        | 0        |
| SINE           | Alu            | B1_Mus1 | chr14 | 92378666 92378813 + | 0        | 0        | 0        |
| Simple_repeat  | Simple_repeat  | (GAAA)n | chr14 | 92378815 92378886 + | 0        | 0        | 0        |
| Simple_repeat  | Simple_repeat  | (A)n    | chr14 | 92405030 92405070 + | 0        | 0        | 0        |
| LTR            | ERVK           | RMER6C  | chr14 | 92546049 92546656 + | 0        | 0        | 0        |
| SINE           | Alu            | B1_Mm   | chr14 | 92782547 92782692 + | 0        | 0        | 0        |
| Simple_repeat  | Simple_repeat  | (A)n    | chr14 | 92782693 92782715 + | 0        | 0        | 0        |
| Simple_repeat  | Simple_repeat  | (A)n    | chr14 | 93016557 93016593 + | 0        | 0        | 0        |
| Simple_repeat  | Simple_repeat  | (A)n    | chr14 | 93111829 93111907 + | 0        | 0        | 0        |
| Other          | Other          | RMER1B  | chr14 | 95329437 95330393 + | 0        | 0        | 0        |
| SINE           | Alu            | B1_Mus2 | chr14 | 95348287 95348431 + | 0        | 0        | 0        |
| Simple_repeat  | Simple_repeat  | (A)n    | chr14 | 95348432 95348488 + | 0        | 0        | 0.342623 |
| LTR            | MaLR           | MTA_Mm  | chr14 | 97045928 97046323 - | 0        | 0        | 0        |
| LTR            | MaLR           | MTA_Mm  | chr14 | 98107339 98107733 + | 0        | 0        | 0        |
| SINE           | Alu            | B1_Mur3 | chr10 | 62884591 62884733 - | 0        | 0        | 0        |
| SINE           | Alu            | B1_Mus2 | chr14 | 99381824 99381970 + | 0        | 0        | 0        |
| Simple_repeat  | Simple_repeat  | (A)n    | chr14 | 99381971 99381994 + | 0        | 0        | 0        |
| LTR            | MaLR           | MTA_Mm  | chr14 | 99414897 99415290 - | 0        | 0        | 0        |
| SINE           | Alu            | B1_Mus2 | chr14 | 99749395 99749543 - | 0        | 0        | 0        |
| LTR            | MaLR           | MLT1D   | chr14 | 10017069 10017110 + | 0        | 0        | 0        |
| Low_complexity | Low_complexity | A-rich  | chr14 | 10075723 10075731 + | 0        | 0        | 0        |
| SINE           | Alu            | B1_Mm   | chr14 | 10095447 10095462 + | 0        | 0        | 0        |
| Simple_repeat  | Simple_repeat  | (A)n    | chr14 | 10095462 10095465 + | 0        | 0        | 0        |
| SINE           | Alu            | B1_Mus1 | chr14 | 10102155 10102167 - | 0        | 0        | 0        |
| SINE           | B2             | B2_Mm1a | chr14 | 10102481 10102500 + | 0        | 0        | 0.342623 |
| Simple_repeat  | Simple_repeat  | (A)n    | chr14 | 10102500 10102503 + | 0        | 0        | 0.342623 |
| SINE           | Alu            | B1_Mus2 | chr14 | 10103243 10103256 + | 0        | 0        | 0        |
| Simple_repeat  | Simple_repeat  | (A)n    | chr14 | 10103256 10103261 + | 0        | 0        | 0        |
| Simple_repeat  | Simple_repeat  | (A)n    | chr14 | 10133167 10133172 + | 0        | 0        | 0        |
| LINE           | L1             | L1_Mus3 | chr14 | 10155160 10155750 - | 0        | 0        | 0        |
| SINE           | Alu            | B1_Mm   | chr14 | 10178348 10178363 - | 0        | 0        | 0        |
| LTR            | MaLR           | MTB     | chr14 | 10253322 10253359 - | 0        | 0        | 0        |
| Simple_repeat  | Simple_repeat  | (A)n    | chr14 | 10257111 10257115 + | 0        | 0        | 0        |
| Simple_repeat  | Simple_repeat  | (A)n    | chr14 | 10443039 10443043 + | 0        | 0        | 0        |
| SINE           | Alu            | PB1     | chr14 | 10549469 10549479 + | 0        | 0        | 0        |
| Simple_repeat  | Simple_repeat  | (A)n    | chr14 | 10557706 10557709 + | 0        | 0.708814 | 1.48199  |
| LTR            | MaLR           | MTA_Mm  | chr14 | 10559163 10559202 + | 0        | 0        | 0        |
| SINE           | Alu            | B1_Mus2 | chr14 | 10623259 10623274 - | 0        | 0        | 0        |
| SINE           | Alu            | B1_Mm   | chr14 | 10623854 10623868 - | 0        | 0        | 0        |
| LTR            | MaLR           | MTA_Mm  | chr14 | 10628477 10628515 + | 0        | 0        | 0        |
| LTR            | MaLR           | MTA_Mm  | chr14 | 10650143 10650182 + | 0        | 0        | 0        |
| LINE           | L1             | L1Md_F2 | chr14 | 10669398 10670009 - | 0        | 0        | 0        |
| SINE           | Alu            | B1_Mus1 | chr14 | 10847815 10847830 - | 0        | 0        | 0        |
| SINE           | Alu            | B1_Mm   | chr14 | 10918652 10918666 + | 0        | 0        | 0        |

|               |               |         |       |                     |          |         |          |
|---------------|---------------|---------|-------|---------------------|----------|---------|----------|
| Simple_repeat | Simple_repeat | (A)n    | chr14 | 10918667 10918670 + | 0        | 0       | 0        |
| SINE          | Alu           | B1_Mus2 | chr14 | 10922869 10922884 + | 0        | 0       | 0        |
| Simple_repeat | Simple_repeat | (A)n    | chr14 | 10922884 10922887 + | 0        | 0       | 0        |
| SINE          | Alu           | B1_Mus1 | chr14 | 10923655 10923669 - | 2.10535  | 2.12644 | 2.80392  |
| LINE          | L1            | L1Md_F2 | chr14 | 10962569 10963070 + | 0        | 0       | 0        |
| SINE          | Alu           | B1_Mus2 | chr14 | 10999873 10999888 - | 0        | 0       | 0        |
| LTR           | MaLR          | MTA_Mm  | chr14 | 11060949 11060988 + | 0        | 0       | 0        |
| LTR           | MaLR          | MTA_Mm  | chr14 | 11160574 11160613 + | 0        | 0       | 0        |
| Simple_repeat | Simple_repeat | (A)n    | chr10 | 9011677 9011712 +   | 0        | 0       | 0        |
| Simple_repeat | Simple_repeat | (A)n    | chr14 | 11164912 11164916 + | 0        | 0       | 0        |
| LINE          | L1            | L1_Mus1 | chr14 | 11206243 11206848 + | 0        | 0       | 0        |
| SINE          | Alu           | B1_Mm   | chr14 | 11213639 11213654 - | 0        | 0       | 0        |
| Simple_repeat | Simple_repeat | (A)n    | chr10 | 9020387 9020425 +   | 0        | 0       | 0        |
| Simple_repeat | Simple_repeat | (A)n    | chr14 | 11237863 11237867 + | 0        | 0       | 0        |
| SINE          | Alu           | B1_Mus1 | chr14 | 11241687 11241701 + | 0        | 0       | 0        |
| Simple_repeat | Simple_repeat | (A)n    | chr14 | 11241701 11241704 + | 0        | 0       | 0        |
| SINE          | Alu           | B1_Mm   | chr14 | 11321486 11321501 - | 0        | 0       | 0        |
| Simple_repeat | Simple_repeat | (A)n    | chr14 | 11364173 11364177 + | 0        | 0       | 0        |
| LTR           | MaLR          | MTA_Mm  | chr14 | 11378648 11378687 + | 0        | 0       | 0        |
| Simple_repeat | Simple_repeat | (A)n    | chr14 | 11413550 11413554 + | 0        | 0       | 0        |
| Simple_repeat | Simple_repeat | (A)n    | chr14 | 11440201 11440205 + | 0        | 0       | 0        |
| Simple_repeat | Simple_repeat | (A)n    | chr14 | 11470015 11470018 + | 0        | 0       | 0        |
| LTR           | MaLR          | MTA_Mm  | chr14 | 11492620 11492660 + | 0        | 0       | 0        |
| Simple_repeat | Simple_repeat | (A)n    | chr14 | 11523098 11523107 + | 0        | 0       | 0        |
| SINE          | Alu           | B1_Mur4 | chr14 | 11534407 11534420 + | 0        | 0       | 0        |
| Simple_repeat | Simple_repeat | (A)n    | chr14 | 11534420 11534423 + | 0.332194 | 0       | 0        |
| SINE          | Alu           | B1_Mm   | chr10 | 64495753 64495899 + | 0        | 0       | 0        |
| Simple_repeat | Simple_repeat | (A)n    | chr10 | 64495900 64495943 + | 0        | 0       | 0        |
| LINE          | L1            | L1Md_T  | chr10 | 64845963 64852617 - | 0        | 0       | 0        |
| SINE          | Alu           | B1_Mm   | chr14 | 12035128 12035143 - | 0        | 0       | 0        |
| Simple_repeat | Simple_repeat | (A)n    | chr14 | 12047952 12047955 + | 0        | 0       | 0        |
| SINE          | Alu           | B1_Mus2 | chr14 | 12119072 12119086 - | 0        | 0       | 0        |
| SINE          | Alu           | B1_Mus1 | chr14 | 12123753 12123766 - | 0        | 0       | 0        |
| LTR           | MaLR          | MTA_Mm  | chr14 | 12129336 12129375 + | 0        | 0       | 0        |
| SINE          | Alu           | B1_Mus2 | chr14 | 12182666 12182681 - | 0        | 0       | 0        |
| SINE          | Alu           | B1_Mm   | chr14 | 12220424 12220438 - | 0        | 0       | 0        |
| SINE          | Alu           | B1_Mus2 | chr14 | 12227381 12227396 + | 0        | 0       | 0        |
| Simple_repeat | Simple_repeat | (A)n    | chr14 | 12227396 12227398 + | 0        | 0       | 0        |
| LTR           | MaLR          | MTA_Mm  | chr14 | 12248761 12248800 + | 0        | 0       | 0        |
| Simple_repeat | Simple_repeat | (A)n    | chr14 | 12289134 12289140 + | 0        | 0       | 0.957947 |
| SINE          | Alu           | B1_Mur3 | chr14 | 12292958 12292971 + | 0        | 0       | 0.615324 |
| Simple_repeat | Simple_repeat | (A)n    | chr14 | 12292971 12292975 + | 0        | 0       | 0.615324 |
| Simple_repeat | Simple_repeat | (A)n    | chr10 | 65177157 65177211 + | 0        | 0       | 0        |
| Simple_repeat | Simple_repeat | (A)n    | chr10 | 65207753 65207789 + | 0        | 0       | 0        |
| Simple_repeat | Simple_repeat | (A)n    | chr15 | 3807997 3808039 +   | 0        | 0       | 0        |
| LINE          | L1            | L1Md_F3 | chr15 | 4657870 4663803 -   | 0        | 0       | 0        |
| LTR           | MaLR          | MTA_Mm  | chr15 | 4827160 4827554 +   | 0.332194 | 0       | 0        |
| LTR           | MaLR          | MTA_Mm  | chr15 | 4828647 4829019 +   | 0        | 0       | 0        |
| LINE          | L1            | L1Md_F2 | chr15 | 5677950 5683288 -   | 0        | 0       | 0.615324 |
| LTR           | MaLR          | MTB     | chr15 | 5790441 5790841 +   | 0        | 0       | 0        |
| LTR           | MaLR          | MTA_Mm  | chr15 | 5875425 5875819 -   | 0        | 0       | 0        |
| LTR           | MaLR          | MTA_Mm  | chr15 | 5950127 5950522 -   | 0        | 0       | 0        |
| SINE          | Alu           | B1_Mus2 | chr15 | 6467087 6467233 +   | 0        | 0       | 0        |
| Simple_repeat | Simple_repeat | (A)n    | chr15 | 6467234 6467277 +   | 0        | 0       | 0        |
| LTR           | MaLR          | MTA_Mm  | chr15 | 7003927 7004319 -   | 0        | 0       | 0        |
| LTR           | MaLR          | MTA_Mm  | chr15 | 7005413 7005805 -   | 0        | 0       | 0        |
| SINE          | Alu           | B1_Mm   | chr15 | 8054073 8054219 -   | 0        | 0       | 0        |
| SINE          | Alu           | B1_Mus1 | chr15 | 8398524 8398667 -   | 0        | 0       | 0        |
| SINE          | Alu           | B1_Mus2 | chr15 | 8538484 8538629 -   | 0        | 0       | 0        |
| Simple_repeat | Simple_repeat | (A)n    | chr15 | 8552489 8552525 +   | 0        | 0       | 0.342623 |
| SINE          | Alu           | B1_Mus2 | chr15 | 8667671 8667816 +   | 0        | 0       | 0        |
| Simple_repeat | Simple_repeat | (A)n    | chr15 | 8667817 8667842 +   | 0        | 0       | 0        |
| LTR           | MaLR          | MTD     | chr15 | 9858443 9858761 -   | 0        | 0       | 0        |
| Simple_repeat | Simple_repeat | (A)n    | chr15 | 9982582 9982638 +   | 0        | 0       | 0        |
| SINE          | Alu           | B1_Mm   | chr15 | 10044268 10044413 + | 0        | 0       | 0        |
| SINE          | Alu           | B1_Mus2 | chr15 | 10375787 10375933 + | 0        | 0       | 0        |
| Simple_repeat | Simple_repeat | (A)n    | chr15 | 10375934 10375959 + | 0        | 0       | 0        |

|               |               |         |       |                     |          |          |          |
|---------------|---------------|---------|-------|---------------------|----------|----------|----------|
| LTR           | MaLR          | MTA_Mm  | chr15 | 10839967 10840361 + | 0        | 0        | 0        |
| LTR           | MaLR          | MTA_Mm  | chr15 | 11497143 11497536 - | 0        | 0        | 0        |
| Simple_repeat | Simple_repeat | (A)n    | chr15 | 11960795 11960822 + | 0        | 0        | 0        |
| SINE          | Alu           | B1_Mus2 | chr15 | 11993895 11994041 - | 0        | 0        | 0        |
| SINE          | Alu           | B1_Mus1 | chr15 | 12132740 12132884 + | 0        | 0        | 0        |
| Simple_repeat | Simple_repeat | (A)n    | chr15 | 12132896 12132932 + | 0        | 0        | 0        |
| LTR           | ERV1          | RLTR23  | chr10 | 66240038 66240386 + | 0        | 0        | 0        |
| LTR           | MaLR          | MTC     | chr15 | 12611227 12611700 + | 0        | 0        | 0        |
| LTR           | MaLR          | MTA_Mm  | chr15 | 12624811 12625205 + | 0        | 0        | 0        |
| Simple_repeat | Simple_repeat | (A)n    | chr15 | 14393360 14393405 + | 0        | 0        | 0        |
| LTR           | MaLR          | MTA_Mm  | chr15 | 14439838 14440233 + | 0        | 0        | 0        |
| Simple_repeat | Simple_repeat | (A)n    | chr15 | 14484912 14484938 + | 0        | 0        | 0        |
| Simple_repeat | Simple_repeat | (TTTA)n | chr15 | 14532786 14532831 + | 0        | 0        | 0        |
| Simple_repeat | Simple_repeat | (A)n    | chr15 | 14694583 14694613 + | 0        | 0        | 0        |
| Simple_repeat | Simple_repeat | (A)n    | chr15 | 14708750 14708775 + | 0        | 0        | 0        |
| SINE          | Alu           | B1_Mus1 | chr10 | 66398035 66398181 + | 0        | 0        | 0        |
| Simple_repeat | Simple_repeat | (A)n    | chr10 | 66398182 66398246 + | 0        | 0        | 0        |
| SINE          | Alu           | B1_Mm   | chr10 | 66441809 66441961 + | 0        | 0        | 0        |
| LINE          | L1            | L1Md_T  | chr15 | 15832021 15838443 - | 0        | 0.380568 | 0        |
| LTR           | MaLR          | MTA_Mm  | chr15 | 15859483 15859876 - | 0        | 0        | 0        |
| Simple_repeat | Simple_repeat | (A)n    | chr15 | 16019378 16019398 + | 0        | 0        | 0.342623 |
| SINE          | Alu           | B1_Mus2 | chr15 | 16076084 16076223 - | 0        | 0        | 0.342623 |
| LTR           | MaLR          | MTA_Mm  | chr15 | 16223362 16223756 - | 0        | 0        | 0        |
| SINE          | Alu           | B1_Mus2 | chr15 | 17360675 17360820 + | 0        | 0        | 0        |
| LTR           | MaLR          | MTA_Mm  | chr15 | 17408821 17409205 + | 0        | 0        | 0        |
| SINE          | Alu           | B1_Mus1 | chr15 | 17572178 17572325 - | 0        | 0        | 0.342623 |
| LTR           | MaLR          | MTB     | chr15 | 17782107 17782506 + | 0        | 0        | 0        |
| Simple_repeat | Simple_repeat | (A)n    | chr15 | 17880567 17880673 + | 0        | 0        | 0        |
| Simple_repeat | Simple_repeat | (A)n    | chr15 | 17976628 17976703 + | 0        | 0        | 0        |
| LINE          | L1            | L1Md_T  | chr15 | 18594167 18600499 - | 0        | 0        | 0        |
| Simple_repeat | Simple_repeat | (A)n    | chr15 | 19194615 19194645 + | 0        | 0        | 0        |
| LINE          | L1            | L1Md_F2 | chr15 | 19226885 19232918 - | 0        | 0        | 0        |
| LINE          | L1            | L1Md_F2 | chr15 | 19488473 19493557 + | 0        | 0        | 0        |
| Simple_repeat | Simple_repeat | (A)n    | chr15 | 19863428 19863458 + | 0        | 0        | 0        |
| SINE          | Alu           | B1_Mus1 | chr15 | 20052884 20053023 + | 0        | 0        | 0        |
| Simple_repeat | Simple_repeat | (A)n    | chr15 | 20053024 20053094 + | 0        | 0        | 0        |
| LTR           | MaLR          | MTB     | chr15 | 20719902 20720299 - | 0        | 0        | 0        |
| Simple_repeat | Simple_repeat | (A)n    | chr15 | 20723717 20723784 + | 0.591053 | 2.83525  | 0        |
| LINE          | L1            | L1Md_F2 | chr15 | 21839003 21844238 + | 0        | 0        | 0        |
| LINE          | L1            | L1Md_F2 | chr15 | 22118695 22125281 - | 0        | 0        | 0        |
| SINE          | Alu           | B1_Mm   | chr15 | 22322082 22322229 + | 0        | 0        | 0        |
| Simple_repeat | Simple_repeat | (A)n    | chr15 | 22322230 22322254 + | 0        | 0        | 0        |
| SINE          | Alu           | B1_Mus1 | chr15 | 22692075 22692202 - | 0        | 0        | 0        |
| Simple_repeat | Simple_repeat | (A)n    | chr15 | 22762211 22762250 + | 3.23032  | 2.43746  | 2.80392  |
| SINE          | Alu           | B1_Mus2 | chr15 | 22771370 22771515 - | 0.591053 | 0        | 0        |
| SINE          | Alu           | B1_Mus1 | chr15 | 22929537 22929683 + | 1.64268  | 1.85052  | 1.57327  |
| Simple_repeat | Simple_repeat | (A)n    | chr15 | 22929684 22929765 + | 0.591053 | 1.85052  | 1.91589  |
| Simple_repeat | Simple_repeat | (A)n    | chr15 | 23708069 23708092 + | 0        | 0        | 0        |
| SINE          | Alu           | B1_Mus1 | chr15 | 24976069 24976222 + | 0        | 0        | 0        |
| Simple_repeat | Simple_repeat | (A)n    | chr15 | 24976223 24976264 + | 0        | 0        | 0        |
| Simple_repeat | Simple_repeat | (A)n    | chr10 | 67111207 67111243 + | 0        | 0        | 0        |
| Simple_repeat | Simple_repeat | (A)n    | chr15 | 26218792 26218830 + | 0        | 0        | 0        |
| LTR           | MaLR          | MTA_Mm  | chr15 | 26948751 26949146 + | 0        | 0        | 0        |
| Simple_repeat | Simple_repeat | (A)n    | chr15 | 26954149 26954183 + | 0        | 0        | 0        |
| LTR           | MaLR          | MTA_Mm  | chr15 | 27141469 27141865 - | 0        | 0        | 0        |
| LTR           | MaLR          | MTA_Mm  | chr15 | 27302761 27303155 + | 0        | 0        | 0        |
| Simple_repeat | Simple_repeat | (A)n    | chr10 | 67300918 67300955 + | 0        | 0        | 0        |
| Simple_repeat | Simple_repeat | (A)n    | chr15 | 28846888 28846973 + | 0        | 0        | 0        |
| SINE          | Alu           | B1_Mus2 | chr15 | 28860535 28860683 - | 0        | 0        | 0        |
| SINE          | Alu           | B1_Mus2 | chr15 | 31860530 31860676 - | 0        | 0        | 0        |
| LTR           | MaLR          | MTA_Mm  | chr15 | 32005147 32005543 + | 0        | 0        | 0        |
| SINE          | Alu           | B1_Mus2 | chr15 | 34367090 34367193 + | 0        | 0        | 0        |
| Simple_repeat | Simple_repeat | (A)n    | chr15 | 34367194 34367224 + | 0        | 0        | 0        |
| Simple_repeat | Simple_repeat | (A)n    | chr15 | 34609414 34609448 + | 1.77316  | 0.708814 | 0.685246 |
| Simple_repeat | Simple_repeat | (A)n    | chr15 | 34690107 34690178 + | 0        | 0        | 0        |
| LINE          | L1            | L1_Mus2 | chr15 | 35899137 35904590 - | 0.591053 | 0        | 0        |
| SINE          | Alu           | B1_Mus2 | chr15 | 36567894 36568045 - | 0        | 0        | 0        |

|               |               |         |       |                     |          |          |          |
|---------------|---------------|---------|-------|---------------------|----------|----------|----------|
| Simple_repeat | Simple_repeat | (A)n    | chr15 | 36658916 36658938 + | 0        | 0        | 0        |
| Simple_repeat | Simple_repeat | (A)n    | chr15 | 36764070 36764130 + | 0        | 0        | 0        |
| LTR           | MaLR          | MTA_Mm  | chr15 | 36789268 36789664 - | 0        | 0        | 0        |
| LTR           | MaLR          | MTA_Mm  | chr15 | 36790368 36790764 - | 0        | 0        | 0        |
| SINE          | Alu           | B1_Mm   | chr15 | 37057208 37057290 - | 0        | 0        | 0        |
| Simple_repeat | Simple_repeat | (A)n    | chr15 | 38105225 38105252 + | 0        | 0        | 0        |
| SINE          | Alu           | B1_Mus2 | chr15 | 38124395 38124540 - | 0        | 0        | 0        |
| LTR           | MaLR          | MTA_Mm  | chr15 | 38276168 38276561 + | 0        | 0        | 0        |
| SINE          | Alu           | B1_Mur4 | chr15 | 38720895 38721041 + | 0.591053 | 0.708814 | 0        |
| Simple_repeat | Simple_repeat | (A)n    | chr15 | 38721042 38721063 + | 0.591053 | 1.08938  | 0        |
| SINE          | Alu           | B1_Mus1 | chr15 | 38723785 38723925 + | 0        | 1.08938  | 0        |
| Simple_repeat | Simple_repeat | (CAAA)n | chr15 | 38723926 38723977 + | 0        | 1.08938  | 0.615324 |
| SINE          | Alu           | B1_Mus1 | chr15 | 39596807 39596952 - | 0        | 0        | 0        |
| scRNA         | scRNA         | 4.5SRNA | chr15 | 39596953 39597044 - | 0        | 0        | 0        |
| SINE          | B2            | B2_Mm2  | chr10 | 68503600 68503788 - | 0        | 0        | 0        |
| LTR           | MaLR          | MTA_Mm  | chr15 | 40086067 40086460 - | 0        | 0        | 0        |
| LTR           | MaLR          | MTA_Mm  | chr15 | 40114188 40114572 + | 0        | 0        | 0        |
| Simple_repeat | Simple_repeat | (A)n    | chr15 | 40360695 40360745 + | 0        | 0        | 0        |
| Simple_repeat | Simple_repeat | (A)n    | chr10 | 68561307 68561347 + | 0        | 0        | 0        |
| SINE          | Alu           | B1_Mus1 | chr15 | 40460915 40461055 + | 0        | 0        | 0        |
| Simple_repeat | Simple_repeat | (A)n    | chr15 | 40461056 40461088 + | 0        | 0        | 0        |
| LTR           | MaLR          | MTA_Mm  | chr15 | 40974871 40975266 - | 0        | 0        | 0        |
| Simple_repeat | Simple_repeat | (A)n    | chr10 | 68648895 68648930 + | 0        | 0        | 0        |
| LTR           | MaLR          | MTA_Mm  | chr15 | 43209044 43209437 - | 0.591053 | 0        | 0        |
| Simple_repeat | Simple_repeat | (A)n    | chr10 | 68786713 68786748 + | 0        | 0        | 0        |
| SINE          | Alu           | B1_Mus1 | chr15 | 43703792 43703937 - | 0        | 0        | 0        |
| LTR           | MaLR          | MTA_Mm  | chr15 | 43769725 43770119 - | 0        | 0        | 0        |
| LTR           | MaLR          | MTA_Mm  | chr15 | 43873844 43874239 - | 0        | 0        | 0        |
| Simple_repeat | Simple_repeat | (A)n    | chr10 | 68866747 68866786 + | 0        | 0        | 0        |
| Simple_repeat | Simple_repeat | (A)n    | chr15 | 45222530 45222586 + | 0        | 0        | 0        |
| Simple_repeat | Simple_repeat | (A)n    | chr15 | 45232684 45232716 + | 0        | 0        | 0        |
| LINE          | L1            | L1Md_T  | chr15 | 45415068 45422145 - | 0        | 0        | 0        |
| Simple_repeat | Simple_repeat | (GAAA)n | chr15 | 45456999 45457160 + | 0        | 0        | 0        |
| SINE          | Alu           | B1_Mm   | chr15 | 46154516 46154662 - | 0        | 0        | 0        |
| Simple_repeat | Simple_repeat | (A)n    | chr15 | 46338493 46338529 + | 0        | 0        | 0        |
| SINE          | Alu           | B1_Mus2 | chr15 | 46548015 46548157 - | 0        | 0        | 0        |
| Simple_repeat | Simple_repeat | (A)n    | chr15 | 46917830 46917865 + | 0        | 0        | 0        |
| SINE          | Alu           | B1_Mus2 | chr15 | 48883032 48883176 - | 0        | 0        | 0        |
| SINE          | Alu           | B1_Mus1 | chr15 | 48889679 48889825 - | 0        | 0        | 0        |
| Simple_repeat | Simple_repeat | (A)n    | chr15 | 49483091 49483123 + | 0        | 0        | 0        |
| LTR           | MaLR          | MTA_Mm  | chr15 | 49752109 49752505 - | 0        | 0        | 0        |
| LTR           | MaLR          | MTA_Mm  | chr15 | 50109869 50110265 - | 0        | 0        | 0        |
| Simple_repeat | Simple_repeat | (A)n    | chr15 | 50425071 50425100 + | 0        | 0        | 0        |
| LTR           | MaLR          | MTA_Mm  | chr15 | 52040744 52041138 - | 0        | 0        | 0        |
| SINE          | Alu           | B1_Mus1 | chr15 | 52041206 52041335 + | 0        | 0        | 0        |
| LINE          | L1            | L1Md_T  | chr15 | 52562376 52568805 - | 0.591053 | 0        | 0        |
| LINE          | L1            | L1Md_T  | chr15 | 54036273 54042835 - | 0        | 0        | 0        |
| SINE          | Alu           | B1_Mus1 | chr15 | 54234439 54234570 - | 0        | 0        | 0        |
| Simple_repeat | Simple_repeat | (A)n    | chr15 | 55121571 55121650 + | 0        | 0        | 0.342623 |
| SINE          | Alu           | B1_Mm   | chr10 | 69685115 69685256 + | 0        | 0        | 0        |
| Simple_repeat | Simple_repeat | (A)n    | chr10 | 69685257 69685279 + | 0        | 0        | 0        |
| SINE          | B2            | B2_Mm1t | chr15 | 56545699 56545891 + | 0        | 0        | 0        |
| Simple_repeat | Simple_repeat | (A)n    | chr15 | 56545892 56545916 + | 0.664388 | 0        | 0        |
| SINE          | Alu           | B1_Mus1 | chr15 | 56946073 56946219 - | 0        | 0        | 0        |
| Simple_repeat | Simple_repeat | (A)n    | chr15 | 57520881 57520932 + | 0        | 0        | 0        |
| SINE          | Alu           | B1_Mus1 | chr15 | 57803702 57803847 - | 0        | 0        | 0        |
| Simple_repeat | Simple_repeat | (A)n    | chr10 | 69901714 69901749 + | 0        | 0        | 0        |
| SINE          | Alu           | B1_Mus1 | chr15 | 58933180 58933329 + | 0        | 0        | 0        |
| Simple_repeat | Simple_repeat | (CAAA)n | chr15 | 58933331 58933384 + | 0        | 0        | 0        |
| SINE          | Alu           | B1_Mus1 | chr15 | 59434692 59434839 - | 0        | 0        | 0        |
| Simple_repeat | Simple_repeat | (A)n    | chr15 | 59492871 59492895 + | 0        | 0        | 0        |
| SINE          | Alu           | B1_Mus1 | chr15 | 60073931 60074077 - | 0        | 0        | 0        |
| SINE          | Alu           | B1_Mus1 | chr15 | 60390706 60390841 + | 0        | 0        | 0        |
| Simple_repeat | Simple_repeat | (A)n    | chr15 | 60390842 60390868 + | 0        | 0        | 0        |
| LTR           | MaLR          | MTA_Mm  | chr15 | 60490096 60490491 + | 0        | 0        | 0        |
| LINE          | L1            | L1Md_F2 | chr15 | 60918898 60924740 - | 0        | 0        | 0.866667 |
| SINE          | Alu           | B1_Mm   | chr15 | 61070114 61070245 + | 0        | 0        | 0        |

|                |                |         |       |                     |          |          |          |
|----------------|----------------|---------|-------|---------------------|----------|----------|----------|
| SINE           | Alu            | B1_Mm   | chr15 | 61474873 61475019 - | 0        | 0        | 0        |
| SINE           | Alu            | B1_Mus1 | chr15 | 61482345 61482491 + | 0        | 0        | 0        |
| Simple_repeat  | Simple_repeat  | (A)n    | chr15 | 61482492 61482527 + | 0        | 0        | 0        |
| SINE           | Alu            | B1_Mm   | chr15 | 61678052 61678183 - | 0        | 0        | 0        |
| SINE           | B2             | B2_Mm2  | chr15 | 62084004 62084194 - | 0        | 0        | 0        |
| LINE           | L1             | L1Md_T  | chr15 | 62518380 62525329 - | 0        | 0        | 0        |
| LINE           | L1             | L1Md_T  | chr15 | 62595637 62601999 - | 0        | 0        | 0        |
| SINE           | Alu            | B1_Mus1 | chr15 | 63224714 63224860 - | 0        | 0        | 0        |
| LTR            | MaLR           | MTB     | chr15 | 63899778 63900148 - | 0.591053 | 0        | 0        |
| Simple_repeat  | Simple_repeat  | (A)n    | chr15 | 64272356 64272396 + | 0        | 0.380568 | 0        |
| LINE           | L1             | L1_Mus1 | chr15 | 64434059 64440297 - | 0        | 0        | 0        |
| Simple_repeat  | Simple_repeat  | (A)n    | chr15 | 66807917 66807950 + | 0        | 0        | 0        |
| SINE           | Alu            | B1_Mm   | chr15 | 67791574 67791720 + | 0        | 0        | 0        |
| Simple_repeat  | Simple_repeat  | (A)n    | chr15 | 67791721 67791755 + | 0        | 0        | 0        |
| LTR            | MaLR           | MTA_Mm  | chr15 | 67832761 67833162 - | 0        | 0        | 0        |
| LTR            | MaLR           | MTA_Mm  | chr15 | 68535637 68536031 + | 0        | 0        | 0        |
| SINE           | Alu            | B1_Mus2 | chr15 | 69508447 69508581 + | 0        | 0        | 0        |
| Simple_repeat  | Simple_repeat  | (A)n    | chr15 | 69508582 69508610 + | 0        | 0        | 0        |
| LTR            | MaLR           | ORR1D2  | chr15 | 70085287 70085634 - | 0        | 0        | 0        |
| SINE           | Alu            | B1_Mus2 | chr15 | 70210401 70210547 - | 0        | 0        | 0        |
| LTR            | MaLR           | MTA_Mm  | chr15 | 70279789 70280183 - | 0        | 0        | 0        |
| LTR            | MaLR           | MTA_Mm  | chr15 | 70720534 70720928 + | 0        | 0        | 0        |
| LINE           | L1             | L1_Mus3 | chr15 | 70902819 70908431 + | 0        | 0        | 0        |
| SINE           | Alu            | B1_Mus2 | chr15 | 71901244 71901390 + | 0        | 0        | 0        |
| Simple_repeat  | Simple_repeat  | (A)n    | chr15 | 72320428 72320463 + | 0        | 0        | 0        |
| SINE           | Alu            | B1_Mus1 | chr15 | 73775312 73775458 + | 0        | 0        | 0        |
| Simple_repeat  | Simple_repeat  | (A)n    | chr15 | 73775459 73775483 + | 0        | 0        | 0        |
| Simple_repeat  | Simple_repeat  | (A)n    | chr15 | 74009693 74009741 + | 0        | 0        | 0        |
| LTR            | MaLR           | MTA_Mm  | chr10 | 71331831 71332227 - | 0        | 0        | 0        |
| SINE           | Alu            | B1F     | chr15 | 74704995 74705120 + | 0        | 0        | 0        |
| Simple_repeat  | Simple_repeat  | (A)n    | chr15 | 74705121 74705145 + | 0.591053 | 0        | 0        |
| LINE           | L1             | L1Md_F  | chr15 | 74930032 74934585 - | 0        | 0        | 0        |
| LTR            | MaLR           | MTA_Mm  | chr15 | 75085896 75086297 + | 0        | 0        | 0        |
| SINE           | B2             | B2_Mm1a | chr10 | 71447435 71447625 - | 0        | 0        | 0        |
| SINE           | B2             | B2_Mm1a | chr15 | 75704296 75704483 - | 0.332194 | 0        | 0        |
| SINE           | B2             | B2_Mm1t | chr15 | 75705155 75705287 - | 0        | 0        | 0        |
| SINE           | Alu            | B1_Mus1 | chr15 | 75705307 75705447 - | 0        | 0        | 0        |
| SINE           | Alu            | B1_Mm   | chr15 | 76172913 76173047 - | 0        | 0        | 0        |
| SINE           | Alu            | B1_Mm   | chr15 | 76361352 76361498 + | 0        | 0.708814 | 0.342623 |
| Simple_repeat  | Simple_repeat  | (A)n    | chr15 | 76361499 76361540 + | 0        | 0.708814 | 0.342623 |
| SINE           | Alu            | B1_Mm   | chr15 | 76660238 76660351 + | 0        | 0        | 0        |
| Simple_repeat  | Simple_repeat  | (A)n    | chr15 | 76660352 76660395 + | 0        | 0        | 0        |
| Simple_repeat  | Simple_repeat  | (A)n    | chr15 | 77153214 77153260 + | 0        | 0        | 0        |
| SINE           | B2             | B2_Mm2  | chr15 | 77165556 77165743 + | 0        | 0        | 0        |
| Simple_repeat  | Simple_repeat  | (A)n    | chr15 | 77165744 77165770 + | 0        | 0        | 0        |
| SINE           | Alu            | B1_Mm   | chr15 | 77507257 77507402 - | 0        | 0        | 0        |
| SINE           | Alu            | B1_Mus2 | chr15 | 77693991 77694137 + | 0        | 0        | 0        |
| SINE           | Alu            | B1_Mus1 | chr15 | 77697941 77698087 - | 0        | 0        | 0        |
| LTR            | MaLR           | MTA_Mm  | chr15 | 77700938 77701304 + | 0        | 0        | 0        |
| Simple_repeat  | Simple_repeat  | (A)n    | chr15 | 78646632 78646661 + | 0        | 0        | 0        |
| SINE           | Alu            | B1_Mus2 | chr15 | 78751588 78751734 - | 0        | 0        | 0        |
| Simple_repeat  | Simple_repeat  | (A)n    | chr15 | 78893721 78893753 + | 0        | 0        | 0        |
| SINE           | B4             | B4A     | chr15 | 79159325 79159535 - | 0        | 0        | 0        |
| SINE           | Alu            | B1_Mus2 | chr15 | 79246418 79246564 - | 0        | 0        | 0        |
| SINE           | Alu            | B1_Mus2 | chr15 | 79286518 79286663 + | 0        | 0        | 0        |
| Simple_repeat  | Simple_repeat  | (A)n    | chr15 | 79286664 79286689 + | 0        | 0        | 0.342623 |
| SINE           | Alu            | B1_Mm   | chr15 | 79385452 79385597 - | 0        | 0        | 0        |
| SINE           | Alu            | B1_Mus2 | chr15 | 79386946 79387087 - | 0        | 0        | 0        |
| SINE           | Alu            | B1_Mus1 | chr10 | 71932560 71932702 + | 0        | 0        | 0        |
| Simple_repeat  | Simple_repeat  | (A)n    | chr10 | 71932703 71932797 + | 0        | 0        | 0        |
| LTR            | MaLR           | MTA_Mm  | chr10 | 72017834 72018228 - | 0        | 0        | 0        |
| SINE           | Alu            | B1_Mus2 | chr15 | 80439658 80439794 - | 0        | 0        | 0        |
| Simple_repeat  | Simple_repeat  | (A)n    | chr15 | 80446059 80446085 + | 0        | 0        | 0        |
| Low_complexity | Low_complexity | A-rich  | chr10 | 72084495 72084564 + | 0        | 0.708814 | 0        |
| SINE           | Alu            | B1_Mus2 | chr10 | 72137753 72137899 + | 6.86594  | 7.60204  | 14.3299  |
| Simple_repeat  | Simple_repeat  | (A)n    | chr10 | 72137900 72137922 + | 1.77316  | 2.12644  | 2.18859  |
| LTR            | MaLR           | MTB     | chr10 | 72188701 72189085 + | 0        | 0        | 0        |

|                |                |          |       |                     |          |          |          |
|----------------|----------------|----------|-------|---------------------|----------|----------|----------|
| Simple_repeat  | Simple_repeat  | (A)n     | chr10 | 72244293 72244325 + | 0        | 0        | 0        |
| SINE           | Alu            | B1_Mus2  | chr15 | 81658572 81658718 + | 0        | 2.17876  | 0.685246 |
| Simple_repeat  | Simple_repeat  | (A)n     | chr15 | 81794624 81794649 + | 0        | 0        | 0        |
| SINE           | B2             | B2_Mm1a  | chr15 | 81973809 81974002 + | 0        | 0        | 0        |
| Simple_repeat  | Simple_repeat  | (A)n     | chr15 | 82392497 82392525 + | 0        | 0        | 0        |
| SINE           | Alu            | B1_Mm    | chr15 | 82466231 82466377 + | 0        | 0        | 0        |
| Simple_repeat  | Simple_repeat  | (A)n     | chr15 | 82466378 82466408 + | 0        | 0        | 0        |
| SINE           | Alu            | B1_Mus1  | chr15 | 83014802 83014939 - | 0        | 0        | 0        |
| SINE           | Alu            | B1_Mus2  | chr15 | 83428734 83428880 + | 0        | 0        | 0        |
| Simple_repeat  | Simple_repeat  | (A)n     | chr15 | 83428881 83428911 + | 0        | 0        | 0        |
| SINE           | Alu            | B1_Mus1  | chr10 | 72740036 72740182 + | 1.5143   | 0        | 0        |
| Simple_repeat  | Simple_repeat  | (A)n     | chr10 | 72740183 72740208 + | 1.5143   | 0        | 0        |
| Simple_repeat  | Simple_repeat  | (A)n     | chr10 | 72744935 72744970 + | 1.05163  | 2.7378   | 0.615324 |
| Simple_repeat  | Simple_repeat  | (A)n     | chr15 | 85346790 85346819 + | 0        | 0        | 0        |
| SINE           | B4             | B4       | chr15 | 85435549 85435802 - | 0.591053 | 0        | 0.342623 |
| SINE           | Alu            | B1_Mm    | chr15 | 86022722 86022868 - | 0        | 0        | 0        |
| LTR            | MaLR           | MTA_Mm   | chr15 | 86605478 86605872 - | 0        | 0        | 0        |
| SINE           | Alu            | B1_Mus1  | chr15 | 87358153 87358299 + | 0        | 0        | 0        |
| Simple_repeat  | Simple_repeat  | (A)n     | chr15 | 87358300 87358330 + | 0        | 0        | 0        |
| SINE           | Alu            | B1_Mur2  | chr15 | 88454134 88454281 + | 0        | 0        | 0        |
| Simple_repeat  | Simple_repeat  | (A)n     | chr15 | 88454282 88454307 + | 0        | 0        | 0        |
| SINE           | Alu            | B1_Mur3  | chr15 | 89041325 89041465 + | 0        | 0        | 0        |
| Simple_repeat  | Simple_repeat  | (A)n     | chr15 | 89041466 89041488 + | 0        | 0        | 0        |
| SINE           | Alu            | B1_Mus2  | chr15 | 89214462 89214608 - | 0        | 0        | 0        |
| Simple_repeat  | Simple_repeat  | (A)n     | chr15 | 89295381 89295458 + | 0        | 0        | 0.342623 |
| Simple_repeat  | Simple_repeat  | (A)n     | chr15 | 89500371 89500437 + | 0        | 0        | 0        |
| SINE           | Alu            | B1_Mus2  | chr15 | 89505794 89505940 - | 0        | 0        | 0        |
| LTR            | MaLR           | MTA_Mm   | chr15 | 89751116 89751512 - | 0        | 0        | 0        |
| LTR            | MaLR           | MTB      | chr15 | 90569600 90569992 + | 0        | 0        | 0        |
| LTR            | MaLR           | MTA_Mm   | chr15 | 90589570 90589962 + | 0        | 0        | 0        |
| Simple_repeat  | Simple_repeat  | (A)n     | chr15 | 91487022 91487069 + | 0        | 0.380568 | 0.615324 |
| Simple_repeat  | Simple_repeat  | (A)n     | chr15 | 95447177 95447211 + | 0        | 0        | 0        |
| SINE           | Alu            | B1_Mus2  | chr15 | 96238596 96238742 - | 0        | 0        | 0        |
| SINE           | Alu            | B1_Mur4  | chr15 | 96505799 96505947 + | 0        | 0        | 0        |
| Simple_repeat  | Simple_repeat  | (A)n     | chr15 | 96505948 96505970 + | 0        | 0        | 0        |
| Simple_repeat  | Simple_repeat  | (CAA)n   | chr15 | 96505969 96505998 + | 0        | 0        | 0        |
| SINE           | Alu            | B1_Mus2  | chr15 | 96549722 96549868 + | 0        | 0        | 0        |
| Simple_repeat  | Simple_repeat  | (A)n     | chr15 | 96549869 96549921 + | 0        | 0        | 0        |
| SINE           | Alu            | B1_Mus2  | chr15 | 96912031 96912176 - | 0        | 0        | 0        |
| LTR            | MaLR           | MTB      | chr15 | 97440885 97441268 - | 0        | 0        | 0        |
| SINE           | B2             | B2_Mm1t  | chr15 | 98014059 98014243 - | 0        | 0        | 0        |
| Simple_repeat  | Simple_repeat  | (A)n     | chr15 | 98089719 98089753 + | 0        | 0        | 0        |
| SINE           | Alu            | B1_Mm    | chr15 | 98135001 98135146 + | 0        | 0        | 0        |
| Simple_repeat  | Simple_repeat  | (A)n     | chr15 | 98135147 98135213 + | 0        | 0        | 0        |
| Simple_repeat  | Simple_repeat  | (A)n     | chr15 | 98161455 98161498 + | 0        | 0        | 0        |
| SINE           | Alu            | PB1D7    | chr15 | 98286021 98286148 - | 0        | 0        | 0        |
| Simple_repeat  | Simple_repeat  | (A)n     | chr15 | 98475680 98475719 + | 0        | 0        | 0        |
| SINE           | Alu            | B1_Mus2  | chr15 | 98855711 98855855 - | 0        | 0        | 0        |
| SINE           | Alu            | B1_Mus2  | chr15 | 98876443 98876579 - | 0        | 0        | 0        |
| SINE           | Alu            | B1_Mus2  | chr15 | 98896462 98896608 - | 0        | 0        | 0        |
| SINE           | Alu            | B1_Mm    | chr15 | 98898166 98898315 + | 0        | 0        | 0        |
| Simple_repeat  | Simple_repeat  | (A)n     | chr15 | 98898316 98898338 + | 0        | 0        | 0        |
| SINE           | B2             | B2_Mm2   | chr15 | 99100231 99100418 - | 0        | 0        | 0        |
| LTR            | MaLR           | MTA_Mm   | chr15 | 99387593 99387989 + | 0        | 0        | 0        |
| SINE           | Alu            | B1_Mus1  | chr15 | 99782723 99782870 - | 0        | 0        | 0        |
| SINE           | Alu            | B1_Mus1  | chr15 | 99862846 99862992 - | 0        | 0        | 0        |
| SINE           | Alu            | B1_Mm    | chr15 | 10026898 10026912 + | 0        | 0        | 0        |
| Simple_repeat  | Simple_repeat  | (A)n     | chr15 | 10026912 10026915 + | 0        | 0        | 0        |
| SINE           | Alu            | B1_Mm    | chr15 | 10056549 10056564 + | 0        | 0        | 0        |
| Simple_repeat  | Simple_repeat  | (A)n     | chr15 | 10056564 10056568 + | 0        | 0        | 0        |
| SINE           | Alu            | B1_Mus1  | chr10 | 74672793 74672939 - | 0        | 0        | 0        |
| SINE           | Alu            | B1_Mur4  | chr15 | 10100171 10100183 + | 0        | 0        | 0        |
| Low_complexity | Low_complexity | A-rich   | chr15 | 10100183 10100189 + | 0        | 0        | 0        |
| SINE           | Alu            | B1_Mm    | chr15 | 10212170 10212185 + | 0        | 0        | 0        |
| Simple_repeat  | Simple_repeat  | (CAAAA)n | chr15 | 10212186 10212190 + | 0        | 0        | 0        |
| SINE           | B2             | B2_Mm1a  | chr15 | 10222182 10222201 + | 60.8852  | 34.5905  | 36.4764  |
| SINE           | Alu            | B1_Mm    | chr15 | 10247784 10247799 - | 0        | 0        | 0        |



|               |               |         |       |          |          |   |          |          |          |
|---------------|---------------|---------|-------|----------|----------|---|----------|----------|----------|
| SINE          | Alu           | B1_Mm   | chr15 | 10265363 | 10265375 | - | 0        | 0        | 0        |
| SINE          | Alu           | B1_Mm   | chr10 | 74968654 | 74968800 | + | 0        | 0        | 0        |
| Simple_repeat | Simple_repeat | (A)n    | chr10 | 74968801 | 74968836 | + | 0        | 0        | 0        |
| SINE          | Alu           | B1_Mus1 | chr16 | 4014802  | 4014951  | - | 0        | 0        | 0        |
| Simple_repeat | Simple_repeat | (A)n    | chr16 | 4235194  | 4235217  | + | 0        | 0        | 0        |
| SINE          | Alu           | B1_Mus1 | chr16 | 4448644  | 4448780  | - | 0        | 0        | 0        |
| Simple_repeat | Simple_repeat | (A)n    | chr16 | 4560096  | 4560130  | + | 0        | 0        | 0.342623 |
| SINE          | Alu           | B1_Mm   | chr16 | 4568679  | 4568825  | - | 0        | 0        | 0        |
| SINE          | Alu           | B1_Mus2 | chr16 | 4581159  | 4581304  | + | 0        | 0        | 0        |
| Simple_repeat | Simple_repeat | (A)n    | chr16 | 4581305  | 4581356  | + | 0        | 0        | 0        |
| SINE          | B2            | B3      | chr16 | 4870505  | 4870705  | + | 0        | 0        | 0        |
| Simple_repeat | Simple_repeat | (A)n    | chr16 | 8470347  | 8470381  | + | 0        | 0        | 0        |
| SINE          | Alu           | B1_Mus1 | chr16 | 8779667  | 8779814  | - | 0        | 0        | 0        |
| SINE          | Alu           | B1_Mus2 | chr16 | 8794616  | 8794761  | - | 0        | 0        | 0        |
| SINE          | B2            | B2_Mm1a | chr16 | 8924187  | 8924394  | + | 0        | 0        | 0        |
| SINE          | Alu           | PB1D9   | chr10 | 75494233 | 75494352 | + | 0        | 0        | 0        |
| SINE          | Alu           | B1_Mus1 | chr16 | 10054680 | 10054826 | - | 0        | 0        | 0        |
| Simple_repeat | Simple_repeat | (A)n    | chr16 | 10816042 | 10816069 | + | 0        | 0        | 0        |
| SINE          | Alu           | B1_Mus1 | chr16 | 10903764 | 10903910 | - | 0        | 0        | 0        |
| LTR           | MaLR          | ORR1A1  | chr16 | 10949002 | 10949325 | + | 0        | 0        | 0        |
| SINE          | Alu           | B1_Mus2 | chr16 | 11955939 | 11956084 | + | 0        | 0        | 0        |
| Simple_repeat | Simple_repeat | (A)n    | chr16 | 11956085 | 11956107 | + | 0        | 0        | 0        |
| LTR           | MaLR          | MTA_Mm  | chr16 | 12388043 | 12388439 | + | 0        | 0        | 0        |
| LTR           | MaLR          | MTA_Mm  | chr16 | 12969444 | 12969838 | - | 0        | 0        | 0        |
| SINE          | Alu           | B1_Mus1 | chr16 | 13043111 | 13043257 | - | 0        | 0        | 0        |
| SINE          | B2            | B2_Mm1a | chr16 | 13056655 | 13056840 | + | 0        | 0        | 0        |
| Simple_repeat | Simple_repeat | (A)n    | chr16 | 13435821 | 13435857 | + | 0        | 0        | 0        |
| SINE          | Alu           | B1_Mm   | chr16 | 13509001 | 13509146 | - | 0.332194 | 0        | 0        |
| LTR           | MaLR          | MTA_Mm  | chr16 | 14333143 | 14333536 | + | 0        | 0        | 0        |
| LTR           | MaLR          | MTA_Mm  | chr16 | 14534685 | 14535080 | + | 0        | 0        | 0        |
| LTR           | MaLR          | MTA_Mm  | chr16 | 15024876 | 15025255 | - | 0        | 0        | 0        |
| SINE          | Alu           | B1_Mus2 | chr16 | 15474966 | 15475111 | + | 0        | 0        | 0        |
| Simple_repeat | Simple_repeat | (A)n    | chr16 | 15475112 | 15475140 | + | 0        | 0        | 0        |
| LTR           | MaLR          | MTA_Mm  | chr10 | 76125170 | 76125563 | + | 0        | 0        | 0        |
| SINE          | Alu           | B1_Mus1 | chr16 | 15606704 | 15606849 | + | 0        | 0        | 0        |
| Simple_repeat | Simple_repeat | (A)n    | chr16 | 15606850 | 15606875 | + | 0        | 0        | 0        |
| SINE          | Alu           | B1_Mus2 | chr16 | 16856149 | 16856278 | + | 0        | 0        | 0        |
| Simple_repeat | Simple_repeat | (A)n    | chr16 | 16856279 | 16856303 | + | 0        | 0        | 0        |
| LTR           | ERVK          | RMER13A | chr16 | 16856304 | 16857114 | + | 0        | 0        | 0        |
| SINE          | B2            | B2_Mm1a | chr16 | 17231872 | 17232064 | - | 0        | 0        | 0        |
| SINE          | Alu           | PB1D9   | chr16 | 17266473 | 17266590 | - | 0        | 0        | 0        |
| scRNA         | scRNA         | BC1_Mm  | chr16 | 17724447 | 17724579 | + | 0        | 0        | 0        |
| SINE          | Alu           | B1_Mus2 | chr10 | 76450934 | 76451075 | - | 0        | 0        | 0        |
| SINE          | Alu           | B1_Mus2 | chr16 | 18675318 | 18675463 | - | 0        | 0        | 0.615324 |
| SINE          | Alu           | B1_Mus1 | chr16 | 18728464 | 18728595 | - | 0        | 0        | 0        |
| SINE          | Alu           | B1_Mus2 | chr16 | 18732273 | 18732417 | - | 0        | 0        | 0        |
| Simple_repeat | Simple_repeat | (A)n    | chr16 | 19127181 | 19127272 | + | 0        | 0.380568 | 0        |
| SINE          | Alu           | B1_Mus1 | chr10 | 76632881 | 76633027 | - | 0        | 0        | 0        |
| LTR           | MaLR          | MTA_Mm  | chr16 | 19875620 | 19876019 | - | 0        | 0        | 0        |
| SINE          | Alu           | B1_Mus1 | chr16 | 20068788 | 20068935 | - | 0        | 0        | 0        |
| SINE          | Alu           | B1_Mus1 | chr16 | 20138532 | 20138679 | + | 0        | 0        | 0        |
| SINE          | Alu           | B1_Mus1 | chr16 | 20437459 | 20437573 | + | 0        | 0        | 0        |
| Simple_repeat | Simple_repeat | (A)n    | chr16 | 20437574 | 20437596 | + | 0.332194 | 0        | 0        |
| SINE          | Alu           | B1_Mus2 | chr16 | 20495584 | 20495734 | + | 0        | 0        | 0        |
| Simple_repeat | Simple_repeat | (A)n    | chr16 | 20495735 | 20495769 | + | 0        | 0        | 0        |
| SINE          | Alu           | B1_Mus1 | chr16 | 20669264 | 20669411 | - | 0        | 0.380568 | 0        |
| SINE          | Alu           | B1_Mus1 | chr16 | 20671094 | 20671225 | - | 0        | 0        | 0        |
| SINE          | Alu           | B1_Mm   | chr16 | 21178963 | 21179109 | + | 0        | 0        | 0        |
| Simple_repeat | Simple_repeat | (A)n    | chr16 | 21369020 | 21369057 | + | 0        | 0        | 0        |
| SINE          | Alu           | B1_Mus2 | chr16 | 21697498 | 21697644 | - | 0        | 0        | 0        |
| LTR           | MaLR          | MTA_Mm  | chr16 | 21725778 | 21726165 | + | 0        | 0        | 0        |
| SINE          | Alu           | B1_Mus2 | chr10 | 76885020 | 76885164 | + | 0        | 0.708814 | 0        |
| Simple_repeat | Simple_repeat | (A)n    | chr10 | 76885165 | 76885214 | + | 0        | 0        | 0        |
| SINE          | Alu           | B1_Mm   | chr16 | 22199752 | 22199903 | + | 0        | 0        | 0        |
| Simple_repeat | Simple_repeat | (A)n    | chr16 | 22199904 | 22199926 | + | 0        | 0        | 0        |
| Simple_repeat | Simple_repeat | (CAA)n  | chr16 | 22199925 | 22199948 | + | 0        | 0        | 0        |
| SINE          | Alu           | B1_Mus2 | chr16 | 22215337 | 22215482 | - | 0        | 0        | 0        |

|               |               |          |       |                     |          |          |          |
|---------------|---------------|----------|-------|---------------------|----------|----------|----------|
| SINE          | Alu           | B1_Mus2  | chr16 | 22238762 22238908 - | 0        | 0        | 0        |
| SINE          | Alu           | B1_Mm    | chr16 | 22350954 22351102 + | 0        | 0        | 0        |
| Simple_repeat | Simple_repeat | (A)n     | chr16 | 22351103 22351126 + | 0        | 0        | 0        |
| SINE          | Alu           | B1_Mm    | chr16 | 22354254 22354400 - | 0        | 0        | 0        |
| Simple_repeat | Simple_repeat | (A)n     | chr10 | 76989359 76989403 + | 0        | 0        | 0.342623 |
| Simple_repeat | Simple_repeat | (A)n     | chr16 | 22758589 22758636 + | 0        | 0        | 0        |
| Simple_repeat | Simple_repeat | (A)n     | chr10 | 77038004 77038059 + | 0        | 0        | 0        |
| Simple_repeat | Simple_repeat | (A)n     | chr16 | 23200059 23200098 + | 0        | 0        | 0        |
| LTR           | MaLR          | MTA_Mm   | chr16 | 23694555 23694952 - | 0        | 0        | 0        |
| Simple_repeat | Simple_repeat | (A)n     | chr16 | 24136768 24136797 + | 0        | 0        | 0        |
| LTR           | MaLR          | MTA_Mm   | chr10 | 77157696 77158094 - | 0        | 0        | 0        |
| SINE          | Alu           | B1_Mus2  | chr10 | 77172550 77172696 - | 0        | 0        | 0        |
| SINE          | Alu           | B1_Mm    | chr16 | 25018679 25018825 + | 0        | 0        | 0.342623 |
| Simple_repeat | Simple_repeat | (A)n     | chr16 | 25018826 25018857 + | 0        | 0        | 0.342623 |
| SINE          | Alu           | B1_Mus1  | chr16 | 25022133 25022279 - | 0        | 0        | 0        |
| SINE          | Alu           | B1_Mm    | chr10 | 77209614 77209766 + | 0        | 0        | 0        |
| Simple_repeat | Simple_repeat | (A)n     | chr10 | 77209767 77209793 + | 0        | 0        | 0        |
| Simple_repeat | Simple_repeat | (A)n     | chr16 | 26814956 26814988 + | 0        | 0        | 0        |
| Simple_repeat | Simple_repeat | (A)n     | chr16 | 27099973 27100001 + | 0.591053 | 0        | 0        |
| Simple_repeat | Simple_repeat | (A)n     | chr16 | 27498761 27498789 + | 0        | 0        | 0        |
| LINE          | L1            | L1Md_F2  | chr16 | 27691664 27696693 + | 0        | 0.708814 | 0        |
| SINE          | Alu           | B1_Mm    | chr10 | 77474328 77474474 + | 0        | 0        | 0.342623 |
| Simple_repeat | Simple_repeat | (GAAAA)n | chr10 | 77474475 77474528 + | 0.591053 | 0        | 0.342623 |
| LTR           | MaLR          | MTA_Mm   | chr16 | 27999488 27999881 + | 0        | 0        | 0        |
| LTR           | MaLR          | MTA_Mm   | chr16 | 28147218 28147601 + | 0        | 0        | 0        |
| LTR           | MaLR          | MTA_Mm   | chr16 | 28781778 28782173 + | 0        | 0        | 0        |
| LTR           | MaLR          | MTA_Mm   | chr16 | 28783268 28783663 + | 0.332194 | 0        | 0        |
| SINE          | Alu           | B1_Mus2  | chr16 | 29574703 29574862 - | 0        | 0        | 0        |
| SINE          | B2            | B2_Mm1a  | chr16 | 29765099 29765291 - | 0        | 1.01984  | 0        |
| SINE          | Alu           | B1_Mm    | chr16 | 29949683 29949822 + | 0        | 0.708814 | 0        |
| Simple_repeat | Simple_repeat | (A)n     | chr16 | 29949823 29949846 + | 0        | 0.708814 | 0        |
| SINE          | Alu           | B1_Mm    | chr16 | 30117953 30118104 - | 0        | 0        | 0        |
| SINE          | Alu           | B1_Mus2  | chr16 | 30167029 30167175 - | 0        | 0        | 0        |
| Simple_repeat | Simple_repeat | (A)n     | chr16 | 30185999 30186033 + | 0        | 0        | 0        |
| LTR           | MaLR          | MTA_Mm   | chr16 | 30199502 30199897 + | 0        | 0        | 0        |
| LTR           | MaLR          | MTA_Mm   | chr16 | 30685123 30685494 + | 0        | 0        | 0        |
| SINE          | Alu           | B1_Mus2  | chr16 | 30767442 30767588 - | 0        | 0        | 0        |
| SINE          | Alu           | B1_Mus2  | chr16 | 30874959 30875102 - | 0        | 0        | 0        |
| SINE          | Alu           | B1_Mm    | chr10 | 77825532 77825670 + | 0        | 0        | 0        |
| Simple_repeat | Simple_repeat | (A)n     | chr10 | 77825671 77825690 + | 0.332194 | 0        | 0        |
| SINE          | Alu           | B1_Mus2  | chr16 | 31524608 31524741 + | 0        | 0        | 0        |
| Simple_repeat | Simple_repeat | (A)n     | chr16 | 31524742 31524768 + | 0        | 0        | 0        |
| LTR           | MaLR          | MTC      | chr16 | 31525303 31525651 - | 0        | 0        | 0        |
| SINE          | Alu           | B1_Mus2  | chr16 | 31525652 31525798 - | 0        | 0        | 0        |
| SINE          | Alu           | B1_Mm    | chr16 | 31625368 31625514 - | 0        | 0        | 0        |
| Simple_repeat | Simple_repeat | (A)n     | chr10 | 77856501 77856534 + | 36.1014  | 24.1903  | 20.2875  |
| SINE          | B2            | B2_Mm1a  | chr16 | 32207136 32207324 + | 0        | 0        | 0        |
| Simple_repeat | Simple_repeat | (A)n     | chr16 | 32207325 32207348 + | 0.591053 | 1.08938  | 0.615324 |
| SINE          | Alu           | B1_Mus2  | chr16 | 32260522 32260667 + | 0        | 0        | 0        |
| Simple_repeat | Simple_repeat | (A)n     | chr16 | 32260676 32260728 + | 0        | 0        | 0        |
| LTR           | MaLR          | MTA_Mm   | chr16 | 32596055 32596450 + | 0        | 0        | 0        |
| LTR           | MaLR          | MTA_Mm   | chr16 | 32597542 32597937 + | 0        | 0        | 0        |
| Simple_repeat | Simple_repeat | (A)n     | chr16 | 32687873 32687904 + | 0        | 0        | 0        |
| SINE          | B2            | B3       | chr16 | 32687905 32688086 + | 0        | 0        | 0        |
| Simple_repeat | Simple_repeat | (A)n     | chr10 | 77994813 77994833 + | 0        | 0        | 0        |
| Simple_repeat | Simple_repeat | (A)n     | chr16 | 33142032 33142096 + | 0        | 0        | 0        |
| LTR           | MaLR          | MTA_Mm   | chr16 | 33156072 33156463 - | 0        | 0        | 0        |
| SINE          | Alu           | B1_Mm    | chr16 | 33166622 33166766 + | 0        | 0        | 0        |
| Simple_repeat | Simple_repeat | (A)n     | chr16 | 33166767 33166793 + | 0        | 0        | 0        |
| SINE          | Alu           | B1_Mus2  | chr16 | 33348726 33348872 - | 0        | 0.708814 | 0        |
| LINE          | L1            | L1Md_F2  | chr10 | 78099785 78106008 - | 0        | 0        | 0        |
| SINE          | Alu           | B1_Mm    | chr16 | 33825027 33825173 + | 0        | 0        | 0        |
| Simple_repeat | Simple_repeat | (A)n     | chr16 | 33825174 33825196 + | 0        | 0        | 0        |
| LTR           | MaLR          | MTA_Mm   | chr16 | 34626440 34626836 + | 0        | 0        | 0        |
| Simple_repeat | Simple_repeat | (A)n     | chr16 | 34641967 34642025 + | 0        | 0        | 0        |
| Simple_repeat | Simple_repeat | (T)n     | chr16 | 36096166 36096185 + | 0        | 0        | 0        |
| SINE          | Alu           | B1_Mm    | chr16 | 36114423 36114569 - | 0        | 0        | 0        |

|                |                |         |       |                     |          |          |          |
|----------------|----------------|---------|-------|---------------------|----------|----------|----------|
| SINE           | Alu            | B1_Mus1 | chr16 | 36192594 36192740 - | 0        | 0        | 0        |
| LINE           | L1             | L1VL4   | chr16 | 36574461 36577650 - | 0        | 0        | 0        |
| Simple_repeat  | Simple_repeat  | (A)n    | chr16 | 37635667 37635706 + | 0        | 0        | 0        |
| SINE           | Alu            | B1_Mus2 | chr16 | 38296354 38296498 + | 0        | 0        | 0        |
| SINE           | Alu            | B1_Mus2 | chr16 | 38436732 38436880 - | 0        | 0        | 0        |
| SINE           | Alu            | B1_Mm   | chr16 | 38557824 38557945 + | 0        | 0        | 0        |
| Simple_repeat  | Simple_repeat  | (A)n    | chr16 | 38557946 38557969 + | 0        | 0        | 0        |
| LINE           | L1             | L1VL4   | chr16 | 38734842 38739732 - | 0        | 0        | 0        |
| SINE           | Alu            | B1_Mus1 | chr16 | 39033036 39033179 - | 0        | 0        | 0        |
| Simple_repeat  | Simple_repeat  | (A)n    | chr16 | 39882022 39882085 + | 0        | 0        | 0        |
| SINE           | Alu            | B1_Mm   | chr16 | 40461025 40461171 + | 7.75265  | 6.0891   | 5.88752  |
| Simple_repeat  | Simple_repeat  | (A)n    | chr16 | 40461172 40461209 + | 7.32516  | 7.17848  | 5.68474  |
| LINE           | L1             | L1Md_T  | chr16 | 40660159 40666852 - | 0        | 0        | 0        |
| Simple_repeat  | Simple_repeat  | (A)n    | chr16 | 40765710 40765750 + | 2.34225  | 0.380568 | 2.87384  |
| SINE           | Alu            | B1_Mus1 | chr16 | 40779703 40779849 + | 1.64268  | 0        | 0.615324 |
| Simple_repeat  | Simple_repeat  | (A)n    | chr16 | 40779850 40779898 + | 1.97487  | 0.380568 | 0        |
| SINE           | Alu            | B1_Mm   | chr16 | 40788581 40788731 + | 1.84649  | 0.380568 | 0.615324 |
| Simple_repeat  | Simple_repeat  | (A)n    | chr16 | 40788732 40788757 + | 1.5143   | 1.08938  | 0.957947 |
| LTR            | MaLR           | MTA_Mm  | chr16 | 40950225 40950623 + | 1.18211  | 0.380568 | 0        |
| Simple_repeat  | Simple_repeat  | (A)n    | chr16 | 40980920 40980958 + | 5.85339  | 0        | 1.57327  |
| Simple_repeat  | Simple_repeat  | (A)n    | chr16 | 41136291 41136331 + | 3.98493  | 3.52684  | 0.615324 |
| Simple_repeat  | Simple_repeat  | (A)n    | chr16 | 41253870 41253902 + | 4.20861  | 2.12644  | 7.18586  |
| Simple_repeat  | Simple_repeat  | (A)n    | chr16 | 42235820 42235848 + | 0        | 0        | 0        |
| SINE           | Alu            | B1_Mm   | chr16 | 44345287 44345433 - | 0        | 0        | 0        |
| LTR            | MaLR           | MTA_Mm  | chr16 | 45006088 45006469 + | 0        | 0        | 0        |
| Simple_repeat  | Simple_repeat  | (A)n    | chr16 | 45046752 45046781 + | 0        | 0        | 0        |
| SINE           | Alu            | PB1D9   | chr16 | 45710508 45710627 - | 1.18211  | 0.708814 | 1.23065  |
| SINE           | Alu            | B1_Mus2 | chr10 | 10831361 10831505 + | 0        | 0        | 0        |
| Simple_repeat  | Simple_repeat  | (A)n    | chr16 | 46280706 46280754 + | 0        | 0        | 0        |
| Simple_repeat  | Simple_repeat  | (A)n    | chr16 | 46514674 46514720 + | 0        | 0        | 0        |
| LTR            | MaLR           | MTA_Mm  | chr16 | 47099149 47099544 + | 0        | 0        | 0        |
| LTR            | MaLR           | MTA_Mm  | chr16 | 47100637 47101032 + | 0.591053 | 0        | 0        |
| Simple_repeat  | Simple_repeat  | (A)n    | chr16 | 47102003 47102031 + | 0        | 0        | 0        |
| LTR            | MaLR           | MTA_Mm  | chr16 | 47270600 47270995 + | 0        | 0        | 0        |
| SINE           | Alu            | B1_Mus2 | chr16 | 47782367 47782502 + | 0        | 0        | 0        |
| Simple_repeat  | Simple_repeat  | (A)n    | chr16 | 47782503 47782525 + | 0        | 0        | 0        |
| SINE           | Alu            | B1_Mus2 | chr16 | 48058707 48058855 - | 0        | 0        | 0        |
| SINE           | Alu            | B1_Mus1 | chr16 | 48181940 48182093 + | 0        | 0        | 0        |
| Simple_repeat  | Simple_repeat  | (A)n    | chr16 | 48304219 48304254 + | 0        | 0        | 0        |
| LTR            | MaLR           | MTA_Mm  | chr16 | 48391230 48391625 - | 0        | 0        | 0        |
| SINE           | Alu            | B1_Mus1 | chr16 | 48665677 48665824 + | 0        | 0        | 0        |
| Simple_repeat  | Simple_repeat  | (A)n    | chr16 | 48665825 48665868 + | 0        | 0        | 0        |
| Simple_repeat  | Simple_repeat  | (A)n    | chr16 | 48816786 48816821 + | 0        | 0        | 0        |
| SINE           | Alu            | B1_Mus2 | chr16 | 48822778 48822924 - | 0.923247 | 0.708814 | 0        |
| Simple_repeat  | Simple_repeat  | (A)n    | chr16 | 48862503 48862547 + | 0        | 0        | 0        |
| SINE           | Alu            | B1_Mm   | chr16 | 48900963 48901109 + | 0        | 0        | 0        |
| SINE           | Alu            | B1_Mus2 | chr10 | 79626268 79626417 + | 0        | 0        | 0        |
| Simple_repeat  | Simple_repeat  | (A)n    | chr10 | 79626418 79626446 + | 0        | 0        | 0        |
| Simple_repeat  | Simple_repeat  | (A)n    | chr16 | 49227237 49227259 + | 0        | 0        | 0        |
| LTR            | MaLR           | MTA_Mm  | chr16 | 49323930 49324308 - | 0        | 0        | 0        |
| SINE           | B2             | B2_Mm1a | chr10 | 79674245 79674436 + | 0        | 0        | 0        |
| SINE           | Alu            | B1_Mus1 | chr10 | 79783710 79783851 + | 0        | 0        | 0        |
| Simple_repeat  | Simple_repeat  | (A)n    | chr10 | 79783852 79783874 + | 0        | 0        | 0        |
| Simple_repeat  | Simple_repeat  | (A)n    | chr16 | 51207955 51207997 + | 0.332194 | 0        | 0        |
| LINE           | L1             | L1Md_F2 | chr16 | 51235920 51241841 - | 0        | 0        | 0        |
| SINE           | Alu            | B1_Mm   | chr16 | 51588031 51588172 - | 0        | 0        | 0        |
| LTR            | MaLR           | MTA_Mm  | chr16 | 51834667 51835062 + | 0.332194 | 0        | 0        |
| SINE           | Alu            | B1_Mm   | chr10 | 79906684 79906830 - | 0        | 0        | 0        |
| Simple_repeat  | Simple_repeat  | (A)n    | chr16 | 53153637 53153665 + | 6.22949  | 8.29006  | 14.1657  |
| SINE           | B2             | B2_Mm1t | chr16 | 53271536 53271727 + | 0        | 0        | 0        |
| Low_complexity | Low_complexity | A-rich  | chr16 | 53271728 53271810 + | 0        | 0        | 0        |
| Simple_repeat  | Simple_repeat  | (A)n    | chr16 | 53601351 53601439 + | 0        | 0        | 0        |
| Simple_repeat  | Simple_repeat  | (A)n    | chr16 | 53858837 53858878 + | 0        | 0        | 0.342623 |
| Simple_repeat  | Simple_repeat  | (A)n    | chr16 | 53913303 53913329 + | 0        | 0        | 0        |
| SINE           | Alu            | B1_Mm   | chr16 | 53929746 53929898 + | 0        | 0        | 0        |
| Simple_repeat  | Simple_repeat  | (A)n    | chr16 | 54108342 54108383 + | 0        | 0        | 0        |
| Simple_repeat  | Simple_repeat  | (A)n    | chr16 | 54724747 54724782 + | 0        | 0        | 0        |

|               |               |         |       |                     |          |          |          |
|---------------|---------------|---------|-------|---------------------|----------|----------|----------|
| LTR           | MaLR          | MTA_Mm  | chr16 | 54935952 54936267 + | 0        | 0        | 0        |
| LTR           | MaLR          | MTA_Mm  | chr16 | 55217169 55217569 + | 0        | 0        | 0        |
| SINE          | Alu           | B1_Mus2 | chr10 | 80045747 80045883 + | 0        | 0        | 0        |
| SINE          | Alu           | B1_Mus1 | chr16 | 55757854 55758013 - | 0        | 0        | 0        |
| SINE          | Alu           | B1_Mus2 | chr16 | 55899587 55899738 - | 0        | 0        | 0        |
| SINE          | Alu           | PB1D9   | chr16 | 56057240 56057312 + | 0        | 0        | 0        |
| SINE          | B2            | B2_Mm1a | chr10 | 80124687 80124879 + | 0        | 0        | 0        |
| LINE          | L1            | L1_Mus2 | chr16 | 56959159 56965602 + | 0        | 0        | 0        |
| Simple_repeat | Simple_repeat | (A)n    | chr16 | 57890992 57891019 + | 0        | 0        | 0        |
| SINE          | Alu           | B1_Mus1 | chr16 | 59092679 59092830 + | 0        | 0        | 0        |
| SINE          | Alu           | B1_Mus1 | chr10 | 80387272 80387402 - | 0        | 0        | 0        |
| SINE          | Alu           | B1_Mm   | chr16 | 60965637 60965783 - | 0        | 0        | 0        |
| SINE          | Alu           | B1_Mus2 | chr16 | 61059989 61060137 - | 0        | 0        | 0        |
| LINE          | L1            | L1Md_F2 | chr16 | 61304654 61310539 - | 0        | 0        | 0        |
| SINE          | Alu           | B1_Mus1 | chr16 | 61398582 61398726 - | 0        | 0        | 0        |
| Simple_repeat | Simple_repeat | (A)n    | chr16 | 61487811 61487861 + | 0        | 0        | 0        |
| Simple_repeat | Simple_repeat | (A)n    | chr16 | 61967774 61967802 + | 0        | 0        | 0        |
| LTR           | MaLR          | MTA_Mm  | chr16 | 62930284 62930677 - | 0        | 0        | 0        |
| LTR           | MaLR          | MTB_Mm  | chr16 | 63202862 63203284 + | 0        | 0        | 0        |
| LINE          | L1            | L1Md_T  | chr16 | 63257508 63263145 - | 0        | 0        | 0        |
| Simple_repeat | Simple_repeat | (A)n    | chr16 | 63903888 63903938 + | 0        | 0        | 0        |
| SINE          | Alu           | B1_Mus1 | chr10 | 80638365 80638506 - | 0        | 0        | 0        |
| LTR           | MaLR          | MTA_Mm  | chr16 | 64283878 64284273 + | 0        | 0        | 0        |
| SINE          | Alu           | B1_Mus2 | chr16 | 64846771 64846917 + | 0        | 0        | 0        |
| Simple_repeat | Simple_repeat | (A)n    | chr16 | 64846918 64846942 + | 0        | 0        | 0        |
| SINE          | Alu           | B1F2    | chr10 | 80719791 80719921 - | 0        | 0        | 0        |
| LINE          | L1            | L1Md_T  | chr16 | 65745404 65751850 - | 0        | 0        | 0        |
| SINE          | Alu           | B1_Mus2 | chr16 | 66045842 66045992 - | 0        | 0        | 0        |
| SINE          | Alu           | B1_Mur2 | chr16 | 66046004 66046142 - | 0        | 0        | 0        |
| Simple_repeat | Simple_repeat | (A)n    | chr16 | 66229406 66229445 + | 0        | 0        | 0        |
| Simple_repeat | Simple_repeat | (A)n    | chr16 | 66280129 66280154 + | 0        | 0        | 0        |
| LINE          | L1            | L1Md_T  | chr16 | 66518330 66523846 - | 0.332194 | 1.08938  | 0.342623 |
| SINE          | B2            | B2_Mm1a | chr16 | 66523847 66524033 - | 0.332194 | 0.380568 | 0.342623 |
| Simple_repeat | Simple_repeat | (A)n    | chr16 | 67629545 67629581 + | 0        | 0        | 0        |
| Simple_repeat | Simple_repeat | (A)n    | chr16 | 67652636 67652698 + | 0        | 0        | 0        |
| SINE          | Alu           | B1_Mus1 | chr16 | 68173995 68174140 - | 0        | 0        | 0        |
| SINE          | Alu           | B1_Mus2 | chr16 | 68374729 68374874 - | 0        | 0        | 0        |
| Simple_repeat | Simple_repeat | (A)n    | chr16 | 68510223 68510267 + | 0        | 0        | 0        |
| LINE          | L1            | L1Md_F3 | chr16 | 68669512 68675713 - | 0        | 0        | 0        |
| Simple_repeat | Simple_repeat | (A)n    | chr16 | 68777967 68778000 + | 0        | 0.380568 | 0        |
| Simple_repeat | Simple_repeat | (A)n    | chr16 | 68957962 68958009 + | 0        | 0        | 0        |
| LTR           | MaLR          | MTA_Mm  | chr16 | 69315600 69315995 - | 0.591053 | 0.708814 | 0        |
| SINE          | Alu           | B1_Mus1 | chr16 | 69360343 69360461 + | 0        | 0        | 0        |
| Simple_repeat | Simple_repeat | (A)n    | chr16 | 69360462 69360520 + | 0        | 0.380568 | 0.615324 |
| Simple_repeat | Simple_repeat | (A)n    | chr16 | 69548646 69548673 + | 0        | 0        | 0        |
| Simple_repeat | Simple_repeat | (A)n    | chr16 | 69600051 69600090 + | 0        | 0        | 0        |
| Simple_repeat | Simple_repeat | (A)n    | chr16 | 70019154 70019208 + | 0        | 0        | 0        |
| Simple_repeat | Simple_repeat | (A)n    | chr16 | 70165944 70165973 + | 0        | 0        | 0        |
| SINE          | Alu           | B1_Mus1 | chr10 | 81153037 81153184 - | 0        | 0        | 0        |
| LINE          | L1            | L1Md_A  | chr16 | 71147905 71154513 - | 0        | 0        | 0        |
| LTR           | MaLR          | MTA_Mm  | chr10 | 81187355 81187750 - | 0        | 0.380568 | 0        |
| SINE          | Alu           | B1_Mm   | chr10 | 81241637 81241786 + | 0        | 0        | 0        |
| LINE          | L1            | L1Md_F2 | chr16 | 72012597 72018594 - | 0        | 0        | 0        |
| Simple_repeat | Simple_repeat | (A)n    | chr10 | 81241787 81241822 + | 0        | 0        | 0        |
| SINE          | Alu           | B1_Mm   | chr16 | 72114204 72114349 - | 0        | 0        | 0        |
| SINE          | Alu           | B1_Mus1 | chr10 | 81312132 81312279 - | 0        | 0        | 0        |
| SINE          | Alu           | B1_Mus2 | chr16 | 73255135 73255283 - | 0        | 0        | 0        |
| LTR           | MaLR          | MTA_Mm  | chr10 | 81346447 81346842 - | 0        | 0.380568 | 0        |
| SINE          | Alu           | B1_Mm   | chr16 | 73701525 73701670 + | 0        | 0        | 0        |
| SINE          | Alu           | B1_Mm   | chr10 | 81400978 81401127 + | 0        | 0        | 0        |
| Simple_repeat | Simple_repeat | (A)n    | chr10 | 81401128 81401169 + | 0        | 0        | 0        |
| SINE          | Alu           | B1_Mm   | chr10 | 81464491 81464636 - | 0        | 0        | 0        |
| LTR           | MaLR          | MTB     | chr16 | 75000744 75001127 + | 0        | 0        | 0        |
| LTR           | MaLR          | MTA_Mm  | chr10 | 81479976 81480370 - | 0        | 0        | 0.615324 |
| SINE          | Alu           | B1_Mus2 | chr16 | 75223637 75223782 - | 1.84649  | 1.46995  | 1.23065  |
| Simple_repeat | Simple_repeat | (A)n    | chr16 | 75272037 75272075 + | 0        | 0        | 0        |
| Simple_repeat | Simple_repeat | (A)n    | chr16 | 76054821 76054857 + | 0        | 0        | 0        |

|                |                |         |       |                     |          |          |          |
|----------------|----------------|---------|-------|---------------------|----------|----------|----------|
| SINE           | Alu            | B1_Mus2 | chr16 | 76278117 76278263 + | 0        | 0        | 0        |
| Simple_repeat  | Simple_repeat  | (A)n    | chr16 | 76278264 76278303 + | 0        | 0        | 0        |
| Simple_repeat  | Simple_repeat  | (A)n    | chr16 | 76692842 76692871 + | 0        | 0        | 0.615324 |
| Simple_repeat  | Simple_repeat  | (A)n    | chr16 | 78197632 78197674 + | 0        | 0        | 0        |
| SINE           | Alu            | B1_Mus2 | chr10 | 81743628 81743774 - | 0        | 0        | 0        |
| LTR            | MaLR           | MTA_Mm  | chr16 | 78517945 78518342 + | 0        | 0        | 0        |
| Simple_repeat  | Simple_repeat  | (A)n    | chr16 | 78651066 78651103 + | 0        | 0        | 0        |
| SINE           | Alu            | B1_Mus1 | chr16 | 78749964 78750111 - | 0        | 0        | 0        |
| Simple_repeat  | Simple_repeat  | (A)n    | chr16 | 79494828 79494875 + | 0        | 0        | 0        |
| LINE           | L1             | L1Md_F2 | chr16 | 79510837 79516583 - | 0        | 0        | 0        |
| LTR            | MaLR           | MTA_Mm  | chr16 | 79529312 79529716 - | 0        | 0        | 0        |
| Simple_repeat  | Simple_repeat  | (A)n    | chr16 | 79741577 79741627 + | 0        | 0        | 0        |
| Simple_repeat  | Simple_repeat  | (A)n    | chr16 | 80895679 80895704 + | 0        | 0        | 0        |
| LINE           | L1             | L1Md_T  | chr16 | 81029627 81036581 - | 0        | 0        | 0        |
| Simple_repeat  | Simple_repeat  | (A)n    | chr16 | 81180253 81180294 + | 0        | 0        | 0        |
| SINE           | Alu            | B1_Mm   | chr16 | 82101837 82101979 + | 0        | 0        | 0        |
| Simple_repeat  | Simple_repeat  | (A)n    | chr16 | 82101980 82102010 + | 0        | 0        | 0        |
| SINE           | Alu            | B1_Mm   | chr16 | 83424062 83424208 - | 0        | 0        | 0        |
| LTR            | MaLR           | MTA_Mm  | chr16 | 83493148 83493542 + | 0        | 0        | 0        |
| SINE           | Alu            | B1_Mus1 | chr16 | 83657045 83657197 - | 0        | 0        | 0        |
| SINE           | Alu            | B1_Mm   | chr16 | 83661650 83661796 - | 0        | 0        | 0        |
| LTR            | MaLR           | MTA_Mm  | chr16 | 84085084 84085479 - | 0        | 0        | 0        |
| Simple_repeat  | Simple_repeat  | (A)n    | chr16 | 84529775 84529801 + | 0        | 0        | 0        |
| Simple_repeat  | Simple_repeat  | (TTTA)n | chr10 | 82293547 82293582 + | 0.591053 | 0        | 0        |
| LTR            | MaLR           | MTA_Mm  | chr16 | 84764878 84765271 + | 0        | 0        | 0        |
| SINE           | B2             | B2_Mm1a | chr16 | 84882440 84882631 - | 0        | 0        | 0.342623 |
| SINE           | Alu            | B1_Mus1 | chr16 | 85214137 85214284 + | 0        | 0        | 0        |
| Low_complexity | Low_complexity | A-rich  | chr16 | 85214297 85214404 + | 0        | 0        | 0        |
| Simple_repeat  | Simple_repeat  | (A)n    | chr16 | 85804206 85804233 + | 0        | 0        | 0        |
| LTR            | MaLR           | MTA_Mm  | chr16 | 85829364 85829758 - | 0        | 0        | 0        |
| SINE           | Alu            | B1_Mus2 | chr16 | 86157329 86157475 + | 0        | 0        | 0        |
| Simple_repeat  | Simple_repeat  | (A)n    | chr16 | 86157476 86157498 + | 0        | 0        | 0        |
| LINE           | L1             | L1_Mus4 | chr10 | 11237726 11243407 - | 0        | 0        | 0        |
| Simple_repeat  | Simple_repeat  | (A)n    | chr16 | 87213890 87213919 + | 0        | 0        | 0        |
| SINE           | Alu            | B1_Mm   | chr16 | 87674561 87674707 - | 0        | 0        | 0        |
| SINE           | Alu            | B1_Mus2 | chr16 | 87687401 87687545 + | 0        | 0        | 0        |
| Simple_repeat  | Simple_repeat  | (A)n    | chr16 | 87687546 87687572 + | 0        | 0        | 0        |
| LINE           | L1             | L1Md_F2 | chr16 | 88658617 88665017 - | 0        | 0        | 0        |
| LTR            | MaLR           | MTA_Mm  | chr16 | 89232428 89232824 - | 0        | 0        | 0        |
| LTR            | MaLR           | MTA_Mm  | chr16 | 89453924 89454318 - | 0        | 0        | 0        |
| Simple_repeat  | Simple_repeat  | (A)n    | chr16 | 89542494 89542538 + | 0        | 0        | 0        |
| Simple_repeat  | Simple_repeat  | (A)n    | chr16 | 89675110 89675136 + | 0        | 0        | 0        |
| Simple_repeat  | Simple_repeat  | (A)n    | chr16 | 90504652 90504685 + | 0.591053 | 0        | 0        |
| LTR            | MaLR           | MTA_Mm  | chr16 | 90668054 90668460 + | 0        | 0        | 0.615324 |
| Simple_repeat  | Simple_repeat  | (A)n    | chr16 | 91097405 91097440 + | 0        | 0        | 0        |
| SINE           | Alu            | B1_Mus2 | chr10 | 82801210 82801356 - | 0        | 0        | 0        |
| SINE           | B2             | B3      | chr16 | 91311376 91311559 - | 0        | 0        | 0        |
| SINE           | Alu            | B1_Mus2 | chr10 | 82818299 82818444 + | 0        | 0        | 0        |
| Simple_repeat  | Simple_repeat  | (A)n    | chr10 | 82818445 82818481 + | 0        | 0        | 0        |
| Simple_repeat  | Simple_repeat  | (A)n    | chr16 | 91978355 91978391 + | 0        | 0        | 0        |
| SINE           | Alu            | B1_Mus1 | chr16 | 92572276 92572405 - | 0        | 0        | 0        |
| Simple_repeat  | Simple_repeat  | (A)n    | chr10 | 11330238 11330281 + | 1.58764  | 0.380568 | 1.84597  |
| LINE           | L1             | L1Md_F3 | chr16 | 93617191 93622227 + | 0.923247 | 1.41763  | 0        |
| LTR            | MaLR           | MTA_Mm  | chr16 | 93673360 93673755 + | 0        | 0        | 0        |
| Simple_repeat  | Simple_repeat  | (A)n    | chr16 | 94512622 94512656 + | 0        | 0        | 0        |
| LTR            | MaLR           | MTA_Mm  | chr16 | 94573110 94573504 + | 0        | 0        | 0        |
| SINE           | Alu            | B1_Mm   | chr16 | 95830797 95830937 - | 0        | 0        | 0        |
| SINE           | Alu            | B1_Mus1 | chr16 | 96031795 96031942 + | 0        | 0        | 0        |
| Simple_repeat  | Simple_repeat  | (A)n    | chr16 | 96031943 96031977 + | 0        | 0        | 0        |
| SINE           | Alu            | B1_Mus2 | chr16 | 96172914 96173058 + | 0        | 0        | 0        |
| Simple_repeat  | Simple_repeat  | (A)n    | chr16 | 96173059 96173084 + | 0        | 0        | 0        |
| SINE           | Alu            | B1_Mus2 | chr16 | 96324471 96324617 - | 0        | 0        | 0        |
| Simple_repeat  | Simple_repeat  | (A)n    | chr16 | 97422049 97422089 + | 0        | 0        | 0        |
| SINE           | Alu            | B1_Mus1 | chr16 | 97484485 97484632 + | 0        | 0        | 0        |
| Simple_repeat  | Simple_repeat  | (A)n    | chr16 | 97484633 97484660 + | 0        | 0        | 0.342623 |
| SINE           | Alu            | B1_Mus1 | chr16 | 98274037 98274177 + | 0        | 0        | 0        |
| Simple_repeat  | Simple_repeat  | (A)n    | chr16 | 98274178 98274199 + | 0        | 0        | 0        |

|                |                |         |       |          |          |   |          |          |          |
|----------------|----------------|---------|-------|----------|----------|---|----------|----------|----------|
| SINE           | Alu            | B1_Mus2 | chr17 | 3089203  | 3089349  | - | 0        | 0        | 0        |
| LTR            | MaLR           | MTA_Mm  | chr10 | 83520503 | 83520897 | + | 0        | 0        | 0        |
| Simple_repeat  | Simple_repeat  | (A)n    | chr17 | 4106198  | 4106234  | + | 0        | 0        | 0        |
| SINE           | Alu            | B1_Mus2 | chr17 | 4709991  | 4710136  | + | 0        | 0        | 0        |
| Simple_repeat  | Simple_repeat  | (A)n    | chr17 | 4710137  | 4710186  | + | 0        | 0.380568 | 0        |
| Simple_repeat  | Simple_repeat  | (A)n    | chr17 | 4962042  | 4962078  | + | 0        | 0        | 0        |
| SINE           | Alu            | B1_Mm   | chr17 | 4983240  | 4983380  | + | 0        | 0        | 0        |
| Simple_repeat  | Simple_repeat  | (A)n    | chr17 | 4983381  | 4983421  | + | 0        | 0        | 0        |
| SINE           | Alu            | B1_Mus2 | chr17 | 6354163  | 6354310  | - | 0.664388 | 0        | 0.342623 |
| Simple_repeat  | Simple_repeat  | (A)n    | chr17 | 6461288  | 6461326  | + | 0        | 0        | 0        |
| SINE           | Alu            | B1_Mm   | chr17 | 6494237  | 6494383  | - | 0        | 0        | 0        |
| SINE           | Alu            | B1_Mus1 | chr17 | 6539963  | 6540111  | - | 0        | 0        | 0        |
| SINE           | Alu            | B1_Mus1 | chr17 | 7049637  | 7049784  | - | 0        | 0        | 0        |
| SINE           | Alu            | B1_Mus2 | chr17 | 7640719  | 7640864  | + | 0        | 0        | 0        |
| Simple_repeat  | Simple_repeat  | (A)n    | chr17 | 7640865  | 7640887  | + | 0        | 0        | 0        |
| SINE           | Alu            | B1_Mus2 | chr17 | 7721554  | 7721699  | + | 0        | 0        | 0        |
| Simple_repeat  | Simple_repeat  | (A)n    | chr17 | 7721700  | 7721740  | + | 0        | 0        | 0        |
| SINE           | Alu            | B1_Mus1 | chr17 | 7884446  | 7884592  | + | 0        | 0        | 0        |
| SINE           | Alu            | B1_Mus1 | chr17 | 8351392  | 8351538  | + | 0        | 0        | 0        |
| Simple_repeat  | Simple_repeat  | (A)n    | chr17 | 8351539  | 8351569  | + | 0        | 0        | 0        |
| Simple_repeat  | Simple_repeat  | (A)n    | chr17 | 8944414  | 8944450  | + | 0        | 0        | 0        |
| SINE           | Alu            | B1_Mm   | chr17 | 10552820 | 10552966 | - | 0        | 0        | 0        |
| SINE           | Alu            | B1_Mus2 | chr17 | 12826580 | 12826708 | - | 0        | 0        | 0        |
| LTR            | MaLR           | MTA_Mm  | chr17 | 13504469 | 13504860 | - | 0        | 0        | 0        |
| SINE           | Alu            | B1_Mus1 | chr17 | 13750221 | 13750339 | - | 0        | 0        | 0        |
| Simple_repeat  | Simple_repeat  | (A)n    | chr17 | 14172212 | 14172241 | + | 0        | 0        | 0        |
| SINE           | Alu            | B1_Mus2 | chr17 | 15244781 | 15244927 | + | 0        | 0        | 0        |
| Simple_repeat  | Simple_repeat  | (A)n    | chr17 | 15244928 | 15244951 | + | 0        | 0        | 0        |
| SINE           | Alu            | B1_Mus2 | chr17 | 15277236 | 15277380 | + | 0        | 0        | 0        |
| Simple_repeat  | Simple_repeat  | (A)n    | chr17 | 15277381 | 15277420 | + | 0        | 0        | 0.342623 |
| LTR            | MaLR           | MTA_Mm  | chr17 | 16124234 | 16124628 | + | 0        | 0        | 0        |
| LTR            | MaLR           | MTA_Mm  | chr17 | 16246961 | 16247357 | - | 0        | 0        | 0        |
| Simple_repeat  | Simple_repeat  | (A)n    | chr17 | 16380048 | 16380082 | + | 0        | 0        | 0        |
| Simple_repeat  | Simple_repeat  | (A)n    | chr17 | 16754679 | 16754706 | + | 0        | 0        | 0        |
| SINE           | Alu            | B1_Mus2 | chr17 | 17086791 | 17086937 | - | 0        | 0        | 0        |
| SINE           | Alu            | B1_Mus2 | chr17 | 17483557 | 17483700 | + | 0        | 0        | 0.615324 |
| LTR            | MaLR           | MTB     | chr17 | 17493623 | 17494023 | - | 0        | 0        | 0        |
| Simple_repeat  | Simple_repeat  | (A)n    | chr17 | 17504220 | 17504244 | + | 1.18211  | 0        | 0        |
| SINE           | B2             | B2_Mm2  | chr17 | 17616062 | 17616250 | - | 0        | 0        | 0        |
| SINE           | Alu            | B1_Mm   | chr17 | 18037257 | 18037401 | + | 0        | 0        | 0        |
| Simple_repeat  | Simple_repeat  | (A)n    | chr17 | 18037402 | 18037431 | + | 0        | 0        | 0        |
| LTR            | MaLR           | MTA_Mm  | chr17 | 18334696 | 18335084 | - | 0        | 0        | 0        |
| SINE           | Alu            | B1_Mus1 | chr17 | 18468903 | 18469052 | + | 0        | 0        | 0        |
| Low_complexity | Low_complexity | A-rich  | chr17 | 18469053 | 18469158 | + | 0        | 0        | 0.342623 |
| LINE           | L1             | L1Md_F2 | chr17 | 18482792 | 18488033 | + | 0        | 0        | 0        |
| SINE           | Alu            | B1_Mm   | chr17 | 18505707 | 18505853 | - | 0        | 0        | 0        |
| SINE           | Alu            | B1_Mus1 | chr17 | 18535278 | 18535425 | - | 0        | 0        | 0        |
| LTR            | MaLR           | MTA_Mm  | chr17 | 18780391 | 18780769 | - | 0        | 0        | 0        |
| Low_complexity | Low_complexity | A-rich  | chr17 | 19669523 | 19669690 | + | 0        | 0        | 0        |
| Simple_repeat  | Simple_repeat  | (A)n    | chr17 | 20054632 | 20054687 | + | 0        | 0        | 0        |
| LINE           | L1             | L1Md_F2 | chr17 | 20424258 | 20430476 | - | 0        | 0        | 0        |
| SINE           | Alu            | B1_Mus2 | chr17 | 20574865 | 20575010 | - | 0        | 0        | 0        |
| SINE           | Alu            | B1_Mm   | chr17 | 20627771 | 20627917 | + | 0        | 0        | 0        |
| Simple_repeat  | Simple_repeat  | (A)n    | chr17 | 20627918 | 20627942 | + | 0.332194 | 0        | 0        |
| Simple_repeat  | Simple_repeat  | (A)n    | chr17 | 20782608 | 20782652 | + | 0        | 0        | 0        |
| LINE           | L1             | L1_Mus2 | chr17 | 21016581 | 21022547 | + | 0        | 0        | 0        |
| LTR            | MaLR           | MTA_Mm  | chr17 | 21037184 | 21037577 | - | 0        | 0        | 0        |
| Simple_repeat  | Simple_repeat  | (A)n    | chr17 | 21108397 | 21108446 | + | 0.923247 | 1.08938  | 0.685246 |
| LTR            | MaLR           | MTA_Mm  | chr17 | 21223768 | 21224159 | - | 0        | 0        | 0        |
| LTR            | MaLR           | MTA_Mm  | chr17 | 21374049 | 21374442 | + | 0        | 0        | 0        |
| SINE           | Alu            | B1_Mm   | chr17 | 21725912 | 21726022 | + | 0        | 0        | 0        |
| Simple_repeat  | Simple_repeat  | (A)n    | chr17 | 21726023 | 21726047 | + | 0        | 0        | 0        |
| SINE           | Alu            | B1_Mus1 | chr17 | 21812801 | 21812945 | + | 0        | 0        | 0        |
| Simple_repeat  | Simple_repeat  | (A)n    | chr17 | 21983619 | 21983667 | + | 0        | 0        | 0        |
| SINE           | Alu            | B1_Mm   | chr17 | 22308708 | 22308854 | + | 0        | 0        | 0        |
| SINE           | Alu            | B1_Mus1 | chr17 | 22793320 | 22793464 | + | 0        | 0        | 0        |
| Simple_repeat  | Simple_repeat  | (A)n    | chr17 | 22793465 | 22793511 | + | 0        | 0        | 0        |

|                |                |           |       |                     |          |          |          |
|----------------|----------------|-----------|-------|---------------------|----------|----------|----------|
| Simple_repeat  | Simple_repeat  | (A)n      | chr17 | 23668583 23668617 + | 0        | 0        | 0        |
| Simple_repeat  | Simple_repeat  | (A)n      | chr17 | 23782854 23782897 + | 0        | 0        | 0        |
| Simple_repeat  | Simple_repeat  | (A)n      | chr17 | 23837684 23837713 + | 0.591053 | 0        | 1.23065  |
| SINE           | Alu            | B1_Mm     | chr17 | 24395732 24395875 + | 0        | 0        | 0        |
| Simple_repeat  | Simple_repeat  | (A)n      | chr17 | 24395876 24395902 + | 0        | 0        | 0        |
| SINE           | Alu            | B1_Mus2   | chr10 | 85394623 85394769 + | 0        | 0        | 0        |
| Simple_repeat  | Simple_repeat  | (A)n      | chr10 | 85394770 85394797 + | 0        | 0        | 0        |
| Simple_repeat  | Simple_repeat  | (A)n      | chr17 | 25848550 25848590 + | 0        | 0        | 0        |
| SINE           | Alu            | B1_Mus1   | chr17 | 26108157 26108304 - | 0        | 0        | 0        |
| SINE           | Alu            | B1_Mus2   | chr17 | 26270494 26270632 - | 0        | 0        | 0        |
| LTR            | MaLR           | MTA_Mm    | chr17 | 26385266 26385660 + | 0        | 0        | 0        |
| Simple_repeat  | Simple_repeat  | (A)n      | chr17 | 26697303 26697341 + | 0        | 0        | 0        |
| LTR            | MaLR           | MTA_Mm    | chr17 | 26943872 26944267 + | 0        | 0        | 0        |
| SINE           | Alu            | B1_Mus1   | chr17 | 27040084 27040224 - | 0        | 0        | 0        |
| SINE           | Alu            | B1_Mus1   | chr17 | 27114557 27114705 + | 1.77316  | 0        | 0.615324 |
| SINE           | Alu            | B1_Mus1   | chr17 | 27121671 27121818 + | 2.82479  | 1.08938  | 0.615324 |
| Low_complexity | Low_complexity | A-rich    | chr17 | 27121819 27121875 + | 1.18211  | 1.08938  | 0        |
| Simple_repeat  | Simple_repeat  | (TTTA)n   | chr17 | 27974637 27974660 + | 0        | 0        | 0        |
| SINE           | B2             | B2_Mm1t   | chr17 | 28527787 28527978 - | 1.16015  | 0        | 0        |
| SINE           | Alu            | B1_Mus1   | chr17 | 28528020 28528167 - | 0        | 0        | 0        |
| Simple_repeat  | Simple_repeat  | (A)n      | chr17 | 28648978 28649014 + | 0        | 0        | 0        |
| SINE           | Alu            | B1_Mm     | chr17 | 28678465 28678613 + | 0        | 0        | 0        |
| Simple_repeat  | Simple_repeat  | (A)n      | chr17 | 28678614 28678643 + | 0.664388 | 0        | 0        |
| Simple_repeat  | Simple_repeat  | (A)n      | chr17 | 28700253 28700289 + | 0        | 0        | 0        |
| Simple_repeat  | Simple_repeat  | (A)n      | chr17 | 28726294 28726380 + | 0        | 0        | 0        |
| SINE           | Alu            | B1_Mus1   | chr17 | 29055143 29055288 + | 0        | 0        | 0        |
| LTR            | ERV1           | MURVY-LTR | chr17 | 29055289 29055720 + | 0        | 0        | 0        |
| SINE           | Alu            | B1_Mm     | chr17 | 29261151 29261296 + | 0        | 0        | 0        |
| Simple_repeat  | Simple_repeat  | (A)n      | chr17 | 29261297 29261332 + | 0        | 0        | 0        |
| SINE           | Alu            | B1_Mus2   | chr17 | 29402688 29402836 - | 0        | 0        | 0        |
| SINE           | Alu            | B1_Mus1   | chr17 | 29404263 29404410 - | 0        | 0        | 0        |
| SINE           | Alu            | B1_Mus1   | chr17 | 29454208 29454353 + | 0        | 0        | 0        |
| Simple_repeat  | Simple_repeat  | (A)n      | chr17 | 29454354 29454385 + | 0        | 0        | 0        |
| SINE           | Alu            | B1_Mm     | chr17 | 29591028 29591173 + | 0        | 0        | 0        |
| Simple_repeat  | Simple_repeat  | (A)n      | chr17 | 29591174 29591196 + | 0        | 0        | 0        |
| Simple_repeat  | Simple_repeat  | (A)n      | chr17 | 29622061 29622089 + | 0        | 0        | 0        |
| SINE           | Alu            | B1_Mus2   | chr17 | 29643593 29643739 - | 0        | 0        | 0        |
| SINE           | Alu            | B1_Mus1   | chr17 | 30124209 30124354 + | 0        | 0        | 0        |
| Simple_repeat  | Simple_repeat  | (A)n      | chr17 | 30124355 30124377 + | 0        | 0        | 0.342623 |
| SINE           | Alu            | B1_Mus2   | chr17 | 30137774 30137919 + | 0        | 0        | 0        |
| Simple_repeat  | Simple_repeat  | (A)n      | chr17 | 30137920 30137956 + | 0        | 0        | 0        |
| SINE           | Alu            | B1_Mur1   | chr17 | 30138187 30138324 - | 0        | 0        | 0        |
| LTR            | ERVK           | RMER19B   | chr17 | 31149283 31150195 + | 0        | 0        | 0        |
| SINE           | Alu            | B1_Mm     | chr10 | 11730916 11731053 + | 0        | 0        | 0        |
| Simple_repeat  | Simple_repeat  | (A)n      | chr17 | 31866499 31866539 + | 0        | 0        | 0        |
| Simple_repeat  | Simple_repeat  | (A)n      | chr10 | 11731054 11731110 + | 0        | 0        | 0        |
| SINE           | Alu            | B1_Mm     | chr17 | 32544965 32545111 - | 0        | 0        | 0        |
| Simple_repeat  | Simple_repeat  | (A)n      | chr17 | 32546465 32546502 + | 0        | 0        | 0        |
| Simple_repeat  | Simple_repeat  | (A)n      | chr17 | 32670469 32670496 + | 0        | 0        | 0        |
| SINE           | Alu            | B1_Mus2   | chr17 | 33174369 33174515 + | 0        | 0        | 0        |
| LTR            | MaLR           | MTA_Mm    | chr17 | 33394123 33394503 + | 0        | 0        | 0        |
| LTR            | MaLR           | MTA_Mm    | chr17 | 33424071 33424451 - | 0        | 0        | 0        |
| SINE           | Alu            | B1_Mus1   | chr17 | 34635113 34635257 + | 0        | 0        | 0        |
| Simple_repeat  | Simple_repeat  | (CAAAA)n  | chr17 | 34635260 34635325 + | 0        | 0        | 0        |
| SINE           | Alu            | B1_Mus2   | chr17 | 34916715 34916861 + | 0        | 0        | 0        |
| Simple_repeat  | Simple_repeat  | (A)n      | chr17 | 34916862 34916886 + | 0        | 0        | 0        |
| SINE           | Alu            | B1_Mus1   | chr17 | 35081062 35081207 - | 0        | 0        | 0        |
| SINE           | Alu            | B1_Mus2   | chr17 | 35199156 35199302 - | 0        | 0        | 0        |
| Simple_repeat  | Simple_repeat  | (A)n      | chr10 | 3918711 3918751 +   | 0        | 0        | 0        |
| SINE           | Alu            | B1_Mus1   | chr17 | 35342731 35342879 - | 0        | 0        | 0        |
| Simple_repeat  | Simple_repeat  | (A)n      | chr17 | 35514972 35515005 + | 0        | 0        | 0        |
| SINE           | Alu            | B1_Mus2   | chr17 | 35635555 35635699 + | 0        | 0        | 0        |
| Simple_repeat  | Simple_repeat  | (A)n      | chr17 | 35635700 35635725 + | 0        | 0        | 0        |
| Simple_repeat  | Simple_repeat  | (A)n      | chr10 | 86749472 86749502 + | 0        | 0        | 0        |
| SINE           | Alu            | B1_Mus1   | chr17 | 35750417 35750555 - | 0        | 0        | 0        |
| LTR            | MaLR           | MTA_Mm    | chr17 | 35852525 35852914 + | 0        | 0.761137 | 0        |
| SINE           | Alu            | B1_Mus1   | chr17 | 35951332 35951466 + | 0        | 0        | 0        |

|               |               |         |       |                     |          |          |          |
|---------------|---------------|---------|-------|---------------------|----------|----------|----------|
| Simple_repeat | Simple_repeat | (A)n    | chr17 | 35951467 35951512 + | 0        | 0        | 0        |
| LINE          | L1            | L1Md_F2 | chr17 | 36880706 36886565 + | 0        | 0        | 0        |
| SINE          | Alu           | B1_Mm   | chr17 | 37108817 37108962 + | 0        | 0        | 0        |
| Simple_repeat | Simple_repeat | (A)n    | chr17 | 37108963 37109018 + | 0        | 0        | 0        |
| SINE          | Alu           | B1_Mm   | chr17 | 37163046 37163192 + | 0        | 0        | 0        |
| Simple_repeat | Simple_repeat | (A)n    | chr17 | 37163193 37163219 + | 0        | 0        | 0        |
| Simple_repeat | Simple_repeat | (A)n    | chr17 | 37300596 37300623 + | 0        | 0        | 0        |
| Simple_repeat | Simple_repeat | (A)n    | chr17 | 37503935 37503982 + | 0        | 0        | 0.615324 |
| Simple_repeat | Simple_repeat | (A)n    | chr17 | 37554022 37554056 + | 0        | 0        | 0        |
| SINE          | Alu           | B1_Mus1 | chr17 | 37556619 37556766 + | 0        | 0        | 0        |
| LTR           | MaLR          | MTA_Mm  | chr17 | 38123301 38123684 - | 0        | 0        | 0        |
| SINE          | Alu           | B1_Mus2 | chr17 | 38135577 38135721 - | 0        | 0        | 0        |
| SINE          | Alu           | B1_Mm   | chr17 | 38643454 38643596 + | 0        | 0        | 0        |
| Simple_repeat | Simple_repeat | (A)n    | chr10 | 11826371 11826393 + | 0        | 0        | 0        |
| SINE          | Alu           | B1_Mus1 | chr10 | 3921946 3922090 +   | 0        | 0        | 0        |
| Simple_repeat | Simple_repeat | (A)n    | chr10 | 3922091 3922120 +   | 0        | 0        | 0        |
| LINE          | L1            | L1_Mus1 | chr17 | 40150250 40156284 - | 0        | 0.380568 | 0        |
| SINE          | Alu           | B1_Mus1 | chr10 | 87249970 87250083 + | 0        | 0        | 0        |
| Simple_repeat | Simple_repeat | (A)n    | chr10 | 87250084 87250125 + | 0        | 0        | 0        |
| Simple_repeat | Simple_repeat | (A)n    | chr17 | 40610338 40610415 + | 0        | 0        | 0        |
| Simple_repeat | Simple_repeat | (A)n    | chr17 | 41387614 41387659 + | 0        | 0        | 0.615324 |
| LTR           | MaLR          | MTA_Mm  | chr17 | 41511802 41512203 + | 0        | 0        | 0        |
| LINE          | L1            | L1Md_F2 | chr17 | 41521576 41527076 - | 0        | 0        | 0        |
| LINE          | L1            | L1Md_F3 | chr17 | 41546557 41551765 + | 0        | 0        | 0        |
| SINE          | Alu           | B1_Mus1 | chr17 | 41696276 41696422 + | 0        | 0        | 0        |
| Simple_repeat | Simple_repeat | (A)n    | chr17 | 42035332 42035362 + | 0        | 0        | 0        |
| Simple_repeat | Simple_repeat | (A)n    | chr17 | 42277593 42277623 + | 0        | 0        | 0        |
| Simple_repeat | Simple_repeat | (A)n    | chr17 | 42289867 42289895 + | 0        | 0        | 0        |
| LTR           | MaLR          | MTA_Mm  | chr17 | 42397957 42398350 - | 0        | 0        | 0        |
| SINE          | Alu           | B1_Mm   | chr17 | 42920252 42920398 - | 0        | 0        | 0        |
| SINE          | Alu           | B1_Mus2 | chr17 | 43044631 43044776 - | 0        | 0        | 0        |
| LTR           | MaLR          | MTA_Mm  | chr17 | 45343679 45344060 - | 0        | 0        | 0        |
| SINE          | Alu           | B1_Mus1 | chr17 | 45623493 45623604 + | 0        | 0        | 0        |
| Simple_repeat | Simple_repeat | (GAAA)n | chr17 | 45623605 45623746 + | 0        | 0        | 0        |
| SINE          | Alu           | B1_Mus1 | chr17 | 45713187 45713315 - | 0        | 0        | 0        |
| SINE          | Alu           | B1_Mus2 | chr17 | 46498660 46498808 - | 0        | 0        | 0        |
| SINE          | Alu           | B1_Mus2 | chr17 | 46999538 46999683 - | 2.10535  | 1.08938  | 0        |
| SINE          | Alu           | B1_Mus1 | chr17 | 47243828 47243975 - | 0        | 0        | 0        |
| Simple_repeat | Simple_repeat | (A)n    | chr10 | 87976211 87976238 + | 0        | 0        | 0        |
| Simple_repeat | Simple_repeat | (A)n    | chr10 | 88071859 88071897 + | 0        | 0        | 0        |
| Simple_repeat | Simple_repeat | (A)n    | chr17 | 48243890 48243923 + | 0        | 0        | 0        |
| SINE          | Alu           | B1_Mus1 | chr17 | 48475636 48475781 + | 0        | 0        | 0        |
| Simple_repeat | Simple_repeat | (A)n    | chr17 | 48475782 48475808 + | 0        | 0        | 0        |
| SINE          | Alu           | B1_Mm   | chr10 | 88123731 88123877 - | 0        | 0        | 0        |
| SINE          | Alu           | B1_Mm   | chr10 | 88128170 88128315 + | 0        | 0        | 0        |
| Simple_repeat | Simple_repeat | (A)n    | chr10 | 88128316 88128335 + | 0        | 0        | 0        |
| SINE          | Alu           | B1_Mus2 | chr17 | 49383362 49383508 - | 0        | 0        | 0        |
| Simple_repeat | Simple_repeat | (A)n    | chr17 | 49423217 49423258 + | 0        | 0        | 0        |
| Simple_repeat | Simple_repeat | (A)n    | chr17 | 49423706 49423742 + | 0        | 0        | 0        |
| SINE          | Alu           | B1_Mus1 | chr17 | 51380185 51380330 - | 0        | 0        | 0        |
| Simple_repeat | Simple_repeat | (A)n    | chr17 | 51477181 51477208 + | 0        | 0        | 0        |
| LTR           | MaLR          | MTA_Mm  | chr17 | 51778371 51778766 - | 0        | 0        | 0        |
| LTR           | MaLR          | MTA_Mm  | chr17 | 51779865 51780260 - | 0        | 0        | 0        |
| LTR           | MaLR          | MTA_Mm  | chr17 | 51990508 51990903 + | 0.332194 | 2.12644  | 0.615324 |
| SINE          | Alu           | B1_Mus2 | chr17 | 52003306 52003452 + | 3.10194  | 3.97696  | 3.21646  |
| Simple_repeat | Simple_repeat | (A)n    | chr17 | 52183347 52183379 + | 0        | 0        | 0        |
| SINE          | Alu           | B1_Mm   | chr17 | 52188898 52189044 - | 0        | 0        | 0        |
| SINE          | Alu           | B1_Mus2 | chr17 | 53693077 53693223 + | 0        | 0        | 0        |
| Simple_repeat | Simple_repeat | (A)n    | chr17 | 53693224 53693247 + | 0        | 0        | 0        |
| Simple_repeat | Simple_repeat | (A)n    | chr17 | 53700207 53700276 + | 0.332194 | 0        | 0        |
| SINE          | Alu           | B1_Mm   | chr17 | 54171011 54171157 + | 0        | 0        | 0        |
| Simple_repeat | Simple_repeat | (A)n    | chr17 | 54171158 54171183 + | 0        | 0        | 0        |
| LINE          | L1            | L1_Mus4 | chr17 | 54901791 54906250 - | 0.332194 | 0        | 0        |
| LTR           | MaLR          | MTA_Mm  | chr17 | 54950684 54951077 + | 0        | 0        | 0        |
| LINE          | L1            | Lx      | chr17 | 55722172 55727669 - | 0        | 0        | 0        |
| SINE          | Alu           | B1_Mus2 | chr17 | 56364767 56364913 + | 0        | 0        | 0        |
| Simple_repeat | Simple_repeat | (A)n    | chr17 | 56364914 56364949 + | 0        | 0        | 0        |



|                |                |         |       |                     |          |          |          |
|----------------|----------------|---------|-------|---------------------|----------|----------|----------|
| SINE           | Alu            | B1_Mus2 | chr17 | 56391296 56391441 - | 0        | 0        | 0        |
| SINE           | Alu            | B1_Mm   | chr17 | 56463499 56463646 + | 0        | 0        | 0        |
| Simple_repeat  | Simple_repeat  | (A)n    | chr17 | 56463647 56463674 + | 0        | 0        | 0        |
| SINE           | Alu            | B1_Mus1 | chr17 | 56662694 56662840 + | 0        | 0        | 0        |
| Low_complexity | Low_complexity | A-rich  | chr17 | 56662841 56662896 + | 0        | 0        | 0        |
| SINE           | B2             | B2_Mm2  | chr17 | 56689079 56689272 - | 0        | 0        | 0        |
| SINE           | Alu            | B1_Mm   | chr17 | 56865259 56865405 + | 0        | 0        | 0        |
| Simple_repeat  | Simple_repeat  | (A)n    | chr17 | 56865406 56865428 + | 0        | 0        | 0        |
| Simple_repeat  | Simple_repeat  | (A)n    | chr17 | 56973859 56973891 + | 0        | 0        | 0        |
| Simple_repeat  | Simple_repeat  | (A)n    | chr17 | 57141771 57141792 + | 0        | 0        | 0        |
| LINE           | L1             | L1Md_F2 | chr10 | 12050073 12055123 + | 0        | 0        | 0        |
| SINE           | Alu            | B1_Mus1 | chr17 | 57269747 57269894 + | 0        | 0        | 0        |
| Simple_repeat  | Simple_repeat  | (A)n    | chr17 | 57269895 57269929 + | 0        | 0        | 0        |
| SINE           | Alu            | B1_Mus1 | chr10 | 89000301 89000443 - | 0        | 0        | 0        |
| LTR            | MaLR           | MTA_Mm  | chr17 | 58933115 58933510 + | 0.591053 | 0        | 0.615324 |
| LTR            | MaLR           | MTA_Mm  | chr10 | 89167052 89167447 + | 0        | 0        | 0        |
| SINE           | Alu            | B1_Mus2 | chr17 | 60523656 60523804 - | 0        | 0        | 0        |
| SINE           | Alu            | B1_Mm   | chr17 | 60548977 60549122 + | 0        | 0        | 0        |
| SINE           | Alu            | B1_Mm   | chr10 | 12098767 12098911 - | 0        | 0        | 0        |
| Low_complexity | Low_complexity | A-rich  | chr17 | 61723210 61723271 + | 0        | 0        | 0        |
| SINE           | Alu            | B1_Mm   | chr17 | 61801670 61801808 + | 0        | 0        | 0        |
| Simple_repeat  | Simple_repeat  | (A)n    | chr17 | 61801809 61801831 + | 0        | 0        | 0        |
| SINE           | Alu            | B1_Mus2 | chr17 | 62357571 62357718 - | 0        | 0        | 0        |
| Simple_repeat  | Simple_repeat  | (A)n    | chr17 | 62863329 62863368 + | 0        | 0        | 0        |
| SINE           | Alu            | B1_Mus2 | chr17 | 63896669 63896815 - | 0        | 0        | 0        |
| SINE           | Alu            | B1_Mm   | chr17 | 63997038 63997173 - | 0        | 0        | 0        |
| SINE           | Alu            | B1_Mm   | chr17 | 64083145 64083291 + | 0        | 0        | 0        |
| Simple_repeat  | Simple_repeat  | (A)n    | chr17 | 64083292 64083315 + | 0        | 0        | 0        |
| SINE           | Alu            | B1_Mus2 | chr17 | 64615435 64615581 + | 0        | 0        | 0        |
| Simple_repeat  | Simple_repeat  | (A)n    | chr17 | 64615582 64615607 + | 0        | 0        | 0        |
| SINE           | Alu            | B1_Mus1 | chr17 | 64946205 64946352 + | 0        | 0        | 0        |
| Simple_repeat  | Simple_repeat  | (A)n    | chr17 | 64946353 64946377 + | 0        | 0        | 0        |
| Simple_repeat  | Simple_repeat  | (A)n    | chr17 | 65226967 65227005 + | 0        | 0        | 0        |
| SINE           | B2             | B2_Mm1a | chr17 | 66518990 66519175 + | 0        | 0        | 0        |
| SINE           | Alu            | B1_Mm   | chr17 | 66809630 66809777 - | 0        | 0        | 0        |
| SINE           | Alu            | B1_Mus2 | chr17 | 66831332 66831478 - | 0        | 0        | 0        |
| SINE           | Alu            | B1_Mm   | chr17 | 67735328 67735473 - | 0        | 0        | 0        |
| Simple_repeat  | Simple_repeat  | (A)n    | chr17 | 68526394 68526432 + | 0        | 0        | 0        |
| LTR            | MaLR           | MTA_Mm  | chr17 | 69318725 69319121 - | 0        | 0        | 0        |
| Simple_repeat  | Simple_repeat  | (A)n    | chr17 | 69919837 69919863 + | 3.46721  | 2.98884  | 0        |
| SINE           | Alu            | B1_Mm   | chr17 | 70279777 70279923 + | 0        | 0        | 0        |
| Simple_repeat  | Simple_repeat  | (A)n    | chr17 | 70506604 70506668 + | 1.58764  | 1.41763  | 1.30057  |
| SINE           | Alu            | B1_Mus2 | chr17 | 71190591 71190737 + | 0        | 0        | 0        |
| Simple_repeat  | Simple_repeat  | (A)n    | chr17 | 71190738 71190761 + | 0        | 0        | 0        |
| SINE           | Alu            | B1_Mur2 | chr17 | 71191754 71191861 + | 0        | 0        | 0        |
| Simple_repeat  | Simple_repeat  | (A)n    | chr17 | 71191862 71191887 + | 0        | 0        | 0        |
| SINE           | Alu            | B1_Mus2 | chr17 | 71220491 71220627 - | 0        | 0.380568 | 0        |
| LTR            | MaLR           | MTA_Mm  | chr17 | 74084609 74085004 + | 0        | 0        | 0        |
| Simple_repeat  | Simple_repeat  | (TTTA)n | chr10 | 90448338 90448358 + | 0        | 0        | 0        |
| Simple_repeat  | Simple_repeat  | (A)n    | chr17 | 74484343 74484381 + | 0        | 0        | 0        |
| SINE           | Alu            | B1_Mus2 | chr17 | 74724108 74724254 + | 0        | 0        | 0        |
| Simple_repeat  | Simple_repeat  | (A)n    | chr17 | 74724255 74724293 + | 0        | 0        | 0        |
| Simple_repeat  | Simple_repeat  | (A)n    | chr17 | 74734769 74734797 + | 0        | 0        | 0        |
| Low_complexity | Low_complexity | GA-rich | chr17 | 74885304 74885388 + | 0        | 0        | 0        |
| SINE           | Alu            | B1_Mus2 | chr17 | 74906920 74907065 + | 0        | 0        | 0        |
| Simple_repeat  | Simple_repeat  | (A)n    | chr17 | 74907066 74907107 + | 0        | 0        | 0.342623 |
| Simple_repeat  | Simple_repeat  | (A)n    | chr17 | 75104467 75104511 + | 1.5143   | 0.708814 | 2.06302  |
| SINE           | Alu            | B1_Mus2 | chr17 | 75264868 75264998 - | 0        | 0        | 0        |
| SINE           | Alu            | B1_Mm   | chr17 | 76206011 76206151 - | 0        | 0        | 0        |
| LTR            | MaLR           | MTA_Mm  | chr17 | 76759659 76760050 + | 0        | 0        | 0        |
| SINE           | B4             | B4      | chr17 | 77334637 77334923 + | 0        | 0        | 0        |
| LINE           | L1             | L1Md_F3 | chr17 | 78097627 78102811 + | 0        | 0        | 0        |
| Simple_repeat  | Simple_repeat  | (A)n    | chr17 | 78257725 78257765 + | 0        | 0        | 0        |
| SINE           | Alu            | B1_Mus1 | chr10 | 90837604 90837739 + | 0        | 0        | 0        |
| SINE           | Alu            | B1_Mus2 | chr17 | 80314386 80314529 + | 0        | 0        | 0        |
| SINE           | Alu            | B1_Mur3 | chr17 | 80512062 80512181 - | 0        | 0        | 0        |
| SINE           | Alu            | B1_Mus2 | chr17 | 81133328 81133457 - | 0        | 0        | 0        |

|               |               |           |       |                     |          |          |          |
|---------------|---------------|-----------|-------|---------------------|----------|----------|----------|
| Simple_repeat | Simple_repeat | (A)n      | chr17 | 81247064 81247098 + | 0        | 0        | 0        |
| SINE          | Alu           | B1_Mm     | chr17 | 81693260 81693406 + | 0        | 0        | 0        |
| LTR           | MaLR          | MTA_Mm    | chr17 | 82788378 82788774 - | 0        | 0        | 0        |
| LTR           | MaLR          | MTA_Mm    | chr17 | 82804240 82804633 + | 0.332194 | 0        | 0        |
| Simple_repeat | Simple_repeat | (A)n      | chr17 | 82870098 82870141 + | 0        | 0        | 0        |
| SINE          | Alu           | B1_Mus1   | chr17 | 83632960 83633080 + | 0        | 0        | 0        |
| Simple_repeat | Simple_repeat | (A)n      | chr17 | 83633081 83633131 + | 0        | 0        | 0        |
| SINE          | Alu           | B1_Mm     | chr17 | 83934920 83935068 - | 0        | 0        | 0        |
| Simple_repeat | Simple_repeat | (A)n      | chr17 | 84081195 84081232 + | 0        | 0        | 0        |
| LTR           | MaLR          | MTB       | chr17 | 84084115 84084505 + | 0        | 0        | 0        |
| SINE          | Alu           | B1_Mm     | chr17 | 84100570 84100715 + | 0        | 0        | 0        |
| Simple_repeat | Simple_repeat | (A)n      | chr17 | 84100716 84100764 + | 0        | 0        | 0        |
| Simple_repeat | Simple_repeat | (A)n      | chr10 | 91316842 91316871 + | 0        | 0        | 0.615324 |
| LTR           | MaLR          | MTA_Mm    | chr17 | 84567201 84567597 + | 0        | 0        | 0        |
| Simple_repeat | Simple_repeat | (A)n      | chr17 | 84582280 84582311 + | 0        | 0        | 0        |
| SINE          | Alu           | B1_Mus1   | chr10 | 91427990 91428134 - | 0        | 0        | 0        |
| SINE          | Alu           | B1_Mus1   | chr17 | 85099860 85100008 - | 0        | 0        | 0        |
| Simple_repeat | Simple_repeat | (A)n      | chr10 | 91539514 91539540 + | 0        | 0        | 0        |
| Simple_repeat | Simple_repeat | (A)n      | chr17 | 85929415 85929441 + | 0        | 0        | 0        |
| Simple_repeat | Simple_repeat | (A)n      | chr17 | 87328727 87328752 + | 0        | 0        | 0        |
| SINE          | Alu           | B1_Mus1   | chr17 | 88015348 88015494 - | 0        | 0        | 0        |
| SINE          | Alu           | B1_Mus2   | chr17 | 88061572 88061717 - | 0        | 0        | 0.342623 |
| SINE          | Alu           | B1_Mus2   | chr17 | 88358722 88358868 - | 0        | 0        | 0        |
| SINE          | Alu           | B1_Mus1   | chr17 | 88363793 88363925 - | 0        | 0        | 0        |
| SINE          | Alu           | B1_Mus2   | chr17 | 88478736 88478885 - | 0        | 0        | 0        |
| LTR           | MaLR          | MTA_Mm    | chr17 | 88501436 88501831 + | 0        | 0        | 0        |
| SINE          | Alu           | B1_Mus1   | chr17 | 88524210 88524343 - | 0        | 0        | 0        |
| SINE          | Alu           | B1_Mus2   | chr17 | 88648903 88649049 - | 0        | 0        | 0        |
| SINE          | Alu           | B1_Mus1   | chr17 | 88838885 88839033 - | 0        | 0        | 0        |
| LINE          | L1            | Lx3B      | chr17 | 89631799 89636902 - | 0        | 0        | 0        |
| Simple_repeat | Simple_repeat | (A)n      | chr17 | 91987262 91987306 + | 0.332194 | 0        | 0        |
| SINE          | B2            | B2_Mm1a   | chr17 | 92711419 92711608 + | 0        | 0        | 0        |
| Simple_repeat | Simple_repeat | (A)n      | chr17 | 92726095 92726141 + | 0        | 0        | 0        |
| LINE          | L1            | L1Md_T    | chr17 | 93095180 93101626 - | 0        | 0        | 0        |
| SINE          | Alu           | B1_Mus2   | chr10 | 92389892 92390008 - | 0        | 0        | 0        |
| Simple_repeat | Simple_repeat | (A)n      | chr17 | 93923399 93923427 + | 0        | 0        | 0        |
| LINE          | L1            | L1Md_T    | chr17 | 94022864 94029305 - | 0        | 0        | 0        |
| LTR           | MaLR          | MTA_Mm    | chr17 | 94115791 94116179 - | 0        | 0        | 0        |
| LTR           | MaLR          | MTB       | chr17 | 94144431 94144815 - | 0        | 0        | 0        |
| LTR           | MaLR          | MTA_Mm    | chr17 | 94319055 94319448 + | 0        | 0        | 0        |
| Simple_repeat | Simple_repeat | (A)n      | chr17 | 94484465 94484501 + | 0        | 0        | 0        |
| SINE          | Alu           | B1_Mus1   | chr17 | 95268817 95268962 - | 0        | 0        | 0        |
| SINE          | Alu           | B1_Mm     | chr18 | 3089757 3089876 -   | 0        | 0        | 0        |
| LTR           | MaLR          | MTA_Mm    | chr18 | 3568208 3568602 +   | 0        | 0        | 0        |
| LTR           | MaLR          | MTA_Mm    | chr18 | 3569700 3570094 +   | 0.591053 | 0        | 0        |
| SINE          | Alu           | B1_Mus2   | chr18 | 4477735 4477881 +   | 0        | 0        | 0        |
| Simple_repeat | Simple_repeat | (A)n      | chr18 | 4500541 4500571 +   | 0        | 0.380568 | 0        |
| Simple_repeat | Simple_repeat | (A)n      | chr18 | 4981768 4981812 +   | 0        | 0        | 0        |
| SINE          | Alu           | B1_Mm     | chr18 | 5426557 5426702 -   | 0        | 0        | 0        |
| LTR           | MaLR          | MTA_Mm    | chr18 | 5804371 5804764 +   | 0        | 0        | 0        |
| SINE          | Alu           | B1_Mus2   | chr18 | 5822532 5822678 -   | 0        | 0        | 0        |
| LTR           | ERV1          | MuRRS-int | chr18 | 6546344 6551000 +   | 0        | 0        | 0        |
| LTR           | MaLR          | MTA_Mm    | chr18 | 7770449 7770841 -   | 0        | 0        | 0        |
| SINE          | Alu           | B1_Mus2   | chr18 | 7843342 7843488 +   | 0        | 0.380568 | 0        |
| SINE          | Alu           | B1_Mm     | chr18 | 7856267 7856410 -   | 0        | 0        | 0        |
| Simple_repeat | Simple_repeat | (A)n      | chr18 | 7936239 7936262 +   | 0        | 0        | 0        |
| LTR           | MaLR          | MTA_Mm    | chr18 | 8381589 8381983 -   | 0        | 0        | 0        |
| SINE          | Alu           | B1_Mm     | chr18 | 8608302 8608454 +   | 0        | 0        | 0        |
| Simple_repeat | Simple_repeat | (A)n      | chr18 | 8608455 8608477 +   | 0        | 0        | 0        |
| Simple_repeat | Simple_repeat | (A)n      | chr18 | 8697113 8697158 +   | 0.591053 | 1.41763  | 0.615324 |
| LINE          | L1            | L1VL2     | chr18 | 8798966 8803655 -   | 0        | 0        | 0        |
| Simple_repeat | Simple_repeat | (A)n      | chr18 | 9003743 9003787 +   | 0        | 0        | 0        |
| LTR           | MaLR          | MTA_Mm    | chr18 | 9020935 9021330 -   | 0        | 0        | 0        |
| LTR           | MaLR          | MTB       | chr18 | 9048732 9049127 +   | 0        | 0        | 0        |
| SINE          | Alu           | B1_Mus2   | chr18 | 9502658 9502804 +   | 0        | 0        | 0        |
| Simple_repeat | Simple_repeat | (A)n      | chr18 | 9502805 9502859 +   | 0        | 0        | 0        |
| Simple_repeat | Simple_repeat | (A)n      | chr18 | 9573108 9573156 +   | 0        | 0        | 0        |

|                |                |         |       |                     |          |         |   |
|----------------|----------------|---------|-------|---------------------|----------|---------|---|
| Simple_repeat  | Simple_repeat  | (A)n    | chr18 | 10052261 10052284 + | 0        | 0       | 0 |
| SINE           | Alu            | B1_Mus2 | chr18 | 10263444 10263586 - | 0        | 0       | 0 |
| Simple_repeat  | Simple_repeat  | (GAAA)n | chr18 | 10615678 10615736 + | 0        | 0       | 0 |
| SINE           | Alu            | B1_Mm   | chr18 | 10861769 10861914 + | 0        | 0       | 0 |
| Simple_repeat  | Simple_repeat  | (A)n    | chr18 | 10861915 10861938 + | 0        | 0       | 0 |
| LTR            | MaLR           | MTA_Mm  | chr18 | 10898002 10898397 - | 0        | 0       | 0 |
| LINE           | L1             | L1Md_F2 | chr18 | 11337701 11344102 - | 0        | 0       | 0 |
| LTR            | MaLR           | MTA_Mm  | chr18 | 11650337 11650730 - | 1.05163  | 0       | 0 |
| Simple_repeat  | Simple_repeat  | (A)n    | chr18 | 11776783 11776804 + | 0        | 0       | 0 |
| SINE           | B2             | B2_Mm2  | chr10 | 93283926 93284105 + | 0        | 0       | 0 |
| LTR            | MaLR           | MTA_Mm  | chr18 | 12481354 12481748 + | 0        | 0       | 0 |
| SINE           | Alu            | B1_Mus2 | chr18 | 13728873 13728994 - | 0        | 0       | 0 |
| Simple_repeat  | Simple_repeat  | (A)n    | chr18 | 14482562 14482598 + | 0        | 0       | 0 |
| SINE           | Alu            | B1_Mus2 | chr18 | 15479206 15479351 - | 0        | 0       | 0 |
| LTR            | MaLR           | MTA_Mm  | chr18 | 15494204 15494598 - | 0        | 0       | 0 |
| SINE           | B4             | B4      | chr18 | 16514649 16514897 - | 0        | 0       | 0 |
| Simple_repeat  | Simple_repeat  | (T)n    | chr18 | 16606319 16606343 + | 0        | 0       | 0 |
| LTR            | MaLR           | MTA_Mm  | chr18 | 16674718 16675112 + | 0        | 0       | 0 |
| LINE           | L1             | L1Md_T  | chr18 | 17979385 17986064 - | 0        | 0       | 0 |
| SINE           | Alu            | B1_Mm   | chr18 | 18388935 18389081 - | 0        | 0       | 0 |
| SINE           | Alu            | B1_Mm   | chr18 | 18723522 18723667 + | 0        | 0       | 0 |
| Simple_repeat  | Simple_repeat  | (A)n    | chr18 | 18997476 18997501 + | 0        | 0       | 0 |
| SINE           | Alu            | B1_Mus2 | chr18 | 19552050 19552196 - | 0        | 0       | 0 |
| SINE           | Alu            | B1_Mm   | chr18 | 19613017 19613163 - | 0        | 0       | 0 |
| Simple_repeat  | Simple_repeat  | (A)n    | chr18 | 19983848 19983885 + | 0        | 0       | 0 |
| Simple_repeat  | Simple_repeat  | (A)n    | chr18 | 20655836 20655873 + | 0        | 0       | 0 |
| LINE           | L1             | MusHAL1 | chr18 | 20662336 20664536 + | 0        | 0       | 0 |
| Simple_repeat  | Simple_repeat  | (A)n    | chr18 | 21081785 21081823 + | 0        | 0       | 0 |
| SINE           | Alu            | B1_Mm   | chr18 | 21091495 21091618 + | 0        | 0       | 0 |
| Simple_repeat  | Simple_repeat  | (A)n    | chr18 | 21091619 21091646 + | 0        | 0       | 0 |
| SINE           | Alu            | B1_Mus2 | chr18 | 21203685 21203831 + | 0        | 0       | 0 |
| Simple_repeat  | Simple_repeat  | (A)n    | chr18 | 21203832 21203869 + | 0        | 0       | 0 |
| SINE           | Alu            | B1_Mus2 | chr18 | 21274250 21274396 + | 0        | 0       | 0 |
| Simple_repeat  | Simple_repeat  | (A)n    | chr18 | 21274397 21274430 + | 0        | 0       | 0 |
| Simple_repeat  | Simple_repeat  | (A)n    | chr18 | 21643063 21643094 + | 0        | 0       | 0 |
| Simple_repeat  | Simple_repeat  | (A)n    | chr18 | 21907660 21907688 + | 0        | 0       | 0 |
| LINE           | L1             | L1_Mus3 | chr18 | 22337358 22342617 + | 0        | 0       | 0 |
| Simple_repeat  | Simple_repeat  | (A)n    | chr18 | 22455250 22455297 + | 0        | 0       | 0 |
| SINE           | Alu            | B1_Mur4 | chr10 | 94079442 94079572 + | 0        | 0       | 0 |
| Low_complexity | Low_complexity | GA-rich | chr10 | 94079573 94079657 + | 0        | 0       | 0 |
| SINE           | B2             | B2_Mm1a | chr10 | 94105709 94105901 - | 0        | 0       | 0 |
| Simple_repeat  | Simple_repeat  | (A)n    | chr18 | 24074915 24074990 + | 0.332194 | 0       | 0 |
| SINE           | Alu            | B1_Mus1 | chr18 | 24281169 24281301 - | 0.591053 | 0       | 0 |
| SINE           | Alu            | B1_Mus2 | chr18 | 24354239 24354385 - | 0        | 0       | 0 |
| SINE           | Alu            | B1_Mur2 | chr18 | 24462428 24462575 + | 0        | 1.08938 | 0 |
| Simple_repeat  | Simple_repeat  | (A)n    | chr18 | 24462576 24462620 + | 0        | 1.08938 | 0 |
| Simple_repeat  | Simple_repeat  | (A)n    | chr18 | 24592020 24592083 + | 0        | 0       | 0 |
| Simple_repeat  | Simple_repeat  | (A)n    | chr18 | 24597607 24597646 + | 0        | 0       | 0 |
| LTR            | MaLR           | MTA_Mm  | chr18 | 25972017 25972411 - | 0        | 0       | 0 |
| LTR            | MaLR           | MTA_Mm  | chr18 | 25973506 25973900 - | 0        | 0       | 0 |
| LTR            | MaLR           | MTA_Mm  | chr18 | 26707258 26707652 - | 0        | 0       | 0 |
| LTR            | MaLR           | MTA_Mm  | chr18 | 26844096 26844478 + | 0.591053 | 1.01984 | 0 |
| LTR            | MaLR           | MTA_Mm  | chr18 | 27274716 27275095 - | 0        | 0       | 0 |
| Simple_repeat  | Simple_repeat  | (A)n    | chr18 | 27607534 27607565 + | 0        | 0       | 0 |
| Simple_repeat  | Simple_repeat  | (A)n    | chr18 | 27807682 27807719 + | 0        | 0       | 0 |
| Simple_repeat  | Simple_repeat  | (A)n    | chr18 | 29241465 29241514 + | 0        | 0       | 0 |
| LTR            | MaLR           | MTA_Mm  | chr18 | 29271975 29272368 - | 0        | 0       | 0 |
| SINE           | Alu            | B1_Mus1 | chr18 | 29322149 29322296 - | 0        | 0       | 0 |
| Simple_repeat  | Simple_repeat  | (A)n    | chr18 | 29461790 29461835 + | 0        | 0       | 0 |
| SINE           | Alu            | B1_Mus2 | chr18 | 29777561 29777707 + | 0        | 0       | 0 |
| Simple_repeat  | Simple_repeat  | (A)n    | chr18 | 29777708 29777745 + | 0        | 0       | 0 |
| LTR            | MaLR           | MTA_Mm  | chr18 | 29948978 29949373 - | 0        | 0       | 0 |
| Simple_repeat  | Simple_repeat  | (A)n    | chr18 | 30653631 30653665 + | 0        | 0       | 0 |
| Simple_repeat  | Simple_repeat  | (A)n    | chr18 | 30766618 30766652 + | 0        | 0       | 0 |
| LTR            | MaLR           | MTA_Mm  | chr18 | 31065538 31065932 - | 0        | 0       | 0 |
| Simple_repeat  | Simple_repeat  | (A)n    | chr18 | 31107065 31107090 + | 0        | 0       | 0 |
| SINE           | Alu            | B1_Mus2 | chr18 | 32457135 32457279 - | 0        | 0       | 0 |

|               |               |         |       |                     |          |          |          |
|---------------|---------------|---------|-------|---------------------|----------|----------|----------|
| Simple_repeat | Simple_repeat | (A)n    | chr18 | 32742638 32742680 + | 0        | 0        | 0        |
| SINE          | Alu           | B1_Mus1 | chr18 | 33052291 33052437 - | 0        | 0        | 0        |
| LTR           | MaLR          | MTA_Mm  | chr18 | 33548373 33548740 - | 0        | 0        | 0        |
| Simple_repeat | Simple_repeat | (A)n    | chr18 | 33715092 33715132 + | 0        | 0        | 0        |
| LTR           | MaLR          | MTA_Mm  | chr18 | 33738065 33738459 - | 0        | 0        | 0        |
| SINE          | Alu           | B1_Mus1 | chr10 | 94919419 94919565 - | 0        | 0        | 0        |
| LTR           | MaLR          | MTA_Mm  | chr18 | 34487848 34488243 - | 0        | 0        | 0        |
| SINE          | Alu           | B1_Mus2 | chr18 | 34716415 34716561 + | 0        | 0        | 0        |
| Simple_repeat | Simple_repeat | (A)n    | chr18 | 34716562 34716585 + | 0        | 0        | 0        |
| LTR           | MaLR          | MTA_Mm  | chr10 | 12689712 12690083 + | 0        | 0        | 0        |
| SINE          | Alu           | B1_Mus2 | chr18 | 34848356 34848484 + | 0        | 0        | 0        |
| Simple_repeat | Simple_repeat | (A)n    | chr18 | 34848485 34848510 + | 0.332194 | 0        | 0        |
| SINE          | Alu           | B1_Mur1 | chr18 | 34935847 34935982 - | 0        | 0        | 0        |
| SINE          | Alu           | B1_Mm   | chr18 | 35119173 35119318 + | 0        | 0        | 0        |
| SINE          | Alu           | B1_Mus2 | chr18 | 35158065 35158210 + | 0        | 0        | 0        |
| SINE          | B2            | B2_Mm1a | chr18 | 35916925 35917105 + | 0        | 0        | 0        |
| Simple_repeat | Simple_repeat | (A)n    | chr18 | 35917106 35917132 + | 0        | 0        | 0.342623 |
| SINE          | Alu           | B1_Mm   | chr10 | 95085374 95085520 + | 0        | 0        | 0        |
| Simple_repeat | Simple_repeat | (A)n    | chr10 | 95085521 95085560 + | 0        | 0        | 0        |
| SINE          | Alu           | B1_Mm   | chr18 | 36465370 36465512 + | 1.18211  | 0        | 0        |
| Simple_repeat | Simple_repeat | (A)n    | chr18 | 36465513 36465548 + | 0.591053 | 0        | 0        |
| SINE          | Alu           | B1_Mus2 | chr18 | 36553446 36553591 - | 0        | 0        | 0        |
| LTR           | MaLR          | MTA_Mm  | chr18 | 36653378 36653772 - | 0        | 0        | 0        |
| SINE          | Alu           | B1_Mus2 | chr18 | 36888987 36889133 + | 0        | 0        | 0        |
| Simple_repeat | Simple_repeat | (A)n    | chr18 | 36889134 36889159 + | 0        | 0        | 0        |
| LTR           | MaLR          | MTA_Mm  | chr10 | 95255082 95255476 + | 0        | 0        | 0        |
| Simple_repeat | Simple_repeat | (A)n    | chr18 | 38184591 38184620 + | 0        | 0        | 0        |
| Simple_repeat | Simple_repeat | (A)n    | chr18 | 38744664 38744695 + | 0        | 0        | 0        |
| SINE          | Alu           | PB1D10  | chr18 | 38988271 38988373 + | 0        | 0        | 0        |
| Simple_repeat | Simple_repeat | (A)n    | chr18 | 38988374 38988398 + | 0        | 0        | 0        |
| Simple_repeat | Simple_repeat | (A)n    | chr18 | 39728964 39728992 + | 0        | 0        | 0        |
| Simple_repeat | Simple_repeat | (TTTA)n | chr18 | 39733971 39734006 + | 0        | 0        | 0        |
| Simple_repeat | Simple_repeat | (A)n    | chr18 | 41244228 41244264 + | 0        | 0        | 0        |
| Simple_repeat | Simple_repeat | (A)n    | chr18 | 41353615 41353650 + | 0        | 0        | 0        |
| Simple_repeat | Simple_repeat | (A)n    | chr18 | 41654423 41654473 + | 0        | 0        | 0        |
| SINE          | Alu           | B1_Mm   | chr18 | 41825925 41826058 - | 0.591053 | 0        | 0        |
| LTR           | MaLR          | MTA_Mm  | chr18 | 42161228 42161621 - | 0        | 0        | 0        |
| SINE          | Alu           | B1_Mm   | chr18 | 42358387 42358533 - | 0        | 0        | 0        |
| Simple_repeat | Simple_repeat | (A)n    | chr10 | 95697541 95697579 + | 0        | 0        | 0        |
| SINE          | Alu           | B1_Mus2 | chr18 | 42584979 42585115 + | 0        | 0        | 0        |
| Simple_repeat | Simple_repeat | (A)n    | chr18 | 42585116 42585148 + | 0        | 0        | 0        |
| Simple_repeat | Simple_repeat | (TTTA)n | chr18 | 42618184 42618215 + | 0        | 0        | 0        |
| Simple_repeat | Simple_repeat | (A)n    | chr10 | 95727222 95727260 + | 0        | 0        | 0        |
| Simple_repeat | Simple_repeat | (A)n    | chr18 | 42753173 42753211 + | 0        | 0        | 0        |
| LINE          | L1            | L1Md_T  | chr18 | 43870217 43876428 - | 0        | 0        | 0        |
| SINE          | Alu           | B1_Mus1 | chr18 | 43979917 43980064 - | 0        | 0        | 0        |
| SINE          | Alu           | B1_Mus1 | chr18 | 44091297 44091438 + | 0        | 0        | 0        |
| Simple_repeat | Simple_repeat | (A)n    | chr18 | 44091439 44091484 + | 0        | 0        | 0        |
| Simple_repeat | Simple_repeat | (A)n    | chr10 | 96008661 96008693 + | 0        | 0        | 0        |
| SINE          | Alu           | B1_Mm   | chr18 | 46780107 46780252 - | 0        | 0        | 0        |
| LTR           | MaLR          | MTA_Mm  | chr18 | 47277938 47278333 + | 0        | 0        | 0        |
| SINE          | Alu           | B1_Mm   | chr18 | 47665935 47666087 + | 0        | 0.708814 | 0        |
| Simple_repeat | Simple_repeat | (A)n    | chr18 | 47666088 47666120 + | 0        | 0        | 0        |
| LINE          | L1            | L1Md_T  | chr18 | 48370273 48377565 - | 0        | 0.761137 | 0        |
| Simple_repeat | Simple_repeat | (A)n    | chr18 | 48466716 48466787 + | 0        | 0        | 0        |
| LTR           | MaLR          | MTA_Mm  | chr18 | 48611184 48611578 + | 0        | 0        | 0        |
| LINE          | L1            | L1_Mus2 | chr18 | 48746984 48752642 + | 0        | 0        | 0        |
| SINE          | Alu           | B1_Mus1 | chr18 | 49243111 49243257 - | 0        | 0        | 0        |
| Simple_repeat | Simple_repeat | (A)n    | chr10 | 96357538 96357577 + | 0        | 0        | 0.342623 |
| Simple_repeat | Simple_repeat | (A)n    | chr10 | 96363882 96363918 + | 0        | 0        | 0        |
| SINE          | Alu           | B1F2    | chr18 | 50384246 50384368 + | 0        | 0        | 0        |
| Simple_repeat | Simple_repeat | (A)n    | chr18 | 50384369 50384415 + | 0        | 0        | 0        |
| LINE          | L1            | L1Md_T  | chr18 | 50421619 50428042 - | 0        | 0        | 0        |
| Simple_repeat | Simple_repeat | (A)n    | chr18 | 51059636 51059686 + | 0        | 0        | 0        |
| Simple_repeat | Simple_repeat | (A)n    | chr10 | 96486012 96486060 + | 0        | 0        | 0        |
| Simple_repeat | Simple_repeat | (A)n    | chr18 | 52114575 52114614 + | 0        | 0        | 0        |
| SINE          | Alu           | B1_Mm   | chr18 | 52735047 52735172 + | 0        | 0        | 0        |

|                |                |         |       |                     |          |          |          |
|----------------|----------------|---------|-------|---------------------|----------|----------|----------|
| Simple_repeat  | Simple_repeat  | (A)n    | chr18 | 52735173 52735196 + | 0        | 0        | 0        |
| LTR            | MaLR           | MTA_Mm  | chr18 | 52769966 52770362 + | 0        | 0        | 0        |
| LTR            | MaLR           | MTA_Mm  | chr18 | 52847341 52847733 + | 0        | 0        | 0        |
| Simple_repeat  | Simple_repeat  | (A)n    | chr18 | 52917911 52917955 + | 0        | 0        | 0        |
| SINE           | Alu            | B1_Mus1 | chr10 | 96653357 96653475 - | 0        | 0        | 0        |
| SINE           | Alu            | B1_Mur4 | chr18 | 53321787 53321937 + | 0        | 0        | 0        |
| Simple_repeat  | Simple_repeat  | (A)n    | chr18 | 53321938 53321991 + | 0        | 0        | 0        |
| SINE           | Alu            | B1_Mus2 | chr18 | 53393377 53393524 - | 0        | 0        | 0.615324 |
| SINE           | Alu            | B1_Mus1 | chr18 | 54268311 54268435 - | 0        | 0        | 0        |
| SINE           | Alu            | B1_Mm   | chr18 | 54500993 54501138 + | 0        | 0        | 0        |
| LTR            | MaLR           | ORR1B2  | chr18 | 54501139 54501487 + | 0.332194 | 0        | 0        |
| SINE           | Alu            | B1_Mus1 | chr10 | 96812518 96812665 + | 0        | 0        | 0        |
| Low_complexity | Low_complexity | A-rich  | chr10 | 96812668 96812776 + | 0        | 0        | 0        |
| Simple_repeat  | Simple_repeat  | (A)n    | chr18 | 54899107 54899143 + | 0        | 0        | 0        |
| Simple_repeat  | Simple_repeat  | (A)n    | chr18 | 54958509 54958566 + | 0        | 0        | 0        |
| Simple_repeat  | Simple_repeat  | (A)n    | chr18 | 54977832 54977857 + | 0        | 0        | 0        |
| Simple_repeat  | Simple_repeat  | (A)n    | chr10 | 96895878 96895923 + | 0        | 0        | 0        |
| Simple_repeat  | Simple_repeat  | (A)n    | chr10 | 96923244 96923304 + | 0        | 0        | 0        |
| SINE           | Alu            | B1_Mm   | chr18 | 55925669 55925822 + | 0        | 0        | 0        |
| SINE           | Alu            | B1_Mm   | chr18 | 55991243 55991389 - | 0        | 0        | 0        |
| Other          | Other          | RMER1A  | chr18 | 56353455 56354337 + | 0        | 0        | 0        |
| Simple_repeat  | Simple_repeat  | (A)n    | chr18 | 56441985 56442018 + | 0        | 0        | 0        |
| SINE           | Alu            | B1_Mm   | chr18 | 56775449 56775594 - | 0        | 0        | 0        |
| SINE           | Alu            | B1_Mus2 | chr18 | 56836666 56836813 - | 0        | 0        | 0        |
| SINE           | Alu            | B1_Mus2 | chr18 | 57088719 57088865 + | 0        | 0        | 0        |
| LTR            | MaLR           | MTA_Mm  | chr18 | 57616671 57617066 - | 0        | 0        | 0        |
| SINE           | Alu            | B1_Mm   | chr18 | 58123858 58124005 + | 0        | 0        | 0        |
| Simple_repeat  | Simple_repeat  | (A)n    | chr18 | 58124006 58124076 + | 0        | 0        | 0.342623 |
| LTR            | MaLR           | MTA_Mm  | chr18 | 58666906 58667305 + | 0        | 0        | 0        |
| SINE           | Alu            | B1_Mus1 | chr18 | 58917896 58918042 - | 0        | 0        | 0        |
| SINE           | Alu            | B1_Mus1 | chr18 | 59297080 59297213 - | 0        | 0        | 0        |
| Simple_repeat  | Simple_repeat  | (A)n    | chr18 | 59579556 59579596 + | 2.36421  | 1.41763  | 0.615324 |
| Simple_repeat  | Simple_repeat  | (A)n    | chr18 | 59741725 59741771 + | 0        | 0        | 0        |
| Simple_repeat  | Simple_repeat  | (A)n    | chr18 | 59897335 59897361 + | 0        | 0        | 0        |
| LINE           | L1             | L1Md_T  | chr18 | 60107452 60114739 - | 0        | 0        | 0        |
| LINE           | L1             | L1_Mus1 | chr18 | 60321314 60327628 + | 0        | 0        | 0        |
| Simple_repeat  | Simple_repeat  | (A)n    | chr18 | 61449375 61449405 + | 0        | 0.708814 | 0        |
| SINE           | Alu            | B1_Mus1 | chr18 | 62102137 62102280 - | 0        | 0        | 0        |
| Simple_repeat  | Simple_repeat  | (A)n    | chr18 | 62264007 62264043 + | 0        | 0        | 0        |
| LTR            | MaLR           | MTB     | chr18 | 62437989 62438387 + | 0        | 0        | 0        |
| Simple_repeat  | Simple_repeat  | (A)n    | chr10 | 97693772 97693807 + | 0        | 0        | 0        |
| Simple_repeat  | Simple_repeat  | (A)n    | chr18 | 62952345 62952381 + | 0        | 0        | 0        |
| Simple_repeat  | Simple_repeat  | (A)n    | chr18 | 64494502 64494540 + | 0        | 0        | 0        |
| SINE           | Alu            | B1_Mus1 | chr18 | 65708481 65708626 + | 0        | 0        | 0        |
| Simple_repeat  | Simple_repeat  | (A)n    | chr18 | 65708627 65708658 + | 0        | 0        | 0        |
| SINE           | Alu            | B1_Mm   | chr18 | 65849648 65849794 - | 0        | 0        | 0        |
| LTR            | MaLR           | MTA_Mm  | chr18 | 65947192 65947572 + | 0        | 0        | 0        |
| Simple_repeat  | Simple_repeat  | (A)n    | chr18 | 66475516 66475549 + | 0        | 0        | 0        |
| LTR            | MaLR           | MTA_Mm  | chr18 | 66884398 66884790 - | 0.332194 | 0        | 0        |
| Simple_repeat  | Simple_repeat  | (A)n    | chr18 | 67409855 67409895 + | 0        | 0        | 0.615324 |
| SINE           | Alu            | B1_Mus2 | chr18 | 67433700 67433827 + | 0        | 0        | 0        |
| Simple_repeat  | Simple_repeat  | (A)n    | chr18 | 67433828 67433859 + | 0        | 0        | 0        |
| SINE           | Alu            | B1_Mus2 | chr18 | 67821100 67821240 + | 0        | 0        | 0        |
| Simple_repeat  | Simple_repeat  | (A)n    | chr18 | 67821241 67821288 + | 0.332194 | 0        | 0        |
| SINE           | Alu            | B1_Mm   | chr18 | 67925778 67925925 + | 0        | 0        | 0        |
| LTR            | MaLR           | MTA_Mm  | chr18 | 68073372 68073767 - | 0        | 0        | 0.342623 |
| LTR            | MaLR           | MTA_Mm  | chr18 | 68074865 68075260 - | 0        | 0        | 0        |
| LTR            | MaLR           | MTB     | chr18 | 69431918 69432301 + | 0        | 0        | 0        |
| LTR            | MaLR           | MTA_Mm  | chr18 | 69919004 69919397 - | 0        | 0        | 0        |
| LTR            | MaLR           | MTA_Mm  | chr18 | 69920497 69920891 - | 0        | 0        | 0        |
| SINE           | Alu            | B1_Mus1 | chr18 | 69958118 69958266 - | 0        | 0        | 0        |
| LTR            | MaLR           | MTB     | chr18 | 70135641 70136040 - | 0        | 0        | 0        |
| SINE           | Alu            | B1_Mus1 | chr18 | 70696821 70696968 - | 0        | 0        | 0        |
| LINE           | L1             | L1Md_T  | chr18 | 70934968 70941530 - | 0        | 0        | 0        |
| SINE           | Alu            | B1_Mm   | chr18 | 71041419 71041565 - | 0        | 0        | 0        |
| LTR            | MaLR           | MTB     | chr18 | 72762758 72763155 - | 0        | 0        | 0        |
| Simple_repeat  | Simple_repeat  | (A)n    | chr18 | 73201707 73201744 + | 0        | 0        | 0        |

|                |                |         |       |                     |          |          |          |
|----------------|----------------|---------|-------|---------------------|----------|----------|----------|
| Simple_repeat  | Simple_repeat  | (A)n    | chr18 | 73254331 73254363 + | 0        | 0        | 0        |
| Simple_repeat  | Simple_repeat  | (A)n    | chr18 | 73265269 73265301 + | 0        | 0        | 0        |
| LTR            | MaLR           | MTA_Mm  | chr18 | 73531376 73531768 - | 0        | 0        | 0        |
| Simple_repeat  | Simple_repeat  | (A)n    | chr18 | 73756797 73756838 + | 0        | 0        | 0        |
| SINE           | Alu            | B1_Mus2 | chr18 | 74268085 74268225 + | 0        | 0        | 0        |
| Simple_repeat  | Simple_repeat  | (A)n    | chr18 | 74268226 74268252 + | 0        | 0        | 0        |
| SINE           | Alu            | B1_Mus1 | chr18 | 74396249 74396396 + | 0        | 0        | 0        |
| Simple_repeat  | Simple_repeat  | (A)n    | chr18 | 74396397 74396434 + | 0        | 0        | 0        |
| Simple_repeat  | Simple_repeat  | (A)n    | chr18 | 75448185 75448228 + | 0        | 0        | 0.615324 |
| LTR            | MaLR           | MTB     | chr18 | 75578559 75578959 + | 0        | 0        | 0        |
| LTR            | MaLR           | MTA_Mm  | chr10 | 99165030 99165410 - | 0        | 0        | 0        |
| Low_complexity | Low_complexity | A-rich  | chr18 | 77978973 77979078 + | 0        | 0        | 0        |
| LTR            | MaLR           | MTA_Mm  | chr18 | 78806194 78806563 + | 0        | 0        | 0        |
| Simple_repeat  | Simple_repeat  | (A)n    | chr18 | 78816285 78816311 + | 0        | 0        | 0        |
| Simple_repeat  | Simple_repeat  | (A)n    | chr18 | 79716502 79716541 + | 0        | 0.380568 | 0        |
| SINE           | Alu            | B1_Mm   | chr18 | 79815913 79816059 - | 0        | 0        | 0        |
| Simple_repeat  | Simple_repeat  | (A)n    | chr18 | 80016999 80017031 + | 0        | 0        | 0        |
| LTR            | MaLR           | MTB     | chr18 | 80107558 80107955 + | 0        | 0        | 0        |
| LTR            | MaLR           | MTA_Mm  | chr18 | 80576457 80576853 + | 0        | 0        | 0        |
| LTR            | MaLR           | MTB     | chr10 | 99574978 99575374 + | 0        | 0        | 0        |
| Simple_repeat  | Simple_repeat  | (A)n    | chr18 | 81553335 81553374 + | 0        | 0        | 0.615324 |
| LTR            | MaLR           | MTA_Mm  | chr18 | 81698536 81698930 + | 0        | 0        | 0        |
| Simple_repeat  | Simple_repeat  | (A)n    | chr18 | 82319965 82319994 + | 0        | 0        | 0        |
| SINE           | Alu            | B1_Mus1 | chr18 | 83052231 83052372 - | 0        | 0        | 0        |
| SINE           | Alu            | B1_Mm   | chr18 | 83259215 83259361 - | 0        | 0        | 0        |
| Simple_repeat  | Simple_repeat  | (A)n    | chr18 | 83371820 83371855 + | 0        | 0        | 0        |
| Simple_repeat  | Simple_repeat  | (A)n    | chr18 | 83551244 83551275 + | 0        | 0        | 0        |
| LTR            | MaLR           | MTA_Mm  | chr18 | 84766836 84767226 - | 0        | 0        | 0        |
| SINE           | Alu            | B1_Mus2 | chr18 | 84856809 84856955 + | 0        | 0        | 0        |
| Simple_repeat  | Simple_repeat  | (A)n    | chr18 | 84856956 84856979 + | 0        | 0        | 0        |
| SINE           | Alu            | B1_Mus2 | chr18 | 84864102 84864248 + | 0        | 0        | 0        |
| Simple_repeat  | Simple_repeat  | (A)n    | chr18 | 84864249 84864271 + | 0        | 0        | 0        |
| SINE           | Alu            | B1_Mus2 | chr18 | 85239437 85239583 - | 0        | 0        | 0        |
| LINE           | L1             | L1Md_T  | chr18 | 85243799 85249965 - | 0        | 0        | 0        |
| LTR            | MaLR           | MTB     | chr18 | 85762455 85762854 - | 0.591053 | 0        | 0        |
| LINE           | L1             | L1Md_F2 | chr18 | 86052965 86058206 + | 0        | 0        | 0        |
| Simple_repeat  | Simple_repeat  | (A)n    | chr18 | 86126430 86126464 + | 0        | 0        | 0        |
| LINE           | L1             | L1Md_T  | chr10 | 10013795 10014421 - | 0        | 0        | 0        |
| SINE           | Alu            | B1_Mm   | chr18 | 86553986 86554135 - | 0        | 0        | 0        |
| Simple_repeat  | Simple_repeat  | (A)n    | chr18 | 86893504 86893535 + | 0.591053 | 0        | 0        |
| Simple_repeat  | Simple_repeat  | (A)n    | chr18 | 87120587 87120634 + | 0        | 0        | 0        |
| Simple_repeat  | Simple_repeat  | (A)n    | chr18 | 87402035 87402077 + | 0        | 0        | 0        |
| LINE           | L1             | L1Md_T  | chr18 | 87946452 87952725 - | 0        | 0        | 0        |
| LINE           | L1             | L1Md_F3 | chr18 | 88095741 88100732 + | 0        | 0        | 0        |
| SINE           | Alu            | B1_Mus1 | chr18 | 88184852 88184999 + | 0        | 0        | 0        |
| LTR            | ERVK           | RLTR40  | chr18 | 88302633 88303354 - | 0        | 0        | 0        |
| SINE           | Alu            | B1_Mus1 | chr18 | 88449432 88449582 - | 0        | 0        | 0        |
| SINE           | Alu            | B1_Mus1 | chr18 | 88723407 88723553 - | 0        | 0        | 0        |
| Simple_repeat  | Simple_repeat  | (A)n    | chr18 | 89939591 89939636 + | 0.332194 | 0.708814 | 0.615324 |
| LTR            | MaLR           | MTA_Mm  | chr10 | 10053254 10053294 - | 0.591053 | 0        | 0        |
| LTR            | MaLR           | MTA_Mm  | chr10 | 10053400 10053439 - | 0        | 0        | 0        |
| SINE           | Alu            | B1_Mus1 | chr19 | 3705813 3705953 -   | 0        | 0        | 0        |
| SINE           | Alu            | B1_Mm   | chr19 | 3827422 3827568 +   | 0        | 0        | 0        |
| Simple_repeat  | Simple_repeat  | (A)n    | chr19 | 3827569 3827608 +   | 0        | 0        | 0        |
| SINE           | Alu            | B1_Mm   | chr19 | 3828136 3828274 +   | 0        | 0        | 0        |
| Simple_repeat  | Simple_repeat  | (A)n    | chr19 | 3828275 3828297 +   | 0        | 0        | 0        |
| LTR            | MaLR           | MTA_Mm  | chr19 | 4074319 4074712 -   | 0        | 0        | 0        |
| SINE           | Alu            | B1_Mm   | chr19 | 4090151 4090297 -   | 0        | 0        | 0        |
| SINE           | Alu            | B1_Mus1 | chr19 | 4211142 4211289 +   | 0        | 0        | 0        |
| Simple_repeat  | Simple_repeat  | (A)n    | chr19 | 4211290 4211309 +   | 0        | 0        | 0        |
| Simple_repeat  | Simple_repeat  | (A)n    | chr10 | 10078193 10078196 + | 0        | 0        | 0        |
| SINE           | Alu            | B1_Mus1 | chr19 | 4845064 4845208 +   | 0        | 0        | 0        |
| Simple_repeat  | Simple_repeat  | (A)n    | chr19 | 4845209 4845240 +   | 0        | 0        | 0        |
| SINE           | Alu            | B1_Mus2 | chr19 | 5017178 5017324 +   | 0        | 0        | 0        |
| Simple_repeat  | Simple_repeat  | (A)n    | chr19 | 5017325 5017347 +   | 0        | 0        | 0        |
| SINE           | Alu            | B1_Mus1 | chr19 | 5077728 5077874 -   | 0        | 0        | 0.615324 |
| SINE           | Alu            | B1_Mm   | chr19 | 5124031 5124178 +   | 0        | 0        | 0        |

|               |               |         |       |          |          |   |          |          |          |
|---------------|---------------|---------|-------|----------|----------|---|----------|----------|----------|
| Simple_repeat | Simple_repeat | (A)n    | chr19 | 5124179  | 5124226  | + | 0        | 0        | 0        |
| SINE          | Alu           | B1_Mus1 | chr19 | 5427612  | 5427730  | + | 0        | 0        | 0.615324 |
| Simple_repeat | Simple_repeat | (A)n    | chr19 | 5427731  | 5427751  | + | 0        | 0        | 0.615324 |
| Simple_repeat | Simple_repeat | (A)n    | chr19 | 6096511  | 6096538  | + | 0        | 0        | 0        |
| SINE          | Alu           | B1_Mm   | chr19 | 6584348  | 6584468  | - | 0        | 0        | 0        |
| SINE          | B2            | B2_Mm1a | chr19 | 6679833  | 6680024  | - | 0        | 0        | 0        |
| SINE          | B2            | B2_Mm1a | chr19 | 7293964  | 7294154  | - | 0        | 0        | 0        |
| SINE          | B2            | B2_Mm1a | chr19 | 7327208  | 7327400  | + | 0        | 0        | 0        |
| Simple_repeat | Simple_repeat | (A)n    | chr19 | 7327401  | 7327436  | + | 0        | 0        | 0        |
| SINE          | Alu           | PB1D9   | chr19 | 8760132  | 8760229  | - | 0        | 0        | 0        |
| SINE          | Alu           | B1_Mus2 | chr19 | 8939330  | 8939476  | - | 0        | 0        | 0.342623 |
| Simple_repeat | Simple_repeat | (A)n    | chr19 | 8944989  | 8945020  | + | 0        | 0        | 0        |
| LTR           | MaLR          | MTA_Mm  | chr19 | 10435750 | 10436143 | - | 0        | 0        | 0        |
| SINE          | Alu           | B1_Mus1 | chr19 | 10706805 | 10706950 | + | 0        | 0.380568 | 0        |
| Simple_repeat | Simple_repeat | (A)n    | chr19 | 10706951 | 10706999 | + | 0        | 0        | 0        |
| SINE          | Alu           | B1_Mm   | chr19 | 11802292 | 11802438 | + | 0        | 0        | 0        |
| Simple_repeat | Simple_repeat | (GAAA)n | chr19 | 11802439 | 11802562 | + | 0        | 0        | 0        |
| SINE          | Alu           | B1_Mus1 | chr19 | 11957739 | 11957860 | - | 0        | 0        | 0        |
| SINE          | Alu           | B1_Mus1 | chr19 | 12231754 | 12231896 | + | 0        | 0        | 0        |
| Simple_repeat | Simple_repeat | (A)n    | chr19 | 12231897 | 12231916 | + | 0        | 0        | 0        |
| SINE          | Alu           | B1_Mm   | chr19 | 12796790 | 12796936 | - | 0        | 0        | 0        |
| SINE          | Alu           | B1_Mm   | chr19 | 12829338 | 12829483 | + | 0        | 0        | 0        |
| Simple_repeat | Simple_repeat | (A)n    | chr19 | 12829484 | 12829534 | + | 0        | 0.380568 | 0        |
| LTR           | MaLR          | MTA_Mm  | chr19 | 13314864 | 13315258 | + | 0        | 0        | 0        |
| SINE          | Alu           | B1_Mus1 | chr19 | 13334458 | 13334606 | - | 0        | 0        | 0        |
| LTR           | MaLR          | MTA_Mm  | chr19 | 14174456 | 14174851 | + | 0        | 0        | 0        |
| SINE          | Alu           | B1_Mus2 | chr19 | 14717569 | 14717715 | + | 0        | 0        | 0        |
| Simple_repeat | Simple_repeat | (A)n    | chr19 | 14717716 | 14717745 | + | 0        | 0        | 0        |
| Simple_repeat | Simple_repeat | (A)n    | chr19 | 14890298 | 14890347 | + | 0        | 0        | 0        |
| SINE          | Alu           | B1_Mus1 | chr10 | 10194394 | 10194409 | + | 0        | 0        | 0        |
| Simple_repeat | Simple_repeat | (A)n    | chr10 | 10194409 | 10194412 | + | 0        | 0        | 0        |
| SINE          | Alu           | B1_Mus2 | chr19 | 15003945 | 15004091 | + | 0        | 0        | 0        |
| Simple_repeat | Simple_repeat | (A)n    | chr19 | 15004099 | 15004127 | + | 0        | 0        | 0        |
| Simple_repeat | Simple_repeat | (A)n    | chr19 | 15393298 | 15393324 | + | 0        | 0        | 0        |
| SINE          | Alu           | B1_Mus2 | chr19 | 15475002 | 15475153 | - | 0        | 0        | 0        |
| SINE          | Alu           | B1_Mm   | chr19 | 15605740 | 15605890 | - | 0        | 0        | 0        |
| SINE          | B2            | B2_Mm1a | chr19 | 15959439 | 15959633 | - | 0        | 0        | 0        |
| SINE          | Alu           | B1_Mm   | chr19 | 16001482 | 16001628 | + | 0        | 0        | 0        |
| LTR           | MaLR          | MTA_Mm  | chr19 | 16087981 | 16088370 | + | 0        | 0        | 0        |
| LTR           | MaLR          | MTA_Mm  | chr19 | 18213872 | 18214265 | + | 0        | 0        | 0        |
| LTR           | MaLR          | MTA_Mm  | chr10 | 10230185 | 10230224 | + | 0        | 0        | 0        |
| SINE          | Alu           | B1_Mus2 | chr19 | 18647040 | 18647195 | + | 0        | 0        | 0        |
| Simple_repeat | Simple_repeat | (A)n    | chr19 | 18647196 | 18647234 | + | 0        | 0        | 0        |
| SINE          | Alu           | B1_Mus1 | chr19 | 18648926 | 18649073 | - | 0.332194 | 0        | 0        |
| Simple_repeat | Simple_repeat | (A)n    | chr10 | 10233774 | 10233783 | + | 0        | 0        | 0        |
| SINE          | Alu           | B1_Mm   | chr19 | 18743477 | 18743621 | - | 0        | 0        | 0        |
| SINE          | Alu           | B1_Mus1 | chr19 | 18794272 | 18794418 | - | 0        | 0        | 0        |
| LTR           | MaLR          | MTA_Mm  | chr19 | 19593980 | 19594375 | - | 0        | 0        | 0        |
| LTR           | MaLR          | MTA_Mm  | chr19 | 20034010 | 20034405 | + | 0        | 0        | 0        |
| LTR           | MaLR          | MTA_Mm  | chr19 | 20122207 | 20122602 | + | 0        | 0        | 0        |
| LTR           | MaLR          | MTA_Mm  | chr19 | 20261434 | 20261829 | - | 0        | 0        | 0        |
| SINE          | Alu           | B1_Mus1 | chr19 | 20304059 | 20304177 | + | 0        | 0        | 0        |
| Simple_repeat | Simple_repeat | (A)n    | chr19 | 20304178 | 20304211 | + | 0        | 0        | 0        |
| Simple_repeat | Simple_repeat | (A)n    | chr10 | 10250894 | 10250896 | + | 0.332194 | 0        | 0        |
| LINE          | L1            | L1Md_T  | chr19 | 20641820 | 20648285 | - | 0        | 0        | 0        |
| LTR           | MaLR          | MTA_Mm  | chr19 | 22039581 | 22039975 | - | 0.332194 | 0        | 0        |
| LTR           | MaLR          | MTA_Mm  | chr19 | 22041075 | 22041469 | - | 0        | 0        | 0        |
| SINE          | Alu           | B1_Mm   | chr19 | 22164720 | 22164867 | + | 0.591053 | 1.7982   | 1.23065  |
| Simple_repeat | Simple_repeat | (A)n    | chr19 | 22164868 | 22164888 | + | 0.591053 | 1.08938  | 1.23065  |
| LTR           | MaLR          | MTA_Mm  | chr19 | 22204308 | 22204702 | - | 0        | 0        | 0        |
| LTR           | MaLR          | MTA_Mm  | chr19 | 23104524 | 23104920 | - | 0        | 0        | 0        |
| SINE          | Alu           | B1_Mm   | chr19 | 23133864 | 23134010 | - | 0        | 0        | 0.342623 |
| SINE          | Alu           | B1_Mus2 | chr19 | 23134048 | 23134194 | - | 0        | 0        | 0        |
| Simple_repeat | Simple_repeat | (GAA)n  | chr19 | 23149084 | 23149140 | + | 0        | 0        | 0        |
| LTR           | MaLR          | MTA_Mm  | chr19 | 23175485 | 23175880 | + | 0        | 0        | 0        |
| SINE          | Alu           | B1_Mus1 | chr19 | 23177712 | 23177859 | - | 0        | 0        | 0        |
| SINE          | Alu           | B1_Mus2 | chr10 | 10291654 | 10291669 | + | 0        | 0        | 0        |

|               |               |         |       |                     |          |          |          |
|---------------|---------------|---------|-------|---------------------|----------|----------|----------|
| LTR           | MaLR          | MTA_Mm  | chr10 | 10298541 10298581 - | 0        | 0        | 0        |
| LTR           | MaLR          | MTA_Mm  | chr10 | 10298690 10298729 - | 0        | 0        | 0        |
| Simple_repeat | Simple_repeat | (A)n    | chr10 | 10306608 10306612 + | 0        | 0        | 0        |
| LTR           | MaLR          | MTA_Mm  | chr19 | 25907230 25907629 + | 0        | 0        | 0        |
| LTR           | MaLR          | MTEa    | chr19 | 26133047 26133394 - | 0        | 0        | 0        |
| SINE          | Alu           | B1_Mus1 | chr19 | 26361369 26361516 + | 0        | 0        | 0        |
| Simple_repeat | Simple_repeat | (A)n    | chr19 | 26361517 26361549 + | 0.332194 | 0        | 0        |
| LTR           | MaLR          | MTA_Mm  | chr19 | 26610794 26611184 - | 0        | 0        | 0        |
| LTR           | MaLR          | MTB     | chr19 | 26617862 26618241 + | 0        | 0        | 0.615324 |
| Simple_repeat | Simple_repeat | (A)n    | chr19 | 26998710 26998747 + | 0        | 0        | 0        |
| SINE          | Alu           | B1_Mus1 | chr19 | 27102135 27102283 - | 0        | 0        | 0.342623 |
| SINE          | Alu           | B1_Mus2 | chr19 | 27417240 27417386 + | 0        | 0        | 0        |
| LTR           | MaLR          | MTA_Mm  | chr19 | 27513852 27514248 - | 0        | 0        | 0        |
| SINE          | Alu           | B1_Mm   | chr19 | 27572527 27572674 - | 0        | 0        | 0        |
| LTR           | MaLR          | MTB     | chr19 | 28258806 28259201 + | 0        | 0        | 0        |
| SINE          | Alu           | B1_Mus2 | chr19 | 28889841 28889987 + | 0        | 0        | 0        |
| Simple_repeat | Simple_repeat | (A)n    | chr19 | 28889988 28890008 + | 0        | 0        | 0        |
| SINE          | Alu           | B1_Mm   | chr19 | 28908738 28908884 + | 0        | 0        | 0        |
| Simple_repeat | Simple_repeat | (A)n    | chr19 | 28908885 28908910 + | 0        | 0        | 0        |
| LTR           | MaLR          | MTB     | chr10 | 10338822 10338860 + | 0        | 0        | 0        |
| SINE          | Alu           | B1_Mus2 | chr19 | 29909683 29909829 + | 0        | 0        | 0        |
| Simple_repeat | Simple_repeat | (A)n    | chr19 | 29909830 29909876 + | 0        | 0        | 0        |
| Simple_repeat | Simple_repeat | (A)n    | chr10 | 10354169 10354176 + | 0        | 0        | 0        |
| Simple_repeat | Simple_repeat | (A)n    | chr10 | 10356117 10356123 + | 0        | 0        | 0        |
| SINE          | B2            | B2_Mm1t | chr19 | 32192069 32192256 + | 0        | 0        | 0        |
| LTR           | MaLR          | MTA_Mm  | chr19 | 33053204 33053602 - | 0        | 0        | 0        |
| scRNA         | scRNA         | 4.5SRNA | chr19 | 33191619 33191711 - | 0        | 0        | 0        |
| Simple_repeat | Simple_repeat | (A)n    | chr19 | 34525384 34525431 + | 0.332194 | 0        | 0        |
| SINE          | Alu           | B1_Mus2 | chr19 | 34870294 34870439 - | 0        | 0        | 0.342623 |
| SINE          | Alu           | B1_Mm   | chr19 | 34984337 34984485 + | 0        | 0        | 0        |
| Simple_repeat | Simple_repeat | (A)n    | chr19 | 34984486 34984524 + | 0        | 0        | 0        |
| SINE          | Alu           | B1_Mur2 | chr19 | 35098062 35098207 + | 0        | 0        | 0        |
| Simple_repeat | Simple_repeat | (A)n    | chr19 | 35779707 35779758 + | 0        | 0        | 0.615324 |
| LTR           | MaLR          | MTA_Mm  | chr19 | 35794164 35794557 - | 0        | 0        | 0        |
| SINE          | Alu           | B1_Mus1 | chr19 | 35923113 35923258 + | 0        | 0        | 0        |
| SINE          | Alu           | B1_Mus2 | chr19 | 36893551 36893697 - | 0        | 0        | 0        |
| Simple_repeat | Simple_repeat | (A)n    | chr19 | 37449267 37449309 + | 0        | 0.380568 | 0.615324 |
| SINE          | Alu           | B1_Mm   | chr19 | 37943755 37943897 + | 0        | 0        | 0        |
| Simple_repeat | Simple_repeat | (A)n    | chr19 | 37943898 37943918 + | 0        | 0        | 0        |
| SINE          | Alu           | B1_Mus2 | chr19 | 37946337 37946482 + | 0        | 0        | 0        |
| Simple_repeat | Simple_repeat | (GAAA)n | chr19 | 37946485 37946550 + | 0        | 0        | 0        |
| SINE          | Alu           | B1_Mm   | chr19 | 38402108 38402254 - | 0.591053 | 0        | 0        |
| SINE          | Alu           | B1_Mm   | chr19 | 38409012 38409158 + | 0        | 0        | 0        |
| Simple_repeat | Simple_repeat | (A)n    | chr19 | 38409159 38409182 + | 0        | 0        | 0        |
| SINE          | Alu           | B1_Mus2 | chr19 | 38496837 38496984 - | 0        | 0        | 0        |
| Simple_repeat | Simple_repeat | (A)n    | chr10 | 10447293 10447297 + | 0        | 0        | 0        |
| LINE          | L1            | Lx2     | chr19 | 40189487 40194397 + | 0        | 0        | 0        |
| LTR           | MaLR          | MTA_Mm  | chr19 | 40363599 40363996 + | 0        | 0        | 0        |
| SINE          | Alu           | B1_Mus2 | chr19 | 41608543 41608655 + | 0        | 0.708814 | 0        |
| Simple_repeat | Simple_repeat | (A)n    | chr19 | 41608656 41608682 + | 0        | 0.708814 | 0        |
| SINE          | Alu           | B1_Mus2 | chr19 | 41651768 41651900 + | 0        | 0        | 0.342623 |
| Simple_repeat | Simple_repeat | (A)n    | chr19 | 41651901 41651926 + | 0        | 0.380568 | 0.342623 |
| SINE          | Alu           | B1_Mur4 | chr19 | 41897400 41897552 + | 0        | 0        | 0        |
| Simple_repeat | Simple_repeat | (A)n    | chr19 | 41897553 41897592 + | 0        | 0        | 0        |
| Simple_repeat | Simple_repeat | (A)n    | chr19 | 41904105 41904152 + | 0        | 0        | 0        |
| SINE          | Alu           | B1_Mur3 | chr19 | 41985776 41985909 + | 0        | 0        | 0        |
| Simple_repeat | Simple_repeat | (A)n    | chr19 | 41985910 41985934 + | 0        | 0        | 0        |
| SINE          | Alu           | B1_Mus1 | chr19 | 42231957 42232103 + | 0        | 0        | 0        |
| Simple_repeat | Simple_repeat | (A)n    | chr19 | 42232104 42232131 + | 0.332194 | 0.380568 | 0        |
| SINE          | Alu           | B1_Mm   | chr19 | 43718488 43718631 - | 0        | 0        | 0        |
| LTR           | MaLR          | MTA_Mm  | chr19 | 44914848 44915243 - | 1.16015  | 0        | 0        |
| LTR           | MaLR          | MTA_Mm  | chr19 | 44916601 44916995 - | 0        | 0        | 0        |
| SINE          | Alu           | B1_Mm   | chr19 | 45384107 45384243 - | 0        | 0        | 0        |
| LTR           | MaLR          | MTA_Mm  | chr19 | 45788033 45788427 - | 0        | 0        | 0        |
| SINE          | Alu           | B1_Mus2 | chr19 | 46124381 46124516 + | 0        | 0        | 0        |
| Simple_repeat | Simple_repeat | (A)n    | chr19 | 46124517 46124543 + | 0        | 0        | 0        |
| SINE          | Alu           | B1_Mm   | chr19 | 46199986 46200132 + | 0        | 0        | 0        |



|                |                |         |       |          |            |          |   |          |
|----------------|----------------|---------|-------|----------|------------|----------|---|----------|
| Simple_repeat  | Simple_repeat  | (A)n    | chr19 | 46200133 | 46200170 + | 0        | 0 | 0        |
| SINE           | Alu            | B1_Mus2 | chr19 | 46422425 | 46422570 + | 0        | 0 | 0        |
| Simple_repeat  | Simple_repeat  | (A)n    | chr19 | 46422571 | 46422596 + | 0        | 0 | 0        |
| SINE           | Alu            | B1_Mus2 | chr19 | 46430761 | 46430906 - | 0        | 0 | 0        |
| Simple_repeat  | Simple_repeat  | (A)n    | chr19 | 48883820 | 48883866 + | 0        | 0 | 0        |
| LTR            | MaLR           | MTA_Mm  | chr19 | 49081293 | 49081684 - | 0        | 0 | 0        |
| LTR            | ERVK           | RMER6A  | chr19 | 49400680 | 49401465 - | 0        | 0 | 0        |
| Simple_repeat  | Simple_repeat  | (A)n    | chr19 | 49570268 | 49570304 + | 0        | 0 | 0        |
| Simple_repeat  | Simple_repeat  | (A)n    | chr19 | 49783242 | 49783281 + | 0        | 0 | 0        |
| Simple_repeat  | Simple_repeat  | (A)n    | chr19 | 51439220 | 51439287 + | 0        | 0 | 0        |
| LINE           | L1             | L1Md_T  | chr19 | 51618350 | 51624488 - | 0        | 0 | 0        |
| LTR            | MaLR           | MTA_Mm  | chr19 | 52967003 | 52967384 - | 0        | 0 | 0        |
| SINE           | Alu            | B1_Mm   | chr19 | 53655435 | 53655581 - | 0        | 0 | 0        |
| SINE           | Alu            | B1_Mus2 | chr19 | 53730937 | 53731080 + | 0        | 0 | 0        |
| Simple_repeat  | Simple_repeat  | (A)n    | chr19 | 53731081 | 53731104 + | 0        | 0 | 0        |
| LTR            | ERVK           | RMER19C | chr19 | 54134835 | 54135556 - | 0        | 0 | 0        |
| SINE           | Alu            | B1_Mus2 | chr19 | 54152806 | 54152955 - | 0        | 0 | 0        |
| Simple_repeat  | Simple_repeat  | (A)n    | chr19 | 54253620 | 54253653 + | 0        | 0 | 0        |
| SINE           | Alu            | B1_Mus1 | chr19 | 54581927 | 54582072 + | 0        | 0 | 0        |
| Simple_repeat  | Simple_repeat  | (A)n    | chr19 | 54582073 | 54582096 + | 0        | 0 | 0        |
| SINE           | B4             | B4      | chr19 | 54582609 | 54582942 - | 0        | 0 | 0        |
| SINE           | Alu            | B1_Mm   | chr19 | 56592810 | 56592956 + | 0        | 0 | 0        |
| Simple_repeat  | Simple_repeat  | (A)n    | chr19 | 56592957 | 56593003 + | 0        | 0 | 0        |
| Simple_repeat  | Simple_repeat  | (A)n    | chr19 | 57317526 | 57317556 + | 0        | 0 | 0        |
| SINE           | Alu            | B1_Mm   | chr19 | 57484311 | 57484459 - | 0        | 0 | 0        |
| SINE           | Alu            | B1_Mus1 | chr19 | 58668834 | 58668981 + | 0        | 0 | 0        |
| SINE           | Alu            | B1_Mus2 | chr19 | 58672924 | 58673067 + | 0        | 0 | 0        |
| Simple_repeat  | Simple_repeat  | (A)n    | chr19 | 58673068 | 58673099 + | 0        | 0 | 0        |
| SINE           | Alu            | B1_Mm   | chr19 | 58730706 | 58730852 + | 0        | 0 | 0        |
| Simple_repeat  | Simple_repeat  | (A)n    | chr19 | 58730853 | 58730879 + | 0        | 0 | 0        |
| SINE           | Alu            | B1_Mm   | chr19 | 59254812 | 59254952 + | 0        | 0 | 0        |
| SINE           | Alu            | B1_Mus1 | chr19 | 60448860 | 60449004 - | 0        | 0 | 0        |
| SINE           | Alu            | B1_Mm   | chr19 | 60876199 | 60876335 - | 0        | 0 | 0        |
| SINE           | Alu            | B1_Mus2 | chr19 | 60958032 | 60958180 + | 0        | 0 | 0        |
| Simple_repeat  | Simple_repeat  | (A)n    | chr19 | 60958181 | 60958204 + | 0        | 0 | 0        |
| LTR            | MaLR           | MLT1A   | chr1  | 3158390  | 3158755 +  | 0        | 0 | 0        |
| SINE           | Alu            | B1_Mus1 | chr1  | 3895094  | 3895241 +  | 0        | 0 | 0        |
| Low_complexity | Low_complexity | GA-rich | chr1  | 3895243  | 3895307 +  | 0.591053 | 0 | 0        |
| LTR            | MaLR           | MTA_Mm  | chr1  | 4459694  | 4460087 -  | 0        | 0 | 0        |
| LTR            | MaLR           | MTA_Mm  | chr1  | 5363027  | 5363399 +  | 0        | 0 | 0        |
| SINE           | Alu            | B1_Mm   | chr1  | 5974350  | 5974496 +  | 0        | 0 | 0        |
| LTR            | MaLR           | MTA_Mm  | chr1  | 6118540  | 6118930 +  | 0        | 0 | 0        |
| Simple_repeat  | Simple_repeat  | (A)n    | chr1  | 6166783  | 6166808 +  | 0        | 0 | 0        |
| LTR            | MaLR           | MTA_Mm  | chr1  | 6316887  | 6317281 -  | 0        | 0 | 0        |
| Simple_repeat  | Simple_repeat  | (A)n    | chr1  | 7186902  | 7186942 +  | 0        | 0 | 0        |
| LINE           | L1             | L1Md_T  | chr1  | 7318763  | 7325821 -  | 0        | 0 | 0        |
| Simple_repeat  | Simple_repeat  | (A)n    | chr1  | 7379898  | 7379924 +  | 0        | 0 | 0        |
| SINE           | Alu            | B1_Mus1 | chr1  | 7383886  | 7384024 -  | 0        | 0 | 0        |
| Simple_repeat  | Simple_repeat  | (A)n    | chr1  | 7384121  | 7384170 +  | 0        | 0 | 0        |
| Simple_repeat  | Simple_repeat  | (A)n    | chr10 | 10758043 | 10758047 + | 0        | 0 | 0        |
| Simple_repeat  | Simple_repeat  | (A)n    | chr1  | 7736046  | 7736092 +  | 0        | 0 | 0        |
| SINE           | Alu            | B1_Mus2 | chr1  | 8225645  | 8225791 -  | 0        | 0 | 0        |
| LTR            | MaLR           | MTA_Mm  | chr10 | 13926283 | 13926680 + | 0        | 0 | 1.10507  |
| Simple_repeat  | Simple_repeat  | (A)n    | chr1  | 10280912 | 10281032 + | 0        | 0 | 0        |
| SINE           | Alu            | B1_Mus2 | chr1  | 10743193 | 10743339 - | 0        | 0 | 0        |
| SINE           | Alu            | B1_Mm   | chr1  | 10869851 | 10869944 + | 0        | 0 | 0.342623 |
| Simple_repeat  | Simple_repeat  | (A)n    | chr1  | 10869945 | 10869990 + | 0        | 0 | 0.342623 |
| SINE           | Alu            | B1_Mus1 | chr10 | 10786471 | 10786485 + | 0        | 0 | 0.342623 |
| Simple_repeat  | Simple_repeat  | (A)n    | chr10 | 10786485 | 10786489 + | 0        | 0 | 0.342623 |
| SINE           | Alu            | B1_Mus1 | chr1  | 12076729 | 12076875 - | 0        | 0 | 0.615324 |
| LTR            | MaLR           | MTA_Mm  | chr1  | 12137289 | 12137684 + | 0        | 0 | 0        |
| Simple_repeat  | Simple_repeat  | (A)n    | chr1  | 12213548 | 12213577 + | 0        | 0 | 0        |
| LTR            | MaLR           | MTB     | chr1  | 12214505 | 12214876 + | 0        | 0 | 0        |
| LINE           | L1             | L1_Mus2 | chr1  | 12350343 | 12355914 + | 0        | 0 | 0        |
| LINE           | L1             | L1Md_F2 | chr1  | 12447775 | 12453014 + | 0        | 0 | 0        |
| LTR            | MaLR           | MTA_Mm  | chr1  | 12507060 | 12507455 - | 0        | 0 | 0        |
| LTR            | MaLR           | MTA_Mm  | chr1  | 13024878 | 13025261 - | 0        | 0 | 0        |

|                |                |          |       |                     |          |          |          |
|----------------|----------------|----------|-------|---------------------|----------|----------|----------|
| SINE           | Alu            | B1_Mm    | chr1  | 13438957 13439103 + | 0        | 0        | 0        |
| LTR            | MaLR           | MTA_Mm   | chr1  | 13442647 13443045 - | 0.332194 | 0        | 0        |
| Simple_repeat  | Simple_repeat  | (A)n     | chr1  | 13579979 13580019 + | 0        | 0.380568 | 0        |
| SINE           | Alu            | B1F      | chr1  | 13582238 13582381 - | 0        | 0        | 0        |
| LTR            | MaLR           | MTA_Mm   | chr1  | 13701247 13701641 + | 0        | 0        | 0        |
| LTR            | MaLR           | MTA_Mm   | chr1  | 13712190 13712583 + | 0        | 0        | 0        |
| LTR            | MaLR           | MTA_Mm   | chr1  | 13713683 13714076 + | 0        | 0        | 0        |
| SINE           | Alu            | B1_Mm    | chr1  | 14460313 14460459 - | 0        | 0        | 0        |
| Simple_repeat  | Simple_repeat  | (A)n     | chr1  | 14808372 14808426 + | 0        | 0        | 0        |
| Simple_repeat  | Simple_repeat  | (A)n     | chr1  | 14909142 14909180 + | 0        | 0        | 0        |
| LTR            | MaLR           | MTA_Mm   | chr1  | 14911900 14912289 - | 0        | 0        | 0        |
| Simple_repeat  | Simple_repeat  | (TTTA)n  | chr1  | 15950048 15950108 + | 0        | 0        | 0        |
| SINE           | Alu            | B1_Mus1  | chr1  | 16087059 16087203 + | 0        | 0        | 0        |
| SINE           | Alu            | B1_Mm    | chr1  | 16712179 16712324 - | 0        | 0        | 0        |
| SINE           | Alu            | B1_Mus1  | chr1  | 16842186 16842333 - | 0        | 0        | 0        |
| LINE           | L1             | L1_Mus2  | chr1  | 17128125 17133630 - | 0        | 0        | 0        |
| SINE           | B2             | B2_Mm1t  | chr1  | 17224679 17224871 - | 0.332194 | 0        | 0        |
| Simple_repeat  | Simple_repeat  | (A)n     | chr1  | 17688764 17688804 + | 0        | 0        | 0        |
| LTR            | MaLR           | MTA_Mm   | chr1  | 17701866 17702245 - | 0        | 0        | 0        |
| LINE           | L1             | L1Md_T   | chr1  | 17906212 17912668 - | 0        | 0        | 0        |
| LTR            | MaLR           | MTA_Mm   | chr1  | 17996654 17997047 - | 0        | 0        | 0.342623 |
| SINE           | Alu            | B1_Mus1  | chr1  | 18470778 18470924 + | 0        | 0        | 0        |
| Simple_repeat  | Simple_repeat  | (A)n     | chr1  | 18631436 18631484 + | 0        | 0        | 0        |
| LTR            | MaLR           | MTA_Mm   | chr1  | 18771358 18771724 + | 0        | 0        | 0        |
| LINE           | L1             | L1_Mus1  | chr1  | 18904036 18909923 - | 0        | 0        | 0        |
| LTR            | MaLR           | MTA_Mm   | chr1  | 19014247 19014641 + | 0        | 0        | 0        |
| LINE           | L1             | L1Md_F   | chr1  | 19261551 19266776 + | 0        | 0        | 0        |
| SINE           | Alu            | B1_Mus1  | chr10 | 10871125 10871140 + | 0        | 0        | 0        |
| Low_complexity | Low_complexity | GA-rich  | chr10 | 10871140 10871149 + | 0        | 0        | 0        |
| SINE           | Alu            | B1_Mm    | chr1  | 19532328 19532459 - | 0        | 0        | 0        |
| LTR            | MaLR           | MTA_Mm   | chr1  | 22905052 22905445 + | 0        | 0        | 0        |
| Simple_repeat  | Simple_repeat  | (A)n     | chr1  | 23046296 23046329 + | 0        | 0        | 0        |
| Simple_repeat  | Simple_repeat  | (A)n     | chr1  | 23216073 23216100 + | 0        | 0        | 0        |
| SINE           | Alu            | B1_Mus1  | chr1  | 23227188 23227334 + | 0        | 0        | 0        |
| Simple_repeat  | Simple_repeat  | (CAAAA)n | chr1  | 23227335 23227443 + | 0        | 0        | 0        |
| LTR            | MaLR           | MTA_Mm   | chr1  | 23628441 23628835 + | 0        | 0        | 0        |
| LTR            | MaLR           | MTB      | chr1  | 23724107 23724501 + | 0        | 0        | 0        |
| Simple_repeat  | Simple_repeat  | (A)n     | chr1  | 24892423 24892490 + | 0        | 0        | 0        |
| LTR            | ERVK           | RLTR25A  | chr1  | 24904866 24905869 - | 0        | 0        | 0        |
| SINE           | Alu            | B1_Mm    | chr10 | 14089893 14090035 - | 0        | 0        | 0        |
| SINE           | Alu            | B1_Mm    | chr1  | 25067710 25067856 + | 0        | 0        | 0        |
| Simple_repeat  | Simple_repeat  | (A)n     | chr1  | 25068897 25068927 + | 0        | 0        | 0        |
| Simple_repeat  | Simple_repeat  | (TTTA)n  | chr1  | 25909043 25909065 + | 0.591053 | 0        | 0        |
| Simple_repeat  | Simple_repeat  | (A)n     | chr10 | 14094117 14094187 + | 0        | 0        | 0        |
| LINE           | L1             | L1_Mus3  | chr1  | 26013440 26019720 - | 0        | 0        | 0        |
| SINE           | Alu            | B1_Mm    | chr1  | 26092146 26092292 + | 0        | 0        | 0        |
| SINE           | Alu            | B1_Mus1  | chr1  | 26457791 26457938 - | 0        | 0        | 0        |
| SINE           | Alu            | B1_Mus2  | chr1  | 26801855 26802000 + | 0        | 0        | 0.615324 |
| LINE           | L1             | L1Md_F2  | chr1  | 27047027 27052077 + | 0        | 0        | 0        |
| Simple_repeat  | Simple_repeat  | (A)n     | chr1  | 27246077 27246111 + | 0.332194 | 0        | 0        |
| LTR            | MaLR           | MTA_Mm   | chr10 | 10955646 10955685 - | 7.93678  | 4.15543  | 4.86694  |
| LTR            | MaLR           | MTA_Mm   | chr1  | 27744272 27744665 - | 0        | 0        | 0        |
| Simple_repeat  | Simple_repeat  | (A)n     | chr1  | 28557389 28557422 + | 0        | 0        | 0        |
| LINE           | L1             | L1Md_F   | chr1  | 28571431 28575921 + | 0        | 0        | 0        |
| Simple_repeat  | Simple_repeat  | (A)n     | chr1  | 28685159 28685282 + | 0        | 0        | 0        |
| SINE           | Alu            | B1_Mus2  | chr1  | 28861585 28861731 - | 0        | 0        | 0        |
| Simple_repeat  | Simple_repeat  | (A)n     | chr1  | 29279945 29279975 + | 0        | 0        | 0        |
| Simple_repeat  | Simple_repeat  | (A)n     | chr10 | 10977416 10977419 + | 0        | 0        | 0        |
| SINE           | B2             | B3A      | chr1  | 29833803 29834006 - | 0        | 0        | 0        |
| Simple_repeat  | Simple_repeat  | (A)n     | chr1  | 29971928 29971964 + | 0        | 0        | 0        |
| LTR            | MaLR           | MTA_Mm   | chr1  | 30158936 30159330 - | 0        | 0        | 0        |
| Simple_repeat  | Simple_repeat  | (A)n     | chr1  | 30528675 30528710 + | 0        | 0        | 0        |
| Simple_repeat  | Simple_repeat  | (A)n     | chr1  | 30532249 30532289 + | 0        | 0        | 0        |
| LINE           | L1             | L1Md_T   | chr1  | 30717415 30723900 - | 0        | 0        | 0        |
| SINE           | Alu            | B1_Mus2  | chr1  | 30963441 30963587 + | 0        | 0        | 0        |
| Simple_repeat  | Simple_repeat  | (A)n     | chr1  | 30963588 30963611 + | 0        | 0        | 0        |
| SINE           | Alu            | B1_Mus2  | chr1  | 31669624 31669770 + | 0        | 0        | 0        |

|               |               |         |       |                     |          |          |          |
|---------------|---------------|---------|-------|---------------------|----------|----------|----------|
| Simple_repeat | Simple_repeat | (A)n    | chr1  | 31669771 31669823 + | 0        | 0        | 0        |
| LTR           | MaLR          | MTA_Mm  | chr1  | 31827931 31828326 - | 0        | 0        | 0        |
| LTR           | MaLR          | MTA_Mm  | chr1  | 31829418 31829813 - | 0        | 0        | 0        |
| Simple_repeat | Simple_repeat | (A)n    | chr1  | 32036162 32036198 + | 0        | 0        | 0        |
| LTR           | MaLR          | MTA_Mm  | chr10 | 11010427 11010466 - | 0        | 0        | 0        |
| LTR           | MaLR          | MTA_Mm  | chr10 | 11010576 11010616 - | 0        | 0        | 0        |
| Simple_repeat | Simple_repeat | (A)n    | chr1  | 32804228 32804251 + | 0        | 0        | 0        |
| SINE          | Alu           | B1_Mus2 | chr10 | 11015227 11015241 - | 0        | 0        | 0        |
| SINE          | Alu           | B1_Mus2 | chr1  | 33261708 33261847 - | 0        | 0        | 0        |
| LINE          | L1            | L1_Mus2 | chr1  | 33399530 33405715 + | 0        | 0        | 0        |
| Simple_repeat | Simple_repeat | (A)n    | chr1  | 33801796 33801828 + | 0        | 0        | 0        |
| SINE          | Alu           | PB1D9   | chr1  | 34458705 34458815 - | 0        | 0        | 0        |
| Simple_repeat | Simple_repeat | (A)n    | chr1  | 34797641 34797678 + | 0        | 0        | 0        |
| LTR           | MaLR          | MTA_Mm  | chr1  | 35232788 35233182 - | 0        | 0        | 0        |
| LTR           | MaLR          | MTA_Mm  | chr1  | 35236546 35236942 - | 0        | 0        | 0        |
| LTR           | MaLR          | MTA_Mm  | chr1  | 35319340 35319729 + | 0        | 0        | 0        |
| SINE          | Alu           | B1_Mus1 | chr1  | 35394174 35394317 + | 0        | 0        | 0        |
| Simple_repeat | Simple_repeat | (A)n    | chr1  | 35394318 35394346 + | 0        | 0        | 0        |
| Simple_repeat | Simple_repeat | (A)n    | chr1  | 35756051 35756082 + | 0        | 0        | 0        |
| SINE          | Alu           | B1_Mm   | chr1  | 36079100 36079250 + | 0        | 0        | 0        |
| SINE          | B2            | B2_Mm2  | chr1  | 36101237 36101424 + | 0        | 0        | 0        |
| LTR           | MaLR          | MTB     | chr10 | 11049098 11049138 + | 0        | 0        | 0        |
| SINE          | Alu           | B1_Mur3 | chr1  | 37140556 37140708 - | 0        | 0        | 0        |
| SINE          | Alu           | B1_Mus2 | chr10 | 11054555 11054570 + | 0        | 0        | 0        |
| Simple_repeat | Simple_repeat | (A)n    | chr10 | 11054570 11054576 + | 0        | 0        | 0        |
| SINE          | Alu           | B1_Mus1 | chr1  | 37468941 37469087 - | 0        | 0        | 0        |
| SINE          | Alu           | B1_Mm   | chr10 | 11057331 11057346 + | 0        | 0        | 0        |
| Simple_repeat | Simple_repeat | (A)n    | chr10 | 11057346 11057350 + | 0        | 0        | 0        |
| SINE          | Alu           | B1_Mm   | chr10 | 11059640 11059655 - | 0        | 0        | 0        |
| LINE          | L1            | Lx2B    | chr1  | 37993708 38000000 - | 0        | 0        | 0        |
| LTR           | MaLR          | MTA_Mm  | chr1  | 38037315 38037708 - | 0        | 0        | 0        |
| SINE          | Alu           | B1_Mus2 | chr1  | 38731063 38731208 + | 0        | 0        | 0        |
| Simple_repeat | Simple_repeat | (A)n    | chr1  | 39672535 39672570 + | 0        | 0        | 0        |
| LTR           | MaLR          | MTA_Mm  | chr1  | 40103785 40104179 - | 0        | 0        | 0        |
| LTR           | MaLR          | MTA_Mm  | chr1  | 40105275 40105669 - | 0        | 0        | 0        |
| SINE          | Alu           | B1_Mm   | chr10 | 11079942 11079956 + | 0        | 0        | 0        |
| LTR           | MaLR          | MTA_Mm  | chr1  | 40428697 40429073 + | 0        | 0        | 0        |
| LTR           | MaLR          | MTA_Mm  | chr1  | 40609711 40610109 - | 0        | 0        | 0        |
| Simple_repeat | Simple_repeat | (A)n    | chr1  | 41332932 41333006 + | 0        | 0        | 0        |
| LINE          | L1            | L1Md_F2 | chr1  | 41376983 41381722 - | 0        | 0        | 0        |
| LINE          | L1            | L1Md_F2 | chr10 | 14294518 14300080 - | 0        | 0        | 0.342623 |
| SINE          | Alu           | B1_Mm   | chr10 | 14300081 14300227 - | 0        | 0        | 0.342623 |
| SINE          | Alu           | B1_Mm   | chr10 | 11088394 11088408 - | 0        | 0        | 0        |
| Simple_repeat | Simple_repeat | (A)n    | chr1  | 41867243 41867277 + | 0        | 0        | 0        |
| SINE          | Alu           | B1_Mus1 | chr1  | 41919013 41919159 - | 0        | 0        | 0        |
| SINE          | Alu           | B1_Mus1 | chr1  | 42343155 42343295 - | 0        | 0        | 0        |
| Simple_repeat | Simple_repeat | (A)n    | chr1  | 42768187 42768226 + | 0        | 1.08938  | 0.342623 |
| Simple_repeat | Simple_repeat | (A)n    | chr1  | 42827815 42827843 + | 0        | 0        | 0        |
| LTR           | MaLR          | MTA_Mm  | chr1  | 43001033 43001427 + | 0        | 0        | 0        |
| Simple_repeat | Simple_repeat | (A)n    | chr10 | 11100530 11100533 + | 0        | 0        | 0        |
| SINE          | Alu           | B1_Mus1 | chr1  | 44545194 44545341 + | 0        | 0        | 0        |
| SINE          | B2            | B2_Mm1a | chr1  | 44586160 44586352 - | 0        | 0        | 0        |
| LINE          | L1            | L1Md_F2 | chr1  | 45136138 45142296 - | 0        | 0        | 0        |
| Simple_repeat | Simple_repeat | (A)n    | chr1  | 45884874 45884910 + | 0.591053 | 0        | 0        |
| Simple_repeat | Simple_repeat | (A)n    | chr1  | 45894464 45894513 + | 0        | 0        | 0        |
| LINE          | L1            | L1Md_F2 | chr1  | 46552425 46558574 - | 0        | 0        | 0        |
| SINE          | Alu           | B1_Mm   | chr1  | 46649209 46649354 - | 0        | 0        | 0        |
| SINE          | B2            | B2_Mm1t | chr1  | 46842767 46842959 + | 0        | 0.380568 | 0        |
| SINE          | Alu           | B1_Mus2 | chr1  | 46970938 46971084 + | 0        | 0        | 0        |
| Simple_repeat | Simple_repeat | (A)n    | chr1  | 46971085 46971125 + | 0        | 0        | 0        |
| SINE          | Alu           | B1_Mus1 | chr1  | 47229595 47229743 - | 0        | 0        | 0.342623 |
| SINE          | B2            | B2_Mm1a | chr1  | 47543669 47543857 + | 0        | 0        | 0        |
| Simple_repeat | Simple_repeat | (A)n    | chr1  | 47543858 47543878 + | 0        | 0        | 0        |
| Simple_repeat | Simple_repeat | (A)n    | chr1  | 47702515 47702562 + | 0        | 0        | 0        |
| SINE          | Alu           | B1_Mus1 | chr1  | 48498396 48498541 + | 0        | 0        | 0        |
| Simple_repeat | Simple_repeat | (A)n    | chr1  | 48871131 48871184 + | 0        | 0        | 0        |
| SINE          | Alu           | B1_Mus1 | chr1  | 49248345 49248492 + | 0        | 0        | 0        |

|               |               |         |       |                     |          |          |          |
|---------------|---------------|---------|-------|---------------------|----------|----------|----------|
| Simple_repeat | Simple_repeat | (A)n    | chr1  | 49248493 49248522 + | 0        | 0        | 0        |
| SINE          | Alu           | B1_Mus2 | chr10 | 11148585 11148599 + | 0        | 0        | 0        |
| Simple_repeat | Simple_repeat | (A)n    | chr10 | 11148599 11148602 + | 0        | 0        | 0        |
| LTR           | MaLR          | MTA_Mm  | chr1  | 49316357 49316751 + | 0        | 0        | 0        |
| SINE          | Alu           | B1_Mm   | chr1  | 49708529 49708674 - | 0        | 0        | 0        |
| LTR           | MaLR          | MTA_Mm  | chr1  | 50028698 50029092 - | 0.923247 | 0.380568 | 0.342623 |
| LTR           | MaLR          | MTA_Mm  | chr1  | 50030190 50030584 - | 0        | 0        | 0        |
| Simple_repeat | Simple_repeat | (A)n    | chr1  | 50344401 50344433 + | 0        | 0        | 0        |
| LINE          | L1            | L1Md_F2 | chr1  | 50493795 50499762 - | 0        | 0        | 0        |
| Simple_repeat | Simple_repeat | (A)n    | chr1  | 50684891 50684929 + | 0        | 0        | 0        |
| Simple_repeat | Simple_repeat | (A)n    | chr1  | 51253632 51253666 + | 0        | 0.708814 | 0.342623 |
| SINE          | Alu           | B1_Mus1 | chr10 | 11167123 11167138 + | 0        | 0        | 0        |
| LTR           | MaLR          | MTA_Mm  | chr1  | 52429869 52430264 - | 0        | 0        | 0        |
| SINE          | Alu           | B1_Mus1 | chr1  | 52617115 52617262 - | 0        | 0        | 0        |
| SINE          | Alu           | B1_Mm   | chr1  | 52895859 52896006 - | 0        | 0        | 0        |
| LTR           | MaLR          | MTA_Mm  | chr10 | 11191084 11191124 - | 0        | 0        | 0        |
| SINE          | Alu           | B1_Mus2 | chr1  | 53789066 53789211 + | 0        | 0        | 0        |
| Simple_repeat | Simple_repeat | (A)n    | chr1  | 53789212 53789240 + | 0        | 0        | 0        |
| SINE          | Alu           | B1_Mus2 | chr1  | 55176705 55176851 + | 0        | 0.708814 | 0        |
| Simple_repeat | Simple_repeat | (A)n    | chr1  | 55176852 55176905 + | 0        | 0        | 0        |
| LTR           | MaLR          | MTA_Mm  | chr1  | 56087064 56087458 - | 0        | 0        | 0        |
| LTR           | MaLR          | MTA_Mm  | chr1  | 56088554 56088948 - | 0        | 0        | 0        |
| Simple_repeat | Simple_repeat | (A)n    | chr1  | 57038499 57038545 + | 0        | 0        | 0.342623 |
| LTR           | MaLR          | MTA_Mm  | chr1  | 57165838 57166232 - | 0        | 0        | 0        |
| Simple_repeat | Simple_repeat | (A)n    | chr1  | 57690903 57690938 + | 0.332194 | 0        | 0.342623 |
| SINE          | Alu           | B1_Mus1 | chr10 | 11232431 11232446 + | 0        | 0        | 0        |
| Simple_repeat | Simple_repeat | (A)n    | chr10 | 11232447 11232450 + | 0        | 0        | 0        |
| SINE          | Alu           | PB1D9   | chr1  | 58437743 58437857 - | 0        | 0        | 0        |
| SINE          | Alu           | B1_Mus1 | chr1  | 58688443 58688589 - | 0        | 0        | 0        |
| SINE          | Alu           | B1_Mus2 | chr1  | 58695278 58695422 - | 0        | 0        | 0        |
| SINE          | Alu           | B1_Mus1 | chr1  | 59778547 59778688 - | 0        | 0        | 0        |
| Simple_repeat | Simple_repeat | (A)n    | chr1  | 59785820 59785864 + | 0        | 0        | 0        |
| SINE          | Alu           | B1_Mm   | chr1  | 60103686 60103828 + | 0        | 0        | 0        |
| SINE          | Alu           | B1_Mus2 | chr1  | 60119095 60119241 + | 0        | 0        | 0        |
| Simple_repeat | Simple_repeat | (A)n    | chr1  | 60119242 60119266 + | 0        | 0        | 0        |
| SINE          | Alu           | B1_Mus1 | chr1  | 60210878 60211019 - | 0        | 0        | 0        |
| SINE          | Alu           | B1_Mus1 | chr1  | 60234634 60234780 + | 0        | 0.708814 | 0.342623 |
| Simple_repeat | Simple_repeat | (A)n    | chr1  | 60234781 60234833 + | 0        | 0        | 0.342623 |
| Simple_repeat | Simple_repeat | (A)n    | chr1  | 61573288 61573325 + | 0        | 0.380568 | 0        |
| SINE          | Alu           | B1_Mus1 | chr1  | 63379270 63379417 + | 0        | 0        | 0        |
| Simple_repeat | Simple_repeat | (A)n    | chr1  | 63379422 63379442 + | 0        | 0        | 0        |
| SINE          | Alu           | B1_Mm   | chr1  | 64463532 64463678 - | 0        | 0        | 0        |
| Simple_repeat | Simple_repeat | (A)n    | chr1  | 64574900 64574949 + | 0        | 0        | 0        |
| SINE          | Alu           | B1_Mus2 | chr1  | 64676923 64677068 + | 0        | 0.380568 | 0        |
| SINE          | Alu           | B1_Mm   | chr1  | 65004753 65004921 + | 0        | 0        | 0        |
| SINE          | Alu           | B1_Mm   | chr1  | 65005722 65005867 - | 0        | 0        | 0        |
| SINE          | Alu           | B1_Mm   | chr1  | 65018166 65018313 - | 0        | 0        | 0        |
| Simple_repeat | Simple_repeat | (A)n    | chr10 | 11309956 11309961 + | 0        | 0        | 0        |
| SINE          | Alu           | B1_Mus2 | chr10 | 11312522 11312537 + | 0        | 0        | 0        |
| Simple_repeat | Simple_repeat | (A)n    | chr10 | 11312537 11312541 + | 0        | 0        | 0.342623 |
| LTR           | MaLR          | MTA_Mm  | chr1  | 65989316 65989697 - | 0        | 0        | 0        |
| SINE          | Alu           | B1_Mus1 | chr1  | 67479764 67479910 - | 0        | 0        | 0        |
| LINE          | L1            | Lx      | chr1  | 68034051 68039844 - | 0        | 0        | 0        |
| Simple_repeat | Simple_repeat | (A)n    | chr10 | 11343793 11343797 + | 0        | 0        | 0        |
| Simple_repeat | Simple_repeat | (A)n    | chr10 | 11358143 11358147 + | 0        | 0        | 0.342623 |
| Simple_repeat | Simple_repeat | (A)n    | chr1  | 71582665 71582702 + | 0        | 0        | 0        |
| Simple_repeat | Simple_repeat | (A)n    | chr1  | 71586102 71586135 + | 0        | 0        | 0        |
| Simple_repeat | Simple_repeat | (A)n    | chr1  | 71774368 71774425 + | 0        | 0        | 0        |
| Simple_repeat | Simple_repeat | (A)n    | chr1  | 72473394 72473422 + | 0        | 0        | 0        |
| SINE          | B2            | B2_Mm2  | chr1  | 72750873 72751064 + | 0        | 0        | 0        |
| SINE          | Alu           | B1_Mus2 | chr1  | 72847535 72847681 + | 0        | 0        | 0        |
| Simple_repeat | Simple_repeat | (A)n    | chr1  | 72847682 72847716 + | 0        | 0        | 0        |
| SINE          | Alu           | B1_Mus1 | chr1  | 74231092 74231205 + | 0        | 0        | 0        |
| Simple_repeat | Simple_repeat | (A)n    | chr1  | 74231206 74231229 + | 0        | 0        | 0        |
| SINE          | Alu           | B1_Mus2 | chr1  | 74870171 74870315 + | 0        | 0        | 0        |
| Simple_repeat | Simple_repeat | (A)n    | chr1  | 74870322 74870350 + | 0        | 0        | 0        |
| LTR           | MaLR          | MTA_Mm  | chr1  | 75268033 75268429 + | 0        | 0.708814 | 0.342623 |

|                |                |         |       |                     |          |          |          |
|----------------|----------------|---------|-------|---------------------|----------|----------|----------|
| SINE           | Alu            | B1_Mus2 | chr1  | 75647256 75647392 - | 0        | 0        | 0        |
| LTR            | MaLR           | MTA_Mm  | chr1  | 75834615 75835010 - | 0        | 0        | 0        |
| LTR            | MaLR           | MTA_Mm  | chr1  | 75888599 75888984 - | 0        | 0        | 0        |
| Simple_repeat  | Simple_repeat  | (A)n    | chr10 | 14665430 14665456 + | 0        | 0        | 0        |
| Simple_repeat  | Simple_repeat  | (A)n    | chr1  | 75920600 75920637 + | 0        | 0.380568 | 0        |
| LINE           | L1             | L1Md_F3 | chr1  | 76375361 76381361 - | 0        | 0        | 0        |
| LINE           | L1             | L1VL4   | chr1  | 76513567 76516547 - | 0        | 0        | 0        |
| SINE           | Alu            | B1_Mus2 | chr1  | 76838671 76838803 - | 0        | 0        | 0.615324 |
| Simple_repeat  | Simple_repeat  | (A)n    | chr1  | 77040601 77040639 + | 0        | 0        | 0        |
| LTR            | MaLR           | MTB     | chr1  | 77092600 77092996 + | 0        | 0        | 0        |
| Simple_repeat  | Simple_repeat  | (A)n    | chr10 | 11441380 11441383 + | 0        | 0        | 0        |
| LTR            | MaLR           | MTA_Mm  | chr1  | 77842130 77842535 + | 0        | 0        | 0        |
| Simple_repeat  | Simple_repeat  | (A)n    | chr1  | 77999505 77999543 + | 0        | 0        | 0        |
| SINE           | Alu            | B1_Mm   | chr1  | 78245116 78245261 + | 0        | 0        | 0        |
| Simple_repeat  | Simple_repeat  | (A)n    | chr1  | 78245262 78245287 + | 0        | 0        | 0        |
| LTR            | MaLR           | MTB     | chr1  | 78537264 78537637 + | 0        | 0        | 0        |
| SINE           | Alu            | B1_Mm   | chr1  | 78548664 78548810 + | 0        | 0        | 0        |
| SINE           | Alu            | B1_Mus1 | chr1  | 78604597 78604724 - | 0        | 0        | 0        |
| SINE           | Alu            | B1_Mm   | chr10 | 11451049 11451063 + | 0        | 0        | 0        |
| Simple_repeat  | Simple_repeat  | (A)n    | chr10 | 11451064 11451068 + | 0        | 0        | 0        |
| SINE           | Alu            | B1_Mm   | chr1  | 78630435 78630581 - | 0        | 0        | 0        |
| LTR            | MaLR           | MTA_Mm  | chr1  | 79544362 79544746 + | 0.332194 | 0        | 0        |
| SINE           | Alu            | B1_Mus2 | chr1  | 79695462 79695597 + | 0        | 0        | 0        |
| Simple_repeat  | Simple_repeat  | (A)n    | chr1  | 79695598 79695626 + | 0        | 0        | 0        |
| SINE           | Alu            | B1_Mus1 | chr1  | 80368926 80369071 - | 0        | 0        | 0        |
| Simple_repeat  | Simple_repeat  | (A)n    | chr1  | 80371992 80372031 + | 0        | 0        | 0        |
| Simple_repeat  | Simple_repeat  | (A)n    | chr1  | 80759732 80759770 + | 0        | 0        | 0        |
| SINE           | Alu            | B1_Mur4 | chr1  | 80885014 80885160 - | 0        | 0        | 0        |
| Simple_repeat  | Simple_repeat  | (A)n    | chr1  | 81022049 81022082 + | 0        | 0        | 0        |
| SINE           | Alu            | B1_Mus2 | chr1  | 81037805 81037949 + | 0        | 0        | 0        |
| SINE           | Alu            | B1_Mm   | chr1  | 81802938 81803085 - | 0        | 0        | 0        |
| Simple_repeat  | Simple_repeat  | (A)n    | chr1  | 81845800 81845829 + | 0        | 0        | 0        |
| SINE           | Alu            | B1_Mus1 | chr1  | 82771555 82771702 - | 0        | 0        | 0        |
| SINE           | Alu            | B1_Mus2 | chr1  | 82815080 82815225 + | 0        | 0        | 0        |
| Simple_repeat  | Simple_repeat  | (A)n    | chr1  | 82815226 82815247 + | 0        | 0        | 0        |
| LINE           | L1             | L1Md_T  | chr1  | 83507613 83513485 - | 0.332194 | 0        | 0.342623 |
| SINE           | Alu            | B1_Mus2 | chr10 | 11488503 11488518 - | 0        | 0        | 0        |
| SINE           | Alu            | B1_Mus2 | chr1  | 84286579 84286725 + | 0        | 0        | 0        |
| Simple_repeat  | Simple_repeat  | (A)n    | chr1  | 84286726 84286754 + | 0        | 0        | 0        |
| SINE           | Alu            | B1_Mus2 | chr1  | 85164942 85165087 - | 0        | 0        | 0        |
| Simple_repeat  | Simple_repeat  | (A)n    | chr1  | 85329392 85329429 + | 1.25544  | 1.41763  | 0.342623 |
| SINE           | Alu            | B1_Mus2 | chr1  | 87392031 87392176 - | 0        | 0        | 0        |
| SINE           | Alu            | B1_Mus1 | chr1  | 88328710 88328856 - | 0        | 0        | 0        |
| SINE           | Alu            | B1_Mus1 | chr1  | 88342228 88342376 + | 0        | 0        | 0        |
| Simple_repeat  | Simple_repeat  | (A)n    | chr1  | 88342377 88342403 + | 0.591053 | 0        | 0        |
| SINE           | Alu            | B1_Mus1 | chr1  | 88406560 88406707 + | 0        | 0        | 0.615324 |
| Low_complexity | Low_complexity | GA-rich | chr1  | 88406708 88406784 + | 0        | 0        | 0.615324 |
| SINE           | Alu            | PB1D9   | chr1  | 88417721 88417826 - | 0        | 0        | 0        |
| SINE           | Alu            | B1_Mus2 | chr1  | 89217411 89217557 - | 0        | 0        | 0        |
| LTR            | MaLR           | MTA_Mm  | chr1  | 89513727 89514121 + | 0        | 0        | 0.615324 |
| LTR            | MaLR           | MTA_Mm  | chr1  | 89515215 89515609 + | 0        | 0        | 0.685246 |
| LTR            | MaLR           | MTA_Mm  | chr1  | 89948657 89949051 + | 0        | 0        | 0        |
| SINE           | Alu            | B1_Mm   | chr1  | 90958757 90958903 - | 0        | 0        | 0        |
| SINE           | Alu            | B1_Mus2 | chr1  | 92316637 92316783 - | 0        | 0        | 0        |
| SINE           | Alu            | B1_Mm   | chr1  | 93144220 93144378 - | 0        | 0        | 0.342623 |
| SINE           | Alu            | B1_Mm   | chr1  | 93357799 93357945 - | 0        | 0        | 0        |
| Simple_repeat  | Simple_repeat  | (A)n    | chr1  | 94092247 94092284 + | 0        | 0        | 0        |
| SINE           | Alu            | B1_Mus1 | chr1  | 94329757 94329903 - | 0        | 0        | 0        |
| SINE           | Alu            | B1_Mus1 | chr1  | 94330038 94330185 + | 0        | 0        | 0        |
| Simple_repeat  | Simple_repeat  | (A)n    | chr1  | 94330186 94330212 + | 0        | 0        | 0        |
| SINE           | Alu            | B1_Mur4 | chr1  | 94869199 94869348 - | 0        | 0        | 0        |
| SINE           | Alu            | B1_Mus1 | chr1  | 95551990 95552137 - | 0        | 0        | 0        |
| SINE           | Alu            | PB1D7   | chr1  | 95576725 95576831 - | 0        | 0        | 0        |
| Simple_repeat  | Simple_repeat  | (A)n    | chr1  | 95787570 95787604 + | 0        | 0        | 0        |
| Simple_repeat  | Simple_repeat  | (A)n    | chr1  | 96496164 96496219 + | 0        | 0        | 0        |
| SINE           | Alu            | B1_Mus2 | chr1  | 96700005 96700150 + | 0        | 0        | 0        |
| Simple_repeat  | Simple_repeat  | (A)n    | chr1  | 96700151 96700191 + | 0        | 0        | 0        |

|               |               |         |       |                     |          |         |          |
|---------------|---------------|---------|-------|---------------------|----------|---------|----------|
| LINE          | L1            | L1Md_F  | chr1  | 97242919 97247255 + | 0        | 0       | 0.342623 |
| Simple_repeat | Simple_repeat | (A)n    | chr1  | 97360974 97361013 + | 0        | 0       | 0        |
| LINE          | L1            | L1Md_T  | chr1  | 97407974 97414683 - | 0        | 0       | 0        |
| SINE          | Alu           | B1_Mus1 | chr1  | 97978262 97978402 - | 0        | 0       | 0        |
| Simple_repeat | Simple_repeat | (A)n    | chr1  | 99476851 99476885 + | 0.332194 | 0       | 0        |
| Simple_repeat | Simple_repeat | (A)n    | chr1  | 10120414 10120420 + | 0        | 0       | 0        |
| SINE          | Alu           | B1_Mus2 | chr1  | 10121164 10121179 - | 0        | 0       | 0        |
| LINE          | L1            | L1Md_F  | chr1  | 10126110 10126658 - | 0        | 0       | 0        |
| Simple_repeat | Simple_repeat | (A)n    | chr1  | 10163186 10163192 + | 0        | 0       | 0        |
| Simple_repeat | Simple_repeat | (A)n    | chr1  | 10253237 10253241 + | 0        | 0       | 0.342623 |
| SINE          | Alu           | B1_Mm   | chr1  | 10280856 10280871 + | 0        | 0       | 0        |
| Simple_repeat | Simple_repeat | (A)n    | chr1  | 10280871 10280873 + | 0        | 0       | 0        |
| Simple_repeat | Simple_repeat | (A)n    | chr1  | 10291367 10291376 + | 0        | 0       | 0        |
| Simple_repeat | Simple_repeat | (A)n    | chr1  | 10292913 10292918 + | 0        | 0       | 0        |
| SINE          | Alu           | B1_Mm   | chr1  | 10315447 10315462 + | 0        | 0       | 0        |
| Simple_repeat | Simple_repeat | (A)n    | chr1  | 10315462 10315464 + | 0        | 0       | 0        |
| LINE          | L1            | L1Md_F2 | chr1  | 10393977 10394614 - | 0        | 0       | 0        |
| SINE          | Alu           | B1_Mus1 | chr1  | 10396751 10396766 + | 0        | 0       | 0        |
| Simple_repeat | Simple_repeat | (A)n    | chr1  | 10396766 10396772 + | 0        | 0       | 0        |
| LINE          | L1            | L1Md_F3 | chr1  | 10397622 10398130 + | 0        | 0       | 0.615324 |
| Simple_repeat | Simple_repeat | (A)n    | chr1  | 10478708 10478717 + | 0        | 0       | 0        |
| SINE          | Alu           | B1_Mus1 | chr1  | 10481710 10481724 + | 0        | 0       | 0        |
| Simple_repeat | Simple_repeat | (A)n    | chr1  | 10481724 10481730 + | 0        | 0       | 0        |
| LTR           | MaLR          | MTA_Mm  | chr10 | 11662319 11662358 + | 0        | 0       | 0        |
| Simple_repeat | Simple_repeat | (A)n    | chr1  | 10509100 10509105 + | 0        | 0       | 0        |
| Simple_repeat | Simple_repeat | (A)n    | chr1  | 10523012 10523015 + | 0        | 0       | 0        |
| SINE          | Alu           | B1_Mus1 | chr10 | 11664588 11664601 + | 0.332194 | 0       | 0        |
| Simple_repeat | Simple_repeat | (A)n    | chr10 | 11664601 11664604 + | 0        | 0       | 0        |
| SINE          | Alu           | B1_Mus1 | chr1  | 10564359 10564374 - | 0        | 0       | 0        |
| SINE          | B2            | B2_Mm1t | chr10 | 11675181 11675198 - | 0        | 0       | 0        |
| SINE          | Alu           | B1_Mus2 | chr10 | 11675201 11675215 - | 0        | 0       | 0        |
| SINE          | Alu           | B1_Mus1 | chr1  | 10708863 10708876 - | 0        | 0       | 0        |
| Simple_repeat | Simple_repeat | (A)n    | chr1  | 10714107 10714111 + | 0        | 0       | 0        |
| SINE          | Alu           | B1_Mus2 | chr10 | 11688358 11688372 - | 0        | 0       | 0        |
| scRNA         | scRNA         | 4.5SRNA | chr1  | 10890147 10890156 - | 0        | 1.01984 | 0        |
| SINE          | Alu           | B1_Mus2 | chr1  | 10909839 10909854 - | 0        | 0       | 0        |
| LINE          | L1            | L1Md_T  | chr1  | 10909929 10910613 - | 0        | 0       | 0        |
| Simple_repeat | Simple_repeat | (A)n    | chr1  | 10930568 10930572 + | 0        | 0       | 0        |
| Simple_repeat | Simple_repeat | (A)n    | chr1  | 10973940 10973944 + | 0        | 0       | 0        |
| LTR           | MaLR          | MTB     | chr10 | 11694408 11694447 - | 0        | 0       | 0        |
| Simple_repeat | Simple_repeat | (A)n    | chr1  | 10995290 10995293 + | 0        | 0       | 0        |
| LINE          | L1            | L1Md_F2 | chr1  | 11029331 11029905 - | 0        | 0       | 0        |
| SINE          | Alu           | B1_Mm   | chr1  | 11060952 11060965 - | 0        | 0       | 0        |
| Simple_repeat | Simple_repeat | (A)n    | chr1  | 11085281 11085283 + | 0        | 0       | 0        |
| Simple_repeat | Simple_repeat | (A)n    | chr1  | 11109373 11109377 + | 0        | 0       | 0        |
| SINE          | Alu           | B1_Mus2 | chr1  | 11132066 11132081 + | 0        | 0       | 0        |
| Simple_repeat | Simple_repeat | (A)n    | chr1  | 11132081 11132083 + | 0        | 0       | 0        |
| LTR           | MaLR          | MTA_Mm  | chr1  | 11143826 11143866 - | 0        | 0       | 0        |
| LTR           | MaLR          | MTA_Mm  | chr1  | 11144024 11144063 - | 0        | 0       | 0        |
| Simple_repeat | Simple_repeat | (A)n    | chr1  | 11205179 11205186 + | 0        | 0       | 0        |
| SINE          | Alu           | B1_Mus1 | chr1  | 11223710 11223724 + | 0        | 0       | 0        |
| Simple_repeat | Simple_repeat | (A)n    | chr1  | 11238147 11238150 + | 0        | 0       | 0        |
| SINE          | Alu           | B1_Mus2 | chr1  | 11295658 11295673 - | 0        | 0       | 0        |
| SINE          | Alu           | B1_Mm   | chr1  | 11297351 11297365 - | 0        | 0       | 0        |
| SINE          | Alu           | B1_Mus1 | chr1  | 11304918 11304933 - | 0        | 0       | 0        |
| Simple_repeat | Simple_repeat | (A)n    | chr1  | 11322190 11322197 + | 0        | 0       | 0        |
| Simple_repeat | Simple_repeat | (GAAA)n | chr1  | 11323865 11323873 + | 0        | 0       | 0        |
| LINE          | L1            | L1_Mus1 | chr1  | 11325896 11326511 - | 0        | 0       | 0        |
| SINE          | Alu           | B1_Mus2 | chr10 | 11714975 11714989 + | 0        | 0       | 0        |
| Simple_repeat | Simple_repeat | (A)n    | chr1  | 11334748 11334753 + | 0        | 0       | 0        |
| LINE          | L1            | L1Md_A  | chr1  | 11335729 11336255 + | 0        | 0       | 0        |
| SINE          | Alu           | B1_Mus2 | chr10 | 11715763 11715777 - | 0        | 0       | 0        |
| SINE          | Alu           | B1_Mm   | chr10 | 11715923 11715938 + | 0.332194 | 0       | 0        |
| Simple_repeat | Simple_repeat | (A)n    | chr10 | 11715938 11715940 + | 0        | 0       | 0        |
| SINE          | Alu           | B1_Mus2 | chr1  | 11391113 11391127 - | 0        | 0       | 0        |
| SINE          | Alu           | B1_Mm   | chr1  | 11396307 11396321 - | 0        | 0       | 0        |
| Simple_repeat | Simple_repeat | (A)n    | chr1  | 11485948 11485954 + | 0        | 0       | 0        |

|               |               |          |       |                     |          |          |          |
|---------------|---------------|----------|-------|---------------------|----------|----------|----------|
| LINE          | L1            | L1_Mus2  | chr1  | 11488659 11489231 + | 0        | 0        | 0        |
| LTR           | MaLR          | MTA_Mm   | chr1  | 11539049 11539089 - | 0        | 0        | 0        |
| Simple_repeat | Simple_repeat | (A)n     | chr1  | 11576142 11576145 + | 0        | 0        | 0        |
| LINE          | L1            | L1Md_F3  | chr1  | 11628967 11629584 - | 0        | 0        | 0        |
| Simple_repeat | Simple_repeat | (A)n     | chr1  | 11637803 11637809 + | 0        | 0        | 0        |
| LTR           | ERV_L         | RMER15   | chr1  | 11641217 11641273 + | 0        | 0        | 0        |
| SINE          | Alu           | B1_Mus2  | chr1  | 11654815 11654829 + | 0        | 0        | 0        |
| Simple_repeat | Simple_repeat | (A)n     | chr1  | 11654829 11654833 + | 0.332194 | 0        | 0        |
| SINE          | Alu           | B1_Mus1  | chr1  | 11671479 11671493 + | 0        | 0        | 0        |
| Simple_repeat | Simple_repeat | (A)n     | chr1  | 11671493 11671496 + | 0        | 0        | 0        |
| SINE          | Alu           | B1_Mus2  | chr1  | 11679012 11679026 + | 0        | 0        | 0        |
| Simple_repeat | Simple_repeat | (A)n     | chr1  | 11679026 11679029 + | 0        | 0        | 0        |
| SINE          | Alu           | B1_Mus1  | chr1  | 11700889 11700904 - | 0        | 0        | 0        |
| LINE          | L1            | Lx       | chr1  | 11745692 11746279 + | 0        | 0        | 0        |
| Simple_repeat | Simple_repeat | (TTTA)n  | chr1  | 11755369 11755372 + | 0        | 0        | 0        |
| LTR           | MaLR          | MTB      | chr10 | 11748531 11748571 - | 0        | 0        | 0        |
| LTR           | MaLR          | MTA_Mm   | chr1  | 11848686 11848725 + | 0        | 0        | 0        |
| SINE          | Alu           | B1_Mus2  | chr1  | 11864350 11864365 + | 0.591053 | 0.380568 | 0        |
| Simple_repeat | Simple_repeat | (A)n     | chr1  | 11864365 11864367 + | 0.591053 | 0.380568 | 0        |
| LTR           | MaLR          | MTA_Mm   | chr1  | 11870243 11870283 + | 0        | 0        | 0        |
| SINE          | Alu           | B1_Mus2  | chr1  | 11872334 11872349 + | 0        | 0.708814 | 0        |
| Simple_repeat | Simple_repeat | (A)n     | chr1  | 11884649 11884652 + | 0        | 0        | 0        |
| LINE          | L1            | L1_Mus1  | chr1  | 11979934 11980445 + | 0        | 0        | 0        |
| SINE          | Alu           | B1_Mm    | chr1  | 12051677 12051690 - | 0        | 0        | 0        |
| Simple_repeat | Simple_repeat | (A)n     | chr1  | 12130500 12130503 + | 0        | 0        | 0        |
| Simple_repeat | Simple_repeat | (A)n     | chr1  | 12234005 12234009 + | 0        | 0        | 0        |
| Simple_repeat | Simple_repeat | (A)n     | chr1  | 12332727 12332729 + | 0.591053 | 0        | 0        |
| LINE          | L1            | L1Md_F2  | chr1  | 12362083 12362613 + | 0        | 0        | 0        |
| SINE          | Alu           | B1_Mm    | chr1  | 12385738 12385751 + | 0        | 0        | 0.342623 |
| Simple_repeat | Simple_repeat | (A)n     | chr1  | 12385751 12385757 + | 0        | 0        | 0        |
| SINE          | Alu           | B1_Mm    | chr1  | 12394364 12394379 - | 0        | 0        | 0        |
| SINE          | Alu           | B1_Mus1  | chr1  | 12423698 12423709 + | 0        | 0        | 0        |
| Simple_repeat | Simple_repeat | (GAAAA)n | chr1  | 12423709 12423718 + | 0        | 0        | 0        |
| SINE          | Alu           | B1_Mm    | chr1  | 12440453 12440468 - | 0        | 0        | 0        |
| SINE          | Alu           | B1_Mus2  | chr10 | 11827377 11827391 - | 0        | 0        | 0        |
| Simple_repeat | Simple_repeat | (A)n     | chr1  | 12449961 12449966 + | 0        | 0        | 0        |
| LTR           | MaLR          | MTA_Mm   | chr1  | 12450786 12450825 + | 0        | 0        | 0.615324 |
| Simple_repeat | Simple_repeat | (A)n     | chr1  | 12595714 12595717 + | 0        | 0        | 0        |
| SINE          | Alu           | B1_Mus1  | chr1  | 12680749 12680763 + | 0        | 0        | 0        |
| SINE          | Alu           | B1_Mus2  | chr1  | 12739253 12739268 + | 0        | 0        | 0        |
| Simple_repeat | Simple_repeat | (A)n     | chr1  | 12739268 12739272 + | 0        | 0        | 0.342623 |
| LTR           | MaLR          | MTB_Mm   | chr10 | 11868676 11868717 + | 0        | 0        | 0        |
| LTR           | MaLR          | MTB      | chr10 | 11873989 11874028 - | 0        | 0        | 0        |
| LTR           | MaLR          | MTA_Mm   | chr10 | 4328933 4329328 -   | 0        | 0        | 0        |
| Simple_repeat | Simple_repeat | (A)n     | chr10 | 11877148 11877152 + | 0        | 0        | 0        |
| LTR           | MaLR          | MTA_Mm   | chr1  | 13013734 13013773 - | 0        | 0        | 0        |
| SINE          | Alu           | B1_Mm    | chr1  | 13032274 13032289 - | 0        | 0        | 0        |
| LTR           | MaLR          | MTA_Mm   | chr1  | 13108106 13108145 - | 0        | 0        | 0        |
| LTR           | MaLR          | MTA_Mm   | chr1  | 13108255 13108294 - | 0        | 0        | 0        |
| LTR           | MaLR          | MTA_Mm   | chr1  | 13232685 13232724 + | 0        | 0        | 0        |
| SINE          | Alu           | B1_Mm    | chr1  | 13384750 13384764 - | 0        | 0        | 0        |
| SINE          | Alu           | B1_Mus1  | chr1  | 13388301 13388316 - | 0        | 0        | 0        |
| SINE          | Alu           | B1_Mus2  | chr1  | 13397016 13397030 + | 0        | 0        | 0        |
| Simple_repeat | Simple_repeat | (A)n     | chr1  | 13397030 13397038 + | 0        | 0        | 0        |
| Simple_repeat | Simple_repeat | (A)n     | chr1  | 13404887 13404891 + | 0        | 0        | 0        |
| SINE          | B2            | B3       | chr1  | 13538516 13538533 - | 0        | 0        | 0.342623 |
| SINE          | Alu           | B1_Mus2  | chr1  | 13556225 13556239 + | 0        | 0        | 0        |
| LTR           | MaLR          | ORR1C2   | chr1  | 13556241 13556273 + | 0        | 0        | 0        |
| SINE          | Alu           | B1_Mus2  | chr1  | 13594823 13594838 + | 0        | 0        | 0        |
| Simple_repeat | Simple_repeat | (A)n     | chr1  | 13594838 13594842 + | 0        | 0        | 0        |
| SINE          | B2            | B3A      | chr1  | 13605945 13605962 + | 0        | 0        | 0        |
| LTR           | MaLR          | MTA_Mm   | chr1  | 13606228 13606267 - | 0        | 0        | 0        |
| SINE          | Alu           | B1_Mm    | chr1  | 13614407 13614421 - | 0        | 0        | 0        |
| SINE          | Alu           | B1_Mus2  | chr1  | 13642916 13642931 + | 0        | 0        | 0        |
| Simple_repeat | Simple_repeat | (A)n     | chr1  | 13642931 13642933 + | 0        | 0        | 0        |
| SINE          | Alu           | B1_Mus2  | chr10 | 11973053 11973067 + | 0        | 0        | 0        |
| SINE          | Alu           | B1_Mus2  | chr1  | 13708823 13708838 - | 0        | 0        | 0        |

|                |                |                |       |          |          |   |          |          |          |
|----------------|----------------|----------------|-------|----------|----------|---|----------|----------|----------|
| SINE           | Alu            | B1_Mm          | chr1  | 13718184 | 13718198 | - | 0        | 0        | 0        |
| SINE           | Alu            | B1_Mus2        | chr10 | 11992208 | 11992222 | + | 0        | 0        | 0        |
| Simple_repeat  | Simple_repeat  | (A)n           | chr10 | 11992222 | 11992229 | + | 0        | 0        | 0        |
| SINE           | Alu            | B1_Mm          | chr10 | 11995171 | 11995185 | - | 0        | 0        | 0        |
| SINE           | Alu            | B1_Mm          | chr1  | 13850821 | 13850836 | - | 0        | 0        | 0        |
| SINE           | Alu            | B1_Mus2        | chr1  | 13854444 | 13854459 | - | 0        | 0        | 0        |
| SINE           | Alu            | B1_Mus1        | chr1  | 13859194 | 13859208 | - | 0        | 0        | 0        |
| LTR            | MaLR           | MTA_Mm         | chr1  | 13864657 | 13864695 | + | 0        | 0        | 0        |
| Simple_repeat  | Simple_repeat  | (A)n           | chr1  | 13864884 | 13864888 | + | 0        | 0        | 0        |
| SINE           | Alu            | B1_Mus1        | chr10 | 11998611 | 11998626 | + | 0        | 0        | 0        |
| Simple_repeat  | Simple_repeat  | (A)n           | chr10 | 11998626 | 11998629 | + | 0.332194 | 0        | 0        |
| Simple_repeat  | Simple_repeat  | (A)n           | chr10 | 12000377 | 12000380 | + | 0        | 0        | 0        |
| LINE           | L1             | L1Md_T         | chr1  | 13923543 | 13924208 | - | 0        | 0        | 0        |
| SINE           | Alu            | B1_Mus2        | chr10 | 12004878 | 12004892 | - | 0        | 0        | 0        |
| Simple_repeat  | Simple_repeat  | (A)n           | chr1  | 13951629 | 13951632 | + | 0        | 0        | 0        |
| SINE           | Alu            | B1_Mus2        | chr1  | 13983178 | 13983192 | + | 1.5143   | 0.708814 | 0.615324 |
| Simple_repeat  | Simple_repeat  | (A)n           | chr1  | 13983192 | 13983194 | + | 1.25544  | 0.708814 | 1.23065  |
| LINE           | L1             | L1Md_T         | chr1  | 14020199 | 14020893 | - | 0        | 0        | 0        |
| SINE           | Alu            | B1_Mus2        | chr1  | 14079966 | 14079981 | - | 0        | 0        | 0        |
| LTR            | MaLR           | MTA_Mm         | chr10 | 12017468 | 12017507 | + | 0        | 0        | 0        |
| Simple_repeat  | Simple_repeat  | (A)n           | chr10 | 12019818 | 12019823 | + | 0        | 0        | 0        |
| LTR            | MaLR           | MTA_Mm         | chr1  | 14146380 | 14146421 | + | 0        | 0        | 0        |
| Simple_repeat  | Simple_repeat  | (A)n           | chr1  | 14181060 | 14181064 | + | 0        | 0        | 0        |
| Simple_repeat  | Simple_repeat  | (A)n           | chr1  | 14181968 | 14181973 | + | 0        | 0        | 0        |
| SINE           | Alu            | B1_Mur4        | chr1  | 14296440 | 14296453 | + | 0        | 0        | 0        |
| Simple_repeat  | Simple_repeat  | (A)n           | chr1  | 14296453 | 14296456 | + | 0        | 0        | 0        |
| SINE           | Alu            | B1_Mus2        | chr1  | 14328887 | 14328901 | - | 0        | 0        | 0        |
| LTR            | MaLR           | MTA_Mm         | chr1  | 14364799 | 14364839 | - | 0        | 0        | 0        |
| LTR            | MaLR           | MTA_Mm         | chr1  | 14364948 | 14364988 | - | 0        | 0        | 0        |
| SINE           | Alu            | B1_Mus2        | chr10 | 12042584 | 12042599 | + | 0        | 0        | 0        |
| Low_complexity | Low_complexity | A-rich         | chr10 | 12042599 | 12042603 | + | 0        | 0        | 0        |
| SINE           | Alu            | B1_Mus1        | chr1  | 14395316 | 14395331 | - | 0        | 0        | 0        |
| LINE           | L1             | L1MA4          | chr1  | 14424562 | 14425024 | - | 0        | 0        | 0        |
| SINE           | Alu            | B1_Mm          | chr1  | 14472084 | 14472099 | - | 0        | 0        | 0        |
| Simple_repeat  | Simple_repeat  | (A)n           | chr1  | 14496056 | 14496059 | + | 0        | 0        | 0        |
| LINE           | L1             | L1Md_F2        | chr1  | 14513118 | 14513640 | + | 0        | 0        | 0        |
| Simple_repeat  | Simple_repeat  | (A)n           | chr1  | 14540217 | 14540221 | + | 0        | 0        | 0        |
| SINE           | Alu            | B1_Mm          | chr1  | 14607830 | 14607845 | - | 0        | 0        | 0        |
| SINE           | Alu            | B1_Mm          | chr1  | 14633201 | 14633215 | - | 0        | 0        | 0        |
| LTR            | MaLR           | MTA_Mm         | chr1  | 14655686 | 14655725 | - | 0        | 0        | 0        |
| LTR            | ERVK           | MYSERV16_l-int | chr1  | 14663571 | 14663778 | - | 0        | 0        | 0        |
| LTR            | MaLR           | MTA_Mm         | chr1  | 14669456 | 14669495 | + | 0        | 0        | 0        |
| LTR            | MaLR           | MTA_Mm         | chr10 | 15516148 | 15516547 | - | 0        | 0        | 0        |
| SINE           | Alu            | B1_Mm          | chr1  | 14738447 | 14738459 | - | 0        | 0        | 0        |
| LTR            | MaLR           | MTA_Mm         | chr1  | 14743159 | 14743198 | + | 0        | 0        | 0.342623 |
| LTR            | MaLR           | MTA_Mm         | chr1  | 14825875 | 14825915 | - | 0        | 0        | 0.615324 |
| LTR            | MaLR           | MTA_Mm         | chr1  | 14883835 | 14883873 | - | 0        | 0        | 0        |
| LTR            | MaLR           | MTA_Mm         | chr10 | 12084294 | 12084333 | - | 0        | 0        | 0        |
| Simple_repeat  | Simple_repeat  | (A)n           | chr1  | 14973345 | 14973348 | + | 0        | 0        | 0        |
| Simple_repeat  | Simple_repeat  | (A)n           | chr1  | 14989865 | 14989868 | + | 0        | 0        | 0        |
| LTR            | MaLR           | MTA_Mm         | chr1  | 15015908 | 15015948 | - | 0        | 0        | 0        |
| SINE           | Alu            | B1_Mus2        | chr1  | 15115082 | 15115097 | + | 0        | 0        | 0        |
| Simple_repeat  | Simple_repeat  | (A)n           | chr1  | 15115097 | 15115106 | + | 0        | 0        | 0        |
| LTR            | MaLR           | MTA_Mm         | chr1  | 15115192 | 15115230 | - | 0        | 0        | 0        |
| SINE           | Alu            | B1_Mus2        | chr1  | 15120184 | 15120199 | + | 0        | 0        | 0        |
| Simple_repeat  | Simple_repeat  | (A)n           | chr1  | 15120199 | 15120202 | + | 0        | 0        | 0        |
| Simple_repeat  | Simple_repeat  | (A)n           | chr1  | 15155955 | 15155959 | + | 0        | 0        | 0        |
| SINE           | Alu            | B1_Mm          | chr10 | 12097639 | 12097654 | + | 0        | 0        | 0        |
| Simple_repeat  | Simple_repeat  | (A)n           | chr10 | 12097654 | 12097657 | + | 0        | 0        | 0        |
| LINE           | L1             | L1Md_F3        | chr1  | 15184503 | 15184952 | + | 0.332194 | 0        | 0        |
| Simple_repeat  | Simple_repeat  | (A)n           | chr1  | 15186650 | 15186654 | + | 0        | 0        | 0        |
| Simple_repeat  | Simple_repeat  | (A)n           | chr1  | 15208674 | 15208679 | + | 0        | 0        | 0        |
| SINE           | Alu            | B1_Mus2        | chr1  | 15314533 | 15314547 | + | 0        | 0        | 0        |
| Simple_repeat  | Simple_repeat  | (A)n           | chr1  | 15314547 | 15314550 | + | 0        | 0        | 0        |
| SINE           | Alu            | B1_Mus2        | chr1  | 15338097 | 15338111 | + | 0        | 0        | 0        |
| Simple_repeat  | Simple_repeat  | (A)n           | chr1  | 15338111 | 15338115 | + | 0        | 0        | 0        |
| SINE           | Alu            | B1_Mus1        | chr1  | 15423440 | 15423454 | + | 0        | 0        | 0        |



|               |               |         |       |          |            |          |          |          |
|---------------|---------------|---------|-------|----------|------------|----------|----------|----------|
| Simple_repeat | Simple_repeat | (A)n    | chr1  | 15423455 | 15423457 + | 0        | 0        | 0        |
| SINE          | Alu           | B1_Mus2 | chr1  | 15477272 | 15477287 - | 0        | 0        | 0        |
| SINE          | Alu           | B1_Mm   | chr1  | 15518605 | 15518620 + | 0        | 0        | 0        |
| SINE          | Alu           | B1_Mus1 | chr1  | 15521264 | 15521278 + | 0        | 0        | 0        |
| Simple_repeat | Simple_repeat | (A)n    | chr1  | 15521279 | 15521283 + | 0        | 0        | 0        |
| SINE          | Alu           | B1_Mus1 | chr1  | 15523166 | 15523179 - | 0        | 0        | 0        |
| SINE          | Alu           | B1_Mm   | chr1  | 15534755 | 15534770 + | 0.591053 | 0        | 0        |
| Simple_repeat | Simple_repeat | (A)n    | chr1  | 15534770 | 15534772 + | 0        | 0        | 0        |
| SINE          | Alu           | B1_Mm   | chr1  | 15540089 | 15540103 - | 0        | 0        | 0        |
| SINE          | Alu           | B1_Mus1 | chr1  | 15549467 | 15549482 - | 0        | 0        | 0        |
| SINE          | Alu           | B1_Mm   | chr1  | 15581492 | 15581507 + | 0        | 0        | 0        |
| Simple_repeat | Simple_repeat | (A)n    | chr1  | 15581507 | 15581509 + | 0        | 0        | 0        |
| LINE          | L1            | L1Md_T  | chr10 | 15610249 | 15616584 - | 0        | 0        | 0        |
| SINE          | Alu           | B1_Mus1 | chr1  | 15709574 | 15709588 - | 0        | 0        | 0        |
| SINE          | Alu           | B1_Mus1 | chr1  | 15710966 | 15710980 - | 0        | 0.708814 | 0        |
| SINE          | Alu           | B1_Mm   | chr1  | 15736029 | 15736044 + | 0.332194 | 0        | 0        |
| Simple_repeat | Simple_repeat | (A)n    | chr1  | 15736044 | 15736047 + | 0.332194 | 0        | 0        |
| SINE          | B2            | B3      | chr1  | 15736047 | 15736064 + | 0.332194 | 0        | 0        |
| SINE          | Alu           | B1_Mm   | chr1  | 15737106 | 15737121 - | 0        | 0        | 0        |
| LTR           | MaLR          | MTA_Mm  | chr1  | 15782503 | 15782543 - | 0        | 0        | 0        |
| SINE          | Alu           | B1_Mus1 | chr1  | 15783568 | 15783582 - | 0        | 0        | 0        |
| SINE          | Alu           | B1_Mus2 | chr1  | 15818059 | 15818073 + | 0        | 0        | 0        |
| Simple_repeat | Simple_repeat | (A)n    | chr1  | 15818074 | 15818076 + | 0        | 0        | 0        |
| SINE          | B2            | B2_Mm1a | chr1  | 15845290 | 15845309 - | 0        | 0        | 0        |
| SINE          | Alu           | B1_Mus2 | chr1  | 15848166 | 15848180 - | 0        | 0        | 0        |
| SINE          | Alu           | B1_Mm   | chr1  | 15873126 | 15873141 - | 0        | 0        | 0        |
| SINE          | B2            | B2_Mm1a | chr1  | 15887296 | 15887315 - | 0        | 0        | 0        |
| SINE          | Alu           | B1_Mm   | chr1  | 15887628 | 15887642 + | 0        | 0        | 0        |
| SINE          | Alu           | B1_Mus2 | chr1  | 16320040 | 16320054 + | 0        | 0        | 0        |
| Simple_repeat | Simple_repeat | (A)n    | chr1  | 16320054 | 16320056 + | 0        | 0        | 0        |
| LTR           | MaLR          | MTA_Mm  | chr1  | 16348587 | 16348626 - | 0        | 0        | 0        |
| LTR           | MaLR          | MTA_Mm  | chr1  | 16359025 | 16359061 + | 0.332194 | 0        | 0        |
| SINE          | B2            | B2_Mm1t | chr1  | 16381962 | 16381981 - | 0        | 0        | 0        |
| SINE          | Alu           | B1_Mus1 | chr1  | 16384561 | 16384575 - | 0        | 0        | 0        |
| Simple_repeat | Simple_repeat | (A)n    | chr1  | 16391583 | 16391587 + | 0        | 0        | 0        |
| LTR           | MaLR          | MTA_Mm  | chr1  | 16603060 | 16603099 - | 0        | 0        | 0        |
| SINE          | Alu           | B1_Mus2 | chr1  | 16644782 | 16644796 + | 0        | 0        | 0        |
| Simple_repeat | Simple_repeat | (A)n    | chr1  | 16644797 | 16644799 + | 0        | 0        | 0        |
| Simple_repeat | Simple_repeat | (A)n    | chr1  | 16650788 | 16650792 + | 0        | 0.380568 | 0.342623 |
| SINE          | Alu           | B1_Mm   | chr1  | 16719420 | 16719437 - | 0        | 0        | 0        |
| SINE          | Alu           | B1_Mm   | chr1  | 16826711 | 16826726 + | 0        | 0        | 0        |
| Simple_repeat | Simple_repeat | (A)n    | chr1  | 16826726 | 16826728 + | 0        | 0        | 0        |
| SINE          | Alu           | B1_Mus1 | chr10 | 12264241 | 12264255 + | 0        | 0        | 0        |
| Simple_repeat | Simple_repeat | (A)n    | chr10 | 12264256 | 12264258 + | 0        | 0        | 0        |
| Simple_repeat | Simple_repeat | (A)n    | chr1  | 16878946 | 16878949 + | 0        | 0        | 0        |
| Simple_repeat | Simple_repeat | (A)n    | chr1  | 16908306 | 16908308 + | 0        | 0        | 0        |
| LTR           | MaLR          | MTA_Mm  | chr1  | 16941142 | 16941183 + | 0        | 0        | 0        |
| SINE          | Alu           | B1_Mus1 | chr1  | 17049117 | 17049131 + | 0        | 0        | 0        |
| SINE          | Alu           | B1_Mus2 | chr1  | 17067491 | 17067506 - | 0        | 0        | 0        |
| LTR           | MaLR          | MTA_Mm  | chr1  | 17098593 | 17098632 - | 0        | 0        | 0        |
| LTR           | MaLR          | MTA_Mm  | chr1  | 17125178 | 17125217 + | 0        | 0        | 0        |
| SINE          | Alu           | B1_Mus1 | chr1  | 17140339 | 17140353 - | 0        | 0        | 0        |
| Simple_repeat | Simple_repeat | (A)n    | chr1  | 17224313 | 17224317 + | 0        | 0        | 0        |
| SINE          | Alu           | B1_Mm   | chr1  | 17283154 | 17283168 + | 0        | 0        | 0        |
| Simple_repeat | Simple_repeat | (A)n    | chr1  | 17283169 | 17283171 + | 0        | 0        | 0        |
| Simple_repeat | Simple_repeat | (A)n    | chr1  | 17293364 | 17293367 + | 0        | 0        | 0        |
| Simple_repeat | Simple_repeat | (A)n    | chr1  | 17318020 | 17318024 + | 0        | 0        | 0.615324 |
| SINE          | Alu           | B1_Mus2 | chr1  | 17432604 | 17432618 - | 0        | 0        | 0        |
| Simple_repeat | Simple_repeat | (A)n    | chr10 | 12341748 | 12341752 + | 0        | 0        | 0        |
| SINE          | Alu           | B1_Mur4 | chr10 | 12344922 | 12344936 + | 0        | 0        | 0        |
| Simple_repeat | Simple_repeat | (A)n    | chr10 | 12344936 | 12344941 + | 0        | 0        | 0        |
| Simple_repeat | Simple_repeat | (A)n    | chr1  | 17607958 | 17607962 + | 0        | 0        | 0        |
| SINE          | Alu           | B1_Mus2 | chr1  | 17697111 | 17697126 + | 0        | 0        | 0        |
| Simple_repeat | Simple_repeat | (A)n    | chr1  | 17697126 | 17697129 + | 0        | 0        | 0        |
| Simple_repeat | Simple_repeat | (A)n    | chr1  | 17874213 | 17874217 + | 0        | 0        | 0.342623 |
| SINE          | Alu           | B1_Mm   | chr1  | 17926703 | 17926717 + | 0        | 0        | 0        |
| Simple_repeat | Simple_repeat | (A)n    | chr1  | 17926717 | 17926720 + | 0        | 0        | 0        |

|               |               |            |       |          |            |          |          |          |
|---------------|---------------|------------|-------|----------|------------|----------|----------|----------|
| SINE          | Alu           | B1_Mm      | chr1  | 17926954 | 17926969 - | 0        | 0        | 0        |
| SINE          | Alu           | B1_Mus2    | chr10 | 12383812 | 12383827 - | 0        | 0        | 0        |
| LINE          | L1            | L1Md_T     | chr1  | 17985947 | 17986592 - | 0        | 0        | 0        |
| SINE          | Alu           | B1_Mur3    | chr1  | 18008099 | 18008114 + | 0        | 0        | 0        |
| Simple_repeat | Simple_repeat | (A)n       | chr1  | 18008114 | 18008118 + | 0        | 0        | 0        |
| SINE          | B2            | B2_Mm2     | chr1  | 18018847 | 18018866 + | 0        | 0.708814 | 0        |
| SINE          | Alu           | B1_Mm      | chr1  | 18022641 | 18022657 - | 0        | 0        | 0        |
| SINE          | Alu           | B1_Mus1    | chr1  | 18027269 | 18027283 + | 0        | 0        | 0        |
| Simple_repeat | Simple_repeat | (A)n       | chr1  | 18027283 | 18027286 + | 0        | 0        | 0        |
| Simple_repeat | Simple_repeat | (A)n       | chr1  | 18248458 | 18248464 + | 0        | 0        | 0        |
| SINE          | Alu           | B1_Mus2    | chr1  | 18249198 | 18249212 - | 0        | 0        | 0        |
| SINE          | Alu           | B1_Mm      | chr1  | 18256524 | 18256538 - | 0        | 0        | 0        |
| Simple_repeat | Simple_repeat | (CCAA)n    | chr1  | 18320542 | 18320545 + | 0        | 0        | 0        |
| Simple_repeat | Simple_repeat | (A)n       | chr1  | 18320545 | 18320548 + | 0        | 0        | 0        |
| LTR           | MaLR          | MTB        | chr1  | 18320558 | 18320596 + | 0        | 0        | 0        |
| LTR           | MaLR          | MTC        | chr1  | 18325040 | 18325083 + | 0        | 0        | 0        |
| Simple_repeat | Simple_repeat | (A)n       | chr1  | 18327431 | 18327433 + | 0        | 0        | 0        |
| SINE          | Alu           | B1_Mus1    | chr10 | 12429515 | 12429529 + | 0        | 0        | 0        |
| Simple_repeat | Simple_repeat | (A)n       | chr10 | 12429529 | 12429532 + | 0        | 0        | 0        |
| SINE          | Alu           | B1_Mus2    | chr1  | 18356546 | 18356561 - | 0        | 0        | 0        |
| SINE          | Alu           | B1_Mus2    | chr1  | 18369061 | 18369076 - | 0        | 0        | 0        |
| SINE          | Alu           | B1_Mus2    | chr1  | 18400639 | 18400654 + | 0        | 0        | 0        |
| Simple_repeat | Simple_repeat | (A)n       | chr1  | 18400654 | 18400656 + | 0        | 0        | 0        |
| SINE          | Alu           | B1_Mm      | chr1  | 18407683 | 18407699 + | 0        | 0        | 0        |
| Simple_repeat | Simple_repeat | (A)n       | chr1  | 18407699 | 18407701 + | 0        | 0        | 0        |
| Simple_repeat | Simple_repeat | (A)n       | chr1  | 18410166 | 18410170 + | 0        | 0        | 0        |
| LTR           | MaLR          | MTA_Mm     | chr1  | 18417173 | 18417207 + | 0        | 0        | 0        |
| SINE          | Alu           | B1_Mus1    | chr1  | 18421971 | 18421986 - | 0        | 0        | 0        |
| LTR           | MaLR          | MTA_Mm     | chr1  | 18427452 | 18427490 + | 0        | 0        | 0        |
| SINE          | B2            | B2_Mm2     | chr1  | 18448274 | 18448292 - | 0        | 0        | 0        |
| LTR           | MaLR          | MTA_Mm     | chr1  | 18460665 | 18460704 - | 0        | 0        | 0        |
| LTR           | MaLR          | MTB        | chr1  | 18468697 | 18468735 + | 0        | 0        | 0        |
| LINE          | L1            | L1Md_A     | chr1  | 18563364 | 18563884 + | 0        | 0        | 0.615324 |
| SINE          | Alu           | B1_Mm      | chr1  | 18564024 | 18564039 + | 0        | 0        | 0        |
| Simple_repeat | Simple_repeat | (A)n       | chr1  | 18564039 | 18564041 + | 0        | 0        | 0        |
| LTR           | MaLR          | MTA_Mm     | chr1  | 18579494 | 18579533 - | 0        | 0        | 0        |
| SINE          | Alu           | B1_Mm      | chr1  | 18582573 | 18582588 - | 0        | 0        | 0        |
| LTR           | MaLR          | MTA_Mm     | chr1  | 18591635 | 18591672 - | 0        | 0        | 0        |
| scRNA         | scRNA         | 4.5SRNA    | chr1  | 18628971 | 18628980 - | 0        | 0        | 0        |
| Simple_repeat | Simple_repeat | (A)n       | chr1  | 18643865 | 18643869 + | 0        | 0        | 0        |
| SINE          | Alu           | B1_Mus2    | chr1  | 18649547 | 18649561 + | 0        | 0        | 0        |
| Simple_repeat | Simple_repeat | (A)n       | chr1  | 18649562 | 18649568 + | 0        | 0        | 0        |
| SINE          | Alu           | B1_Mus2    | chr1  | 18651108 | 18651123 - | 0        | 0        | 0        |
| Simple_repeat | Simple_repeat | (A)n       | chr10 | 12460273 | 12460277 + | 0        | 0        | 0        |
| SINE          | Alu           | B1F1       | chr1  | 18687420 | 18687435 + | 0.591053 | 0        | 0        |
| Simple_repeat | Simple_repeat | (A)n       | chr1  | 18687435 | 18687437 + | 0.591053 | 0        | 0        |
| LTR           | MaLR          | MTA_Mm     | chr1  | 18766752 | 18766791 + | 0        | 0        | 0        |
| SINE          | B2            | B2_Mm1t    | chr1  | 18862658 | 18862676 - | 0        | 0        | 0        |
| LTR           | MaLR          | MTA_Mm     | chr1  | 18930818 | 18930858 - | 0        | 0        | 0        |
| LTR           | MaLR          | MTA_Mm     | chr10 | 12502629 | 12502668 + | 0        | 0        | 0        |
| LTR           | MaLR          | MTA_Mm     | chr1  | 19078965 | 19079003 + | 0        | 0        | 0        |
| Simple_repeat | Simple_repeat | (A)n       | chr1  | 19092659 | 19092662 + | 0        | 0        | 0        |
| SINE          | Alu           | B1_Mus2    | chr1  | 19182386 | 19182400 + | 0        | 0        | 0        |
| SINE          | Alu           | B1_Mus1    | chr1  | 19191874 | 19191889 - | 0        | 0        | 0        |
| LTR           | MaLR          | MTA_Mm     | chr1  | 19245327 | 19245366 - | 0        | 0        | 0        |
| LTR           | MaLR          | MTA_Mm     | chr1  | 19252164 | 19252203 + | 0        | 0        | 0        |
| LTR           | MaLR          | ORR1D2-int | chr1  | 19296447 | 19296586 - | 0        | 0        | 0        |
| SINE          | Alu           | B1_Mus2    | chr1  | 19348887 | 19348901 + | 0.591053 | 0        | 0        |
| Simple_repeat | Simple_repeat | (A)n       | chr1  | 19348901 | 19348904 + | 0        | 0        | 0        |
| SINE          | Alu           | B1_Mus2    | chr1  | 19511831 | 19511845 + | 0        | 0        | 0        |
| Simple_repeat | Simple_repeat | (A)n       | chr1  | 19511845 | 19511848 + | 0        | 0        | 0        |
| Simple_repeat | Simple_repeat | (A)n       | chr1  | 19542514 | 19542519 + | 0        | 0        | 0        |
| Simple_repeat | Simple_repeat | (A)n       | chr1  | 19591308 | 19591311 + | 0        | 0        | 0        |
| SINE          | B2            | B2_Mm1t    | chr1  | 19636896 | 19636915 + | 0        | 0        | 0        |
| Simple_repeat | Simple_repeat | (A)n       | chr1  | 19636915 | 19636919 + | 0        | 0.380568 | 0        |
| SINE          | Alu           | B1_Mus2    | chr2  | 3174406  | 3174524 +  | 0        | 0        | 0        |
| Simple_repeat | Simple_repeat | (A)n       | chr2  | 3174525  | 3174560 +  | 0        | 0        | 0        |

|                |                |         |       |          |          |   |          |          |          |
|----------------|----------------|---------|-------|----------|----------|---|----------|----------|----------|
| SINE           | Alu            | B1_Mus1 | chr2  | 4910347  | 4910485  | - | 0        | 0        | 0        |
| SINE           | Alu            | B1_Mus2 | chr2  | 4941248  | 4941393  | + | 0        | 0        | 0        |
| Simple_repeat  | Simple_repeat  | (A)n    | chr2  | 4941394  | 4941420  | + | 0        | 0        | 0        |
| SINE           | Alu            | B1_Mus2 | chr2  | 5188456  | 5188602  | - | 0        | 0.761137 | 0        |
| SINE           | ID             | ID4_    | chr2  | 5639734  | 5639813  | - | 0        | 0        | 0        |
| SINE           | Alu            | B1_Mm   | chr10 | 12605613 | 12605628 | - | 0        | 0        | 0        |
| LTR            | MaLR           | MTB     | chr10 | 12613028 | 12613067 | - | 0        | 0        | 0        |
| LINE           | L1             | L1Md_F  | chr2  | 7668777  | 7674169  | + | 0        | 0        | 0        |
| LTR            | MaLR           | MTA_Mm  | chr2  | 8019490  | 8019896  | + | 0        | 0        | 0.342623 |
| LTR            | MaLR           | MTA_Mm  | chr2  | 8094306  | 8094695  | - | 0        | 0        | 0        |
| LINE           | L1             | L1Md_T  | chr2  | 8104924  | 8112296  | - | 0        | 0        | 0        |
| Simple_repeat  | Simple_repeat  | (A)n    | chr2  | 8137806  | 8137832  | + | 0        | 0        | 0        |
| Simple_repeat  | Simple_repeat  | (A)n    | chr2  | 9344965  | 9345004  | + | 0        | 0        | 0        |
| Simple_repeat  | Simple_repeat  | (A)n    | chr2  | 9346563  | 9346599  | + | 0        | 0        | 0        |
| SINE           | Alu            | B1_Mus2 | chr2  | 9535307  | 9535432  | + | 0        | 0.380568 | 0        |
| Simple_repeat  | Simple_repeat  | (A)n    | chr2  | 9535433  | 9535457  | + | 0        | 0.380568 | 0        |
| Simple_repeat  | Simple_repeat  | (A)n    | chr2  | 9633930  | 9633967  | + | 0        | 0        | 0        |
| SINE           | Alu            | B1_Mus1 | chr2  | 9974454  | 9974601  | - | 0        | 0        | 0.342623 |
| SINE           | Alu            | B1_Mm   | chr2  | 10069667 | 10069812 | - | 0        | 0        | 0        |
| SINE           | Alu            | B1_Mus2 | chr2  | 10184888 | 10185030 | + | 0        | 0        | 0        |
| Simple_repeat  | Simple_repeat  | (A)n    | chr2  | 10185031 | 10185063 | + | 0        | 0        | 0        |
| SINE           | Alu            | B1_Mm   | chr2  | 10996014 | 10996166 | - | 0        | 0        | 0        |
| Simple_repeat  | Simple_repeat  | (A)n    | chr2  | 11042593 | 11042632 | + | 0        | 0        | 0        |
| SINE           | Alu            | B1_Mm   | chr2  | 11536529 | 11536665 | - | 0        | 0        | 0        |
| LTR            | MaLR           | MTB     | chr2  | 11658208 | 11658603 | - | 0.332194 | 0        | 1.10507  |
| LTR            | MaLR           | MTA_Mm  | chr2  | 12411968 | 12412365 | - | 0        | 0        | 0.342623 |
| LTR            | MaLR           | MTA_Mm  | chr2  | 12704276 | 12704671 | - | 0        | 0        | 0        |
| LTR            | MaLR           | MTA_Mm  | chr2  | 12792305 | 12792684 | - | 0        | 0        | 0        |
| LTR            | MaLR           | MTA_Mm  | chr2  | 12793772 | 12794151 | - | 0        | 0        | 0        |
| LINE           | L1             | L1_Mus3 | chr2  | 13838048 | 13843246 | - | 0        | 0        | 0        |
| SINE           | Alu            | B1_Mus1 | chr2  | 15183472 | 15183605 | - | 0        | 0        | 0        |
| LINE           | L1             | L1_Mus1 | chr2  | 15571270 | 15577248 | - | 0        | 0        | 0        |
| SINE           | Alu            | B1_Mus1 | chr2  | 15891210 | 15891323 | - | 0        | 0        | 0        |
| LINE           | L1             | L1Md_F3 | chr2  | 15987699 | 15993003 | - | 0        | 0        | 0        |
| SINE           | B2             | B2_Mm1a | chr2  | 15993004 | 15993194 | - | 0        | 0        | 0        |
| Simple_repeat  | Simple_repeat  | (A)n    | chr10 | 12682722 | 12682725 | + | 0        | 0        | 0        |
| LINE           | L1             | L1Md_T  | chr2  | 17045803 | 17053054 | - | 0        | 0.708814 | 0.615324 |
| SINE           | Alu            | B1_Mus2 | chr2  | 17810394 | 17810540 | + | 0        | 0        | 0        |
| Simple_repeat  | Simple_repeat  | (A)n    | chr2  | 17810541 | 17810568 | + | 0        | 0        | 0        |
| SINE           | Alu            | B1_Mus1 | chr2  | 17835780 | 17835927 | - | 0        | 0        | 0        |
| Simple_repeat  | Simple_repeat  | (A)n    | chr2  | 17859018 | 17859044 | + | 0        | 0        | 0        |
| SINE           | B2             | B3      | chr2  | 17942916 | 17943132 | + | 0        | 0        | 0        |
| Low_complexity | Low_complexity | A-rich  | chr2  | 17943133 | 17943148 | + | 0        | 0        | 0        |
| SINE           | Alu            | B1_Mus1 | chr2  | 18489599 | 18489751 | - | 0        | 0        | 0        |
| SINE           | Alu            | PB1     | chr2  | 18570164 | 18570294 | + | 0        | 0        | 0        |
| Simple_repeat  | Simple_repeat  | (A)n    | chr2  | 18570295 | 18570330 | + | 0        | 0        | 0        |
| LTR            | MaLR           | MTA_Mm  | chr2  | 19716613 | 19717007 | + | 0        | 0        | 0.615324 |
| LTR            | MaLR           | MTA_Mm  | chr2  | 19874272 | 19874666 | + | 0        | 0        | 0.615324 |
| SINE           | Alu            | B1_Mus2 | chr2  | 20738694 | 20738840 | - | 0        | 0        | 0        |
| Simple_repeat  | Simple_repeat  | (A)n    | chr2  | 20761569 | 20761616 | + | 0.332194 | 0        | 0.615324 |
| Simple_repeat  | Simple_repeat  | (A)n    | chr2  | 22609311 | 22609357 | + | 0        | 0        | 0.342623 |
| SINE           | Alu            | B1_Mm   | chr2  | 24222450 | 24222582 | + | 0        | 0        | 0        |
| Simple_repeat  | Simple_repeat  | (A)n    | chr2  | 24421154 | 24421184 | + | 0        | 0        | 0        |
| SINE           | B2             | B2_Mm1a | chr2  | 25112232 | 25112423 | - | 4.2745   | 4.08066  | 1.55647  |
| SINE           | Alu            | B1_Mus2 | chr2  | 25234837 | 25234983 | - | 0        | 0        | 0        |
| Simple_repeat  | Simple_repeat  | (A)n    | chr2  | 25308113 | 25308140 | + | 0        | 0        | 0        |
| SINE           | Alu            | B1_Mus1 | chr2  | 25408962 | 25409108 | - | 0        | 0        | 0        |
| SINE           | Alu            | B1_Mm   | chr2  | 25846423 | 25846540 | - | 0        | 0        | 0        |
| SINE           | Alu            | B1_Mus2 | chr2  | 26312691 | 26312836 | - | 0        | 0        | 0        |
| SINE           | Alu            | B1_Mm   | chr2  | 26480540 | 26480686 | - | 0        | 0        | 0        |
| Simple_repeat  | Simple_repeat  | (A)n    | chr2  | 26642995 | 26643040 | + | 0        | 0        | 0        |
| SINE           | Alu            | B1_Mus2 | chr2  | 26886568 | 26886721 | - | 0        | 0        | 0        |
| SINE           | Alu            | B1_Mm   | chr2  | 27366863 | 27367008 | + | 0        | 0        | 0        |
| Simple_repeat  | Simple_repeat  | (A)n    | chr2  | 27367009 | 27367035 | + | 0        | 0        | 0        |
| Simple_repeat  | Simple_repeat  | (A)n    | chr2  | 27432622 | 27432652 | + | 0        | 0        | 0.342623 |
| Low_complexity | Low_complexity | A-rich  | chr2  | 27471180 | 27471254 | + | 0        | 0        | 0        |
| LTR            | ERV_L          | MT2B    | chr2  | 27646356 | 27646921 | - | 0        | 0        | 0        |

|                |                |         |       |                     |          |          |          |
|----------------|----------------|---------|-------|---------------------|----------|----------|----------|
| SINE           | Alu            | B1_Mm   | chr2  | 27646922 27647070 - | 0        | 0        | 0        |
| SINE           | B2             | B2_Mm2  | chr2  | 27648007 27648211 - | 0        | 0        | 0        |
| SINE           | Alu            | B1_Mm   | chr2  | 27648212 27648358 - | 0        | 0        | 0        |
| SINE           | Alu            | B1_Mm   | chr2  | 28298026 28298182 + | 0        | 0        | 0        |
| Simple_repeat  | Simple_repeat  | (A)n    | chr2  | 28298183 28298208 + | 0        | 0        | 0        |
| SINE           | Alu            | B1_Mur4 | chr2  | 28333744 28333875 - | 0        | 0        | 0        |
| SINE           | B2             | B2_Mm2  | chr2  | 28792407 28792561 + | 0        | 0        | 0        |
| SINE           | Alu            | B1_Mus1 | chr10 | 12765388 12765403 - | 0        | 0        | 0        |
| SINE           | Alu            | B1_Mus2 | chr2  | 28965950 28966095 + | 0        | 0        | 0        |
| Simple_repeat  | Simple_repeat  | (A)n    | chr2  | 28966096 28966126 + | 0        | 0        | 0        |
| SINE           | Alu            | B1_Mus2 | chr2  | 28970577 28970722 - | 0        | 0        | 0        |
| SINE           | Alu            | B1_Mus2 | chr2  | 29045436 29045582 - | 0        | 0        | 0        |
| Simple_repeat  | Simple_repeat  | (A)n    | chr2  | 29049719 29049761 + | 0        | 0        | 0        |
| SINE           | Alu            | B1_Mus2 | chr2  | 29987658 29987804 - | 0        | 0        | 0        |
| SINE           | Alu            | B1_Mus2 | chr2  | 30036357 30036502 - | 0        | 0        | 0        |
| SINE           | Alu            | B1_Mus2 | chr2  | 30072376 30072508 + | 0        | 0        | 0        |
| Simple_repeat  | Simple_repeat  | (A)n    | chr2  | 30072509 30072536 + | 0        | 0        | 0        |
| Simple_repeat  | Simple_repeat  | (A)n    | chr2  | 30219269 30219304 + | 0        | 0        | 0        |
| SINE           | Alu            | B1_Mus2 | chr2  | 30584386 30584532 + | 0        | 0        | 0        |
| SINE           | Alu            | B1_Mm   | chr10 | 12781178 12781193 - | 0        | 0        | 0        |
| SINE           | Alu            | B1_Mus2 | chr2  | 31074800 31074946 + | 0        | 0        | 0        |
| Simple_repeat  | Simple_repeat  | (A)n    | chr2  | 31074947 31074970 + | 0        | 0        | 0        |
| LTR            | MaLR           | MTA_Mm  | chr2  | 31181852 31182247 - | 0        | 0        | 0        |
| SINE           | Alu            | B1_Mus2 | chr2  | 31407169 31407315 - | 0        | 0        | 0        |
| SINE           | Alu            | PB1D9   | chr2  | 31484280 31484427 + | 0        | 0        | 0        |
| Simple_repeat  | Simple_repeat  | (A)n    | chr2  | 31540855 31540898 + | 0        | 0        | 0        |
| SINE           | Alu            | B1_Mus2 | chr2  | 31985852 31985999 - | 0        | 0        | 0        |
| SINE           | Alu            | B1_Mm   | chr2  | 32131259 32131405 + | 0        | 0        | 0        |
| Simple_repeat  | Simple_repeat  | (A)n    | chr2  | 32131406 32131462 + | 0        | 0        | 0.342623 |
| LTR            | MaLR           | MTB_Mm  | chr2  | 32260946 32261348 + | 0        | 0        | 0        |
| SINE           | Alu            | B1_Mus2 | chr2  | 32314881 32315027 + | 0        | 0        | 0        |
| SINE           | Alu            | B1_Mus2 | chr2  | 32339271 32339417 - | 0        | 0        | 0        |
| SINE           | Alu            | B1_Mus2 | chr2  | 32952829 32952975 - | 0        | 0.708814 | 0        |
| SINE           | Alu            | B1_Mus2 | chr2  | 33329746 33329892 - | 0        | 0        | 0        |
| SINE           | Alu            | B1_Mm   | chr10 | 12799254 12799266 + | 0        | 0        | 0        |
| Simple_repeat  | Simple_repeat  | (A)n    | chr10 | 12799266 12799268 + | 0.332194 | 0        | 0        |
| SINE           | Alu            | B1_Mus2 | chr10 | 12803614 12803629 - | 0        | 0        | 0        |
| SINE           | Alu            | B1_Mus2 | chr2  | 34270572 34270718 + | 0        | 0        | 0        |
| SINE           | B2             | B2_Mm1a | chr10 | 12805311 12805330 - | 0        | 0        | 0        |
| SINE           | Alu            | B1_Mus1 | chr2  | 34530110 34530221 - | 0.591053 | 0        | 0.615324 |
| SINE           | Alu            | B1_Mus2 | chr2  | 34682611 34682757 - | 0        | 0        | 0        |
| SINE           | Alu            | B1_Mus2 | chr2  | 34704026 34704171 - | 0        | 0        | 0        |
| SINE           | Alu            | B1_Mus2 | chr2  | 35361679 35361824 - | 0        | 0        | 0        |
| SINE           | Alu            | B1_Mus2 | chr10 | 12813408 12813422 + | 0        | 0        | 0        |
| Simple_repeat  | Simple_repeat  | (A)n    | chr10 | 12813422 12813425 + | 0        | 0        | 0        |
| LINE           | L1             | L1Md_F2 | chr2  | 36318816 36324107 + | 0        | 0        | 0        |
| LTR            | MaLR           | MTA_Mm  | chr2  | 36583643 36584036 - | 0        | 0        | 0        |
| LTR            | MaLR           | MTA_Mm  | chr2  | 36585133 36585528 - | 0        | 0        | 0        |
| Simple_repeat  | Simple_repeat  | (A)n    | chr2  | 36727353 36727380 + | 0        | 0        | 0        |
| LTR            | MaLR           | MTA_Mm  | chr2  | 36944566 36944960 - | 0        | 0        | 0.615324 |
| Simple_repeat  | Simple_repeat  | (A)n    | chr2  | 37045703 37045754 + | 0        | 0        | 0        |
| SINE           | Alu            | B1_Mm   | chr2  | 37590106 37590244 - | 0        | 0        | 0        |
| SINE           | B2             | B2_Mm1t | chr2  | 38190104 38190296 - | 0        | 0        | 0        |
| LTR            | MaLR           | MTA_Mm  | chr2  | 38522241 38522637 + | 0        | 0        | 0        |
| SINE           | Alu            | B1_Mm   | chr2  | 38849302 38849447 - | 0        | 0        | 0        |
| LINE           | L1             | L1Md_T  | chr2  | 39096000 39102538 - | 0        | 0        | 0        |
| LTR            | MaLR           | MTA_Mm  | chr2  | 39592935 39593314 - | 0        | 0        | 0        |
| SINE           | Alu            | B1_Mus1 | chr2  | 39771964 39772109 - | 0        | 0        | 0        |
| LINE           | L1             | L1_Mus1 | chr2  | 40268705 40274952 + | 0        | 0        | 0        |
| SINE           | Alu            | B1_Mm   | chr2  | 40290357 40290503 - | 0        | 0        | 0        |
| SINE           | Alu            | B1_Mus2 | chr2  | 40308786 40308932 + | 0        | 0        | 0        |
| Simple_repeat  | Simple_repeat  | (A)n    | chr2  | 42733048 42733126 + | 0        | 0        | 0        |
| SINE           | Alu            | B1_Mus2 | chr2  | 42954132 42954278 - | 0        | 0        | 0        |
| Simple_repeat  | Simple_repeat  | (A)n    | chr2  | 43052043 43052082 + | 0        | 0        | 0.342623 |
| Low_complexity | Low_complexity | A-rich  | chr2  | 44364201 44364253 + | 0        | 0        | 0        |
| SINE           | Alu            | B1_Mm   | chr2  | 44773401 44773546 - | 0.591053 | 3.42939  | 3.41924  |
| Simple_repeat  | Simple_repeat  | (A)n    | chr2  | 45168811 45168837 + | 0        | 0        | 0.615324 |

|               |               |          |       |                     |          |          |          |
|---------------|---------------|----------|-------|---------------------|----------|----------|----------|
| Simple_repeat | Simple_repeat | (A)n     | chr2  | 45245759 45245799 + | 0        | 0        | 0        |
| SINE          | Alu           | B1_Mus2  | chr2  | 45583728 45583873 - | 0        | 0        | 0        |
| LTR           | MaLR          | MTA_Mm   | chr2  | 45662432 45662827 + | 0        | 0        | 0        |
| Simple_repeat | Simple_repeat | (A)n     | chr2  | 45960948 45960987 + | 0        | 0        | 0        |
| LINE          | L1            | Lx       | chr2  | 46065352 46071469 + | 0        | 0        | 0        |
| SINE          | Alu           | B1_Mus2  | chr2  | 46258723 46258869 - | 0        | 0        | 0        |
| Simple_repeat | Simple_repeat | (A)n     | chr2  | 46438228 46438291 + | 0        | 0        | 0        |
| LTR           | MaLR          | MTA_Mm   | chr2  | 46644108 46644502 + | 0        | 0        | 0        |
| LINE          | L1            | L1Md_T   | chr2  | 46978311 46984999 - | 0        | 0        | 0        |
| Simple_repeat | Simple_repeat | (A)n     | chr2  | 47444296 47444372 + | 0        | 0        | 0        |
| SINE          | Alu           | B1_Mus2  | chr2  | 47900533 47900678 - | 0        | 0        | 0        |
| Simple_repeat | Simple_repeat | (A)n     | chr2  | 48183114 48183141 + | 0        | 0        | 0        |
| LTR           | MaLR          | MTA_Mm   | chr2  | 48207153 48207547 - | 0        | 0        | 0.615324 |
| Simple_repeat | Simple_repeat | (A)n     | chr2  | 48253409 48253447 + | 0        | 0        | 0        |
| Simple_repeat | Simple_repeat | (A)n     | chr10 | 12915602 12915607 + | 0        | 0        | 0        |
| Simple_repeat | Simple_repeat | (A)n     | chr2  | 48269214 48269251 + | 0        | 0        | 0        |
| SINE          | Alu           | B1_Mus2  | chr2  | 48285677 48285791 + | 0        | 0        | 0        |
| LTR           | MaLR          | MTA_Mm   | chr2  | 49852366 49852761 + | 0        | 0        | 0        |
| LINE          | L1            | L1_Mus2  | chr2  | 50093544 50098384 + | 0        | 0        | 0        |
| SINE          | Alu           | B1_Mus2  | chr2  | 50859728 50859870 + | 0        | 0        | 0        |
| Simple_repeat | Simple_repeat | (A)n     | chr2  | 50859871 50859916 + | 0        | 0        | 0        |
| LTR           | MaLR          | MTA_Mm   | chr2  | 51650234 51650632 + | 0        | 0        | 0        |
| SINE          | Alu           | B1F2     | chr2  | 52708737 52708874 + | 0        | 0        | 0        |
| Simple_repeat | Simple_repeat | (A)n     | chr2  | 52708875 52708898 + | 0        | 0        | 0        |
| SINE          | Alu           | B1_Mm    | chr10 | 12970117 12970131 - | 0        | 0        | 0        |
| SINE          | Alu           | B1_Mm    | chr2  | 53803224 53803370 + | 0        | 0        | 0        |
| Simple_repeat | Simple_repeat | (A)n     | chr2  | 53803371 53803394 + | 0        | 0        | 0        |
| LINE          | L1            | L1Md_Gf  | chr10 | 12974136 12974622 + | 0        | 0        | 0        |
| Simple_repeat | Simple_repeat | (A)n     | chr2  | 54279650 54279684 + | 0        | 0        | 0        |
| SINE          | Alu           | B1_Mus2  | chr2  | 55522730 55522860 - | 0        | 0        | 0        |
| Simple_repeat | Simple_repeat | (A)n     | chr2  | 55800233 55800279 + | 0        | 0        | 0.342623 |
| LINE          | L1            | L1Md_A   | chr2  | 55902154 55908318 - | 0        | 0        | 0        |
| LINE          | L1            | L1Md_F   | chr2  | 56195494 56200714 + | 0        | 0        | 0        |
| Simple_repeat | Simple_repeat | (A)n     | chr2  | 56372732 56372772 + | 0        | 0        | 0        |
| Simple_repeat | Simple_repeat | (TTTA)n  | chr10 | 12997844 12997848 + | 0        | 0        | 0        |
| Simple_repeat | Simple_repeat | (A)n     | chr2  | 56944017 56944051 + | 0        | 0        | 0        |
| Simple_repeat | Simple_repeat | (A)n     | chr2  | 58115573 58115614 + | 0        | 0        | 0        |
| SINE          | Alu           | B1_Mus2  | chr2  | 59206251 59206397 - | 0        | 0        | 0        |
| SINE          | Alu           | B1_Mus1  | chr11 | 3148936 3149084 +   | 0        | 0        | 0        |
| Simple_repeat | Simple_repeat | (A)n     | chr11 | 3149085 3149108 +   | 0        | 0        | 0        |
| LTR           | MaLR          | MTB      | chr2  | 59444099 59444506 - | 0        | 0        | 0        |
| SINE          | Alu           | B1_Mm    | chr2  | 60013074 60013219 + | 0        | 0        | 0        |
| Simple_repeat | Simple_repeat | (A)n     | chr2  | 60013220 60013247 + | 0.664388 | 0        | 0        |
| SINE          | Alu           | B1_Mm    | chr2  | 60035799 60035945 - | 1.77316  | 0        | 0        |
| Simple_repeat | Simple_repeat | (A)n     | chr2  | 60975299 60975334 + | 0        | 0        | 0        |
| Simple_repeat | Simple_repeat | (A)n     | chr2  | 61065448 61065487 + | 0        | 0        | 0        |
| Simple_repeat | Simple_repeat | (A)n     | chr2  | 61108608 61108690 + | 0.332194 | 0        | 0        |
| Simple_repeat | Simple_repeat | (A)n     | chr2  | 61495503 61495539 + | 0        | 0        | 0        |
| SINE          | Alu           | B1_Mus2  | chr2  | 61760922 61761066 - | 0        | 0        | 0        |
| LTR           | MaLR          | MTA_Mm   | chr2  | 61859480 61859875 + | 0        | 0.708814 | 0        |
| Simple_repeat | Simple_repeat | (A)n     | chr2  | 64359226 64359254 + | 0        | 0        | 0        |
| SINE          | Alu           | B1_Mus1  | chr11 | 3451341 3451487 +   | 0        | 0        | 0        |
| SINE          | Alu           | B1_Mus1  | chr2  | 64593170 64593319 + | 0        | 0        | 0        |
| Simple_repeat | Simple_repeat | (A)n     | chr2  | 64593320 64593348 + | 0        | 0        | 0        |
| SINE          | Alu           | B1_Mus1  | chr2  | 64876634 64876773 - | 0        | 0        | 0        |
| SINE          | Alu           | B1_Mus2  | chr11 | 3487094 3487238 +   | 0        | 0        | 0        |
| SINE          | Alu           | B1_Mus2  | chr2  | 65152663 65152809 - | 0.591053 | 0        | 1.23065  |
| Simple_repeat | Simple_repeat | (GAAAA)n | chr11 | 3487239 3487296 +   | 0        | 0        | 0        |
| SINE          | Alu           | B1_Mus2  | chr11 | 3514977 3515112 -   | 0        | 0        | 0        |
| Simple_repeat | Simple_repeat | (A)n     | chr2  | 65986615 65986653 + | 0        | 0        | 0        |
| SINE          | Alu           | B1_Mus1  | chr2  | 65991120 65991267 - | 0        | 0        | 0        |
| SINE          | Alu           | B1_Mus1  | chr2  | 69045129 69045267 + | 0        | 0        | 0        |
| Simple_repeat | Simple_repeat | (A)n     | chr2  | 69045268 69045317 + | 0        | 0        | 0        |
| SINE          | B2            | B2_Mm1a  | chr2  | 69675563 69675750 - | 1.8711   | 0        | 1.10507  |
| SINE          | Alu           | B1_Mm    | chr2  | 72117938 72118084 - | 0        | 0        | 0        |
| SINE          | Alu           | B1_Mm    | chr2  | 72456529 72456669 - | 0        | 0        | 0        |
| Simple_repeat | Simple_repeat | (A)n     | chr2  | 72515787 72515829 + | 0        | 0        | 0.342623 |

|                |                |         |       |                     |          |          |          |
|----------------|----------------|---------|-------|---------------------|----------|----------|----------|
| SINE           | Alu            | B1_Mus1 | chr2  | 72891845 72891982 + | 0        | 0        | 0        |
| Simple_repeat  | Simple_repeat  | (A)n    | chr2  | 72891983 72892008 + | 0        | 0        | 0        |
| Simple_repeat  | Simple_repeat  | (A)n    | chr2  | 73104912 73104955 + | 0        | 0.380568 | 0        |
| Simple_repeat  | Simple_repeat  | (A)n    | chr2  | 73873861 73873937 + | 0        | 0        | 0        |
| SINE           | Alu            | B1_Mm   | chr2  | 74022372 74022519 + | 0        | 0        | 0        |
| Simple_repeat  | Simple_repeat  | (A)n    | chr2  | 74022520 74022599 + | 0        | 0.380568 | 0.342623 |
| Simple_repeat  | Simple_repeat  | (A)n    | chr2  | 74987483 74987553 + | 0        | 0        | 0        |
| LINE           | L1             | L1Md_T  | chr2  | 75064941 75071646 - | 0        | 0        | 0        |
| SINE           | Alu            | B1_Mus1 | chr2  | 75457827 75457974 + | 0        | 0        | 0        |
| Simple_repeat  | Simple_repeat  | (A)n    | chr2  | 75457975 75458000 + | 0        | 0        | 0        |
| SINE           | Alu            | B1_Mm   | chr2  | 75509888 75510034 + | 0        | 0.380568 | 0        |
| Simple_repeat  | Simple_repeat  | (A)n    | chr2  | 75510035 75510060 + | 0        | 0.380568 | 0        |
| SINE           | B2             | B2_Mm2  | chr2  | 75616894 75617078 - | 0        | 0        | 0        |
| SINE           | Alu            | B1_Mus1 | chr2  | 76207358 76207505 - | 0        | 0        | 0        |
| Simple_repeat  | Simple_repeat  | (A)n    | chr11 | 4502051 4502085 +   | 0        | 0        | 0        |
| Simple_repeat  | Simple_repeat  | (A)n    | chr2  | 78179694 78179734 + | 0        | 0        | 0        |
| Simple_repeat  | Simple_repeat  | (A)n    | chr2  | 78351205 78351235 + | 0        | 0        | 0        |
| Simple_repeat  | Simple_repeat  | (A)n    | chr2  | 78706556 78706578 + | 0        | 0        | 0        |
| SINE           | Alu            | B1_Mur3 | chr2  | 78848527 78848636 - | 0        | 0        | 0        |
| Simple_repeat  | Simple_repeat  | (A)n    | chr2  | 79272503 79272538 + | 0        | 0        | 0        |
| Simple_repeat  | Simple_repeat  | (A)n    | chr2  | 79523881 79523928 + | 0        | 0        | 0        |
| SINE           | Alu            | B1_Mus1 | chr11 | 4598527 4598675 +   | 0        | 0        | 0        |
| Simple_repeat  | Simple_repeat  | (A)n    | chr11 | 4598676 4598699 +   | 0        | 0        | 0        |
| Simple_repeat  | Simple_repeat  | (A)n    | chr2  | 80339974 80340002 + | 0        | 0        | 0        |
| SINE           | Alu            | B1_Mus1 | chr2  | 80524282 80524419 - | 0        | 0        | 0        |
| SINE           | Alu            | B1_Mus1 | chr2  | 80596000 80596147 - | 0        | 0        | 0        |
| Simple_repeat  | Simple_repeat  | (A)n    | chr2  | 81278827 81278879 + | 0        | 0        | 0        |
| LINE           | L1             | L1Md_T  | chr2  | 82329221 82336204 - | 0        | 0        | 0        |
| SINE           | Alu            | B1_Mus1 | chr11 | 4753427 4753572 +   | 0        | 0        | 0        |
| Simple_repeat  | Simple_repeat  | (A)n    | chr11 | 4753573 4753596 +   | 0        | 0        | 0        |
| Simple_repeat  | Simple_repeat  | (A)n    | chr11 | 4760996 4761040 +   | 0        | 0        | 0        |
| LTR            | MaLR           | MTB     | chr2  | 83536245 83536646 + | 0        | 0        | 0        |
| LTR            | MaLR           | MTA_Mm  | chr2  | 83842446 83842829 + | 0.332194 | 0        | 0        |
| LTR            | MaLR           | MTA_Mm  | chr2  | 83981174 83981569 + | 0        | 0        | 0        |
| LTR            | MaLR           | MTA_Mm  | chr2  | 84005610 84006005 - | 0        | 0        | 0        |
| SINE           | B2             | B2_Mm1a | chr2  | 84421684 84421875 - | 0        | 0        | 0.615324 |
| SINE           | Alu            | B1_Mus1 | chr2  | 84424716 84424863 - | 0        | 0        | 0        |
| SINE           | B2             | B2_Mm1a | chr2  | 84673658 84673847 - | 0        | 0        | 0        |
| SINE           | Alu            | B1_Mm   | chr2  | 85124221 85124364 + | 0        | 0        | 0.615324 |
| Simple_repeat  | Simple_repeat  | (A)n    | chr2  | 85124365 85124416 + | 0.332194 | 0        | 0.615324 |
| Simple_repeat  | Simple_repeat  | (A)n    | chr2  | 85406802 85406824 + | 0        | 0        | 0        |
| SINE           | Alu            | B1_Mus2 | chr2  | 86047210 86047348 - | 0        | 0        | 0        |
| SINE           | Alu            | B1_Mus1 | chr2  | 86198269 86198415 + | 0        | 0        | 0        |
| Simple_repeat  | Simple_repeat  | (A)n    | chr2  | 86198416 86198460 + | 0        | 0        | 0        |
| Simple_repeat  | Simple_repeat  | (A)n    | chr2  | 86261295 86261330 + | 0        | 0        | 0        |
| Simple_repeat  | Simple_repeat  | (A)n    | chr2  | 86445850 86445884 + | 0        | 0        | 0        |
| Low_complexity | Low_complexity | A-rich  | chr2  | 86594905 86595027 + | 0        | 0        | 0        |
| SINE           | Alu            | B1_Mm   | chr2  | 86836376 86836522 - | 0        | 0        | 0        |
| LTR            | MaLR           | MTA_Mm  | chr2  | 86901012 86901404 + | 0.591053 | 0        | 0        |
| SINE           | Alu            | B1_Mm   | chr2  | 87335028 87335174 - | 0        | 0        | 0        |
| SINE           | Alu            | B1_Mus2 | chr2  | 87337192 87337337 - | 0        | 0        | 0        |
| Simple_repeat  | Simple_repeat  | (A)n    | chr2  | 87826766 87826818 + | 0        | 0        | 0        |
| Simple_repeat  | Simple_repeat  | (A)n    | chr2  | 87929669 87929752 + | 0        | 0        | 0        |
| LINE           | L1             | L1Md_F3 | chr2  | 88006664 88012110 + | 0        | 0        | 0        |
| LINE           | L1             | L1Md_T  | chr2  | 88545232 88551738 - | 0        | 0        | 0        |
| SINE           | Alu            | B1_Mm   | chr2  | 88566862 88567002 + | 0        | 0        | 0        |
| Simple_repeat  | Simple_repeat  | (A)n    | chr2  | 88567003 88567031 + | 0        | 0        | 0.342623 |
| LINE           | L1             | L1Md_T  | chr2  | 89355875 89359530 - | 0        | 0        | 0        |
| LINE           | L1             | L1Md_T  | chr2  | 89733231 89739899 - | 0        | 0        | 0        |
| LTR            | MaLR           | MTA_Mm  | chr2  | 90431303 90431690 - | 0        | 0        | 0.957947 |
| SINE           | Alu            | B1_Mus1 | chr2  | 90466500 90466647 + | 0        | 0        | 0        |
| Simple_repeat  | Simple_repeat  | (A)n    | chr2  | 90466648 90466680 + | 0        | 0        | 0        |
| SINE           | Alu            | B1_Mus1 | chr2  | 90582071 90582215 + | 0.591053 | 0        | 0        |
| Simple_repeat  | Simple_repeat  | (A)n    | chr2  | 90582216 90582235 + | 0.591053 | 0        | 0        |
| SINE           | Alu            | B1_Mus1 | chr2  | 91564369 91564512 - | 0        | 0        | 0        |
| Simple_repeat  | Simple_repeat  | (A)n    | chr2  | 91569820 91569872 + | 0        | 0        | 0        |
| SINE           | B2             | B2_Mm1a | chr11 | 5393491 5393681 -   | 0        | 0        | 0        |

|               |               |           |       |                     |          |          |          |
|---------------|---------------|-----------|-------|---------------------|----------|----------|----------|
| Simple_repeat | Simple_repeat | (A)n      | chr2  | 93438493 93438529 + | 0.591053 | 0        | 0        |
| LTR           | MaLR          | MTA_Mm    | chr2  | 93759975 93760370 + | 0        | 0        | 0        |
| Simple_repeat | Simple_repeat | (A)n      | chr2  | 94103205 94103249 + | 0        | 0.380568 | 0        |
| SINE          | Alu           | B1_Mus2   | chr11 | 5599008 5599134 -   | 0        | 0        | 0        |
| SINE          | Alu           | B1_Mus2   | chr2  | 94568900 94569046 - | 0        | 0        | 0        |
| LTR           | MaLR          | MTA_Mm    | chr2  | 94685320 94685708 + | 0        | 0        | 0        |
| LINE          | L1            | L1Md_F2   | chr2  | 94929034 94935257 - | 0        | 0        | 0        |
| Simple_repeat | Simple_repeat | (A)n      | chr2  | 95158669 95158713 + | 0        | 0        | 0        |
| SINE          | Alu           | B1_Mus1   | chr2  | 95161043 95161186 + | 0        | 0        | 0        |
| Simple_repeat | Simple_repeat | (A)n      | chr2  | 95161187 95161215 + | 0        | 0        | 0        |
| LINE          | L1            | L1Md_F2   | chr2  | 95684500 95690724 - | 0        | 0        | 0        |
| SINE          | Alu           | B1_Mus2   | chr2  | 96148225 96148370 - | 0        | 0        | 0        |
| LINE          | L1            | L1Md_T    | chr2  | 96794845 96801163 - | 0        | 0        | 0        |
| Simple_repeat | Simple_repeat | (A)n      | chr2  | 96885365 96885408 + | 0        | 0        | 0        |
| Simple_repeat | Simple_repeat | (A)n      | chr2  | 96951977 96952012 + | 0        | 0        | 0        |
| Simple_repeat | Simple_repeat | (A)n      | chr2  | 97018336 97018377 + | 0        | 0        | 0        |
| LINE          | L1            | L1Md_F2   | chr2  | 97095760 97101107 - | 0        | 0        | 0        |
| Simple_repeat | Simple_repeat | (A)n      | chr2  | 97121797 97121844 + | 0        | 0        | 0        |
| SINE          | Alu           | B1_Mus2   | chr2  | 97123424 97123569 + | 0        | 0        | 0        |
| Simple_repeat | Simple_repeat | (A)n      | chr2  | 97123570 97123592 + | 0        | 0        | 0        |
| SINE          | Alu           | B1_Mus1   | chr2  | 98737189 98737336 + | 0        | 0        | 0        |
| SINE          | Alu           | B1_Mm     | chr2  | 98771918 98772064 - | 0        | 0        | 0        |
| SINE          | Alu           | B1_Mur2   | chr2  | 99023465 99023602 - | 0        | 0        | 0        |
| Simple_repeat | Simple_repeat | (A)n      | chr2  | 99237849 99237877 + | 0        | 0        | 0        |
| SINE          | Alu           | B1_Mus2   | chr2  | 99241251 99241397 + | 0        | 0        | 0        |
| SINE          | B2            | B3        | chr11 | 5996739 5996914 -   | 1.77316  | 0        | 0.615324 |
| SINE          | Alu           | B1_Mm     | chr11 | 5996947 5997092 -   | 1.77316  | 0        | 0.615324 |
| LTR           | MaLR          | MTA_Mm    | chr2  | 10034703 10034742 + | 0        | 0        | 0        |
| LTR           | MaLR          | MTA_Mm    | chr2  | 10034851 10034891 + | 0        | 0        | 0        |
| LTR           | MaLR          | MTA_Mm    | chr2  | 10051354 10051393 + | 0        | 0        | 0        |
| LTR           | MaLR          | MTA_Mm    | chr2  | 10051502 10051542 + | 0        | 0.380568 | 0        |
| SINE          | Alu           | B1_Mus1   | chr2  | 10085343 10085357 + | 0        | 0        | 0        |
| Simple_repeat | Simple_repeat | (A)n      | chr2  | 10085357 10085359 + | 0        | 0        | 0        |
| Simple_repeat | Simple_repeat | (A)n      | chr2  | 10093980 10093983 + | 0        | 0        | 0        |
| LTR           | MaLR          | MTB       | chr2  | 10176126 10176173 + | 0        | 0        | 0        |
| SINE          | Alu           | B1_Mm     | chr2  | 10224328 10224343 + | 0        | 0        | 0        |
| Simple_repeat | Simple_repeat | (A)n      | chr2  | 10224343 10224345 + | 0        | 0        | 0        |
| Simple_repeat | Simple_repeat | (TTTA)n   | chr11 | 6262050 6262091 +   | 0        | 0        | 0        |
| SINE          | Alu           | B1_Mus2   | chr11 | 6279738 6279884 -   | 0        | 0        | 0        |
| Simple_repeat | Simple_repeat | (A)n      | chr2  | 10365180 10365184 + | 0        | 0        | 0        |
| SINE          | Alu           | B1_Mus2   | chr11 | 6324646 6324792 -   | 0.591053 | 0        | 0.342623 |
| Simple_repeat | Simple_repeat | (TTTA)n   | chr2  | 10436202 10436210 + | 0        | 0        | 0        |
| Simple_repeat | Simple_repeat | (GAAAA)n  | chr2  | 10439869 10439875 + | 0        | 0        | 0        |
| SINE          | Alu           | B1_Mus2   | chr11 | 6355358 6355503 +   | 0        | 0        | 0        |
| Simple_repeat | Simple_repeat | (A)n      | chr11 | 6355504 6355528 +   | 0        | 0        | 0        |
| SINE          | Alu           | B1_Mm     | chr2  | 10469850 10469864 - | 0        | 0        | 0.615324 |
| Simple_repeat | Simple_repeat | (A)n      | chr2  | 10472345 10472352 + | 0        | 0        | 0        |
| Simple_repeat | Simple_repeat | (A)n      | chr2  | 10605853 10605856 + | 0        | 0        | 0        |
| Simple_repeat | Simple_repeat | (A)n      | chr2  | 10677446 10677449 + | 0        | 0        | 0        |
| SINE          | Alu           | B1_Mus1   | chr2  | 10727745 10727759 + | 0.591053 | 1.32017  | 0        |
| Simple_repeat | Simple_repeat | (A)n      | chr2  | 10727759 10727763 + | 0.591053 | 1.32017  | 0.615324 |
| Simple_repeat | Simple_repeat | (A)n      | chr2  | 10812954 10812958 + | 0        | 0        | 0        |
| LINE          | L1            | L1Md_F2   | chr2  | 10832956 10833486 + | 0        | 0        | 0        |
| Simple_repeat | Simple_repeat | (CAAAAA)n | chr2  | 10877913 10877926 + | 0        | 0        | 0        |
| LINE          | L1            | L1Md_F2   | chr2  | 10892637 10893145 + | 0        | 0        | 0.342623 |
| Simple_repeat | Simple_repeat | (A)n      | chr11 | 6688972 6689024 +   | 0.591053 | 0        | 0        |
| LINE          | L1            | L1Md_F2   | chr2  | 10940716 10941244 + | 0        | 0        | 0        |
| SINE          | Alu           | B1_Mm     | chr2  | 10975618 10975633 + | 0        | 0        | 0        |
| Simple_repeat | Simple_repeat | (A)n      | chr2  | 10975633 10975635 + | 0        | 0        | 0        |
| SINE          | Alu           | B1_Mus2   | chr2  | 11100152 11100166 + | 0        | 0        | 0        |
| Simple_repeat | Simple_repeat | (A)n      | chr2  | 11100167 11100169 + | 0        | 0        | 0        |
| Simple_repeat | Simple_repeat | (A)n      | chr2  | 11120432 11120434 + | 0        | 0        | 0        |
| Simple_repeat | Simple_repeat | (A)n      | chr2  | 11203186 11203189 + | 0        | 0        | 0        |
| SINE          | B2            | B2_Mm1a   | chr2  | 11207661 11207680 + | 0        | 0        | 0        |
| LTR           | MaLR          | MTA_Mm    | chr2  | 11229116 11229156 + | 0        | 0        | 0        |
| SINE          | Alu           | B1_Mus2   | chr2  | 11290268 11290283 + | 0        | 0        | 0        |
| Simple_repeat | Simple_repeat | (A)n      | chr2  | 11290283 11290285 + | 0        | 0        | 0        |

|               |               |         |       |                     |          |   |          |
|---------------|---------------|---------|-------|---------------------|----------|---|----------|
| SINE          | Alu           | B1_Mus1 | chr2  | 11518842 11518858 - | 0        | 0 | 0        |
| SINE          | Alu           | B1_Mus1 | chr2  | 11565018 11565033 - | 0        | 0 | 0        |
| SINE          | B2            | B2_Mm1a | chr2  | 11593778 11593797 + | 0        | 0 | 0        |
| Simple_repeat | Simple_repeat | (A)n    | chr2  | 11593797 11593800 + | 0.332194 | 0 | 0        |
| SINE          | Alu           | B1_Mus2 | chr2  | 11601715 11601730 - | 0        | 0 | 0        |
| SINE          | Alu           | B1_Mus1 | chr2  | 11605683 11605697 + | 0        | 0 | 0        |
| Simple_repeat | Simple_repeat | (A)n    | chr2  | 11605697 11605700 + | 0        | 0 | 0        |
| Simple_repeat | Simple_repeat | (CCAA)n | chr2  | 11605700 11605702 + | 0        | 0 | 0        |
| LTR           | MaLR          | MTA_Mm  | chr2  | 11627579 11627619 + | 0        | 0 | 0        |
| Simple_repeat | Simple_repeat | (A)n    | chr2  | 11648495 11648499 + | 0        | 0 | 0        |
| Simple_repeat | Simple_repeat | (A)n    | chr2  | 11664922 11664926 + | 0        | 0 | 0        |
| Simple_repeat | Simple_repeat | (A)n    | chr2  | 11667158 11667160 + | 0        | 0 | 0        |
| LTR           | MaLR          | MTB     | chr2  | 11678037 11678076 - | 0        | 0 | 0        |
| SINE          | Alu           | B1_Mus2 | chr11 | 7527922 7528068 -   | 0        | 0 | 0        |
| Simple_repeat | Simple_repeat | (A)n    | chr2  | 11841873 11841877 + | 0        | 0 | 0        |
| SINE          | Alu           | B1_Mus2 | chr2  | 11868528 11868543 + | 0        | 0 | 0        |
| Simple_repeat | Simple_repeat | (A)n    | chr2  | 11868543 11868546 + | 0.591053 | 0 | 0        |
| SINE          | Alu           | B1_Mus1 | chr2  | 11893766 11893780 + | 0        | 0 | 0        |
| Simple_repeat | Simple_repeat | (A)n    | chr2  | 11893780 11893782 + | 0        | 0 | 0        |
| SINE          | Alu           | B1_Mus1 | chr11 | 7690661 7690807 -   | 0        | 0 | 0        |
| Simple_repeat | Simple_repeat | (A)n    | chr2  | 11931246 11931250 + | 0        | 0 | 0        |
| SINE          | Alu           | B1_Mus2 | chr2  | 11998573 11998586 + | 0        | 0 | 0        |
| SINE          | Alu           | B1_Mus2 | chr2  | 12011767 12011782 - | 0        | 0 | 0        |
| SINE          | B2            | B2_Mm1t | chr2  | 12050799 12050818 - | 0        | 0 | 0        |
| SINE          | Alu           | B1_Mm   | chr2  | 12130431 12130446 + | 0.591053 | 0 | 0        |
| Simple_repeat | Simple_repeat | (TTTA)n | chr2  | 12205936 12205941 + | 0        | 0 | 0        |
| SINE          | Alu           | B1_Mus2 | chr2  | 12229035 12229050 + | 0        | 0 | 0        |
| Simple_repeat | Simple_repeat | (A)n    | chr2  | 12229051 12229062 + | 0        | 0 | 0        |
| LINE          | L1            | L1Md_F2 | chr2  | 12238879 12239505 - | 0        | 0 | 0        |
| SINE          | Alu           | B1_Mus2 | chr2  | 12248636 12248651 - | 0        | 0 | 0        |
| SINE          | Alu           | B1_Mus1 | chr2  | 12364606 12364621 + | 0        | 0 | 0        |
| Simple_repeat | Simple_repeat | (A)n    | chr2  | 12364623 12364629 + | 0        | 0 | 0.342623 |
| LTR           | MaLR          | MTA_Mm  | chr2  | 12396140 12396177 - | 0        | 0 | 0        |
| Simple_repeat | Simple_repeat | (A)n    | chr2  | 12417551 12417555 + | 0        | 0 | 0        |
| SINE          | Alu           | B1_Mm   | chr2  | 12420196 12420211 - | 0        | 0 | 0        |
| LTR           | MaLR          | MTA_Mm  | chr2  | 12430002 12430041 + | 0        | 0 | 0        |
| SINE          | Alu           | B1_Mus2 | chr2  | 12698296 12698311 + | 0        | 0 | 0        |
| Simple_repeat | Simple_repeat | (A)n    | chr2  | 12698311 12698314 + | 0        | 0 | 0        |
| SINE          | Alu           | B1_Mus2 | chr2  | 12750883 12750897 - | 0        | 0 | 0        |
| SINE          | Alu           | B1_Mm   | chr2  | 12851960 12851975 - | 0        | 0 | 0        |
| SINE          | Alu           | B1_Mus2 | chr2  | 12863213 12863227 + | 0        | 0 | 0        |
| Simple_repeat | Simple_repeat | (A)n    | chr2  | 12863228 12863230 + | 0        | 0 | 0        |
| SINE          | Alu           | B1_Mus1 | chr2  | 12897171 12897186 - | 0        | 0 | 0.615324 |
| SINE          | Alu           | B1_Mm   | chr2  | 12898130 12898142 - | 0        | 0 | 0        |
| SINE          | Alu           | B1_Mus1 | chr2  | 12898364 12898378 + | 0        | 0 | 0        |
| Simple_repeat | Simple_repeat | (A)n    | chr2  | 12898378 12898384 + | 0        | 0 | 0        |
| Simple_repeat | Simple_repeat | (A)n    | chr2  | 12901325 12901332 + | 0        | 0 | 0        |
| SINE          | Alu           | B1_Mm   | chr2  | 12962339 12962353 + | 0        | 0 | 0        |
| Simple_repeat | Simple_repeat | (A)n    | chr2  | 12962353 12962356 + | 0        | 0 | 0        |
| SINE          | Alu           | B1_Mm   | chr2  | 12980841 12980855 - | 0        | 0 | 0        |
| SINE          | Alu           | B1_Mus2 | chr2  | 13052506 13052519 + | 0        | 0 | 0        |
| Simple_repeat | Simple_repeat | (A)n    | chr2  | 13052519 13052521 + | 0        | 0 | 0        |
| LTR           | MaLR          | MTA_Mm  | chr2  | 13068516 13068555 + | 0.591053 | 0 | 0        |
| LTR           | MaLR          | MTA_Mm  | chr2  | 13094768 13094808 - | 0        | 0 | 0        |
| LTR           | MaLR          | MTB     | chr2  | 13140538 13140578 + | 0        | 0 | 0        |
| SINE          | Alu           | B1_Mur4 | chr2  | 13199661 13199676 + | 0        | 0 | 0        |
| Simple_repeat | Simple_repeat | (A)n    | chr2  | 13199676 13199679 + | 0        | 0 | 0        |
| LTR           | MaLR          | MTA_Mm  | chr2  | 13224549 13224588 - | 0        | 0 | 0        |
| Simple_repeat | Simple_repeat | (A)n    | chr11 | 9643899 9643933 +   | 0        | 0 | 0        |
| LTR           | MaLR          | MTB     | chr2  | 13249320 13249360 - | 0        | 0 | 0        |
| LINE          | L1            | L1_Mur1 | chr2  | 13414770 13415271 + | 0        | 0 | 0        |
| SINE          | Alu           | B1_Mus2 | chr2  | 13448096 13448110 - | 0        | 0 | 0        |
| LINE          | L1            | L1_Mus3 | chr11 | 10018107 10023288 - | 0        | 0 | 0        |
| Simple_repeat | Simple_repeat | (TTTA)n | chr2  | 13624163 13624166 + | 0        | 0 | 0        |
| LTR           | MaLR          | MTA_Mm  | chr2  | 13634418 13634458 - | 0        | 0 | 0        |
| SINE          | Alu           | B1_Mm   | chr2  | 13649157 13649171 + | 0        | 0 | 0        |
| Simple_repeat | Simple_repeat | (A)n    | chr2  | 13649172 13649175 + | 0        | 0 | 0        |



|                |                |          |       |          |            |          |          |          |
|----------------|----------------|----------|-------|----------|------------|----------|----------|----------|
| Simple_repeat  | Simple_repeat  | (A)n     | chr2  | 13690005 | 13690009 + | 0        | 0        | 0        |
| SINE           | Alu            | B1_Mus2  | chr2  | 13737192 | 13737207 + | 0        | 0        | 0        |
| SINE           | Alu            | B1_Mm    | chr2  | 13740380 | 13740394 + | 0        | 0        | 0        |
| Simple_repeat  | Simple_repeat  | (A)n     | chr2  | 13740395 | 13740400 + | 0        | 0        | 0        |
| Simple_repeat  | Simple_repeat  | (A)n     | chr2  | 13748758 | 13748763 + | 0        | 0        | 0        |
| SINE           | Alu            | B1_Mus1  | chr2  | 13811494 | 13811504 - | 0        | 0        | 0        |
| Simple_repeat  | Simple_repeat  | (A)n     | chr2  | 13815568 | 13815572 + | 0        | 0        | 0        |
| LTR            | MaLR           | MTA_Mm   | chr11 | 10291426 | 10291815 - | 0        | 0        | 0        |
| Simple_repeat  | Simple_repeat  | (A)n     | chr2  | 13859401 | 13859407 + | 0        | 0.708814 | 0        |
| SINE           | Alu            | B1_Mus2  | chr2  | 13877274 | 13877289 - | 0        | 0        | 0        |
| SINE           | B2             | B2_Mm1a  | chr2  | 13993125 | 13993145 + | 0        | 0        | 0        |
| LTR            | MaLR           | MTA_Mm   | chr11 | 10540093 | 10540488 - | 0.591053 | 0        | 0        |
| SINE           | Alu            | B1_Mus2  | chr11 | 10550131 | 10550277 + | 0        | 0        | 0        |
| Simple_repeat  | Simple_repeat  | (A)n     | chr11 | 10550278 | 10550305 + | 0        | 0.708814 | 0        |
| SINE           | Alu            | B1_Mus2  | chr2  | 14274505 | 14274520 - | 0        | 0        | 0        |
| Simple_repeat  | Simple_repeat  | (A)n     | chr2  | 14303284 | 14303288 + | 0        | 0        | 0        |
| Simple_repeat  | Simple_repeat  | (A)n     | chr2  | 14315218 | 14315221 + | 0        | 0        | 0        |
| LINE           | L1             | Lx       | chr10 | 17612750 | 17617503 - | 0.591053 | 1.41763  | 0.342623 |
| SINE           | Alu            | B1_Mus2  | chr2  | 14365152 | 14365166 - | 0        | 0        | 0        |
| SINE           | Alu            | B1_Mm    | chr2  | 14402384 | 14402398 + | 0        | 0        | 0.342623 |
| Simple_repeat  | Simple_repeat  | (A)n     | chr2  | 14402398 | 14402401 + | 0        | 0        | 0        |
| Simple_repeat  | Simple_repeat  | (A)n     | chr11 | 10910239 | 10910272 + | 0        | 0        | 0        |
| SINE           | Alu            | B1_Mm    | chr2  | 14416566 | 14416581 - | 0        | 0        | 0        |
| SINE           | Alu            | B1_Mm    | chr2  | 14417469 | 14417483 - | 0        | 0        | 0        |
| SINE           | Alu            | B1_Mus2  | chr2  | 14423528 | 14423542 - | 0        | 0        | 0        |
| SINE           | Alu            | B1_Mus1  | chr2  | 14424160 | 14424174 - | 0        | 0        | 0        |
| SINE           | Alu            | B1_Mus2  | chr2  | 14497841 | 14497855 - | 0        | 0        | 0        |
| LTR            | MaLR           | MTA_Mm   | chr2  | 14558792 | 14558832 - | 0        | 0        | 0        |
| SINE           | Alu            | B1_Mus1  | chr2  | 14661634 | 14661651 + | 0        | 0        | 0        |
| Simple_repeat  | Simple_repeat  | (A)n     | chr2  | 14661651 | 14661655 + | 0        | 0        | 0        |
| SINE           | Alu            | B1_Mus2  | chr2  | 14667110 | 14667125 - | 0        | 0        | 0        |
| LTR            | MaLR           | MTA_Mm   | chr2  | 14761006 | 14761045 + | 0        | 0        | 0        |
| SINE           | Alu            | B1_Mur2  | chr2  | 14779754 | 14779770 - | 0        | 0        | 0        |
| SINE           | Alu            | B1_Mm    | chr2  | 14815542 | 14815557 + | 0        | 0        | 0        |
| Simple_repeat  | Simple_repeat  | (A)n     | chr2  | 14823546 | 14823550 + | 0.332194 | 0        | 0.342623 |
| Simple_repeat  | Simple_repeat  | (A)n     | chr2  | 14846740 | 14846745 + | 0        | 0        | 0        |
| Simple_repeat  | Simple_repeat  | (A)n     | chr2  | 14938288 | 14938292 + | 0        | 0        | 0        |
| SINE           | Alu            | B1_Mus2  | chr2  | 14941085 | 14941099 - | 0        | 0        | 0.615324 |
| SINE           | Alu            | B1_Mm    | chr2  | 15011423 | 15011437 - | 0        | 0        | 0        |
| SINE           | Alu            | B1_Mm    | chr2  | 15012728 | 15012742 + | 0        | 0        | 0        |
| Simple_repeat  | Simple_repeat  | (A)n     | chr2  | 15012742 | 15012746 + | 0        | 0        | 0        |
| Simple_repeat  | Simple_repeat  | (A)n     | chr11 | 11575224 | 11575262 + | 0.332194 | 0        | 0        |
| SINE           | Alu            | B1_Mm    | chr2  | 15019380 | 15019395 - | 0        | 0        | 0        |
| SINE           | Alu            | B1_Mus2  | chr2  | 15021270 | 15021285 - | 0.591053 | 0        | 1.23065  |
| SINE           | Alu            | B1_Mus2  | chr2  | 15031425 | 15031439 - | 0        | 0        | 0        |
| SINE           | Alu            | B1_Mm    | chr2  | 15032348 | 15032363 - | 0.923247 | 1.08938  | 0        |
| LINE           | L1             | L1Md_T   | chr2  | 15032927 | 15033462 - | 0        | 0        | 0        |
| SINE           | Alu            | B1_Mm    | chr2  | 15035541 | 15035556 - | 0        | 0        | 0        |
| SINE           | Alu            | B1_Mm    | chr11 | 11678180 | 11678329 - | 0        | 0        | 0        |
| LTR            | MaLR           | MTA_Mm   | chr2  | 15157071 | 15157110 + | 0        | 0        | 0.342623 |
| SINE           | Alu            | B1_Mm    | chr11 | 11818442 | 11818587 - | 0        | 0        | 0        |
| SINE           | Alu            | B1_Mus2  | chr2  | 15259138 | 15259151 + | 0        | 0        | 0        |
| Simple_repeat  | Simple_repeat  | (A)n     | chr2  | 15259152 | 15259155 + | 0        | 0        | 0        |
| SINE           | Alu            | B1_Mur3  | chr2  | 15310696 | 15310707 + | 0        | 0        | 0        |
| Low_complexity | Low_complexity | A-rich   | chr2  | 15310707 | 15310714 + | 0        | 0        | 0        |
| Simple_repeat  | Simple_repeat  | (TTTTA)n | chr2  | 15341450 | 15341454 + | 0        | 0        | 0        |
| Simple_repeat  | Simple_repeat  | (A)n     | chr2  | 15341501 | 15341504 + | 0        | 0        | 0.342623 |
| SINE           | Alu            | B1_Mus2  | chr2  | 15344158 | 15344172 + | 0        | 0        | 0        |
| Simple_repeat  | Simple_repeat  | (A)n     | chr2  | 15344172 | 15344175 + | 0        | 0        | 0        |
| SINE           | Alu            | B1_Mus2  | chr2  | 15353440 | 15353455 - | 0        | 0        | 0        |
| Simple_repeat  | Simple_repeat  | (A)n     | chr2  | 15392021 | 15392025 + | 0        | 0        | 0        |
| Simple_repeat  | Simple_repeat  | (A)n     | chr2  | 15412958 | 15412962 + | 0        | 0        | 0        |
| SINE           | Alu            | B1_Mus2  | chr11 | 12416163 | 12416309 - | 0        | 0        | 0        |
| SINE           | Alu            | B1_Mm    | chr2  | 15672103 | 15672118 - | 0        | 0        | 0        |
| SINE           | Alu            | B1_Mus1  | chr2  | 15683367 | 15683381 + | 0        | 0        | 0        |
| Simple_repeat  | Simple_repeat  | (A)n     | chr2  | 15683381 | 15683384 + | 0        | 0        | 0        |
| SINE           | Alu            | B1_Mus2  | chr2  | 15742319 | 15742333 + | 0        | 0        | 0        |

|               |               |         |       |                     |          |          |          |
|---------------|---------------|---------|-------|---------------------|----------|----------|----------|
| Simple_repeat | Simple_repeat | (A)n    | chr2  | 15742333 15742336 + | 0        | 0        | 0        |
| Simple_repeat | Simple_repeat | (A)n    | chr2  | 15755182 15755188 + | 0        | 0        | 1.10507  |
| SINE          | Alu           | B1_Mm   | chr2  | 15779858 15779873 + | 0        | 0        | 0        |
| Simple_repeat | Simple_repeat | (A)n    | chr2  | 15779873 15779876 + | 0        | 0        | 0        |
| LTR           | MaLR          | MTA_Mm  | chr11 | 12807604 12807999 - | 0        | 0        | 0        |
| LTR           | MaLR          | MTA_Mm  | chr11 | 12957698 12958090 + | 0        | 0        | 0.615324 |
| SINE          | Alu           | B1_Mus1 | chr2  | 15921201 15921216 - | 0        | 0        | 0        |
| SINE          | Alu           | B1_Mus2 | chr11 | 13068885 13069030 + | 0        | 0        | 0        |
| Simple_repeat | Simple_repeat | (A)n    | chr11 | 13069031 13069058 + | 0        | 0        | 0        |
| SINE          | Alu           | B1_Mm   | chr2  | 16013381 16013396 - | 0        | 0        | 0        |
| Simple_repeat | Simple_repeat | (A)n    | chr2  | 16035486 16035490 + | 0        | 0        | 0        |
| Simple_repeat | Simple_repeat | (A)n    | chr2  | 16036974 16036977 + | 0        | 0        | 0        |
| SINE          | Alu           | B1_Mus1 | chr2  | 16040315 16040333 - | 0        | 0        | 0        |
| LTR           | MaLR          | MTA_Mm  | chr10 | 3125491 3125864 +   | 0        | 0        | 0        |
| Simple_repeat | Simple_repeat | (A)n    | chr2  | 16105492 16105496 + | 0        | 0        | 0        |
| SINE          | Alu           | B1_Mm   | chr2  | 16108704 16108719 + | 0        | 0        | 0        |
| Simple_repeat | Simple_repeat | (A)n    | chr2  | 16108719 16108725 + | 0        | 0        | 0        |
| SINE          | Alu           | B1_Mus2 | chr11 | 13355751 13355897 - | 0        | 0        | 0        |
| Simple_repeat | Simple_repeat | (A)n    | chr2  | 16261470 16261473 + | 0        | 0        | 0        |
| SINE          | Alu           | B1_Mus1 | chr11 | 13454360 13454507 - | 0        | 0        | 0        |
| SINE          | Alu           | B1_Mus1 | chr2  | 16344712 16344727 + | 0        | 0        | 0        |
| Simple_repeat | Simple_repeat | (A)n    | chr2  | 16344727 16344731 + | 0        | 0        | 0        |
| SINE          | Alu           | B1_Mus1 | chr2  | 16347211 16347226 + | 0        | 0        | 0        |
| Simple_repeat | Simple_repeat | (A)n    | chr2  | 16347226 16347229 + | 0.332194 | 0        | 0        |
| Simple_repeat | Simple_repeat | (A)n    | chr11 | 13591820 13591873 + | 0        | 0        | 0        |
| SINE          | Alu           | B1_Mm   | chr2  | 16451653 16451668 - | 0        | 0        | 0        |
| LTR           | MaLR          | MTA_Mm  | chr11 | 13941232 13941570 + | 0        | 0        | 0        |
| SINE          | Alu           | B1_Mm   | chr2  | 16616066 16616080 - | 0        | 0        | 0        |
| SINE          | Alu           | B1_Mus2 | chr2  | 16638083 16638098 - | 0        | 0        | 0        |
| SINE          | Alu           | B1_Mur4 | chr2  | 16659387 16659400 - | 0        | 0        | 0        |
| SINE          | Alu           | B1_Mm   | chr2  | 16659760 16659775 - | 0        | 0        | 0        |
| SINE          | Alu           | B1_Mus2 | chr2  | 16661371 16661385 + | 0        | 0        | 0        |
| Simple_repeat | Simple_repeat | (A)n    | chr2  | 16702301 16702303 + | 0.923247 | 0        | 0.615324 |
| SINE          | Alu           | B1_Mus2 | chr2  | 16722073 16722088 + | 0        | 0        | 0        |
| Simple_repeat | Simple_repeat | (A)n    | chr2  | 16722088 16722090 + | 0        | 0        | 0        |
| SINE          | Alu           | B1_Mus2 | chr2  | 16746072 16746088 - | 0        | 0        | 0        |
| SINE          | Alu           | B1_Mus1 | chr2  | 16750737 16750751 - | 0        | 0        | 0        |
| SINE          | Alu           | B1_Mur1 | chr2  | 16807432 16807447 - | 0        | 0        | 0        |
| Simple_repeat | Simple_repeat | (A)n    | chr2  | 16813283 16813285 + | 0        | 0        | 0        |
| SINE          | Alu           | B1_Mus2 | chr2  | 16813707 16813721 + | 0        | 0        | 0        |
| Simple_repeat | Simple_repeat | (A)n    | chr2  | 16813721 16813724 + | 0        | 0        | 0        |
| LINE          | L1            | L1_Mus2 | chr11 | 14359886 14365793 - | 0        | 0        | 0        |
| SINE          | B2            | B2_Mm1a | chr2  | 16861489 16861509 - | 0        | 0        | 0        |
| SINE          | Alu           | B1_Mm   | chr2  | 16865160 16865173 + | 0        | 0        | 0        |
| Simple_repeat | Simple_repeat | (A)n    | chr2  | 16865173 16865175 + | 0        | 0        | 0        |
| SINE          | B2            | B2_Mm1a | chr2  | 16873979 16873998 - | 0        | 0.380568 | 0        |
| SINE          | Alu           | B1_Mus1 | chr2  | 16878874 16878889 - | 0        | 0        | 0        |
| Simple_repeat | Simple_repeat | (A)n    | chr2  | 16980293 16980300 + | 0        | 0        | 0        |
| SINE          | Alu           | B1_Mus2 | chr2  | 16996857 16996871 - | 0        | 0        | 0        |
| Simple_repeat | Simple_repeat | (A)n    | chr2  | 17029551 17029554 + | 0        | 0        | 0        |
| Simple_repeat | Simple_repeat | (A)n    | chr11 | 14699506 14699544 + | 0        | 0        | 0        |
| LTR           | MaLR          | MTA_Mm  | chr2  | 17180948 17180988 + | 0        | 0        | 0        |
| SINE          | Alu           | B1_Mus2 | chr2  | 17191143 17191158 + | 0.664388 | 0        | 0        |
| Simple_repeat | Simple_repeat | (A)n    | chr2  | 17191158 17191160 + | 0        | 0        | 0        |
| Simple_repeat | Simple_repeat | (A)n    | chr2  | 17199403 17199407 + | 0        | 0        | 0        |
| SINE          | Alu           | B1_Mus2 | chr2  | 17214545 17214560 - | 0        | 0        | 0        |
| SINE          | Alu           | PB1D10  | chr2  | 17248138 17248149 + | 0        | 0        | 0        |
| Simple_repeat | Simple_repeat | (A)n    | chr2  | 17248150 17248154 + | 0        | 0        | 0        |
| SINE          | B2            | B2_Mm1a | chr2  | 17279389 17279408 + | 0        | 0        | 0        |
| SINE          | B4            | ID_B1   | chr2  | 17291539 17291560 - | 0        | 0        | 0        |
| LTR           | MaLR          | MTA_Mm  | chr2  | 17370505 17370543 + | 0        | 0        | 0        |
| Simple_repeat | Simple_repeat | (A)n    | chr11 | 15149916 15149951 + | 0        | 0        | 0        |
| SINE          | Alu           | B1_Mm   | chr2  | 17407601 17407615 + | 0        | 0        | 0        |
| SINE          | Alu           | B1_Mm   | chr2  | 17458461 17458475 + | 0        | 0        | 0        |
| Simple_repeat | Simple_repeat | (A)n    | chr2  | 17458475 17458477 + | 0        | 0        | 0        |
| LTR           | MaLR          | MTA_Mm  | chr2  | 17473586 17473624 + | 0        | 0        | 0        |
| SINE          | Alu           | B1_Mus1 | chr2  | 17488092 17488106 + | 0        | 0        | 0        |

|                |                |           |       |                     |          |          |          |
|----------------|----------------|-----------|-------|---------------------|----------|----------|----------|
| Simple_repeat  | Simple_repeat  | (A)n      | chr2  | 17488106 17488110 + | 0        | 0        | 0        |
| SINE           | Alu            | B1_Mus2   | chr2  | 17548966 17548981 - | 0        | 0        | 0        |
| SINE           | Alu            | B1_Mus2   | chr2  | 17550934 17550949 + | 0.591053 | 0        | 0        |
| SINE           | Alu            | B1_Mus2   | chr11 | 15371734 15371880 + | 0        | 0        | 0        |
| Simple_repeat  | Simple_repeat  | (A)n      | chr11 | 15371881 15371903 + | 0        | 0        | 0        |
| SINE           | Alu            | B1_Mus1   | chr2  | 17687749 17687763 - | 0        | 0        | 0.615324 |
| SINE           | Alu            | B1_Mus2   | chr2  | 17713380 17713394 + | 0        | 0        | 0        |
| SINE           | Alu            | B1_Mus2   | chr2  | 17720426 17720441 - | 0        | 0        | 0        |
| SINE           | Alu            | B1_Mus2   | chr2  | 17745319 17745334 - | 0        | 0        | 0        |
| SINE           | Alu            | B1_Mus2   | chr2  | 17747260 17747274 + | 0        | 0        | 0        |
| Simple_repeat  | Simple_repeat  | (A)n      | chr2  | 17747274 17747278 + | 0        | 0        | 0        |
| SINE           | Alu            | B1_Mus2   | chr2  | 17753013 17753027 + | 0        | 0        | 0        |
| SINE           | Alu            | B1_Mus2   | chr2  | 17758654 17758668 - | 0        | 0        | 0        |
| Simple_repeat  | Simple_repeat  | (A)n      | chr2  | 17767373 17767377 + | 0        | 0        | 0        |
| Simple_repeat  | Simple_repeat  | (A)n      | chr11 | 15628316 15628362 + | 0        | 0        | 0        |
| LINE           | L1             | L1Md_F2   | chr2  | 17888592 17889132 + | 0        | 0        | 0        |
| Simple_repeat  | Simple_repeat  | (A)n      | chr2  | 17903889 17903892 + | 0        | 0        | 0        |
| LTR            | MaLR           | MTA_Mm    | chr2  | 17905205 17905244 + | 0        | 0        | 0        |
| Simple_repeat  | Simple_repeat  | (A)n      | chr11 | 15765076 15765127 + | 0        | 0        | 0        |
| Simple_repeat  | Simple_repeat  | (A)n      | chr11 | 15793213 15793251 + | 0        | 0        | 0        |
| SINE           | Alu            | B1_Mus2   | chr2  | 18045409 18045423 - | 0        | 0        | 0        |
| SINE           | B2             | B2_Mm1t   | chr2  | 18143466 18143486 + | 0        | 0        | 0        |
| LTR            | MaLR           | MTA_Mm    | chr10 | 4599525 4599922 -   | 0        | 0        | 0        |
| LTR            | MaLR           | MTA_Mm    | chr10 | 18002760 18003137 - | 0        | 0        | 0        |
| LTR            | MaLR           | MTA_Mm    | chr3  | 3678720 3679115 -   | 0        | 0        | 0        |
| LINE           | L1             | L1Md_T    | chr3  | 4164192 4170853 -   | 0        | 0        | 0        |
| Simple_repeat  | Simple_repeat  | (A)n      | chr3  | 4447388 4447436 +   | 0        | 0        | 0        |
| LTR            | MaLR           | MTA_Mm    | chr11 | 16225227 16225624 - | 0        | 0        | 0        |
| LINE           | L1             | L1_Mus1   | chr3  | 6188692 6194794 +   | 0.591053 | 0        | 0        |
| SINE           | Alu            | B1_Mus2   | chr3  | 6219439 6219585 +   | 0        | 0        | 0        |
| Simple_repeat  | Simple_repeat  | (A)n      | chr3  | 6219586 6219620 +   | 0        | 0        | 0        |
| LTR            | MaLR           | MTA_Mm    | chr3  | 6265004 6265398 -   | 0        | 0        | 0        |
| SINE           | Alu            | B1_Mus2   | chr3  | 6436386 6436531 +   | 0        | 0        | 0        |
| Low_complexity | Low_complexity | A-rich    | chr3  | 6436532 6436624 +   | 0        | 0        | 0        |
| SINE           | Alu            | B1_Mus2   | chr3  | 6760274 6760418 +   | 0        | 0        | 0        |
| Simple_repeat  | Simple_repeat  | (A)n      | chr3  | 6760419 6760499 +   | 0        | 0        | 0        |
| Simple_repeat  | Simple_repeat  | (A)n      | chr3  | 6785486 6785537 +   | 0        | 0        | 0        |
| SINE           | Alu            | B1_Mus2   | chr3  | 6957704 6957812 +   | 0        | 0        | 0        |
| Simple_repeat  | Simple_repeat  | (A)n      | chr3  | 6957813 6957844 +   | 0        | 0        | 0        |
| Simple_repeat  | Simple_repeat  | (A)n      | chr3  | 6959282 6959328 +   | 0        | 0        | 0        |
| Simple_repeat  | Simple_repeat  | (A)n      | chr3  | 7010425 7010470 +   | 0        | 0        | 0        |
| SINE           | Alu            | B1_Mm     | chr11 | 16437726 16437869 - | 0        | 0        | 0        |
| SINE           | Alu            | B1_Mus1   | chr3  | 8232960 8233105 +   | 0        | 0        | 0        |
| Simple_repeat  | Simple_repeat  | (A)n      | chr3  | 8233106 8233130 +   | 0        | 0        | 0        |
| SINE           | Alu            | B1_Mus1   | chr3  | 8245571 8245718 +   | 0        | 0        | 0        |
| Simple_repeat  | Simple_repeat  | (CAAAAC)n | chr3  | 8245747 8245769 +   | 0.591053 | 0        | 0.615324 |
| Simple_repeat  | Simple_repeat  | (A)n      | chr11 | 16477999 16478036 + | 0        | 0        | 0        |
| LINE           | L1             | L1Md_F2   | chr3  | 8330527 8335703 +   | 0        | 0        | 0        |
| LTR            | MaLR           | MTA_Mm    | chr3  | 8651898 8652278 +   | 0        | 0        | 0        |
| SINE           | Alu            | B1_Mus2   | chr3  | 9011506 9011617 +   | 0        | 0        | 0        |
| SINE           | Alu            | B1_Mur4   | chr3  | 9241405 9241544 +   | 0        | 0        | 0        |
| Simple_repeat  | Simple_repeat  | (A)n      | chr3  | 9241545 9241603 +   | 0        | 0        | 0        |
| LTR            | MaLR           | MTA_Mm    | chr3  | 9416687 9417072 -   | 0        | 0.380568 | 0        |
| LTR            | MaLR           | MTA_Mm    | chr3  | 10073766 10074161 - | 0        | 0        | 0        |
| Simple_repeat  | Simple_repeat  | (A)n      | chr3  | 10097278 10097305 + | 0        | 0        | 0        |
| SINE           | Alu            | B1_Mus1   | chr3  | 10134119 10134264 - | 0        | 0        | 0        |
| SINE           | Alu            | B1_Mus2   | chr3  | 10151987 10152132 - | 0        | 0        | 0        |
| SINE           | Alu            | B1_Mus1   | chr3  | 10824527 10824671 + | 0        | 0        | 0        |
| Simple_repeat  | Simple_repeat  | (A)n      | chr3  | 10824672 10824703 + | 0        | 0        | 0        |
| LTR            | MaLR           | MTA_Mm    | chr3  | 11012719 11013112 + | 0        | 0        | 0        |
| LINE           | L1             | L1Md_F2   | chr3  | 11367351 11372700 + | 0        | 0        | 0        |
| Simple_repeat  | Simple_repeat  | (A)n      | chr3  | 11615025 11615049 + | 0        | 0        | 0        |
| Simple_repeat  | Simple_repeat  | (A)n      | chr3  | 11729266 11729329 + | 0        | 0        | 0        |
| LTR            | MaLR           | MTA_Mm    | chr3  | 12113117 12113504 - | 0        | 0        | 0        |
| LINE           | L1             | L1Md_F2   | chr3  | 12619618 12625330 + | 0        | 0        | 0        |
| SINE           | Alu            | B1_Mus1   | chr3  | 12672844 12672990 + | 0        | 0        | 0        |
| Simple_repeat  | Simple_repeat  | (A)n      | chr3  | 12672991 12673014 + | 0        | 0        | 0        |

|                |                |         |       |                     |          |          |          |
|----------------|----------------|---------|-------|---------------------|----------|----------|----------|
| LTR            | MaLR           | MTA_Mm  | chr3  | 12887285 12887679 - | 0        | 0        | 0        |
| SINE           | Alu            | B1_Mus1 | chr3  | 12941557 12941703 + | 0        | 0        | 0        |
| Simple_repeat  | Simple_repeat  | (A)n    | chr3  | 13352572 13352607 + | 0        | 0.380568 | 0        |
| LTR            | MaLR           | MTA_Mm  | chr3  | 15189734 15190130 + | 0        | 0        | 0        |
| Simple_repeat  | Simple_repeat  | (A)n    | chr3  | 15693803 15693843 + | 0        | 0        | 0        |
| Simple_repeat  | Simple_repeat  | (A)n    | chr3  | 15752839 15752924 + | 0        | 0        | 0.615324 |
| LINE           | L1             | L1Md_T  | chr3  | 15822545 15829064 - | 0        | 0        | 0        |
| SINE           | Alu            | B1_Mm   | chr3  | 16043126 16043272 + | 0        | 0        | 0        |
| LTR            | ERVVK          | RMER13A | chr3  | 16762314 16763095 - | 0        | 0        | 0        |
| Simple_repeat  | Simple_repeat  | (A)n    | chr3  | 16881572 16881639 + | 0.827951 | 0        | 0        |
| LINE           | L1             | L1Md_F2 | chr3  | 17413654 17419583 + | 0        | 0        | 0        |
| LTR            | MaLR           | MTA_Mm  | chr3  | 17810628 17811014 + | 0        | 0        | 0        |
| SINE           | Alu            | B1_Mm   | chr3  | 18262571 18262717 - | 0        | 0        | 0        |
| LINE           | L1             | L1_Mus1 | chr3  | 18304422 18310872 + | 0        | 0        | 0        |
| Low_complexity | Low_complexity | CT-rich | chr3  | 19314608 19314658 + | 0        | 0        | 0        |
| LTR            | MaLR           | MTA_Mm  | chr3  | 19702274 19702657 + | 0        | 0        | 0        |
| LTR            | MaLR           | MTA_Mm  | chr10 | 18099028 18099424 - | 0        | 0        | 0        |
| LTR            | MaLR           | MTA_Mm  | chr3  | 20196444 20196838 - | 0        | 0        | 0        |
| SINE           | Alu            | B1_Mm   | chr3  | 20461059 20461205 - | 0        | 0        | 0        |
| LTR            | MaLR           | MTA_Mm  | chr3  | 20688518 20688890 - | 0        | 0        | 0        |
| SINE           | Alu            | B1_Mus2 | chr3  | 20805125 20805272 - | 0        | 0        | 0        |
| SINE           | Alu            | B1_Mm   | chr3  | 20950943 20951099 + | 1.18211  | 0.708814 | 0.342623 |
| Simple_repeat  | Simple_repeat  | (A)n    | chr3  | 20951100 20951123 + | 1.18211  | 0        | 0        |
| LTR            | MaLR           | MTEa    | chr3  | 21188701 21189042 + | 0        | 0        | 0        |
| SINE           | B4             | B4      | chr3  | 21594385 21594677 + | 0        | 0        | 0        |
| SINE           | Alu            | B1_Mus1 | chr3  | 21778822 21778969 + | 0        | 0        | 0        |
| Simple_repeat  | Simple_repeat  | (A)n    | chr3  | 21778970 21778993 + | 0        | 0        | 0        |
| SINE           | Alu            | B1_Mus2 | chr3  | 21801481 21801627 - | 0        | 0        | 0        |
| Simple_repeat  | Simple_repeat  | (A)n    | chr3  | 22120588 22120649 + | 0.591053 | 0.708814 | 0        |
| LINE           | L1             | L1Md_A  | chr3  | 22347096 22352613 - | 0        | 0        | 0        |
| LINE           | L1             | L1Md_T  | chr3  | 22352630 22359509 - | 0.591053 | 0        | 0        |
| LINE           | L1             | L1Md_F2 | chr3  | 22588804 22595023 - | 0        | 0        | 0        |
| SINE           | B2             | B2_Mm1t | chr11 | 17875355 17875546 + | 0        | 0        | 0        |
| Simple_repeat  | Simple_repeat  | (A)n    | chr11 | 17875547 17875583 + | 0.332194 | 0        | 1.4477   |
| LINE           | L1             | L1Md_T  | chr3  | 22906497 22914001 - | 0        | 0        | 0        |
| Simple_repeat  | Simple_repeat  | (A)n    | chr3  | 23742220 23742244 + | 0        | 0        | 0        |
| LTR            | MaLR           | MTA_Mm  | chr3  | 23803971 23804364 - | 0        | 0        | 0        |
| Simple_repeat  | Simple_repeat  | (A)n    | chr3  | 24179577 24179610 + | 0        | 0        | 0        |
| Simple_repeat  | Simple_repeat  | (A)n    | chr3  | 24232475 24232509 + | 18.3018  | 11.2056  | 11.6282  |
| Simple_repeat  | Simple_repeat  | (A)n    | chr3  | 24446038 24446100 + | 0        | 0        | 0        |
| SINE           | Alu            | B1_Mus2 | chr3  | 24472456 24472602 + | 0        | 0        | 0        |
| Simple_repeat  | Simple_repeat  | (A)n    | chr3  | 24472603 24472626 + | 0        | 0        | 0        |
| LTR            | MaLR           | MTA_Mm  | chr3  | 24585102 24585496 - | 0        | 0        | 0        |
| Simple_repeat  | Simple_repeat  | (A)n    | chr3  | 24808479 24808508 + | 0        | 0        | 0        |
| SINE           | Alu            | B1_Mus2 | chr3  | 27755964 27756110 - | 0        | 0        | 0        |
| Simple_repeat  | Simple_repeat  | (TTTA)n | chr3  | 28041748 28041778 + | 0        | 0        | 0        |
| SINE           | Alu            | B1_Mus1 | chr11 | 18518995 18519133 - | 0        | 0        | 0        |
| Simple_repeat  | Simple_repeat  | (A)n    | chr3  | 28639858 28639896 + | 0        | 0        | 0        |
| LINE           | L1             | L1Md_T  | chr3  | 29765054 29771712 - | 0        | 0        | 0        |
| Simple_repeat  | Simple_repeat  | (A)n    | chr3  | 29827882 29827902 + | 0        | 0        | 0        |
| Simple_repeat  | Simple_repeat  | (A)n    | chr3  | 30413765 30413794 + | 0        | 0        | 0        |
| LTR            | MaLR           | MTA_Mm  | chr3  | 30462654 30462977 + | 0        | 0        | 0        |
| SINE           | Alu            | B1_Mus1 | chr3  | 30796189 30796326 - | 0.591053 | 0        | 0.342623 |
| Simple_repeat  | Simple_repeat  | (A)n    | chr3  | 31509047 31509094 + | 0        | 0        | 0        |
| LTR            | MaLR           | MTA_Mm  | chr3  | 31738383 31738778 + | 0        | 0        | 0        |
| SINE           | Alu            | B1_Mus2 | chr3  | 32294676 32294812 + | 0        | 0        | 0        |
| Simple_repeat  | Simple_repeat  | (A)n    | chr3  | 32294813 32294838 + | 0        | 0        | 0        |
| SINE           | Alu            | B1_Mus1 | chr3  | 33487701 33487849 - | 0        | 0        | 0        |
| SINE           | Alu            | B1_Mus2 | chr3  | 34617241 34617387 + | 0        | 0        | 0        |
| SINE           | Alu            | B1_Mus1 | chr3  | 34940470 34940616 - | 0.591053 | 0        | 0        |
| Simple_repeat  | Simple_repeat  | (A)n    | chr3  | 34977271 34977331 + | 0        | 0        | 0        |
| Simple_repeat  | Simple_repeat  | (A)n    | chr3  | 36246418 36246449 + | 0        | 0        | 0        |
| LTR            | MaLR           | MTA_Mm  | chr3  | 36656824 36657205 + | 0        | 0        | 0        |
| LTR            | MaLR           | MTA_Mm  | chr3  | 36658297 36658678 + | 0        | 0        | 0        |
| LTR            | MaLR           | MTA_Mm  | chr3  | 37481266 37481671 + | 0        | 0        | 0.615324 |
| LTR            | MaLR           | MTA_Mm  | chr10 | 18284560 18284939 + | 0        | 0        | 0        |
| SINE           | Alu            | B1_Mus1 | chr3  | 38764013 38764163 - | 0        | 0        | 0        |

|                |                |          |       |                     |          |          |          |
|----------------|----------------|----------|-------|---------------------|----------|----------|----------|
| SINE           | Alu            | B1_Mus2  | chr3  | 38769792 38769937 - | 0        | 0        | 0        |
| Simple_repeat  | Simple_repeat  | (A)n     | chr3  | 39045673 39045699 + | 0        | 0        | 0        |
| SINE           | Alu            | B1_Mm    | chr3  | 39303477 39303622 - | 0        | 0        | 0        |
| Simple_repeat  | Simple_repeat  | (A)n     | chr3  | 39390451 39390485 + | 0        | 0        | 0        |
| LTR            | MaLR           | MTA_Mm   | chr3  | 40861330 40861694 + | 0        | 0        | 0        |
| LINE           | L1             | L1Md_F2  | chr3  | 41594751 41599914 + | 0        | 0.708814 | 0.342623 |
| LTR            | MaLR           | MTA_Mm   | chr3  | 41655818 41656212 - | 0.332194 | 0        | 0        |
| SINE           | Alu            | B1_Mm    | chr11 | 19931275 19931419 - | 0        | 0        | 0        |
| SINE           | Alu            | B1_Mus2  | chr11 | 19955126 19955272 - | 0        | 0        | 0        |
| Simple_repeat  | Simple_repeat  | (A)n     | chr3  | 42986291 42986334 + | 0.591053 | 0        | 0        |
| Simple_repeat  | Simple_repeat  | (A)n     | chr3  | 43098577 43098642 + | 0        | 0        | 0        |
| Simple_repeat  | Simple_repeat  | (A)n     | chr3  | 43159367 43159402 + | 0        | 0        | 0        |
| LTR            | MaLR           | MTA_Mm   | chr3  | 43515394 43515788 + | 0.332194 | 0.708814 | 0.866667 |
| Simple_repeat  | Simple_repeat  | (A)n     | chr3  | 43787145 43787175 + | 0        | 0        | 0        |
| Simple_repeat  | Simple_repeat  | (A)n     | chr3  | 44133411 44133438 + | 0        | 0        | 0        |
| SINE           | Alu            | B1_Mur3  | chr11 | 20044190 20044337 - | 0.591053 | 0        | 0        |
| SINE           | Alu            | B1_Mus2  | chr3  | 44555441 44555595 - | 0        | 0        | 0        |
| LINE           | L1             | L1Md_F2  | chr3  | 44730975 44737160 - | 0        | 0        | 0        |
| Simple_repeat  | Simple_repeat  | (A)n     | chr3  | 44851511 44851561 + | 0        | 0        | 0        |
| Simple_repeat  | Simple_repeat  | (A)n     | chr3  | 44991437 44991478 + | 0        | 0        | 0        |
| LTR            | MaLR           | MTA_Mm   | chr3  | 45314976 45315367 - | 0        | 0        | 0        |
| LTR            | MaLR           | MTA_Mm   | chr3  | 45321646 45322040 + | 0        | 0        | 0        |
| Simple_repeat  | Simple_repeat  | (A)n     | chr3  | 45468770 45468813 + | 0        | 0        | 0        |
| Simple_repeat  | Simple_repeat  | (A)n     | chr3  | 46114710 46114744 + | 0        | 0        | 0        |
| Simple_repeat  | Simple_repeat  | (A)n     | chr3  | 46172366 46172410 + | 0        | 0        | 0        |
| SINE           | Alu            | B1_Mus2  | chr3  | 46254464 46254606 + | 0        | 0        | 0        |
| Simple_repeat  | Simple_repeat  | (A)n     | chr3  | 46670281 46670378 + | 0.332194 | 0        | 0        |
| SINE           | Alu            | B1_Mus1  | chr3  | 46801879 46802023 + | 0        | 0        | 0        |
| Simple_repeat  | Simple_repeat  | (A)n     | chr3  | 46802024 46802046 + | 0        | 0        | 0        |
| SINE           | Alu            | B1_Mus1  | chr3  | 47001791 47001937 - | 0        | 0        | 0        |
| LINE           | L1             | L1Md_F3  | chr3  | 47105820 47112010 - | 0        | 0        | 0        |
| Simple_repeat  | Simple_repeat  | (A)n     | chr3  | 47266569 47266609 + | 0        | 0        | 0        |
| LTR            | MaLR           | MTA_Mm   | chr3  | 47453364 47453736 + | 0        | 0        | 0        |
| LTR            | MaLR           | MTA_Mm   | chr3  | 47460138 47460533 - | 0        | 0        | 0        |
| LTR            | MaLR           | MTA_Mm   | chr3  | 47601653 47602046 - | 0        | 0        | 0        |
| LTR            | MaLR           | MTA_Mm   | chr3  | 47603143 47603536 - | 0        | 0        | 0        |
| LTR            | ERV1           | RLTR24   | chr11 | 20269083 20269531 + | 0        | 0        | 0        |
| LTR            | MaLR           | MTA_Mm   | chr3  | 49129863 49130256 + | 0        | 0        | 0        |
| LTR            | MaLR           | MTA_Mm   | chr3  | 49131308 49131701 + | 0        | 0        | 0        |
| LTR            | MaLR           | MTA_Mm   | chr11 | 20321657 20322048 + | 0        | 0        | 0        |
| SINE           | Alu            | B1_Mus2  | chr11 | 20324806 20324951 + | 0        | 0        | 0        |
| SINE           | Alu            | B1_Mus1  | chr11 | 20374898 20375040 + | 0        | 0        | 0        |
| Simple_repeat  | Simple_repeat  | (A)n     | chr11 | 20375041 20375068 + | 0        | 0        | 0        |
| Simple_repeat  | Simple_repeat  | (A)n     | chr3  | 50653260 50653301 + | 0        | 0        | 0        |
| SINE           | Alu            | B1_Mus2  | chr11 | 20408776 20408922 - | 0        | 0        | 0        |
| SINE           | Alu            | B1_Mus2  | chr3  | 51928899 51929044 + | 0        | 0        | 0        |
| Simple_repeat  | Simple_repeat  | (A)n     | chr3  | 51929045 51929067 + | 0        | 0        | 0        |
| SINE           | Alu            | B1_Mus2  | chr3  | 52017487 52017634 + | 0        | 0        | 0        |
| Simple_repeat  | Simple_repeat  | (A)n     | chr3  | 52017635 52017671 + | 0        | 0        | 0        |
| SINE           | B2             | B2_Mm1a  | chr3  | 52279434 52279625 - | 0        | 0        | 0        |
| SINE           | Alu            | B1_Mm    | chr3  | 53165048 53165194 + | 0        | 0        | 0        |
| LINE           | L1             | L1Md_T   | chr3  | 53519032 53525883 - | 0        | 0        | 0        |
| Simple_repeat  | Simple_repeat  | (A)n     | chr3  | 53603103 53603140 + | 0        | 0        | 0        |
| SINE           | Alu            | B1_Mus2  | chr3  | 53619756 53619900 - | 0        | 0        | 0        |
| SINE           | Alu            | B1_Mus2  | chr3  | 53786002 53786149 + | 0        | 0        | 0        |
| Simple_repeat  | Simple_repeat  | (A)n     | chr3  | 53786150 53786172 + | 0        | 0        | 0        |
| Low_complexity | Low_complexity | A-rich   | chr3  | 53892577 53892665 + | 0        | 0        | 0        |
| Simple_repeat  | Simple_repeat  | (A)n     | chr3  | 53906636 53906685 + | 0        | 0        | 0        |
| LTR            | MaLR           | MTA_Mm   | chr3  | 54253940 54254334 + | 0        | 0        | 0        |
| Simple_repeat  | Simple_repeat  | (A)n     | chr3  | 54391179 54391213 + | 0        | 0        | 0        |
| Simple_repeat  | Simple_repeat  | (CAAAC)n | chr11 | 20837715 20837742 + | 0        | 0        | 0        |
| Simple_repeat  | Simple_repeat  | (A)n     | chr3  | 55991948 55991982 + | 0.591053 | 0        | 0.615324 |
| Simple_repeat  | Simple_repeat  | (A)n     | chr3  | 56058482 56058509 + | 0        | 0        | 0        |
| LTR            | MaLR           | MTA_Mm   | chr3  | 56129641 56130037 + | 0        | 0        | 0        |
| LINE           | L1             | L1Md_F2  | chr3  | 56352275 56357275 - | 0        | 0        | 0        |
| SINE           | Alu            | B1_Mus2  | chr3  | 57174380 57174526 + | 0        | 0        | 0        |
| Simple_repeat  | Simple_repeat  | (A)n     | chr3  | 57174527 57174569 + | 0        | 0        | 0.342623 |

|                |                |         |       |                     |          |          |          |
|----------------|----------------|---------|-------|---------------------|----------|----------|----------|
| SINE           | Alu            | B1_Mus2 | chr3  | 57381654 57381800 - | 0        | 0        | 0        |
| SINE           | Alu            | B1_Mus2 | chr3  | 57387061 57387207 + | 0        | 0        | 0        |
| Simple_repeat  | Simple_repeat  | (A)n    | chr3  | 57387208 57387231 + | 0        | 0        | 0        |
| LTR            | MaLR           | MTA_Mm  | chr10 | 4653854 4654253 +   | 0        | 0        | 0        |
| SINE           | Alu            | B1_Mm   | chr3  | 58279183 58279327 + | 0        | 0        | 0        |
| LINE           | L1             | L1Md_F2 | chr3  | 58404445 58409468 + | 0.591053 | 0.708814 | 0.615324 |
| SINE           | Alu            | B1_Mus1 | chr11 | 21128285 21128430 - | 0        | 0        | 0        |
| LTR            | MaLR           | MTA_Mm  | chr3  | 59510019 59510414 - | 0        | 0        | 0        |
| LTR            | MaLR           | MTA_Mm  | chr3  | 59511504 59511895 - | 0        | 0        | 0        |
| Simple_repeat  | Simple_repeat  | (TTTA)n | chr10 | 18507499 18507542 + | 0        | 0        | 0        |
| LTR            | MaLR           | MTA_Mm  | chr3  | 59781336 59781731 - | 0        | 0        | 0        |
| Simple_repeat  | Simple_repeat  | (A)n    | chr3  | 60541979 60542018 + | 0        | 0        | 0        |
| LTR            | MaLR           | MTA_Mm  | chr3  | 61042411 61042805 - | 0        | 0        | 0        |
| LTR            | MaLR           | MTA_Mm  | chr3  | 61043900 61044294 - | 0        | 0        | 0        |
| Simple_repeat  | Simple_repeat  | (A)n    | chr3  | 61223706 61223748 + | 0.591053 | 0        | 0        |
| Simple_repeat  | Simple_repeat  | (A)n    | chr3  | 61472475 61472509 + | 0        | 0        | 0        |
| LTR            | MaLR           | MTA_Mm  | chr3  | 62439590 62439985 + | 0        | 0        | 0.342623 |
| SINE           | Alu            | B1_Mus2 | chr3  | 62725129 62725271 - | 0        | 0        | 0        |
| SINE           | Alu            | B1_Mus2 | chr3  | 62911832 62911978 - | 0        | 0        | 0        |
| Simple_repeat  | Simple_repeat  | (A)n    | chr3  | 63666743 63666769 + | 0        | 0        | 0        |
| Simple_repeat  | Simple_repeat  | (A)n    | chr3  | 64292471 64292553 + | 0        | 0        | 0        |
| Simple_repeat  | Simple_repeat  | (A)n    | chr3  | 64370740 64370783 + | 0.332194 | 0        | 0        |
| Simple_repeat  | Simple_repeat  | (A)n    | chr3  | 65385408 65385444 + | 0        | 0        | 0        |
| SINE           | Alu            | B1_Mur3 | chr3  | 65822832 65822982 + | 0        | 0        | 0        |
| Simple_repeat  | Simple_repeat  | (A)n    | chr3  | 65822983 65823006 + | 0        | 0        | 0        |
| Simple_repeat  | Simple_repeat  | (A)n    | chr3  | 66406979 66407005 + | 0        | 0        | 0        |
| SINE           | Alu            | B1_Mus2 | chr3  | 67673916 67674063 - | 0        | 0        | 0        |
| SINE           | Alu            | B1_Mm   | chr3  | 68517389 68517505 + | 0        | 0        | 0        |
| Simple_repeat  | Simple_repeat  | (A)n    | chr3  | 68517506 68517531 + | 0        | 0        | 0        |
| SINE           | Alu            | B1_Mus2 | chr3  | 68603190 68603335 + | 0        | 0        | 0        |
| Simple_repeat  | Simple_repeat  | (A)n    | chr3  | 68603336 68603362 + | 0        | 0        | 0        |
| LTR            | MaLR           | MTA_Mm  | chr3  | 68636270 68636665 + | 0        | 0        | 0        |
| SINE           | Alu            | B1_Mur3 | chr3  | 68668723 68668863 - | 1.85701  | 0        | 0        |
| Simple_repeat  | Simple_repeat  | (A)n    | chr3  | 68864467 68864493 + | 0        | 0        | 0        |
| Low_complexity | Low_complexity | A-rich  | chr3  | 69598593 69598712 + | 0        | 0        | 0        |
| LTR            | MaLR           | MTA_Mm  | chr3  | 69804905 69805299 + | 0        | 0        | 0.957947 |
| LTR            | MaLR           | MTA_Mm  | chr11 | 22205745 22206141 + | 0        | 0        | 0        |
| LTR            | MaLR           | MTA_Mm  | chr3  | 70250824 70251217 - | 0        | 0        | 0        |
| LTR            | MaLR           | MTA_Mm  | chr3  | 70518923 70519314 - | 0        | 0        | 0        |
| SINE           | Alu            | B1_Mus2 | chr3  | 70697709 70697855 - | 0        | 0        | 0        |
| LTR            | MaLR           | MTA_Mm  | chr11 | 22339591 22339985 - | 0        | 0        | 0        |
| Simple_repeat  | Simple_repeat  | (A)n    | chr3  | 71437018 71437057 + | 0        | 0        | 0        |
| Simple_repeat  | Simple_repeat  | (A)n    | chr3  | 71462058 71462086 + | 0        | 0        | 0        |
| LINE           | L1             | L1Md_F2 | chr3  | 71481041 71486238 + | 0        | 0        | 0        |
| LINE           | L1             | L1Md_F  | chr3  | 71547793 71553709 - | 0        | 0        | 0        |
| SINE           | Alu            | B1_Mus1 | chr3  | 72260310 72260457 + | 0        | 0        | 0        |
| Simple_repeat  | Simple_repeat  | (A)n    | chr3  | 72260458 72260487 + | 0        | 0        | 0        |
| SINE           | Alu            | B1_Mus1 | chr3  | 72309699 72309858 + | 0        | 0        | 0        |
| Simple_repeat  | Simple_repeat  | (A)n    | chr3  | 72309859 72309966 + | 0        | 0        | 0        |
| SINE           | Alu            | B1_Mm   | chr3  | 72344232 72344381 - | 0        | 0        | 0        |
| SINE           | Alu            | B1_Mm   | chr11 | 22423833 22423979 - | 0        | 0        | 0        |
| Simple_repeat  | Simple_repeat  | (A)n    | chr3  | 72636435 72636463 + | 0        | 0        | 0        |
| SINE           | Alu            | B1_Mm   | chr11 | 22493129 22493275 + | 0        | 0        | 0        |
| Simple_repeat  | Simple_repeat  | (A)n    | chr11 | 22509075 22509113 + | 0        | 0        | 0        |
| SINE           | Alu            | B1_Mur1 | chr11 | 22572779 22572916 + | 0        | 0        | 0        |
| Simple_repeat  | Simple_repeat  | (A)n    | chr11 | 22572917 22572950 + | 0        | 0        | 0        |
| SINE           | Alu            | B1_Mus2 | chr3  | 74512229 74512368 + | 0        | 0        | 0        |
| Simple_repeat  | Simple_repeat  | (A)n    | chr3  | 74512369 74512409 + | 0        | 0        | 0        |
| LTR            | MaLR           | MTA_Mm  | chr11 | 22600151 22600545 - | 0        | 0        | 0        |
| Simple_repeat  | Simple_repeat  | (A)n    | chr3  | 74786161 74786211 + | 0        | 0.708814 | 0        |
| Simple_repeat  | Simple_repeat  | (A)n    | chr3  | 75042640 75042696 + | 0        | 0        | 0        |
| SINE           | Alu            | B1_Mus2 | chr3  | 75296636 75296781 - | 0        | 0        | 0        |
| Simple_repeat  | Simple_repeat  | (A)n    | chr3  | 76740180 76740228 + | 0        | 0        | 0        |
| Simple_repeat  | Simple_repeat  | (A)n    | chr3  | 76983842 76983885 + | 0        | 0        | 0        |
| LINE           | L1             | L1Md_T  | chr3  | 76987954 76994367 - | 0        | 0        | 0        |
| Simple_repeat  | Simple_repeat  | (A)n    | chr3  | 77031435 77031477 + | 0        | 0        | 0        |
| Simple_repeat  | Simple_repeat  | (A)n    | chr3  | 77079903 77079933 + | 0        | 0        | 0        |

|               |               |         |       |                     |          |          |          |
|---------------|---------------|---------|-------|---------------------|----------|----------|----------|
| LTR           | MaLR          | MTA_Mm  | chr3  | 77355528 77355926 + | 0        | 0        | 0        |
| LTR           | MaLR          | MTA_Mm  | chr3  | 77773004 77773399 + | 0        | 0        | 0        |
| LTR           | MaLR          | MTA_Mm  | chr3  | 77924322 77924717 - | 0        | 0        | 0        |
| Simple_repeat | Simple_repeat | (A)n    | chr3  | 78066947 78066982 + | 0        | 0        | 0        |
| Simple_repeat | Simple_repeat | (A)n    | chr3  | 78312684 78312723 + | 0        | 0        | 0        |
| LINE          | L1            | L1Md_F3 | chr3  | 78370846 78376348 + | 0        | 0        | 0        |
| Simple_repeat | Simple_repeat | (A)n    | chr3  | 78425518 78425546 + | 0        | 0        | 0        |
| SINE          | Alu           | B1_Mus1 | chr3  | 78573176 78573323 - | 0        | 0        | 0.342623 |
| LTR           | MaLR          | MTA_Mm  | chr3  | 78955450 78955845 + | 0        | 0        | 0        |
| SINE          | Alu           | B1_Mus1 | chr3  | 79759513 79759660 + | 0.591053 | 0        | 0        |
| Simple_repeat | Simple_repeat | (A)n    | chr3  | 79759661 79759686 + | 0.591053 | 0        | 0        |
| LTR           | MaLR          | ORR1B2  | chr3  | 79930865 79931157 - | 0        | 0        | 0        |
| LINE          | L1            | L1Md_F2 | chr3  | 79947917 79954042 - | 0        | 0        | 0        |
| LTR           | MaLR          | MTA_Mm  | chr3  | 80238168 80238563 - | 0        | 0        | 0        |
| LTR           | MaLR          | MTA_Mm  | chr3  | 80325463 80325857 - | 0        | 0        | 0        |
| LTR           | MaLR          | MTA_Mm  | chr3  | 80326953 80327347 - | 0        | 0        | 0.342623 |
| Simple_repeat | Simple_repeat | (A)n    | chr3  | 80741004 80741047 + | 0        | 0        | 0        |
| Simple_repeat | Simple_repeat | (A)n    | chr3  | 81050701 81050731 + | 0.332194 | 0        | 0        |
| LINE          | L1            | L1_Mus4 | chr3  | 81315832 81321762 - | 0        | 0        | 0        |
| Simple_repeat | Simple_repeat | (A)n    | chr3  | 82298085 82298118 + | 0        | 0        | 0        |
| LTR           | MaLR          | MTA_Mm  | chr3  | 82568375 82568768 + | 0        | 0        | 0        |
| SINE          | Alu           | B1_Mm   | chr3  | 83020239 83020384 + | 0        | 0        | 0        |
| Simple_repeat | Simple_repeat | (A)n    | chr3  | 83020385 83020408 + | 0.591053 | 0        | 0        |
| Simple_repeat | Simple_repeat | (A)n    | chr3  | 83206164 83206234 + | 0        | 0        | 0.342623 |
| SINE          | Alu           | B1_Mus2 | chr3  | 84451988 84452133 + | 0        | 0        | 0        |
| Simple_repeat | Simple_repeat | (A)n    | chr3  | 84452134 84452161 + | 0        | 0        | 0        |
| Simple_repeat | Simple_repeat | (A)n    | chr3  | 84589292 84589325 + | 0        | 0        | 0        |
| Simple_repeat | Simple_repeat | (A)n    | chr3  | 85312988 85313026 + | 0        | 0        | 0        |
| SINE          | B4            | B4A     | chr3  | 85359870 85360177 - | 3.15698  | 0        | 0        |
| Simple_repeat | Simple_repeat | (A)n    | chr3  | 85582048 85582101 + | 0        | 0        | 0        |
| SINE          | Alu           | B1_Mm   | chr3  | 85745970 85746116 - | 0        | 0        | 0        |
| SINE          | Alu           | B1_Mus1 | chr3  | 85790414 85790561 + | 1.77316  | 0        | 0        |
| Simple_repeat | Simple_repeat | (A)n    | chr3  | 85790562 85790586 + | 1.77316  | 0        | 0        |
| SINE          | Alu           | B1_Mus2 | chr3  | 85967221 85967357 - | 0        | 0        | 0        |
| SINE          | Alu           | B1_Mus2 | chr3  | 86799109 86799255 + | 0        | 0        | 0        |
| Simple_repeat | Simple_repeat | (A)n    | chr3  | 86799256 86799284 + | 0        | 0        | 0        |
| SINE          | Alu           | B1_Mur4 | chr3  | 87690071 87690217 + | 0        | 0.380568 | 0.342623 |
| Simple_repeat | Simple_repeat | (A)n    | chr3  | 87690218 87690247 + | 0        | 0.380568 | 0.342623 |
| SINE          | B2            | B2_Mm1a | chr3  | 87761374 87761561 + | 0        | 0        | 0        |
| SINE          | Alu           | B1_Mm   | chr3  | 87818182 87818328 - | 0        | 0        | 0        |
| SINE          | B2            | B2_Mm1a | chr11 | 23402039 23402232 + | 0        | 0        | 0        |
| Simple_repeat | Simple_repeat | (A)n    | chr11 | 23402233 23402262 + | 0        | 0        | 0.342623 |
| SINE          | Alu           | B1_Mus2 | chr11 | 23407488 23407634 + | 0        | 0        | 0        |
| Simple_repeat | Simple_repeat | (A)n    | chr11 | 23407635 23407662 + | 0        | 0        | 0        |
| LTR           | MaLR          | MTA_Mm  | chr3  | 88071665 88072046 - | 0        | 0        | 0        |
| SINE          | Alu           | B1_Mm   | chr11 | 23416000 23416145 - | 0        | 0        | 0        |
| SINE          | Alu           | B1_Mus1 | chr3  | 88282921 88283065 - | 0        | 0        | 0        |
| SINE          | Alu           | B1_Mm   | chr3  | 88378663 88378809 - | 0        | 0        | 0        |
| Simple_repeat | Simple_repeat | (TTTA)n | chr3  | 88414309 88414339 + | 0        | 0        | 0        |
| SINE          | Alu           | B1_Mus2 | chr3  | 88760857 88760989 - | 0        | 0        | 0        |
| SINE          | Alu           | B1_Mus1 | chr3  | 88886516 88886660 - | 0        | 0        | 0        |
| Simple_repeat | Simple_repeat | (A)n    | chr3  | 88916988 88917017 + | 0        | 0        | 0        |
| SINE          | Alu           | B1_Mus2 | chr3  | 89004305 89004451 - | 0        | 0        | 0        |
| SINE          | B2            | B2_Mm1a | chr3  | 89259677 89259834 - | 0        | 0        | 0        |
| SINE          | Alu           | B1_Mus2 | chr3  | 89290497 89290613 - | 0        | 0        | 0        |
| SINE          | Alu           | B1_Mus1 | chr3  | 89496393 89496533 + | 0        | 0        | 0        |
| Simple_repeat | Simple_repeat | (A)n    | chr3  | 89496534 89496555 + | 0        | 0        | 0        |
| SINE          | Alu           | B1_Mm   | chr3  | 89787240 89787386 + | 0        | 0        | 0        |
| Simple_repeat | Simple_repeat | (A)n    | chr3  | 89787387 89787437 + | 0        | 0        | 0.342623 |
| SINE          | Alu           | B1_Mm   | chr3  | 90023725 90023878 - | 0        | 0        | 0        |
| SINE          | Alu           | B1_Mus2 | chr3  | 90087665 90087810 + | 0        | 0        | 0        |
| SINE          | Alu           | B1_Mm   | chr3  | 90091530 90091679 - | 0        | 0        | 0        |
| SINE          | Alu           | B1_Mus2 | chr3  | 90093301 90093446 + | 0        | 0        | 0        |
| Simple_repeat | Simple_repeat | (A)n    | chr3  | 90093447 90093479 + | 0        | 0        | 0        |
| SINE          | Alu           | B1_Mus1 | chr3  | 90251584 90251730 + | 0        | 0        | 0        |
| Simple_repeat | Simple_repeat | (A)n    | chr3  | 90251731 90251759 + | 0        | 0        | 0        |
| SINE          | Alu           | B1_Mus2 | chr3  | 90274991 90275137 + | 0        | 0        | 0        |

|               |               |         |       |                     |          |          |          |
|---------------|---------------|---------|-------|---------------------|----------|----------|----------|
| Simple_repeat | Simple_repeat | (A)n    | chr3  | 90275138 90275169 + | 0        | 0        | 0        |
| SINE          | Alu           | B1_Mus2 | chr3  | 90279296 90279448 + | 0        | 0        | 0        |
| LTR           | MaLR          | MTA_Mm  | chr11 | 23689081 23689480 + | 0        | 0        | 0        |
| Simple_repeat | Simple_repeat | (A)n    | chr3  | 90663576 90663611 + | 0        | 0        | 0        |
| LINE          | L1            | L1Md_F3 | chr3  | 90971295 90975562 + | 0        | 0        | 0.342623 |
| SINE          | Alu           | B1_Mm   | chr11 | 23719512 23719657 - | 0        | 0        | 0        |
| LINE          | L1            | L1_Mus2 | chr3  | 91279558 91285114 - | 0        | 0        | 0        |
| LINE          | L1            | L1Md_F2 | chr3  | 91459705 91465170 + | 0        | 0        | 0        |
| LINE          | L1            | L1Md_F2 | chr3  | 91559343 91564778 + | 0        | 0        | 0        |
| LINE          | L1            | L1_Mus1 | chr3  | 91721211 91726913 - | 0        | 0        | 0        |
| Simple_repeat | Simple_repeat | (A)n    | chr3  | 91808850 91808874 + | 0        | 0        | 0        |
| Simple_repeat | Simple_repeat | (A)n    | chr3  | 91818084 91818124 + | 0        | 0        | 0        |
| Simple_repeat | Simple_repeat | (A)n    | chr3  | 92374727 92374763 + | 0        | 0        | 0        |
| LTR           | MaLR          | MTA_Mm  | chr3  | 92602954 92603348 - | 0        | 0        | 0        |
| LTR           | MaLR          | MTA_Mm  | chr3  | 93104132 93104526 + | 0        | 0        | 0        |
| SINE          | Alu           | B1_Mm   | chr3  | 93253193 93253338 + | 0        | 0        | 0        |
| Simple_repeat | Simple_repeat | (A)n    | chr3  | 93253339 93253362 + | 0        | 0        | 0        |
| Simple_repeat | Simple_repeat | (A)n    | chr11 | 23906926 23906967 + | 0        | 0        | 0        |
| SINE          | Alu           | B1_Mus2 | chr3  | 93287123 93287268 - | 0        | 0        | 0        |
| SINE          | Alu           | B1_Mus1 | chr3  | 94086204 94086321 - | 0        | 0        | 0        |
| SINE          | Alu           | B1_Mus2 | chr3  | 94395714 94395860 - | 0        | 0        | 0        |
| SINE          | Alu           | B1_Mus1 | chr3  | 94412768 94412900 - | 0        | 0        | 0        |
| SINE          | Alu           | B1_Mus1 | chr3  | 94526435 94526581 + | 0        | 0        | 0        |
| Simple_repeat | Simple_repeat | (A)n    | chr3  | 94526582 94526606 + | 0        | 0        | 0        |
| LTR           | MaLR          | MTA_Mm  | chr3  | 94861273 94861668 + | 0        | 0        | 0        |
| SINE          | Alu           | B1_Mus1 | chr3  | 95112253 95112400 - | 0        | 0        | 0        |
| SINE          | Alu           | B1_Mm   | chr3  | 95230785 95230932 - | 0        | 0        | 0        |
| SINE          | Alu           | B1_Mur2 | chr3  | 95315534 95315673 + | 0        | 0.380568 | 0        |
| Simple_repeat | Simple_repeat | (A)n    | chr3  | 95315674 95315699 + | 0        | 0.380568 | 0        |
| SINE          | Alu           | B1_Mus1 | chr3  | 95524682 95524830 - | 0        | 0        | 0        |
| SINE          | Alu           | B1_Mus1 | chr3  | 95630185 95630328 + | 0        | 0        | 0        |
| Simple_repeat | Simple_repeat | (A)n    | chr3  | 95630329 95630367 + | 0        | 0        | 0        |
| SINE          | Alu           | B1_Mus1 | chr3  | 95764019 95764156 + | 0        | 0        | 0        |
| Simple_repeat | Simple_repeat | (A)n    | chr3  | 95764157 95764196 + | 0        | 0        | 0        |
| Simple_repeat | Simple_repeat | (TTTA)n | chr3  | 96021706 96021757 + | 0        | 0        | 0        |
| SINE          | Alu           | B1_Mm   | chr3  | 96356292 96356438 + | 0        | 0        | 0        |
| Simple_repeat | Simple_repeat | (A)n    | chr3  | 96356439 96356473 + | 0        | 0        | 0        |
| SINE          | B2            | B2_Mm1t | chr3  | 96889878 96890071 + | 0        | 0        | 0        |
| SINE          | Alu           | B1_Mus2 | chr3  | 96926642 96926788 + | 0        | 0        | 0        |
| SINE          | Alu           | B1_Mm   | chr3  | 96943885 96944030 + | 0        | 0        | 0        |
| Simple_repeat | Simple_repeat | (A)n    | chr3  | 96944031 96944080 + | 0        | 0        | 0        |
| Simple_repeat | Simple_repeat | (A)n    | chr3  | 97046455 97046483 + | 0        | 0        | 0        |
| SINE          | Alu           | B1_Mus2 | chr3  | 97163963 97164108 - | 0        | 0        | 0        |
| SINE          | Alu           | B1_Mm   | chr3  | 97421293 97421407 - | 0        | 0        | 0        |
| LINE          | L1            | L1Md_T  | chr11 | 24775660 24782253 - | 0        | 0        | 0        |
| SINE          | Alu           | B1_Mm   | chr3  | 97997970 97998115 - | 0        | 0        | 0        |
| SINE          | Alu           | B1_Mm   | chr3  | 98146680 98146826 + | 0        | 0        | 0        |
| Simple_repeat | Simple_repeat | (A)n    | chr3  | 98146827 98146854 + | 0        | 0        | 0        |
| SINE          | Alu           | B1_Mus2 | chr3  | 98163720 98163866 + | 0        | 0        | 0        |
| Simple_repeat | Simple_repeat | (A)n    | chr3  | 98163867 98163888 + | 0        | 0        | 0        |
| Simple_repeat | Simple_repeat | (A)n    | chr11 | 24851086 24851114 + | 0        | 0.380568 | 0        |
| Simple_repeat | Simple_repeat | (A)n    | chr3  | 99043110 99043136 + | 0        | 0        | 0        |
| LINE          | L1            | L1Md_F  | chr3  | 99170363 99175652 + | 0        | 0        | 0        |
| LINE          | L1            | L1Md_F2 | chr3  | 99410060 99416420 - | 0        | 0        | 0        |
| SINE          | Alu           | PB1D9   | chr3  | 10051845 10051857 + | 0        | 0        | 0        |
| Simple_repeat | Simple_repeat | (A)n    | chr3  | 10051857 10051861 + | 0        | 0        | 0        |
| LTR           | MaLR          | MTA_Mm  | chr3  | 10056637 10056676 + | 0        | 0        | 0        |
| LTR           | MaLR          | MTA_Mm  | chr3  | 10084335 10084372 - | 0        | 0        | 0        |
| SINE          | Alu           | B1_Mm   | chr3  | 10183070 10183085 + | 0        | 0        | 0        |
| Simple_repeat | Simple_repeat | (A)n    | chr3  | 10183085 10183091 + | 0        | 0        | 0        |
| SINE          | Alu           | B1_Mus2 | chr3  | 10188406 10188421 - | 0        | 0        | 0        |
| Simple_repeat | Simple_repeat | (A)n    | chr3  | 10305795 10305798 + | 0        | 0        | 0        |
| LTR           | MaLR          | MTA_Mm  | chr3  | 10349632 10349672 - | 0        | 0        | 0        |
| SINE          | Alu           | B1_Mm   | chr3  | 10350811 10350825 + | 0        | 0        | 0        |
| Simple_repeat | Simple_repeat | (A)n    | chr3  | 10350826 10350829 + | 0        | 0        | 0        |
| Simple_repeat | Simple_repeat | (A)n    | chr3  | 10381285 10381287 + | 0.332194 | 0        | 0        |
| Simple_repeat | Simple_repeat | (A)n    | chr3  | 10414024 10414027 + | 0        | 0.380568 | 0        |



|               |               |          |       |          |            |          |   |          |
|---------------|---------------|----------|-------|----------|------------|----------|---|----------|
| SINE          | Alu           | B1_Mus2  | chr3  | 10434372 | 10434387 - | 0.332194 | 0 | 0        |
| SINE          | Alu           | B1_Mus2  | chr3  | 10446882 | 10446897 - | 0        | 0 | 0        |
| SINE          | Alu           | PB1D7    | chr3  | 10489134 | 10489144 + | 0        | 0 | 0        |
| Simple_repeat | Simple_repeat | (A)n     | chr3  | 10489144 | 10489147 + | 0        | 0 | 0        |
| LTR           | MaLR          | MTA_Mm   | chr3  | 10498754 | 10498794 - | 0        | 0 | 0        |
| SINE          | Alu           | B1_Mur4  | chr3  | 10549318 | 10549333 + | 0        | 0 | 0        |
| SINE          | Alu           | B1_Mus2  | chr3  | 10563959 | 10563973 - | 0        | 0 | 0.342623 |
| Simple_repeat | Simple_repeat | (A)n     | chr3  | 10565222 | 10565225 + | 0        | 0 | 0        |
| Simple_repeat | Simple_repeat | (A)n     | chr3  | 10573919 | 10573923 + | 0        | 0 | 0        |
| LTR           | MaLR          | MTA_Mm   | chr3  | 10646522 | 10646561 - | 0        | 0 | 0        |
| LTR           | MaLR          | MTA_Mm   | chr3  | 10646667 | 10646706 - | 0        | 0 | 0        |
| SINE          | Alu           | B1_Mus1  | chr3  | 10714247 | 10714262 - | 0.332194 | 0 | 0        |
| LTR           | MaLR          | MTA_Mm   | chr11 | 26141137 | 26141531 - | 0        | 0 | 0        |
| SINE          | Alu           | B1_Mm    | chr3  | 10771508 | 10771520 - | 0        | 0 | 0        |
| Simple_repeat | Simple_repeat | (TTTA)n  | chr3  | 10781115 | 10781119 + | 0        | 0 | 0        |
| SINE          | Alu           | B1_Mus2  | chr3  | 10804344 | 10804359 + | 0        | 0 | 0        |
| Simple_repeat | Simple_repeat | (A)n     | chr3  | 10804359 | 10804362 + | 0        | 0 | 0        |
| SINE          | Alu           | B1_Mus1  | chr3  | 10819293 | 10819307 + | 0        | 0 | 0        |
| Simple_repeat | Simple_repeat | (A)n     | chr3  | 10819307 | 10819315 + | 0        | 0 | 0        |
| LTR           | MaLR          | MTA_Mm   | chr3  | 11026376 | 11026415 + | 0        | 0 | 0        |
| LINE          | L1            | L1Md_F2  | chr3  | 11063086 | 11063701 - | 0        | 0 | 0        |
| SINE          | Alu           | B1_Mus1  | chr3  | 11080280 | 11080294 + | 0        | 0 | 0        |
| Simple_repeat | Simple_repeat | (A)n     | chr3  | 11080295 | 11080297 + | 0        | 0 | 0        |
| SINE          | Alu           | B1_Mm    | chr3  | 11089918 | 11089933 + | 0        | 0 | 0        |
| Simple_repeat | Simple_repeat | (A)n     | chr3  | 11089933 | 11089936 + | 0        | 0 | 0        |
| LTR           | MaLR          | MTA_Mm   | chr3  | 11091517 | 11091557 + | 0        | 0 | 0        |
| LTR           | MaLR          | MTA_Mm   | chr3  | 11091663 | 11091702 + | 0        | 0 | 0        |
| LTR           | MaLR          | MTA_Mm   | chr11 | 26562613 | 26562945 - | 0        | 0 | 0        |
| Simple_repeat | Simple_repeat | (A)n     | chr3  | 11138073 | 11138078 + | 0        | 0 | 0        |
| LTR           | MaLR          | MTA_Mm   | chr3  | 11194867 | 11194906 + | 0        | 0 | 0        |
| SINE          | Alu           | B1_Mm    | chr11 | 26677502 | 26677648 - | 0        | 0 | 0        |
| LTR           | MaLR          | MTA_Mm   | chr3  | 11227044 | 11227083 + | 0        | 0 | 0        |
| LINE          | L1            | L1_Mus2  | chr3  | 11233136 | 11233587 - | 0        | 0 | 0        |
| LINE          | L1            | L1Md_F2  | chr3  | 11233620 | 11234156 + | 0        | 0 | 0        |
| LINE          | L1            | Lx2      | chr3  | 11280539 | 11281039 + | 0        | 0 | 0        |
| LTR           | MaLR          | MTA_Mm   | chr3  | 11283115 | 11283154 - | 0        | 0 | 0        |
| SINE          | Alu           | B1_Mus2  | chr11 | 26755993 | 26756139 + | 0        | 0 | 0        |
| Simple_repeat | Simple_repeat | (A)n     | chr11 | 26756140 | 26756176 + | 0        | 0 | 0        |
| LTR           | MaLR          | MTA_Mm   | chr3  | 11407001 | 11407041 - | 0        | 0 | 0.615324 |
| Simple_repeat | Simple_repeat | (GAAA)n  | chr3  | 11422482 | 11422492 + | 0        | 0 | 0        |
| LTR           | MaLR          | MTA_Mm   | chr3  | 11496681 | 11496720 + | 0        | 0 | 0.342623 |
| LINE          | L1            | L1Md_T   | chr3  | 11512345 | 11512881 + | 0        | 0 | 0        |
| Simple_repeat | Simple_repeat | (A)n     | chr3  | 11520039 | 11520043 + | 0        | 0 | 0        |
| Simple_repeat | Simple_repeat | (A)n     | chr3  | 11525787 | 11525791 + | 0        | 0 | 0        |
| SINE          | Alu           | B1_Mus1  | chr3  | 11555645 | 11555659 - | 0        | 0 | 0        |
| SINE          | Alu           | B1_Mus2  | chr3  | 11576718 | 11576733 + | 0        | 0 | 0        |
| Simple_repeat | Simple_repeat | (A)n     | chr3  | 11576733 | 11576736 + | 0        | 0 | 0        |
| LTR           | MaLR          | MTA_Mm   | chr3  | 11576899 | 11576939 + | 0        | 0 | 0        |
| Simple_repeat | Simple_repeat | (A)n     | chr11 | 27088440 | 27088482 + | 0        | 0 | 0        |
| LTR           | MaLR          | MTA_Mm   | chr3  | 11583851 | 11583891 + | 0        | 0 | 0.342623 |
| Simple_repeat | Simple_repeat | (A)n     | chr3  | 11596080 | 11596083 + | 0        | 0 | 0        |
| LINE          | L1            | L1Md_T   | chr11 | 27282597 | 27289454 - | 0        | 0 | 0        |
| Simple_repeat | Simple_repeat | (A)n     | chr3  | 11782868 | 11782872 + | 0        | 0 | 0        |
| Simple_repeat | Simple_repeat | (A)n     | chr3  | 11783752 | 11783756 + | 0        | 0 | 0        |
| Simple_repeat | Simple_repeat | (A)n     | chr3  | 11788897 | 11788902 + | 0        | 0 | 0        |
| SINE          | Alu           | B1_Mur4  | chr3  | 11918661 | 11918673 - | 0.591053 | 0 | 0        |
| Simple_repeat | Simple_repeat | (A)n     | chr3  | 11920994 | 11920997 + | 0        | 0 | 0        |
| Simple_repeat | Simple_repeat | (A)n     | chr3  | 11938772 | 11938776 + | 0        | 0 | 0        |
| Simple_repeat | Simple_repeat | (A)n     | chr3  | 11988289 | 11988292 + | 0        | 0 | 0        |
| LTR           | MaLR          | MTA_Mm   | chr3  | 12003681 | 12003721 + | 0        | 0 | 0        |
| Simple_repeat | Simple_repeat | (A)n     | chr3  | 12027021 | 12027024 + | 0        | 0 | 0        |
| Simple_repeat | Simple_repeat | (A)n     | chr3  | 12049579 | 12049582 + | 0        | 0 | 0        |
| Simple_repeat | Simple_repeat | (A)n     | chr3  | 12053758 | 12053762 + | 0        | 0 | 0        |
| Simple_repeat | Simple_repeat | (GAAAA)n | chr3  | 12059692 | 12059700 + | 0        | 0 | 0        |
| Simple_repeat | Simple_repeat | (A)n     | chr3  | 12065403 | 12065406 + | 0        | 0 | 0        |
| LTR           | MaLR          | MTA_Mm   | chr3  | 12089977 | 12090016 - | 0        | 0 | 0        |
| SINE          | B2            | B2_Mm1a  | chr3  | 12126736 | 12126756 + | 0        | 0 | 0        |

|                |                |         |       |          |          |   |          |          |          |
|----------------|----------------|---------|-------|----------|----------|---|----------|----------|----------|
| LTR            | MaLR           | MTB     | chr10 | 4726252  | 4726647  | - | 0        | 0        | 0        |
| Simple_repeat  | Simple_repeat  | (A)n    | chr3  | 12197672 | 12197675 | + | 0        | 0        | 0.342623 |
| SINE           | Alu            | B1_Mus1 | chr3  | 12239103 | 12239117 | - | 0        | 0        | 0        |
| SINE           | B2             | B2_Mm1t | chr3  | 12263111 | 12263129 | - | 0        | 0        | 0        |
| SINE           | Alu            | B1_Mus1 | chr3  | 12269834 | 12269849 | - | 0        | 0        | 0        |
| Simple_repeat  | Simple_repeat  | (GAAA)n | chr11 | 27956130 | 27956231 | + | 0        | 0        | 0        |
| LTR            | MaLR           | MTA_Mm  | chr3  | 12387264 | 12387304 | + | 0        | 0        | 0        |
| SINE           | Alu            | B1_Mus1 | chr3  | 12415655 | 12415671 | + | 0        | 0        | 0        |
| Simple_repeat  | Simple_repeat  | (A)n    | chr3  | 12415671 | 12415673 | + | 0        | 0        | 0        |
| SINE           | Alu            | B1_Mus2 | chr3  | 12419654 | 12419669 | - | 0        | 0.380568 | 0        |
| Simple_repeat  | Simple_repeat  | (GAAA)n | chr3  | 12500902 | 12500911 | + | 0        | 0        | 0        |
| LINE           | L1             | L1Md_F2 | chr3  | 12507730 | 12508327 | - | 0        | 0        | 0        |
| SINE           | Alu            | B1_Mus1 | chr3  | 12554561 | 12554575 | + | 0        | 0        | 0        |
| Simple_repeat  | Simple_repeat  | (A)n    | chr3  | 12554575 | 12554578 | + | 0.332194 | 0        | 0        |
| LTR            | MaLR           | MTA_Mm  | chr3  | 12582853 | 12582891 | - | 0        | 0        | 0        |
| SINE           | Alu            | B1_Mus2 | chr3  | 12660619 | 12660633 | + | 0        | 0        | 0        |
| Simple_repeat  | Simple_repeat  | (A)n    | chr3  | 12660633 | 12660636 | + | 0        | 0        | 0        |
| Simple_repeat  | Simple_repeat  | (A)n    | chr3  | 12684337 | 12684341 | + | 0        | 0        | 0        |
| SINE           | Alu            | B1_Mm   | chr3  | 12691754 | 12691769 | + | 0        | 0        | 0        |
| Simple_repeat  | Simple_repeat  | (A)n    | chr3  | 12691769 | 12691771 | + | 0        | 0        | 0        |
| SINE           | Alu            | B1_Mm   | chr3  | 12692420 | 12692434 | - | 2.89812  | 1.85052  | 5.26521  |
| Simple_repeat  | Simple_repeat  | (A)n    | chr3  | 12692824 | 12692828 | + | 0.591053 | 0        | 0        |
| Simple_repeat  | Simple_repeat  | (A)n    | chr3  | 12696025 | 12696028 | + | 0        | 0        | 0        |
| SINE           | B2             | B2_Mm1a | chr3  | 12714560 | 12714579 | + | 0        | 0        | 0        |
| SINE           | Alu            | B1_Mm   | chr3  | 12722940 | 12722954 | - | 0        | 0        | 0        |
| Simple_repeat  | Simple_repeat  | (A)n    | chr3  | 12796103 | 12796105 | + | 0        | 0        | 0        |
| Simple_repeat  | Simple_repeat  | (A)n    | chr3  | 12813499 | 12813504 | + | 0        | 0        | 0        |
| Simple_repeat  | Simple_repeat  | (A)n    | chr11 | 28610173 | 28610202 | + | 0        | 0        | 0        |
| SINE           | Alu            | B1_Mus1 | chr3  | 12827113 | 12827127 | - | 0        | 0        | 0        |
| SINE           | Alu            | B1_Mm   | chr3  | 12830543 | 12830557 | - | 0        | 0        | 0        |
| SINE           | Alu            | B1_Mus2 | chr3  | 12833169 | 12833184 | + | 0        | 0        | 0        |
| Simple_repeat  | Simple_repeat  | (A)n    | chr3  | 12833184 | 12833188 | + | 0.591053 | 0        | 0        |
| Simple_repeat  | Simple_repeat  | (A)n    | chr3  | 12844478 | 12844482 | + | 0        | 0        | 0        |
| SINE           | Alu            | B1_Mus2 | chr3  | 12868165 | 12868180 | - | 0        | 0        | 0        |
| SINE           | Alu            | B1_Mus2 | chr3  | 12871180 | 12871194 | + | 0        | 0        | 0        |
| Simple_repeat  | Simple_repeat  | (A)n    | chr3  | 12871195 | 12871200 | + | 0        | 0        | 0        |
| SINE           | Alu            | B1_Mm   | chr3  | 12912458 | 12912472 | - | 0        | 0        | 0        |
| Simple_repeat  | Simple_repeat  | (A)n    | chr10 | 19229015 | 19229043 | + | 0        | 0        | 0        |
| LTR            | MaLR           | MTB     | chr3  | 12947980 | 12948019 | - | 0        | 0        | 0        |
| Simple_repeat  | Simple_repeat  | (A)n    | chr11 | 28856085 | 28856119 | + | 0        | 0        | 0        |
| SINE           | Alu            | B1_Mus1 | chr3  | 13043430 | 13043445 | + | 0.591053 | 0        | 0        |
| Simple_repeat  | Simple_repeat  | (A)n    | chr3  | 13043445 | 13043450 | + | 0.591053 | 0        | 0        |
| SINE           | Alu            | B1_Mus2 | chr3  | 13043610 | 13043624 | + | 0        | 0        | 0        |
| Simple_repeat  | Simple_repeat  | (A)n    | chr3  | 13043625 | 13043627 | + | 0        | 0        | 0        |
| Simple_repeat  | Simple_repeat  | (A)n    | chr3  | 13051636 | 13051644 | + | 0        | 0        | 0        |
| SINE           | Alu            | B1_Mus1 | chr3  | 13061362 | 13061378 | - | 0        | 0        | 0        |
| Simple_repeat  | Simple_repeat  | (A)n    | chr3  | 13065879 | 13065884 | + | 0        | 0        | 0.342623 |
| LINE           | L1             | L1Md_T  | chr3  | 13136962 | 13137490 | + | 0        | 0        | 0        |
| SINE           | Alu            | B1_Mm   | chr3  | 13169254 | 13169268 | - | 0        | 0        | 0        |
| Simple_repeat  | Simple_repeat  | (A)n    | chr3  | 13193610 | 13193613 | + | 0        | 0        | 0        |
| SINE           | Alu            | B1_Mus1 | chr3  | 13231687 | 13231701 | - | 0        | 0        | 0        |
| SINE           | Alu            | B1_Mm   | chr3  | 13250226 | 13250240 | - | 0        | 0        | 0        |
| Simple_repeat  | Simple_repeat  | (A)n    | chr3  | 13294923 | 13294929 | + | 0        | 0        | 0        |
| Simple_repeat  | Simple_repeat  | (A)n    | chr3  | 13322054 | 13322057 | + | 0        | 0        | 0        |
| Low_complexity | Low_complexity | AT_rich | chr3  | 13411876 | 13411880 | + | 0        | 0        | 0        |
| SINE           | Alu            | B1_Mus2 | chr3  | 13449106 | 13449121 | + | 0        | 0        | 0        |
| Simple_repeat  | Simple_repeat  | (A)n    | chr3  | 13449121 | 13449123 | + | 0        | 0        | 0        |
| Simple_repeat  | Simple_repeat  | (A)n    | chr3  | 13470858 | 13470861 | + | 0        | 0        | 0        |
| SINE           | Alu            | B1_Mm   | chr10 | 19287667 | 19287813 | + | 0        | 0        | 0        |
| Simple_repeat  | Simple_repeat  | (A)n    | chr10 | 19287814 | 19287838 | + | 0        | 0        | 0        |
| SINE           | Alu            | B1_Mm   | chr3  | 13548560 | 13548573 | - | 0        | 0        | 0        |
| SINE           | Alu            | PB1D9   | chr3  | 13620480 | 13620491 | + | 0        | 0        | 0        |
| Simple_repeat  | Simple_repeat  | (A)n    | chr3  | 13620491 | 13620493 | + | 0        | 0        | 0        |
| SINE           | Alu            | B1_Mus2 | chr3  | 13691754 | 13691769 | - | 0        | 0        | 0        |
| SINE           | Alu            | B1_Mm   | chr11 | 29497558 | 29497704 | + | 0        | 0        | 0        |
| SINE           | Alu            | B1_Mus1 | chr3  | 13752482 | 13752494 | + | 0        | 0        | 0        |
| Simple_repeat  | Simple_repeat  | (A)n    | chr3  | 13752495 | 13752497 | + | 0        | 0        | 0        |

|                |                |         |       |          |            |          |   |          |
|----------------|----------------|---------|-------|----------|------------|----------|---|----------|
| Simple_repeat  | Simple_repeat  | (A)n    | chr3  | 13766074 | 13766078 + | 0        | 0 | 0        |
| SINE           | B2             | B2_Mm1a | chr11 | 29566743 | 29566934 + | 0        | 0 | 0        |
| LTR            | MaLR           | MTA_Mm  | chr3  | 13875111 | 13875149 + | 0        | 0 | 0        |
| SINE           | Alu            | B1_Mm   | chr3  | 14092979 | 14092993 - | 0        | 0 | 0        |
| SINE           | Alu            | B1_Mus1 | chr3  | 14100428 | 14100443 + | 0        | 0 | 0        |
| Low_complexity | Low_complexity | A-rich  | chr3  | 14100443 | 14100454 + | 0        | 0 | 0        |
| LTR            | MaLR           | MTA_Mm  | chr3  | 14184006 | 14184045 + | 0        | 0 | 0.615324 |
| Simple_repeat  | Simple_repeat  | (A)n    | chr3  | 14184241 | 14184245 + | 0        | 0 | 0        |
| LTR            | MaLR           | MTA_Mm  | chr3  | 14272344 | 14272383 - | 0        | 0 | 0        |
| Simple_repeat  | Simple_repeat  | (A)n    | chr3  | 14377402 | 14377406 + | 0        | 0 | 0        |
| Simple_repeat  | Simple_repeat  | (A)n    | chr3  | 14379113 | 14379117 + | 0        | 0 | 0        |
| Simple_repeat  | Simple_repeat  | (A)n    | chr3  | 14398471 | 14398475 + | 0        | 0 | 0        |
| SINE           | Alu            | B1_Mus2 | chr3  | 14431410 | 14431424 - | 0        | 0 | 0        |
| Simple_repeat  | Simple_repeat  | (A)n    | chr3  | 14442605 | 14442608 + | 0        | 0 | 0        |
| SINE           | Alu            | B1_Mus1 | chr3  | 14521735 | 14521749 + | 0        | 0 | 0        |
| Simple_repeat  | Simple_repeat  | (A)n    | chr3  | 14521749 | 14521752 + | 0        | 0 | 0        |
| SINE           | Alu            | B1_Mus2 | chr3  | 14587986 | 14588000 - | 0        | 0 | 0        |
| SINE           | Alu            | B1_Mus2 | chr3  | 14618538 | 14618553 - | 0        | 0 | 0        |
| SINE           | Alu            | B1_Mus1 | chr3  | 14686551 | 14686566 - | 0        | 0 | 0        |
| Simple_repeat  | Simple_repeat  | (A)n    | chr3  | 14833253 | 14833257 + | 0        | 0 | 0        |
| Simple_repeat  | Simple_repeat  | (A)n    | chr3  | 14875745 | 14875749 + | 0        | 0 | 0        |
| Simple_repeat  | Simple_repeat  | (A)n    | chr3  | 14916852 | 14916857 + | 0        | 0 | 0        |
| SINE           | B2             | B2_Mm1t | chr3  | 14916965 | 14916984 - | 0        | 0 | 0        |
| Simple_repeat  | Simple_repeat  | (A)n    | chr3  | 14917351 | 14917358 + | 0        | 0 | 0        |
| Simple_repeat  | Simple_repeat  | (A)n    | chr3  | 14925801 | 14925804 + | 0        | 0 | 0        |
| SINE           | Alu            | B1_Mus2 | chr3  | 14933073 | 14933087 - | 0        | 0 | 0        |
| SINE           | Alu            | B1_Mm   | chr3  | 15034674 | 15034689 + | 0        | 0 | 0        |
| Simple_repeat  | Simple_repeat  | (A)n    | chr3  | 15175324 | 15175328 + | 0        | 0 | 0        |
| LTR            | MaLR           | MTA_Mm  | chr3  | 15281239 | 15281278 + | 0        | 0 | 0        |
| LTR            | MaLR           | MTA_Mm  | chr3  | 15341545 | 15341584 + | 0        | 0 | 0.342623 |
| SINE           | B2             | B2_Mm1a | chr3  | 15350215 | 15350234 + | 0        | 0 | 0        |
| LTR            | MaLR           | MTB     | chr3  | 15409632 | 15409672 + | 0        | 0 | 0        |
| LTR            | MaLR           | MTB_Mm  | chr3  | 15409850 | 15409891 - | 0        | 0 | 0        |
| LTR            | MaLR           | MTA_Mm  | chr3  | 15444842 | 15444882 + | 0        | 0 | 0        |
| SINE           | Alu            | B1_Mus1 | chr11 | 31093673 | 31093821 + | 0        | 0 | 0        |
| Simple_repeat  | Simple_repeat  | (A)n    | chr11 | 31093822 | 31093846 + | 0        | 0 | 0        |
| SINE           | Alu            | B1_Mm   | chr3  | 15514032 | 15514044 + | 0        | 0 | 0        |
| Simple_repeat  | Simple_repeat  | (A)n    | chr3  | 15514044 | 15514048 + | 0        | 0 | 0        |
| Simple_repeat  | Simple_repeat  | (A)n    | chr3  | 15523969 | 15523973 + | 0        | 0 | 0        |
| Simple_repeat  | Simple_repeat  | (A)n    | chr3  | 15542001 | 15542005 + | 0        | 0 | 0        |
| SINE           | Alu            | B1_Mm   | chr3  | 15748203 | 15748218 + | 0        | 0 | 0        |
| LTR            | MaLR           | MTA_Mm  | chr11 | 31323251 | 31323647 + | 0        | 0 | 0        |
| Simple_repeat  | Simple_repeat  | (A)n    | chr3  | 15760431 | 15760434 + | 0        | 0 | 0        |
| LINE           | L1             | L1_Mus2 | chr3  | 15826022 | 15826480 - | 0        | 0 | 0        |
| LTR            | MaLR           | MTA_Mm  | chr3  | 15856558 | 15856590 + | 0.591053 | 0 | 0        |
| SINE           | Alu            | B1_Mus2 | chr3  | 15929101 | 15929116 - | 0        | 0 | 0        |
| LTR            | MaLR           | MTA_Mm  | chr4  | 3014062  | 3014455 -  | 0        | 0 | 0        |
| SINE           | Alu            | B1_Mus1 | chr4  | 3073799  | 3073918 -  | 0        | 0 | 0        |
| SINE           | Alu            | B1_Mus2 | chr4  | 3378663  | 3378798 -  | 0        | 0 | 0        |
| SINE           | Alu            | B1_Mus2 | chr4  | 3569715  | 3569861 -  | 0        | 0 | 0        |
| SINE           | Alu            | B1_Mus2 | chr4  | 3720228  | 3720373 -  | 0        | 0 | 0.615324 |
| SINE           | Alu            | B1_Mus1 | chr4  | 3736676  | 3736821 +  | 0.332194 | 0 | 0        |
| Simple_repeat  | Simple_repeat  | (A)n    | chr4  | 3736822  | 3736855 +  | 0.332194 | 0 | 0.615324 |
| SINE           | Alu            | B1_Mus2 | chr4  | 3781228  | 3781373 -  | 0        | 0 | 0        |
| Simple_repeat  | Simple_repeat  | (A)n    | chr4  | 5350835  | 5350860 +  | 0        | 0 | 0.342623 |
| LINE           | L1             | L1VL4   | chr4  | 5938064  | 5941310 -  | 0        | 0 | 0        |
| SINE           | Alu            | B1_Mus1 | chr4  | 6164096  | 6164243 +  | 0        | 0 | 0        |
| Simple_repeat  | Simple_repeat  | (A)n    | chr4  | 6164244  | 6164268 +  | 0        | 0 | 0        |
| Simple_repeat  | Simple_repeat  | (A)n    | chr4  | 6234245  | 6234298 +  | 0        | 0 | 0        |
| SINE           | Alu            | B1_Mm   | chr4  | 6398368  | 6398488 +  | 0        | 0 | 0        |
| Simple_repeat  | Simple_repeat  | (A)n    | chr4  | 6398489  | 6398533 +  | 0        | 0 | 0        |
| SINE           | Alu            | B1_Mus2 | chr4  | 6452102  | 6452248 -  | 0        | 0 | 0        |
| LTR            | MaLR           | MTA_Mm  | chr4  | 6478145  | 6478544 +  | 0        | 0 | 0        |
| LTR            | MaLR           | MTA_Mm  | chr4  | 6479640  | 6480039 +  | 0        | 0 | 0        |
| SINE           | Alu            | B1_Mur1 | chr4  | 7107751  | 7107889 -  | 0        | 0 | 0        |
| SINE           | Alu            | B1_Mm   | chr4  | 7146176  | 7146325 -  | 0        | 0 | 0        |
| Simple_repeat  | Simple_repeat  | (A)n    | chr4  | 7382583  | 7382614 +  | 0        | 0 | 0        |

|                |                |         |       |          |          |   |          |          |          |
|----------------|----------------|---------|-------|----------|----------|---|----------|----------|----------|
| LTR            | MaLR           | MTA_Mm  | chr4  | 7446578  | 7446966  | - | 0        | 0        | 0        |
| Simple_repeat  | Simple_repeat  | (A)n    | chr4  | 7825165  | 7825215  | + | 0        | 0        | 0        |
| SINE           | Alu            | B1_Mm   | chr4  | 7888196  | 7888329  | - | 0        | 0        | 0        |
| SINE           | Alu            | B1_Mus2 | chr4  | 8026375  | 8026523  | - | 0        | 0        | 0        |
| LTR            | MaLR           | MTA_Mm  | chr4  | 8440128  | 8440523  | - | 0        | 0        | 0        |
| LTR            | MaLR           | MTA_Mm  | chr4  | 8441621  | 8442016  | - | 0        | 0        | 0        |
| Simple_repeat  | Simple_repeat  | (A)n    | chr4  | 8442877  | 8442903  | + | 0        | 0        | 0        |
| Simple_repeat  | Simple_repeat  | (A)n    | chr4  | 8569975  | 8569997  | + | 0        | 0        | 0        |
| Simple_repeat  | Simple_repeat  | (A)n    | chr4  | 8611681  | 8611702  | + | 0        | 0        | 0        |
| SINE           | Alu            | B1_Mus2 | chr11 | 32024718 | 32024865 | + | 0        | 0        | 0        |
| Simple_repeat  | Simple_repeat  | (A)n    | chr11 | 32024866 | 32024889 | + | 0        | 0        | 0        |
| LTR            | MaLR           | MTEa    | chr4  | 8896206  | 8896583  | - | 0        | 0        | 0        |
| SINE           | Alu            | PB1D9   | chr4  | 9047076  | 9047193  | + | 0        | 0        | 0        |
| Simple_repeat  | Simple_repeat  | (A)n    | chr4  | 9047194  | 9047228  | + | 0        | 0        | 0        |
| SINE           | Alu            | B1_Mm   | chr4  | 9608727  | 9608873  | + | 0        | 0        | 0        |
| Simple_repeat  | Simple_repeat  | (A)n    | chr4  | 9608874  | 9608897  | + | 0        | 0        | 0        |
| LTR            | MaLR           | MTA_Mm  | chr4  | 9694928  | 9695323  | - | 0        | 0        | 0        |
| LINE           | L1             | L1_Mus1 | chr4  | 10055682 | 10061390 | - | 0        | 0        | 0        |
| LTR            | MaLR           | MTA_Mm  | chr4  | 10229581 | 10229962 | - | 0        | 0        | 0        |
| LTR            | MaLR           | MTA_Mm  | chr4  | 10231059 | 10231454 | - | 0        | 0        | 0        |
| Simple_repeat  | Simple_repeat  | (A)n    | chr4  | 10800300 | 10800338 | + | 0        | 0        | 0        |
| LTR            | MaLR           | MTA_Mm  | chr4  | 10885026 | 10885421 | - | 0        | 0        | 0        |
| LTR            | MaLR           | MTA_Mm  | chr4  | 10886514 | 10886909 | - | 0        | 0        | 0        |
| Simple_repeat  | Simple_repeat  | (A)n    | chr4  | 10915401 | 10915435 | + | 0        | 0        | 0        |
| SINE           | Alu            | B1_Mus2 | chr4  | 11397676 | 11397821 | - | 0        | 0        | 0        |
| SINE           | Alu            | B1_Mus1 | chr4  | 11669591 | 11669738 | - | 0        | 0        | 0        |
| Simple_repeat  | Simple_repeat  | (A)n    | chr4  | 11865134 | 11865163 | + | 0        | 0        | 0        |
| SINE           | Alu            | B1_Mm   | chr4  | 11947851 | 11947993 | + | 0        | 0        | 0        |
| Simple_repeat  | Simple_repeat  | (A)n    | chr4  | 11947994 | 11948021 | + | 0        | 0        | 0        |
| Simple_repeat  | Simple_repeat  | (A)n    | chr4  | 12680998 | 12681034 | + | 0        | 0        | 0        |
| LINE           | L1             | L1_Mus2 | chr4  | 12915295 | 12921364 | - | 0        | 0        | 0        |
| Simple_repeat  | Simple_repeat  | (A)n    | chr4  | 13361888 | 13361914 | + | 0        | 0        | 0        |
| Simple_repeat  | Simple_repeat  | (A)n    | chr4  | 13634284 | 13634320 | + | 0        | 0        | 0        |
| SINE           | Alu            | B1_Mm   | chr11 | 32428918 | 32429065 | + | 0.591053 | 0        | 0        |
| Simple_repeat  | Simple_repeat  | (A)n    | chr11 | 32429066 | 32429091 | + | 0        | 0        | 0.342623 |
| LTR            | MaLR           | MTA_Mm  | chr4  | 14000339 | 14000734 | + | 0        | 0        | 0        |
| LTR            | MaLR           | MTA_Mm  | chr4  | 14042330 | 14042723 | + | 0        | 0        | 0        |
| SINE           | Alu            | B1_Mus1 | chr4  | 14762929 | 14763076 | + | 0        | 0        | 0        |
| LTR            | MaLR           | MTA_Mm  | chr4  | 15136900 | 15137299 | - | 0        | 0        | 0        |
| Simple_repeat  | Simple_repeat  | (A)n    | chr4  | 15652389 | 15652450 | + | 0        | 0.708814 | 0        |
| SINE           | Alu            | B1_Mm   | chr4  | 16868135 | 16868276 | + | 0        | 0        | 0        |
| Simple_repeat  | Simple_repeat  | (A)n    | chr4  | 16868277 | 16868300 | + | 0        | 0        | 0        |
| Simple_repeat  | Simple_repeat  | (A)n    | chr4  | 18053266 | 18053324 | + | 0.332194 | 0.708814 | 0.957947 |
| LTR            | MaLR           | MTA_Mm  | chr4  | 18185860 | 18186250 | - | 0        | 0        | 0        |
| LTR            | MaLR           | MTA_Mm  | chr4  | 18232111 | 18232499 | + | 0        | 0        | 0        |
| SINE           | Alu            | B1_Mus2 | chr4  | 18770301 | 18770447 | - | 0        | 0        | 0        |
| LTR            | MaLR           | MTA_Mm  | chr4  | 18894286 | 18894680 | + | 0        | 0        | 0        |
| Simple_repeat  | Simple_repeat  | (A)n    | chr4  | 19704047 | 19704074 | + | 0        | 0        | 0        |
| LINE           | L1             | L1Md_F2 | chr4  | 19710823 | 19716403 | + | 0        | 0        | 0        |
| Simple_repeat  | Simple_repeat  | (A)n    | chr4  | 20753732 | 20753777 | + | 0        | 0        | 0        |
| LTR            | MaLR           | MTA_Mm  | chr4  | 21143107 | 21143497 | + | 0        | 0        | 0        |
| LTR            | MaLR           | MTA_Mm  | chr4  | 21289318 | 21289709 | - | 0        | 0        | 0        |
| LTR            | MaLR           | MTA_Mm  | chr4  | 21770608 | 21771007 | + | 0        | 0        | 0        |
| Simple_repeat  | Simple_repeat  | (A)n    | chr4  | 22627283 | 22627304 | + | 0.591053 | 0        | 0        |
| LTR            | MaLR           | MTA_Mm  | chr4  | 22708514 | 22708909 | - | 0        | 0        | 0        |
| SINE           | Alu            | B1_Mm   | chr11 | 33074335 | 33074480 | - | 0        | 0        | 0        |
| Simple_repeat  | Simple_repeat  | (A)n    | chr4  | 22761293 | 22761331 | + | 0        | 0        | 0        |
| LTR            | MaLR           | MTA_Mm  | chr4  | 22891566 | 22891960 | + | 0        | 0        | 0        |
| LINE           | L1             | L1Md_T  | chr4  | 23021702 | 23028342 | - | 0        | 0        | 0        |
| Low_complexity | Low_complexity | A-rich  | chr4  | 23205350 | 23205436 | + | 0        | 0        | 0        |
| LTR            | MaLR           | MTA_Mm  | chr4  | 23299286 | 23299680 | + | 0        | 0        | 0        |
| LTR            | MaLR           | MTA_Mm  | chr4  | 23429776 | 23430171 | - | 0        | 0        | 0        |
| Simple_repeat  | Simple_repeat  | (A)n    | chr4  | 23532611 | 23532640 | + | 0        | 0        | 0        |
| Simple_repeat  | Simple_repeat  | (A)n    | chr4  | 23692776 | 23692813 | + | 0        | 0        | 0        |
| LINE           | L1             | L1_Mus1 | chr4  | 23969521 | 23975351 | - | 0        | 0        | 0        |
| LTR            | MaLR           | MTA_Mm  | chr4  | 24064943 | 24065332 | - | 0        | 0        | 0        |
| SINE           | Alu            | B1_Mus1 | chr4  | 24087560 | 24087706 | + | 0.332194 | 0        | 0        |

|                |                |         |       |                     |          |          |          |
|----------------|----------------|---------|-------|---------------------|----------|----------|----------|
| Simple_repeat  | Simple_repeat  | (A)n    | chr4  | 24128331 24128376 + | 0        | 0        | 0        |
| LTR            | MaLR           | MTA_Mm  | chr4  | 24313510 24313905 + | 0        | 0        | 0        |
| SINE           | Alu            | B1_Mus2 | chr4  | 24407120 24407266 + | 0        | 0        | 0        |
| SINE           | Alu            | B1_Mm   | chr4  | 25323459 25323603 + | 0        | 0        | 0        |
| SINE           | Alu            | B1_Mus1 | chr4  | 25349148 25349286 - | 0        | 0        | 0        |
| Simple_repeat  | Simple_repeat  | (A)n    | chr4  | 25478843 25478910 + | 0        | 0        | 0        |
| LTR            | MaLR           | MTA_Mm  | chr4  | 26972586 26972976 - | 0        | 0        | 0        |
| Simple_repeat  | Simple_repeat  | (A)n    | chr4  | 27022466 27022505 + | 0        | 0        | 0        |
| Simple_repeat  | Simple_repeat  | (A)n    | chr4  | 27064647 27064704 + | 0        | 0        | 0        |
| SINE           | Alu            | B1_Mus2 | chr4  | 27294488 27294634 + | 0        | 0        | 0        |
| Simple_repeat  | Simple_repeat  | (A)n    | chr4  | 27294635 27294697 + | 0        | 0        | 0        |
| SINE           | B2             | B2_Mm2  | chr4  | 27514743 27514905 - | 0        | 0        | 0        |
| Simple_repeat  | Simple_repeat  | (A)n    | chr4  | 27650342 27650371 + | 0        | 0        | 0        |
| Simple_repeat  | Simple_repeat  | (A)n    | chr4  | 28093003 28093036 + | 0        | 0        | 0        |
| LTR            | MaLR           | MTA_Mm  | chr4  | 28950004 28950402 + | 0        | 0        | 0        |
| SINE           | Alu            | B1_Mm   | chr4  | 29564094 29564230 - | 0        | 0        | 0        |
| SINE           | Alu            | B1_Mus1 | chr4  | 29620025 29620171 - | 0        | 0        | 0        |
| LINE           | L1             | L1Md_F2 | chr4  | 29795118 29801437 - | 0        | 0        | 0        |
| SINE           | Alu            | B1_Mus1 | chr4  | 29840790 29840935 - | 0        | 0        | 0        |
| Simple_repeat  | Simple_repeat  | (A)n    | chr4  | 30382638 30382682 + | 0        | 0        | 0        |
| SINE           | B2             | B3A     | chr4  | 30828775 30828972 - | 0        | 0        | 0        |
| Simple_repeat  | Simple_repeat  | (A)n    | chr4  | 31468380 31468414 + | 0        | 0        | 0        |
| LTR            | MaLR           | MTA_Mm  | chr4  | 31783053 31783445 - | 0        | 0        | 0        |
| SINE           | Alu            | B1_Mus1 | chr4  | 32049000 32049137 - | 0        | 0        | 0        |
| SINE           | Alu            | B1_Mus2 | chr4  | 32158334 32158481 - | 0        | 0        | 0        |
| Low_complexity | Low_complexity | A-rich  | chr4  | 32742344 32742414 + | 0        | 0        | 0        |
| SINE           | B2             | B2_Mm1a | chr4  | 33063628 33063813 + | 0        | 0        | 0        |
| SINE           | Alu            | B1_Mm   | chr4  | 33396534 33396680 + | 0        | 0        | 0        |
| Simple_repeat  | Simple_repeat  | (A)n    | chr4  | 33396681 33396708 + | 0        | 0        | 0        |
| LTR            | MaLR           | MTA_Mm  | chr4  | 33693507 33693902 + | 0        | 0        | 0        |
| LTR            | MaLR           | MTA_Mm  | chr4  | 33708858 33709254 + | 0        | 0        | 0        |
| SINE           | B2             | B2_Mm1a | chr4  | 35113758 35113950 + | 0        | 0        | 0        |
| SINE           | B2             | B2_Mm1t | chr4  | 35123347 35123538 - | 0        | 0        | 0        |
| SINE           | Alu            | B1_Mm   | chr4  | 35185531 35185683 + | 0        | 0        | 0.615324 |
| LTR            | MaLR           | MTA_Mm  | chr4  | 35553759 35554139 + | 0        | 0        | 0        |
| LTR            | ERVK           | RMER6C  | chr4  | 37877886 37878552 - | 0        | 0        | 0        |
| Simple_repeat  | Simple_repeat  | (A)n    | chr4  | 37922299 37922335 + | 0        | 0        | 0        |
| LINE           | L1             | L1Md_F2 | chr4  | 38161519 38166913 + | 0        | 0        | 0        |
| SINE           | Alu            | B1_Mm   | chr4  | 38328185 38328331 + | 0        | 0        | 0        |
| SINE           | Alu            | B1_Mus2 | chr4  | 39679015 39679160 + | 0        | 0        | 0        |
| Simple_repeat  | Simple_repeat  | (A)n    | chr4  | 39679161 39679188 + | 0        | 0        | 0        |
| LTR            | MaLR           | MTA_Mm  | chr4  | 39779380 39779774 + | 0        | 0        | 0        |
| LTR            | MaLR           | MTA_Mm  | chr4  | 40316374 40316765 + | 0        | 0        | 0        |
| SINE           | Alu            | B1_Mus2 | chr4  | 40596879 40597001 - | 0        | 0        | 0        |
| Simple_repeat  | Simple_repeat  | (A)n    | chr4  | 40627381 40627447 + | 0        | 0        | 0        |
| SINE           | Alu            | B1_Mur2 | chr4  | 41436960 41437108 + | 0.591053 | 0        | 0        |
| Simple_repeat  | Simple_repeat  | (A)n    | chr4  | 41437109 41437132 + | 0        | 0        | 0        |
| LTR            | MaLR           | MTA_Mm  | chr4  | 41696687 41697073 + | 0        | 0        | 0        |
| Simple_repeat  | Simple_repeat  | (A)n    | chr4  | 42233390 42233422 + | 0        | 0        | 0        |
| LTR            | MaLR           | MTB     | chr4  | 42919796 42920185 - | 0        | 0        | 0        |
| SINE           | Alu            | B1_Mus1 | chr4  | 43029974 43030120 + | 0        | 0        | 0        |
| Simple_repeat  | Simple_repeat  | (A)n    | chr4  | 43030121 43030143 + | 0        | 0        | 0        |
| SINE           | Alu            | B1_Mus1 | chr4  | 43475439 43475586 - | 0        | 0        | 0        |
| SINE           | Alu            | B1_Mus2 | chr4  | 43622574 43622703 + | 0        | 0        | 0        |
| Simple_repeat  | Simple_repeat  | (A)n    | chr4  | 43622704 43622739 + | 0        | 0        | 0        |
| Simple_repeat  | Simple_repeat  | (A)n    | chr4  | 43846753 43846791 + | 0        | 0        | 0        |
| Simple_repeat  | Simple_repeat  | (A)n    | chr4  | 44011056 44011082 + | 0        | 0        | 0        |
| SINE           | Alu            | B1_Mm   | chr4  | 44303118 44303263 - | 0        | 0        | 0        |
| SINE           | B2             | B2_Mm1a | chr4  | 44306747 44306938 - | 0        | 0.380568 | 0        |
| Simple_repeat  | Simple_repeat  | (A)n    | chr4  | 44480689 44480722 + | 0        | 0        | 0        |
| LTR            | MaLR           | MTA_Mm  | chr4  | 44970626 44971023 - | 0        | 0        | 0        |
| Simple_repeat  | Simple_repeat  | (A)n    | chr4  | 44987617 44987649 + | 0        | 0        | 0        |
| SINE           | Alu            | B1_Mus1 | chr4  | 45643159 45643305 - | 0        | 0        | 0        |
| LTR            | MaLR           | MTA_Mm  | chr4  | 45672824 45673216 - | 0        | 0        | 0        |
| Simple_repeat  | Simple_repeat  | (A)n    | chr11 | 35649532 35649582 + | 0        | 0        | 0        |
| LTR            | MaLR           | MTA_Mm  | chr4  | 47510223 47510616 + | 0        | 0        | 0        |
| SINE           | Alu            | B1_Mus2 | chr4  | 47931424 47931570 - | 0        | 0        | 0        |

|               |               |          |       |                     |          |          |          |
|---------------|---------------|----------|-------|---------------------|----------|----------|----------|
| SINE          | Alu           | B1_Mm    | chr4  | 48517505 48517651 + | 0        | 0        | 0        |
| SINE          | Alu           | B1_Mus1  | chr4  | 48540202 48540352 + | 0        | 0        | 0        |
| Simple_repeat | Simple_repeat | (A)n     | chr4  | 48540353 48540377 + | 0        | 0        | 0        |
| Simple_repeat | Simple_repeat | (A)n     | chr4  | 49615940 49615966 + | 0        | 0.708814 | 0        |
| SINE          | Alu           | B1_Mus1  | chr4  | 49642383 49642530 + | 0        | 0        | 0        |
| LTR           | MaLR          | MTA_Mm   | chr4  | 49931280 49931674 + | 0        | 0        | 0        |
| LINE          | L1            | L1_Mus1  | chr4  | 50310116 50315638 - | 0        | 0        | 0        |
| SINE          | Alu           | B1_Mm    | chr4  | 51103091 51103237 - | 0        | 0        | 0        |
| Simple_repeat | Simple_repeat | (A)n     | chr4  | 51275579 51275621 + | 0        | 0        | 0        |
| SINE          | Alu           | B1_Mus1  | chr4  | 51513640 51513787 + | 0        | 0        | 0        |
| Simple_repeat | Simple_repeat | (A)n     | chr4  | 51513788 51513872 + | 0        | 0        | 0        |
| SINE          | Alu           | B1_Mus1  | chr4  | 51773017 51773164 - | 0        | 0        | 0        |
| SINE          | Alu           | B1_Mm    | chr4  | 52777304 52777450 - | 0        | 0        | 0        |
| LINE          | L1            | L1Md_T   | chr4  | 53399667 53405975 - | 0        | 0        | 0        |
| Simple_repeat | Simple_repeat | (A)n     | chr4  | 53410395 53410426 + | 0        | 0        | 0        |
| SINE          | Alu           | B1_Mm    | chr4  | 53952595 53952740 - | 0.332194 | 0        | 0        |
| LTR           | MaLR          | MTA_Mm   | chr4  | 53978052 53978440 - | 0        | 0        | 0        |
| SINE          | Alu           | B1_Mus1  | chr4  | 53984327 53984474 + | 0        | 0        | 0        |
| Simple_repeat | Simple_repeat | (A)n     | chr4  | 53984475 53984499 + | 0        | 0        | 0        |
| Simple_repeat | Simple_repeat | (A)n     | chr4  | 54040906 54040950 + | 0        | 0        | 0        |
| LINE          | L1            | L1Md_T   | chr4  | 54683065 54689756 - | 0        | 0        | 0        |
| Simple_repeat | Simple_repeat | (A)n     | chr4  | 54940717 54940745 + | 0        | 0        | 0        |
| Simple_repeat | Simple_repeat | (A)n     | chr4  | 54940837 54940867 + | 0        | 0        | 0        |
| SINE          | Alu           | B1_Mus2  | chr4  | 55249561 55249707 + | 0        | 0        | 0        |
| Simple_repeat | Simple_repeat | (A)n     | chr4  | 55249708 55249747 + | 0        | 0        | 0        |
| SINE          | Alu           | B1_Mm    | chr4  | 55320534 55320678 + | 0        | 0        | 0        |
| Simple_repeat | Simple_repeat | (A)n     | chr4  | 55355937 55355977 + | 0        | 0        | 0        |
| LTR           | MaLR          | MTB_Mm   | chr4  | 55422717 55423113 + | 0        | 0        | 0        |
| SINE          | Alu           | B1_Mm    | chr4  | 55482170 55482317 + | 0        | 0        | 0        |
| Simple_repeat | Simple_repeat | (A)n     | chr4  | 55482318 55482348 + | 0        | 0        | 0        |
| SINE          | Alu           | B1_Mm    | chr4  | 57843339 57843485 - | 0        | 0        | 0        |
| LINE          | L1            | L1Md_T   | chr4  | 58024858 58031068 - | 0        | 0        | 0        |
| SINE          | Alu           | B1_Mm    | chr4  | 59144276 59144422 - | 0        | 0        | 0        |
| Simple_repeat | Simple_repeat | (A)n     | chr4  | 59275417 59275484 + | 0        | 0        | 0        |
| SINE          | Alu           | B1_Mm    | chr4  | 59584603 59584746 - | 0        | 0        | 0        |
| Simple_repeat | Simple_repeat | (A)n     | chr4  | 61946739 61946775 + | 0        | 0        | 0        |
| SINE          | Alu           | B1_Mus2  | chr4  | 62183082 62183219 + | 0        | 0        | 0        |
| Simple_repeat | Simple_repeat | (A)n     | chr4  | 62183220 62183243 + | 0        | 0        | 0        |
| SINE          | B2            | B2_Mm1t  | chr11 | 37686231 37686420 - | 0        | 0        | 0.615324 |
| Simple_repeat | Simple_repeat | (A)n     | chr11 | 37707494 37707530 + | 0        | 0        | 0        |
| Simple_repeat | Simple_repeat | (A)n     | chr4  | 63483229 63483282 + | 0        | 0        | 0.342623 |
| LTR           | MaLR          | MTA_Mm   | chr4  | 64632789 64633184 - | 0        | 0        | 0        |
| SINE          | Alu           | B1_Mm    | chr11 | 37913545 37913690 + | 0        | 0        | 0        |
| LINE          | L1            | L1Md_T   | chr4  | 66292354 66299296 - | 0        | 0        | 0        |
| SINE          | Alu           | B1_Mus2  | chr4  | 66511754 66511923 + | 0        | 0        | 0        |
| Simple_repeat | Simple_repeat | (A)n     | chr4  | 66534598 66534642 + | 0        | 0        | 0        |
| SINE          | Alu           | B1_Mus1  | chr4  | 66796993 66797134 + | 0        | 0        | 0        |
| Simple_repeat | Simple_repeat | (A)n     | chr4  | 66797135 66797179 + | 0        | 0        | 0        |
| Simple_repeat | Simple_repeat | (A)n     | chr4  | 67086673 67086700 + | 0        | 0        | 0        |
| SINE          | Alu           | B1_Mm    | chr4  | 67236896 67237041 + | 0        | 0        | 0        |
| Simple_repeat | Simple_repeat | (A)n     | chr4  | 67624523 67624549 + | 0        | 0        | 0        |
| Simple_repeat | Simple_repeat | (A)n     | chr4  | 67768927 67768969 + | 0        | 0        | 0        |
| SINE          | Alu           | B1_Mm    | chr4  | 67798823 67798969 + | 0        | 0        | 0        |
| Simple_repeat | Simple_repeat | (A)n     | chr4  | 67798970 67799010 + | 0        | 0        | 0        |
| Simple_repeat | Simple_repeat | (A)n     | chr4  | 68173074 68173115 + | 0.332194 | 0        | 0        |
| SINE          | Alu           | B1_Mus1  | chr4  | 68274007 68274153 - | 0        | 0        | 0        |
| SINE          | Alu           | B1_Mus2  | chr4  | 68348928 68349073 + | 0        | 0.380568 | 0        |
| LTR           | MaLR          | MTA_Mm   | chr4  | 68934271 68934665 - | 0        | 0        | 0.615324 |
| LTR           | MaLR          | MTA_Mm   | chr4  | 69104219 69104613 - | 0        | 0        | 0        |
| Simple_repeat | Simple_repeat | (A)n     | chr4  | 69489105 69489135 + | 0.332194 | 0        | 0        |
| LINE          | L1            | L1Md_F2  | chr4  | 70385447 70390478 + | 0        | 0        | 0        |
| SINE          | Alu           | B1_Mm    | chr4  | 70630602 70630747 + | 0        | 0        | 0        |
| Simple_repeat | Simple_repeat | (A)n     | chr4  | 70630748 70630777 + | 0        | 0        | 0        |
| LTR           | MaLR          | MTA_Mm   | chr4  | 70648761 70649156 + | 0        | 0        | 0        |
| Simple_repeat | Simple_repeat | (A)n     | chr4  | 72162917 72162965 + | 0        | 0        | 0        |
| Simple_repeat | Simple_repeat | (A)n     | chr4  | 72249869 72249916 + | 0        | 0        | 0        |
| LTR           | ERVK          | RLTR13D6 | chr4  | 72380999 72381762 - | 0        | 0        | 0        |

|               |               |         |       |                     |          |          |          |
|---------------|---------------|---------|-------|---------------------|----------|----------|----------|
| SINE          | Alu           | B1_Mus2 | chr4  | 73068672 73068815 - | 0        | 0        | 0        |
| Simple_repeat | Simple_repeat | (A)n    | chr4  | 73115255 73115293 + | 0        | 0        | 0        |
| LTR           | MaLR          | MTA_Mm  | chr4  | 73127559 73127953 - | 0        | 0        | 0        |
| SINE          | Alu           | B1_Mus1 | chr4  | 73855309 73855455 + | 0.591053 | 0.708814 | 0.342623 |
| Simple_repeat | Simple_repeat | (A)n    | chr4  | 74161359 74161402 + | 0        | 0        | 0        |
| Simple_repeat | Simple_repeat | (A)n    | chr4  | 74750548 74750578 + | 0        | 0        | 0.342623 |
| LTR           | MaLR          | MTA_Mm  | chr4  | 74963922 74964318 - | 0        | 0        | 0        |
| Simple_repeat | Simple_repeat | (A)n    | chr4  | 74968815 74968862 + | 0        | 0        | 0        |
| SINE          | Alu           | B1_Mus1 | chr4  | 75070524 75070670 + | 0        | 0        | 0        |
| Simple_repeat | Simple_repeat | (A)n    | chr4  | 75070671 75070700 + | 0        | 0        | 0        |
| Simple_repeat | Simple_repeat | (A)n    | chr11 | 38943030 38943060 + | 0        | 0        | 0        |
| Simple_repeat | Simple_repeat | (A)n    | chr11 | 38949656 38949682 + | 0        | 0        | 0        |
| SINE          | Alu           | B1_Mm   | chr11 | 39035338 39035485 - | 0        | 0        | 0        |
| LINE          | L1            | L1Md_F3 | chr4  | 78081594 78087717 - | 0        | 0        | 0        |
| LINE          | L1            | Lx3A    | chr4  | 78236009 78242084 - | 0        | 0        | 0        |
| LTR           | MaLR          | MTA_Mm  | chr4  | 78330325 78330721 + | 0        | 0        | 0        |
| LTR           | MaLR          | MTA_Mm  | chr11 | 39208683 39209077 - | 0        | 0        | 0.615324 |
| LTR           | MaLR          | MTA_Mm  | chr4  | 78494880 78495276 + | 0        | 0        | 0        |
| SINE          | Alu           | B1_Mus1 | chr4  | 78528151 78528298 - | 0        | 0        | 0        |
| Simple_repeat | Simple_repeat | (A)n    | chr4  | 78617374 78617399 + | 0        | 0        | 0        |
| LINE          | L1            | L1Md_F2 | chr4  | 78621922 78626952 - | 0        | 0        | 0        |
| LINE          | L1            | L1Md_F2 | chr4  | 79161176 79166486 - | 0        | 0        | 0        |
| SINE          | Alu           | B1_Mus1 | chr4  | 79283352 79283479 - | 0        | 0        | 0        |
| LINE          | L1            | L1_Mus3 | chr4  | 79307124 79312528 - | 0        | 0        | 0        |
| SINE          | Alu           | B1_Mus2 | chr11 | 39380534 39380679 - | 0.332194 | 0        | 0        |
| Simple_repeat | Simple_repeat | (A)n    | chr4  | 80191916 80191954 + | 0        | 0        | 0.342623 |
| Simple_repeat | Simple_repeat | (A)n    | chr4  | 81332754 81332801 + | 0        | 0        | 0        |
| Simple_repeat | Simple_repeat | (A)n    | chr4  | 81374077 81374112 + | 0        | 0        | 0        |
| SINE          | Alu           | B1_Mus1 | chr11 | 39508462 39508605 + | 0        | 0        | 0        |
| Simple_repeat | Simple_repeat | (A)n    | chr11 | 39508606 39508642 + | 0        | 0        | 0        |
| LINE          | L1            | L1Md_T  | chr4  | 81833098 81839570 - | 0        | 0        | 0        |
| Simple_repeat | Simple_repeat | (A)n    | chr4  | 82333728 82333758 + | 0        | 0        | 0        |
| Simple_repeat | Simple_repeat | (A)n    | chr4  | 83590327 83590356 + | 0        | 0        | 0        |
| SINE          | Alu           | B1_Mm   | chr4  | 84476717 84476862 - | 0        | 0        | 0        |
| LINE          | L1            | L1Md_T  | chr4  | 85053278 85059536 - | 0.332194 | 0        | 0        |
| SINE          | Alu           | B1_Mm   | chr4  | 85141714 85141860 + | 0        | 0.708814 | 0        |
| Simple_repeat | Simple_repeat | (A)n    | chr4  | 85141861 85141887 + | 0        | 0        | 0        |
| Simple_repeat | Simple_repeat | (A)n    | chr4  | 85250840 85250918 + | 0.591053 | 0.380568 | 0        |
| Simple_repeat | Simple_repeat | (A)n    | chr4  | 86372602 86372627 + | 0        | 0        | 0        |
| SINE          | Alu           | B1_Mm   | chr4  | 86498394 86498532 - | 1.58764  | 0.380568 | 1.84597  |
| SINE          | B2            | B2_Mm2  | chr4  | 86509973 86510151 + | 0        | 0.708814 | 0        |
| SINE          | Alu           | B1_Mus2 | chr11 | 40105350 40105497 - | 0        | 0        | 0        |
| Simple_repeat | Simple_repeat | (A)n    | chr4  | 87107878 87107914 + | 0        | 0        | 0        |
| Simple_repeat | Simple_repeat | (A)n    | chr4  | 87260185 87260232 + | 0        | 0        | 0        |
| Simple_repeat | Simple_repeat | (A)n    | chr4  | 87330405 87330427 + | 0        | 0        | 0        |
| LTR           | MaLR          | MTA_Mm  | chr4  | 88656837 88657232 + | 0        | 0        | 0        |
| LINE          | L1            | L1Md_T  | chr4  | 89381050 89386227 + | 0        | 0        | 0        |
| LTR           | MaLR          | MTA_Mm  | chr4  | 90034151 90034546 + | 0        | 0        | 0        |
| LTR           | MaLR          | MTD     | chr4  | 90047842 90048269 + | 0        | 0        | 0        |
| SINE          | Alu           | B1_Mm   | chr4  | 90135846 90135992 + | 0        | 0        | 0        |
| LINE          | L1            | L1Md_T  | chr4  | 90220445 90226938 - | 0        | 0        | 0        |
| SINE          | Alu           | B1_Mm   | chr4  | 90683429 90683575 - | 0        | 0        | 0        |
| Simple_repeat | Simple_repeat | (A)n    | chr11 | 40453841 40453884 + | 0        | 0        | 0        |
| LTR           | MaLR          | MTA_Mm  | chr11 | 40456214 40456608 + | 0        | 0        | 0        |
| Simple_repeat | Simple_repeat | (A)n    | chr4  | 91067056 91067095 + | 0.332194 | 0        | 0        |
| LINE          | L1            | L1_Mus3 | chr4  | 92302151 92308336 - | 0        | 0        | 0        |
| LTR           | MaLR          | MTA_Mm  | chr4  | 92417264 92417658 + | 0        | 0        | 0        |
| LTR           | MaLR          | MTA_Mm  | chr4  | 92418758 92419152 + | 0        | 0        | 0        |
| Simple_repeat | Simple_repeat | (A)n    | chr4  | 92858997 92859021 + | 0        | 0        | 0        |
| SINE          | Alu           | B1_Mus2 | chr4  | 93238234 93238380 - | 0        | 0        | 0        |
| SINE          | Alu           | B1F2    | chr11 | 40788706 40788827 - | 0        | 0        | 0        |
| SINE          | Alu           | B1_Mm   | chr4  | 96367563 96367710 + | 0        | 0        | 0        |
| Simple_repeat | Simple_repeat | (A)n    | chr4  | 96367711 96367760 + | 0        | 0        | 0        |
| SINE          | Alu           | B1_Mus2 | chr4  | 97064985 97065133 + | 0        | 0        | 0        |
| Simple_repeat | Simple_repeat | (A)n    | chr4  | 98515058 98515077 + | 0        | 0        | 0        |
| SINE          | Alu           | B1_Mus2 | chr4  | 98519091 98519237 + | 0        | 0        | 0        |
| Simple_repeat | Simple_repeat | (A)n    | chr4  | 98519238 98519283 + | 0        | 0        | 0.342623 |

|               |               |         |       |                     |          |          |          |
|---------------|---------------|---------|-------|---------------------|----------|----------|----------|
| SINE          | Alu           | B1_Mm   | chr4  | 98519284 98519428 + | 0        | 0        | 0.342623 |
| Simple_repeat | Simple_repeat | (A)n    | chr4  | 98519429 98519457 + | 0        | 0        | 0.342623 |
| LTR           | MaLR          | MTB     | chr4  | 98547444 98547837 - | 0        | 0        | 0        |
| Simple_repeat | Simple_repeat | (A)n    | chr4  | 98590274 98590310 + | 0        | 0        | 0        |
| Simple_repeat | Simple_repeat | (A)n    | chr4  | 99106879 99106904 + | 0        | 0        | 0        |
| LTR           | MaLR          | MTA_Mm  | chr4  | 99157705 99158100 + | 0.332194 | 0        | 0        |
| Simple_repeat | Simple_repeat | (TTTA)n | chr4  | 99314056 99314094 + | 0        | 0        | 0        |
| SINE          | Alu           | B1_Mm   | chr11 | 41477511 41477634 + | 0        | 0        | 0        |
| Simple_repeat | Simple_repeat | (A)n    | chr4  | 10097471 10097474 + | 0.332194 | 0        | 0        |
| SINE          | Alu           | B1_Mus1 | chr11 | 41564180 41564327 + | 0        | 0        | 0        |
| Simple_repeat | Simple_repeat | (A)n    | chr11 | 41564328 41564354 + | 0        | 0        | 0        |
| SINE          | Alu           | B1_Mus1 | chr4  | 10155174 10155189 + | 0        | 0        | 0        |
| SINE          | Alu           | B1_Mm   | chr4  | 10160411 10160425 + | 0        | 0        | 0        |
| Simple_repeat | Simple_repeat | (A)n    | chr4  | 10160425 10160429 + | 0        | 0        | 0        |
| SINE          | Alu           | B1_Mm   | chr4  | 10163097 10163112 + | 0        | 0        | 0        |
| Simple_repeat | Simple_repeat | (A)n    | chr4  | 10163112 10163117 + | 0        | 0        | 0        |
| Simple_repeat | Simple_repeat | (A)n    | chr4  | 10190176 10190178 + | 1.18211  | 0.708814 | 3.05526  |
| Simple_repeat | Simple_repeat | (A)n    | chr4  | 10236818 10236821 + | 0        | 0        | 0        |
| Simple_repeat | Simple_repeat | (A)n    | chr4  | 10318152 10318162 + | 0        | 0        | 0        |
| Simple_repeat | Simple_repeat | (A)n    | chr4  | 10338550 10338553 + | 3.28746  | 4.63345  | 1.82461  |
| SINE          | Alu           | B1_Mus1 | chr4  | 10347268 10347283 - | 0        | 0        | 0        |
| Simple_repeat | Simple_repeat | (A)n    | chr4  | 10376897 10376901 + | 0        | 0        | 0        |
| SINE          | Alu           | B1_Mus2 | chr4  | 10494199 10494213 + | 0        | 0        | 0        |
| Simple_repeat | Simple_repeat | (A)n    | chr4  | 10494214 10494217 + | 0        | 0        | 0.342623 |
| LINE          | L1            | L1Md_T  | chr4  | 10496511 10497198 - | 0        | 0        | 0        |
| Simple_repeat | Simple_repeat | (A)n    | chr4  | 10512663 10512668 + | 0        | 0        | 0        |
| LTR           | MaLR          | MTA_Mm  | chr11 | 42032811 42033210 - | 0        | 0        | 0        |
| Simple_repeat | Simple_repeat | (A)n    | chr4  | 10581240 10581246 + | 0        | 0        | 0        |
| SINE          | Alu           | B1_Mus1 | chr4  | 10640109 10640124 - | 0        | 0        | 0        |
| SINE          | Alu           | B1_Mus1 | chr4  | 10650798 10650813 + | 0        | 0        | 0        |
| Simple_repeat | Simple_repeat | (A)n    | chr4  | 10650813 10650816 + | 0        | 0        | 0        |
| SINE          | B2            | B2_Mm1a | chr4  | 10689370 10689389 + | 0        | 0        | 0        |
| Simple_repeat | Simple_repeat | (A)n    | chr11 | 42218746 42218773 + | 0        | 0        | 0        |
| SINE          | Alu           | B1_Mus2 | chr4  | 10760834 10760849 - | 0        | 0        | 0        |
| LTR           | MaLR          | MTA_Mm  | chr4  | 10809347 10809386 - | 0        | 0        | 0        |
| LTR           | MaLR          | MTA_Mm  | chr4  | 10809494 10809534 - | 0        | 0        | 0        |
| SINE          | Alu           | B1_Mus1 | chr4  | 10848155 10848169 - | 0        | 0        | 0        |
| SINE          | Alu           | B1_Mur2 | chr4  | 10887559 10887573 - | 0        | 0        | 0        |
| SINE          | Alu           | B1_Mus2 | chr4  | 10928865 10928880 + | 0        | 0        | 0        |
| Simple_repeat | Simple_repeat | (GGAA)n | chr4  | 10928882 10928889 + | 0        | 0        | 0        |
| SINE          | Alu           | B1_Mm   | chr4  | 10932102 10932116 + | 0        | 0        | 0        |
| SINE          | Alu           | B1_Mm   | chr4  | 10934438 10934453 - | 0        | 0        | 0        |
| SINE          | Alu           | B1_Mm   | chr4  | 10963966 10963980 - | 0        | 0        | 0        |
| SINE          | Alu           | B1_Mus1 | chr11 | 42710611 42710766 - | 0        | 0        | 0        |
| SINE          | Alu           | B1_Mus2 | chr4  | 11138382 11138396 + | 0.332194 | 0        | 0        |
| Simple_repeat | Simple_repeat | (A)n    | chr4  | 11138396 11138399 + | 0.332194 | 0        | 0        |
| LTR           | MaLR          | MTA_Mm  | chr11 | 42881138 42881530 + | 0        | 0        | 0        |
| SINE          | Alu           | B1_Mm   | chr4  | 11199244 11199258 - | 0        | 0        | 0        |
| Simple_repeat | Simple_repeat | (A)n    | chr11 | 42941225 42941291 + | 0.332194 | 0        | 0        |
| Simple_repeat | Simple_repeat | (A)n    | chr4  | 11296611 11296616 + | 0        | 0        | 0        |
| SINE          | Alu           | B1_Mm   | chr4  | 11310856 11310871 - | 0        | 0        | 0        |
| SINE          | Alu           | B1_Mus2 | chr4  | 11459379 11459393 + | 0        | 0        | 0        |
| Simple_repeat | Simple_repeat | (GAAA)n | chr4  | 11459394 11459400 + | 0        | 0        | 0.342623 |
| SINE          | Alu           | B1_Mus2 | chr4  | 11467069 11467083 - | 0        | 0        | 0        |
| Simple_repeat | Simple_repeat | (A)n    | chr4  | 11471636 11471639 + | 0        | 0        | 0        |
| SINE          | Alu           | B1_Mus1 | chr4  | 11572746 11572761 - | 0        | 0        | 0        |
| SINE          | Alu           | B1_Mus2 | chr4  | 11585993 11586007 - | 0        | 0        | 0        |
| Simple_repeat | Simple_repeat | (A)n    | chr11 | 43247141 43247176 + | 0        | 0        | 0.342623 |
| LTR           | MaLR          | MTB     | chr4  | 11622249 11622288 - | 0        | 0        | 0        |
| SINE          | Alu           | B1_Mus1 | chr4  | 11635481 11635496 + | 0        | 0        | 0        |
| Simple_repeat | Simple_repeat | (A)n    | chr4  | 11635496 11635502 + | 0        | 0        | 0        |
| SINE          | Alu           | B1_Mus2 | chr4  | 11651061 11651075 + | 0        | 0        | 0        |
| Simple_repeat | Simple_repeat | (A)n    | chr4  | 11651075 11651078 + | 0        | 0        | 0        |
| SINE          | Alu           | B1_Mur4 | chr4  | 11668220 11668239 - | 0        | 0        | 0        |
| SINE          | Alu           | B1_Mm   | chr4  | 11681757 11681772 + | 0        | 0        | 0        |
| Simple_repeat | Simple_repeat | (A)n    | chr4  | 11681772 11681774 + | 0        | 0        | 0.342623 |
| SINE          | Alu           | B1_Mus1 | chr4  | 11747182 11747194 - | 0        | 0        | 0        |



|                |                |         |       |                     |          |          |          |
|----------------|----------------|---------|-------|---------------------|----------|----------|----------|
| SINE           | B2             | B2_Mm1a | chr4  | 11797335 11797353 - | 0        | 3.53776  | 0.342623 |
| SINE           | Alu            | B1_Mus2 | chr4  | 11811229 11811243 - | 0        | 0        | 0        |
| SINE           | Alu            | B1_Mus2 | chr4  | 11820609 11820623 - | 0        | 0        | 0        |
| Simple_repeat  | Simple_repeat  | (A)n    | chr4  | 11842816 11842819 + | 0        | 0        | 0        |
| SINE           | Alu            | B1_Mur4 | chr4  | 11854638 11854653 + | 0        | 0        | 0        |
| SINE           | Alu            | B1_Mus2 | chr4  | 11858212 11858226 + | 0        | 0        | 0        |
| LINE           | L1             | L1VL4   | chr4  | 11861820 11862301 + | 0        | 0        | 0        |
| SINE           | Alu            | B1_Mus2 | chr4  | 11865739 11865753 - | 0        | 0        | 0        |
| SINE           | B2             | B2_Mm1a | chr4  | 11866664 11866683 - | 0        | 0        | 0        |
| Simple_repeat  | Simple_repeat  | (A)n    | chr4  | 11872163 11872167 + | 0        | 0        | 0        |
| SINE           | Alu            | B1_Mus2 | chr4  | 11917548 11917563 - | 0        | 0        | 0        |
| SINE           | Alu            | B1_Mm   | chr4  | 11931234 11931246 - | 0        | 0        | 0        |
| Simple_repeat  | Simple_repeat  | (A)n    | chr4  | 11942627 11942632 + | 1.84649  | 1.08938  | 2.18859  |
| Simple_repeat  | Simple_repeat  | (GAAA)n | chr4  | 11986925 11986938 + | 0        | 0        | 0        |
| Simple_repeat  | Simple_repeat  | (A)n    | chr4  | 12003052 12003056 + | 0        | 0        | 0        |
| SINE           | B2             | B3      | chr11 | 43652429 43652623 - | 0        | 0        | 0        |
| SINE           | Alu            | B1_Mus2 | chr4  | 12102621 12102635 + | 0        | 0        | 0        |
| Simple_repeat  | Simple_repeat  | (A)n    | chr4  | 12118806 12118811 + | 0        | 0        | 0        |
| SINE           | Alu            | B1_Mus1 | chr4  | 12144484 12144498 + | 0        | 0        | 0        |
| Simple_repeat  | Simple_repeat  | (A)n    | chr4  | 12144498 12144501 + | 0        | 0        | 0        |
| SINE           | Alu            | B1_Mus1 | chr4  | 12150437 12150452 + | 0        | 0        | 0        |
| SINE           | Alu            | B1_Mus1 | chr4  | 12189735 12189750 + | 0        | 0        | 0        |
| SINE           | Alu            | B1_Mus1 | chr4  | 12215899 12215914 + | 0        | 0        | 0        |
| SINE           | Alu            | B1_Mur3 | chr4  | 12249746 12249761 - | 0        | 0        | 0        |
| Simple_repeat  | Simple_repeat  | (A)n    | chr4  | 12253641 12253644 + | 1.18211  | 0.761137 | 1.84597  |
| Low_complexity | Low_complexity | GA-rich | chr4  | 12266564 12266569 + | 0.664388 | 0        | 0.342623 |
| Simple_repeat  | Simple_repeat  | (A)n    | chr4  | 12276018 12276020 + | 0        | 0        | 0        |
| SINE           | Alu            | B1_Mus2 | chr4  | 12295562 12295576 + | 0        | 0        | 0        |
| SINE           | Alu            | B1_Mus1 | chr4  | 12353292 12353306 + | 0        | 0        | 0        |
| Low_complexity | Low_complexity | A-rich  | chr4  | 12353306 12353310 + | 0        | 0        | 0        |
| SINE           | Alu            | B1_Mus1 | chr4  | 12380741 12380755 - | 0        | 0        | 0        |
| LTR            | MaLR           | MTB     | chr4  | 12401446 12401485 - | 0        | 0        | 0.342623 |
| LTR            | MaLR           | MTA_Mm  | chr4  | 12417267 12417307 + | 0        | 0        | 0        |
| SINE           | Alu            | B1_Mm   | chr4  | 12425627 12425642 - | 0        | 0        | 0.615324 |
| SINE           | Alu            | B1_Mm   | chr4  | 12441739 12441753 - | 0        | 0        | 0        |
| SINE           | Alu            | B1_Mm   | chr4  | 12441788 12441803 - | 0        | 0        | 0        |
| SINE           | Alu            | B1_Mus2 | chr4  | 12454139 12454153 + | 0        | 0        | 0        |
| Simple_repeat  | Simple_repeat  | (GAA)n  | chr4  | 12454154 12454160 + | 0        | 0.380568 | 0.342623 |
| SINE           | Alu            | B1_Mus2 | chr4  | 12476037 12476052 + | 0        | 0        | 0        |
| Simple_repeat  | Simple_repeat  | (A)n    | chr4  | 12476052 12476054 + | 0        | 0        | 0        |
| SINE           | Alu            | B1_Mus2 | chr4  | 12562846 12562861 + | 0        | 0        | 0.615324 |
| Simple_repeat  | Simple_repeat  | (A)n    | chr4  | 12562861 12562863 + | 0        | 0        | 0.615324 |
| SINE           | Alu            | B1_Mm   | chr4  | 12567219 12567233 + | 0        | 0        | 0        |
| LTR            | MaLR           | MTC     | chr4  | 12567234 12567271 + | 0        | 0        | 0        |
| SINE           | Alu            | B1_Mus2 | chr4  | 12665441 12665456 + | 0        | 0        | 0        |
| Simple_repeat  | Simple_repeat  | (A)n    | chr4  | 12665456 12665458 + | 0        | 0        | 0.342623 |
| SINE           | Alu            | B1_Mm   | chr4  | 12675283 12675298 + | 0        | 0        | 0        |
| Simple_repeat  | Simple_repeat  | (A)n    | chr4  | 12675298 12675301 + | 0        | 0        | 0        |
| Simple_repeat  | Simple_repeat  | (A)n    | chr11 | 44431278 44431356 + | 11.4927  | 4.9617   | 3.02097  |
| SINE           | Alu            | B1_Mm   | chr4  | 12714791 12714806 - | 0        | 0        | 0        |
| Simple_repeat  | Simple_repeat  | (A)n    | chr4  | 12732805 12732807 + | 0        | 0        | 0        |
| LTR            | MaLR           | MTA_Mm  | chr4  | 12758660 12758699 - | 0        | 0        | 0        |
| LTR            | MaLR           | MTA_Mm  | chr4  | 12860569 12860608 - | 0        | 0        | 0        |
| Simple_repeat  | Simple_repeat  | (A)n    | chr4  | 12865038 12865042 + | 0        | 0        | 0        |
| SINE           | Alu            | B1_Mus2 | chr4  | 12866295 12866310 + | 0        | 0        | 0        |
| Simple_repeat  | Simple_repeat  | (A)n    | chr4  | 12866310 12866312 + | 0        | 0        | 0        |
| Simple_repeat  | Simple_repeat  | (A)n    | chr4  | 12894921 12894923 + | 0        | 0        | 0        |
| SINE           | Alu            | B1_Mus2 | chr4  | 12918458 12918472 + | 0.591053 | 0        | 0.615324 |
| SINE           | Alu            | B1_Mus2 | chr4  | 12922345 12922357 + | 0        | 0        | 0        |
| Simple_repeat  | Simple_repeat  | (A)n    | chr4  | 12922357 12922359 + | 0        | 0        | 0        |
| SINE           | Alu            | B1_Mm   | chr4  | 12922454 12922469 - | 0        | 0        | 0        |
| SINE           | B2             | B2_Mm1t | chr4  | 12947950 12947969 - | 0        | 0        | 0        |
| SINE           | Alu            | B1_Mus2 | chr4  | 12961790 12961805 + | 0        | 0        | 0        |
| Simple_repeat  | Simple_repeat  | (A)n    | chr4  | 12961805 12961808 + | 0        | 0        | 0        |
| Simple_repeat  | Simple_repeat  | (TTTA)n | chr4  | 12998041 12998043 + | 0        | 0        | 0        |
| SINE           | Alu            | B1_Mus1 | chr4  | 13019337 13019350 + | 0        | 0        | 0.342623 |
| Simple_repeat  | Simple_repeat  | (A)n    | chr4  | 13019350 13019353 + | 0        | 0        | 0.342623 |

|                |                |         |       |                     |          |   |          |
|----------------|----------------|---------|-------|---------------------|----------|---|----------|
| SINE           | Alu            | B1_Mm   | chr4  | 13019794 13019807 - | 0        | 0 | 0        |
| Simple_repeat  | Simple_repeat  | (A)n    | chr4  | 13021836 13021839 + | 0        | 0 | 0        |
| SINE           | Alu            | B1_Mus1 | chr4  | 13185256 13185271 - | 0        | 0 | 0.342623 |
| SINE           | B2             | B2_Mm1a | chr4  | 13186228 13186247 - | 0        | 0 | 0        |
| SINE           | Alu            | B1_Mm   | chr4  | 13190312 13190327 + | 0        | 0 | 0        |
| Simple_repeat  | Simple_repeat  | (A)n    | chr4  | 13190327 13190333 + | 0        | 0 | 0        |
| SINE           | Alu            | B1_Mus1 | chr4  | 13203830 13203844 - | 0        | 0 | 0        |
| SINE           | Alu            | B1_Mus2 | chr4  | 13214013 13214027 + | 0        | 0 | 0        |
| Simple_repeat  | Simple_repeat  | (A)n    | chr4  | 13214027 13214030 + | 0        | 0 | 0        |
| Simple_repeat  | Simple_repeat  | (A)n    | chr4  | 13235980 13235983 + | 0        | 0 | 0        |
| SINE           | Alu            | B1_Mus1 | chr4  | 13278284 13278299 + | 0        | 0 | 0        |
| Simple_repeat  | Simple_repeat  | (A)n    | chr4  | 13278299 13278301 + | 0        | 0 | 0        |
| SINE           | Alu            | B1_Mus2 | chr4  | 13282016 13282030 - | 0        | 0 | 0        |
| SINE           | Alu            | B1_Mus2 | chr4  | 13283652 13283667 + | 0        | 0 | 0        |
| LTR            | MaLR           | MTA_Mm  | chr4  | 13310631 13310671 + | 0.332194 | 0 | 0        |
| Simple_repeat  | Simple_repeat  | (A)n    | chr4  | 13315238 13315240 + | 0        | 0 | 0        |
| SINE           | Alu            | B1_Mus2 | chr4  | 13334713 13334728 + | 0        | 0 | 0        |
| SINE           | Alu            | B1_Mus2 | chr4  | 13347823 13347838 - | 0        | 0 | 0        |
| Simple_repeat  | Simple_repeat  | (A)n    | chr4  | 13449506 13449509 + | 0.591053 | 0 | 0        |
| SINE           | Alu            | B1_Mus1 | chr4  | 13475466 13475480 + | 0        | 0 | 0        |
| Simple_repeat  | Simple_repeat  | (A)n    | chr11 | 45778527 45778599 + | 0        | 0 | 0        |
| Simple_repeat  | Simple_repeat  | (A)n    | chr10 | 20892610 20892653 + | 0        | 0 | 0        |
| SINE           | Alu            | B1_Mm   | chr4  | 13518764 13518777 + | 0        | 0 | 0        |
| Simple_repeat  | Simple_repeat  | (A)n    | chr4  | 13518777 13518779 + | 0        | 0 | 0        |
| SINE           | Alu            | B1_Mus2 | chr4  | 13522419 13522433 - | 0        | 0 | 0        |
| SINE           | Alu            | B1_Mus2 | chr4  | 13543471 13543486 + | 0        | 0 | 0        |
| Simple_repeat  | Simple_repeat  | (A)n    | chr4  | 13543486 13543488 + | 0        | 0 | 0        |
| SINE           | Alu            | B1_Mus2 | chr4  | 13566235 13566250 - | 0        | 0 | 0        |
| Simple_repeat  | Simple_repeat  | (A)n    | chr4  | 13568690 13568693 + | 0        | 0 | 0        |
| Simple_repeat  | Simple_repeat  | (A)n    | chr4  | 13575277 13575279 + | 0        | 0 | 0        |
| SINE           | Alu            | B1_Mm   | chr4  | 13583391 13583406 - | 0        | 0 | 0        |
| Simple_repeat  | Simple_repeat  | (TTTA)n | chr4  | 13616149 13616153 + | 0        | 0 | 0        |
| SINE           | Alu            | B1_Mus2 | chr4  | 13644442 13644457 - | 0        | 0 | 0        |
| Simple_repeat  | Simple_repeat  | (A)n    | chr4  | 13645941 13645944 + | 0        | 0 | 0        |
| Simple_repeat  | Simple_repeat  | (A)n    | chr4  | 13681386 13681389 + | 0        | 0 | 0        |
| SINE           | Alu            | B1_Mm   | chr4  | 13714529 13714544 - | 0        | 0 | 0        |
| SINE           | Alu            | B1_Mus2 | chr4  | 13810602 13810617 + | 0        | 0 | 0        |
| Simple_repeat  | Simple_repeat  | (A)n    | chr4  | 13810617 13810620 + | 0        | 0 | 0        |
| SINE           | Alu            | B1_Mm   | chr11 | 46204625 46204770 - | 0        | 0 | 0        |
| Simple_repeat  | Simple_repeat  | (A)n    | chr4  | 13869777 13869783 + | 0        | 0 | 0        |
| SINE           | Alu            | B1_Mus2 | chr4  | 14023774 14023789 - | 0        | 0 | 0        |
| Simple_repeat  | Simple_repeat  | (A)n    | chr4  | 14045550 14045553 + | 0        | 0 | 0        |
| Low_complexity | Low_complexity | AT-rich | chr4  | 14070153 14070156 + | 0        | 0 | 0        |
| SINE           | Alu            | B1_Mus2 | chr4  | 14111045 14111059 - | 0        | 0 | 0        |
| SINE           | Alu            | B1_Mm   | chr4  | 14112007 14112022 + | 0        | 0 | 0        |
| Simple_repeat  | Simple_repeat  | (A)n    | chr4  | 14122455 14122458 + | 0        | 0 | 0        |
| SINE           | B2             | B2_Mm1a | chr4  | 14128252 14128270 + | 0        | 0 | 0        |
| Low_complexity | Low_complexity | GA-rich | chr11 | 46608545 46608701 + | 0        | 0 | 0        |
| Simple_repeat  | Simple_repeat  | (A)n    | chr4  | 14235316 14235318 + | 0        | 0 | 0        |
| SINE           | Alu            | B1_Mus2 | chr11 | 46675490 46675636 - | 0        | 0 | 0        |
| SINE           | Alu            | B1_Mus1 | chr4  | 14289478 14289492 + | 0        | 0 | 0        |
| Low_complexity | Low_complexity | A-rich  | chr4  | 14289492 14289500 + | 0        | 0 | 0        |
| SINE           | Alu            | B1_Mm   | chr4  | 14296447 14296459 - | 0        | 0 | 0        |
| SINE           | B2             | B3A     | chr4  | 14297047 14297066 + | 0        | 0 | 0        |
| Simple_repeat  | Simple_repeat  | (A)n    | chr4  | 14297066 14297069 + | 0        | 0 | 0        |
| SINE           | Alu            | B1_Mus1 | chr4  | 14298369 14298383 - | 0        | 0 | 0        |
| SINE           | Alu            | B1_Mus2 | chr11 | 46714729 46714873 - | 0        | 0 | 0        |
| LTR            | MaLR           | MTA_Mm  | chr4  | 14308738 14308778 + | 0        | 0 | 0        |
| SINE           | Alu            | B1_Mus2 | chr4  | 14351704 14351718 + | 0        | 0 | 0        |
| Simple_repeat  | Simple_repeat  | (A)n    | chr4  | 14351718 14351720 + | 0        | 0 | 0        |
| SINE           | Alu            | B1_Mus1 | chr4  | 14363840 14363855 - | 0        | 0 | 0        |
| SINE           | Alu            | B1_Mm   | chr4  | 14480038 14480053 - | 0        | 0 | 0        |
| SINE           | Alu            | B1_Mm   | chr4  | 14491621 14491635 - | 0        | 0 | 0        |
| SINE           | Alu            | B1_Mus2 | chr4  | 14499704 14499718 + | 0        | 0 | 0        |
| Simple_repeat  | Simple_repeat  | (A)n    | chr4  | 14499718 14499721 + | 0        | 0 | 0        |
| SINE           | B2             | B2_Mm1t | chr4  | 14507140 14507159 - | 0        | 0 | 0        |
| SINE           | Alu            | B1_Mus2 | chr4  | 14515358 14515373 - | 0        | 0 | 0.615324 |

|                |                |         |       |                     |          |          |          |
|----------------|----------------|---------|-------|---------------------|----------|----------|----------|
| LTR            | MaLR           | MTA_Mm  | chr4  | 14519889 14519928 - | 0        | 0        | 0        |
| SINE           | Alu            | B1_Mm   | chr4  | 14557942 14557956 + | 0        | 0        | 0        |
| Simple_repeat  | Simple_repeat  | (A)n    | chr4  | 14557956 14557959 + | 0        | 0        | 0        |
| SINE           | Alu            | B1_Mm   | chr4  | 14559931 14559945 - | 0        | 0        | 0        |
| SINE           | Alu            | B1_Mus2 | chr4  | 14571808 14571823 - | 0        | 0        | 0        |
| SINE           | Alu            | B1_Mm   | chr4  | 14622539 14622554 + | 0        | 0        | 0        |
| SINE           | Alu            | B1_Mus2 | chr4  | 14623026 14623041 - | 0        | 0        | 0        |
| SINE           | Alu            | B1_Mm   | chr4  | 14696813 14696828 - | 0        | 0        | 0        |
| SINE           | Alu            | B1_Mm   | chr4  | 14702899 14702913 - | 0.591053 | 0        | 0        |
| Simple_repeat  | Simple_repeat  | (A)n    | chr4  | 14719106 14719108 + | 0        | 0        | 0        |
| SINE           | Alu            | B1_Mus2 | chr4  | 14743778 14743792 + | 0        | 0        | 0        |
| Simple_repeat  | Simple_repeat  | (A)n    | chr4  | 14743792 14743794 + | 0        | 0        | 0        |
| SINE           | Alu            | B1_Mus1 | chr4  | 14744297 14744310 + | 0        | 0        | 0        |
| Simple_repeat  | Simple_repeat  | (A)n    | chr4  | 14744310 14744313 + | 0        | 0        | 0        |
| SINE           | Alu            | B1_Mus2 | chr4  | 14796433 14796447 - | 2.94048  | 0.708814 | 1.55647  |
| SINE           | Alu            | B1_Mus2 | chr4  | 14800258 14800273 - | 0        | 0        | 0        |
| SINE           | Alu            | B1_Mus2 | chr4  | 14804683 14804697 - | 0        | 0        | 0        |
| SINE           | Alu            | B1_Mus2 | chr4  | 14854172 14854187 - | 0        | 0        | 0        |
| Simple_repeat  | Simple_repeat  | (A)n    | chr4  | 14887935 14887939 + | 0        | 0        | 0.342623 |
| SINE           | Alu            | B1_Mus1 | chr4  | 14908048 14908058 - | 0        | 0        | 0        |
| SINE           | Alu            | B1_Mus1 | chr4  | 14911661 14911674 + | 0        | 0        | 0        |
| Simple_repeat  | Simple_repeat  | (A)n    | chr4  | 14911674 14911677 + | 0        | 0.380568 | 0        |
| SINE           | Alu            | B1_Mus1 | chr4  | 14933185 14933198 + | 0        | 0        | 0        |
| Simple_repeat  | Simple_repeat  | (A)n    | chr4  | 14933198 14933201 + | 0        | 0        | 0.342623 |
| SINE           | Alu            | B1_Mus2 | chr4  | 14965126 14965141 + | 0        | 0        | 0        |
| Low_complexity | Low_complexity | A-rich  | chr4  | 14965141 14965147 + | 0        | 0        | 0        |
| SINE           | Alu            | B1_Mus1 | chr4  | 15026595 15026608 + | 0        | 0        | 0.342623 |
| SINE           | B2             | B2_Mm1a | chr4  | 15033196 15033215 - | 0        | 0        | 0        |
| SINE           | Alu            | B1_Mus1 | chr4  | 15169781 15169795 - | 0        | 0        | 0        |
| SINE           | Alu            | B1_Mm   | chr4  | 15254341 15254356 - | 0        | 0        | 0        |
| LTR            | MaLR           | MTB     | chr4  | 15258388 15258427 + | 0        | 0        | 0        |
| LINE           | L1             | L1Md_F2 | chr11 | 48012487 48017719 + | 0        | 0        | 0        |
| Simple_repeat  | Simple_repeat  | (A)n    | chr4  | 15409431 15409434 + | 0        | 0        | 0        |
| LTR            | ERV_L          | MLT2D   | chr4  | 15409434 15409464 + | 0        | 0        | 0        |
| SINE           | Alu            | B1_Mus2 | chr4  | 15429603 15429618 + | 0        | 0        | 0        |
| Simple_repeat  | Simple_repeat  | (A)n    | chr4  | 15429618 15429620 + | 0        | 0        | 0        |
| SINE           | Alu            | B1_Mus2 | chr4  | 15514013 15514028 - | 0        | 0        | 0        |
| LTR            | ERV_L          | RMER15  | chr4  | 15518379 15518412 - | 0        | 0        | 0        |
| SINE           | Alu            | B1_Mus1 | chr4  | 15518413 15518428 - | 0        | 0        | 0        |
| Simple_repeat  | Simple_repeat  | (TTTA)n | chr4  | 15521076 15521079 + | 0        | 0.708814 | 0        |
| SINE           | Alu            | B1_Mus1 | chr4  | 15544074 15544088 + | 0        | 0        | 0        |
| Simple_repeat  | Simple_repeat  | (A)n    | chr4  | 15544088 15544091 + | 0        | 0        | 0        |
| SINE           | Alu            | B1_Mm   | chr4  | 15551334 15551349 + | 0        | 0        | 0        |
| Simple_repeat  | Simple_repeat  | (A)n    | chr4  | 15551349 15551352 + | 0.332194 | 0        | 0        |
| SINE           | Alu            | B1_Mus2 | chr4  | 15558705 15558719 - | 0        | 0        | 0        |
| Simple_repeat  | Simple_repeat  | (A)n    | chr5  | 3118537 3118593 +   | 0        | 0        | 0        |
| LINE           | L1             | L1Md_A  | chr5  | 3175316 3180450 -   | 0        | 0        | 0        |
| SINE           | Alu            | B1_Mus2 | chr5  | 3538007 3538156 -   | 0        | 0        | 0        |
| LTR            | MaLR           | MTA_Mm  | chr5  | 3650172 3650566 -   | 0        | 0        | 0.342623 |
| LTR            | MaLR           | MTA_Mm  | chr5  | 3918469 3918847 -   | 0        | 0        | 0        |
| SINE           | Alu            | B1_Mus2 | chr11 | 48465741 48465887 + | 0        | 0        | 1.23065  |
| SINE           | Alu            | B1_Mus2 | chr5  | 5500825 5500969 -   | 0.591053 | 0        | 0        |
| LTR            | MaLR           | MTA_Mm  | chr5  | 5903165 5903558 +   | 0        | 0        | 0        |
| LTR            | MaLR           | MTA_Mm  | chr5  | 5904644 5905037 +   | 0        | 0        | 0        |
| SINE           | B4             | B4A     | chr5  | 6177374 6177638 -   | 0.591053 | 0        | 0        |
| SINE           | Alu            | B1_Mus2 | chr5  | 6571122 6571268 -   | 0.332194 | 0.380568 | 0        |
| SINE           | Alu            | B1_Mus2 | chr11 | 48600270 48600415 + | 0        | 0        | 0        |
| Simple_repeat  | Simple_repeat  | (A)n    | chr11 | 48600416 48600442 + | 0        | 0        | 0        |
| Simple_repeat  | Simple_repeat  | (A)n    | chr11 | 48612907 48612942 + | 0        | 0        | 0        |
| LINE           | L1             | Lx8     | chr5  | 7400952 7405667 -   | 0        | 0        | 0        |
| Simple_repeat  | Simple_repeat  | (TTTA)n | chr5  | 7495409 7495444 +   | 0        | 0        | 0        |
| SINE           | Alu            | B1_Mm   | chr5  | 7549707 7549853 -   | 0        | 0        | 0        |
| Simple_repeat  | Simple_repeat  | (A)n    | chr5  | 7584265 7584307 +   | 0        | 0        | 0        |
| Simple_repeat  | Simple_repeat  | (A)n    | chr5  | 7845535 7845614 +   | 0        | 0        | 0        |
| SINE           | Alu            | B1_Mus1 | chr5  | 8794566 8794686 +   | 0        | 0        | 0        |
| Simple_repeat  | Simple_repeat  | (A)n    | chr5  | 8794687 8794714 +   | 0        | 0        | 0        |
| Low_complexity | Low_complexity | A-rich  | chr5  | 9242552 9242580 +   | 0        | 0        | 0        |

|                |                |         |       |                     |          |          |          |
|----------------|----------------|---------|-------|---------------------|----------|----------|----------|
| SINE           | Alu            | B1_Mm   | chr5  | 10702482 10702630 + | 0        | 0        | 0        |
| Simple_repeat  | Simple_repeat  | (A)n    | chr5  | 10702631 10702666 + | 0        | 0        | 0        |
| Simple_repeat  | Simple_repeat  | (A)n    | chr5  | 11177436 11177465 + | 0        | 0        | 0        |
| SINE           | B2             | B2_Mm2  | chr10 | 21251148 21251337 - | 0        | 0        | 0        |
| Simple_repeat  | Simple_repeat  | (A)n    | chr5  | 11995027 11995059 + | 0        | 0        | 0        |
| Simple_repeat  | Simple_repeat  | (A)n    | chr5  | 12358935 12358968 + | 0        | 0        | 0        |
| LTR            | MaLR           | MTA_Mm  | chr5  | 12800522 12800913 + | 0        | 0        | 0        |
| LTR            | MaLR           | MTA_Mm  | chr5  | 12802009 12802424 + | 0        | 0        | 0        |
| SINE           | Alu            | B1_Mus1 | chr5  | 13088007 13088148 + | 0        | 0        | 0        |
| Simple_repeat  | Simple_repeat  | (A)n    | chr5  | 13088149 13088187 + | 0        | 0        | 0        |
| LTR            | MaLR           | MTA_Mm  | chr5  | 13890440 13890833 - | 0        | 0        | 0        |
| LTR            | MaLR           | MTA_Mm  | chr5  | 14443586 14443980 - | 0        | 0        | 0        |
| Low_complexity | Low_complexity | A-rich  | chr5  | 14915889 14915981 + | 0        | 0        | 0        |
| Simple_repeat  | Simple_repeat  | (A)n    | chr5  | 15252668 15252706 + | 0        | 0.380568 | 0        |
| SINE           | Alu            | B1_Mus2 | chr5  | 15897110 15897256 + | 0        | 0        | 0        |
| Simple_repeat  | Simple_repeat  | (A)n    | chr5  | 15897257 15897324 + | 0        | 0        | 0        |
| Low_complexity | Low_complexity | A-rich  | chr5  | 15965484 15965549 + | 0        | 0        | 0        |
| Simple_repeat  | Simple_repeat  | (A)n    | chr5  | 16186837 16186881 + | 0        | 0        | 0        |
| LINE           | L1             | L1Md_T  | chr5  | 16538848 16545477 - | 0        | 0        | 0        |
| Simple_repeat  | Simple_repeat  | (A)n    | chr5  | 16670882 16670932 + | 0        | 0        | 0        |
| LINE           | L1             | L1Md_T  | chr5  | 16744089 16753072 - | 0        | 0        | 0        |
| SINE           | Alu            | B1_Mus1 | chr5  | 16806219 16806369 + | 0        | 0        | 0        |
| Simple_repeat  | Simple_repeat  | (A)n    | chr5  | 16806370 16806391 + | 0        | 0        | 0        |
| SINE           | Alu            | B1_Mus1 | chr5  | 16975257 16975403 + | 0        | 0        | 0        |
| LTR            | MaLR           | MTA_Mm  | chr5  | 18546832 18547226 + | 0        | 0        | 0        |
| SINE           | Alu            | B1_Mm   | chr5  | 20483029 20483175 + | 0        | 0        | 0        |
| Simple_repeat  | Simple_repeat  | (A)n    | chr5  | 20483176 20483215 + | 0        | 0        | 0        |
| SINE           | B2             | B2_Mm2  | chr5  | 20487001 20487189 + | 0        | 0        | 0        |
| SINE           | B2             | B2_Mm1a | chr5  | 20578171 20578359 - | 0        | 0        | 0        |
| Simple_repeat  | Simple_repeat  | (A)n    | chr5  | 22081438 22081467 + | 0        | 0        | 0        |
| SINE           | Alu            | B1_Mus2 | chr5  | 22120974 22121122 + | 0        | 0        | 0.615324 |
| Simple_repeat  | Simple_repeat  | (A)n    | chr5  | 22121123 22121149 + | 0        | 0        | 0.615324 |
| Simple_repeat  | Simple_repeat  | (A)n    | chr5  | 22177576 22177613 + | 0        | 0.708814 | 0        |
| Simple_repeat  | Simple_repeat  | (A)n    | chr5  | 22237107 22237148 + | 0        | 0        | 0.342623 |
| Simple_repeat  | Simple_repeat  | (A)n    | chr5  | 22795153 22795198 + | 0        | 0        | 0        |
| SINE           | Alu            | B1_Mus1 | chr5  | 23230505 23230645 - | 0        | 0        | 0        |
| Simple_repeat  | Simple_repeat  | (A)n    | chr5  | 23805549 23805587 + | 0        | 0        | 0        |
| SINE           | B2             | B2_Mm2  | chr5  | 23815082 23815270 + | 0        | 0        | 0.342623 |
| SINE           | Alu            | B1_Mus2 | chr5  | 24174715 24174860 + | 0        | 0        | 0        |
| Simple_repeat  | Simple_repeat  | (A)n    | chr5  | 24174861 24174884 + | 0        | 0        | 0        |
| LTR            | MaLR           | MTA_Mm  | chr5  | 24665602 24665996 + | 0        | 0        | 0        |
| SINE           | Alu            | B1_Mus1 | chr11 | 50063738 50063884 - | 0        | 0        | 0        |
| SINE           | Alu            | B1_Mus2 | chr5  | 24774817 24774957 + | 0.591053 | 0        | 0.615324 |
| Simple_repeat  | Simple_repeat  | (A)n    | chr5  | 24774958 24774982 + | 0.591053 | 0        | 0.615324 |
| SINE           | Alu            | B1_Mm   | chr5  | 25037318 25037463 - | 0        | 0        | 0        |
| SINE           | Alu            | B1_Mm   | chr5  | 25167090 25167235 - | 0        | 0        | 0        |
| SINE           | Alu            | B1_Mur3 | chr11 | 50157166 50157321 + | 0        | 0        | 0        |
| Simple_repeat  | Simple_repeat  | (A)n    | chr11 | 50157322 50157347 + | 0        | 0        | 0        |
| Simple_repeat  | Simple_repeat  | (A)n    | chr5  | 27123309 27123354 + | 0        | 0        | 0        |
| SINE           | B2             | B2_Mm1t | chr10 | 21433994 21434186 - | 0        | 0        | 0        |
| LTR            | MaLR           | MTA_Mm  | chr5  | 29280719 29281114 - | 0        | 0        | 0        |
| Simple_repeat  | Simple_repeat  | (A)n    | chr5  | 29724076 29724120 + | 0        | 0        | 0        |
| SINE           | Alu            | PB1D10  | chr5  | 29795441 29795551 - | 0        | 0        | 0        |
| SINE           | Alu            | B1_Mm   | chr5  | 29850258 29850404 - | 0        | 0        | 0        |
| SINE           | Alu            | B1_Mm   | chr5  | 30149851 30149997 - | 0        | 0        | 0        |
| SINE           | Alu            | B1_Mur2 | chr5  | 30192346 30192496 - | 0        | 0        | 0        |
| Simple_repeat  | Simple_repeat  | (A)n    | chr5  | 30207683 30207717 + | 0        | 0        | 0        |
| Low_complexity | Low_complexity | A-rich  | chr5  | 30270786 30270872 + | 0        | 0        | 0        |
| SINE           | Alu            | B1_Mus1 | chr5  | 31012576 31012714 + | 0.332194 | 0        | 0        |
| Simple_repeat  | Simple_repeat  | (A)n    | chr5  | 31012715 31012755 + | 0.332194 | 0        | 0        |
| SINE           | Alu            | B1_Mur1 | chr5  | 31301749 31301890 + | 0        | 0        | 0        |
| Simple_repeat  | Simple_repeat  | (A)n    | chr5  | 31301891 31301916 + | 0        | 0        | 0        |
| SINE           | Alu            | B1_Mm   | chr5  | 31381858 31382004 + | 0        | 0        | 0        |
| Simple_repeat  | Simple_repeat  | (A)n    | chr5  | 31382005 31382036 + | 0        | 0        | 0        |
| SINE           | Alu            | B1_Mm   | chr5  | 31403907 31404056 + | 0        | 0        | 0        |
| Simple_repeat  | Simple_repeat  | (A)n    | chr5  | 31404057 31404081 + | 0        | 0        | 0        |
| SINE           | Alu            | B1_Mus1 | chr5  | 31408801 31408948 + | 0        | 0        | 0        |

|               |               |         |       |                     |         |          |          |
|---------------|---------------|---------|-------|---------------------|---------|----------|----------|
| Simple_repeat | Simple_repeat | (A)n    | chr5  | 31408949 31408990 + | 0       | 0        | 0        |
| SINE          | Alu           | B1_Mm   | chr5  | 31535153 31535299 + | 0       | 0        | 0        |
| Simple_repeat | Simple_repeat | (A)n    | chr5  | 32723704 32723740 + | 0       | 0.380568 | 0        |
| SINE          | Alu           | B1_Mus2 | chr5  | 33129085 33129231 + | 0       | 0        | 0        |
| Simple_repeat | Simple_repeat | (A)n    | chr5  | 33129232 33129263 + | 0       | 0        | 0        |
| SINE          | Alu           | B1_Mm   | chr5  | 33201993 33202138 + | 0       | 0        | 0        |
| SINE          | Alu           | B1_Mus2 | chr5  | 33658233 33658379 - | 0       | 0        | 0        |
| SINE          | B2            | B3A     | chr5  | 33676978 33677173 + | 0       | 0        | 0        |
| Simple_repeat | Simple_repeat | (A)n    | chr5  | 33677174 33677195 + | 0       | 0.380568 | 0        |
| SINE          | Alu           | B1_Mm   | chr5  | 34060226 34060372 + | 0       | 0        | 0.615324 |
| Simple_repeat | Simple_repeat | (A)n    | chr5  | 34060373 34060401 + | 0       | 0.761137 | 0.615324 |
| Simple_repeat | Simple_repeat | (A)n    | chr5  | 34319091 34319128 + | 0       | 0        | 0        |
| SINE          | B4            | ID_B1   | chr5  | 35431991 35432214 - | 0       | 0        | 0        |
| Simple_repeat | Simple_repeat | (A)n    | chr5  | 35641675 35641715 + | 0       | 0        | 0        |
| LTR           | MaLR          | MTA_Mm  | chr5  | 36357696 36358089 + | 0       | 0        | 0        |
| SINE          | Alu           | B1_Mm   | chr5  | 37155726 37155872 + | 0       | 0        | 0        |
| Simple_repeat | Simple_repeat | (A)n    | chr5  | 37155873 37155915 + | 0       | 0        | 0        |
| SINE          | Alu           | B1_Mm   | chr5  | 37437229 37437375 - | 0       | 0        | 0        |
| Simple_repeat | Simple_repeat | (A)n    | chr5  | 38108750 38108788 + | 0       | 0        | 0        |
| SINE          | Alu           | B1_Mm   | chr5  | 38301451 38301599 + | 0       | 0        | 0        |
| Simple_repeat | Simple_repeat | (A)n    | chr5  | 38301600 38301631 + | 0       | 0        | 0        |
| Simple_repeat | Simple_repeat | (A)n    | chr5  | 39024086 39024113 + | 0       | 0        | 0        |
| LTR           | MaLR          | MTA_Mm  | chr5  | 39826534 39826929 + | 0       | 0        | 0        |
| Simple_repeat | Simple_repeat | (A)n    | chr5  | 40743604 40743632 + | 0       | 0        | 0        |
| LTR           | MaLR          | MTA_Mm  | chr5  | 40973251 40973649 - | 0       | 0        | 0        |
| LTR           | MaLR          | MTA_Mm  | chr5  | 40974740 40975138 - | 0       | 0        | 0        |
| LTR           | MaLR          | MTA_Mm  | chr5  | 41330001 41330395 + | 0       | 0        | 0        |
| Simple_repeat | Simple_repeat | (A)n    | chr5  | 41336037 41336071 + | 0       | 0        | 0        |
| LTR           | MaLR          | MTB     | chr5  | 41403951 41404344 - | 0       | 0        | 0        |
| SINE          | Alu           | B1_Mm   | chr5  | 42297793 42297939 + | 0       | 0        | 0        |
| Simple_repeat | Simple_repeat | (A)n    | chr5  | 42297940 42297980 + | 0       | 0        | 0.342623 |
| LINE          | L1            | L1Md_T  | chr5  | 42391767 42397052 - | 0       | 0        | 0        |
| LTR           | MaLR          | MTB     | chr5  | 43182415 43182787 - | 0       | 0        | 0        |
| LTR           | ERVK          | RMER19B | chr5  | 44049531 44050478 + | 0       | 0        | 0        |
| SINE          | Alu           | B1_Mm   | chr11 | 51477816 51477938 - | 0       | 0        | 0        |
| SINE          | Alu           | B1_Mus1 | chr5  | 44305968 44306114 - | 0       | 0        | 0        |
| Simple_repeat | Simple_repeat | (A)n    | chr5  | 44560452 44560490 + | 0       | 0        | 0        |
| LTR           | MaLR          | MTA_Mm  | chr5  | 45499344 45499738 - | 0       | 0        | 0        |
| SINE          | B2            | B2_Mm1t | chr5  | 45719065 45719255 - | 0       | 0        | 0        |
| Simple_repeat | Simple_repeat | (A)n    | chr5  | 45728257 45728310 + | 0       | 0        | 0        |
| SINE          | Alu           | B1_Mm   | chr5  | 46296351 46296496 + | 0       | 0        | 0        |
| Simple_repeat | Simple_repeat | (A)n    | chr5  | 46296497 46296573 + | 0       | 0        | 0        |
| scRNA         | scRNA         | 4.5SRNA | chr5  | 46498263 46498356 - | 0       | 0        | 0        |
| Simple_repeat | Simple_repeat | (A)n    | chr5  | 46726531 46726560 + | 0       | 0        | 0        |
| SINE          | Alu           | B1_Mm   | chr5  | 47050350 47050495 + | 0       | 0        | 1.10507  |
| Simple_repeat | Simple_repeat | (A)n    | chr5  | 47050496 47050521 + | 0       | 0        | 1.10507  |
| SINE          | Alu           | B1_Mm   | chr11 | 51614093 51614238 + | 0       | 0        | 0        |
| Simple_repeat | Simple_repeat | (A)n    | chr11 | 51614239 51614264 + | 0       | 0        | 0        |
| Simple_repeat | Simple_repeat | (A)n    | chr5  | 48212764 48212792 + | 0       | 0        | 0        |
| Simple_repeat | Simple_repeat | (A)n    | chr5  | 49726187 49726226 + | 0       | 0        | 0        |
| Simple_repeat | Simple_repeat | (A)n    | chr5  | 50065257 50065304 + | 0       | 0        | 0        |
| LINE          | L1            | L1Md_F2 | chr5  | 50466858 50471342 + | 0       | 0.708814 | 0        |
| Simple_repeat | Simple_repeat | (A)n    | chr5  | 50548444 50548473 + | 0       | 0        | 0        |
| Simple_repeat | Simple_repeat | (A)n    | chr5  | 50571143 50571185 + | 0       | 0        | 0        |
| SINE          | Alu           | B1_Mus1 | chr5  | 50583500 50583646 + | 0       | 0        | 0        |
| Simple_repeat | Simple_repeat | (A)n    | chr5  | 50583647 50583673 + | 0       | 0        | 0        |
| Simple_repeat | Simple_repeat | (A)n    | chr5  | 51064755 51064791 + | 0       | 0        | 0        |
| LTR           | MaLR          | MTA_Mm  | chr5  | 52041748 52042143 - | 1.18211 | 0        | 0.957947 |
| Simple_repeat | Simple_repeat | (A)n    | chr5  | 52263344 52263380 + | 0       | 0        | 0        |
| LTR           | MaLR          | MTA_Mm  | chr5  | 52333307 52333703 + | 0       | 0        | 0        |
| SINE          | Alu           | B1_Mus1 | chr5  | 53109935 53110070 - | 0       | 0        | 0        |
| SINE          | Alu           | B1_Mus1 | chr5  | 53473877 53474024 - | 0       | 0        | 0        |
| SINE          | Alu           | B1_Mm   | chr5  | 53879646 53879790 + | 0       | 0        | 0        |
| Simple_repeat | Simple_repeat | (A)n    | chr5  | 53879791 53879814 + | 0       | 0        | 0        |
| SINE          | Alu           | B1_Mus1 | chr5  | 54071430 54071567 - | 0       | 0        | 0        |
| Simple_repeat | Simple_repeat | (A)n    | chr5  | 55487170 55487224 + | 0       | 0        | 0        |
| SINE          | Alu           | B1_Mus2 | chr5  | 55647202 55647344 + | 0       | 0        | 0        |

|                |                |         |       |                     |   |          |          |
|----------------|----------------|---------|-------|---------------------|---|----------|----------|
| SINE           | Alu            | B1_Mus1 | chr5  | 55907400 55907547 + | 0 | 0        | 0        |
| SINE           | Alu            | B1_Mus2 | chr5  | 56098912 56099057 + | 0 | 0        | 0        |
| Simple_repeat  | Simple_repeat  | (A)n    | chr5  | 56146741 56146790 + | 0 | 0        | 0        |
| Simple_repeat  | Simple_repeat  | (A)n    | chr5  | 56200637 56200666 + | 0 | 0        | 0        |
| LINE           | L1             | L1Md_T  | chr5  | 56228525 56235445 - | 0 | 0        | 0        |
| SINE           | Alu            | B1_Mm   | chr5  | 56252636 56252750 - | 0 | 0        | 0        |
| SINE           | Alu            | B1_Mus2 | chr5  | 56256680 56256825 + | 0 | 0        | 0        |
| Simple_repeat  | Simple_repeat  | (A)n    | chr5  | 56256826 56256847 + | 0 | 0        | 0        |
| Simple_repeat  | Simple_repeat  | (A)n    | chr5  | 56622432 56622468 + | 0 | 0        | 0        |
| SINE           | Alu            | B1_Mus2 | chr5  | 56749775 56749901 + | 0 | 0        | 0        |
| Simple_repeat  | Simple_repeat  | (A)n    | chr5  | 56749902 56749930 + | 0 | 0        | 0        |
| SINE           | Alu            | B1_Mur4 | chr5  | 56879996 56880145 - | 0 | 0        | 0        |
| SINE           | Alu            | B1_Mm   | chr5  | 57419783 57419934 + | 0 | 0        | 0        |
| Simple_repeat  | Simple_repeat  | (A)n    | chr5  | 57419935 57419969 + | 0 | 0        | 0        |
| LINE           | L1             | L1Md_F2 | chr5  | 57636519 57641682 + | 0 | 0        | 0        |
| Simple_repeat  | Simple_repeat  | (A)n    | chr11 | 52247261 52247300 + | 0 | 0        | 0        |
| SINE           | Alu            | B1_Mus1 | chr11 | 52263217 52263353 - | 0 | 0        | 0        |
| SINE           | Alu            | B1_Mm   | chr5  | 59075751 59075897 - | 0 | 0        | 0        |
| LINE           | L1             | L1_Mus2 | chr5  | 59478292 59482906 - | 0 | 0        | 0        |
| Simple_repeat  | Simple_repeat  | (A)n    | chr5  | 59815412 59815453 + | 0 | 0        | 0        |
| SINE           | Alu            | B1_Mus2 | chr5  | 60222719 60222866 + | 0 | 0        | 0        |
| Simple_repeat  | Simple_repeat  | (A)n    | chr5  | 60222867 60222891 + | 0 | 0        | 0        |
| Simple_repeat  | Simple_repeat  | (A)n    | chr5  | 60339531 60339580 + | 0 | 0        | 0        |
| Low_complexity | Low_complexity | A-rich  | chr5  | 60799577 60799644 + | 0 | 0        | 0        |
| LINE           | L1             | L1Md_T  | chr5  | 60941757 60948495 - | 0 | 0        | 0        |
| LTR            | MaLR           | MTA_Mm  | chr5  | 61032907 61033302 + | 0 | 0        | 0        |
| LTR            | MaLR           | MTA_Mm  | chr5  | 61073357 61073752 + | 0 | 0        | 0        |
| SINE           | Alu            | B1_Mm   | chr5  | 61154611 61154737 - | 0 | 0        | 0        |
| SINE           | Alu            | B1_Mus1 | chr5  | 62370353 62370497 - | 0 | 0        | 0        |
| Simple_repeat  | Simple_repeat  | (A)n    | chr5  | 62641838 62641878 + | 0 | 0        | 0        |
| Simple_repeat  | Simple_repeat  | (A)n    | chr5  | 62661189 62661232 + | 0 | 0        | 0        |
| LTR            | MaLR           | MTA_Mm  | chr5  | 62858265 62858614 - | 0 | 0        | 0        |
| Simple_repeat  | Simple_repeat  | (A)n    | chr5  | 63529151 63529192 + | 0 | 0        | 0        |
| Simple_repeat  | Simple_repeat  | (A)n    | chr5  | 63949103 63949129 + | 0 | 0        | 0        |
| Simple_repeat  | Simple_repeat  | (A)n    | chr5  | 64035374 64035404 + | 0 | 0        | 0        |
| SINE           | Alu            | B1_Mus1 | chr5  | 64363734 64363881 + | 0 | 0        | 0        |
| SINE           | Alu            | B1_Mus2 | chr5  | 65093923 65094048 - | 0 | 0        | 0        |
| SINE           | Alu            | B1_Mus2 | chr5  | 65325893 65326039 + | 0 | 0        | 0        |
| SINE           | Alu            | B1_Mus1 | chr5  | 66091919 66092066 - | 0 | 0        | 0        |
| Simple_repeat  | Simple_repeat  | (TTTA)n | chr5  | 66110272 66110295 + | 0 | 0        | 0        |
| SINE           | Alu            | B1_Mus2 | chr5  | 66288482 66288627 + | 0 | 0        | 0        |
| Simple_repeat  | Simple_repeat  | (A)n    | chr5  | 66288628 66288654 + | 0 | 0        | 0        |
| SINE           | Alu            | B1_Mus2 | chr5  | 66345681 66345839 + | 0 | 0        | 0        |
| Simple_repeat  | Simple_repeat  | (A)n    | chr5  | 66345840 66345865 + | 0 | 0        | 0        |
| Simple_repeat  | Simple_repeat  | (A)n    | chr5  | 66348009 66348044 + | 0 | 0        | 0        |
| LTR            | MaLR           | MTB     | chr5  | 67518841 67519242 + | 0 | 0        | 0        |
| SINE           | Alu            | B1_Mus2 | chr11 | 53120850 53120994 - | 0 | 0        | 0        |
| SINE           | B2             | B2_Mm1t | chr11 | 53126638 53126823 - | 0 | 0        | 0        |
| Simple_repeat  | Simple_repeat  | (A)n    | chr5  | 68394262 68394322 + | 0 | 0        | 0        |
| SINE           | Alu            | B1_Mus1 | chr11 | 53132342 53132487 - | 0 | 0        | 0        |
| LTR            | MaLR           | MTA_Mm  | chr5  | 68617578 68617972 + | 0 | 0        | 0        |
| LTR            | MaLR           | MTA_Mm  | chr5  | 69043634 69044028 - | 0 | 0        | 0        |
| LINE           | L1             | L1_Mus3 | chr5  | 70478162 70484368 - | 0 | 0        | 0        |
| LINE           | L1             | L1Md_F2 | chr5  | 70906915 70912884 - | 0 | 0        | 0        |
| LTR            | MaLR           | MTA_Mm  | chr5  | 70961348 70961743 + | 0 | 0        | 0        |
| SINE           | Alu            | B1_Mus1 | chr11 | 53240693 53240847 - | 0 | 0        | 0        |
| SINE           | Alu            | B1_Mus1 | chr5  | 71111707 71111854 - | 0 | 0        | 0        |
| Simple_repeat  | Simple_repeat  | (A)n    | chr5  | 71954550 71954584 + | 0 | 0        | 0        |
| Simple_repeat  | Simple_repeat  | (GAA)n  | chr5  | 73270814 73270864 + | 0 | 0.380568 | 0.342623 |
| SINE           | Alu            | B1_Mus2 | chr5  | 73296706 73296840 - | 0 | 0        | 0        |
| SINE           | Alu            | B1_Mm   | chr5  | 73757110 73757255 + | 0 | 0        | 0        |
| Simple_repeat  | Simple_repeat  | (A)n    | chr5  | 73757256 73757297 + | 0 | 0        | 0        |
| LTR            | MaLR           | MTA_Mm  | chr5  | 73777254 73777648 - | 0 | 0        | 0        |
| SINE           | Alu            | B1_Mm   | chr5  | 74279284 74279430 + | 0 | 0        | 0        |
| LTR            | MaLR           | MTB     | chr5  | 74351973 74352371 + | 0 | 0        | 0.342623 |
| Simple_repeat  | Simple_repeat  | (A)n    | chr5  | 74468844 74468866 + | 0 | 0        | 0        |
| LTR            | MaLR           | MTB     | chr5  | 75332738 75333130 + | 0 | 0        | 0        |

|                |                |           |       |                     |          |          |          |
|----------------|----------------|-----------|-------|---------------------|----------|----------|----------|
| LTR            | MaLR           | MTB       | chr5  | 75765626 75766019 + | 0        | 0        | 0        |
| Simple_repeat  | Simple_repeat  | (A)n      | chr5  | 76390995 76391036 + | 0        | 0        | 0        |
| Simple_repeat  | Simple_repeat  | (TTTA)n   | chr5  | 76610227 76610267 + | 0        | 0        | 0        |
| SINE           | Alu            | B1_Mm     | chr5  | 77400549 77400705 + | 0        | 0        | 0        |
| Simple_repeat  | Simple_repeat  | (A)n      | chr5  | 77400706 77400729 + | 0        | 0        | 0        |
| LTR            | MaLR           | MTA_Mm    | chr5  | 77554999 77555396 + | 0        | 0        | 0        |
| SINE           | Alu            | B1_Mur1   | chr5  | 77666037 77666179 + | 0        | 0        | 0        |
| Simple_repeat  | Simple_repeat  | (A)n      | chr5  | 77666180 77666203 + | 0        | 0        | 0        |
| SINE           | Alu            | B1_Mm     | chr5  | 77720339 77720468 + | 0        | 0        | 0        |
| Simple_repeat  | Simple_repeat  | (A)n      | chr5  | 77720469 77720492 + | 0        | 0        | 0        |
| LTR            | MaLR           | MTB       | chr5  | 78069434 78069833 + | 0        | 0        | 0        |
| Simple_repeat  | Simple_repeat  | (A)n      | chr5  | 79530078 79530137 + | 0        | 0        | 0        |
| LINE           | L1             | L1Md_F2   | chr5  | 79629285 79634730 - | 0        | 0        | 0        |
| Simple_repeat  | Simple_repeat  | (A)n      | chr5  | 79976441 79976537 + | 0        | 0        | 0        |
| LTR            | MaLR           | MTA_Mm    | chr5  | 80180014 80180391 - | 0        | 0        | 0        |
| Simple_repeat  | Simple_repeat  | (A)n      | chr5  | 80317087 80317131 + | 0.591053 | 0        | 0.342623 |
| Simple_repeat  | Simple_repeat  | (A)n      | chr5  | 80699241 80699277 + | 0        | 0        | 0        |
| SINE           | Alu            | B1_Mus2   | chr5  | 80929421 80929567 - | 0        | 0        | 0        |
| Simple_repeat  | Simple_repeat  | (A)n      | chr5  | 80971609 80971652 + | 0        | 0        | 0        |
| Simple_repeat  | Simple_repeat  | (A)n      | chr5  | 81028523 81028547 + | 0        | 0        | 0        |
| SINE           | Alu            | B1_Mus2   | chr5  | 82457878 82458024 + | 0        | 0        | 0        |
| Simple_repeat  | Simple_repeat  | (A)n      | chr5  | 82458025 82458064 + | 0        | 0        | 0        |
| SINE           | Alu            | B1_Mus1   | chr5  | 82531052 82531198 + | 0        | 0        | 0        |
| Simple_repeat  | Simple_repeat  | (A)n      | chr5  | 82531199 82531287 + | 0        | 0        | 0        |
| Simple_repeat  | Simple_repeat  | (A)n      | chr5  | 82643972 82644013 + | 0        | 0        | 0        |
| SINE           | Alu            | B1_Mm     | chr5  | 82768806 82768936 - | 0        | 0        | 0        |
| Simple_repeat  | Simple_repeat  | (A)n      | chr5  | 82769985 82770019 + | 0        | 0        | 0        |
| SINE           | Alu            | B1_Mus2   | chr5  | 82921272 82921417 + | 0        | 0        | 0        |
| Simple_repeat  | Simple_repeat  | (A)n      | chr5  | 82921418 82921478 + | 0        | 0        | 0        |
| Simple_repeat  | Simple_repeat  | (A)n      | chr5  | 83186090 83186129 + | 0        | 0        | 0        |
| Simple_repeat  | Simple_repeat  | (CAAAAC)n | chr5  | 83348503 83348564 + | 0        | 0        | 0        |
| Simple_repeat  | Simple_repeat  | (A)n      | chr5  | 83348565 83348588 + | 0        | 0        | 0        |
| Simple_repeat  | Simple_repeat  | (A)n      | chr5  | 83354749 83354775 + | 0        | 0        | 0        |
| LTR            | MaLR           | MTA_Mm    | chr5  | 83416919 83417314 - | 0        | 0        | 0        |
| Simple_repeat  | Simple_repeat  | (A)n      | chr5  | 83603042 83603078 + | 0        | 0        | 0        |
| SINE           | Alu            | B1_Mur3   | chr5  | 83622793 83622932 + | 0        | 0        | 0        |
| Low_complexity | Low_complexity | A-rich    | chr5  | 83622933 83623037 + | 0        | 0        | 0        |
| Simple_repeat  | Simple_repeat  | (A)n      | chr5  | 83818988 83819044 + | 0        | 0        | 0        |
| LTR            | MaLR           | MTB       | chr5  | 84888623 84889016 - | 0        | 0        | 0        |
| Simple_repeat  | Simple_repeat  | (A)n      | chr5  | 85645045 85645082 + | 0        | 0        | 0        |
| Simple_repeat  | Simple_repeat  | (A)n      | chr5  | 85685292 85685323 + | 0        | 0        | 0        |
| Simple_repeat  | Simple_repeat  | (A)n      | chr5  | 85726294 85726335 + | 0        | 0        | 0        |
| Simple_repeat  | Simple_repeat  | (A)n      | chr11 | 54516067 54516091 + | 0.923247 | 0.380568 | 0        |
| LTR            | MaLR           | MTA_Mm    | chr5  | 89714621 89715015 + | 0        | 0        | 0        |
| Simple_repeat  | Simple_repeat  | (A)n      | chr5  | 90023587 90023623 + | 0        | 0        | 0        |
| SINE           | Alu            | B1_Mus2   | chr11 | 54610982 54611127 - | 0        | 0        | 0        |
| Simple_repeat  | Simple_repeat  | (A)n      | chr5  | 90357653 90357703 + | 0        | 0        | 0        |
| Low_complexity | Low_complexity | A-rich    | chr5  | 90610415 90610542 + | 0        | 0        | 0        |
| Simple_repeat  | Simple_repeat  | (A)n      | chr5  | 90617267 90617311 + | 0        | 0        | 0        |
| SINE           | Alu            | B1_Mus1   | chr11 | 54646456 54646596 + | 0        | 0        | 0        |
| Simple_repeat  | Simple_repeat  | (A)n      | chr11 | 54646597 54646619 + | 0        | 0        | 0        |
| LTR            | MaLR           | MTA_Mm    | chr5  | 92157649 92158043 - | 0        | 0        | 0        |
| SINE           | Alu            | B1_Mm     | chr5  | 92407018 92407161 + | 0        | 0        | 0        |
| Simple_repeat  | Simple_repeat  | (A)n      | chr5  | 92407162 92407195 + | 0        | 0        | 0        |
| LTR            | MaLR           | MTA_Mm    | chr5  | 93505586 93505980 - | 0        | 0        | 0.615324 |
| SINE           | Alu            | B1_Mus1   | chr5  | 93508945 93509084 - | 0        | 0        | 0        |
| SINE           | Alu            | B1_Mm     | chr5  | 93783060 93783206 + | 0        | 0        | 0        |
| SINE           | Alu            | PB1D9     | chr5  | 93912102 93912210 + | 0        | 0        | 0        |
| Simple_repeat  | Simple_repeat  | (A)n      | chr5  | 93912211 93912248 + | 0        | 0        | 0        |
| Simple_repeat  | Simple_repeat  | (CAAG)n   | chr5  | 93912247 93912267 + | 0        | 0        | 0        |
| SINE           | Alu            | B1_Mus2   | chr5  | 93926219 93926354 - | 0        | 0        | 0        |
| SINE           | Alu            | B1_Mus2   | chr5  | 94269164 94269299 + | 0        | 0        | 0        |
| SINE           | Alu            | PB1D9     | chr5  | 94283295 94283403 - | 0        | 0        | 0        |
| SINE           | Alu            | B1_Mus1   | chr5  | 94363164 94363309 + | 0        | 0        | 0        |
| Simple_repeat  | Simple_repeat  | (A)n      | chr5  | 94363310 94363351 + | 0        | 0        | 0        |
| SINE           | Alu            | B1_Mus2   | chr5  | 94635088 94635224 + | 0.332194 | 0        | 0        |
| SINE           | Alu            | B1_Mus2   | chr5  | 94951518 94951664 + | 0        | 0        | 0.342623 |

|               |               |          |       |                     |          |          |          |
|---------------|---------------|----------|-------|---------------------|----------|----------|----------|
| SINE          | Alu           | B1_Mus2  | chr5  | 95290737 95290873 + | 0        | 0        | 0        |
| Simple_repeat | Simple_repeat | (A)n     | chr5  | 95310346 95310382 + | 0        | 0        | 0        |
| SINE          | Alu           | B1_Mus2  | chr11 | 54909120 54909265 + | 0        | 0        | 0        |
| Simple_repeat | Simple_repeat | (A)n     | chr11 | 54909266 54909287 + | 0        | 0        | 0        |
| SINE          | Alu           | B1_Mus1  | chr5  | 95954363 95954510 + | 0        | 0        | 0        |
| Simple_repeat | Simple_repeat | (A)n     | chr5  | 95954511 95954552 + | 0        | 0        | 0        |
| SINE          | Alu           | B1_Mus1  | chr5  | 96028980 96029125 + | 0        | 0        | 0        |
| Simple_repeat | Simple_repeat | (A)n     | chr5  | 96029126 96029163 + | 0        | 0        | 0        |
| Simple_repeat | Simple_repeat | (A)n     | chr5  | 96428828 96428867 + | 0        | 0        | 0        |
| Simple_repeat | Simple_repeat | (A)n     | chr5  | 98608362 98608397 + | 0        | 0        | 0        |
| Simple_repeat | Simple_repeat | (TTTA)n  | chr5  | 98733725 98733775 + | 0        | 0        | 0        |
| LINE          | L1            | L1Md_T   | chr5  | 99338414 99344953 - | 0        | 0        | 0        |
| Simple_repeat | Simple_repeat | (A)n     | chr5  | 99555181 99555208 + | 0        | 0        | 0        |
| Simple_repeat | Simple_repeat | (A)n     | chr5  | 10015896 10015901 + | 0        | 0        | 0        |
| LTR           | MaLR          | MTA_Mm   | chr5  | 10027225 10027264 + | 0        | 0        | 0        |
| LTR           | MaLR          | MTA_Mm   | chr5  | 10036511 10036550 + | 0.591053 | 0        | 0        |
| LTR           | MaLR          | MTA_Mm   | chr10 | 22138463 22138857 - | 0        | 0        | 0        |
| SINE          | Alu           | B1_Mm    | chr5  | 10118768 10118782 + | 0        | 0        | 0        |
| Simple_repeat | Simple_repeat | (A)n     | chr5  | 10118782 10118785 + | 0        | 0        | 0        |
| Simple_repeat | Simple_repeat | (A)n     | chr5  | 10153720 10153723 + | 0        | 0        | 0        |
| Simple_repeat | Simple_repeat | (A)n     | chr5  | 10186717 10186721 + | 0        | 0.380568 | 0        |
| Simple_repeat | Simple_repeat | (A)n     | chr5  | 10211826 10211833 + | 0        | 0        | 0        |
| SINE          | Alu           | B1_Mus1  | chr5  | 10217810 10217824 + | 0        | 0        | 0        |
| LINE          | L1            | L1Md_T   | chr5  | 10261982 10262645 - | 0        | 0        | 0        |
| SINE          | Alu           | B1_Mm    | chr5  | 10364210 10364224 - | 0        | 0        | 0        |
| Simple_repeat | Simple_repeat | (A)n     | chr5  | 10379763 10379766 + | 0        | 0        | 0.615324 |
| SINE          | Alu           | B1_Mus2  | chr5  | 10414354 10414369 - | 0        | 0        | 0        |
| Simple_repeat | Simple_repeat | (A)n     | chr5  | 10415779 10415783 + | 0        | 0        | 0        |
| SINE          | Alu           | B1_Mus2  | chr5  | 10417251 10417266 - | 0        | 0        | 0        |
| SINE          | Alu           | B1_Mus2  | chr5  | 10513426 10513441 - | 0        | 0        | 0        |
| SINE          | Alu           | B1_Mm    | chr5  | 10519679 10519692 - | 0        | 0        | 0        |
| SINE          | Alu           | B1_Mm    | chr5  | 10582260 10582275 - | 0        | 0        | 0        |
| SINE          | Alu           | B1_Mm    | chr5  | 10610757 10610771 + | 0        | 0        | 0        |
| Simple_repeat | Simple_repeat | (A)n     | chr5  | 10610771 10610775 + | 0        | 0        | 0        |
| Simple_repeat | Simple_repeat | (A)n     | chr5  | 10611493 10611496 + | 0        | 0        | 0        |
| SINE          | B2            | B2_Mm1t  | chr5  | 10629386 10629405 + | 0        | 0        | 0        |
| Simple_repeat | Simple_repeat | (A)n     | chr5  | 10629406 10629407 + | 0        | 0        | 0        |
| SINE          | B2            | B2_Mm1t  | chr5  | 10629407 10629426 + | 0        | 0        | 0        |
| Simple_repeat | Simple_repeat | (A)n     | chr5  | 10629426 10629427 + | 0        | 0        | 0        |
| Simple_repeat | Simple_repeat | (A)n     | chr5  | 10640448 10640451 + | 0        | 0        | 0        |
| LTR           | MaLR          | MTA_Mm   | chr5  | 10668780 10668819 + | 0        | 0        | 0        |
| LTR           | MaLR          | MTB      | chr10 | 22199858 22200191 + | 0        | 0        | 0        |
| Simple_repeat | Simple_repeat | (A)n     | chr5  | 10725838 10725843 + | 0        | 0        | 0        |
| SINE          | Alu           | B1_Mus1  | chr5  | 10795538 10795551 - | 0        | 0        | 0        |
| SINE          | Alu           | B1_Mus2  | chr5  | 10813602 10813616 + | 0        | 0        | 0        |
| Simple_repeat | Simple_repeat | (GAAAA)n | chr5  | 10813616 10813620 + | 0        | 0        | 0        |
| SINE          | Alu           | PB1D9    | chr5  | 10831453 10831464 + | 0        | 0        | 0        |
| Simple_repeat | Simple_repeat | (A)n     | chr5  | 10831464 10831471 + | 0        | 0        | 0        |
| SINE          | Alu           | B1_Mus2  | chr5  | 10843055 10843070 + | 0        | 0        | 0.342623 |
| Simple_repeat | Simple_repeat | (A)n     | chr5  | 10843070 10843077 + | 0        | 0        | 0.342623 |
| Simple_repeat | Simple_repeat | (A)n     | chr5  | 10888388 10888392 + | 0        | 0        | 0        |
| SINE          | Alu           | B1_Mus2  | chr5  | 10911801 10911816 - | 0        | 0        | 0        |
| LTR           | MaLR          | MTA_Mm   | chr5  | 11001030 11001070 + | 0        | 0        | 0        |
| SINE          | Alu           | B1_Mus1  | chr5  | 11003603 11003618 + | 0        | 0        | 0        |
| Simple_repeat | Simple_repeat | (A)n     | chr5  | 11003618 11003622 + | 0        | 0        | 0        |
| Simple_repeat | Simple_repeat | (A)n     | chr5  | 11017650 11017652 + | 0        | 0        | 0        |
| SINE          | B2            | B2_Mm1a  | chr5  | 11090510 11090529 - | 0        | 0        | 0        |
| LTR           | MaLR          | MTA_Mm   | chr5  | 11094239 11094278 - | 0        | 0        | 0        |
| SINE          | Alu           | B1_Mus1  | chr5  | 11174058 11174072 - | 0        | 0        | 0        |
| LTR           | MaLR          | MTA_Mm   | chr5  | 11189168 11189207 - | 0        | 0        | 0        |
| SINE          | Alu           | B1_Mm    | chr11 | 56285979 56286125 + | 0        | 0        | 0        |
| Simple_repeat | Simple_repeat | (A)n     | chr11 | 56286126 56286166 + | 0.332194 | 0.380568 | 0        |
| SINE          | Alu           | B1_Mus2  | chr5  | 11264159 11264174 - | 0        | 0        | 0        |
| SINE          | Alu           | B1_Mus1  | chr5  | 11493345 11493360 - | 0        | 0        | 0        |
| SINE          | Alu           | B1_Mur4  | chr5  | 11500571 11500586 + | 0        | 0        | 0        |
| SINE          | Alu           | B1_Mm    | chr5  | 11501286 11501300 + | 0        | 0        | 0        |
| SINE          | Alu           | B1_Mus2  | chr5  | 11515496 11515510 + | 0        | 0        | 0        |



|               |               |         |       |                     |          |          |          |
|---------------|---------------|---------|-------|---------------------|----------|----------|----------|
| LTR           | ERVK          | RMER4A  | chr5  | 11533828 11533865 - | 0        | 0        | 0        |
| SINE          | Alu           | B1_Mm   | chr5  | 11533867 11533882 - | 0        | 0        | 0        |
| SINE          | Alu           | B1_Mm   | chr5  | 11544114 11544127 + | 0        | 0        | 0        |
| Simple_repeat | Simple_repeat | (A)n    | chr5  | 11544127 11544132 + | 0        | 0        | 0        |
| Simple_repeat | Simple_repeat | (A)n    | chr5  | 11545899 11545906 + | 0        | 0        | 0        |
| LINE          | L1            | L1Md_T  | chr11 | 56613952 56620865 - | 0        | 0        | 0        |
| SINE          | Alu           | B1_Mus2 | chr5  | 11575244 11575258 + | 0        | 1.41763  | 0.615324 |
| Simple_repeat | Simple_repeat | (A)n    | chr5  | 11575258 11575261 + | 0        | 0.708814 | 0        |
| SINE          | Alu           | B1_Mus2 | chr5  | 11628057 11628070 - | 0        | 0        | 0        |
| LTR           | MaLR          | MTA_Mm  | chr11 | 56753799 56754193 + | 0        | 0        | 0        |
| SINE          | Alu           | B1_Mm   | chr5  | 11648397 11648412 + | 0        | 0        | 0        |
| Simple_repeat | Simple_repeat | (A)n    | chr5  | 11648412 11648414 + | 0        | 0        | 0        |
| Simple_repeat | Simple_repeat | (A)n    | chr5  | 11653803 11653806 + | 0        | 0        | 0        |
| Simple_repeat | Simple_repeat | (A)n    | chr5  | 11676275 11676278 + | 0        | 0        | 0        |
| Simple_repeat | Simple_repeat | (A)n    | chr11 | 56815458 56815499 + | 0        | 0        | 0        |
| Simple_repeat | Simple_repeat | (A)n    | chr5  | 11714543 11714546 + | 0        | 0        | 0        |
| SINE          | Alu           | B1_Mus1 | chr5  | 11725848 11725863 + | 0        | 0        | 0        |
| Simple_repeat | Simple_repeat | (A)n    | chr5  | 11725863 11725871 + | 0        | 0        | 0        |
| Simple_repeat | Simple_repeat | (A)n    | chr5  | 11748150 11748154 + | 0        | 0        | 0        |
| SINE          | Alu           | B1_Mus2 | chr10 | 22329454 22329609 - | 0.591053 | 0        | 0        |
| Simple_repeat | Simple_repeat | (A)n    | chr5  | 11893180 11893183 + | 0        | 0        | 0        |
| SINE          | Alu           | B1_Mus2 | chr5  | 12010313 12010327 + | 0        | 0        | 0        |
| SINE          | B2            | B3      | chr5  | 12054387 12054406 + | 0        | 0        | 0        |
| SINE          | B2            | B2_Mm2  | chr5  | 12055451 12055470 - | 0        | 0        | 0        |
| LTR           | MaLR          | MTA_Mm  | chr11 | 57289302 57289695 - | 0        | 0        | 0        |
| LTR           | MaLR          | MTA_Mm  | chr11 | 57382178 57382563 - | 0        | 0        | 0        |
| SINE          | Alu           | PB1D9   | chr11 | 57395550 57395642 - | 0.332194 | 0        | 0        |
| SINE          | Alu           | B1_Mus2 | chr5  | 12195798 12195812 + | 0        | 0        | 0        |
| SINE          | Alu           | B1_Mus1 | chr5  | 12201038 12201053 + | 0        | 0        | 0        |
| SINE          | Alu           | B1_Mus1 | chr5  | 12254008 12254022 - | 0        | 0        | 0        |
| SINE          | Alu           | B1_Mm   | chr5  | 12254544 12254559 - | 0        | 0        | 0        |
| SINE          | Alu           | B1_Mus1 | chr5  | 12259009 12259024 - | 0        | 0        | 0        |
| Simple_repeat | Simple_repeat | (A)n    | chr5  | 12264242 12264245 + | 0        | 0        | 0        |
| SINE          | Alu           | B1_Mm   | chr5  | 12265637 12265652 + | 0        | 0        | 0        |
| Simple_repeat | Simple_repeat | (A)n    | chr5  | 12265652 12265655 + | 0.332194 | 0        | 0        |
| SINE          | Alu           | B1_Mus2 | chr11 | 57603254 57603399 - | 0        | 0        | 0        |
| SINE          | B2            | B2_Mm1a | chr5  | 12351133 12351152 - | 0        | 0        | 0        |
| SINE          | Alu           | B1_Mm   | chr11 | 57639185 57639330 - | 0.332194 | 0        | 0        |
| LTR           | MaLR          | MTB     | chr5  | 12417442 12417478 - | 0        | 0        | 0        |
| SINE          | Alu           | B1_Mus2 | chr5  | 12450752 12450766 - | 0        | 0        | 0        |
| SINE          | Alu           | B1_Mus1 | chr5  | 12480938 12480953 + | 0        | 0        | 0        |
| Simple_repeat | Simple_repeat | (A)n    | chr5  | 12480953 12480957 + | 0        | 0        | 0        |
| SINE          | Alu           | B1_Mm   | chr5  | 12537998 12538012 + | 0        | 0        | 0        |
| SINE          | Alu           | B1_Mus2 | chr5  | 12544245 12544260 - | 0        | 0        | 0        |
| LTR           | MaLR          | MTA_Mm  | chr5  | 12567835 12567875 - | 0        | 0        | 0        |
| Simple_repeat | Simple_repeat | (A)n    | chr5  | 12582225 12582229 + | 0        | 0        | 0        |
| SINE          | Alu           | B1_Mus2 | chr5  | 12583795 12583809 - | 0        | 0        | 0        |
| LTR           | MaLR          | MTA_Mm  | chr5  | 12585652 12585691 + | 0        | 0        | 0        |
| SINE          | Alu           | B1_Mm   | chr11 | 57792362 57792507 - | 0        | 0        | 0        |
| Simple_repeat | Simple_repeat | (A)n    | chr11 | 57799091 57799121 + | 0        | 0        | 0        |
| SINE          | Alu           | B1_Mur4 | chr5  | 12601079 12601088 + | 0        | 0        | 0        |
| Simple_repeat | Simple_repeat | (GAAA)n | chr5  | 12601088 12601093 + | 0        | 0        | 0        |
| Simple_repeat | Simple_repeat | (A)n    | chr5  | 12673716 12673719 + | 0        | 0        | 0        |
| Simple_repeat | Simple_repeat | (A)n    | chr5  | 12718284 12718287 + | 0        | 0        | 0        |
| Simple_repeat | Simple_repeat | (A)n    | chr5  | 12737537 12737542 + | 0        | 0        | 0        |
| LTR           | MaLR          | MTB     | chr5  | 12740200 12740238 + | 0        | 0        | 0        |
| Simple_repeat | Simple_repeat | (A)n    | chr5  | 12760821 12760824 + | 0        | 0        | 0        |
| SINE          | Alu           | B1_Mm   | chr11 | 57994097 57994242 - | 0        | 0        | 0        |
| Simple_repeat | Simple_repeat | (A)n    | chr5  | 12895650 12895653 + | 0        | 0        | 0        |
| LTR           | MaLR          | MTA_Mm  | chr5  | 12917873 12917911 + | 0        | 0        | 0        |
| SINE          | Alu           | B1_Mus1 | chr5  | 12958554 12958568 + | 0        | 0        | 0        |
| Simple_repeat | Simple_repeat | (A)n    | chr5  | 12958568 12958572 + | 0        | 0        | 0        |
| LTR           | MaLR          | MTA_Mm  | chr5  | 12974722 12974761 - | 0        | 0        | 0        |
| SINE          | Alu           | B1_Mm   | chr5  | 12987624 12987637 + | 0        | 0        | 0        |
| Simple_repeat | Simple_repeat | (A)n    | chr5  | 12987637 12987640 + | 0        | 0        | 0        |
| LTR           | MaLR          | MTA_Mm  | chr5  | 13007832 13007871 - | 0        | 0        | 0        |
| SINE          | Alu           | B1_Mm   | chr5  | 13063677 13063692 + | 0        | 0        | 0        |

|                |                |         |       |                     |          |          |          |
|----------------|----------------|---------|-------|---------------------|----------|----------|----------|
| Simple_repeat  | Simple_repeat  | (A)n    | chr5  | 13063692 13063695 + | 0.332194 | 0        | 0        |
| SINE           | Alu            | B1_Mus1 | chr11 | 58208775 58208921 + | 0        | 0        | 0        |
| Simple_repeat  | Simple_repeat  | (A)n    | chr11 | 58208922 58208946 + | 0        | 0        | 0        |
| SINE           | B4             | ID_B1   | chr5  | 13190230 13190251 - | 0        | 0        | 0        |
| LTR            | MaLR           | MTA_Mm  | chr5  | 13308131 13308171 - | 0        | 0        | 0        |
| SINE           | Alu            | PB1D10  | chr10 | 22573493 22573609 - | 0        | 0        | 0        |
| SINE           | Alu            | B1_Mm   | chr11 | 58675838 58675982 + | 0        | 0        | 0.342623 |
| Simple_repeat  | Simple_repeat  | (A)n    | chr11 | 58675983 58676005 + | 0        | 0        | 0.342623 |
| Simple_repeat  | Simple_repeat  | (A)n    | chr5  | 13395145 13395151 + | 5.90476  | 1.41763  | 2.53122  |
| SINE           | Alu            | B1_Mus2 | chr5  | 13481937 13481952 + | 0        | 0        | 0        |
| SINE           | Alu            | B1_Mus2 | chr5  | 13504615 13504629 + | 0        | 0        | 0        |
| Simple_repeat  | Simple_repeat  | (A)n    | chr5  | 13504629 13504632 + | 0        | 0        | 0        |
| SINE           | Alu            | B1_Mm   | chr11 | 59047127 59047278 - | 0        | 0        | 0        |
| SINE           | Alu            | B1_Mus1 | chr5  | 13587703 13587718 - | 0        | 0        | 0        |
| SINE           | Alu            | B1_Mus1 | chr5  | 13615815 13615829 + | 0.332194 | 0        | 0        |
| Simple_repeat  | Simple_repeat  | (A)n    | chr5  | 13615830 13615832 + | 0.332194 | 0        | 0        |
| SINE           | Alu            | B1_Mm   | chr5  | 13643059 13643073 + | 0        | 0        | 0        |
| Simple_repeat  | Simple_repeat  | (A)n    | chr5  | 13643073 13643076 + | 0        | 0        | 0        |
| SINE           | B4             | ID_B1   | chr5  | 13664905 13664924 - | 0.591053 | 0        | 0        |
| SINE           | Alu            | B1_Mm   | chr5  | 13709832 13709847 - | 0        | 0        | 0        |
| SINE           | Alu            | B1_Mus1 | chr11 | 59287185 59287332 - | 0        | 0        | 0        |
| SINE           | Alu            | B1_Mm   | chr5  | 13753219 13753234 - | 0        | 0        | 0        |
| Simple_repeat  | Simple_repeat  | (A)n    | chr11 | 59337230 59337265 + | 0        | 0        | 0        |
| SINE           | Alu            | B1_Mm   | chr5  | 13792024 13792039 + | 0        | 0        | 0        |
| Simple_repeat  | Simple_repeat  | (A)n    | chr5  | 13818650 13818654 + | 0        | 0        | 0        |
| SINE           | Alu            | B1_Mm   | chr5  | 13898524 13898538 - | 0        | 0        | 0        |
| SINE           | Alu            | B1_Mm   | chr5  | 13966478 13966492 + | 0        | 0        | 0        |
| Simple_repeat  | Simple_repeat  | (A)n    | chr5  | 13966492 13966494 + | 0        | 0        | 0        |
| Simple_repeat  | Simple_repeat  | (TAA)n  | chr5  | 13966494 13966497 + | 0        | 0        | 0        |
| SINE           | Alu            | PB1D10  | chr5  | 14031586 14031596 - | 0        | 0        | 0        |
| SINE           | B2             | B2_Mm1a | chr11 | 59714965 59715160 - | 0.591053 | 0.380568 | 0        |
| SINE           | Alu            | B1_Mus1 | chr11 | 59720335 59720437 - | 0        | 0        | 0        |
| SINE           | Alu            | B1_Mm   | chr5  | 14087719 14087731 + | 0        | 0        | 0        |
| Low_complexity | Low_complexity | A-rich  | chr5  | 14087731 14087738 + | 0        | 0        | 0        |
| SINE           | Alu            | B1_Mus2 | chr5  | 14092443 14092458 + | 0        | 0        | 0        |
| Simple_repeat  | Simple_repeat  | (A)n    | chr5  | 14092458 14092461 + | 0        | 0        | 0        |
| SINE           | Alu            | B1_Mm   | chr5  | 14092663 14092677 + | 0        | 0        | 0        |
| Simple_repeat  | Simple_repeat  | (A)n    | chr5  | 14092677 14092679 + | 0        | 0        | 0        |
| SINE           | Alu            | B1_Mus2 | chr5  | 14109164 14109178 + | 0        | 0.708814 | 0        |
| Simple_repeat  | Simple_repeat  | (A)n    | chr5  | 14109178 14109183 + | 0.332194 | 0.380568 | 0.342623 |
| Simple_repeat  | Simple_repeat  | (A)n    | chr5  | 14283082 14283087 + | 0        | 0        | 0.342623 |
| SINE           | B4             | ID_B1   | chr5  | 14317004 14317024 - | 0        | 0        | 0        |
| SINE           | Alu            | B1_Mus1 | chr5  | 14362156 14362170 - | 0        | 0.380568 | 0        |
| SINE           | Alu            | B1_Mus1 | chr5  | 14388808 14388823 - | 0        | 0        | 0        |
| SINE           | Alu            | B1_Mus2 | chr5  | 14483514 14483528 + | 0        | 0        | 0.615324 |
| Simple_repeat  | Simple_repeat  | (A)n    | chr5  | 14483528 14483538 + | 0        | 0        | 0.615324 |
| SINE           | Alu            | B1_Mus1 | chr5  | 14519740 14519754 + | 0        | 0        | 0        |
| SINE           | Alu            | B1_Mus2 | chr5  | 14574046 14574061 + | 0        | 0        | 0        |
| Simple_repeat  | Simple_repeat  | (A)n    | chr5  | 14574061 14574064 + | 0        | 0        | 0        |
| Simple_repeat  | Simple_repeat  | (A)n    | chr5  | 14605469 14605472 + | 0.591053 | 0        | 0        |
| Simple_repeat  | Simple_repeat  | (A)n    | chr5  | 14625742 14625746 + | 0        | 0        | 0.615324 |
| SINE           | Alu            | B1_Mus2 | chr5  | 14701206 14701220 - | 1.18211  | 0.708814 | 1.23065  |
| SINE           | Alu            | B1_Mus1 | chr5  | 14719111 14719126 - | 0        | 0        | 0        |
| Simple_repeat  | Simple_repeat  | (A)n    | chr11 | 60450611 60450650 + | 0        | 0        | 0.342623 |
| SINE           | Alu            | B1_Mus1 | chr5  | 14738861 14738876 + | 0        | 0        | 0        |
| Simple_repeat  | Simple_repeat  | (A)n    | chr5  | 14738876 14738878 + | 0        | 0        | 0        |
| SINE           | Alu            | B1_Mm   | chr5  | 14753276 14753290 - | 0        | 0        | 0        |
| LTR            | MaLR           | MTB     | chr5  | 14754267 14754307 - | 0        | 0        | 0.615324 |
| SINE           | Alu            | B1_Mus1 | chr5  | 14763900 14763914 - | 0        | 0        | 0        |
| Simple_repeat  | Simple_repeat  | (A)n    | chr5  | 14777545 14777549 + | 0        | 0        | 0        |
| SINE           | Alu            | B1_Mus1 | chr5  | 14779089 14779104 - | 0        | 0        | 0        |
| SINE           | Alu            | B1_Mm   | chr5  | 14813664 14813679 - | 0        | 0        | 0        |
| SINE           | Alu            | B1_Mur4 | chr5  | 14836583 14836597 - | 0        | 0        | 0        |
| LTR            | MaLR           | MTA_Mm  | chr5  | 14967052 14967091 - | 0        | 0        | 0        |
| SINE           | Alu            | B1_Mm   | chr5  | 14974125 14974139 + | 0        | 0        | 0        |
| Simple_repeat  | Simple_repeat  | (A)n    | chr5  | 14974139 14974142 + | 0        | 0        | 0        |
| SINE           | Alu            | B1_Mus1 | chr5  | 14975644 14975658 - | 0        | 0        | 0.615324 |

|               |               |         |       |                     |          |          |          |
|---------------|---------------|---------|-------|---------------------|----------|----------|----------|
| LTR           | MaLR          | MTB     | chr5  | 14984086 14984126 + | 0        | 0        | 0        |
| SINE          | Alu           | B1_Mus2 | chr11 | 60782836 60782982 - | 0        | 0        | 0        |
| SINE          | Alu           | B1_Mus2 | chr5  | 15171229 15171243 + | 0        | 0        | 0        |
| Simple_repeat | Simple_repeat | (A)n    | chr5  | 15171244 15171246 + | 0        | 0        | 0        |
| SINE          | Alu           | B1_Mm   | chr5  | 15171584 15171599 - | 0        | 0        | 0        |
| SINE          | Alu           | B1_Mm   | chr5  | 15228304 15228318 + | 0        | 0        | 0        |
| Simple_repeat | Simple_repeat | (A)n    | chr5  | 15228318 15228320 + | 0        | 0        | 0        |
| LINE          | L1            | L1_Mus4 | chr5  | 15241732 15242262 - | 0        | 0        | 0        |
| Simple_repeat | Simple_repeat | (A)n    | chr5  | 15246493 15246497 + | 0        | 0        | 0.342623 |
| LTR           | MaLR          | MTA_Mm  | chr5  | 15250322 15250362 - | 0        | 0        | 0        |
| LTR           | MaLR          | MTA_Mm  | chr5  | 15250471 15250511 - | 0        | 0        | 0        |
| LTR           | MaLR          | MTA_Mm  | chr6  | 3398148 3398543 +   | 0        | 0        | 0        |
| LTR           | MaLR          | MTA_Mm  | chr6  | 3399641 3400036 +   | 0        | 0        | 0        |
| Simple_repeat | Simple_repeat | (A)n    | chr6  | 4388908 4388935 +   | 0        | 0        | 0        |
| LTR           | MaLR          | MTA_Mm  | chr6  | 5402618 5403012 +   | 0        | 0        | 0        |
| SINE          | Alu           | PB1D9   | chr6  | 5508419 5508519 -   | 0        | 0        | 0        |
| SINE          | Alu           | B1_Mus2 | chr6  | 5634784 5634929 -   | 0        | 0        | 0        |
| LTR           | MaLR          | MTA_Mm  | chr6  | 5635993 5636388 +   | 0        | 0        | 0        |
| SINE          | Alu           | B1_Mm   | chr6  | 6298543 6298690 -   | 0.591053 | 0        | 0        |
| SINE          | Alu           | B1_Mus1 | chr6  | 6668116 6668263 +   | 0        | 0        | 0        |
| Simple_repeat | Simple_repeat | (A)n    | chr6  | 6668264 6668290 +   | 0        | 0        | 0        |
| SINE          | Alu           | B1_Mus2 | chr6  | 7223290 7223435 +   | 0        | 0        | 0        |
| Simple_repeat | Simple_repeat | (A)n    | chr6  | 7223436 7223472 +   | 0        | 0        | 0        |
| Simple_repeat | Simple_repeat | (A)n    | chr6  | 7256755 7256830 +   | 0        | 0        | 0        |
| Simple_repeat | Simple_repeat | (A)n    | chr6  | 7689470 7689501 +   | 0        | 0        | 0        |
| LTR           | ERV1          | RLTR24  | chr6  | 7703849 7704360 +   | 0        | 0        | 0        |
| SINE          | Alu           | B1_Mus1 | chr6  | 7713447 7713594 -   | 0        | 0        | 0        |
| Simple_repeat | Simple_repeat | (A)n    | chr11 | 61328999 61329058 + | 1.18211  | 0        | 1.84597  |
| Simple_repeat | Simple_repeat | (A)n    | chr6  | 9228117 9228174 +   | 0        | 0        | 0        |
| SINE          | Alu           | B1_Mus2 | chr6  | 9282774 9282915 -   | 0        | 0        | 0        |
| SINE          | Alu           | B1_Mus1 | chr11 | 61405169 61405302 + | 0        | 0        | 0        |
| Simple_repeat | Simple_repeat | (A)n    | chr11 | 61405303 61405335 + | 0        | 0        | 0        |
| Simple_repeat | Simple_repeat | (A)n    | chr6  | 9543303 9543341 +   | 0        | 0        | 0        |
| LTR           | MaLR          | MTA_Mm  | chr6  | 10749687 10750081 - | 0        | 0        | 0        |
| LINE          | L1            | L1Md_F2 | chr6  | 10754546 10759533 + | 0        | 0        | 0        |
| LTR           | MaLR          | MTA_Mm  | chr6  | 11003273 11003668 - | 0        | 0        | 0        |
| Simple_repeat | Simple_repeat | (A)n    | chr6  | 11142889 11142916 + | 0        | 0        | 0        |
| LTR           | ERVK          | BGLII   | chr6  | 11293183 11293638 - | 0        | 0        | 0        |
| LINE          | L1            | L1Md_T  | chr6  | 11692603 11699447 - | 0        | 0        | 0        |
| SINE          | Alu           | B1_Mus2 | chr6  | 12086938 12087084 + | 0.591053 | 0        | 0.615324 |
| Simple_repeat | Simple_repeat | (A)n    | chr6  | 12087085 12087107 + | 0        | 0        | 0        |
| LINE          | L1            | L1Md_F2 | chr6  | 12173286 12179332 - | 0        | 0        | 0        |
| Simple_repeat | Simple_repeat | (A)n    | chr6  | 13349775 13349815 + | 0        | 0        | 0        |
| LTR           | MaLR          | MTA_Mm  | chr6  | 13431456 13431847 - | 0        | 0        | 0        |
| LTR           | MaLR          | MTA_Mm  | chr6  | 13668024 13668422 - | 0        | 0        | 0        |
| Simple_repeat | Simple_repeat | (A)n    | chr6  | 14191269 14191296 + | 0        | 0        | 0        |
| Simple_repeat | Simple_repeat | (A)n    | chr6  | 14440562 14440598 + | 0        | 0        | 0        |
| Simple_repeat | Simple_repeat | (A)n    | chr6  | 15474851 15474889 + | 0.591053 | 0        | 0        |
| Simple_repeat | Simple_repeat | (A)n    | chr6  | 15505807 15505833 + | 0        | 0        | 0        |
| SINE          | Alu           | B1_Mm   | chr11 | 61755420 61755565 - | 0        | 0        | 0        |
| SINE          | Alu           | B1_Mus2 | chr6  | 15846488 15846605 - | 0        | 0        | 0        |
| Simple_repeat | Simple_repeat | (A)n    | chr6  | 16281944 16281972 + | 0        | 0        | 0        |
| Simple_repeat | Simple_repeat | (A)n    | chr6  | 16983599 16983641 + | 0        | 0.708814 | 0.615324 |
| Simple_repeat | Simple_repeat | (A)n    | chr6  | 17536925 17536951 + | 0        | 0        | 0        |
| SINE          | Alu           | B1_Mus1 | chr6  | 17655804 17655947 + | 0        | 0        | 0        |
| SINE          | Alu           | B1_Mus2 | chr6  | 17694394 17694540 - | 0        | 0        | 0        |
| LINE          | L1            | L1Md_T  | chr6  | 18112286 18119018 - | 0        | 0        | 0        |
| Simple_repeat | Simple_repeat | (A)n    | chr6  | 18483469 18483506 + | 0        | 0        | 0        |
| LINE          | L1            | L1Md_F2 | chr6  | 18957307 18962717 - | 0        | 0        | 0        |
| LTR           | MaLR          | MTA_Mm  | chr6  | 19357503 19357896 - | 0        | 0        | 0        |
| LINE          | L1            | L1Md_F  | chr6  | 19616859 19621345 - | 0        | 0        | 0        |
| Simple_repeat | Simple_repeat | (A)n    | chr6  | 19837747 19837775 + | 0        | 0        | 0        |
| SINE          | Alu           | B1_Mus2 | chr6  | 19847553 19847698 - | 0        | 0        | 0        |
| Simple_repeat | Simple_repeat | (A)n    | chr6  | 19893176 19893228 + | 0        | 0        | 0        |
| LINE          | L1            | L1Md_F3 | chr6  | 19927306 19933485 - | 0        | 0        | 0        |
| LTR           | MaLR          | MTA_Mm  | chr6  | 20225638 20226031 + | 0        | 0        | 0        |
| LINE          | L1            | L1_Mus3 | chr6  | 20417553 20422686 + | 0        | 0        | 0        |

|                |                |         |       |                     |          |          |          |
|----------------|----------------|---------|-------|---------------------|----------|----------|----------|
| LINE           | L1             | L1Md_F2 | chr6  | 20557760 20562957 + | 0        | 0        | 0        |
| LINE           | L1             | L1Md_F2 | chr6  | 20578973 20585158 + | 0        | 0        | 0        |
| Simple_repeat  | Simple_repeat  | (A)n    | chr6  | 21806341 21806369 + | 0        | 0        | 0        |
| LTR            | MaLR           | MTA_Mm  | chr6  | 21882690 21883084 + | 0        | 0        | 0        |
| LTR            | MaLR           | MTA_Mm  | chr6  | 22713729 22714124 - | 0        | 0        | 0        |
| SINE           | Alu            | B1_Mus2 | chr6  | 25552394 25552540 + | 0        | 0        | 0        |
| Simple_repeat  | Simple_repeat  | (A)n    | chr6  | 25552541 25552563 + | 0        | 0        | 0        |
| SINE           | Alu            | B1_Mus2 | chr6  | 26241579 26241726 - | 0        | 0        | 0        |
| SINE           | Alu            | B1_Mus1 | chr6  | 26343175 26343322 - | 0        | 0        | 0        |
| LTR            | MaLR           | MTA_Mm  | chr6  | 26546873 26547268 + | 0        | 0        | 0        |
| Simple_repeat  | Simple_repeat  | (A)n    | chr11 | 62387588 62387626 + | 0        | 0        | 0        |
| SINE           | Alu            | B1_Mus2 | chr6  | 26767094 26767242 + | 0        | 0        | 0        |
| Simple_repeat  | Simple_repeat  | (A)n    | chr6  | 26767243 26767264 + | 0        | 0        | 0        |
| LINE           | L1             | L1Md_T  | chr6  | 26824939 26831447 - | 0        | 0        | 0        |
| SINE           | Alu            | B1_Mus1 | chr6  | 26896625 26896771 + | 0        | 0        | 0        |
| Simple_repeat  | Simple_repeat  | (A)n    | chr6  | 26896772 26896811 + | 0        | 0        | 0        |
| SINE           | Alu            | B1_Mm   | chr11 | 62413844 62413989 + | 0.591053 | 0        | 0        |
| Simple_repeat  | Simple_repeat  | (A)n    | chr11 | 62413990 62414012 + | 0.923247 | 0        | 0        |
| SINE           | Alu            | B1_Mm   | chr6  | 28258854 28258999 - | 0        | 0        | 0.342623 |
| Simple_repeat  | Simple_repeat  | (A)n    | chr6  | 28881069 28881095 + | 0        | 0        | 0        |
| SINE           | Alu            | B1_Mm   | chr6  | 29167671 29167819 + | 0        | 0.380568 | 0.342623 |
| Simple_repeat  | Simple_repeat  | (A)n    | chr6  | 29379569 29379608 + | 0        | 0        | 0        |
| SINE           | Alu            | B1_Mm   | chr6  | 29575307 29575453 - | 0        | 0        | 0        |
| SINE           | Alu            | B1_Mus1 | chr6  | 29670647 29670793 + | 0        | 0        | 0        |
| Simple_repeat  | Simple_repeat  | (A)n    | chr6  | 29670794 29670816 + | 0        | 0        | 0        |
| SINE           | Alu            | B1_Mus2 | chr6  | 29990728 29990874 - | 0        | 0        | 0        |
| SINE           | B2             | B2_Mm1a | chr6  | 29992086 29992277 + | 0        | 0        | 0        |
| SINE           | Alu            | B1_Mur3 | chr6  | 30106239 30106379 + | 0        | 0        | 0        |
| SINE           | Alu            | B1_Mus1 | chr6  | 30155395 30155540 - | 0        | 0        | 0        |
| SINE           | Alu            | B1_Mus2 | chr6  | 30273183 30273322 - | 0        | 0        | 0        |
| SINE           | Alu            | B1_Mus2 | chr6  | 30307131 30307257 + | 0        | 0        | 0        |
| Simple_repeat  | Simple_repeat  | (A)n    | chr6  | 30307258 30307280 + | 0        | 0        | 0        |
| SINE           | Alu            | B1_Mus2 | chr6  | 31462125 31462270 + | 4.41242  | 2.17876  | 3.07662  |
| Simple_repeat  | Simple_repeat  | (A)n    | chr6  | 31462271 31462300 + | 5.07681  | 2.17876  | 2.87384  |
| Simple_repeat  | Simple_repeat  | (A)n    | chr6  | 31890244 31890278 + | 0        | 0        | 0        |
| LTR            | MaLR           | MTA_Mm  | chr6  | 32719156 32719547 + | 0        | 0        | 0        |
| SINE           | Alu            | B1_Mm   | chr11 | 63142516 63142664 - | 0        | 0        | 0        |
| SINE           | Alu            | B1_Mus2 | chr11 | 63170006 63170150 - | 0        | 0        | 0        |
| LINE           | L1             | L1Md_T  | chr6  | 35289469 35296397 - | 0        | 0        | 0        |
| SINE           | Alu            | B1_Mus1 | chr6  | 35873431 35873557 + | 0        | 0        | 0        |
| Simple_repeat  | Simple_repeat  | (A)n    | chr6  | 35873558 35873594 + | 0        | 0        | 0        |
| Simple_repeat  | Simple_repeat  | (A)n    | chr6  | 35944656 35944705 + | 0        | 0        | 0        |
| SINE           | Alu            | B1_Mus1 | chr11 | 63321623 63321747 - | 0        | 0        | 0        |
| SINE           | Alu            | B1_Mus1 | chr6  | 36481254 36481404 + | 0        | 0        | 0        |
| Simple_repeat  | Simple_repeat  | (A)n    | chr6  | 36481405 36481446 + | 0        | 0        | 0        |
| LTR            | MaLR           | MTA_Mm  | chr6  | 36502702 36503095 + | 0        | 0        | 0        |
| SINE           | Alu            | B1_Mm   | chr6  | 36580608 36580752 + | 0        | 0        | 0        |
| Low_complexity | Low_complexity | A-rich  | chr6  | 36580753 36580923 + | 0        | 0        | 0        |
| LTR            | MaLR           | MTB     | chr6  | 37545469 37545856 + | 0        | 0        | 0        |
| LTR            | MaLR           | MTA_Mm  | chr6  | 37549963 37550355 + | 0        | 0        | 0        |
| LTR            | MaLR           | MTA_Mm  | chr6  | 37666145 37666536 - | 0        | 0        | 0        |
| SINE           | Alu            | B1_Mus2 | chr6  | 37710966 37711112 + | 0        | 0        | 0        |
| Simple_repeat  | Simple_repeat  | (A)n    | chr6  | 37711113 37711153 + | 0        | 0        | 0.342623 |
| SINE           | Alu            | B1_Mus2 | chr6  | 37743689 37743835 + | 0        | 0        | 0        |
| Simple_repeat  | Simple_repeat  | (A)n    | chr6  | 37743836 37743894 + | 0.332194 | 0        | 0        |
| LTR            | MaLR           | MTA_Mm  | chr6  | 37772082 37772477 - | 0        | 0        | 0        |
| SINE           | Alu            | B1_Mus2 | chr6  | 38256162 38256308 + | 0        | 0        | 0        |
| Simple_repeat  | Simple_repeat  | (A)n    | chr6  | 38256309 38256332 + | 0        | 0        | 0        |
| SINE           | Alu            | B1_Mus2 | chr6  | 38257914 38258060 - | 0        | 0        | 0        |
| Simple_repeat  | Simple_repeat  | (A)n    | chr6  | 38307100 38307126 + | 0        | 0        | 0        |
| SINE           | Alu            | B1_Mus2 | chr6  | 38382693 38382815 + | 0        | 0        | 0        |
| Simple_repeat  | Simple_repeat  | (A)n    | chr6  | 38382816 38382841 + | 0        | 0        | 0        |
| SINE           | Alu            | B1_Mus2 | chr6  | 38463934 38464084 - | 0        | 0        | 0        |
| SINE           | Alu            | B1_Mus2 | chr6  | 38478814 38478962 + | 0        | 0.708814 | 0        |
| Simple_repeat  | Simple_repeat  | (A)n    | chr6  | 38478963 38478987 + | 0        | 0        | 0        |
| Simple_repeat  | Simple_repeat  | (A)n    | chr6  | 39700292 39700365 + | 0        | 0        | 0        |
| LTR            | MaLR           | MTA_Mm  | chr6  | 39764714 39765109 + | 0        | 0        | 0        |

|               |               |         |       |                     |          |          |          |
|---------------|---------------|---------|-------|---------------------|----------|----------|----------|
| LTR           | MaLR          | MTA_Mm  | chr6  | 39785203 39785597 + | 0        | 0        | 0        |
| LTR           | MaLR          | MTB     | chr6  | 40208450 40208849 - | 0        | 0        | 0        |
| LTR           | MaLR          | MTA_Mm  | chr6  | 40272308 40272690 + | 0        | 0        | 0        |
| SINE          | Alu           | B1_Mm   | chr6  | 41293714 41293859 - | 0        | 0        | 0        |
| SINE          | Alu           | B1_Mm   | chr6  | 42364540 42364685 - | 0        | 0        | 0        |
| LTR           | MaLR          | MTA_Mm  | chr6  | 42367216 42367592 - | 0        | 0        | 0        |
| LTR           | MaLR          | MTA_Mm  | chr6  | 42387774 42388167 + | 0        | 0        | 0        |
| LTR           | MaLR          | MTA_Mm  | chr6  | 42389260 42389653 + | 0        | 0        | 0        |
| LTR           | MaLR          | MTA_Mm  | chr6  | 42663259 42663657 + | 0        | 0        | 0        |
| SINE          | Alu           | B1_Mus2 | chr6  | 42825413 42825559 + | 0        | 0        | 0        |
| Simple_repeat | Simple_repeat | (A)n    | chr6  | 42825560 42825599 + | 0        | 0        | 0        |
| SINE          | Alu           | B1_Mm   | chr6  | 43986930 43987067 - | 0        | 0        | 0        |
| SINE          | Alu           | B1_Mus2 | chr6  | 44277313 44277459 + | 0        | 0        | 0        |
| LTR           | MaLR          | MTA_Mm  | chr6  | 44413856 44414256 - | 0        | 0        | 0        |
| LINE          | L1            | L1Md_F2 | chr6  | 44503082 44509533 - | 0        | 0        | 0        |
| LTR           | MaLR          | MTA_Mm  | chr11 | 64502426 64502809 + | 0        | 0        | 0        |
| LTR           | MaLR          | MTA_Mm  | chr6  | 47263151 47263546 - | 0        | 0        | 0        |
| LTR           | MaLR          | MTA_Mm  | chr6  | 47301197 47301592 - | 0        | 0        | 0        |
| SINE          | Alu           | B1_Mm   | chr6  | 47336067 47336212 - | 0        | 0        | 0        |
| SINE          | Alu           | B1_Mus1 | chr6  | 47366480 47366625 - | 0        | 0        | 0        |
| scRNA         | scRNA         | 4.5SRNA | chr6  | 47600761 47600854 - | 0.332194 | 1.32017  | 0.342623 |
| scRNA         | scRNA         | 4.5SRNA | chr6  | 47698497 47698590 - | 3.13357  | 0        | 2.32725  |
| scRNA         | scRNA         | 4.5SRNA | chr6  | 47707665 47707758 - | 0        | 0        | 0        |
| scRNA         | scRNA         | 4.5SRNA | chr6  | 47713263 47713356 - | 0.332194 | 0.380568 | 4.24948  |
| scRNA         | scRNA         | 4.5SRNA | chr6  | 47717586 47717660 - | 0        | 0        | 0        |
| SINE          | Alu           | PB1D10  | chr6  | 47717592 47717687 - | 0        | 0        | 0        |
| scRNA         | scRNA         | 4.5SRNA | chr6  | 47721993 47722067 - | 0        | 0        | 0        |
| SINE          | Alu           | PB1D10  | chr6  | 47721999 47722094 - | 0        | 0        | 0        |
| scRNA         | scRNA         | 4.5SRNA | chr6  | 47728245 47728338 - | 5.81523  | 3.69765  | 3.56423  |
| SINE          | Alu           | B1_Mus2 | chr6  | 47864837 47864982 - | 0        | 0        | 0        |
| Simple_repeat | Simple_repeat | (A)n    | chr6  | 48239128 48239167 + | 0        | 0        | 0        |
| Simple_repeat | Simple_repeat | (A)n    | chr6  | 48305289 48305332 + | 0        | 0        | 0        |
| SINE          | Alu           | B1_Mm   | chr6  | 48624566 48624710 + | 0        | 0        | 0        |
| Simple_repeat | Simple_repeat | (A)n    | chr6  | 48624711 48624738 + | 0        | 0        | 0        |
| Simple_repeat | Simple_repeat | (A)n    | chr11 | 64766419 64766454 + | 0        | 0        | 0        |
| SINE          | Alu           | B1_Mus1 | chr6  | 50149669 50149807 - | 0        | 0        | 0        |
| SINE          | Alu           | B1_Mur4 | chr6  | 50695445 50695603 + | 0        | 0        | 0        |
| Simple_repeat | Simple_repeat | (GAAA)n | chr6  | 50695604 50695666 + | 0        | 0        | 0        |
| Simple_repeat | Simple_repeat | (A)n    | chr6  | 50980689 50980715 + | 0        | 0        | 0        |
| SINE          | Alu           | B1_Mus1 | chr6  | 51448730 51448876 - | 0        | 0        | 0        |
| SINE          | Alu           | B1_Mm   | chr6  | 51603437 51603594 + | 0        | 0        | 0        |
| Simple_repeat | Simple_repeat | (A)n    | chr6  | 51603595 51603616 + | 0        | 0        | 0        |
| SINE          | Alu           | B1_Mur2 | chr6  | 52018187 52018324 + | 0        | 0        | 0        |
| Simple_repeat | Simple_repeat | (A)n    | chr6  | 52018325 52018358 + | 0        | 0        | 0        |
| SINE          | Alu           | B1_Mur1 | chr6  | 52059063 52059207 - | 0        | 0        | 0        |
| SINE          | Alu           | B1_Mm   | chr6  | 52084386 52084531 + | 0        | 0        | 0        |
| Simple_repeat | Simple_repeat | (A)n    | chr6  | 52084532 52084566 + | 0        | 0        | 0        |
| SINE          | Alu           | B1_Mus1 | chr6  | 52355513 52355661 - | 0        | 0        | 0        |
| SINE          | Alu           | B1_Mus1 | chr6  | 52402920 52403067 + | 0        | 0        | 0        |
| Simple_repeat | Simple_repeat | (A)n    | chr6  | 52403068 52403091 + | 0.332194 | 0        | 0        |
| SINE          | Alu           | B1_Mm   | chr11 | 65158937 65159082 - | 0        | 0        | 0        |
| SINE          | Alu           | B1_Mm   | chr6  | 52627790 52627936 - | 0        | 0        | 0        |
| LTR           | MaLR          | MTA_Mm  | chr6  | 53414214 53414596 + | 0        | 0        | 0        |
| LTR           | MaLR          | MTA_Mm  | chr6  | 53415694 53416076 + | 0.332194 | 0.708814 | 0        |
| Simple_repeat | Simple_repeat | (A)n    | chr6  | 53488980 53489016 + | 0        | 0        | 0        |
| Simple_repeat | Simple_repeat | (A)n    | chr6  | 53715270 53715295 + | 0        | 0        | 0        |
| SINE          | Alu           | B1_Mus1 | chr6  | 54679987 54680134 - | 0        | 0        | 0        |
| SINE          | Alu           | B1_Mus2 | chr6  | 55568502 55568647 + | 0        | 0        | 0        |
| Simple_repeat | Simple_repeat | (A)n    | chr6  | 55568648 55568697 + | 0        | 0        | 0        |
| SINE          | Alu           | B1_Mus2 | chr6  | 56664136 56664281 + | 0        | 0        | 0        |
| Simple_repeat | Simple_repeat | (A)n    | chr6  | 56664282 56664304 + | 0        | 0        | 0        |
| Simple_repeat | Simple_repeat | (A)n    | chr6  | 57162240 57162281 + | 0        | 0        | 0        |
| SINE          | Alu           | B1_Mm   | chr6  | 57197913 57198058 - | 0        | 0        | 0        |
| SINE          | Alu           | B1_Mm   | chr6  | 57516260 57516406 + | 0        | 0        | 0        |
| SINE          | Alu           | B1_Mus1 | chr6  | 59708695 59708841 + | 0        | 0        | 0        |
| Simple_repeat | Simple_repeat | (A)n    | chr6  | 59708842 59708887 + | 0        | 0        | 0        |
| Simple_repeat | Simple_repeat | (A)n    | chr6  | 60128013 60128050 + | 0        | 0        | 0        |

|               |               |         |       |                     |          |          |          |
|---------------|---------------|---------|-------|---------------------|----------|----------|----------|
| Simple_repeat | Simple_repeat | (A)n    | chr6  | 60201082 60201147 + | 0        | 0        | 0        |
| SINE          | Alu           | B1_Mus2 | chr10 | 23489873 23490019 - | 0        | 0        | 0        |
| Simple_repeat | Simple_repeat | (A)n    | chr6  | 60943833 60943868 + | 0        | 0        | 0        |
| SINE          | Alu           | B1_Mus2 | chr6  | 62423244 62423395 - | 0        | 0        | 0        |
| Simple_repeat | Simple_repeat | (A)n    | chr6  | 62551059 62551098 + | 0        | 0        | 0        |
| Simple_repeat | Simple_repeat | (A)n    | chr10 | 23510118 23510150 + | 0        | 0        | 0        |
| Simple_repeat | Simple_repeat | (A)n    | chr6  | 64681543 64681580 + | 0        | 0        | 0        |
| LINE          | L1            | L1Md_T  | chr6  | 65152421 65158900 - | 0        | 0        | 0        |
| SINE          | Alu           | B1_Mm   | chr6  | 65158929 65159064 + | 0        | 0        | 0        |
| Simple_repeat | Simple_repeat | (A)n    | chr6  | 65159065 65159093 + | 0        | 0        | 0        |
| Simple_repeat | Simple_repeat | (A)n    | chr6  | 65253368 65253400 + | 0        | 0        | 0        |
| Simple_repeat | Simple_repeat | (A)n    | chr6  | 65254918 65254956 + | 0.332194 | 0        | 0        |
| LINE          | L1            | L1VL4   | chr6  | 66078485 66083685 - | 0        | 0        | 0        |
| LINE          | L1            | L1VL4   | chr6  | 66191313 66194086 + | 0        | 0        | 0        |
| LINE          | L1            | L1Md_T  | chr6  | 66408595 66414529 - | 0        | 0        | 0        |
| SINE          | Alu           | B1_Mus1 | chr6  | 67209230 67209383 + | 0        | 0        | 0        |
| Simple_repeat | Simple_repeat | (A)n    | chr6  | 67209384 67209421 + | 0        | 0        | 0        |
| Simple_repeat | Simple_repeat | (A)n    | chr6  | 67451058 67451096 + | 0        | 0        | 0        |
| Simple_repeat | Simple_repeat | (A)n    | chr6  | 67487505 67487544 + | 0        | 0        | 0        |
| LINE          | L1            | L1Md_T  | chr6  | 67526312 67533627 - | 0        | 0        | 0        |
| LINE          | L1            | L1Md_F3 | chr6  | 67544935 67550133 + | 0        | 0        | 0        |
| SINE          | Alu           | B1_Mus2 | chr6  | 67581328 67581474 + | 0        | 0        | 0        |
| LTR           | MaLR          | MTA_Mm  | chr6  | 67884450 67884845 - | 0        | 0        | 0        |
| LINE          | L1            | L1Md_F2 | chr6  | 68223311 68230134 - | 0        | 0        | 0        |
| Simple_repeat | Simple_repeat | (A)n    | chr6  | 68357727 68357774 + | 0        | 0        | 0        |
| LINE          | L1            | L1Md_F2 | chr6  | 68362603 68367970 + | 0        | 0        | 0        |
| LTR           | MaLR          | MTA_Mm  | chr6  | 68711205 68711597 + | 0        | 0        | 0        |
| SINE          | Alu           | B1_Mus2 | chr6  | 69993251 69993397 + | 0        | 0        | 0        |
| Simple_repeat | Simple_repeat | (A)n    | chr6  | 69993398 69993438 + | 0        | 0        | 0        |
| SINE          | Alu           | B1_Mm   | chr6  | 70244172 70244317 - | 0        | 0        | 0        |
| Simple_repeat | Simple_repeat | (A)n    | chr6  | 70760433 70760471 + | 0        | 0        | 0        |
| LTR           | MaLR          | MTA_Mm  | chr10 | 23550230 23550625 - | 0.332194 | 0        | 0        |
| LTR           | MaLR          | MTA_Mm  | chr10 | 23551723 23552118 - | 0        | 0        | 0        |
| SINE          | Alu           | B1_Mur2 | chr6  | 70997461 70997603 - | 0        | 0        | 0        |
| SINE          | Alu           | B1_Mus2 | chr6  | 71443325 71443470 - | 0.591053 | 0        | 0        |
| Simple_repeat | Simple_repeat | (A)n    | chr6  | 71780856 71780908 + | 0        | 0        | 0        |
| SINE          | Alu           | B1_Mus2 | chr6  | 72401690 72401835 + | 0        | 0        | 0        |
| Simple_repeat | Simple_repeat | (A)n    | chr6  | 72790988 72791025 + | 0        | 0        | 0        |
| Simple_repeat | Simple_repeat | (A)n    | chr6  | 74392703 74392737 + | 0        | 0        | 0        |
| Simple_repeat | Simple_repeat | (A)n    | chr6  | 74636848 74636895 + | 0        | 0        | 0        |
| SINE          | Alu           | B1_Mus2 | chr6  | 74716404 74716548 - | 0        | 0        | 0        |
| Simple_repeat | Simple_repeat | (A)n    | chr6  | 74881963 74882009 + | 0        | 0        | 0        |
| LINE          | L1            | L1Md_F2 | chr6  | 75082287 75087307 - | 0        | 0        | 0        |
| SINE          | Alu           | B1_Mus1 | chr6  | 75212977 75213122 + | 0        | 0        | 0        |
| Simple_repeat | Simple_repeat | (A)n    | chr6  | 75213123 75213152 + | 0        | 0        | 0        |
| SINE          | Alu           | B1_Mus1 | chr6  | 75538495 75538642 - | 0        | 0        | 0        |
| Simple_repeat | Simple_repeat | (A)n    | chr6  | 75773684 75773734 + | 0        | 0        | 0        |
| SINE          | Alu           | B1_Mus1 | chr6  | 75926108 75926233 - | 0        | 0        | 0        |
| LTR           | MaLR          | MTA_Mm  | chr6  | 75965375 75965756 + | 0        | 0        | 0        |
| SINE          | Alu           | B1_Mm   | chr6  | 76096400 76096537 - | 0        | 0        | 0        |
| SINE          | Alu           | B1_Mm   | chr6  | 76360814 76360958 - | 0        | 0        | 0        |
| SINE          | Alu           | B1_Mus1 | chr6  | 77947778 77947902 - | 0        | 0        | 0        |
| SINE          | Alu           | B1_Mm   | chr6  | 78036656 78036801 + | 0        | 0.380568 | 0        |
| Simple_repeat | Simple_repeat | (A)n    | chr6  | 78036802 78036844 + | 0        | 0        | 0        |
| LTR           | MaLR          | MTA_Mm  | chr10 | 23627364 23627758 + | 0        | 0        | 0        |
| LINE          | L1            | L1Md_T  | chr6  | 78826365 78832760 - | 0        | 0        | 0        |
| Simple_repeat | Simple_repeat | (A)n    | chr6  | 78991474 78991510 + | 0        | 0        | 0.342623 |
| Simple_repeat | Simple_repeat | (A)n    | chr6  | 79083948 79083989 + | 0        | 0        | 0        |
| Simple_repeat | Simple_repeat | (A)n    | chr6  | 79084052 79084088 + | 0        | 0        | 0        |
| SINE          | Alu           | B1_Mm   | chr6  | 79523318 79523464 + | 0        | 0        | 0        |
| SINE          | Alu           | B1_Mus2 | chr6  | 80167517 80167663 + | 0        | 0        | 0        |
| Simple_repeat | Simple_repeat | (A)n    | chr6  | 80167664 80167713 + | 0        | 0        | 0        |
| Simple_repeat | Simple_repeat | (TTTA)n | chr6  | 80341790 80341820 + | 0        | 0        | 0        |
| SINE          | Alu           | B1_Mus2 | chr6  | 81175839 81175984 + | 0        | 0        | 0        |
| Simple_repeat | Simple_repeat | (A)n    | chr6  | 81175985 81176013 + | 0        | 0        | 0        |
| LTR           | MaLR          | MTA_Mm  | chr6  | 81440105 81440498 + | 0        | 0        | 0        |
| Simple_repeat | Simple_repeat | (A)n    | chr6  | 81705715 81705746 + | 0        | 0        | 0        |

|               |               |         |       |                     |          |          |          |
|---------------|---------------|---------|-------|---------------------|----------|----------|----------|
| Simple_repeat | Simple_repeat | (A)n    | chr6  | 82566330 82566359 + | 0        | 0        | 0        |
| LTR           | MaLR          | MTA_Mm  | chr6  | 82614424 82614819 - | 0        | 0        | 0        |
| SINE          | Alu           | B1_Mus1 | chr6  | 82618936 82619083 - | 0        | 0        | 0        |
| Simple_repeat | Simple_repeat | (A)n    | chr6  | 83061853 83061901 + | 0.923247 | 0.380568 | 0.342623 |
| SINE          | Alu           | B1_Mm   | chr6  | 83740795 83740941 - | 0        | 0        | 0        |
| SINE          | Alu           | B1_Mm   | chr6  | 83754833 83754978 - | 0        | 0        | 0        |
| SINE          | Alu           | B1_Mur3 | chr6  | 83802926 83803080 + | 0        | 0        | 0        |
| Simple_repeat | Simple_repeat | (A)n    | chr6  | 83803081 83803108 + | 0        | 0        | 0        |
| SINE          | Alu           | B1_Mm   | chr6  | 83810485 83810631 + | 0        | 0        | 0        |
| SINE          | Alu           | B1_Mus1 | chr6  | 85341636 85341782 - | 0        | 0        | 0        |
| SINE          | B2            | B2_Mm1t | chr10 | 23711359 23711550 - | 0        | 0        | 0        |
| SINE          | Alu           | B1_Mus2 | chr6  | 86252188 86252340 - | 0        | 0        | 0        |
| SINE          | Alu           | B1_Mus1 | chr6  | 86471987 86472113 + | 0        | 0        | 0        |
| SINE          | Alu           | B1_Mm   | chr6  | 86780428 86780574 - | 0        | 0        | 0        |
| Simple_repeat | Simple_repeat | (A)n    | chr11 | 68463611 68463665 + | 0        | 0        | 0        |
| SINE          | Alu           | PB1D9   | chr6  | 87892250 87892338 + | 0        | 0        | 0.957947 |
| Simple_repeat | Simple_repeat | (A)n    | chr6  | 87892339 87892362 + | 0        | 0        | 0.957947 |
| SINE          | Alu           | B1_Mus1 | chr6  | 87990743 87990890 + | 0        | 0        | 0        |
| Simple_repeat | Simple_repeat | (A)n    | chr6  | 87990891 87990917 + | 0        | 0        | 0        |
| SINE          | Alu           | B1_Mus2 | chr6  | 88020690 88020835 - | 0        | 0        | 0        |
| SINE          | Alu           | B1_Mm   | chr6  | 88061717 88061862 - | 0        | 0        | 0        |
| SINE          | Alu           | B1_Mm   | chr6  | 88129619 88129765 + | 0        | 0        | 0        |
| Simple_repeat | Simple_repeat | (A)n    | chr6  | 88547940 88547974 + | 0        | 0        | 0        |
| SINE          | Alu           | B1_Mus2 | chr6  | 89042905 89043037 - | 0        | 0        | 0        |
| SINE          | Alu           | B1_Mus1 | chr6  | 89815369 89815515 + | 0        | 0        | 0        |
| Simple_repeat | Simple_repeat | (A)n    | chr6  | 89815516 89815545 + | 0        | 0        | 0        |
| LINE          | L1            | L1Md_T  | chr6  | 89977512 89985872 - | 0        | 0        | 0        |
| SINE          | Alu           | B1_Mm   | chr6  | 90135267 90135414 + | 0        | 0        | 0        |
| SINE          | Alu           | B1_Mus2 | chr6  | 90466671 90466817 - | 0        | 0        | 0        |
| SINE          | Alu           | B1_Mur4 | chr6  | 91255915 91256064 + | 0        | 0        | 0        |
| Simple_repeat | Simple_repeat | (A)n    | chr6  | 91256065 91256126 + | 0        | 0        | 0        |
| SINE          | Alu           | B1_Mur2 | chr6  | 91497608 91497747 - | 0        | 0        | 0        |
| SINE          | B2            | B2_Mm1a | chr6  | 91614161 91614353 + | 0        | 0        | 0        |
| Simple_repeat | Simple_repeat | (A)n    | chr6  | 91614354 91614376 + | 0        | 0        | 0        |
| SINE          | Alu           | B1_Mus1 | chr6  | 92185718 92185855 - | 0        | 0        | 0        |
| SINE          | Alu           | B1_Mus2 | chr6  | 92201391 92201537 - | 0        | 0        | 0        |
| Simple_repeat | Simple_repeat | (TTTA)n | chr10 | 23804521 23804555 + | 0        | 0        | 0        |
| Simple_repeat | Simple_repeat | (A)n    | chr6  | 92678055 92678091 + | 0        | 0        | 0        |
| Simple_repeat | Simple_repeat | (A)n    | chr6  | 92681757 92681811 + | 0        | 0        | 0        |
| SINE          | Alu           | B1_Mm   | chr6  | 93186804 93186956 + | 0        | 0.708814 | 1.23065  |
| Simple_repeat | Simple_repeat | (A)n    | chr6  | 93186957 93186982 + | 0        | 0.708814 | 1.23065  |
| SINE          | B2            | B2_Mm1a | chr6  | 93502380 93502572 + | 0        | 0        | 0        |
| Simple_repeat | Simple_repeat | (A)n    | chr6  | 93502573 93502604 + | 0        | 0.380568 | 0.957947 |
| Simple_repeat | Simple_repeat | (A)n    | chr11 | 68892677 68892714 + | 0.827951 | 0        | 0        |
| SINE          | Alu           | B1_Mus2 | chr6  | 94945418 94945564 - | 0        | 0        | 0        |
| SINE          | Alu           | B1_Mus1 | chr11 | 69109954 69110096 - | 0.591053 | 0.708814 | 0        |
| Simple_repeat | Simple_repeat | (A)n    | chr6  | 98012029 98012066 + | 0        | 0        | 0        |
| LTR           | MaLR          | MTA_Mm  | chr6  | 98175900 98176294 - | 0        | 0        | 0        |
| LTR           | MaLR          | MTA_Mm  | chr6  | 98177393 98177787 - | 0        | 0        | 0        |
| LTR           | MaLR          | MTA_Mm  | chr6  | 98621425 98621825 - | 0        | 0        | 0        |
| SINE          | Alu           | B1_Mm   | chr6  | 98846898 98847044 - | 0        | 0        | 0        |
| SINE          | Alu           | B1_Mm   | chr6  | 98858129 98858273 - | 0        | 0        | 0        |
| SINE          | Alu           | B1_Mm   | chr6  | 98863383 98863508 - | 0        | 0.380568 | 0.342623 |
| SINE          | B2            | B2_Mm1a | chr6  | 98863539 98863731 + | 0        | 0        | 0        |
| Simple_repeat | Simple_repeat | (A)n    | chr6  | 98863732 98863756 + | 0        | 0.380568 | 0.342623 |
| SINE          | Alu           | B1_Mm   | chr6  | 99422805 99422947 - | 1.18211  | 0.761137 | 0        |
| SINE          | Alu           | B1_Mus2 | chr6  | 10030843 10030855 - | 0        | 0        | 0        |
| Simple_repeat | Simple_repeat | (A)n    | chr6  | 10030918 10030923 + | 0.332194 | 0        | 0        |
| SINE          | Alu           | B1_Mm   | chr6  | 10031023 10031035 - | 0        | 0        | 0        |
| Simple_repeat | Simple_repeat | (A)n    | chr6  | 10037433 10037436 + | 0        | 0        | 0        |
| Simple_repeat | Simple_repeat | (A)n    | chr11 | 69445885 69445909 + | 0        | 0        | 0        |
| LTR           | MaLR          | MTA_Mm  | chr6  | 10278848 10278887 + | 0        | 0        | 0        |
| SINE          | Alu           | B1_Mm   | chr6  | 10292689 10292703 + | 0        | 0        | 0        |
| Simple_repeat | Simple_repeat | (A)n    | chr6  | 10292704 10292706 + | 0        | 0        | 0        |
| Simple_repeat | Simple_repeat | (A)n    | chr6  | 10302296 10302300 + | 0        | 0        | 0        |
| LTR           | MaLR          | MTA_Mm  | chr6  | 10309917 10309955 + | 0        | 0        | 0        |
| LTR           | MaLR          | MTA_Mm  | chr6  | 10310064 10310103 + | 0        | 0        | 0        |

|                |                |         |       |          |          |   |         |          |          |
|----------------|----------------|---------|-------|----------|----------|---|---------|----------|----------|
| SINE           | Alu            | B1_Mus2 | chr6  | 10368402 | 10368417 | - | 0       | 0        | 0        |
| LINE           | L1             | L1Md_T  | chr6  | 10420707 | 10421441 | - | 0       | 0        | 0        |
| Simple_repeat  | Simple_repeat  | (A)n    | chr6  | 10436064 | 10436066 | + | 0       | 0        | 0        |
| LINE           | L1             | L1_Mus2 | chr6  | 10486022 | 10486490 | - | 0       | 0        | 0        |
| LINE           | L1             | L1Md_A  | chr6  | 10502225 | 10502864 | - | 0       | 0        | 0        |
| Simple_repeat  | Simple_repeat  | (A)n    | chr6  | 10544963 | 10544967 | + | 0       | 0        | 0        |
| SINE           | Alu            | B1_Mus1 | chr6  | 10758054 | 10758069 | + | 0       | 0        | 0        |
| Simple_repeat  | Simple_repeat  | (A)n    | chr6  | 10758069 | 10758073 | + | 0       | 0        | 0        |
| LINE           | L1             | L1Md_T  | chr6  | 10762080 | 10762768 | - | 0       | 0        | 0        |
| Simple_repeat  | Simple_repeat  | (A)n    | chr6  | 10792671 | 10792674 | + | 0       | 0        | 0        |
| Simple_repeat  | Simple_repeat  | (A)n    | chr6  | 10794434 | 10794437 | + | 0       | 0        | 0        |
| SINE           | Alu            | B1_Mus1 | chr6  | 10862940 | 10862954 | + | 0       | 0        | 0        |
| Simple_repeat  | Simple_repeat  | (A)n    | chr6  | 10862955 | 10862957 | + | 0       | 0        | 0        |
| SINE           | Alu            | B1_Mm   | chr6  | 10934899 | 10934908 | + | 0       | 0        | 0        |
| Simple_repeat  | Simple_repeat  | (A)n    | chr6  | 10934908 | 10934911 | + | 0       | 0        | 0        |
| SINE           | Alu            | B1_Mm   | chr6  | 10981118 | 10981133 | + | 0       | 0        | 0        |
| Simple_repeat  | Simple_repeat  | (A)n    | chr6  | 10981133 | 10981136 | + | 0       | 0        | 0        |
| SINE           | Alu            | B1_Mus1 | chr6  | 10989704 | 10989720 | + | 0       | 0        | 0        |
| Simple_repeat  | Simple_repeat  | (A)n    | chr6  | 10989720 | 10989727 | + | 0       | 0        | 0        |
| SINE           | Alu            | B1_Mur1 | chr6  | 11058576 | 11058589 | - | 4.00689 | 1.41763  | 3.07662  |
| SINE           | Alu            | B1_Mm   | chr6  | 11222162 | 11222177 | + | 0       | 0        | 0        |
| Simple_repeat  | Simple_repeat  | (A)n    | chr6  | 11222177 | 11222180 | + | 0       | 0        | 0        |
| LTR            | MaLR           | MTA_Mm  | chr6  | 11248245 | 11248284 | - | 0       | 0        | 0        |
| SINE           | Alu            | B1_Mus2 | chr10 | 24044488 | 24044632 | + | 0       | 0        | 0        |
| SINE           | Alu            | B1_Mm   | chr6  | 11297670 | 11297685 | - | 0       | 0        | 0        |
| Simple_repeat  | Simple_repeat  | (GAA)n  | chr10 | 24044633 | 24044730 | + | 0       | 0        | 0.342623 |
| Simple_repeat  | Simple_repeat  | (A)n    | chr6  | 11315641 | 11315644 | + | 0       | 0        | 0        |
| Simple_repeat  | Simple_repeat  | (A)n    | chr6  | 11338872 | 11338875 | + | 0       | 0        | 0        |
| Simple_repeat  | Simple_repeat  | (A)n    | chr11 | 70245551 | 70245585 | + | 0       | 0        | 0        |
| SINE           | Alu            | B1_Mus2 | chr6  | 11358601 | 11358616 | + | 0       | 0        | 0        |
| Simple_repeat  | Simple_repeat  | (A)n    | chr6  | 11358616 | 11358619 | + | 0       | 0        | 0        |
| SINE           | Alu            | B1_Mus1 | chr6  | 11366335 | 11366350 | + | 0       | 0        | 0        |
| Simple_repeat  | Simple_repeat  | (A)n    | chr6  | 11366350 | 11366353 | + | 0       | 0        | 0        |
| LTR            | ERVL           | RLTR28  | chr6  | 11434381 | 11434435 | - | 0       | 0        | 0        |
| SINE           | Alu            | B1_Mus2 | chr11 | 70337152 | 70337298 | - | 0       | 0        | 0        |
| Simple_repeat  | Simple_repeat  | (TTTA)n | chr6  | 11499446 | 11499449 | + | 0       | 0        | 0        |
| Simple_repeat  | Simple_repeat  | (A)n    | chr6  | 11526309 | 11526312 | + | 0       | 0        | 0        |
| SINE           | Alu            | B1_Mus1 | chr6  | 11544149 | 11544164 | - | 0       | 0        | 0        |
| SINE           | Alu            | B1_Mm   | chr6  | 11670711 | 11670724 | + | 0       | 0        | 0        |
| Simple_repeat  | Simple_repeat  | (A)n    | chr6  | 11670724 | 11670726 | + | 0       | 0        | 0        |
| SINE           | Alu            | B1_Mus2 | chr6  | 11678840 | 11678854 | - | 0       | 0        | 0        |
| Low_complexity | Low_complexity | AT_rich | chr6  | 11704431 | 11704435 | + | 0       | 0        | 0        |
| LTR            | MaLR           | MTA_Mm  | chr6  | 11770437 | 11770476 | - | 0       | 0        | 0        |
| SINE           | Alu            | B1_Mus2 | chr6  | 11777948 | 11777963 | - | 0       | 0        | 0        |
| LTR            | MaLR           | MTE2b   | chr6  | 11778729 | 11778760 | - | 0       | 0        | 0        |
| SINE           | Alu            | B1_Mm   | chr11 | 70566596 | 70566742 | - | 0       | 0        | 0        |
| LINE           | L1             | L1Md_T  | chr6  | 11815915 | 11816580 | - | 0       | 0        | 0        |
| SINE           | Alu            | B1_Mus2 | chr11 | 70652637 | 70652782 | + | 0       | 0        | 0        |
| Simple_repeat  | Simple_repeat  | (A)n    | chr11 | 70652783 | 70652840 | + | 0       | 0        | 0        |
| SINE           | Alu            | B1_Mus1 | chr6  | 12053471 | 12053486 | + | 0       | 0        | 0        |
| SINE           | Alu            | B1_Mus2 | chr6  | 12053989 | 12054004 | + | 0       | 0        | 0        |
| Simple_repeat  | Simple_repeat  | (A)n    | chr6  | 12054004 | 12054006 | + | 0       | 0        | 0        |
| SINE           | Alu            | B1_Mus2 | chr6  | 12078380 | 12078394 | + | 0       | 0        | 0        |
| Simple_repeat  | Simple_repeat  | (A)n    | chr6  | 12078394 | 12078397 | + | 0       | 0        | 0        |
| SINE           | Alu            | B1_Mus1 | chr6  | 12275385 | 12275397 | - | 0       | 0        | 0        |
| LINE           | L1             | L1_Mus3 | chr6  | 12385252 | 12385662 | - | 0       | 0        | 0        |
| SINE           | Alu            | B1_Mus2 | chr6  | 12434529 | 12434543 | - | 0       | 0        | 0.615324 |
| LTR            | MaLR           | MTC     | chr6  | 12443900 | 12443937 | - | 0       | 0        | 0        |
| SINE           | Alu            | B1_Mus2 | chr6  | 12453980 | 12453994 | - | 0       | 0        | 0        |
| SINE           | Alu            | B1_Mm   | chr6  | 12489692 | 12489706 | + | 0       | 0.380568 | 0        |
| Simple_repeat  | Simple_repeat  | (A)n    | chr6  | 12489706 | 12489708 | + | 0       | 0.380568 | 0        |
| SINE           | Alu            | B1_Mus2 | chr6  | 12515480 | 12515495 | - | 0       | 0        | 0        |
| SINE           | Alu            | B1_Mus1 | chr6  | 12524812 | 12524826 | - | 0       | 0        | 0        |
| SINE           | Alu            | B1_Mus1 | chr6  | 12538431 | 12538444 | - | 0       | 0        | 0        |
| SINE           | Alu            | B1_Mus2 | chr6  | 12539659 | 12539673 | + | 0       | 0        | 0        |
| Simple_repeat  | Simple_repeat  | (A)n    | chr6  | 12539673 | 12539676 | + | 0       | 0        | 0        |
| SINE           | Alu            | B1_Mus2 | chr6  | 12692578 | 12692593 | - | 0       | 0.708814 | 0        |



|                |                |         |       |          |            |          |          |          |
|----------------|----------------|---------|-------|----------|------------|----------|----------|----------|
| SINE           | Alu            | B1_Mm   | chr6  | 12707422 | 12707437 + | 0        | 0.708814 | 0        |
| Simple_repeat  | Simple_repeat  | (A)n    | chr6  | 12720783 | 12720785 + | 0        | 0        | 0        |
| SINE           | B2             | B3      | chr6  | 12747352 | 12747373 + | 0        | 0        | 0        |
| Simple_repeat  | Simple_repeat  | (A)n    | chr6  | 12747373 | 12747377 + | 0        | 0        | 0        |
| SINE           | Alu            | B1_Mm   | chr6  | 12781264 | 12781279 + | 0        | 0        | 0        |
| Simple_repeat  | Simple_repeat  | (A)n    | chr6  | 12781279 | 12781281 + | 0        | 0        | 0        |
| LTR            | MaLR           | MTA_Mm  | chr6  | 12929249 | 12929288 + | 0        | 0        | 0        |
| SINE           | Alu            | B1_Mur4 | chr6  | 12948073 | 12948088 + | 0        | 0        | 0        |
| Low_complexity | Low_complexity | A-rich  | chr6  | 12948088 | 12948093 + | 0        | 0        | 0        |
| SINE           | Alu            | B1_Mus2 | chr6  | 12951819 | 12951833 + | 0        | 0        | 0        |
| Simple_repeat  | Simple_repeat  | (A)n    | chr6  | 12951833 | 12951836 + | 0        | 0        | 0        |
| Low_complexity | Low_complexity | A-rich  | chr6  | 12963208 | 12963217 + | 0        | 0        | 0        |
| SINE           | Alu            | B1_Mus2 | chr6  | 13104694 | 13104709 + | 0        | 0        | 0        |
| Simple_repeat  | Simple_repeat  | (A)n    | chr6  | 13144071 | 13144074 + | 0        | 0        | 0        |
| Simple_repeat  | Simple_repeat  | (A)n    | chr6  | 13153949 | 13153953 + | 0        | 0        | 0        |
| SINE           | Alu            | B1_Mus2 | chr6  | 13241693 | 13241708 - | 0        | 0        | 0        |
| Simple_repeat  | Simple_repeat  | (A)n    | chr6  | 13254354 | 13254357 + | 0        | 0        | 0        |
| LINE           | L1             | L1Md_T  | chr6  | 13256515 | 13257073 - | 0        | 0        | 0        |
| Simple_repeat  | Simple_repeat  | (A)n    | chr6  | 13284758 | 13284761 + | 0        | 0        | 0        |
| SINE           | Alu            | B1_Mm   | chr6  | 13324141 | 13324156 + | 0        | 0        | 0        |
| Simple_repeat  | Simple_repeat  | (A)n    | chr6  | 13324156 | 13324163 + | 0        | 0        | 0        |
| Simple_repeat  | Simple_repeat  | (TTTA)n | chr6  | 13388129 | 13388134 + | 0        | 0        | 0        |
| SINE           | Alu            | B1_Mm   | chr6  | 13474556 | 13474570 - | 0        | 0        | 0        |
| Simple_repeat  | Simple_repeat  | (A)n    | chr6  | 13492149 | 13492152 + | 0        | 0        | 0        |
| SINE           | Alu            | PB1D10  | chr6  | 13521964 | 13521975 - | 0        | 0        | 0        |
| SINE           | Alu            | B1_Mm   | chr6  | 13615474 | 13615486 + | 0        | 0        | 0        |
| Simple_repeat  | Simple_repeat  | (A)n    | chr6  | 13615486 | 13615489 + | 0        | 0        | 0        |
| SINE           | B2             | B2_Mm1a | chr6  | 13631667 | 13631686 + | 0        | 0.708814 | 0        |
| LTR            | MaLR           | MTA_Mm  | chr6  | 13820846 | 13820885 - | 0        | 0        | 0        |
| Simple_repeat  | Simple_repeat  | (A)n    | chr6  | 13872260 | 13872263 + | 0        | 0        | 0        |
| Simple_repeat  | Simple_repeat  | (A)n    | chr6  | 13905718 | 13905721 + | 0        | 0        | 0        |
| SINE           | Alu            | PB1D7   | chr6  | 14304901 | 14304913 + | 0        | 0        | 0        |
| Simple_repeat  | Simple_repeat  | (A)n    | chr6  | 14304913 | 14304918 + | 0        | 0        | 0        |
| SINE           | Alu            | B1_Mm   | chr6  | 14309042 | 14309056 + | 0        | 0        | 0        |
| Simple_repeat  | Simple_repeat  | (A)n    | chr6  | 14309056 | 14309059 + | 0        | 0        | 0        |
| SINE           | Alu            | B1_Mus2 | chr6  | 14309980 | 14309995 + | 0        | 0        | 0        |
| Low_complexity | Low_complexity | A-rich  | chr6  | 14309995 | 14310003 + | 0        | 0        | 0        |
| SINE           | Alu            | B1_Mus1 | chr6  | 14311420 | 14311435 - | 0        | 0        | 0        |
| SINE           | Alu            | B1_Mur3 | chr6  | 14456418 | 14456433 - | 0        | 0        | 0        |
| SINE           | Alu            | B1_Mur4 | chr11 | 72966069 | 72966205 - | 0        | 0        | 0        |
| Simple_repeat  | Simple_repeat  | (A)n    | chr6  | 14564588 | 14564590 + | 0        | 0        | 0        |
| LTR            | MaLR           | MTB     | chr6  | 14594302 | 14594342 - | 0.332194 | 0        | 0        |
| SINE           | Alu            | B1_Mus1 | chr6  | 14663575 | 14663587 - | 0.332194 | 0        | 0        |
| SINE           | Alu            | B1_Mus1 | chr11 | 73141557 | 73141703 - | 0        | 0        | 0        |
| LTR            | MaLR           | MTA_Mm  | chr6  | 14861150 | 14861189 - | 0        | 0        | 0        |
| LTR            | MaLR           | MTA_Mm  | chr6  | 14861298 | 14861337 - | 0        | 0        | 0        |
| Simple_repeat  | Simple_repeat  | (A)n    | chr6  | 14889687 | 14889691 + | 0.591053 | 0        | 0        |
| SINE           | Alu            | B1_Mus1 | chr6  | 14892199 | 14892214 + | 0        | 0        | 0        |
| Simple_repeat  | Simple_repeat  | (A)n    | chr6  | 14892214 | 14892216 + | 0        | 0        | 0        |
| SINE           | Alu            | B1_Mm   | chr6  | 14922941 | 14922955 - | 0        | 0        | 0        |
| SINE           | B2             | B2_Mm1t | chr6  | 14932651 | 14932670 + | 0        | 0        | 0        |
| Simple_repeat  | Simple_repeat  | (A)n    | chr6  | 14932671 | 14932673 + | 0        | 0        | 0        |
| SINE           | Alu            | B1_Mus1 | chr7  | 3199359  | 3199500 -  | 0        | 0        | 0        |
| SINE           | Alu            | B1_Mus2 | chr7  | 3205507  | 3205653 -  | 0        | 0        | 0        |
| SINE           | Alu            | B1_Mus2 | chr7  | 3211949  | 3212068 -  | 0        | 0        | 0        |
| SINE           | Alu            | B1_Mus1 | chr7  | 3273079  | 3273220 +  | 0        | 0        | 0        |
| Simple_repeat  | Simple_repeat  | (A)n    | chr7  | 3273221  | 3273243 +  | 0        | 0        | 0        |
| LTR            | MaLR           | MTA_Mm  | chr7  | 3710429  | 3710825 +  | 0.332194 | 0        | 0        |
| LTR            | MaLR           | MTA_Mm  | chr7  | 3770490  | 3770884 +  | 0        | 0        | 0        |
| LINE           | L1             | L1Md_T  | chr7  | 4137820  | 4144724 -  | 0        | 0        | 0.342623 |
| LTR            | MaLR           | MTA_Mm  | chr7  | 4933547  | 4933886 -  | 0        | 0        | 0        |
| SINE           | Alu            | B1_Mm   | chr7  | 4971391  | 4971537 +  | 0.332194 | 0        | 0        |
| Simple_repeat  | Simple_repeat  | (A)n    | chr7  | 4971538  | 4971560 +  | 0.332194 | 0        | 0        |
| LINE           | L1             | L1_Mus3 | chr7  | 5371037  | 5376288 -  | 0        | 0        | 0        |
| SINE           | Alu            | B1_Mus2 | chr7  | 6118645  | 6118791 +  | 0        | 0        | 0.615324 |
| Simple_repeat  | Simple_repeat  | (A)n    | chr7  | 6296486  | 6296514 +  | 0        | 0        | 0        |
| SINE           | Alu            | B1_Mm   | chr11 | 74172177 | 74172323 - | 0        | 0        | 0        |

|               |               |            |       |          |          |   |          |          |          |
|---------------|---------------|------------|-------|----------|----------|---|----------|----------|----------|
| SINE          | Alu           | B1_Mm      | chr7  | 7009411  | 7009543  | - | 0        | 0        | 0        |
| Simple_repeat | Simple_repeat | (A)n       | chr7  | 7458415  | 7458451  | + | 0        | 0        | 0        |
| Simple_repeat | Simple_repeat | (A)n       | chr7  | 8002903  | 8002941  | + | 0        | 0        | 0        |
| LINE          | L1            | L1Md_F2    | chr7  | 9051349  | 9056456  | - | 0        | 0        | 0        |
| LINE          | L1            | L1Md_F2    | chr7  | 9342690  | 9347717  | + | 0        | 0        | 0        |
| LINE          | L1            | L1Md_F2    | chr7  | 9709170  | 9714277  | - | 0        | 0        | 0        |
| LTR           | MaLR          | MTA_Mm-int | chr7  | 10789210 | 10790414 | + | 0        | 0        | 0        |
| SINE          | Alu           | B1_Mus1    | chr11 | 74420400 | 74420547 | + | 0        | 0        | 0        |
| Simple_repeat | Simple_repeat | (A)n       | chr11 | 74420548 | 74420569 | + | 0.332194 | 0        | 0        |
| LTR           | MaLR          | MTA_Mm     | chr11 | 74421947 | 74422327 | - | 0        | 0        | 0        |
| Simple_repeat | Simple_repeat | (A)n       | chr7  | 11492226 | 11492278 | + | 0        | 0        | 0        |
| Simple_repeat | Simple_repeat | (A)n       | chr7  | 11897855 | 11897893 | + | 0        | 0        | 0        |
| SINE          | Alu           | B1_Mus1    | chr7  | 13505882 | 13506029 | - | 0.591053 | 0        | 0.615324 |
| SINE          | Alu           | B1_Mus2    | chr7  | 13537061 | 13537207 | - | 0.591053 | 0        | 0        |
| SINE          | Alu           | B1_Mm      | chr7  | 13654283 | 13654429 | - | 0        | 0        | 0        |
| SINE          | Alu           | B1_Mur4    | chr11 | 74569355 | 74569494 | - | 0        | 0        | 0        |
| LINE          | L1            | L1Md_A     | chr7  | 14001064 | 14007285 | - | 0.332194 | 0        | 0        |
| SINE          | Alu           | B1_Mm      | chr10 | 24560456 | 24560600 | - | 0        | 0        | 0        |
| LTR           | MaLR          | MTA_Mm     | chr7  | 15221308 | 15221703 | - | 0.591053 | 0        | 0        |
| LTR           | MaLR          | MTA_Mm     | chr7  | 15222799 | 15223194 | - | 0        | 0        | 0        |
| Simple_repeat | Simple_repeat | (A)n       | chr7  | 15550974 | 15551023 | + | 0        | 0        | 0        |
| Simple_repeat | Simple_repeat | (A)n       | chr7  | 16652918 | 16652958 | + | 0        | 0        | 0        |
| SINE          | Alu           | B1_Mur4    | chr7  | 17346033 | 17346175 | + | 0        | 0        | 0.615324 |
| Simple_repeat | Simple_repeat | (A)n       | chr7  | 17346176 | 17346205 | + | 0        | 0        | 0        |
| LTR           | MaLR          | MTB        | chr7  | 17511449 | 17511846 | - | 0        | 0        | 0        |
| SINE          | Alu           | B1_Mus2    | chr7  | 17541457 | 17541580 | - | 0        | 0        | 0        |
| LTR           | MaLR          | MTA_Mm     | chr7  | 18373381 | 18373776 | + | 0        | 0        | 0        |
| SINE          | Alu           | B1_Mm      | chr7  | 19339092 | 19339247 | + | 0        | 0        | 0        |
| Simple_repeat | Simple_repeat | (TTTA)n    | chr7  | 19500050 | 19500079 | + | 0        | 0        | 0        |
| SINE          | Alu           | B1_Mus2    | chr7  | 19833492 | 19833636 | + | 1.18211  | 0        | 1.23065  |
| SINE          | Alu           | B1_Mm      | chr11 | 74988037 | 74988189 | + | 3.0286   | 1.08938  | 0.957947 |
| Simple_repeat | Simple_repeat | (A)n       | chr11 | 74988190 | 74988240 | + | 3.28746  | 0.708814 | 0.685246 |
| Simple_repeat | Simple_repeat | (TTTA)n    | chr7  | 20522015 | 20522044 | + | 0        | 0        | 0        |
| LINE          | L1            | L1Md_F2    | chr7  | 20794688 | 20799926 | + | 0        | 0        | 0.342623 |
| SINE          | Alu           | B1_Mm      | chr11 | 75109298 | 75109449 | - | 0        | 0        | 0        |
| LINE          | L1            | L1Md_F2    | chr7  | 21267808 | 21273041 | + | 0        | 0        | 0        |
| LINE          | L1            | L1Md_F2    | chr7  | 21467477 | 21472711 | + | 0        | 0        | 0        |
| LINE          | L1            | L1Md_F2    | chr7  | 21672872 | 21678098 | + | 0        | 0        | 0        |
| LINE          | L1            | L1Md_F2    | chr7  | 22310342 | 22315572 | + | 0        | 0        | 0        |
| LINE          | L1            | L1Md_F2    | chr7  | 22793149 | 22798379 | + | 0        | 0        | 0        |
| LINE          | L1            | L1Md_F2    | chr7  | 22990015 | 22995258 | + | 0        | 0        | 0        |
| LINE          | L1            | L1Md_F2    | chr7  | 23456574 | 23461810 | + | 0        | 0        | 0        |
| LTR           | MaLR          | MTA_Mm     | chr7  | 24557633 | 24558027 | + | 0        | 0        | 0        |
| Simple_repeat | Simple_repeat | (A)n       | chr7  | 25680898 | 25680918 | + | 0        | 0        | 0        |
| SINE          | Alu           | B1_Mm      | chr7  | 26158697 | 26158843 | + | 0        | 0        | 0        |
| Simple_repeat | Simple_repeat | (A)n       | chr7  | 26158844 | 26158877 | + | 0        | 0        | 0        |
| Simple_repeat | Simple_repeat | (A)n       | chr7  | 26402309 | 26402342 | + | 0        | 0        | 0        |
| SINE          | Alu           | B1_Mus2    | chr7  | 26462393 | 26462539 | + | 0        | 0        | 0        |
| Simple_repeat | Simple_repeat | (A)n       | chr7  | 26462540 | 26462583 | + | 0        | 0.708814 | 0        |
| Simple_repeat | Simple_repeat | (A)n       | chr11 | 75524658 | 75524687 | + | 0        | 0        | 0        |
| SINE          | Alu           | B1_Mus2    | chr11 | 75530419 | 75530547 | - | 0        | 0        | 0        |
| SINE          | Alu           | B1_Mus2    | chr7  | 27935981 | 27936138 | + | 0        | 0        | 0        |
| SINE          | Alu           | B1_Mus2    | chr7  | 28372272 | 28372409 | + | 0        | 0        | 0        |
| Simple_repeat | Simple_repeat | (A)n       | chr7  | 28372410 | 28372432 | + | 0        | 0        | 0        |
| SINE          | Alu           | B1_Mm      | chr7  | 28434546 | 28434692 | - | 0        | 0        | 0        |
| SINE          | Alu           | B1_Mus1    | chr7  | 28512030 | 28512174 | + | 0        | 0        | 0        |
| SINE          | Alu           | B1_Mus2    | chr7  | 28590471 | 28590617 | - | 0        | 0        | 0        |
| SINE          | Alu           | B1_Mus2    | chr7  | 28670184 | 28670330 | - | 0        | 0        | 0        |
| SINE          | Alu           | B1_Mus1    | chr7  | 28802318 | 28802463 | - | 0        | 0        | 0        |
| LTR           | MaLR          | MTB_Mm     | chr7  | 29060036 | 29060441 | + | 0.591053 | 0.708814 | 0        |
| SINE          | Alu           | B1_Mm      | chr7  | 29618160 | 29618307 | - | 0        | 0        | 0        |
| SINE          | Alu           | B1_Mus1    | chr7  | 29653004 | 29653150 | + | 0        | 0        | 0        |
| Simple_repeat | Simple_repeat | (A)n       | chr7  | 29653151 | 29653199 | + | 0        | 0        | 0        |
| SINE          | Alu           | B1_Mm      | chr7  | 29665026 | 29665171 | + | 0        | 0        | 0.342623 |
| Simple_repeat | Simple_repeat | (A)n       | chr7  | 29665172 | 29665197 | + | 0        | 0        | 0.342623 |
| SINE          | Alu           | B1_Mus1    | chr7  | 30546327 | 30546473 | + | 0        | 0        | 0        |
| Simple_repeat | Simple_repeat | (A)n       | chr7  | 30752202 | 30752227 | + | 0        | 0        | 0        |

|                |                |         |       |                     |          |          |          |
|----------------|----------------|---------|-------|---------------------|----------|----------|----------|
| SINE           | Alu            | B1_Mus2 | chr7  | 31170101 31170247 + | 0        | 0        | 0        |
| Simple_repeat  | Simple_repeat  | (A)n    | chr7  | 31170248 31170274 + | 0        | 0        | 0        |
| SINE           | Alu            | B1_Mus2 | chr7  | 31594575 31594720 + | 0        | 0        | 0        |
| Simple_repeat  | Simple_repeat  | (A)n    | chr7  | 31594721 31594748 + | 0        | 0        | 0        |
| LTR            | MaLR           | MTA_Mm  | chr7  | 31780211 31780600 - | 0        | 0        | 0        |
| LTR            | MaLR           | MTA_Mm  | chr7  | 32771122 32771514 + | 0        | 0        | 0        |
| LINE           | L1             | L1Md_A  | chr7  | 32908219 32914554 - | 0        | 0        | 0        |
| Simple_repeat  | Simple_repeat  | (A)n    | chr7  | 33062185 33062237 + | 0        | 0        | 0        |
| Simple_repeat  | Simple_repeat  | (A)n    | chr7  | 33089312 33089337 + | 0        | 0        | 0        |
| LINE           | L1             | L1_Mus1 | chr7  | 33380908 33387196 - | 0        | 0        | 0        |
| LTR            | MaLR           | MTA_Mm  | chr7  | 33503462 33503854 + | 0        | 0        | 0        |
| LTR            | MaLR           | MTA_Mm  | chr7  | 33730357 33730749 + | 0        | 0        | 0        |
| LINE           | L1             | L1Md_F2 | chr7  | 34321163 34326357 + | 0        | 0        | 0        |
| LINE           | L1             | L1Md_T  | chr7  | 34734480 34741392 - | 0        | 0        | 0        |
| SINE           | Alu            | B1_Mus2 | chr7  | 34924902 34925048 + | 0        | 0        | 0        |
| SINE           | Alu            | B1_Mus1 | chr7  | 35413993 35414138 - | 0        | 0        | 0        |
| SINE           | Alu            | B1_Mus1 | chr7  | 35446467 35446621 + | 0        | 0        | 0        |
| Simple_repeat  | Simple_repeat  | (A)n    | chr7  | 35446622 35446665 + | 0        | 0        | 0        |
| SINE           | Alu            | B1_Mm   | chr7  | 35642870 35643016 - | 0        | 0        | 0        |
| Simple_repeat  | Simple_repeat  | (A)n    | chr7  | 35695657 35695691 + | 0        | 0        | 0        |
| SINE           | Alu            | B1_Mm   | chr7  | 36015181 36015327 + | 0        | 0        | 0        |
| Simple_repeat  | Simple_repeat  | (A)n    | chr7  | 36015328 36015393 + | 0        | 0        | 0        |
| SINE           | B2             | B2_Mm1a | chr7  | 36111336 36111528 - | 0        | 0        | 0        |
| SINE           | Alu            | B1_Mus1 | chr7  | 36113264 36113410 - | 0        | 0        | 0        |
| SINE           | Alu            | B1_Mus2 | chr7  | 36554612 36554758 + | 0        | 0        | 0        |
| Simple_repeat  | Simple_repeat  | (A)n    | chr7  | 36554759 36554782 + | 0        | 0        | 0        |
| scRNA          | scRNA          | BC1_Mm  | chr7  | 37472719 37472839 + | 0        | 0        | 0        |
| SINE           | Alu            | B1_Mus1 | chr7  | 37630675 37630807 + | 0        | 0        | 0        |
| Simple_repeat  | Simple_repeat  | (A)n    | chr7  | 37630808 37630831 + | 0        | 0        | 0        |
| Simple_repeat  | Simple_repeat  | (A)n    | chr7  | 37926735 37926773 + | 0        | 0        | 0        |
| Simple_repeat  | Simple_repeat  | (A)n    | chr7  | 38109583 38109610 + | 0        | 0        | 0        |
| Simple_repeat  | Simple_repeat  | (A)n    | chr7  | 38651313 38651348 + | 0        | 0        | 0        |
| SINE           | Alu            | B1_Mm   | chr7  | 39038123 39038269 + | 0        | 0        | 0        |
| Simple_repeat  | Simple_repeat  | (A)n    | chr7  | 39038270 39038295 + | 0        | 0        | 0        |
| Simple_repeat  | Simple_repeat  | (A)n    | chr7  | 47353807 47353845 + | 0        | 0        | 0        |
| SINE           | Alu            | B1_Mus2 | chr7  | 47674143 47674288 + | 0        | 0        | 0        |
| Low_complexity | Low_complexity | GA-rich | chr7  | 47674289 47674371 + | 0        | 0        | 0        |
| Simple_repeat  | Simple_repeat  | (A)n    | chr7  | 47790412 47790449 + | 0        | 0        | 0        |
| Simple_repeat  | Simple_repeat  | (A)n    | chr7  | 48008895 48008933 + | 0        | 0        | 0        |
| SINE           | B2             | B3A     | chr7  | 48040351 48040540 + | 0        | 0        | 0        |
| SINE           | B2             | B2_Mm1a | chr7  | 48345754 48345957 - | 0        | 0        | 0        |
| Simple_repeat  | Simple_repeat  | (A)n    | chr7  | 48603883 48603917 + | 0        | 0        | 0        |
| Simple_repeat  | Simple_repeat  | (A)n    | chr7  | 48609966 48610013 + | 0        | 0        | 0        |
| Simple_repeat  | Simple_repeat  | (A)n    | chr7  | 48809135 48809157 + | 0        | 0        | 0        |
| SINE           | Alu            | B1_Mm   | chr7  | 48832503 48832649 + | 0        | 0        | 0        |
| Simple_repeat  | Simple_repeat  | (A)n    | chr7  | 48832650 48832683 + | 0        | 0        | 0        |
| LTR            | ERVK           | RLTR18B | chr7  | 48877616 48878136 - | 0        | 0        | 0        |
| LTR            | MaLR           | MTA_Mm  | chr7  | 48914761 48915138 - | 0        | 0        | 0        |
| LTR            | MaLR           | MTA_Mm  | chr7  | 48917451 48917823 - | 0        | 0        | 0        |
| SINE           | Alu            | B1_Mm   | chr11 | 76746128 76746274 - | 0        | 0        | 0        |
| LINE           | L1             | L1Md_F2 | chr7  | 49483419 49488637 + | 0        | 0        | 0        |
| SINE           | Alu            | B1_Mus2 | chr7  | 49733650 49733789 + | 0        | 0        | 0        |
| Simple_repeat  | Simple_repeat  | (A)n    | chr7  | 49733790 49733814 + | 0        | 0        | 0        |
| SINE           | Alu            | B1_Mm   | chr7  | 49845941 49846086 + | 0        | 0        | 0        |
| Simple_repeat  | Simple_repeat  | (A)n    | chr7  | 49846087 49846155 + | 0        | 0        | 0        |
| SINE           | Alu            | B1_Mus2 | chr7  | 50266515 50266663 + | 0.591053 | 0        | 0.342623 |
| Simple_repeat  | Simple_repeat  | (A)n    | chr7  | 50485898 50485934 + | 0        | 0        | 0.342623 |
| SINE           | Alu            | B1_Mm   | chr7  | 50517710 50517855 + | 0        | 0        | 0        |
| SINE           | Alu            | B1_Mm   | chr7  | 50530063 50530176 - | 0        | 0        | 0        |
| SINE           | Alu            | B1_Mm   | chr7  | 50531852 50531997 - | 0        | 0        | 0        |
| SINE           | Alu            | B1_Mm   | chr7  | 50575459 50575604 - | 0        | 0        | 0        |
| SINE           | B2             | B2_Mm1t | chr7  | 50811580 50811772 + | 0        | 0        | 0        |
| Simple_repeat  | Simple_repeat  | (A)n    | chr7  | 50811773 50811794 + | 0        | 0.708814 | 0        |
| SINE           | B2             | B2_Mm1a | chr7  | 50811795 50811987 + | 0        | 0.708814 | 0        |
| Simple_repeat  | Simple_repeat  | (A)n    | chr7  | 50811988 50812024 + | 0        | 0.708814 | 0        |
| SINE           | Alu            | B1_Mus1 | chr7  | 50953689 50953811 + | 0        | 0        | 0        |
| SINE           | Alu            | B1_Mus2 | chr7  | 51550181 51550326 + | 0        | 0        | 0        |

|               |               |         |       |                     |          |          |          |
|---------------|---------------|---------|-------|---------------------|----------|----------|----------|
| Simple_repeat | Simple_repeat | (A)n    | chr7  | 51550327 51550354 + | 0        | 0        | 0.342623 |
| SINE          | Alu           | B1_Mus2 | chr7  | 51737373 51737519 - | 0.591053 | 0.708814 | 0.615324 |
| SINE          | Alu           | B1_Mm   | chr7  | 51935182 51935328 - | 0        | 0        | 0        |
| Simple_repeat | Simple_repeat | (A)n    | chr7  | 52361560 52361590 + | 0        | 0        | 0        |
| SINE          | Alu           | B1_Mm   | chr7  | 52365118 52365243 + | 0        | 0        | 0        |
| Simple_repeat | Simple_repeat | (GAAA)n | chr7  | 52365245 52365336 + | 0        | 0        | 0        |
| SINE          | Alu           | B1_Mm   | chr7  | 52629898 52630034 - | 0.923247 | 0.708814 | 0.615324 |
| SINE          | Alu           | B1_Mus2 | chr7  | 52656209 52656354 - | 0        | 0        | 0        |
| Simple_repeat | Simple_repeat | (A)n    | chr7  | 52867463 52867504 + | 0        | 0        | 0.342623 |
| SINE          | Alu           | B1_Mus2 | chr7  | 53019133 53019277 + | 0        | 0        | 0        |
| SINE          | Alu           | B1_Mus2 | chr7  | 53037139 53037287 + | 0        | 0        | 0        |
| Simple_repeat | Simple_repeat | (A)n    | chr7  | 53037288 53037321 + | 0        | 0        | 0        |
| SINE          | Alu           | B1_Mus2 | chr7  | 54084984 54085130 + | 0        | 0        | 0        |
| Simple_repeat | Simple_repeat | (A)n    | chr7  | 54085131 54085157 + | 0        | 0        | 0        |
| Simple_repeat | Simple_repeat | (A)n    | chr7  | 54136462 54136498 + | 0        | 0        | 0        |
| SINE          | Alu           | B1_Mus1 | chr7  | 55311486 55311629 - | 0        | 0        | 0        |
| LINE          | L1            | L1Md_T  | chr7  | 55553241 55560561 - | 0        | 0        | 0        |
| Simple_repeat | Simple_repeat | (A)n    | chr7  | 55885556 55885591 + | 0.591053 | 0        | 0        |
| Simple_repeat | Simple_repeat | (A)n    | chr7  | 55972511 55972538 + | 0        | 0        | 0        |
| SINE          | Alu           | B1_Mm   | chr7  | 56159738 56159884 + | 0        | 0        | 0        |
| Simple_repeat | Simple_repeat | (A)n    | chr7  | 56159885 56159947 + | 0        | 0        | 0        |
| SINE          | Alu           | B1_Mus2 | chr7  | 56915897 56916026 + | 0        | 0        | 0        |
| Simple_repeat | Simple_repeat | (A)n    | chr7  | 56916027 56916077 + | 0        | 0        | 0        |
| Simple_repeat | Simple_repeat | (A)n    | chr7  | 57229915 57229942 + | 0.923247 | 0        | 0        |
| LTR           | MaLR          | MTA_Mm  | chr7  | 58256476 58256871 + | 0        | 0        | 0        |
| Simple_repeat | Simple_repeat | (A)n    | chr7  | 58262586 58262622 + | 0        | 0        | 0        |
| LTR           | MaLR          | MTA_Mm  | chr7  | 58350268 58350654 - | 0        | 0        | 0        |
| SINE          | Alu           | B1_Mus2 | chr7  | 58415080 58415226 - | 0        | 0        | 0        |
| SINE          | Alu           | B1_Mus1 | chr11 | 77435384 77435526 + | 0        | 0        | 0        |
| Simple_repeat | Simple_repeat | (A)n    | chr11 | 77435527 77435582 + | 0        | 0.380568 | 0        |
| Simple_repeat | Simple_repeat | (A)n    | chr7  | 58931904 58931937 + | 0        | 0        | 0        |
| SINE          | Alu           | B1_Mus1 | chr11 | 77461710 77461847 + | 0        | 0        | 0        |
| Simple_repeat | Simple_repeat | (A)n    | chr11 | 77461848 77461884 + | 0        | 0        | 0        |
| Simple_repeat | Simple_repeat | (A)n    | chr7  | 59339564 59339606 + | 0        | 0        | 0        |
| SINE          | Alu           | B1_Mm   | chr11 | 77483870 77484015 - | 0        | 0        | 0        |
| Simple_repeat | Simple_repeat | (A)n    | chr7  | 60213788 60213814 + | 0        | 0        | 0        |
| SINE          | Alu           | B1_Mus2 | chr7  | 60379635 60379779 - | 0        | 0        | 0        |
| LINE          | L1            | L1Md_F3 | chr7  | 60463731 60469337 - | 0        | 0        | 0        |
| Simple_repeat | Simple_repeat | (A)n    | chr7  | 61562308 61562356 + | 0        | 0        | 0        |
| Simple_repeat | Simple_repeat | (A)n    | chr7  | 62786236 62786277 + | 0        | 0        | 0        |
| SINE          | Alu           | B1_Mus2 | chr11 | 77692794 77692941 + | 0        | 0        | 0        |
| Simple_repeat | Simple_repeat | (A)n    | chr11 | 77692942 77692967 + | 0        | 0        | 0        |
| LINE          | L1            | L1Md_T  | chr7  | 65490466 65497395 - | 0        | 0        | 0        |
| SINE          | Alu           | B1_Mus2 | chr7  | 65537904 65538050 - | 0        | 0        | 0        |
| SINE          | Alu           | B1_Mus2 | chr7  | 65722804 65722950 + | 0        | 0        | 0        |
| LINE          | L1            | L1Md_F2 | chr7  | 67059151 67063852 + | 0        | 0        | 0        |
| Simple_repeat | Simple_repeat | (A)n    | chr7  | 67308826 67308859 + | 0        | 0        | 0        |
| LTR           | MaLR          | MTA_Mm  | chr7  | 67328544 67328934 - | 0        | 0        | 0.615324 |
| SINE          | Alu           | B1_Mus2 | chr7  | 68186190 68186336 + | 0        | 0        | 0        |
| Simple_repeat | Simple_repeat | (A)n    | chr7  | 68186337 68186426 + | 0        | 0        | 0        |
| LTR           | MaLR          | MTA_Mm  | chr7  | 68290388 68290783 + | 0        | 0        | 0        |
| SINE          | Alu           | B1_Mm   | chr7  | 68370988 68371116 + | 0        | 0        | 0        |
| Simple_repeat | Simple_repeat | (A)n    | chr7  | 68371117 68371157 + | 0        | 0        | 0        |
| Simple_repeat | Simple_repeat | (A)n    | chr7  | 69384160 69384204 + | 0        | 0        | 0        |
| SINE          | Alu           | B1_Mus2 | chr7  | 69801203 69801349 + | 0        | 0        | 0        |
| LTR           | MaLR          | MTA_Mm  | chr7  | 70403602 70403996 + | 0        | 0        | 0        |
| Simple_repeat | Simple_repeat | (A)n    | chr7  | 70587937 70587977 + | 0        | 0        | 0        |
| Simple_repeat | Simple_repeat | (A)n    | chr7  | 71567907 71567949 + | 0        | 0        | 0        |
| SINE          | Alu           | B1_Mus1 | chr7  | 72553500 72553646 - | 0.591053 | 0        | 0        |
| SINE          | Alu           | B1_Mus2 | chr7  | 72650239 72650384 + | 0        | 0        | 0        |
| Simple_repeat | Simple_repeat | (A)n    | chr7  | 72650385 72650419 + | 0        | 0        | 0        |
| Simple_repeat | Simple_repeat | (A)n    | chr7  | 73712584 73712628 + | 0.591053 | 0        | 0        |
| SINE          | Alu           | B1_Mus1 | chr7  | 75967124 75967272 - | 0        | 0        | 0        |
| Simple_repeat | Simple_repeat | (A)n    | chr7  | 76132139 76132183 + | 0        | 0        | 0        |
| Simple_repeat | Simple_repeat | (A)n    | chr7  | 76563883 76563910 + | 0        | 0        | 0        |
| Simple_repeat | Simple_repeat | (A)n    | chr7  | 77274209 77274251 + | 0        | 0        | 0        |
| SINE          | Alu           | B1_Mm   | chr11 | 78530349 78530495 - | 0        | 0        | 0        |

|               |               |               |       |                     |          |          |          |
|---------------|---------------|---------------|-------|---------------------|----------|----------|----------|
| SINE          | Alu           | B1_Mus2       | chr11 | 78533606 78533752 + | 0        | 0        | 0        |
| SINE          | Alu           | B1_Mus1       | chr11 | 78569518 78569664 + | 0        | 0        | 0        |
| Simple_repeat | Simple_repeat | (A)n          | chr11 | 78569665 78569692 + | 0        | 0        | 0        |
| Simple_repeat | Simple_repeat | (A)n          | chr7  | 78289934 78289985 + | 0        | 0        | 0        |
| LTR           | MaLR          | MTB_Mm        | chr11 | 78590213 78590540 + | 0        | 0        | 0        |
| SINE          | Alu           | B1_Mm         | chr7  | 78714528 78714674 + | 0        | 0        | 0        |
| Simple_repeat | Simple_repeat | (A)n          | chr7  | 78714675 78714704 + | 0        | 0        | 0        |
| LTR           | MaLR          | MTA_Mm        | chr7  | 79699433 79699827 + | 0        | 0        | 0        |
| Simple_repeat | Simple_repeat | (A)n          | chr7  | 79947443 79947482 + | 0        | 0        | 0        |
| LTR           | MaLR          | MTA_Mm        | chr7  | 79961838 79962218 - | 0        | 0        | 0        |
| LTR           | MaLR          | MTA_Mm        | chr7  | 79963318 79963712 - | 0        | 0        | 0        |
| Simple_repeat | Simple_repeat | (A)n          | chr7  | 80567428 80567463 + | 4.2269   | 0.380568 | 0.685246 |
| SINE          | Alu           | B1_Mus1       | chr7  | 80764656 80764802 + | 0        | 0        | 0        |
| Simple_repeat | Simple_repeat | (A)n          | chr7  | 80764803 80764843 + | 0        | 0        | 0        |
| SINE          | Alu           | B1_Mus1       | chr7  | 82947411 82947556 - | 0        | 0        | 0        |
| Simple_repeat | Simple_repeat | (A)n          | chr7  | 82949904 82949940 + | 0        | 0        | 0        |
| LTR           | MaLR          | MTA_Mm        | chr7  | 82977112 82977507 + | 0        | 0        | 0        |
| Simple_repeat | Simple_repeat | (A)n          | chr7  | 83034405 83034440 + | 0        | 0        | 0        |
| LTR           | MaLR          | MTB           | chr7  | 83311886 83312283 - | 0        | 0        | 0        |
| Simple_repeat | Simple_repeat | (A)n          | chr7  | 83358255 83358282 + | 0        | 0        | 0        |
| SINE          | Alu           | B1_Mus1       | chr7  | 84422635 84422772 - | 0        | 0        | 0        |
| SINE          | Alu           | B1_Mus2       | chr7  | 84435361 84435507 + | 0        | 0        | 0        |
| Simple_repeat | Simple_repeat | (A)n          | chr7  | 84435508 84435567 + | 0        | 0        | 0        |
| LINE          | L1            | L1Md_F        | chr7  | 84500001 84505115 - | 0        | 0        | 0        |
| LINE          | L1            | L1Md_F2       | chr7  | 84601290 84607812 - | 0        | 0        | 0        |
| LTR           | MaLR          | MTA_Mm        | chr7  | 84956283 84956677 + | 0        | 0        | 0        |
| SINE          | Alu           | B1_Mus2       | chr7  | 85222544 85222690 - | 0        | 0        | 0        |
| SINE          | Alu           | B1_Mus2       | chr7  | 86322761 86322899 + | 0        | 0        | 0        |
| Simple_repeat | Simple_repeat | (A)n          | chr7  | 86322900 86322931 + | 0        | 0        | 0        |
| SINE          | ID            | ID4_          | chr7  | 86765187 86765272 - | 0        | 0        | 0        |
| Simple_repeat | Simple_repeat | (A)n          | chr7  | 86878177 86878208 + | 0        | 0        | 0        |
| SINE          | Alu           | B1_Mus2       | chr7  | 86997322 86997466 + | 0        | 0        | 0        |
| Simple_repeat | Simple_repeat | (A)n          | chr7  | 86997467 86997502 + | 0        | 0        | 0        |
| SINE          | Alu           | B1_Mm         | chr7  | 87126379 87126528 - | 0        | 0        | 0        |
| Simple_repeat | Simple_repeat | (A)n          | chr7  | 87127533 87127554 + | 0        | 0        | 0        |
| SINE          | Alu           | B1_Mm         | chr7  | 87163954 87164100 - | 0.591053 | 0        | 0        |
| Simple_repeat | Simple_repeat | (A)n          | chr7  | 87958328 87958364 + | 0.332194 | 0        | 0        |
| SINE          | Alu           | B1_Mus1       | chr7  | 87990219 87990357 + | 0        | 0        | 0        |
| Simple_repeat | Simple_repeat | (A)n          | chr7  | 87990363 87990384 + | 0        | 0        | 0        |
| SINE          | Alu           | PB1D9         | chr7  | 88193853 88193969 + | 0        | 0        | 0        |
| Simple_repeat | Simple_repeat | (A)n          | chr7  | 88193970 88194001 + | 0        | 0        | 0        |
| SINE          | Alu           | B1_Mus1       | chr7  | 88251184 88251321 - | 0        | 0        | 0        |
| SINE          | Alu           | B1_Mus1       | chr7  | 89155465 89155627 + | 0        | 0        | 0        |
| Simple_repeat | Simple_repeat | (A)n          | chr7  | 89155628 89155652 + | 0        | 0        | 0        |
| LTR           | MaLR          | MTA_Mm        | chr7  | 90535309 90535703 + | 0        | 0        | 0        |
| SINE          | Alu           | B1_Mm         | chr7  | 91039299 91039444 + | 0.332194 | 0        | 0        |
| Simple_repeat | Simple_repeat | (A)n          | chr7  | 91039445 91039472 + | 0.664388 | 0        | 0        |
| SINE          | B2            | B2_Mm2        | chr11 | 79529388 79529574 - | 0        | 0        | 0        |
| SINE          | Alu           | B1_Mus2       | chr11 | 79535240 79535392 + | 0.827951 | 0        | 0        |
| Simple_repeat | Simple_repeat | (A)n          | chr11 | 79535393 79535416 + | 0.827951 | 0        | 0        |
| LINE          | L1            | L1Md_F2       | chr7  | 91640058 91646344 - | 0        | 0        | 0        |
| SINE          | Alu           | B1_Mus2       | chr7  | 91948197 91948344 + | 0        | 0        | 0        |
| Simple_repeat | Simple_repeat | (A)n          | chr7  | 91948345 91948374 + | 0        | 0        | 0.615324 |
| Simple_repeat | Simple_repeat | (A)n          | chr7  | 91950339 91950372 + | 0        | 0        | 0        |
| LINE          | L1            | L1_Mus1       | chr7  | 92472529 92478269 - | 0        | 0        | 0        |
| LINE          | L1            | L1_Mm         | chr7  | 92504588 92509196 + | 0        | 0        | 0        |
| LTR           | ERVK          | MMERVK10C-int | chr7  | 92990535 92997858 - | 0        | 0        | 0        |
| LINE          | L1            | L1Md_T        | chr7  | 93645972 93652411 - | 0        | 0        | 0        |
| SINE          | Alu           | B1_Mus1       | chr7  | 94349957 94350104 + | 0        | 0        | 0        |
| Simple_repeat | Simple_repeat | (A)n          | chr7  | 94350105 94350128 + | 0        | 0        | 0        |
| SINE          | Alu           | B1_Mus2       | chr7  | 94668643 94668789 + | 0        | 0        | 0        |
| Simple_repeat | Simple_repeat | (A)n          | chr7  | 94668790 94668831 + | 0.332194 | 0.380568 | 0.342623 |
| SINE          | Alu           | B1_Mus1       | chr7  | 95801776 95801923 - | 0        | 0        | 0        |
| SINE          | Alu           | B1_Mm         | chr7  | 95860639 95860784 + | 0        | 0        | 0        |
| Simple_repeat | Simple_repeat | (A)n          | chr7  | 95860785 95860826 + | 0        | 0        | 0        |
| SINE          | Alu           | B1_Mus2       | chr11 | 79791562 79791708 - | 0        | 0        | 0        |
| SINE          | Alu           | B1_Mus1       | chr7  | 96011138 96011285 - | 0        | 0.708814 | 0        |

|               |               |         |       |                     |          |          |          |
|---------------|---------------|---------|-------|---------------------|----------|----------|----------|
| Simple_repeat | Simple_repeat | (A)n    | chr7  | 96120264 96120305 + | 0        | 0        | 0        |
| SINE          | Alu           | B1_Mus1 | chr11 | 79800821 79800967 - | 0        | 0        | 0        |
| Simple_repeat | Simple_repeat | (A)n    | chr7  | 96488438 96488481 + | 0        | 0        | 0        |
| Simple_repeat | Simple_repeat | (A)n    | chr7  | 96589926 96589973 + | 0        | 0        | 0        |
| SINE          | Alu           | B1_Mus1 | chr7  | 97097571 97097707 + | 0        | 0        | 0        |
| Simple_repeat | Simple_repeat | (A)n    | chr7  | 97097708 97097731 + | 0        | 0        | 0        |
| SINE          | B2            | B2_Mm2  | chr7  | 97370204 97370390 - | 0        | 0        | 0        |
| SINE          | Alu           | B1_Mm   | chr7  | 97664080 97664231 + | 0        | 0        | 0        |
| LTR           | MaLR          | MTA_Mm  | chr7  | 97861306 97861693 + | 0        | 0        | 0        |
| LTR           | MaLR          | MTB_Mm  | chr7  | 99682320 99682699 - | 0        | 0        | 0        |
| SINE          | B2            | B2_Mm1a | chr11 | 79961662 79961855 + | 0        | 0        | 0        |
| Simple_repeat | Simple_repeat | (A)n    | chr11 | 79961856 79961877 + | 0        | 0        | 0        |
| SINE          | Alu           | B1_Mm   | chr7  | 99822363 99822508 + | 0        | 0        | 0        |
| LTR           | MaLR          | MTA_Mm  | chr7  | 10031210 10031249 + | 0        | 0.380568 | 0        |
| SINE          | Alu           | B1_Mus2 | chr11 | 80014448 80014593 - | 0        | 0        | 0        |
| LTR           | MaLR          | MTA_Mm  | chr7  | 10083790 10083829 + | 0        | 0        | 0        |
| SINE          | Alu           | B1_Mm   | chr7  | 10129095 10129110 - | 0        | 0        | 0        |
| Simple_repeat | Simple_repeat | (A)n    | chr7  | 10132065 10132070 + | 0.591053 | 0        | 0        |
| SINE          | Alu           | B1_Mus2 | chr7  | 10138948 10138962 - | 0        | 0        | 0        |
| SINE          | Alu           | B1_Mm   | chr7  | 10145612 10145627 + | 0.332194 | 0        | 0        |
| Simple_repeat | Simple_repeat | (A)n    | chr7  | 10145627 10145629 + | 0        | 0.380568 | 0        |
| Simple_repeat | Simple_repeat | (A)n    | chr7  | 10184477 10184480 + | 0.332194 | 0        | 0        |
| LTR           | MaLR          | MTA_Mm  | chr7  | 10212013 10212053 - | 0        | 0        | 0        |
| Simple_repeat | Simple_repeat | (A)n    | chr7  | 10247196 10247200 + | 0.591053 | 0        | 0        |
| SINE          | Alu           | B1_Mus1 | chr7  | 10262413 10262427 + | 0        | 0        | 0        |
| Simple_repeat | Simple_repeat | (A)n    | chr7  | 10262428 10262430 + | 0        | 0        | 0        |
| SINE          | Alu           | B1_Mm   | chr7  | 10294261 10294275 - | 0.591053 | 0        | 0        |
| Simple_repeat | Simple_repeat | (A)n    | chr7  | 10298374 10298379 + | 0        | 0        | 0        |
| SINE          | B4            | ID_B1   | chr10 | 25445135 25445348 - | 0        | 0        | 0        |
| Simple_repeat | Simple_repeat | (A)n    | chr7  | 10322820 10322823 + | 0        | 0        | 0        |
| SINE          | Alu           | B1_Mus2 | chr11 | 80231157 80231302 + | 3.31962  | 0        | 1.57327  |
| Simple_repeat | Simple_repeat | (A)n    | chr11 | 80231303 80231328 + | 2.39637  | 0        | 0.957947 |
| SINE          | Alu           | B1_Mus1 | chr7  | 10491230 10491244 + | 0        | 0        | 0        |
| Simple_repeat | Simple_repeat | (A)n    | chr7  | 10491245 10491250 + | 0        | 0        | 0        |
| SINE          | Alu           | B1_Mus1 | chr7  | 10494614 10494626 + | 0        | 0        | 0.615324 |
| Simple_repeat | Simple_repeat | (A)n    | chr7  | 10494626 10494628 + | 0        | 0        | 0.615324 |
| LTR           | MaLR          | MTA_Mm  | chr7  | 10535795 10535835 + | 0        | 0        | 0        |
| LTR           | MaLR          | MTA_Mm  | chr7  | 10535945 10535984 + | 0        | 0        | 0        |
| SINE          | Alu           | B1_Mus1 | chr7  | 10552352 10552366 + | 0        | 0        | 0        |
| Simple_repeat | Simple_repeat | (A)n    | chr7  | 10552366 10552368 + | 0        | 0        | 0        |
| Simple_repeat | Simple_repeat | (A)n    | chr7  | 10581386 10581389 + | 0        | 0        | 0        |
| Simple_repeat | Simple_repeat | (A)n    | chr7  | 10584102 10584106 + | 0        | 0        | 0        |
| SINE          | Alu           | B1_Mm   | chr7  | 10664218 10664233 - | 0        | 0        | 0        |
| SINE          | Alu           | B1_Mus1 | chr7  | 10664413 10664428 - | 0        | 0        | 0        |
| SINE          | Alu           | B1_Mm   | chr7  | 10664708 10664722 + | 0        | 0        | 0        |
| Simple_repeat | Simple_repeat | (A)n    | chr7  | 10664722 10664725 + | 0        | 0        | 0        |
| scRNA         | scRNA         | 4.5SRNA | chr7  | 10665232 10665242 + | 0        | 0        | 0        |
| SINE          | Alu           | B1_Mm   | chr7  | 10665242 10665256 + | 0        | 0        | 0        |
| Simple_repeat | Simple_repeat | (A)n    | chr7  | 10665457 10665461 + | 0        | 0        | 0        |
| Simple_repeat | Simple_repeat | (A)n    | chr7  | 10768237 10768240 + | 0        | 0        | 0        |
| Simple_repeat | Simple_repeat | (TTTA)n | chr7  | 10783401 10783405 + | 0        | 0        | 0        |
| SINE          | Alu           | B1_Mus2 | chr7  | 10785256 10785271 + | 0        | 0        | 0        |
| Simple_repeat | Simple_repeat | (A)n    | chr7  | 10785271 10785273 + | 0        | 0        | 0        |
| SINE          | Alu           | B1_Mus1 | chr7  | 10801448 10801463 - | 0        | 0        | 0        |
| Simple_repeat | Simple_repeat | (A)n    | chr7  | 10821144 10821147 + | 0        | 0        | 0        |
| Simple_repeat | Simple_repeat | (A)n    | chr7  | 10903340 10903344 + | 0        | 0        | 0        |
| Simple_repeat | Simple_repeat | (A)n    | chr7  | 10999554 10999561 + | 0        | 0        | 0        |
| SINE          | Alu           | B1_Mus1 | chr7  | 11037810 11037822 - | 0        | 0        | 0        |
| Simple_repeat | Simple_repeat | (A)n    | chr7  | 11075697 11075702 + | 0        | 0        | 0        |
| LTR           | MaLR          | MTA_Mm  | chr7  | 11109880 11109919 + | 0        | 0        | 0        |
| SINE          | Alu           | B1_Mus2 | chr7  | 11189768 11189782 - | 0        | 0        | 0        |
| SINE          | Alu           | B1_Mus2 | chr7  | 11193028 11193042 + | 0        | 0        | 0        |
| Simple_repeat | Simple_repeat | (GAAA)n | chr7  | 11193044 11193053 + | 0        | 0        | 0        |
| Simple_repeat | Simple_repeat | (A)n    | chr7  | 11238219 11238223 + | 0        | 0        | 0        |
| LINE          | L1            | L1_Mus2 | chr7  | 11319969 11320565 + | 0        | 0        | 0        |
| LINE          | L1            | L1_Mus2 | chr7  | 11344155 11344752 + | 0        | 0        | 0        |
| LINE          | L1            | L1Md_F2 | chr7  | 11350100 11350615 + | 0        | 0        | 0        |

|               |               |         |       |                     |          |          |          |
|---------------|---------------|---------|-------|---------------------|----------|----------|----------|
| SINE          | Alu           | B1_Mus1 | chr7  | 11383414 11383429 - | 0        | 0        | 0        |
| SINE          | Alu           | B1_Mm   | chr7  | 11389750 11389764 + | 0        | 0        | 0        |
| Simple_repeat | Simple_repeat | (A)n    | chr7  | 11389764 11389771 + | 0.332194 | 0        | 0        |
| SINE          | Alu           | B1_Mm   | chr7  | 11393291 11393306 + | 0        | 0        | 0        |
| Simple_repeat | Simple_repeat | (A)n    | chr7  | 11393306 11393308 + | 0        | 0        | 0        |
| Simple_repeat | Simple_repeat | (A)n    | chr7  | 11545426 11545431 + | 0        | 0        | 0        |
| Simple_repeat | Simple_repeat | (A)n    | chr7  | 11636434 11636438 + | 0        | 0        | 0        |
| SINE          | Alu           | PB1D10  | chr7  | 11677144 11677155 + | 0        | 0        | 0        |
| SINE          | B4            | RSINE1  | chr7  | 11677156 11677171 + | 0        | 0        | 0        |
| SINE          | Alu           | B1_Mus2 | chr7  | 11679517 11679531 + | 0        | 0        | 0        |
| Simple_repeat | Simple_repeat | (TTTA)n | chr7  | 11977436 11977440 + | 0.591053 | 0        | 0        |
| SINE          | Alu           | B1_Mus2 | chr7  | 11981833 11981847 + | 0        | 0        | 0        |
| Simple_repeat | Simple_repeat | (A)n    | chr7  | 11981847 11981850 + | 0        | 0        | 0        |
| Simple_repeat | Simple_repeat | (A)n    | chr7  | 12006431 12006434 + | 0        | 0        | 0        |
| SINE          | Alu           | B1_Mm   | chr7  | 12045890 12045905 + | 0        | 0        | 0        |
| Simple_repeat | Simple_repeat | (A)n    | chr7  | 12045905 12045907 + | 0        | 0        | 0        |
| SINE          | B2            | B3A     | chr7  | 12126971 12126988 + | 0        | 0        | 0        |
| SINE          | Alu           | B1_Mm   | chr7  | 12213935 12213949 - | 0        | 0        | 0        |
| Simple_repeat | Simple_repeat | (A)n    | chr7  | 12255675 12255678 + | 0        | 0        | 0        |
| SINE          | B2            | B2_Mm1t | chr7  | 12336216 12336235 + | 0        | 0        | 0        |
| Simple_repeat | Simple_repeat | (A)n    | chr7  | 12336235 12336238 + | 0.332194 | 0        | 0.685246 |
| Simple_repeat | Simple_repeat | (A)n    | chr7  | 12375033 12375035 + | 0        | 0        | 0        |
| SINE          | Alu           | B1_Mm   | chr7  | 12410065 12410079 + | 0        | 0        | 0        |
| Simple_repeat | Simple_repeat | (A)n    | chr7  | 12410079 12410084 + | 0        | 0        | 0        |
| SINE          | Alu           | B1_Mm   | chr7  | 12421433 12421448 - | 0        | 0        | 0        |
| LTR           | MaLR          | MTA_Mm  | chr11 | 82282149 82282543 - | 0        | 0        | 0        |
| LTR           | MaLR          | MTE2b   | chr7  | 12493021 12493055 + | 0        | 0        | 0        |
| SINE          | Alu           | B1_Mm   | chr7  | 12517368 12517383 + | 0        | 0        | 0        |
| LTR           | MaLR          | MTD     | chr7  | 12517383 12517419 + | 0        | 0        | 0        |
| Simple_repeat | Simple_repeat | (A)n    | chr7  | 12542299 12542301 + | 0        | 0        | 0        |
| SINE          | Alu           | B1_Mm   | chr11 | 82515748 82515902 + | 0        | 0        | 0        |
| Simple_repeat | Simple_repeat | (A)n    | chr11 | 82515903 82515933 + | 0        | 0        | 0        |
| Simple_repeat | Simple_repeat | (A)n    | chr7  | 12707879 12707883 + | 0        | 0        | 0        |
| SINE          | Alu           | B1_Mm   | chr7  | 12712337 12712351 + | 0        | 0        | 0        |
| Simple_repeat | Simple_repeat | (A)n    | chr7  | 12712351 12712354 + | 0        | 0        | 0        |
| Simple_repeat | Simple_repeat | (A)n    | chr7  | 12726911 12726915 + | 0        | 0        | 0        |
| Simple_repeat | Simple_repeat | (A)n    | chr7  | 12769478 12769481 + | 0        | 0        | 0        |
| LTR           | MaLR          | MTA_Mm  | chr7  | 12867178 12867218 - | 0        | 0        | 0        |
| SINE          | Alu           | B1_Mus1 | chr7  | 12896657 12896672 + | 0        | 0        | 0        |
| SINE          | Alu           | B1_Mus2 | chr7  | 12897278 12897293 - | 0        | 0        | 0        |
| LTR           | MaLR          | MTB     | chr11 | 82858321 82858724 - | 0        | 0        | 0        |
| SINE          | Alu           | B1_Mus2 | chr7  | 12992084 12992098 + | 0        | 0        | 0        |
| Simple_repeat | Simple_repeat | (A)n    | chr7  | 12992098 12992104 + | 0.332194 | 0        | 0        |
| SINE          | Alu           | B1_Mus1 | chr7  | 13019661 13019675 + | 0        | 0        | 0        |
| Simple_repeat | Simple_repeat | (A)n    | chr7  | 13019677 13019683 + | 0        | 0        | 0        |
| Simple_repeat | Simple_repeat | (A)n    | chr7  | 13254096 13254098 + | 0        | 0        | 0        |
| SINE          | Alu           | B1_Mm   | chr7  | 13347232 13347246 + | 0.332194 | 0        | 0        |
| Simple_repeat | Simple_repeat | (A)n    | chr7  | 13347246 13347251 + | 0.332194 | 0        | 0        |
| SINE          | Alu           | B1_Mus1 | chr7  | 13349114 13349129 - | 0        | 0        | 0        |
| SINE          | Alu           | B1_Mm   | chr7  | 13354631 13354646 - | 0        | 0        | 0        |
| Simple_repeat | Simple_repeat | (A)n    | chr7  | 13354963 13354966 + | 0        | 0.380568 | 0        |
| Simple_repeat | Simple_repeat | (A)n    | chr7  | 13368111 13368114 + | 0        | 0        | 0        |
| SINE          | B2            | B2_Mm1a | chr7  | 13377386 13377405 + | 0        | 0        | 0        |
| SINE          | Alu           | B1_Mus1 | chr7  | 13405601 13405616 + | 0        | 0        | 0        |
| Simple_repeat | Simple_repeat | (A)n    | chr7  | 13405616 13405620 + | 0        | 0        | 0        |
| SINE          | Alu           | PB1D9   | chr7  | 13420134 13420146 - | 0        | 0        | 0        |
| SINE          | Alu           | B1_Mus1 | chr7  | 13421143 13421157 - | 0        | 0        | 0        |
| Simple_repeat | Simple_repeat | (A)n    | chr7  | 13428903 13428908 + | 0        | 0        | 0        |
| LTR           | MaLR          | MTA_Mm  | chr7  | 13451271 13451311 + | 0        | 0        | 0        |
| LTR           | MaLR          | MTA_Mm  | chr7  | 13451407 13451447 + | 0        | 0        | 0.342623 |
| SINE          | Alu           | B1_Mm   | chr7  | 13456061 13456075 + | 0        | 0        | 0        |
| SINE          | Alu           | B1_Mus1 | chr7  | 13464077 13464089 + | 0        | 0        | 0        |
| Simple_repeat | Simple_repeat | (A)n    | chr7  | 13464089 13464091 + | 0        | 0        | 0        |
| Simple_repeat | Simple_repeat | (TTTA)n | chr7  | 13467081 13467085 + | 0.591053 | 0.708814 | 0        |
| SINE          | Alu           | B1_Mus2 | chr7  | 13479306 13479322 - | 0        | 0        | 1.23065  |
| Simple_repeat | Simple_repeat | (A)n    | chr7  | 13487171 13487176 + | 0.332194 | 0        | 0        |
| Simple_repeat | Simple_repeat | (TTTA)n | chr7  | 13488398 13488400 + | 0        | 0        | 0        |

|                |                |         |       |                     |          |          |          |
|----------------|----------------|---------|-------|---------------------|----------|----------|----------|
| SINE           | B2             | B3A     | chr7  | 13513258 13513277 - | 0        | 0        | 0        |
| SINE           | Alu            | B1_Mus1 | chr7  | 13546532 13546547 + | 0        | 0        | 0        |
| Simple_repeat  | Simple_repeat  | (A)n    | chr7  | 13546547 13546549 + | 0        | 0        | 0        |
| Simple_repeat  | Simple_repeat  | (A)n    | chr7  | 13548458 13548461 + | 0        | 0        | 1.23065  |
| SINE           | Alu            | B1_Mus2 | chr7  | 13563330 13563345 + | 0        | 0        | 0.342623 |
| SINE           | Alu            | B1_Mus1 | chr7  | 13570244 13570258 - | 0        | 0        | 0        |
| Simple_repeat  | Simple_repeat  | (A)n    | chr10 | 25897460 25897506 + | 0        | 0        | 0        |
| SINE           | B2             | B2_Mm1a | chr7  | 13753343 13753364 + | 0        | 0        | 0        |
| Simple_repeat  | Simple_repeat  | (A)n    | chr7  | 13753364 13753370 + | 0.664388 | 0        | 0        |
| Simple_repeat  | Simple_repeat  | (A)n    | chr7  | 13865643 13865646 + | 0        | 0        | 0        |
| SINE           | Alu            | B1_Mm   | chr11 | 83891508 83891654 + | 0        | 0        | 0        |
| Simple_repeat  | Simple_repeat  | (A)n    | chr11 | 83891655 83891700 + | 0        | 0        | 0        |
| SINE           | Alu            | B1_Mus1 | chr7  | 14013711 14013726 + | 4.74462  | 2.50701  | 3.29367  |
| Simple_repeat  | Simple_repeat  | (A)n    | chr7  | 14013726 14013729 + | 1.91983  | 2.50701  | 3.02097  |
| SINE           | Alu            | B1_Mm   | chr11 | 83961408 83961553 + | 0        | 0        | 0.957947 |
| Simple_repeat  | Simple_repeat  | (A)n    | chr11 | 83961554 83961588 + | 0        | 0        | 0.957947 |
| SINE           | Alu            | B1_Mur2 | chr11 | 83984105 83984248 - | 0        | 0        | 0        |
| Simple_repeat  | Simple_repeat  | (A)n    | chr7  | 14178322 14178325 + | 0        | 0        | 0        |
| SINE           | Alu            | B1_Mus2 | chr7  | 14185174 14185189 + | 0        | 0        | 0        |
| Low_complexity | Low_complexity | A-rich  | chr7  | 14297447 14297456 + | 0        | 0        | 0        |
| SINE           | Alu            | B1_Mur1 | chr7  | 14345894 14345909 + | 0        | 0        | 0        |
| Simple_repeat  | Simple_repeat  | (A)n    | chr7  | 14345909 14345913 + | 0        | 0        | 0        |
| Simple_repeat  | Simple_repeat  | (A)n    | chr7  | 14359849 14359853 + | 0        | 0        | 0        |
| Simple_repeat  | Simple_repeat  | (A)n    | chr7  | 14399906 14399910 + | 0        | 0        | 0.342623 |
| SINE           | Alu            | B1_Mus2 | chr7  | 14518143 14518158 + | 0        | 0        | 0        |
| Simple_repeat  | Simple_repeat  | (A)n    | chr7  | 14518158 14518162 + | 0        | 0        | 0        |
| SINE           | Alu            | B1_Mm   | chr7  | 14610962 14610976 + | 0        | 0        | 0        |
| Simple_repeat  | Simple_repeat  | (A)n    | chr7  | 14683406 14683409 + | 0        | 0        | 0        |
| LTR            | MaLR           | MTA_Mm  | chr7  | 14695618 14695658 + | 0        | 0        | 0        |
| Simple_repeat  | Simple_repeat  | (A)n    | chr7  | 14707763 14707766 + | 0        | 0        | 0        |
| Simple_repeat  | Simple_repeat  | (A)n    | chr7  | 14727285 14727289 + | 0        | 0        | 0        |
| Simple_repeat  | Simple_repeat  | (A)n    | chr7  | 14798175 14798178 + | 0        | 0        | 0        |
| SINE           | Alu            | B1_Mus1 | chr7  | 14819275 14819288 + | 0        | 0        | 0        |
| Simple_repeat  | Simple_repeat  | (A)n    | chr7  | 14819288 14819292 + | 0        | 0        | 0        |
| SINE           | Alu            | B1_Mus1 | chr7  | 14836667 14836681 - | 0        | 0        | 0        |
| SINE           | B2             | B2_Mm1t | chr7  | 14884514 14884533 - | 0        | 0        | 0.342623 |
| SINE           | Alu            | B1_Mus1 | chr7  | 14979876 14979890 + | 0        | 0        | 0        |
| Simple_repeat  | Simple_repeat  | (A)n    | chr7  | 14979890 14979894 + | 0        | 0        | 0        |
| Simple_repeat  | Simple_repeat  | (A)n    | chr7  | 14985665 14985673 + | 0        | 0        | 0        |
| Simple_repeat  | Simple_repeat  | (A)n    | chr7  | 15069511 15069513 + | 0        | 0        | 0        |
| SINE           | Alu            | B1_Mm   | chr7  | 15078810 15078824 + | 0        | 0        | 0        |
| SINE           | Alu            | B1_Mm   | chr7  | 15161772 15161786 - | 0        | 0        | 0        |
| SINE           | Alu            | B1_Mm   | chr11 | 84689127 84689260 + | 0        | 0        | 0        |
| Simple_repeat  | Simple_repeat  | (A)n    | chr11 | 84689261 84689308 + | 0        | 0        | 0        |
| Low_complexity | Low_complexity | GA-rich | chr7  | 15201787 15201799 + | 0        | 0        | 0        |
| SINE           | Alu            | B1_Mus2 | chr11 | 84769140 84769286 + | 0        | 0        | 0        |
| Simple_repeat  | Simple_repeat  | (A)n    | chr11 | 84769287 84769309 + | 0        | 0.380568 | 0        |
| SINE           | Alu            | B1_Mus1 | chr8  | 3560946 3561092 -   | 0        | 0        | 0        |
| LTR            | MaLR           | MTA_Mm  | chr8  | 3861211 3861583 +   | 0        | 0        | 0        |
| SINE           | Alu            | B1_Mm   | chr8  | 4133219 4133360 -   | 0        | 0        | 0        |
| LTR            | MaLR           | MTA_Mm  | chr8  | 4422710 4423104 -   | 0        | 0        | 0        |
| Simple_repeat  | Simple_repeat  | (A)n    | chr8  | 5119157 5119187 +   | 0        | 0        | 0.342623 |
| SINE           | Alu            | B1_Mus1 | chr8  | 5637088 5637232 +   | 0        | 0        | 0        |
| Low_complexity | Low_complexity | GA-rich | chr8  | 5637233 5637368 +   | 0        | 0        | 0        |
| SINE           | Alu            | B1_Mm   | chr8  | 5885533 5885679 -   | 0        | 0        | 0        |
| SINE           | Alu            | B1_Mus2 | chr8  | 6169310 6169455 +   | 0        | 0        | 0        |
| Simple_repeat  | Simple_repeat  | (A)n    | chr8  | 6169456 6169475 +   | 0        | 0        | 0        |
| LTR            | MaLR           | MTA_Mm  | chr8  | 6259817 6260202 -   | 0        | 0.708814 | 0        |
| Simple_repeat  | Simple_repeat  | (A)n    | chr8  | 6297219 6297259 +   | 0        | 0        | 0        |
| SINE           | Alu            | B1_Mus1 | chr8  | 6436951 6437104 +   | 0        | 0        | 0        |
| Simple_repeat  | Simple_repeat  | (A)n    | chr8  | 6460216 6460253 +   | 0        | 0        | 0        |
| Simple_repeat  | Simple_repeat  | (A)n    | chr8  | 6644418 6644457 +   | 0        | 0        | 0        |
| Simple_repeat  | Simple_repeat  | (A)n    | chr8  | 6857748 6857768 +   | 0        | 0        | 0        |
| LTR            | MaLR           | MTB     | chr8  | 7001471 7001867 -   | 0        | 0        | 0        |
| Simple_repeat  | Simple_repeat  | (A)n    | chr8  | 7135552 7135577 +   | 0        | 0        | 0        |
| Simple_repeat  | Simple_repeat  | (A)n    | chr8  | 7492555 7492591 +   | 0        | 0        | 0        |
| SINE           | Alu            | B1_Mus1 | chr11 | 85055835 85055982 - | 0        | 0        | 0        |



|                |                |         |       |          |          |   |          |          |          |
|----------------|----------------|---------|-------|----------|----------|---|----------|----------|----------|
| Simple_repeat  | Simple_repeat  | (A)n    | chr8  | 7914883  | 7914945  | + | 0        | 0        | 0        |
| LINE           | L1             | L1Md_F2 | chr8  | 8066791  | 8073201  | - | 0        | 0        | 0.615324 |
| Simple_repeat  | Simple_repeat  | (A)n    | chr8  | 8314801  | 8314850  | + | 0        | 0        | 0        |
| SINE           | Alu            | B1_Mus2 | chr8  | 8614893  | 8615039  | + | 0        | 0        | 0        |
| Simple_repeat  | Simple_repeat  | (A)n    | chr8  | 8615040  | 8615076  | + | 0        | 0        | 0        |
| SINE           | Alu            | B1_Mus2 | chr8  | 8701644  | 8701790  | - | 0        | 0        | 0        |
| Simple_repeat  | Simple_repeat  | (TTTA)n | chr8  | 8723275  | 8723297  | + | 0        | 0        | 0        |
| LTR            | MaLR           | MTA_Mm  | chr8  | 8816865  | 8817255  | - | 0        | 0        | 0        |
| Simple_repeat  | Simple_repeat  | (A)n    | chr8  | 8826065  | 8826112  | + | 0        | 0        | 0        |
| SINE           | Alu            | B1_Mus2 | chr11 | 85115720 | 85115860 | - | 0        | 0        | 0        |
| SINE           | Alu            | B1_Mus2 | chr8  | 9778463  | 9778609  | + | 0        | 0        | 0        |
| Simple_repeat  | Simple_repeat  | (A)n    | chr8  | 9778610  | 9778636  | + | 0        | 0        | 0        |
| SINE           | Alu            | B1_Mm   | chr11 | 85161428 | 85161569 | - | 0        | 0        | 0        |
| LTR            | MaLR           | MTB     | chr8  | 10799864 | 10800255 | - | 0        | 0        | 0        |
| SINE           | Alu            | B1_Mus2 | chr8  | 10969701 | 10969847 | - | 0        | 0        | 0        |
| SINE           | Alu            | B1_Mm   | chr8  | 11495289 | 11495433 | - | 0        | 0        | 0        |
| SINE           | Alu            | B1_Mus2 | chr8  | 12266863 | 12266998 | + | 0        | 0        | 0        |
| Simple_repeat  | Simple_repeat  | (A)n    | chr8  | 12495752 | 12495797 | + | 0        | 0        | 0        |
| Simple_repeat  | Simple_repeat  | (A)n    | chr8  | 12673499 | 12673532 | + | 0        | 0        | 0.615324 |
| SINE           | Alu            | B1_Mus1 | chr8  | 13690256 | 13690401 | + | 0        | 0        | 0        |
| Low_complexity | Low_complexity | A-rich  | chr8  | 13690402 | 13690472 | + | 0        | 0        | 0        |
| SINE           | Alu            | B1_Mus2 | chr8  | 13855473 | 13855619 | + | 0        | 0        | 0        |
| Simple_repeat  | Simple_repeat  | (A)n    | chr8  | 13855620 | 13855655 | + | 0        | 0        | 0        |
| LTR            | MaLR           | MTA_Mm  | chr8  | 15176455 | 15176846 | + | 0        | 0.708814 | 0        |
| LTR            | MaLR           | MTA_Mm  | chr8  | 15198515 | 15198910 | + | 0        | 0        | 0        |
| Simple_repeat  | Simple_repeat  | (A)n    | chr8  | 15449660 | 15449687 | + | 0        | 0        | 0        |
| Simple_repeat  | Simple_repeat  | (A)n    | chr8  | 15557450 | 15557479 | + | 0        | 0        | 0        |
| SINE           | ID             | ID2     | chr8  | 17560192 | 17560276 | - | 0        | 0        | 0        |
| LTR            | MaLR           | MTA_Mm  | chr8  | 17630582 | 17630961 | + | 0        | 0        | 0        |
| SINE           | Alu            | B1_Mus2 | chr8  | 18138356 | 18138493 | + | 0        | 0        | 0        |
| Simple_repeat  | Simple_repeat  | (A)n    | chr8  | 18326938 | 18326974 | + | 0        | 0        | 0        |
| Simple_repeat  | Simple_repeat  | (A)n    | chr8  | 18894133 | 18894175 | + | 0        | 0        | 0        |
| LTR            | MaLR           | MTA_Mm  | chr8  | 19539381 | 19539776 | + | 0        | 0        | 0.342623 |
| SINE           | Alu            | B1_Mus1 | chr8  | 22942384 | 22942530 | - | 0        | 0        | 0        |
| SINE           | Alu            | B1_Mm   | chr8  | 23025264 | 23025409 | - | 0        | 0        | 0        |
| SINE           | Alu            | B1_Mus2 | chr8  | 23301528 | 23301674 | + | 0        | 0        | 0        |
| LTR            | MaLR           | MTA_Mm  | chr8  | 25438769 | 25439166 | + | 0        | 0        | 0        |
| Simple_repeat  | Simple_repeat  | (A)n    | chr8  | 25493432 | 25493472 | + | 0        | 0        | 0        |
| LTR            | MaLR           | MTA_Mm  | chr8  | 25518738 | 25519129 | + | 0        | 0        | 0        |
| SINE           | Alu            | B1_Mur4 | chr8  | 25556609 | 25556730 | - | 0        | 0        | 0        |
| LTR            | MaLR           | MTB     | chr8  | 25611755 | 25612148 | - | 0        | 0        | 0        |
| Simple_repeat  | Simple_repeat  | (A)n    | chr8  | 26574112 | 26574140 | + | 0        | 0        | 0        |
| Simple_repeat  | Simple_repeat  | (A)n    | chr8  | 26581100 | 26581128 | + | 0        | 0        | 0        |
| LTR            | MaLR           | MTA_Mm  | chr8  | 27053880 | 27054275 | + | 0        | 0        | 0        |
| SINE           | Alu            | B1_Mus1 | chr11 | 86256819 | 86256954 | - | 0        | 0        | 0        |
| SINE           | Alu            | B1_Mus2 | chr8  | 27735629 | 27735779 | + | 0        | 0        | 0        |
| Simple_repeat  | Simple_repeat  | (A)n    | chr8  | 27735780 | 27735811 | + | 0        | 0        | 0        |
| LTR            | MaLR           | MTA_Mm  | chr8  | 27898119 | 27898511 | - | 0        | 0        | 0        |
| Low_complexity | Low_complexity | AT-rich | chr8  | 28320437 | 28320468 | + | 0        | 0        | 0        |
| LTR            | MaLR           | MTA_Mm  | chr8  | 28355228 | 28355622 | + | 0        | 0        | 0        |
| SINE           | Alu            | B1_Mus2 | chr8  | 28636372 | 28636521 | + | 0        | 0        | 0        |
| Simple_repeat  | Simple_repeat  | (A)n    | chr8  | 29265964 | 29266013 | + | 0        | 0        | 0        |
| LTR            | MaLR           | MTA_Mm  | chr8  | 29659436 | 29659815 | - | 0        | 0        | 0        |
| Simple_repeat  | Simple_repeat  | (A)n    | chr8  | 30607396 | 30607432 | + | 0        | 0        | 0        |
| SINE           | Alu            | B1_Mus1 | chr8  | 30981921 | 30982041 | - | 0        | 0        | 0        |
| LTR            | MaLR           | MTA_Mm  | chr8  | 30988457 | 30988850 | + | 0        | 0        | 0        |
| SINE           | Alu            | B1_Mm   | chr8  | 31064433 | 31064579 | + | 0        | 0        | 0        |
| Simple_repeat  | Simple_repeat  | (A)n    | chr8  | 31522711 | 31522739 | + | 0        | 0        | 0        |
| LTR            | MaLR           | MTA_Mm  | chr8  | 31885947 | 31886327 | + | 0.591053 | 0        | 0        |
| LTR            | MaLR           | MTA_Mm  | chr8  | 32059179 | 32059548 | + | 0        | 0        | 0        |
| LTR            | MaLR           | MTA_Mm  | chr8  | 32095674 | 32096065 | + | 0        | 0        | 0        |
| Simple_repeat  | Simple_repeat  | (A)n    | chr8  | 33115317 | 33115358 | + | 0        | 0        | 0        |
| LTR            | MaLR           | MTA_Mm  | chr8  | 33543311 | 33543698 | + | 0.591053 | 0        | 0        |
| Simple_repeat  | Simple_repeat  | (A)n    | chr8  | 34090225 | 34090256 | + | 0        | 0        | 0        |
| SINE           | Alu            | B1_Mus1 | chr8  | 34268624 | 34268770 | + | 0        | 0        | 0        |
| SINE           | Alu            | B1_Mus1 | chr8  | 34332837 | 34332964 | + | 0        | 0        | 0        |
| Simple_repeat  | Simple_repeat  | (A)n    | chr8  | 34332965 | 34332985 | + | 0        | 0        | 0        |

|                |                |            |       |                     |         |          |          |
|----------------|----------------|------------|-------|---------------------|---------|----------|----------|
| SINE           | Alu            | B1_Mus2    | chr8  | 34560826 34560972 + | 0       | 0        | 0        |
| Simple_repeat  | Simple_repeat  | (A)n       | chr8  | 34560973 34561017 + | 0       | 0        | 0        |
| Simple_repeat  | Simple_repeat  | (A)n       | chr8  | 35043079 35043115 + | 0       | 0        | 0        |
| SINE           | Alu            | B1_Mus2    | chr8  | 35109423 35109569 - | 0       | 0        | 0        |
| SINE           | Alu            | B1_Mus1    | chr8  | 35214861 35215010 - | 0       | 0        | 0        |
| Simple_repeat  | Simple_repeat  | (A)n       | chr8  | 35422964 35422993 + | 0       | 0        | 0        |
| SINE           | Alu            | B1_Mus2    | chr8  | 36130404 36130552 - | 0       | 0        | 0        |
| Simple_repeat  | Simple_repeat  | (A)n       | chr8  | 36271709 36271760 + | 0       | 0        | 0        |
| Simple_repeat  | Simple_repeat  | (A)n       | chr8  | 37103832 37103873 + | 0       | 0        | 0        |
| Simple_repeat  | Simple_repeat  | (A)n       | chr8  | 39751601 39751633 + | 0       | 0        | 0        |
| SINE           | Alu            | B1_Mm      | chr8  | 39872774 39872920 + | 0       | 0        | 0        |
| Simple_repeat  | Simple_repeat  | (A)n       | chr8  | 39872921 39872944 + | 0       | 0        | 0        |
| LTR            | MaLR           | MTA_Mm     | chr8  | 40476505 40476894 + | 0       | 0        | 0        |
| Simple_repeat  | Simple_repeat  | (A)n       | chr8  | 41867776 41867810 + | 0       | 0        | 0        |
| LTR            | MaLR           | MTA_Mm     | chr8  | 42271490 42271877 - | 0       | 0        | 0        |
| SINE           | Alu            | B1_Mus1    | chr8  | 42543775 42543923 + | 0       | 0        | 0        |
| Low_complexity | Low_complexity | A-rich     | chr8  | 42543935 42543967 + | 0       | 0        | 0        |
| LINE           | L1             | L1Md_F2    | chr8  | 42587006 42592293 - | 0       | 0        | 0        |
| LTR            | MaLR           | MTA_Mm     | chr8  | 43716956 43717349 - | 0       | 0        | 0        |
| LTR            | MaLR           | MTA_Mm     | chr8  | 43718429 43718822 - | 0       | 0        | 0        |
| SINE           | Alu            | B1_Mm      | chr8  | 44287862 44288006 + | 0       | 0        | 0        |
| Simple_repeat  | Simple_repeat  | (A)n       | chr8  | 44288007 44288032 + | 0       | 0        | 0        |
| SINE           | Alu            | B1_Mm      | chr8  | 44426680 44426826 + | 0       | 0        | 0        |
| Simple_repeat  | Simple_repeat  | (A)n       | chr8  | 44426827 44426854 + | 0       | 0        | 0        |
| SINE           | Alu            | B1_Mus1    | chr8  | 44823905 44824052 + | 0       | 0        | 0        |
| Simple_repeat  | Simple_repeat  | (A)n       | chr8  | 44824053 44824078 + | 0       | 0        | 0        |
| SINE           | Alu            | B1_Mus2    | chr8  | 44876437 44876583 + | 0       | 0        | 0        |
| Simple_repeat  | Simple_repeat  | (A)n       | chr8  | 44876584 44876717 + | 0       | 0        | 0        |
| LTR            | MaLR           | MTA_Mm     | chr8  | 45089812 45090186 + | 0       | 0        | 0        |
| LINE           | L1             | L1Md_F2    | chr8  | 45379230 45385341 - | 0       | 0        | 0        |
| Simple_repeat  | Simple_repeat  | (A)n       | chr8  | 45536722 45536766 + | 0       | 0        | 0        |
| Simple_repeat  | Simple_repeat  | (A)n       | chr8  | 46549539 46549565 + | 0       | 0        | 0        |
| SINE           | Alu            | B1_Mm      | chr8  | 48251306 48251452 + | 0       | 0        | 0        |
| Simple_repeat  | Simple_repeat  | (A)n       | chr8  | 48251453 48251483 + | 0       | 0        | 0        |
| SINE           | Alu            | B1_Mus1    | chr8  | 48543668 48543814 - | 0       | 0        | 0        |
| SINE           | Alu            | B1_Mus1    | chr8  | 48648542 48648688 - | 0       | 0        | 0        |
| SINE           | Alu            | B1_Mus1    | chr8  | 48726136 48726253 + | 0       | 0        | 0        |
| SINE           | Alu            | B1_Mus2    | chr8  | 48783816 48783960 - | 0       | 0        | 0        |
| SINE           | Alu            | B1_Mus1    | chr8  | 49100980 49101115 + | 0       | 0        | 0        |
| Simple_repeat  | Simple_repeat  | (A)n       | chr8  | 49101116 49101138 + | 0       | 0.380568 | 0        |
| LTR            | MaLR           | MTB        | chr8  | 49241649 49242047 - | 0       | 0.708814 | 0.615324 |
| Simple_repeat  | Simple_repeat  | (A)n       | chr8  | 49796393 49796431 + | 0       | 0        | 0        |
| LTR            | ERVK           | RMER6D     | chr8  | 50515401 50516187 + | 0       | 0        | 0        |
| Simple_repeat  | Simple_repeat  | (A)n       | chr8  | 50926890 50926918 + | 0       | 0        | 0        |
| LTR            | MaLR           | MTA_Mm     | chr8  | 51359765 51360156 + | 0       | 0        | 0        |
| Simple_repeat  | Simple_repeat  | (A)n       | chr8  | 51412196 51412222 + | 0       | 0        | 0        |
| LTR            | MaLR           | MTA_Mm     | chr8  | 51443621 51444013 + | 0       | 0        | 0        |
| SINE           | Alu            | B1_Mm      | chr8  | 51512988 51513133 + | 0       | 0        | 0        |
| Simple_repeat  | Simple_repeat  | (A)n       | chr8  | 51513134 51513166 + | 0       | 0        | 0        |
| SINE           | Alu            | B1_Mus2    | chr8  | 51824363 51824509 - | 1.18211 | 0        | 0.615324 |
| LINE           | L1             | L1Md_F2    | chr8  | 52060475 52065552 + | 0       | 0        | 1.10507  |
| LTR            | MaLR           | ORR1D1-int | chr8  | 52429191 52430442 - | 0       | 0        | 0        |
| Simple_repeat  | Simple_repeat  | (A)n       | chr8  | 53006005 53006047 + | 0       | 0        | 0        |
| Simple_repeat  | Simple_repeat  | (A)n       | chr8  | 53046760 53046803 + | 0       | 0        | 0        |
| SINE           | Alu            | B1_Mus1    | chr8  | 53464191 53464337 - | 0       | 0        | 0        |
| Simple_repeat  | Simple_repeat  | (A)n       | chr8  | 53900981 53901037 + | 0       | 0        | 0        |
| Simple_repeat  | Simple_repeat  | (A)n       | chr8  | 54506778 54506817 + | 0       | 0.380568 | 0.957947 |
| Simple_repeat  | Simple_repeat  | (GAAA)n    | chr8  | 54520446 54520619 + | 0       | 0        | 0        |
| Low_complexity | Low_complexity | A-rich     | chr8  | 54563175 54563287 + | 0       | 0        | 0        |
| Simple_repeat  | Simple_repeat  | (A)n       | chr8  | 55016041 55016077 + | 0       | 0        | 0        |
| Simple_repeat  | Simple_repeat  | (A)n       | chr8  | 55091961 55091988 + | 0       | 0        | 0        |
| SINE           | Alu            | B1_Mm      | chr8  | 55277062 55277207 - | 0       | 0        | 0        |
| Simple_repeat  | Simple_repeat  | (A)n       | chr8  | 58922436 58922482 + | 0       | 0        | 0        |
| SINE           | Alu            | B1_Mus1    | chr8  | 59104641 59104785 + | 0       | 0        | 0        |
| Simple_repeat  | Simple_repeat  | (A)n       | chr8  | 59104786 59104809 + | 0       | 0        | 0        |
| SINE           | Alu            | B1_Mus2    | chr11 | 88055784 88055917 + | 0       | 0        | 0        |
| Simple_repeat  | Simple_repeat  | (A)n       | chr11 | 88055918 88055941 + | 0       | 0        | 0        |

|                |                |          |       |                     |          |          |          |
|----------------|----------------|----------|-------|---------------------|----------|----------|----------|
| LTR            | MaLR           | MTA_Mm   | chr8  | 59524362 59524757 - | 0        | 0        | 0.342623 |
| LTR            | MaLR           | MTA_Mm   | chr8  | 59756679 59757060 + | 0        | 0        | 0        |
| SINE           | Alu            | B1_Mus2  | chr8  | 59882899 59883024 + | 0        | 0        | 0        |
| Simple_repeat  | Simple_repeat  | (A)n     | chr8  | 59883025 59883074 + | 0        | 0        | 0        |
| SINE           | Alu            | B1_Mur2  | chr8  | 59926214 59926359 + | 0        | 0        | 0        |
| Low_complexity | Low_complexity | A-rich   | chr8  | 59926362 59926426 + | 0        | 0        | 0        |
| Simple_repeat  | Simple_repeat  | (A)n     | chr8  | 61420247 61420328 + | 0.591053 | 0        | 0        |
| SINE           | B4             | ID_B1    | chr8  | 61585647 61585860 + | 0        | 0        | 0        |
| Simple_repeat  | Simple_repeat  | (A)n     | chr8  | 61585861 61585885 + | 0        | 0        | 0        |
| Simple_repeat  | Simple_repeat  | (A)n     | chr10 | 26491840 26491882 + | 0        | 0        | 0        |
| Simple_repeat  | Simple_repeat  | (A)n     | chr8  | 62066868 62066902 + | 0        | 0        | 0        |
| LINE           | L1             | L1Md_F2  | chr8  | 62339122 62344820 + | 0        | 0        | 0        |
| Simple_repeat  | Simple_repeat  | (A)n     | chr8  | 63172433 63172474 + | 0        | 0        | 0        |
| LTR            | MaLR           | MTA_Mm   | chr8  | 63186018 63186413 - | 0        | 0        | 0        |
| SINE           | Alu            | B1_Mus1  | chr8  | 63288522 63288668 + | 0        | 0        | 0        |
| Simple_repeat  | Simple_repeat  | (A)n     | chr8  | 63288669 63288707 + | 0        | 0        | 0        |
| SINE           | Alu            | B1_Mm    | chr8  | 63359483 63359628 - | 0        | 0        | 0        |
| SINE           | Alu            | B1_Mm    | chr8  | 63683984 63684115 + | 0        | 0        | 0        |
| Simple_repeat  | Simple_repeat  | (GAAAA)n | chr8  | 63684116 63684183 + | 0        | 0        | 0        |
| LTR            | MaLR           | MTB      | chr8  | 63934211 63934606 - | 0        | 0        | 0        |
| LINE           | L1             | L1Md_F2  | chr8  | 64649394 64655284 - | 0        | 0        | 0.342623 |
| SINE           | Alu            | B1_Mus2  | chr8  | 64899392 64899540 - | 0        | 0        | 0        |
| SINE           | Alu            | B1_Mm    | chr11 | 88630165 88630311 - | 0        | 0        | 0        |
| SINE           | Alu            | B1_Mus1  | chr8  | 65331953 65332099 + | 0        | 0        | 0        |
| LTR            | MaLR           | MTA_Mm   | chr8  | 65409137 65409532 + | 0        | 0        | 0        |
| LTR            | MaLR           | MTA_Mm   | chr8  | 65943005 65943398 + | 0        | 0        | 0        |
| LINE           | L1             | L1_Mus3  | chr8  | 66079146 66085069 - | 0        | 0        | 0        |
| Simple_repeat  | Simple_repeat  | (A)n     | chr8  | 66093597 66093623 + | 0        | 0        | 0        |
| SINE           | Alu            | B1_Mm    | chr11 | 88739080 88739225 + | 0        | 0        | 0.342623 |
| Simple_repeat  | Simple_repeat  | (A)n     | chr11 | 88739226 88739256 + | 0        | 0        | 0.342623 |
| SINE           | Alu            | B1_Mus2  | chr8  | 67423729 67423876 + | 0        | 0        | 0        |
| Simple_repeat  | Simple_repeat  | (A)n     | chr8  | 67423877 67423933 + | 0        | 0        | 0        |
| LINE           | L1             | L1Md_F2  | chr8  | 67755269 67761636 - | 0        | 0        | 0.615324 |
| LINE           | L1             | L1Md_F2  | chr8  | 69045686 69050636 + | 0        | 0        | 0        |
| Simple_repeat  | Simple_repeat  | (A)n     | chr8  | 69131143 69131177 + | 0        | 0        | 0        |
| SINE           | B2             | B2_Mm1t  | chr8  | 69237567 69237757 + | 0        | 0        | 0        |
| SINE           | Alu            | B1_Mus2  | chr8  | 69586444 69586590 + | 0        | 0        | 0        |
| Simple_repeat  | Simple_repeat  | (A)n     | chr8  | 69586591 69586615 + | 0        | 0        | 0        |
| Simple_repeat  | Simple_repeat  | (A)n     | chr8  | 69889516 69889537 + | 0        | 0        | 0        |
| SINE           | Alu            | B1_Mus2  | chr8  | 70456423 70456570 + | 0        | 0        | 0        |
| SINE           | Alu            | B1_Mus1  | chr8  | 70875587 70875734 - | 0.591053 | 0        | 0.342623 |
| SINE           | Alu            | B1_Mus2  | chr8  | 71387446 71387591 - | 0        | 0        | 0        |
| SINE           | Alu            | B1_Mus1  | chr8  | 71553053 71553199 + | 0        | 0        | 0        |
| Simple_repeat  | Simple_repeat  | (A)n     | chr8  | 71553200 71553255 + | 0        | 0        | 0        |
| LTR            | MaLR           | MTA_Mm   | chr8  | 72209932 72210329 + | 0        | 0        | 0        |
| SINE           | B2             | B2_Mm1t  | chr8  | 72212760 72212944 - | 0        | 0        | 0        |
| SINE           | Alu            | B1_Mm    | chr11 | 89021077 89021222 + | 0        | 0        | 0        |
| Simple_repeat  | Simple_repeat  | (A)n     | chr11 | 89021223 89021244 + | 0        | 0        | 0        |
| SINE           | Alu            | B1_Mus1  | chr8  | 73391442 73391589 - | 0        | 0        | 0        |
| SINE           | Alu            | B1_Mus2  | chr8  | 73405805 73405951 + | 0        | 0        | 0        |
| SINE           | Alu            | B1_Mm    | chr8  | 73763998 73764144 + | 0        | 0        | 0        |
| Simple_repeat  | Simple_repeat  | (A)n     | chr8  | 73764145 73764174 + | 0        | 0        | 0        |
| SINE           | B2             | B2_Mm2   | chr8  | 74017526 74017714 - | 0        | 0        | 0        |
| SINE           | Alu            | B1_Mus1  | chr8  | 74056019 74056158 - | 0        | 0        | 0        |
| LTR            | MaLR           | MTA_Mm   | chr8  | 74444007 74444401 - | 0        | 0        | 0        |
| SINE           | Alu            | B1_Mm    | chr8  | 74628346 74628495 + | 0        | 0        | 0        |
| Simple_repeat  | Simple_repeat  | (A)n     | chr8  | 74628496 74628547 + | 0        | 0.380568 | 0        |
| SINE           | Alu            | B1_Mm    | chr8  | 74710869 74711016 - | 0        | 0        | 0        |
| LINE           | L1             | L1Md_F2  | chr8  | 76029152 76035614 - | 0        | 0        | 0        |
| LTR            | MaLR           | MTA_Mm   | chr8  | 76367664 76368059 + | 0        | 0        | 0        |
| LINE           | L1             | Lx       | chr8  | 76683556 76687980 - | 0        | 0        | 0        |
| LINE           | L1             | L1Md_F2  | chr8  | 77033597 77039284 - | 0.332194 | 0        | 0.342623 |
| SINE           | Alu            | B1_Mm    | chr8  | 77730886 77731031 - | 0        | 0        | 0        |
| Simple_repeat  | Simple_repeat  | (A)n     | chr8  | 77759633 77759659 + | 0        | 0        | 0        |
| LTR            | MaLR           | MTA_Mm   | chr11 | 89619604 89619999 + | 0        | 0        | 0        |
| LINE           | L1             | L1Md_F3  | chr8  | 78687786 78693976 - | 0        | 0        | 0        |
| LINE           | L1             | L1_Mus1  | chr8  | 78759451 78765556 - | 0        | 0        | 0        |

|               |               |         |       |                     |          |          |          |
|---------------|---------------|---------|-------|---------------------|----------|----------|----------|
| Simple_repeat | Simple_repeat | (A)n    | chr8  | 78949564 78949592 + | 0        | 0        | 0        |
| SINE          | Alu           | B1_Mm   | chr8  | 80159529 80159675 - | 0        | 0        | 0        |
| Simple_repeat | Simple_repeat | (A)n    | chr8  | 80614288 80614323 + | 0.591053 | 0        | 0        |
| SINE          | Alu           | B1_Mm   | chr8  | 80693450 80693596 + | 0        | 0        | 0        |
| SINE          | Alu           | B1_Mm   | chr8  | 82002684 82002829 - | 0        | 0        | 0        |
| LINE          | L1            | Lx      | chr8  | 82331942 82338062 - | 0        | 0        | 0        |
| SINE          | Alu           | B1_Mus2 | chr8  | 82898210 82898347 - | 0        | 0        | 0        |
| SINE          | Alu           | B1_Mur4 | chr8  | 83271368 83271515 + | 0        | 0        | 0        |
| Simple_repeat | Simple_repeat | (A)n    | chr8  | 83271516 83271562 + | 0        | 0        | 0        |
| SINE          | Alu           | B1_Mus2 | chr8  | 83281797 83281943 - | 0.591053 | 0.708814 | 0        |
| LTR           | MaLR          | MTA_Mm  | chr11 | 90164611 90165009 + | 0        | 0        | 0        |
| Simple_repeat | Simple_repeat | (A)n    | chr8  | 85175047 85175114 + | 0        | 0        | 0        |
| SINE          | Alu           | B1_Mm   | chr8  | 86641105 86641236 + | 0        | 0        | 0        |
| Simple_repeat | Simple_repeat | (A)n    | chr8  | 86641237 86641263 + | 0        | 0        | 0        |
| SINE          | Alu           | B1_Mus2 | chr8  | 86802241 86802389 - | 0        | 0        | 0        |
| SINE          | Alu           | B1_Mm   | chr11 | 90583153 90583299 - | 0        | 0        | 0        |
| SINE          | Alu           | B1_Mus2 | chr11 | 90619878 90620024 - | 0        | 0        | 0        |
| SINE          | Alu           | B1_Mus2 | chr8  | 87419075 87419220 - | 0        | 0        | 0        |
| SINE          | Alu           | B1_Mus1 | chr8  | 87461716 87461862 - | 0        | 0.708814 | 0        |
| LTR           | MaLR          | MTA_Mm  | chr8  | 87628089 87628469 + | 0        | 0        | 0        |
| SINE          | Alu           | B1_Mm   | chr8  | 87660541 87660687 - | 0        | 0        | 0        |
| LTR           | ERV1          | RMER21A | chr8  | 87744729 87745752 + | 0        | 0        | 0        |
| SINE          | Alu           | B1_Mus1 | chr8  | 87979208 87979349 - | 0        | 0        | 0        |
| SINE          | Alu           | B1_Mm   | chr8  | 88013735 88013873 + | 0        | 0        | 0        |
| Simple_repeat | Simple_repeat | (A)n    | chr8  | 88013874 88013897 + | 0        | 0        | 0        |
| LTR           | MaLR          | MTA_Mm  | chr11 | 90778234 90778629 + | 0        | 0        | 0        |
| SINE          | Alu           | B1_Mm   | chr8  | 90494380 90494529 + | 0        | 0        | 0        |
| Simple_repeat | Simple_repeat | (A)n    | chr8  | 90494530 90494551 + | 0        | 0        | 0        |
| Simple_repeat | Simple_repeat | (A)n    | chr8  | 90508017 90508051 + | 0        | 0        | 0        |
| Simple_repeat | Simple_repeat | (A)n    | chr11 | 91001680 91001712 + | 0        | 0        | 0        |
| SINE          | Alu           | B1_Mm   | chr8  | 90703388 90703516 + | 0        | 0        | 0.615324 |
| Simple_repeat | Simple_repeat | (A)n    | chr8  | 90703517 90703540 + | 0        | 0        | 0.957947 |
| SINE          | Alu           | B1_Mm   | chr8  | 90720235 90720381 + | 0        | 0        | 0        |
| Simple_repeat | Simple_repeat | (A)n    | chr8  | 90720382 90720422 + | 0        | 0        | 0        |
| SINE          | Alu           | B1_Mm   | chr8  | 90791429 90791546 + | 0        | 0        | 0        |
| SINE          | Alu           | PB1D7   | chr8  | 90854945 90855058 - | 2.69641  | 0        | 1.57327  |
| SINE          | Alu           | PB1D10  | chr8  | 92718421 92718508 + | 0        | 0        | 0        |
| Simple_repeat | Simple_repeat | (A)n    | chr8  | 92718509 92718535 + | 0        | 0        | 0        |
| Simple_repeat | Simple_repeat | (A)n    | chr8  | 95078434 95078473 + | 0        | 0        | 0        |
| LTR           | MaLR          | MTA_Mm  | chr8  | 96257382 96257776 + | 0        | 0        | 0        |
| SINE          | Alu           | B1_Mus2 | chr8  | 97221630 97221775 - | 0        | 0        | 0        |
| SINE          | Alu           | B1_Mm   | chr8  | 98378650 98378796 + | 0        | 0        | 0        |
| Simple_repeat | Simple_repeat | (A)n    | chr8  | 98378797 98378822 + | 0        | 0        | 0        |
| SINE          | Alu           | B1_Mus1 | chr8  | 98380193 98380339 - | 0        | 0        | 0        |
| LTR           | MaLR          | MTD     | chr8  | 98923439 98923851 - | 0        | 0        | 0        |
| LTR           | MaLR          | MTA_Mm  | chr8  | 99478308 99478703 - | 0        | 0        | 0        |
| SINE          | Alu           | B1_Mus2 | chr8  | 99811309 99811454 - | 0        | 0        | 0        |
| Simple_repeat | Simple_repeat | (A)n    | chr8  | 99885489 99885510 + | 0        | 0        | 0        |
| LINE          | L1            | L1Md_T  | chr8  | 10006921 10007584 - | 0        | 0        | 0        |
| LTR           | MaLR          | MTA_Mm  | chr8  | 10118281 10118320 + | 0        | 0        | 0        |
| SINE          | Alu           | B1_Mus1 | chr8  | 10121508 10121521 - | 0        | 0        | 0        |
| Simple_repeat | Simple_repeat | (A)n    | chr8  | 10216197 10216201 + | 0.332194 | 0        | 0        |
| Simple_repeat | Simple_repeat | (A)n    | chr8  | 10299117 10299120 + | 0        | 0        | 0        |
| Simple_repeat | Simple_repeat | (A)n    | chr8  | 10331432 10331436 + | 0.332194 | 0        | 0        |
| Simple_repeat | Simple_repeat | (A)n    | chr8  | 10342302 10342308 + | 0        | 0        | 0        |
| SINE          | Alu           | B1_Mm   | chr8  | 10366987 10367002 + | 0        | 0        | 0        |
| Simple_repeat | Simple_repeat | (A)n    | chr8  | 10367002 10367005 + | 0        | 0        | 0        |
| Simple_repeat | Simple_repeat | (A)n    | chr8  | 10387771 10387775 + | 0        | 0        | 0        |
| LTR           | MaLR          | MTA_Mm  | chr8  | 10434075 10434115 + | 0        | 0        | 0        |
| LINE          | L1            | L1Md_T  | chr8  | 10466535 10467248 - | 0        | 0        | 0        |
| LINE          | L1            | L1Md_F2 | chr8  | 10484053 10484626 + | 0        | 0        | 0        |
| Simple_repeat | Simple_repeat | (A)n    | chr8  | 10542351 10542356 + | 0        | 0        | 0        |
| Simple_repeat | Simple_repeat | (A)n    | chr8  | 10652139 10652142 + | 0        | 0        | 0        |
| SINE          | Alu           | B1_Mm   | chr8  | 10715091 10715106 + | 0        | 0        | 0        |
| Simple_repeat | Simple_repeat | (A)n    | chr8  | 10715106 10715113 + | 0        | 0        | 0        |
| Simple_repeat | Simple_repeat | (A)n    | chr8  | 10762592 10762595 + | 0        | 0        | 0        |
| SINE          | Alu           | B1_Mus2 | chr8  | 10895255 10895269 - | 0        | 0        | 0        |

|                |                |         |       |                     |          |         |          |
|----------------|----------------|---------|-------|---------------------|----------|---------|----------|
| SINE           | Alu            | B1_Mus1 | chr8  | 10910849 10910863 - | 0        | 0       | 0        |
| SINE           | Alu            | B1_Mm   | chr8  | 10937630 10937644 + | 0        | 0       | 0        |
| Simple_repeat  | Simple_repeat  | (A)n    | chr8  | 10937645 10937647 + | 0.923247 | 0       | 0        |
| SINE           | Alu            | B1_Mm   | chr8  | 10963553 10963567 - | 0        | 0       | 0        |
| SINE           | Alu            | B1_Mus2 | chr8  | 10974110 10974125 + | 0        | 0       | 0        |
| Simple_repeat  | Simple_repeat  | (A)n    | chr8  | 10994992 10994995 + | 0        | 0       | 0        |
| SINE           | B2             | B2_Mm1t | chr8  | 11011517 11011536 + | 0        | 0       | 0        |
| SINE           | Alu            | PB1D10  | chr8  | 11012684 11012695 - | 0        | 0       | 0        |
| SINE           | Alu            | B1_Mm   | chr8  | 11024829 11024843 + | 0        | 0       | 0        |
| Simple_repeat  | Simple_repeat  | (A)n    | chr8  | 11024843 11024846 + | 0        | 0       | 0        |
| SINE           | Alu            | B1_Mm   | chr8  | 11032623 11032636 - | 0        | 0       | 0        |
| SINE           | Alu            | B1_Mus2 | chr8  | 11037079 11037094 - | 0        | 0       | 0        |
| Simple_repeat  | Simple_repeat  | (A)n    | chr8  | 11059637 11059641 + | 0        | 0       | 0        |
| SINE           | Alu            | B1_Mus2 | chr8  | 11112737 11112751 - | 0        | 0       | 0        |
| SINE           | Alu            | B1_Mus2 | chr8  | 11175831 11175846 - | 1.77316  | 0       | 0        |
| SINE           | Alu            | B1_Mur4 | chr8  | 11181913 11181927 + | 0        | 0       | 0.615324 |
| SINE           | Alu            | B1_Mus2 | chr8  | 11211317 11211332 + | 0        | 0       | 0        |
| Simple_repeat  | Simple_repeat  | (A)n    | chr8  | 11211332 11211335 + | 0        | 0       | 0.342623 |
| SINE           | Alu            | B1_Mus2 | chr8  | 11253238 11253253 - | 0        | 0       | 0        |
| Simple_repeat  | Simple_repeat  | (A)n    | chr8  | 11271872 11271874 + | 0        | 0       | 0        |
| Simple_repeat  | Simple_repeat  | (TTTA)n | chr8  | 11416345 11416348 + | 0        | 0       | 0        |
| SINE           | Alu            | B1_Mus2 | chr8  | 11446222 11446237 + | 0        | 0       | 0        |
| Simple_repeat  | Simple_repeat  | (A)n    | chr8  | 11446237 11446245 + | 0        | 0       | 0        |
| SINE           | Alu            | B1_Mus2 | chr8  | 11459308 11459323 + | 0        | 0       | 0        |
| Low_complexity | Low_complexity | A-rich  | chr8  | 11459323 11459329 + | 0        | 0       | 0        |
| SINE           | Alu            | B1_Mm   | chr8  | 11485893 11485907 - | 10.9481  | 12.0857 | 16.4115  |
| Simple_repeat  | Simple_repeat  | (A)n    | chr8  | 11502283 11502294 + | 0        | 0       | 0        |
| Simple_repeat  | Simple_repeat  | (A)n    | chr8  | 11503074 11503079 + | 0        | 0       | 0        |
| Simple_repeat  | Simple_repeat  | (A)n    | chr8  | 11640966 11640970 + | 0        | 0       | 0        |
| LTR            | MaLR           | MTA_Mm  | chr8  | 11814801 11814840 + | 0        | 0       | 0        |
| Simple_repeat  | Simple_repeat  | (A)n    | chr8  | 11869772 11869775 + | 0        | 0       | 0        |
| SINE           | Alu            | B1_Mm   | chr8  | 11877369 11877384 + | 0        | 0       | 0        |
| Simple_repeat  | Simple_repeat  | (GAA)n  | chr8  | 11877384 11877392 + | 0        | 0       | 0        |
| Simple_repeat  | Simple_repeat  | (A)n    | chr8  | 11887135 11887138 + | 0        | 0       | 0        |
| Simple_repeat  | Simple_repeat  | (A)n    | chr8  | 11939972 11939976 + | 0        | 0       | 0        |
| LTR            | MaLR           | MTB     | chr8  | 12041555 12041595 + | 0        | 0       | 0        |
| SINE           | Alu            | B1_Mus2 | chr11 | 94255060 94255211 - | 0        | 0       | 0        |
| Simple_repeat  | Simple_repeat  | (A)n    | chr8  | 12187645 12187648 + | 0        | 0       | 0        |
| Simple_repeat  | Simple_repeat  | (A)n    | chr8  | 12240632 12240635 + | 0        | 0       | 0        |
| SINE           | Alu            | B1_Mus2 | chr8  | 12243119 12243133 + | 0        | 0       | 0        |
| Simple_repeat  | Simple_repeat  | (A)n    | chr8  | 12243133 12243136 + | 0        | 0       | 0        |
| LTR            | MaLR           | MTA_Mm  | chr8  | 12257773 12257812 - | 0        | 0       | 0        |
| LTR            | MaLR           | MTA_Mm  | chr8  | 12259379 12259418 + | 0        | 0       | 0        |
| SINE           | B2             | B2_Mm1t | chr8  | 12276899 12276918 - | 0        | 0       | 0        |
| SINE           | Alu            | B1_Mus2 | chr8  | 12341458 12341472 - | 0        | 0       | 0        |
| SINE           | Alu            | B1_Mus2 | chr8  | 12395968 12395982 - | 0        | 0       | 0        |
| SINE           | Alu            | B1_Mm   | chr8  | 12497589 12497603 - | 0        | 0       | 0        |
| SINE           | B4             | ID_B1   | chr11 | 94543115 94543335 - | 0        | 0       | 0        |
| SINE           | Alu            | B1_Mm   | chr8  | 12508733 12508747 + | 0        | 0       | 0        |
| Simple_repeat  | Simple_repeat  | (A)n    | chr8  | 12508748 12508750 + | 0        | 0       | 0        |
| SINE           | Alu            | B1_Mus2 | chr8  | 12557504 12557519 + | 0        | 0       | 0        |
| Simple_repeat  | Simple_repeat  | (A)n    | chr8  | 12557519 12557522 + | 0        | 0       | 0        |
| SINE           | Alu            | B1_Mus2 | chr11 | 94596615 94596762 + | 0        | 0       | 0        |
| Simple_repeat  | Simple_repeat  | (A)n    | chr11 | 94596763 94596788 + | 0        | 0       | 0        |
| LTR            | MaLR           | MTB     | chr8  | 12615026 12615066 - | 0        | 0       | 0        |
| SINE           | Alu            | B1_Mus2 | chr8  | 12639395 12639409 - | 0        | 0       | 0        |
| SINE           | Alu            | B1_Mus2 | chr8  | 12639417 12639432 + | 0        | 0       | 0        |
| Simple_repeat  | Simple_repeat  | (A)n    | chr8  | 12639432 12639434 + | 0        | 0       | 0        |
| LTR            | MaLR           | MTA_Mm  | chr8  | 12707709 12707748 + | 0        | 0       | 0        |
| SINE           | Alu            | B1_Mus1 | chr8  | 12756930 12756944 - | 0        | 0       | 0.615324 |
| SINE           | Alu            | B1_Mm   | chr11 | 94733525 94733665 - | 0        | 0       | 0.342623 |
| Simple_repeat  | Simple_repeat  | (A)n    | chr8  | 12790073 12790077 + | 0.332194 | 0       | 0        |
| Simple_repeat  | Simple_repeat  | (A)n    | chr8  | 12810565 12810569 + | 0        | 0       | 0        |
| LTR            | MaLR           | MTA_Mm  | chr8  | 12842368 12842407 - | 0        | 0       | 0        |
| Simple_repeat  | Simple_repeat  | (A)n    | chr8  | 12866146 12866149 + | 0        | 0       | 0        |
| LTR            | MaLR           | MTA_Mm  | chr8  | 12868505 12868545 - | 0        | 0       | 0.342623 |
| SINE           | Alu            | B1_Mus1 | chr8  | 12943801 12943815 + | 0        | 0       | 0        |

|               |               |         |       |          |            |          |          |          |
|---------------|---------------|---------|-------|----------|------------|----------|----------|----------|
| Simple_repeat | Simple_repeat | (A)n    | chr8  | 12943815 | 12943818 + | 0        | 0        | 0        |
| SINE          | Alu           | B1_Mus2 | chr8  | 12950230 | 12950245 + | 0        | 0        | 0        |
| Simple_repeat | Simple_repeat | (A)n    | chr8  | 12950245 | 12950257 + | 0        | 0        | 0        |
| SINE          | Alu           | B1_Mus1 | chr8  | 13029316 | 13029329 + | 0        | 0        | 0        |
| Simple_repeat | Simple_repeat | (A)n    | chr8  | 13029329 | 13029337 + | 0        | 0        | 0        |
| LINE          | L1            | L1Md_F2 | chr8  | 13039370 | 13039838 + | 0        | 0        | 0        |
| LTR           | MaLR          | MTB     | chr8  | 13059788 | 13059828 + | 0        | 0        | 0        |
| Simple_repeat | Simple_repeat | (A)n    | chr8  | 13118066 | 13118069 + | 0        | 0        | 0        |
| SINE          | Alu           | B1_Mus2 | chr11 | 95035331 | 95035477 + | 0        | 0        | 0        |
| Simple_repeat | Simple_repeat | (A)n    | chr11 | 95035478 | 95035500 + | 0        | 0        | 0        |
| LTR           | MaLR          | MTA_Mm  | chr9  | 3291564  | 3291953 -  | 0        | 0        | 0        |
| SINE          | Alu           | B1_Mus2 | chr11 | 95112300 | 95112445 + | 0        | 0        | 0        |
| Simple_repeat | Simple_repeat | (A)n    | chr11 | 95112446 | 95112473 + | 0        | 0        | 0        |
| Simple_repeat | Simple_repeat | (A)n    | chr9  | 5039482  | 5039521 +  | 0        | 0        | 0        |
| Simple_repeat | Simple_repeat | (A)n    | chr9  | 5127787  | 5127809 +  | 0        | 0        | 0        |
| LTR           | MaLR          | MTA_Mm  | chr9  | 5166358  | 5166752 +  | 0        | 0        | 0        |
| SINE          | Alu           | B1_Mus1 | chr9  | 5189843  | 5189977 -  | 0        | 0        | 0        |
| SINE          | Alu           | B1_Mus1 | chr9  | 5245575  | 5245712 +  | 0        | 0        | 0        |
| Simple_repeat | Simple_repeat | (A)n    | chr9  | 5245713  | 5245754 +  | 0        | 0        | 0        |
| SINE          | Alu           | B1_Mus2 | chr9  | 5491705  | 5491849 +  | 0        | 0        | 0.342623 |
| SINE          | Alu           | B1_Mm   | chr9  | 5577244  | 5577390 -  | 0        | 0        | 0        |
| SINE          | Alu           | B1_Mus2 | chr9  | 5645142  | 5645288 +  | 0        | 0        | 0        |
| Simple_repeat | Simple_repeat | (GAAA)n | chr9  | 5645289  | 5645349 +  | 0        | 0        | 0        |
| SINE          | Alu           | B1_Mus2 | chr9  | 5848659  | 5848805 -  | 0        | 0        | 0        |
| Simple_repeat | Simple_repeat | (A)n    | chr10 | 27462752 | 27462806 + | 0        | 0        | 0        |
| LTR           | MaLR          | MTB     | chr9  | 7255216  | 7255613 +  | 0        | 0        | 0        |
| LTR           | MaLR          | MTA_Mm  | chr9  | 7267408  | 7267803 +  | 0        | 0        | 0        |
| LTR           | MaLR          | MTA_Mm  | chr9  | 7268900  | 7269295 +  | 0.332194 | 0        | 0.615324 |
| Simple_repeat | Simple_repeat | (A)n    | chr9  | 7593443  | 7593483 +  | 0        | 0        | 0        |
| Simple_repeat | Simple_repeat | (A)n    | chr9  | 7684180  | 7684228 +  | 0        | 0        | 0        |
| SINE          | Alu           | B1_Mus1 | chr9  | 7899052  | 7899198 +  | 0        | 0        | 0        |
| Simple_repeat | Simple_repeat | (A)n    | chr9  | 7899199  | 7899257 +  | 0        | 0        | 0        |
| SINE          | Alu           | B1_Mus1 | chr9  | 7911626  | 7911743 -  | 0        | 0        | 0        |
| LTR           | MaLR          | MTA_Mm  | chr9  | 8508040  | 8508435 +  | 0        | 0        | 0        |
| SINE          | Alu           | B1_Mm   | chr9  | 9277938  | 9278084 -  | 0        | 0        | 0        |
| SINE          | Alu           | B1_Mus2 | chr11 | 95468586 | 95468734 + | 0        | 0        | 0        |
| Simple_repeat | Simple_repeat | (A)n    | chr11 | 95468735 | 95468771 + | 0        | 0        | 0        |
| LTR           | MaLR          | MTA_Mm  | chr9  | 9361024  | 9361419 +  | 0.591053 | 0        | 0        |
| SINE          | Alu           | B1_Mm   | chr11 | 95499213 | 95499358 - | 0        | 0        | 0        |
| LTR           | MaLR          | MTA_Mm  | chr9  | 11419025 | 11419419 + | 0        | 0        | 0        |
| LTR           | ERVK          | RLTR45  | chr9  | 11513613 | 11514038 - | 0.332194 | 0        | 0        |
| LINE          | L1            | L1Md_F3 | chr9  | 12533593 | 12539976 + | 0        | 0        | 0        |
| Simple_repeat | Simple_repeat | (A)n    | chr9  | 12880296 | 12880328 + | 0        | 0        | 0        |
| Simple_repeat | Simple_repeat | (A)n    | chr9  | 12951421 | 12951462 + | 0        | 0        | 0        |
| SINE          | Alu           | B1_Mm   | chr9  | 13138414 | 13138560 + | 0        | 0        | 0        |
| SINE          | Alu           | B1_Mus2 | chr9  | 13331449 | 13331594 + | 0.923247 | 0        | 0        |
| Simple_repeat | Simple_repeat | (A)n    | chr9  | 13331595 | 13331618 + | 0.591053 | 0        | 0        |
| SINE          | Alu           | B1_Mus2 | chr9  | 13515354 | 13515499 + | 0        | 0.708814 | 0        |
| Simple_repeat | Simple_repeat | (A)n    | chr9  | 13515500 | 13515525 + | 0        | 0.708814 | 0        |
| SINE          | Alu           | B1_Mus1 | chr9  | 14432424 | 14432571 + | 0        | 0        | 0        |
| LINE          | L1            | L1Md_A  | chr10 | 27532354 | 27539767 - | 0        | 0        | 0        |
| SINE          | Alu           | B1_Mus2 | chr9  | 14684447 | 14684593 + | 0        | 0.380568 | 0        |
| Simple_repeat | Simple_repeat | (A)n    | chr9  | 14684594 | 14684618 + | 0        | 0        | 0        |
| Simple_repeat | Simple_repeat | (A)n    | chr9  | 14762485 | 14762517 + | 0        | 0        | 0        |
| SINE          | Alu           | B1_Mus1 | chr11 | 95789649 | 95789796 - | 0        | 0        | 0        |
| LTR           | MaLR          | MTA_Mm  | chr9  | 16786370 | 16786764 + | 0        | 0        | 0        |
| SINE          | Alu           | B1_Mus2 | chr9  | 17779615 | 17779761 - | 0        | 0        | 0        |
| LINE          | L1            | L1_Mus1 | chr9  | 17782484 | 17787747 + | 0        | 0        | 0        |
| SINE          | Alu           | B1_Mus2 | chr9  | 18334960 | 18335083 - | 0        | 0        | 0        |
| SINE          | Alu           | B1_Mus2 | chr9  | 18908476 | 18908621 - | 0        | 0        | 0        |
| SINE          | Alu           | B1_Mus1 | chr9  | 19230144 | 19230250 - | 0        | 0        | 0        |
| SINE          | Alu           | B1_Mm   | chr9  | 19673863 | 19674008 - | 0        | 0        | 0        |
| LTR           | MaLR          | MTA_Mm  | chr9  | 19839545 | 19839927 + | 0        | 0        | 0        |
| Simple_repeat | Simple_repeat | (A)n    | chr9  | 20440314 | 20440349 + | 0        | 0        | 0        |
| LTR           | ERV1          | RLTR23  | chr9  | 20689507 | 20689895 - | 0        | 0        | 0        |
| SINE          | Alu           | B1_Mm   | chr9  | 20689919 | 20690065 - | 0        | 0        | 0        |
| Simple_repeat | Simple_repeat | (A)n    | chr11 | 96045752 | 96045792 + | 0        | 0        | 0        |

|                |                |         |       |                     |          |          |          |
|----------------|----------------|---------|-------|---------------------|----------|----------|----------|
| SINE           | Alu            | B1_Mus2 | chr9  | 20964695 20964848 - | 0        | 0        | 0.615324 |
| Simple_repeat  | Simple_repeat  | (A)n    | chr9  | 21170237 21170286 + | 0        | 0        | 0        |
| SINE           | Alu            | B1_Mm   | chr9  | 21401698 21401844 + | 0        | 0        | 0        |
| Simple_repeat  | Simple_repeat  | (A)n    | chr9  | 21401845 21401879 + | 0        | 0        | 0        |
| Simple_repeat  | Simple_repeat  | (A)n    | chr11 | 96141884 96141922 + | 0        | 0        | 0        |
| SINE           | Alu            | B1_Mm   | chr9  | 21665077 21665223 - | 0        | 0        | 0        |
| Simple_repeat  | Simple_repeat  | (A)n    | chr9  | 21897352 21897387 + | 6.07381  | 3.52684  | 6.05776  |
| SINE           | Alu            | B1_Mm   | chr9  | 21945636 21945781 + | 0        | 0        | 0        |
| Simple_repeat  | Simple_repeat  | (A)n    | chr9  | 21945782 21945806 + | 0        | 0        | 0        |
| SINE           | Alu            | B1_Mus2 | chr9  | 22076163 22076309 + | 0        | 0        | 0        |
| Simple_repeat  | Simple_repeat  | (A)n    | chr9  | 22076310 22076335 + | 0        | 0        | 0        |
| SINE           | Alu            | B1_Mus2 | chr9  | 22119795 22119945 + | 0        | 0        | 0        |
| Simple_repeat  | Simple_repeat  | (A)n    | chr9  | 22119946 22119970 + | 0        | 0        | 0        |
| LTR            | MaLR           | MTA_Mm  | chr9  | 22963723 22964118 - | 0        | 0        | 0        |
| SINE           | Alu            | B1_Mus1 | chr9  | 23305963 23306101 + | 0        | 0        | 0        |
| SINE           | Alu            | B1_Mus2 | chr9  | 23382872 23383018 + | 0        | 0        | 0        |
| Simple_repeat  | Simple_repeat  | (A)n    | chr9  | 23383019 23383091 + | 0        | 0        | 0        |
| LTR            | MaLR           | MTA_Mm  | chr9  | 23394251 23394649 + | 0        | 0.380568 | 0        |
| SINE           | Alu            | B1_Mur3 | chr9  | 23494365 23494502 - | 0        | 0        | 0        |
| LTR            | MaLR           | MTA_Mm  | chr9  | 23871584 23871980 + | 0        | 0        | 0        |
| Simple_repeat  | Simple_repeat  | (A)n    | chr9  | 24212587 24212624 + | 0        | 0        | 0        |
| SINE           | Alu            | B1_Mur4 | chr9  | 24641035 24641219 + | 0        | 0        | 0        |
| Simple_repeat  | Simple_repeat  | (A)n    | chr9  | 24641220 24641249 + | 0        | 0        | 0        |
| SINE           | Alu            | B1_Mus1 | chr9  | 24730533 24730679 + | 0        | 0        | 0        |
| Simple_repeat  | Simple_repeat  | (A)n    | chr9  | 24730680 24730733 + | 0        | 0        | 0        |
| LTR            | MaLR           | MTA_Mm  | chr9  | 24733785 24734181 - | 0        | 0        | 0        |
| Simple_repeat  | Simple_repeat  | (A)n    | chr9  | 24847570 24847607 + | 0        | 0        | 0        |
| SINE           | B2             | B2_Mm1t | chr9  | 25674550 25674746 + | 0        | 0        | 0        |
| Low_complexity | Low_complexity | AT_rich | chr9  | 25674747 25674767 + | 0        | 0        | 0        |
| SINE           | Alu            | B1_Mus1 | chr9  | 25821210 25821355 - | 0        | 0        | 0        |
| LTR            | MaLR           | MTA_Mm  | chr9  | 25889214 25889606 + | 0        | 0        | 0        |
| LTR            | MaLR           | MTA_Mm  | chr9  | 25890701 25891094 + | 0        | 0        | 0.342623 |
| LINE           | L1             | L1Md_F2 | chr9  | 26149394 26155666 - | 0        | 0        | 0        |
| Simple_repeat  | Simple_repeat  | (A)n    | chr9  | 26289114 26289152 + | 0        | 0        | 0        |
| SINE           | Alu            | B1_Mus2 | chr9  | 26964459 26964604 - | 0        | 0        | 0        |
| SINE           | Alu            | B1_Mm   | chr11 | 96778318 96778455 + | 0.591053 | 0        | 0        |
| Simple_repeat  | Simple_repeat  | (A)n    | chr11 | 96778456 96778479 + | 0.923247 | 0.708814 | 0        |
| Simple_repeat  | Simple_repeat  | (A)n    | chr9  | 30321323 30321368 + | 0        | 0        | 0        |
| SINE           | Alu            | B1_Mur4 | chr10 | 27737512 27737662 + | 0        | 0        | 0        |
| Simple_repeat  | Simple_repeat  | (GAAA)n | chr10 | 27737663 27737740 + | 0        | 0        | 0        |
| SINE           | Alu            | B1_Mus2 | chr9  | 30815700 30815846 + | 0        | 0        | 0        |
| Simple_repeat  | Simple_repeat  | (A)n    | chr9  | 30815847 30815880 + | 0        | 0        | 0        |
| SINE           | Alu            | B1_Mus2 | chr9  | 31098915 31099060 + | 0        | 0        | 0        |
| Simple_repeat  | Simple_repeat  | (A)n    | chr9  | 31099061 31099086 + | 0        | 0        | 0        |
| SINE           | Alu            | B1_Mus1 | chr9  | 31363750 31363897 + | 0        | 0        | 0.342623 |
| Simple_repeat  | Simple_repeat  | (A)n    | chr9  | 31363898 31363920 + | 0        | 0        | 0        |
| SINE           | Alu            | B1_Mus2 | chr9  | 31893915 31894060 + | 6.21866  | 3.21582  | 5.24386  |
| Simple_repeat  | Simple_repeat  | (A)n    | chr9  | 31894061 31894089 + | 3.39388  | 1.08938  | 3.14654  |
| SINE           | Alu            | B1_Mus2 | chr9  | 32659305 32659447 + | 0        | 0        | 0        |
| Simple_repeat  | Simple_repeat  | (A)n    | chr9  | 32659448 32659471 + | 0        | 0        | 0        |
| Simple_repeat  | Simple_repeat  | (A)n    | chr9  | 32919547 32919580 + | 0        | 0        | 0        |
| LTR            | MaLR           | MTA_Mm  | chr9  | 33241160 33241553 - | 0        | 0        | 0        |
| Simple_repeat  | Simple_repeat  | (A)n    | chr9  | 35630443 35630469 + | 0        | 0        | 0        |
| Simple_repeat  | Simple_repeat  | (A)n    | chr11 | 97149068 97149138 + | 0        | 0        | 0.615324 |
| SINE           | B2             | B2_Mm1a | chr11 | 97218889 97219079 + | 0        | 0        | 0        |
| Simple_repeat  | Simple_repeat  | (A)n    | chr11 | 97219080 97219100 + | 0        | 0        | 0        |
| SINE           | Alu            | B1_Mus1 | chr9  | 37288206 37288359 - | 0.332194 | 0        | 0        |
| SINE           | Alu            | B1_Mus1 | chr9  | 38147881 38148018 - | 0        | 0        | 0        |
| SINE           | Alu            | B1_Mus1 | chr9  | 38284092 38284238 + | 0        | 0        | 0        |
| Simple_repeat  | Simple_repeat  | (A)n    | chr9  | 38284239 38284271 + | 0        | 0        | 0        |
| Simple_repeat  | Simple_repeat  | (A)n    | chr9  | 38313931 38314001 + | 0        | 0        | 0        |
| Simple_repeat  | Simple_repeat  | (A)n    | chr9  | 39221060 39221117 + | 0        | 0        | 0        |
| SINE           | Alu            | B1_Mus1 | chr9  | 39323842 39323989 - | 0        | 0        | 0        |
| SINE           | Alu            | B1_Mus2 | chr9  | 39481381 39481529 - | 0        | 0        | 0        |
| SINE           | Alu            | B1_Mm   | chr9  | 39660495 39660640 - | 0        | 0        | 0        |
| SINE           | Alu            | B1_Mm   | chr9  | 39993078 39993223 - | 0        | 0        | 0.615324 |
| Simple_repeat  | Simple_repeat  | (A)n    | chr9  | 39998710 39998746 + | 0        | 0        | 0        |

|               |               |         |       |          |            |          |          |          |
|---------------|---------------|---------|-------|----------|------------|----------|----------|----------|
| Simple_repeat | Simple_repeat | (TTTA)n | chr9  | 40030457 | 40030496 + | 0        | 0        | 0        |
| SINE          | Alu           | B1_Mus2 | chr9  | 40400353 | 40400498 + | 0        | 0        | 0        |
| Simple_repeat | Simple_repeat | (A)n    | chr9  | 40400499 | 40400532 + | 0        | 0        | 0        |
| DNA           | MER1_type     | RCHARR1 | chr9  | 41957231 | 41958174 + | 0        | 0        | 0        |
| LTR           | MaLR          | MTA_Mm  | chr9  | 42767936 | 42768331 + | 0.591053 | 0        | 0        |
| SINE          | Alu           | B1_Mm   | chr9  | 42927531 | 42927676 + | 0        | 0        | 0        |
| Simple_repeat | Simple_repeat | (A)n    | chr9  | 42927677 | 42927711 + | 0.332194 | 0        | 0        |
| SINE          | Alu           | B1_Mus2 | chr9  | 43385020 | 43385150 + | 0        | 0        | 0        |
| Simple_repeat | Simple_repeat | (A)n    | chr9  | 43385151 | 43385218 + | 0        | 0        | 0        |
| Simple_repeat | Simple_repeat | (A)n    | chr9  | 43658833 | 43658878 + | 0        | 0        | 0        |
| SINE          | Alu           | B1_Mus2 | chr9  | 43683869 | 43684014 + | 0        | 0        | 0        |
| Simple_repeat | Simple_repeat | (A)n    | chr9  | 43684015 | 43684061 + | 0        | 0        | 0        |
| SINE          | Alu           | B1_Mm   | chr9  | 43713452 | 43713598 + | 0        | 0        | 0        |
| Simple_repeat | Simple_repeat | (A)n    | chr9  | 43713599 | 43713653 + | 0        | 0        | 0        |
| SINE          | Alu           | B1_Mus2 | chr11 | 97656665 | 97656805 + | 0        | 0        | 0        |
| Simple_repeat | Simple_repeat | (A)n    | chr11 | 97656806 | 97656835 + | 0        | 0        | 0        |
| SINE          | Alu           | B1_Mm   | chr11 | 97701056 | 97701190 + | 0        | 0        | 0        |
| Simple_repeat | Simple_repeat | (A)n    | chr11 | 97701191 | 97701235 + | 0        | 0        | 0        |
| SINE          | Alu           | B1_Mus1 | chr9  | 44133527 | 44133674 - | 0        | 0        | 0        |
| SINE          | Alu           | B1_Mm   | chr9  | 44227857 | 44227986 + | 0        | 0        | 0        |
| SINE          | Alu           | B1_Mm   | chr9  | 44266842 | 44266988 - | 0        | 0        | 0        |
| SINE          | Alu           | B1_Mus1 | chr9  | 44348512 | 44348659 - | 0        | 0        | 0        |
| SINE          | Alu           | B1_Mus1 | chr11 | 97748173 | 97748318 + | 0        | 0        | 0        |
| Simple_repeat | Simple_repeat | (A)n    | chr11 | 97748319 | 97748350 + | 0        | 0        | 0        |
| SINE          | Alu           | B1_Mus2 | chr9  | 45645966 | 45646114 - | 0        | 0        | 0        |
| SINE          | B2            | B2_Mm1a | chr9  | 45767447 | 45767639 + | 0        | 0        | 0        |
| Simple_repeat | Simple_repeat | (A)n    | chr9  | 45767640 | 45767666 + | 0        | 0.708814 | 0        |
| SINE          | Alu           | B1_Mm   | chr9  | 46144661 | 46144806 - | 0        | 0        | 0        |
| SINE          | Alu           | B1_Mus1 | chr9  | 46349981 | 46350128 - | 0        | 0        | 0        |
| Simple_repeat | Simple_repeat | (A)n    | chr9  | 46369485 | 46369526 + | 0        | 0        | 0.615324 |
| Simple_repeat | Simple_repeat | (A)n    | chr9  | 48296496 | 48296535 + | 0        | 0        | 0        |
| LTR           | MaLR          | MTA_Mm  | chr9  | 48692351 | 48692745 - | 0        | 0        | 0        |
| LTR           | MaLR          | MTA_Mm  | chr9  | 48734513 | 48734913 + | 0        | 0        | 0        |
| LTR           | MaLR          | MTA_Mm  | chr9  | 48738494 | 48738892 - | 0        | 0        | 0        |
| SINE          | Alu           | B1_Mm   | chr9  | 48965994 | 48966130 + | 0        | 0        | 0        |
| Simple_repeat | Simple_repeat | (A)n    | chr9  | 48966131 | 48966155 + | 0        | 0        | 0        |
| SINE          | B4            | B4      | chr9  | 48984039 | 48984350 - | 0        | 0        | 0        |
| LTR           | MaLR          | MTA_Mm  | chr9  | 49242116 | 49242510 + | 0        | 0        | 0        |
| Simple_repeat | Simple_repeat | (A)n    | chr9  | 49809174 | 49809208 + | 0        | 0        | 0        |
| Simple_repeat | Simple_repeat | (A)n    | chr9  | 50115259 | 50115294 + | 0        | 0        | 0        |
| SINE          | B2            | B2_Mm1a | chr9  | 50208684 | 50208876 - | 0        | 0        | 0        |
| SINE          | B2            | B2_Mm1t | chr9  | 50437487 | 50437679 + | 0        | 0.380568 | 0.615324 |
| SINE          | Alu           | B1_Mm   | chr9  | 50849961 | 50850100 + | 0        | 0        | 0        |
| Simple_repeat | Simple_repeat | (A)n    | chr9  | 50850101 | 50850123 + | 0        | 0        | 0        |
| Simple_repeat | Simple_repeat | (A)n    | chr9  | 51342700 | 51342741 + | 0        | 0        | 0        |
| SINE          | Alu           | B1_Mur3 | chr9  | 51720923 | 51721063 + | 0        | 0        | 0        |
| SINE          | Alu           | B1_Mm   | chr9  | 52146399 | 52146545 - | 0        | 0        | 0        |
| Simple_repeat | Simple_repeat | (A)n    | chr9  | 52260007 | 52260057 + | 0        | 0        | 0        |
| Simple_repeat | Simple_repeat | (A)n    | chr9  | 53592235 | 53592268 + | 0        | 0        | 0        |
| LTR           | MaLR          | MTB     | chr9  | 53607181 | 53607529 + | 0        | 0        | 0        |
| SINE          | Alu           | B1_Mm   | chr9  | 54687197 | 54687343 + | 0        | 0        | 0        |
| Simple_repeat | Simple_repeat | (A)n    | chr9  | 54687344 | 54687375 + | 0        | 0        | 0        |
| Simple_repeat | Simple_repeat | (A)n    | chr11 | 98458939 | 98458976 + | 0        | 0        | 0        |
| LTR           | ERV1          | RMER5   | chr9  | 54955204 | 54955685 - | 0        | 0        | 0        |
| SINE          | B2            | B2_Mm1t | chr9  | 54958893 | 54959082 - | 0        | 0        | 0        |
| SINE          | B2            | B2_Mm1t | chr9  | 54964508 | 54964702 + | 0        | 0        | 0        |
| SINE          | Alu           | B1_Mus1 | chr9  | 54991821 | 54991968 - | 0        | 0        | 0        |
| SINE          | Alu           | B1_Mus1 | chr9  | 55921402 | 55921548 + | 0        | 0        | 0.615324 |
| LTR           | ERVK          | RMER17C | chr9  | 55921549 | 55921910 + | 0        | 0        | 0.615324 |
| SINE          | Alu           | B1_Mm   | chr9  | 56415397 | 56415542 + | 0        | 0        | 0        |
| SINE          | B2            | B2_Mm1a | chr9  | 56590269 | 56590461 - | 0.591053 | 0        | 0        |
| SINE          | Alu           | B1_Mm   | chr9  | 56651763 | 56651908 + | 0        | 0        | 0        |
| Simple_repeat | Simple_repeat | (A)n    | chr9  | 56651909 | 56651934 + | 0        | 0        | 0        |
| SINE          | Alu           | B1_Mus2 | chr9  | 56832323 | 56832468 + | 1.77316  | 0.380568 | 1.23065  |
| Simple_repeat | Simple_repeat | (A)n    | chr9  | 56832469 | 56832511 + | 0.591053 | 0.380568 | 1.57327  |
| SINE          | B2            | B2_Mm1a | chr9  | 57496781 | 57496984 + | 0        | 0        | 0        |
| SINE          | Alu           | B1_Mus2 | chr9  | 57555431 | 57555577 - | 0        | 0        | 0        |



|               |               |          |       |                     |          |          |          |
|---------------|---------------|----------|-------|---------------------|----------|----------|----------|
| SINE          | Alu           | B1_Mm    | chr9  | 57618469 57618614 - | 0.332194 | 0        | 0        |
| SINE          | Alu           | B1_Mus2  | chr9  | 57818537 57818694 + | 0        | 0        | 0        |
| Simple_repeat | Simple_repeat | (A)n     | chr9  | 57818695 57818717 + | 0        | 0        | 0        |
| SINE          | Alu           | B1_Mur2  | chr9  | 58057786 58057927 + | 0.591053 | 0        | 0        |
| SINE          | B2            | B2_Mm1a  | chr9  | 58428496 58428689 - | 0        | 0        | 0        |
| SINE          | Alu           | B1_Mus2  | chr9  | 59359654 59359801 + | 0        | 0        | 0        |
| Simple_repeat | Simple_repeat | (A)n     | chr9  | 59359802 59359823 + | 0.591053 | 0        | 0        |
| SINE          | B2            | B3A      | chr9  | 59359824 59359979 + | 0.591053 | 0        | 0        |
| SINE          | Alu           | B1_Mus1  | chr9  | 59376565 59376710 - | 0        | 0        | 0.342623 |
| SINE          | Alu           | PB1D9    | chr9  | 59414309 59414425 - | 0        | 0        | 0        |
| SINE          | Alu           | B1_Mm    | chr11 | 98889294 98889420 + | 0        | 0        | 0.342623 |
| Simple_repeat | Simple_repeat | (A)n     | chr11 | 98889421 98889446 + | 0        | 0        | 0.342623 |
| Simple_repeat | Simple_repeat | (TTTA)n  | chr9  | 60399934 60399955 + | 0        | 0        | 0        |
| SINE          | Alu           | B1_Mur4  | chr11 | 98957602 98957740 - | 0        | 0        | 0        |
| SINE          | Alu           | B1_Mus1  | chr9  | 60888404 60888547 + | 0        | 0        | 0        |
| Simple_repeat | Simple_repeat | (A)n     | chr9  | 60888548 60888595 + | 0        | 0        | 0        |
| Simple_repeat | Simple_repeat | (A)n     | chr9  | 61544106 61544171 + | 0        | 0        | 0        |
| Simple_repeat | Simple_repeat | (A)n     | chr9  | 61587495 61587532 + | 0        | 0        | 0        |
| LTR           | MaLR          | MTA_Mm   | chr9  | 61599381 61599779 + | 0        | 0        | 0        |
| SINE          | B2            | B2_Mm1a  | chr9  | 61721718 61721908 + | 0        | 0        | 0        |
| Simple_repeat | Simple_repeat | (CAAAA)n | chr9  | 61721909 61721926 + | 0.332194 | 0.380568 | 0        |
| SINE          | Alu           | B1_Mus1  | chr9  | 61763731 61763878 - | 0        | 0        | 0        |
| SINE          | Alu           | B1_Mus2  | chr9  | 62058379 62058524 + | 0        | 0        | 0        |
| SINE          | Alu           | B1_Mus2  | chr9  | 62158118 62158264 + | 0        | 0        | 0        |
| LTR           | MaLR          | MTA_Mm   | chr9  | 62470928 62471323 + | 0        | 0        | 0        |
| SINE          | Alu           | B1_Mus1  | chr9  | 62935639 62935774 + | 0        | 0        | 0        |
| Simple_repeat | Simple_repeat | (A)n     | chr9  | 62935775 62935799 + | 0        | 0        | 0        |
| SINE          | Alu           | B1_Mm    | chr9  | 63001853 63001978 + | 0        | 0        | 0        |
| SINE          | Alu           | B1_Mus2  | chr11 | 99200152 99200298 + | 0        | 0        | 0        |
| Simple_repeat | Simple_repeat | (A)n     | chr11 | 99200299 99200320 + | 0        | 0        | 0        |
| SINE          | Alu           | B1_Mus1  | chr9  | 63698734 63698881 - | 0        | 0        | 0        |
| Simple_repeat | Simple_repeat | (A)n     | chr11 | 99259477 99259503 + | 0        | 0        | 0        |
| SINE          | B4            | ID_B1    | chr9  | 63954152 63954368 + | 0        | 0        | 0        |
| SINE          | Alu           | B1_Mus2  | chr9  | 64112392 64112537 - | 0        | 0        | 0        |
| SINE          | Alu           | B1_Mus2  | chr9  | 64196817 64196961 + | 0        | 0        | 0        |
| Simple_repeat | Simple_repeat | (A)n     | chr9  | 64196962 64196992 + | 0        | 0        | 0        |
| SINE          | Alu           | B1_Mus1  | chr9  | 64209943 64210095 - | 0        | 0        | 0        |
| Simple_repeat | Simple_repeat | (A)n     | chr11 | 99326369 99326409 + | 0        | 0        | 0        |
| Simple_repeat | Simple_repeat | (A)n     | chr9  | 64643968 64644055 + | 0        | 0        | 0        |
| Simple_repeat | Simple_repeat | (T)n     | chr11 | 99419732 99419786 + | 0        | 0.380568 | 0        |
| SINE          | Alu           | B1_Mus1  | chr9  | 65035204 65035351 - | 0        | 0        | 0        |
| Simple_repeat | Simple_repeat | (TTTA)n  | chr9  | 65094002 65094043 + | 0        | 0        | 0        |
| Simple_repeat | Simple_repeat | (A)n     | chr9  | 65186181 65186232 + | 0        | 0        | 0        |
| Simple_repeat | Simple_repeat | (A)n     | chr9  | 65434355 65434378 + | 0        | 0        | 0.342623 |
| SINE          | Alu           | B1_Mus2  | chr9  | 65473444 65473587 - | 0        | 0        | 0        |
| SINE          | Alu           | B1_Mus2  | chr9  | 66150414 66150554 - | 0        | 0        | 0        |
| LTR           | MaLR          | MTA_Mm   | chr11 | 99760709 99761105 + | 0        | 0        | 0        |
| SINE          | Alu           | B1_Mm    | chr9  | 66846291 66846435 - | 0        | 0        | 0        |
| SINE          | B2            | B2_Mm1a  | chr9  | 66898098 66898288 + | 0        | 0        | 0        |
| Simple_repeat | Simple_repeat | (A)n     | chr9  | 66898289 66898324 + | 1.18211  | 0.380568 | 0        |
| Simple_repeat | Simple_repeat | (A)n     | chr9  | 66957409 66957438 + | 0        | 0        | 0        |
| LTR           | MaLR          | MTB      | chr9  | 67013850 67014152 + | 0        | 0        | 0        |
| SINE          | Alu           | B1_Mus2  | chr11 | 99829937 99830083 + | 0        | 0        | 0        |
| Simple_repeat | Simple_repeat | (A)n     | chr11 | 99830084 99830109 + | 0        | 0        | 0        |
| SINE          | B4            | B4       | chr9  | 68021105 68021344 - | 0        | 0.380568 | 0        |
| SINE          | B2            | B2_Mm1t  | chr9  | 68021354 68021543 - | 0        | 0        | 0        |
| LTR           | MaLR          | MTB      | chr9  | 69550849 69551254 + | 0        | 0        | 0        |
| SINE          | Alu           | B1_Mus2  | chr9  | 69859642 69859793 - | 0        | 0        | 0        |
| SINE          | B2            | B2_Mm1a  | chr9  | 69871683 69871867 - | 0        | 0        | 0        |
| SINE          | Alu           | B1_Mm    | chr9  | 69934500 69934644 - | 0        | 0        | 0        |
| LTR           | MaLR          | MTB      | chr9  | 72118897 72119341 + | 0        | 0        | 0        |
| Simple_repeat | Simple_repeat | (A)n     | chr9  | 72241773 72241817 + | 0        | 0        | 0        |
| SINE          | Alu           | B1_Mus1  | chr9  | 72354561 72354707 - | 0        | 0        | 0        |
| SINE          | Alu           | B1_Mus1  | chr9  | 72472519 72472666 - | 0        | 0        | 0        |
| SINE          | Alu           | B1_Mus2  | chr11 | 10040477 10040491 - | 0        | 0        | 0        |
| SINE          | Alu           | B1_Mm    | chr9  | 73293988 73294134 + | 0        | 0        | 0        |
| Simple_repeat | Simple_repeat | (A)n     | chr9  | 73314792 73314824 + | 0.591053 | 0        | 0.342623 |

|                |                |         |       |                     |          |          |          |
|----------------|----------------|---------|-------|---------------------|----------|----------|----------|
| LTR            | MaLR           | MTA_Mm  | chr9  | 73927013 73927410 - | 0        | 0        | 0        |
| SINE           | Alu            | B1_Mm   | chr9  | 74444053 74444196 + | 0        | 0        | 0        |
| Simple_repeat  | Simple_repeat  | (A)n    | chr9  | 74763531 74763564 + | 0.591053 | 0        | 0        |
| SINE           | Alu            | B1_Mus1 | chr9  | 75268415 75268569 - | 0        | 0        | 0        |
| Simple_repeat  | Simple_repeat  | (A)n    | chr9  | 75620680 75620716 + | 0        | 0        | 0        |
| LTR            | MaLR           | MTA_Mm  | chr9  | 77595262 77595659 - | 0        | 0        | 0        |
| SINE           | Alu            | B1_Mm   | chr11 | 10081022 10081036 + | 0        | 0        | 0        |
| Simple_repeat  | Simple_repeat  | (A)n    | chr11 | 10086472 10086479 + | 0        | 0        | 0        |
| Simple_repeat  | Simple_repeat  | (A)n    | chr9  | 79866111 79866133 + | 0        | 0        | 0        |
| LINE           | L1             | L1Md_F2 | chr9  | 81235045 81241032 - | 0.591053 | 0.708814 | 0.615324 |
| LTR            | MaLR           | MTA_Mm  | chr9  | 81260388 81260783 - | 0.591053 | 1.41763  | 1.23065  |
| LTR            | MaLR           | MTA_Mm  | chr9  | 81568796 81569153 - | 0        | 0        | 0        |
| SINE           | Alu            | B1_Mur3 | chr11 | 10100067 10100082 - | 0        | 0        | 0        |
| SINE           | Alu            | B1_Mus1 | chr11 | 10100464 10100478 + | 0        | 0        | 0        |
| Simple_repeat  | Simple_repeat  | (A)n    | chr11 | 10100478 10100481 + | 0        | 0.761137 | 0        |
| SINE           | Alu            | B1_Mus2 | chr9  | 82043569 82043714 + | 0.591053 | 0.708814 | 0.615324 |
| Low_complexity | Low_complexity | A-rich  | chr9  | 82043715 82043814 + | 0.591053 | 0.708814 | 0.615324 |
| SINE           | Alu            | B1_Mm   | chr9  | 82202120 82202266 - | 0        | 0        | 0        |
| Simple_repeat  | Simple_repeat  | (A)n    | chr9  | 82266385 82266419 + | 0        | 0        | 0        |
| Simple_repeat  | Simple_repeat  | (A)n    | chr9  | 82532544 82532569 + | 0        | 0        | 0        |
| SINE           | Alu            | B1_Mus2 | chr9  | 82751554 82751699 - | 0        | 0        | 0        |
| SINE           | Alu            | B1_Mus1 | chr9  | 83496508 83496655 + | 0.591053 | 0.708814 | 0        |
| Simple_repeat  | Simple_repeat  | (A)n    | chr9  | 83523699 83523733 + | 0.591053 | 0        | 0        |
| SINE           | Alu            | B1_Mus1 | chr9  | 83526443 83526573 - | 0        | 0        | 0        |
| Simple_repeat  | Simple_repeat  | (A)n    | chr9  | 84174911 84174938 + | 0        | 0        | 0        |
| Simple_repeat  | Simple_repeat  | (A)n    | chr9  | 84279596 84279625 + | 0        | 0        | 0        |
| LINE           | L1             | Lx3_Mus | chr9  | 84308217 84312517 - | 0        | 0        | 0        |
| LTR            | MaLR           | MTA_Mm  | chr9  | 85015323 85015707 + | 0        | 0        | 0        |
| LTR            | MaLR           | MTA_Mm  | chr9  | 85087100 85087491 - | 0        | 0        | 0        |
| SINE           | Alu            | B1_Mus1 | chr9  | 85206814 85206966 + | 0        | 0        | 0        |
| Simple_repeat  | Simple_repeat  | (GAA)n  | chr9  | 85206968 85207069 + | 0        | 0        | 0        |
| Simple_repeat  | Simple_repeat  | (A)n    | chr9  | 85298142 85298174 + | 0        | 0        | 0        |
| Simple_repeat  | Simple_repeat  | (A)n    | chr9  | 85485563 85485591 + | 0        | 0        | 0        |
| SINE           | Alu            | B1_Mm   | chr9  | 85540958 85541105 + | 0        | 0        | 0        |
| Simple_repeat  | Simple_repeat  | (A)n    | chr9  | 85541106 85541125 + | 0        | 0        | 0        |
| LTR            | MaLR           | MTA_Mm  | chr9  | 85569376 85569770 - | 0        | 0        | 0        |
| Simple_repeat  | Simple_repeat  | (A)n    | chr9  | 85727125 85727160 + | 0        | 0        | 0        |
| LTR            | MaLR           | MTA_Mm  | chr9  | 85980437 85980832 + | 0        | 0        | 0        |
| LTR            | MaLR           | MTA_Mm  | chr9  | 86029465 86029858 - | 0        | 0        | 0        |
| LTR            | MaLR           | MTA_Mm  | chr9  | 86030957 86031350 - | 0        | 0        | 0        |
| LTR            | MaLR           | MTA_Mm  | chr9  | 87250535 87250928 + | 0        | 0        | 0        |
| Simple_repeat  | Simple_repeat  | (A)n    | chr9  | 87297754 87297780 + | 0        | 0        | 0        |
| SINE           | B4             | B4      | chr9  | 87323697 87323945 - | 0        | 0        | 0        |
| LINE           | L1             | Lx      | chr9  | 88196359 88201999 + | 0        | 0        | 0        |
| SINE           | Alu            | B1_Mm   | chr9  | 88435354 88435497 - | 0        | 0        | 0        |
| SINE           | Alu            | B1_Mus2 | chr9  | 88976380 88976524 + | 0        | 0        | 0        |
| SINE           | Alu            | B1_Mm   | chr9  | 88994319 88994468 + | 0        | 0        | 0        |
| Simple_repeat  | Simple_repeat  | (A)n    | chr9  | 88994469 88994499 + | 0        | 0        | 0        |
| LTR            | MaLR           | MTA_Mm  | chr9  | 89201810 89202207 + | 0.591053 | 0        | 0.615324 |
| LTR            | MaLR           | MTA_Mm  | chr9  | 89247070 89247457 - | 0        | 0        | 0        |
| LTR            | MaLR           | MTA_Mm  | chr9  | 89255768 89256155 - | 0        | 0        | 0        |
| SINE           | Alu            | B1_Mus2 | chr9  | 89260866 89261014 - | 0        | 0        | 0.615324 |
| SINE           | Alu            | B1_Mm   | chr9  | 89942533 89942678 + | 0        | 0        | 0        |
| Low_complexity | Low_complexity | A-rich  | chr9  | 89942679 89942763 + | 0        | 0        | 0        |
| SINE           | Alu            | B1_Mus2 | chr9  | 89978268 89978404 - | 1.18211  | 0.761137 | 0        |
| SINE           | Alu            | B1_Mus2 | chr9  | 90042441 90042586 + | 2.26557  | 1.01984  | 1.97174  |
| Simple_repeat  | Simple_repeat  | (A)n    | chr9  | 90042587 90042615 + | 2.26557  | 1.01984  | 1.97174  |
| SINE           | Alu            | B1_Mus2 | chr9  | 90463090 90463236 - | 0        | 0        | 0        |
| SINE           | B2             | B2_Mm1t | chr11 | 10157381 10157400 - | 0        | 0        | 0        |
| Simple_repeat  | Simple_repeat  | (A)n    | chr9  | 92720575 92720616 + | 0        | 0        | 0        |
| Simple_repeat  | Simple_repeat  | (A)n    | chr9  | 93038574 93038649 + | 0        | 0        | 0        |
| Simple_repeat  | Simple_repeat  | (A)n    | chr9  | 93336904 93336929 + | 0        | 0        | 0        |
| LINE           | L1             | L1Md_F2 | chr9  | 94019344 94023371 - | 0        | 0        | 0        |
| LTR            | MaLR           | MTA_Mm  | chr9  | 94512606 94512994 - | 0        | 0        | 0        |
| SINE           | Alu            | B1_Mus2 | chr9  | 95351793 95351939 + | 0        | 0        | 0        |
| Simple_repeat  | Simple_repeat  | (A)n    | chr9  | 95351940 95351962 + | 0        | 0        | 0        |
| SINE           | B2             | B2_Mm1a | chr9  | 96268057 96268246 - | 2.06356  | 0        | 0        |

|                |                |         |       |                     |          |          |          |
|----------------|----------------|---------|-------|---------------------|----------|----------|----------|
| SINE           | Alu            | B1_Mm   | chr9  | 96288649 96288795 + | 0        | 0        | 0        |
| Simple_repeat  | Simple_repeat  | (A)n    | chr9  | 96288796 96288821 + | 0        | 0        | 0        |
| Simple_repeat  | Simple_repeat  | (A)n    | chr9  | 96718666 96718695 + | 0        | 0.708814 | 0        |
| SINE           | Alu            | B1_Mus2 | chr11 | 10189010 10189025 - | 0        | 0        | 0        |
| SINE           | Alu            | B1_Mm   | chr9  | 97055340 97055487 + | 0        | 0        | 0        |
| SINE           | Alu            | B1_Mur3 | chr11 | 10191731 10191745 + | 0        | 0        | 0        |
| SINE           | Alu            | B1_Mus1 | chr9  | 98827422 98827572 - | 0.591053 | 0        | 0        |
| Simple_repeat  | Simple_repeat  | (A)n    | chr9  | 98832029 98832065 + | 0.332194 | 0        | 0        |
| LTR            | MaLR           | MTA_Mm  | chr9  | 99121751 99122135 + | 0        | 0        | 0        |
| SINE           | B2             | B2_Mm2  | chr9  | 99492689 99492862 - | 0        | 0        | 0        |
| LTR            | MaLR           | MTA_Mm  | chr9  | 99578774 99579168 - | 0        | 0        | 0        |
| SINE           | Alu            | B1_Mus2 | chr9  | 99584245 99584393 + | 0        | 0        | 0        |
| Simple_repeat  | Simple_repeat  | (A)n    | chr9  | 99584394 99584429 + | 0        | 0        | 0        |
| SINE           | Alu            | B1_Mus1 | chr11 | 10214340 10214355 + | 0        | 0        | 0        |
| Simple_repeat  | Simple_repeat  | (A)n    | chr11 | 10214355 10214358 + | 0        | 0        | 0        |
| SINE           | Alu            | B1_Mus2 | chr9  | 10047297 10047311 - | 0        | 0        | 0        |
| SINE           | Alu            | B1_Mus2 | chr9  | 10053328 10053343 - | 0        | 0        | 0        |
| SINE           | Alu            | B1_Mm   | chr11 | 10216314 10216328 + | 0        | 0        | 0        |
| Simple_repeat  | Simple_repeat  | (A)n    | chr11 | 10216328 10216332 + | 0        | 0        | 0        |
| Simple_repeat  | Simple_repeat  | (A)n    | chr9  | 10115842 10115846 + | 0        | 0        | 0        |
| Simple_repeat  | Simple_repeat  | (A)n    | chr11 | 10220343 10220345 + | 0        | 0        | 0        |
| SINE           | Alu            | B1_Mm   | chr11 | 10225156 10225170 + | 0        | 0        | 0        |
| Simple_repeat  | Simple_repeat  | (A)n    | chr11 | 10225170 10225175 + | 0        | 0        | 0        |
| SINE           | Alu            | B1_Mm   | chr9  | 10269506 10269520 - | 0        | 0        | 0        |
| SINE           | Alu            | B1_Mus1 | chr9  | 10300548 10300564 - | 0.591053 | 0        | 0        |
| LTR            | MaLR           | MTD     | chr9  | 10300685 10300728 + | 0        | 0        | 0        |
| SINE           | Alu            | B1_Mus2 | chr11 | 10242123 10242137 - | 0        | 0        | 0        |
| SINE           | Alu            | B1_Mm   | chr11 | 10243705 10243720 + | 0        | 0        | 0        |
| Simple_repeat  | Simple_repeat  | (A)n    | chr11 | 10244890 10244892 + | 0.591053 | 0        | 0.615324 |
| Simple_repeat  | Simple_repeat  | (A)n    | chr11 | 10245994 10245998 + | 0.332194 | 0        | 0        |
| LTR            | MaLR           | MTA_Mm  | chr9  | 10546139 10546178 - | 0        | 0        | 0        |
| LTR            | MaLR           | MTA_Mm  | chr9  | 10547731 10547770 + | 0        | 0        | 0        |
| SINE           | Alu            | B1_Mm   | chr9  | 10574039 10574053 - | 0        | 0        | 0        |
| SINE           | B2             | B2_Mm1a | chr9  | 10600794 10600813 + | 0        | 0        | 0.342623 |
| Simple_repeat  | Simple_repeat  | (A)n    | chr9  | 10600813 10600815 + | 0        | 0        | 0        |
| SINE           | Alu            | B1_Mus2 | chr9  | 10603770 10603784 + | 0        | 0        | 0        |
| Low_complexity | Low_complexity | A-rich  | chr9  | 10603784 10603789 + | 0        | 0        | 0        |
| SINE           | Alu            | B1_Mm   | chr9  | 10612264 10612278 + | 0        | 0        | 0        |
| LTR            | MaLR           | MTB     | chr9  | 10625466 10625504 + | 0        | 0        | 0        |
| SINE           | Alu            | B1_Mus1 | chr10 | 28724109 28724256 - | 0        | 0        | 0        |
| SINE           | Alu            | B1_Mm   | chr9  | 10820404 10820417 - | 0        | 0        | 1.23065  |
| SINE           | Alu            | B1_Mus2 | chr9  | 10824805 10824819 + | 0        | 0        | 0.615324 |
| SINE           | Alu            | B1_Mm   | chr9  | 10840646 10840661 - | 0        | 0        | 0        |
| SINE           | Alu            | B1_Mus2 | chr9  | 10856167 10856181 + | 0        | 0        | 0        |
| Simple_repeat  | Simple_repeat  | (A)n    | chr9  | 10856181 10856186 + | 0        | 0        | 0        |
| LINE           | L1             | L1Md_A  | chr9  | 10914750 10915457 - | 0.923247 | 0        | 0        |
| SINE           | Alu            | B1_Mus2 | chr9  | 10961284 10961299 - | 0        | 0        | 0        |
| Simple_repeat  | Simple_repeat  | (A)n    | chr9  | 10977767 10977771 + | 0        | 0        | 0        |
| SINE           | Alu            | B1_Mus1 | chr9  | 10981836 10981851 + | 0        | 0        | 0        |
| Simple_repeat  | Simple_repeat  | (A)n    | chr9  | 10981851 10981853 + | 0        | 0        | 0        |
| SINE           | Alu            | B1_Mus2 | chr11 | 10288580 10288593 - | 0        | 0        | 0        |
| SINE           | Alu            | B1_Mus2 | chr9  | 11043111 11043125 + | 0        | 0        | 0        |
| Simple_repeat  | Simple_repeat  | (A)n    | chr9  | 11043125 11043128 + | 0        | 0        | 0        |
| SINE           | B2             | B2_Mm1t | chr9  | 11069903 11069921 - | 0        | 0        | 0        |
| SINE           | Alu            | B1_Mus1 | chr9  | 11142407 11142422 - | 0        | 0        | 0        |
| Simple_repeat  | Simple_repeat  | (CCAA)n | chr9  | 11174160 11174163 + | 0        | 0        | 0        |
| Simple_repeat  | Simple_repeat  | (A)n    | chr9  | 11174163 11174167 + | 0        | 0        | 0        |
| LTR            | MaLR           | MTA_Mm  | chr9  | 11290739 11290778 + | 0.591053 | 0        | 0        |
| LTR            | ERVL           | RMER15  | chr11 | 10315778 10315837 + | 0        | 0        | 0        |
| Simple_repeat  | Simple_repeat  | (A)n    | chr9  | 11363485 11363488 + | 0        | 0        | 0        |
| Simple_repeat  | Simple_repeat  | (A)n    | chr9  | 11396215 11396217 + | 0        | 0        | 0        |
| Simple_repeat  | Simple_repeat  | (A)n    | chr9  | 11418057 11418061 + | 0        | 0        | 0        |
| scRNA          | scRNA          | 4.5SRNA | chr9  | 11458051 11458060 - | 40.5997  | 21.5213  | 21.4602  |
| SINE           | B2             | B2_Mm1a | chr11 | 10333390 10333410 + | 0        | 0        | 0        |
| Simple_repeat  | Simple_repeat  | (A)n    | chr11 | 10333410 10333412 + | 0.332194 | 0        | 0        |
| SINE           | Alu            | B1_Mus1 | chr9  | 11571403 11571417 + | 0        | 0        | 0        |
| Simple_repeat  | Simple_repeat  | (A)n    | chr9  | 11571417 11571427 + | 0        | 0        | 0        |

|                |                |         |       |                     |          |          |          |
|----------------|----------------|---------|-------|---------------------|----------|----------|----------|
| Simple_repeat  | Simple_repeat  | (A)n    | chr9  | 11577988 11577992 + | 0        | 0        | 0        |
| SINE           | Alu            | B1_Mus1 | chr9  | 11599436 11599451 - | 0        | 0        | 0        |
| SINE           | Alu            | B1_Mm   | chr10 | 28845289 28845435 + | 0        | 0        | 0        |
| LTR            | ERVK           | RLTR15  | chr9  | 11647872 11647900 - | 0        | 0        | 0        |
| SINE           | Alu            | B1_Mus2 | chr11 | 10362220 10362235 - | 0        | 0        | 0        |
| Simple_repeat  | Simple_repeat  | (A)n    | chr9  | 11786902 11786905 + | 0        | 0        | 0        |
| SINE           | Alu            | B1_Mus2 | chr9  | 11937524 11937538 - | 0        | 0        | 0        |
| Simple_repeat  | Simple_repeat  | (A)n    | chr9  | 12038848 12038851 + | 0        | 0.708814 | 0        |
| SINE           | Alu            | B1_Mm   | chr9  | 12044404 12044418 - | 0        | 0        | 0        |
| SINE           | Alu            | B1_Mus2 | chr9  | 12066168 12066182 + | 0        | 0        | 0        |
| SINE           | B2             | B2_Mm1a | chr9  | 12144150 12144169 - | 0        | 0        | 0        |
| Simple_repeat  | Simple_repeat  | (A)n    | chr9  | 12146979 12146983 + | 0        | 0        | 0        |
| SINE           | B2             | B2_Mm2  | chr9  | 12252102 12252117 + | 2.06418  | 1.08938  | 0        |
| Simple_repeat  | Simple_repeat  | (A)n    | chr9  | 12255155 12255161 + | 1.25544  | 0.761137 | 0.957947 |
| SINE           | B2             | B2_Mm1a | chr9  | 12306655 12306674 + | 0        | 0        | 0        |
| LTR            | MaLR           | MTA_Mm  | chr9  | 12313089 12313128 + | 0        | 0        | 0        |
| SINE           | Alu            | B1_Mus1 | chr9  | 12313857 12313872 - | 0        | 0        | 0        |
| SINE           | Alu            | B1_Mus2 | chr9  | 12338370 12338385 + | 0.332194 | 0        | 0.615324 |
| Simple_repeat  | Simple_repeat  | (A)n    | chr9  | 12338385 12338387 + | 0.332194 | 0        | 0.615324 |
| SINE           | Alu            | B1_Mm   | chrX  | 3770627 3770772 -   | 0        | 0        | 0        |
| LINE           | L1             | L1Md_T  | chrX  | 3836687 3843352 -   | 0        | 0        | 0        |
| SINE           | Alu            | B1_Mus2 | chrX  | 5655774 5655918 +   | 0        | 0        | 0        |
| Simple_repeat  | Simple_repeat  | (GAAA)n | chrX  | 5655919 5656005 +   | 0        | 0        | 0        |
| LTR            | MaLR           | MTB_Mm  | chrX  | 6933336 6933747 -   | 0        | 0        | 0        |
| SINE           | Alu            | B1_Mm   | chrX  | 7115294 7115440 -   | 0        | 0        | 0        |
| SINE           | Alu            | B1_Mus2 | chrX  | 7269834 7269957 -   | 0        | 0        | 0        |
| Simple_repeat  | Simple_repeat  | (TTTA)n | chrX  | 7292459 7292485 +   | 0        | 0        | 0        |
| SINE           | Alu            | B1_Mus1 | chrX  | 7526856 7527003 -   | 0        | 0        | 0        |
| SINE           | Alu            | B1_Mus1 | chrX  | 7570994 7571146 +   | 0        | 0        | 0        |
| LTR            | MaLR           | ORR1C2  | chrX  | 7571162 7571512 +   | 0        | 0        | 0        |
| LTR            | MaLR           | MTA_Mm  | chrX  | 7614098 7614490 -   | 0        | 0        | 0        |
| SINE           | Alu            | B1_Mm   | chrX  | 7668042 7668188 +   | 0        | 0        | 0        |
| Simple_repeat  | Simple_repeat  | (A)n    | chrX  | 7668189 7668213 +   | 0        | 0        | 0        |
| SINE           | Alu            | B1_Mur2 | chrX  | 7669740 7669887 +   | 0        | 0        | 0        |
| Low_complexity | Low_complexity | A-rich  | chrX  | 7669888 7669957 +   | 0        | 0        | 0        |
| SINE           | Alu            | B1_Mm   | chrX  | 7761042 7761190 -   | 1.84649  | 1.41763  | 0.615324 |
| LTR            | MaLR           | MTA_Mm  | chrX  | 9134901 9135296 +   | 0        | 0        | 0        |
| SINE           | Alu            | B1_Mm   | chr10 | 5748221 5748349 -   | 0        | 0        | 0        |
| LTR            | MaLR           | MTA_Mm  | chrX  | 9904355 9904750 -   | 0        | 0        | 0.615324 |
| SINE           | B2             | B2_Mm1t | chrX  | 10204472 10204672 - | 0        | 0        | 0        |
| SINE           | Alu            | B1_Mus1 | chrX  | 10383269 10383405 + | 0        | 0        | 0        |
| Simple_repeat  | Simple_repeat  | (A)n    | chrX  | 10383406 10383438 + | 0        | 0        | 0        |
| SINE           | Alu            | B1_Mm   | chrX  | 10407100 10407221 - | 0        | 0        | 0        |
| LINE           | L1             | Lx6     | chrX  | 10503178 10509625 - | 0        | 0        | 0        |
| Simple_repeat  | Simple_repeat  | (A)n    | chrX  | 10817999 10818034 + | 0        | 0        | 0        |
| LTR            | MaLR           | MTA_Mm  | chrX  | 11605626 11606020 + | 0        | 0        | 0        |
| SINE           | B4             | RSINE1  | chrX  | 11786086 11786243 - | 0        | 0        | 0        |
| SINE           | Alu            | B1_Mus2 | chrX  | 11964377 11964499 + | 0        | 0        | 0        |
| Simple_repeat  | Simple_repeat  | (A)n    | chrX  | 11964500 11964524 + | 0        | 0        | 0        |
| SINE           | B4             | ID_B1   | chrX  | 12136314 12136515 + | 0        | 0        | 0        |
| Simple_repeat  | Simple_repeat  | (A)n    | chrX  | 12136516 12136539 + | 0        | 0        | 0        |
| SINE           | Alu            | B1_Mm   | chrX  | 12146322 12146467 - | 0        | 0        | 0        |
| Low_complexity | Low_complexity | GA-rich | chrX  | 12406096 12406264 + | 0        | 0        | 0.685246 |
| SINE           | Alu            | B1_Mus1 | chrX  | 12588910 12589057 + | 0        | 0.380568 | 0        |
| Simple_repeat  | Simple_repeat  | (A)n    | chrX  | 12589058 12589077 + | 0        | 0.380568 | 0        |
| SINE           | Alu            | B1_Mus1 | chrX  | 12642007 12642153 - | 0        | 0        | 0        |
| SINE           | Alu            | B1_Mus1 | chrX  | 12848109 12848260 + | 0        | 0        | 0        |
| Simple_repeat  | Simple_repeat  | (A)n    | chrX  | 12848261 12848293 + | 0        | 0        | 0        |
| SINE           | Alu            | B1_Mur1 | chrX  | 13434375 13434541 + | 0        | 0        | 0.615324 |
| Simple_repeat  | Simple_repeat  | (A)n    | chrX  | 13434542 13434567 + | 0        | 0        | 0        |
| SINE           | Alu            | B1_Mm   | chrX  | 13473255 13473401 - | 0        | 0        | 0        |
| Simple_repeat  | Simple_repeat  | (A)n    | chrX  | 13867880 13867925 + | 0        | 0        | 0        |
| LINE           | L1             | L1Md_F2 | chrX  | 13978907 13984325 + | 0        | 0        | 0        |
| LINE           | L1             | L1_Mus3 | chrX  | 14107344 14113488 - | 0        | 0        | 0        |
| SINE           | Alu            | B1_Mm   | chrX  | 14128954 14129099 - | 0        | 0        | 0        |
| LINE           | L1             | L1_Mus1 | chrX  | 14442771 14447679 - | 0        | 0        | 0        |
| LTR            | MaLR           | MTA_Mm  | chrX  | 14602431 14602825 + | 0        | 0        | 0        |

|               |               |         |       |                     |          |          |          |
|---------------|---------------|---------|-------|---------------------|----------|----------|----------|
| Simple_repeat | Simple_repeat | (A)n    | chrX  | 15062422 15062462 + | 0        | 0        | 0        |
| SINE          | Alu           | B1_Mm   | chrX  | 17007823 17007952 + | 0.591053 | 0        | 0        |
| Simple_repeat | Simple_repeat | (A)n    | chrX  | 17007953 17007981 + | 0.591053 | 0        | 0        |
| SINE          | Alu           | PB1D9   | chrX  | 17547820 17547917 + | 0        | 0        | 0        |
| Simple_repeat | Simple_repeat | (A)n    | chrX  | 17547918 17547937 + | 0        | 0        | 0        |
| LINE          | L1            | MusHAL1 | chrX  | 18073917 18078596 - | 0        | 0        | 0        |
| LINE          | L1            | L1Md_T  | chrX  | 18763899 18770362 - | 0        | 0        | 0        |
| SINE          | Alu           | B1F     | chrX  | 18813069 18813172 + | 0        | 0        | 0        |
| SINE          | Alu           | B1_Mus1 | chrX  | 19051267 19051414 + | 0        | 0        | 0        |
| Simple_repeat | Simple_repeat | (A)n    | chrX  | 19051415 19051445 + | 0        | 0        | 0        |
| Simple_repeat | Simple_repeat | (A)n    | chrX  | 19086841 19086884 + | 0        | 0        | 0        |
| LTR           | MaLR          | MTA_Mm  | chrX  | 19117062 19117460 + | 0        | 0        | 0        |
| SINE          | Alu           | B1_Mus2 | chrX  | 19391514 19391659 + | 0        | 0        | 0        |
| Simple_repeat | Simple_repeat | (A)n    | chrX  | 19391660 19391684 + | 0        | 0        | 0        |
| SINE          | Alu           | B1_Mm   | chrX  | 19929425 19929582 - | 0        | 0        | 0        |
| SINE          | Alu           | B1_Mus1 | chrX  | 20158965 20159104 - | 0        | 0        | 0        |
| SINE          | Alu           | B1_Mus1 | chrX  | 20164798 20164932 + | 0        | 0        | 0        |
| Simple_repeat | Simple_repeat | (A)n    | chrX  | 20164933 20164962 + | 0        | 0        | 0        |
| SINE          | Alu           | B1_Mus2 | chrX  | 20337050 20337196 - | 0        | 0        | 0        |
| SINE          | Alu           | B1_Mm   | chrX  | 20363814 20363938 + | 0        | 0        | 0        |
| Simple_repeat | Simple_repeat | (A)n    | chrX  | 20363939 20363986 + | 0        | 0        | 0        |
| SINE          | Alu           | B1_Mus1 | chrX  | 20573732 20573879 - | 0        | 0.708814 | 0        |
| SINE          | Alu           | B1_Mm   | chrX  | 20990285 20990431 + | 0.591053 | 0        | 0        |
| SINE          | Alu           | B1_Mm   | chr11 | 10592422 10592435 + | 0.591053 | 0        | 0        |
| Simple_repeat | Simple_repeat | (A)n    | chr11 | 10592435 10592437 + | 0        | 0        | 0        |
| SINE          | B2            | B2_Mm1t | chrX  | 21049478 21049674 + | 0        | 0.708814 | 0        |
| SINE          | Alu           | PB1D9   | chrX  | 21178408 21178529 + | 0        | 0        | 0.615324 |
| Simple_repeat | Simple_repeat | (A)n    | chrX  | 21518832 21518870 + | 0        | 0        | 0        |
| LTR           | MaLR          | MTA_Mm  | chrX  | 22422718 22423114 + | 0        | 0        | 0        |
| Simple_repeat | Simple_repeat | (A)n    | chrX  | 22671925 22671959 + | 0        | 0        | 0        |
| LINE          | L1            | L1Md_F2 | chrX  | 23425380 23431778 - | 0        | 0        | 0        |
| LINE          | L1            | L1_Mus1 | chrX  | 24200568 24205958 - | 0        | 0        | 0        |
| LINE          | L1            | L1_Mus1 | chrX  | 24307301 24313511 + | 0        | 0        | 0        |
| SINE          | Alu           | B1_Mur3 | chrX  | 24615743 24615888 + | 0        | 0        | 0        |
| Simple_repeat | Simple_repeat | (A)n    | chrX  | 24615889 24615921 + | 0        | 0        | 0        |
| LINE          | L1            | L1_Mus1 | chrX  | 24947154 24952958 + | 0        | 0        | 0        |
| Simple_repeat | Simple_repeat | (A)n    | chrX  | 25145525 25145565 + | 0        | 0        | 0        |
| LINE          | L1            | L1_Mus1 | chrX  | 25222976 25228779 + | 0        | 0        | 0        |
| LINE          | L1            | L1Md_F  | chrX  | 25510300 25516367 - | 0        | 0        | 0        |
| Simple_repeat | Simple_repeat | (A)n    | chrX  | 26547155 26547196 + | 0        | 0        | 0        |
| Simple_repeat | Simple_repeat | (A)n    | chrX  | 27315557 27315611 + | 0        | 0        | 0        |
| LINE          | L1            | L1Md_F3 | chrX  | 27397079 27402517 + | 0        | 0        | 0        |
| SINE          | Alu           | B1_Mur3 | chrX  | 27483384 27483529 - | 0        | 0        | 0        |
| LINE          | L1            | L1Md_F2 | chrX  | 27492770 27497960 + | 0        | 0        | 0        |
| LINE          | L1            | L1Md_F3 | chrX  | 28397342 28402766 + | 0        | 0        | 0        |
| SINE          | Alu           | B1_Mur3 | chrX  | 28483635 28483780 - | 0        | 0        | 0        |
| LINE          | L1            | L1Md_F2 | chrX  | 28493021 28498206 + | 0        | 0        | 0        |
| SINE          | Alu           | B1_Mur3 | chrX  | 29246009 29246154 + | 0        | 0        | 0        |
| Simple_repeat | Simple_repeat | (A)n    | chrX  | 29246155 29246181 + | 0        | 0        | 0        |
| SINE          | Alu           | B1_Mur3 | chrX  | 29581740 29581885 + | 0        | 0        | 0        |
| Simple_repeat | Simple_repeat | (A)n    | chrX  | 29581886 29581925 + | 0        | 0        | 0        |
| LINE          | L1            | L1_Mus1 | chrX  | 29591169 29597144 - | 0        | 0        | 0        |
| SINE          | Alu           | B1_Mur3 | chrX  | 29837398 29837543 - | 0        | 0        | 0        |
| SINE          | Alu           | B1_Mus2 | chrX  | 29839263 29839409 - | 0        | 0        | 0        |
| LINE          | L1            | L1Md_F2 | chrX  | 29846793 29852177 + | 0        | 0        | 0        |
| Simple_repeat | Simple_repeat | (A)n    | chrX  | 30009446 30009488 + | 0        | 0        | 0        |
| SINE          | Alu           | B1_Mm   | chrX  | 30620851 30620996 - | 0        | 0        | 0        |
| SINE          | Alu           | B1_Mm   | chrX  | 31723097 31723242 + | 0        | 0        | 0        |
| LINE          | L1            | L1Md_F2 | chrX  | 32366460 32372830 - | 0        | 0        | 0        |
| SINE          | Alu           | B1_Mus2 | chrX  | 32380214 32380360 + | 0        | 0        | 0        |
| Simple_repeat | Simple_repeat | (A)n    | chrX  | 32380361 32380383 + | 0        | 0.380568 | 0        |
| SINE          | Alu           | B1_Mur3 | chrX  | 32382080 32382225 + | 0        | 0        | 0        |
| Simple_repeat | Simple_repeat | (A)n    | chrX  | 32382226 32382253 + | 0        | 0        | 0        |
| LINE          | L1            | L1_Mus1 | chrX  | 32987990 32994830 - | 0        | 0        | 0        |
| LTR           | MaLR          | MTA_Mm  | chrX  | 33286170 33286576 + | 0        | 0        | 0        |
| SINE          | Alu           | B1_Mm   | chr11 | 10658035 10658049 + | 0        | 0        | 0        |
| Simple_repeat | Simple_repeat | (A)n    | chr11 | 10658049 10658051 + | 0        | 0        | 0        |

|               |               |         |       |                     |          |   |          |
|---------------|---------------|---------|-------|---------------------|----------|---|----------|
| LTR           | MaLR          | MTA_Mm  | chrX  | 34078088 34078483 + | 0        | 0 | 0        |
| SINE          | Alu           | B1_Mus1 | chrX  | 34343866 34343994 - | 0        | 0 | 0        |
| SINE          | ID            | ID4     | chrX  | 35225096 35225167 - | 0        | 0 | 0        |
| SINE          | Alu           | B1_Mus1 | chrX  | 35941676 35941878 + | 0        | 0 | 0        |
| LINE          | L1            | L1_Mus2 | chrX  | 36094670 36100852 - | 0        | 0 | 0        |
| LINE          | L1            | L1_Mus2 | chrX  | 37142544 37147876 - | 0        | 0 | 0.342623 |
| LINE          | L1            | L1_Mus1 | chrX  | 38126202 38130691 - | 0        | 0 | 0        |
| Simple_repeat | Simple_repeat | (A)n    | chrX  | 38357175 38357224 + | 0        | 0 | 0        |
| LTR           | MaLR          | MTA_Mm  | chrX  | 38598062 38598457 - | 0        | 0 | 0        |
| LINE          | L1            | L1Md_T  | chrX  | 39052200 39059066 - | 0        | 0 | 0        |
| SINE          | Alu           | B1_Mm   | chr11 | 10687144 10687158 - | 0        | 0 | 0        |
| SINE          | Alu           | B1_Mus1 | chr11 | 10687548 10687562 - | 0        | 0 | 0        |
| LINE          | L1            | L1Md_T  | chrX  | 39342191 39348979 - | 0        | 0 | 0        |
| SINE          | Alu           | B1_Mus1 | chrX  | 39396760 39396910 + | 0        | 0 | 0        |
| Simple_repeat | Simple_repeat | (A)n    | chrX  | 39396911 39396934 + | 0        | 0 | 0        |
| Simple_repeat | Simple_repeat | (A)n    | chrX  | 39709152 39709197 + | 0        | 0 | 0        |
| SINE          | Alu           | B1_Mm   | chr11 | 10702019 10702034 - | 0        | 0 | 0        |
| LTR           | MaLR          | MTA_Mm  | chrX  | 41802739 41803120 - | 0        | 0 | 0        |
| Simple_repeat | Simple_repeat | (A)n    | chrX  | 42599160 42599199 + | 0        | 0 | 0        |
| LINE          | L1            | L1Md_F2 | chrX  | 42925892 42931989 - | 0        | 0 | 0        |
| Simple_repeat | Simple_repeat | (A)n    | chrX  | 43109274 43109317 + | 0        | 0 | 0        |
| SINE          | Alu           | B1_Mus2 | chrX  | 43856437 43856582 + | 0        | 0 | 0        |
| SINE          | Alu           | B1_Mus2 | chrX  | 43888567 43888711 + | 0        | 0 | 0        |
| LTR           | MaLR          | MTA_Mm  | chrX  | 44329039 44329429 + | 0        | 0 | 0        |
| LTR           | MaLR          | MTA_Mm  | chrX  | 44337179 44337574 + | 0        | 0 | 0        |
| SINE          | Alu           | B1_Mus1 | chrX  | 44975345 44975470 - | 0        | 0 | 0        |
| SINE          | Alu           | B1_Mus2 | chrX  | 45678722 45678867 - | 0        | 0 | 0        |
| SINE          | Alu           | B1_Mus2 | chrX  | 45689743 45689895 - | 0        | 0 | 0        |
| LTR           | MaLR          | MTA_Mm  | chrX  | 46080407 46080794 - | 0        | 0 | 0        |
| LINE          | L1            | L1Md_T  | chrX  | 46961262 46967207 - | 0        | 0 | 0        |
| SINE          | Alu           | B1_Mus2 | chrX  | 47251474 47251615 + | 0        | 0 | 0        |
| Simple_repeat | Simple_repeat | (A)n    | chrX  | 47251616 47251638 + | 0        | 0 | 0        |
| SINE          | Alu           | B1_Mus1 | chrX  | 47261607 47261754 - | 0        | 0 | 0        |
| SINE          | Alu           | B1_Mm   | chr11 | 10736596 10736611 - | 0        | 0 | 0        |
| LTR           | MaLR          | MTA_Mm  | chrX  | 49043878 49044271 - | 0        | 0 | 0        |
| SINE          | Alu           | B1_Mus1 | chrX  | 49204450 49204596 - | 0        | 0 | 0        |
| LTR           | MaLR          | MTA_Mm  | chrX  | 49288228 49288623 + | 0        | 0 | 0        |
| SINE          | Alu           | B1_Mus2 | chrX  | 49617011 49617156 - | 0        | 0 | 0        |
| SINE          | Alu           | B1_Mus2 | chrX  | 50205098 50205244 + | 0        | 0 | 0        |
| Simple_repeat | Simple_repeat | (A)n    | chrX  | 50264906 50264934 + | 0.332194 | 0 | 0        |
| LTR           | MaLR          | MTA_Mm  | chrX  | 50386753 50387148 + | 0        | 0 | 0        |
| SINE          | Alu           | B1F     | chrX  | 50737008 50737155 - | 0        | 0 | 0        |
| LINE          | L1            | L1Md_T  | chrX  | 50961676 50968149 - | 0        | 0 | 0        |
| SINE          | Alu           | PB1D7   | chrX  | 51027592 51027696 + | 0        | 0 | 0        |
| Simple_repeat | Simple_repeat | (A)n    | chrX  | 51027697 51027742 + | 0        | 0 | 0        |
| SINE          | Alu           | B1_Mm   | chr11 | 10759158 10759172 + | 0        | 0 | 0        |
| Simple_repeat | Simple_repeat | (A)n    | chr11 | 10759172 10759175 + | 0        | 0 | 0        |
| LTR           | MaLR          | MTA_Mm  | chrX  | 53135811 53136205 - | 0        | 0 | 0        |
| LTR           | MaLR          | MTA_Mm  | chrX  | 53588379 53588776 + | 0        | 0 | 0        |
| SINE          | Alu           | B1_Mus1 | chr10 | 29583105 29583238 - | 0        | 0 | 0        |
| SINE          | Alu           | PB1D9   | chrX  | 54102827 54102929 - | 0        | 0 | 0        |
| LTR           | MaLR          | MTA_Mm  | chrX  | 54813850 54814245 + | 0        | 0 | 0        |
| Simple_repeat | Simple_repeat | (A)n    | chrX  | 55319184 55319219 + | 0        | 0 | 0        |
| LTR           | MaLR          | MTA_Mm  | chrX  | 55473941 55474336 + | 0        | 0 | 0        |
| Simple_repeat | Simple_repeat | (A)n    | chrX  | 56176249 56176281 + | 0        | 0 | 0        |
| LTR           | MaLR          | MTA_Mm  | chrX  | 56477498 56477880 + | 0        | 0 | 0        |
| LINE          | L1            | L1Md_T  | chrX  | 56713325 56719726 - | 0        | 0 | 0        |
| LTR           | MaLR          | MTA_Mm  | chrX  | 57179252 57179646 - | 0        | 0 | 0        |
| LTR           | MaLR          | MTA_Mm  | chrX  | 57436692 57437081 - | 0        | 0 | 0.615324 |
| LTR           | MaLR          | MTA_Mm  | chrX  | 57438158 57438503 - | 0        | 0 | 0        |
| SINE          | Alu           | B1_Mm   | chrX  | 57866645 57866781 - | 0        | 0 | 0        |
| LINE          | L1            | L1Md_T  | chrX  | 58512383 58519652 - | 0        | 0 | 0        |
| LINE          | L1            | L1Md_T  | chrX  | 59215611 59222799 - | 0.332194 | 0 | 0        |
| Simple_repeat | Simple_repeat | (A)n    | chrX  | 59876571 59876616 + | 0        | 0 | 0        |
| LTR           | MaLR          | MTA_Mm  | chrX  | 59965929 59966323 - | 0        | 0 | 0        |
| LINE          | L1            | L1Md_F  | chrX  | 59972643 59977359 + | 0        | 0 | 0        |
| LTR           | MaLR          | MTA_Mm  | chrX  | 60230004 60230399 + | 0        | 0 | 0        |

|                |                |         |       |                     |          |          |          |
|----------------|----------------|---------|-------|---------------------|----------|----------|----------|
| SINE           | Alu            | B1_Mus2 | chrX  | 60427427 60427572 - | 0        | 0        | 0        |
| Simple_repeat  | Simple_repeat  | (A)n    | chrX  | 60813562 60813605 + | 0        | 0        | 0        |
| Simple_repeat  | Simple_repeat  | (A)n    | chrX  | 60837569 60837604 + | 0        | 0        | 0        |
| SINE           | Alu            | B1_Mus2 | chrX  | 61237437 61237559 + | 0        | 0        | 0.615324 |
| Simple_repeat  | Simple_repeat  | (A)n    | chrX  | 61237560 61237602 + | 0        | 0        | 0        |
| SINE           | Alu            | B1_Mm   | chr10 | 29692060 29692191 + | 0        | 0        | 0        |
| Simple_repeat  | Simple_repeat  | (A)n    | chr10 | 29692192 29692215 + | 0        | 0        | 0        |
| LINE           | L1             | L1_Mus1 | chrX  | 61717733 61724157 - | 0        | 0        | 0        |
| LINE           | L1             | L1Md_T  | chrX  | 61879182 61886544 - | 0        | 0        | 0        |
| SINE           | Alu            | B1_Mur3 | chr11 | 10872521 10872536 + | 0.332194 | 0        | 0        |
| Simple_repeat  | Simple_repeat  | (A)n    | chr11 | 10872536 10872539 + | 0.332194 | 0        | 0        |
| SINE           | Alu            | B1_Mur4 | chr11 | 10873767 10873781 - | 0        | 0        | 0        |
| SINE           | Alu            | B1_Mm   | chrX  | 63079770 63079915 + | 0        | 0        | 0        |
| Simple_repeat  | Simple_repeat  | (A)n    | chrX  | 63079916 63079944 + | 0        | 0        | 0        |
| LINE           | L1             | L1_Mus3 | chrX  | 63131420 63135933 - | 0        | 0        | 0        |
| Simple_repeat  | Simple_repeat  | (A)n    | chrX  | 63755098 63755134 + | 0        | 0        | 0        |
| SINE           | Alu            | B1_Mus1 | chrX  | 63928201 63928351 + | 0        | 0        | 0        |
| Simple_repeat  | Simple_repeat  | (A)n    | chrX  | 63928352 63928374 + | 0        | 0        | 0        |
| Simple_repeat  | Simple_repeat  | (A)n    | chrX  | 64128922 64128985 + | 0        | 0        | 0        |
| LTR            | ERVK           | RMER19A | chrX  | 64297207 64297972 - | 0        | 0        | 0        |
| LTR            | MaLR           | MTA_Mm  | chrX  | 64680136 64680531 + | 0        | 0        | 0        |
| Simple_repeat  | Simple_repeat  | (A)n    | chrX  | 64715038 64715072 + | 0        | 0        | 0        |
| LINE           | L1             | L1_Mus3 | chrX  | 64734841 64741556 - | 0        | 0        | 0        |
| Simple_repeat  | Simple_repeat  | (A)n    | chrX  | 64856642 64856675 + | 0        | 0        | 0        |
| SINE           | Alu            | B1_Mus2 | chrX  | 64861314 64861460 + | 0        | 0        | 0        |
| Simple_repeat  | Simple_repeat  | (A)n    | chrX  | 64861461 64861486 + | 0        | 0        | 0        |
| LINE           | L1             | L1Md_F2 | chrX  | 65145337 65151454 - | 0.591053 | 0        | 0        |
| SINE           | Alu            | B1_Mus2 | chr11 | 10890723 10890738 + | 0        | 0        | 0        |
| Simple_repeat  | Simple_repeat  | (A)n    | chr11 | 10890738 10890740 + | 0        | 0        | 0        |
| SINE           | Alu            | B1_Mus2 | chrX  | 65977044 65977190 - | 0        | 0        | 0        |
| Simple_repeat  | Simple_repeat  | (A)n    | chrX  | 66259233 66259270 + | 0        | 0        | 0.615324 |
| LINE           | L1             | L1Md_F2 | chrX  | 66524249 66530303 - | 0        | 0        | 0        |
| LTR            | MaLR           | MTA_Mm  | chrX  | 67662882 67663277 + | 0        | 0        | 0        |
| LTR            | MaLR           | MTA_Mm  | chrX  | 67783413 67783808 - | 0        | 0        | 0        |
| LTR            | MaLR           | MTA_Mm  | chrX  | 67808526 67808920 + | 0.332194 | 0        | 0        |
| SINE           | Alu            | B1_Mus2 | chrX  | 68767453 68767599 + | 0        | 0        | 0        |
| Simple_repeat  | Simple_repeat  | (A)n    | chrX  | 68767600 68767693 + | 0        | 0        | 0        |
| SINE           | Alu            | B1_Mus1 | chrX  | 68784359 68784493 - | 0        | 0        | 0        |
| SINE           | Alu            | B1_Mm   | chrX  | 68828398 68828544 + | 0        | 0        | 0        |
| Simple_repeat  | Simple_repeat  | (A)n    | chrX  | 68828545 68828604 + | 0        | 0        | 0        |
| LTR            | MaLR           | MTA_Mm  | chrX  | 68881198 68881585 + | 0        | 0        | 0        |
| SINE           | Alu            | B1_Mm   | chr11 | 10916289 10916303 + | 0        | 0        | 0        |
| Simple_repeat  | Simple_repeat  | (A)n    | chr11 | 10916303 10916306 + | 0        | 0        | 0        |
| Simple_repeat  | Simple_repeat  | (A)n    | chrX  | 69274495 69274534 + | 0        | 0        | 0        |
| Simple_repeat  | Simple_repeat  | (A)n    | chrX  | 70285603 70285632 + | 0        | 0        | 0        |
| Simple_repeat  | Simple_repeat  | (A)n    | chrX  | 70308217 70308258 + | 0        | 0        | 0        |
| SINE           | Alu            | B1_Mus2 | chrX  | 70996175 70996320 + | 0        | 0        | 0        |
| Simple_repeat  | Simple_repeat  | (A)n    | chrX  | 70996321 70996344 + | 0        | 0        | 0        |
| SINE           | Alu            | B1_Mus2 | chrX  | 71508204 71508350 - | 0        | 0        | 0        |
| SINE           | Alu            | B1_Mus1 | chrX  | 71537784 71537937 + | 1.18211  | 0.380568 | 1.23065  |
| Simple_repeat  | Simple_repeat  | (A)n    | chrX  | 71537938 71537973 + | 1.18211  | 0.380568 | 0.615324 |
| SINE           | Alu            | B1_Mm   | chrX  | 71808214 71808360 - | 0        | 0        | 0        |
| SINE           | Alu            | B1_Mus1 | chrX  | 72024375 72024496 + | 0        | 0        | 0        |
| Simple_repeat  | Simple_repeat  | (A)n    | chrX  | 72024497 72024519 + | 0        | 0        | 0        |
| Simple_repeat  | Simple_repeat  | (A)n    | chrX  | 72720343 72720378 + | 0        | 0        | 0        |
| SINE           | Alu            | B1_Mm   | chrX  | 72951365 72951511 + | 0        | 0        | 0        |
| LINE           | L1             | L1Md_F  | chrX  | 73500002 73504695 - | 0        | 0        | 0        |
| LTR            | MaLR           | MTA_Mm  | chrX  | 73880287 73880681 - | 0        | 0        | 0        |
| LTR            | MaLR           | MTA_Mm  | chrX  | 75061481 75061879 - | 0        | 0        | 0        |
| SINE           | Alu            | B1_Mus1 | chrX  | 75178080 75178227 + | 0        | 0        | 0        |
| Low_complexity | Low_complexity | A-rich  | chrX  | 75178228 75178289 + | 0        | 0        | 0        |
| Simple_repeat  | Simple_repeat  | (A)n    | chrX  | 75438289 75438323 + | 0        | 0        | 0        |
| Simple_repeat  | Simple_repeat  | (A)n    | chrX  | 75583441 75583477 + | 0        | 0        | 0        |
| LTR            | MaLR           | MTA_Mm  | chrX  | 76045662 76046056 + | 0        | 0.380568 | 0        |
| LTR            | MaLR           | MTA_Mm  | chrX  | 76229316 76229699 - | 0        | 0        | 0        |
| LTR            | MaLR           | MTA_Mm  | chrX  | 76231748 76232142 - | 0        | 0        | 0        |
| SINE           | Alu            | B1_Mus2 | chrX  | 76253395 76253539 + | 0        | 0        | 0        |

|               |               |         |       |                     |          |          |          |
|---------------|---------------|---------|-------|---------------------|----------|----------|----------|
| Simple_repeat | Simple_repeat | (GAAA)n | chrX  | 76253540 76253605 + | 0        | 0        | 0        |
| SINE          | Alu           | B1_Mus1 | chrX  | 76461738 76461884 - | 0        | 0        | 0        |
| SINE          | Alu           | B1_Mus2 | chrX  | 76651152 76651298 - | 0        | 0        | 0        |
| LTR           | MaLR          | MTA_Mm  | chrX  | 76843725 76844122 + | 0        | 0        | 0        |
| SINE          | Alu           | B1_Mus1 | chrX  | 76951577 76951724 - | 0        | 0        | 0        |
| SINE          | Alu           | B1_Mus1 | chrX  | 77024945 77025092 - | 0        | 0        | 0        |
| Simple_repeat | Simple_repeat | (A)n    | chrX  | 77642740 77642796 + | 0        | 0        | 0        |
| LTR           | MaLR          | MTA_Mm  | chrX  | 77953157 77953551 - | 0        | 0        | 0        |
| LINE          | L1            | L1Md_T  | chrX  | 78204440 78212164 - | 0        | 0        | 0        |
| LINE          | L1            | L1Md_F2 | chrX  | 78423161 78429108 - | 0        | 0        | 0        |
| LTR           | MaLR          | MTA_Mm  | chrX  | 78548413 78548803 - | 0        | 0        | 0        |
| SINE          | Alu           | B1_Mm   | chr10 | 29869878 29870023 - | 0        | 0        | 0        |
| LTR           | MaLR          | MTA_Mm  | chrX  | 78652855 78653250 + | 0        | 0        | 0        |
| SINE          | Alu           | B1_Mm   | chrX  | 78986725 78986871 + | 0        | 0        | 0        |
| LTR           | MaLR          | MTA_Mm  | chrX  | 79158298 79158693 + | 0        | 0        | 0.615324 |
| Simple_repeat | Simple_repeat | (A)n    | chrX  | 79247284 79247320 + | 0        | 0        | 0        |
| LTR           | MaLR          | MTA_Mm  | chrX  | 79374472 79374867 + | 0        | 0        | 0        |
| LTR           | MaLR          | MTA_Mm  | chrX  | 80023819 80024213 - | 0        | 0        | 0        |
| SINE          | Alu           | B1_Mm   | chrX  | 80140508 80140654 + | 2.10535  | 2.50701  | 2.4613   |
| Simple_repeat | Simple_repeat | (A)n    | chrX  | 80140655 80140675 + | 2.10535  | 1.41763  | 2.4613   |
| LTR           | MaLR          | MTB     | chrX  | 80144189 80144567 + | 0.591053 | 0        | 1.91589  |
| LINE          | L1            | Lx3_Mus | chr10 | 29889781 29895175 - | 0        | 0        | 0.342623 |
| LTR           | MaLR          | MTA_Mm  | chrX  | 83205945 83206339 - | 0        | 0        | 0        |
| SINE          | Alu           | B1_Mm   | chrX  | 83331486 83331627 + | 0        | 0        | 0        |
| SINE          | Alu           | B1_Mus1 | chrX  | 83505415 83505560 + | 0        | 0        | 0        |
| Simple_repeat | Simple_repeat | (A)n    | chrX  | 85403345 85403392 + | 0        | 0        | 0        |
| LINE          | L1            | L1_Mus1 | chrX  | 85801837 85806940 + | 0        | 0        | 0        |
| LTR           | MaLR          | MTA_Mm  | chrX  | 85936259 85936653 - | 0        | 0        | 0        |
| SINE          | Alu           | B1_Mm   | chrX  | 85960298 85960443 - | 0        | 0        | 0        |
| Simple_repeat | Simple_repeat | (A)n    | chrX  | 86362277 86362314 + | 0        | 0        | 0        |
| SINE          | Alu           | B1_Mus1 | chrX  | 86635814 86635960 - | 0        | 0.708814 | 0        |
| SINE          | Alu           | B1_Mus2 | chrX  | 86680092 86680238 + | 0        | 0        | 0        |
| Simple_repeat | Simple_repeat | (A)n    | chrX  | 86680239 86680301 + | 0        | 0        | 0        |
| SINE          | Alu           | B1_Mus1 | chrX  | 87031589 87031735 - | 0        | 0        | 0        |
| SINE          | Alu           | B1_Mm   | chrX  | 87038185 87038330 - | 0        | 0        | 0        |
| Simple_repeat | Simple_repeat | (A)n    | chrX  | 87433908 87433951 + | 0        | 0        | 0        |
| Simple_repeat | Simple_repeat | (A)n    | chrX  | 87442213 87442248 + | 0        | 0        | 0        |
| SINE          | Alu           | B1_Mus1 | chrX  | 88463756 88463902 + | 0        | 0        | 0        |
| Simple_repeat | Simple_repeat | (A)n    | chrX  | 88463903 88463928 + | 0        | 0        | 0        |
| LTR           | MaLR          | MTA_Mm  | chrX  | 88603630 88604027 + | 0        | 0        | 0        |
| SINE          | Alu           | B1_Mus2 | chrX  | 88750534 88750626 + | 0        | 0        | 0        |
| Simple_repeat | Simple_repeat | (A)n    | chrX  | 88750627 88750661 + | 0        | 0        | 0        |
| Simple_repeat | Simple_repeat | (A)n    | chr11 | 11075235 11075239 + | 0        | 0        | 0        |
| SINE          | Alu           | B1_Mus2 | chrX  | 90392811 90392957 - | 0        | 0        | 0        |
| SINE          | Alu           | B1_Mus2 | chrX  | 91288957 91289103 - | 0        | 0        | 0        |
| Simple_repeat | Simple_repeat | (A)n    | chrX  | 91309011 91309050 + | 0        | 0.380568 | 0        |
| SINE          | Alu           | PB1D7   | chrX  | 91386993 91387110 - | 0        | 0        | 0        |
| SINE          | Alu           | B1_Mur3 | chrX  | 91396885 91397031 - | 0        | 0        | 0        |
| SINE          | Alu           | B1_Mus2 | chrX  | 91459263 91459409 - | 0        | 0        | 0        |
| SINE          | Alu           | B1_Mur1 | chrX  | 91535037 91535176 - | 0        | 0        | 0        |
| SINE          | Alu           | B1_Mus1 | chrX  | 91904744 91904890 + | 0        | 0        | 0        |
| Simple_repeat | Simple_repeat | (A)n    | chr11 | 11111208 11111210 + | 0        | 0        | 0        |
| SINE          | Alu           | B1_Mus1 | chrX  | 92833285 92833431 + | 0        | 0        | 0        |
| Simple_repeat | Simple_repeat | (A)n    | chrX  | 92833432 92833473 + | 0        | 0        | 0        |
| Simple_repeat | Simple_repeat | (A)n    | chr11 | 11120949 11120952 + | 0        | 0        | 0        |
| SINE          | Alu           | B1_Mus1 | chrX  | 93184887 93185033 + | 0        | 0        | 0        |
| Simple_repeat | Simple_repeat | (A)n    | chrX  | 93185034 93185081 + | 0        | 0        | 0        |
| LTR           | MaLR          | MTA_Mm  | chrX  | 93940612 93941006 - | 0        | 0        | 0        |
| LTR           | MaLR          | MTA_Mm  | chrX  | 93982441 93982836 + | 0        | 0        | 0        |
| LINE          | L1            | L1VL4   | chrX  | 94975429 94978333 - | 0        | 0        | 0        |
| LINE          | L1            | L1Md_T  | chrX  | 95164412 95171295 - | 0        | 0        | 0        |
| LTR           | MaLR          | MTA_Mm  | chrX  | 95731169 95731563 + | 0        | 0        | 0        |
| Simple_repeat | Simple_repeat | (A)n    | chrX  | 96666216 96666258 + | 0        | 0.380568 | 0.342623 |
| LINE          | L1            | L1Md_T  | chrX  | 97954332 97960794 - | 0        | 0        | 0        |
| SINE          | Alu           | B1_Mm   | chrX  | 98549137 98549289 + | 0        | 0        | 0        |
| Simple_repeat | Simple_repeat | (A)n    | chrX  | 98549290 98549314 + | 0        | 0        | 0        |
| SINE          | Alu           | B1_Mus1 | chrX  | 98678722 98678869 + | 0.591053 | 0        | 0        |



|                |                |         |       |                     |          |          |          |
|----------------|----------------|---------|-------|---------------------|----------|----------|----------|
| Simple_repeat  | Simple_repeat  | (A)n    | chrX  | 98678870 98678898 + | 0.591053 | 0        | 0        |
| SINE           | Alu            | B1_Mus2 | chrX  | 98721081 98721227 - | 0        | 0        | 0        |
| SINE           | Alu            | B1_Mus1 | chrX  | 98727146 98727293 - | 0        | 0        | 0        |
| SINE           | Alu            | B1_Mus2 | chrX  | 98826874 98827020 - | 0        | 0        | 0        |
| SINE           | Alu            | B1F     | chrX  | 99000096 99000245 - | 0        | 0        | 0        |
| SINE           | Alu            | B1_Mm   | chrX  | 99356474 99356620 - | 0        | 0        | 0        |
| SINE           | Alu            | B1_Mm   | chrX  | 10046250 10046264 - | 0        | 0        | 0        |
| Simple_repeat  | Simple_repeat  | (A)n    | chrX  | 10047744 10047748 + | 0        | 0        | 0        |
| SINE           | Alu            | B1_Mus2 | chrX  | 10052782 10052797 + | 0        | 0        | 0        |
| Simple_repeat  | Simple_repeat  | (A)n    | chrX  | 10052797 10052799 + | 0        | 0        | 0        |
| SINE           | Alu            | B1_Mm   | chrX  | 10054123 10054135 + | 0        | 0        | 0        |
| Simple_repeat  | Simple_repeat  | (A)n    | chrX  | 10060565 10060568 + | 0        | 0        | 0        |
| SINE           | Alu            | B1_Mm   | chrX  | 10070424 10070439 + | 1.05163  | 0.380568 | 0        |
| Low_complexity | Low_complexity | A-rich  | chrX  | 10070439 10070449 + | 0        | 0.380568 | 0        |
| SINE           | Alu            | B1_Mus2 | chrX  | 10075420 10075434 - | 0.591053 | 0        | 0        |
| LTR            | MaLR           | MTA_Mm  | chr11 | 11215109 11215148 - | 0        | 0        | 0        |
| SINE           | Alu            | B1_Mm   | chr11 | 11215765 11215777 + | 0        | 0        | 0        |
| Simple_repeat  | Simple_repeat  | (A)n    | chr11 | 11215777 11215781 + | 0        | 0.380568 | 0        |
| SINE           | Alu            | B1_Mus2 | chrX  | 10143576 10143591 + | 0        | 0        | 0        |
| Simple_repeat  | Simple_repeat  | (A)n    | chrX  | 10143591 10143594 + | 0        | 0        | 0        |
| SINE           | Alu            | B1_Mus2 | chrX  | 10166401 10166416 - | 0        | 0        | 0        |
| SINE           | Alu            | B1_Mus2 | chrX  | 10187851 10187866 - | 0        | 0        | 0        |
| Simple_repeat  | Simple_repeat  | (A)n    | chrX  | 10221520 10221523 + | 0        | 0        | 0        |
| LINE           | L1             | L1Md_F2 | chrX  | 10245206 10245725 + | 0        | 0        | 0        |
| LTR            | MaLR           | MTA_Mm  | chrX  | 10264049 10264088 - | 0        | 0        | 0        |
| Simple_repeat  | Simple_repeat  | (A)n    | chrX  | 10285325 10285333 + | 0        | 0        | 0        |
| SINE           | Alu            | B1_Mus2 | chrX  | 10338026 10338041 - | 0        | 0        | 0        |
| LINE           | L1             | L1_Mus2 | chrX  | 10354308 10354887 + | 0        | 0        | 0        |
| SINE           | B2             | B2_Mm2  | chrX  | 10411166 10411185 - | 0        | 0        | 0        |
| LTR            | MaLR           | MTA_Mm  | chrX  | 10493383 10493422 - | 0        | 0        | 0        |
| SINE           | Alu            | B1_Mm   | chrX  | 10520670 10520685 - | 0        | 0        | 0        |
| Simple_repeat  | Simple_repeat  | (A)n    | chrX  | 10527906 10527910 + | 0        | 0        | 0        |
| Simple_repeat  | Simple_repeat  | (A)n    | chrX  | 10542883 10542887 + | 0        | 0        | 0        |
| Simple_repeat  | Simple_repeat  | (A)n    | chrX  | 10548623 10548629 + | 0        | 0        | 0        |
| LTR            | MaLR           | MTB     | chrX  | 10554752 10554796 - | 0        | 0        | 0        |
| LTR            | MaLR           | MTA_Mm  | chrX  | 10665685 10665724 - | 0        | 0        | 0        |
| SINE           | Alu            | B1_Mm   | chrX  | 10670172 10670189 - | 0        | 0        | 0        |
| Simple_repeat  | Simple_repeat  | (A)n    | chrX  | 10712103 10712105 + | 0        | 0        | 0        |
| SINE           | Alu            | B1_Mm   | chrX  | 10745892 10745906 - | 0        | 0        | 0        |
| SINE           | Alu            | B1_Mm   | chrX  | 10836966 10836981 + | 0        | 0        | 0        |
| Simple_repeat  | Simple_repeat  | (A)n    | chrX  | 10836981 10836983 + | 0        | 0        | 0        |
| Simple_repeat  | Simple_repeat  | (TTTA)n | chrX  | 10882031 10882035 + | 0        | 0        | 0        |
| LTR            | MaLR           | MTA_Mm  | chrX  | 10931748 10931788 + | 0        | 0        | 0        |
| Simple_repeat  | Simple_repeat  | (GAA)n  | chr11 | 11289099 11289111 + | 0        | 0        | 0        |
| LINE           | L1             | L1_Mus1 | chrX  | 10983472 10984064 - | 0        | 0        | 0        |
| Simple_repeat  | Simple_repeat  | (A)n    | chrX  | 11101654 11101658 + | 0        | 0        | 0        |
| LINE           | L1             | L1_Mus1 | chrX  | 11127549 11128171 + | 0        | 0        | 0        |
| LTR            | MaLR           | MTA_Mm  | chrX  | 11130627 11130666 - | 0        | 0        | 0        |
| LINE           | L1             | L1Md_T  | chrX  | 11137429 11138163 - | 0        | 0        | 0        |
| LINE           | L1             | L1VL4   | chrX  | 11196169 11196664 - | 0        | 0        | 0        |
| Simple_repeat  | Simple_repeat  | (A)n    | chrX  | 11381326 11381330 + | 0        | 0        | 0        |
| SINE           | Alu            | B1_Mm   | chrX  | 11390320 11390335 - | 0        | 0        | 0        |
| LINE           | L1             | L1Md_F2 | chrX  | 11402905 11403545 - | 0        | 0        | 0        |
| Simple_repeat  | Simple_repeat  | (A)n    | chrX  | 11422895 11422902 + | 0        | 0        | 0        |
| Simple_repeat  | Simple_repeat  | (A)n    | chrX  | 11517966 11517969 + | 0        | 0        | 0        |
| LINE           | L1             | L1_Mus2 | chrX  | 11554416 11554876 - | 0        | 0        | 0        |
| LTR            | MaLR           | MTA_Mm  | chrX  | 11575523 11575563 + | 0        | 0        | 0        |
| LINE           | L1             | L1Md_F2 | chrX  | 11586980 11587588 - | 0        | 0        | 0        |
| Simple_repeat  | Simple_repeat  | (A)n    | chrX  | 11607090 11607093 + | 0        | 0        | 0        |
| SINE           | Alu            | B1_Mm   | chr11 | 11348949 11348963 + | 1.5143   | 0        | 0.615324 |
| SINE           | Alu            | B1_Mm   | chrX  | 11713125 11713140 - | 0        | 0        | 0        |
| Simple_repeat  | Simple_repeat  | (A)n    | chrX  | 11715772 11715775 + | 0        | 0        | 0        |
| LINE           | L1             | L1Md_T  | chrX  | 11807278 11807926 - | 0        | 0        | 0        |
| Simple_repeat  | Simple_repeat  | (A)n    | chrX  | 11822297 11822302 + | 0.332194 | 0        | 0        |
| SINE           | Alu            | B1_Mus1 | chrX  | 11846744 11846759 + | 0        | 0        | 0        |
| Simple_repeat  | Simple_repeat  | (A)n    | chrX  | 11846759 11846762 + | 0        | 0        | 0        |
| Simple_repeat  | Simple_repeat  | (A)n    | chrX  | 11863382 11863386 + | 0        | 0        | 0        |

|                |                |          |       |          |            |          |          |          |
|----------------|----------------|----------|-------|----------|------------|----------|----------|----------|
| SINE           | Alu            | B1_Mm    | chr11 | 11361402 | 11361416 + | 0        | 0        | 0        |
| Simple_repeat  | Simple_repeat  | (A)n     | chr11 | 11361416 | 11361418 + | 0        | 0        | 0        |
| Simple_repeat  | Simple_repeat  | (A)n     | chrX  | 11902958 | 11902962 + | 0        | 0        | 0        |
| Simple_repeat  | Simple_repeat  | (A)n     | chr10 | 30343343 | 30343377 + | 0        | 0        | 0.342623 |
| SINE           | Alu            | B1_Mus1  | chrX  | 11928538 | 11928553 + | 0        | 0        | 0        |
| Simple_repeat  | Simple_repeat  | (A)n     | chrX  | 11928553 | 11928560 + | 0        | 0        | 0        |
| LINE           | L1             | L1Md_F2  | chrX  | 11934612 | 11935158 + | 0        | 0        | 0        |
| SINE           | Alu            | B1_Mus1  | chrX  | 11938701 | 11938717 + | 0        | 0        | 0        |
| Low_complexity | Low_complexity | AT-rich  | chrX  | 11938717 | 11938720 + | 0        | 0        | 0        |
| SINE           | Alu            | B1_Mus2  | chr11 | 11363572 | 11363586 + | 0        | 0        | 0        |
| Simple_repeat  | Simple_repeat  | (A)n     | chr11 | 11363586 | 11363589 + | 0        | 0        | 0        |
| SINE           | Alu            | B1_Mus1  | chrX  | 11993797 | 11993812 + | 0        | 0        | 0        |
| Simple_repeat  | Simple_repeat  | (A)n     | chrX  | 11993812 | 11993816 + | 0        | 0        | 0        |
| Simple_repeat  | Simple_repeat  | (A)n     | chrX  | 12016307 | 12016309 + | 0        | 0        | 0        |
| Simple_repeat  | Simple_repeat  | (GGAA)n  | chrX  | 12016309 | 12016319 + | 0        | 0        | 0        |
| Low_complexity | Low_complexity | GA-rich  | chrX  | 12018698 | 12018707 + | 0        | 0        | 0        |
| LTR            | MaLR           | MTA_Mm   | chr10 | 30353161 | 30353551 - | 0        | 0        | 0        |
| SINE           | Alu            | B1_Mus1  | chrX  | 12044259 | 12044274 - | 0        | 0        | 0        |
| Simple_repeat  | Simple_repeat  | (GAAA)n  | chrX  | 12059983 | 12059997 + | 0        | 0        | 0        |
| Low_complexity | Low_complexity | A-rich   | chrX  | 12060564 | 12060572 + | 0.591053 | 0        | 0        |
| SINE           | Alu            | B1_Mus1  | chrX  | 12067209 | 12067223 - | 0        | 0        | 0.615324 |
| SINE           | Alu            | B1_Mm    | chrX  | 12074235 | 12074249 + | 0        | 0        | 0        |
| Simple_repeat  | Simple_repeat  | (A)n     | chrX  | 12074249 | 12074254 + | 0        | 0        | 0        |
| SINE           | Alu            | B1_Mus1  | chrX  | 12082075 | 12082090 + | 0        | 0        | 0        |
| Simple_repeat  | Simple_repeat  | (GAAA)n  | chrX  | 12082090 | 12082103 + | 0        | 0        | 0        |
| Low_complexity | Low_complexity | A-rich   | chrX  | 12083258 | 12083266 + | 0        | 0        | 0        |
| Simple_repeat  | Simple_repeat  | (A)n     | chrX  | 12084894 | 12084897 + | 0.332194 | 0.380568 | 0        |
| Simple_repeat  | Simple_repeat  | (A)n     | chrX  | 12090357 | 12090362 + | 0        | 0        | 0        |
| Simple_repeat  | Simple_repeat  | (GAAA)n  | chrX  | 12104027 | 12104040 + | 0        | 0        | 0        |
| Simple_repeat  | Simple_repeat  | (A)n     | chrX  | 12105187 | 12105191 + | 0        | 0        | 0        |
| SINE           | Alu            | B1_Mus1  | chrX  | 12132437 | 12132451 + | 0        | 0        | 0        |
| Low_complexity | Low_complexity | GA-rich  | chrX  | 12132451 | 12132465 + | 0        | 0        | 0        |
| SINE           | Alu            | B1_Mus1  | chrX  | 12133787 | 12133801 + | 0        | 0        | 0        |
| Simple_repeat  | Simple_repeat  | (A)n     | chrX  | 12133802 | 12133804 + | 0        | 0        | 0        |
| SINE           | Alu            | B1_Mus2  | chrX  | 12142364 | 12142379 - | 0        | 0        | 0        |
| SINE           | Alu            | B1_Mus1  | chrX  | 12161183 | 12161198 - | 0        | 0        | 0        |
| Simple_repeat  | Simple_repeat  | (GAAA)n  | chrX  | 12185339 | 12185352 + | 0        | 0        | 0        |
| Low_complexity | Low_complexity | A-rich   | chrX  | 12186535 | 12186544 + | 0        | 0        | 0        |
| Simple_repeat  | Simple_repeat  | (GAAA)n  | chrX  | 12197314 | 12197327 + | 0        | 0        | 0        |
| Simple_repeat  | Simple_repeat  | (A)n     | chrX  | 12198245 | 12198250 + | 0        | 0        | 0        |
| SINE           | Alu            | B1_Mus2  | chrX  | 12203903 | 12203918 + | 0        | 0        | 0        |
| Low_complexity | Low_complexity | A-rich   | chrX  | 12203918 | 12203926 + | 0        | 0        | 0        |
| Simple_repeat  | Simple_repeat  | (A)n     | chrX  | 12207733 | 12207736 + | 0        | 0        | 0        |
| Simple_repeat  | Simple_repeat  | (A)n     | chrX  | 12258899 | 12258903 + | 0        | 0        | 0        |
| SINE           | Alu            | B1_Mm    | chrX  | 12269768 | 12269783 - | 0.332194 | 0        | 0.615324 |
| LTR            | MaLR           | MTA_Mm   | chrX  | 12303050 | 12303090 - | 0        | 0        | 0        |
| LINE           | L1             | L1_Mus3  | chrX  | 12311133 | 12311724 - | 0        | 0        | 0        |
| SINE           | Alu            | B1_Mm    | chrX  | 12364054 | 12364068 + | 0        | 0        | 0        |
| Simple_repeat  | Simple_repeat  | (A)n     | chrX  | 12364068 | 12364071 + | 0        | 0        | 0        |
| Simple_repeat  | Simple_repeat  | (A)n     | chrX  | 12367979 | 12367982 + | 0        | 0        | 0        |
| LTR            | ERVK           | RMER17D2 | chrX  | 12376591 | 12376682 - | 0        | 0        | 0        |
| LINE           | L1             | L1_Mus2  | chrX  | 12377677 | 12378252 - | 0        | 0        | 0        |
| LTR            | MaLR           | MTA_Mm   | chrX  | 12380100 | 12380139 - | 0        | 0        | 0        |
| LTR            | MaLR           | MTA_Mm   | chrX  | 12428413 | 12428452 - | 0        | 0        | 0        |
| LINE           | L1             | L1Md_F2  | chrX  | 12439704 | 12440227 + | 0        | 0        | 0        |
| SINE           | Alu            | B1_Mus2  | chr11 | 11409151 | 11409165 - | 0        | 0        | 0        |
| SINE           | Alu            | B1_Mus1  | chrX  | 12536123 | 12536137 - | 0        | 0        | 0        |
| Simple_repeat  | Simple_repeat  | (A)n     | chrX  | 12602919 | 12602924 + | 0.591053 | 0        | 0        |
| SINE           | Alu            | B1_Mus2  | chrX  | 12705050 | 12705064 + | 0        | 0        | 0        |
| Simple_repeat  | Simple_repeat  | (A)n     | chrX  | 12719865 | 12719869 + | 0        | 0        | 0        |
| SINE           | Alu            | B1_Mm    | chrX  | 12751221 | 12751236 + | 0        | 0        | 0        |
| Simple_repeat  | Simple_repeat  | (TTTA)n  | chrX  | 12833580 | 12833586 + | 0        | 0        | 0        |
| SINE           | Alu            | B1_Mm    | chrX  | 12846020 | 12846034 + | 0        | 0        | 0        |
| Simple_repeat  | Simple_repeat  | (A)n     | chrX  | 12846034 | 12846038 + | 0        | 0        | 0        |
| SINE           | Alu            | B1_Mm    | chrX  | 12851886 | 12851900 - | 0        | 0        | 0        |
| Simple_repeat  | Simple_repeat  | (A)n     | chrX  | 12859188 | 12859192 + | 0        | 0        | 0        |
| Simple_repeat  | Simple_repeat  | (A)n     | chrX  | 12948744 | 12948748 + | 0        | 0        | 0        |

|                |                |         |       |                     |          |          |          |
|----------------|----------------|---------|-------|---------------------|----------|----------|----------|
| SINE           | Alu            | B1_Mus2 | chrX  | 12954976 12954991 + | 0        | 0        | 0        |
| Simple_repeat  | Simple_repeat  | (A)n    | chrX  | 12954991 12954995 + | 0        | 0        | 0        |
| Simple_repeat  | Simple_repeat  | (A)n    | chrX  | 12972357 12972360 + | 0        | 0        | 0        |
| SINE           | Alu            | B1F1    | chr11 | 11446734 11446748 - | 0.332194 | 0        | 0        |
| SINE           | B2             | B2_Mm1a | chr11 | 11446778 11446797 - | 0        | 0        | 0        |
| LINE           | L1             | L1Md_F  | chrX  | 13056866 13057404 - | 0        | 0        | 0        |
| Simple_repeat  | Simple_repeat  | (A)n    | chr11 | 11452898 11452901 + | 0        | 0        | 0        |
| LTR            | MaLR           | MTA_Mm  | chrX  | 13092913 13092953 - | 0        | 0        | 0        |
| SINE           | Alu            | B1_Mus1 | chr11 | 11453608 11453622 + | 0        | 0        | 0        |
| Simple_repeat  | Simple_repeat  | (A)n    | chr11 | 11453622 11453625 + | 0        | 0        | 0        |
| Simple_repeat  | Simple_repeat  | (TTTA)n | chrX  | 13101170 13101172 + | 0        | 0        | 0        |
| LTR            | MaLR           | MTA_Mm  | chrX  | 13138925 13138965 - | 0        | 0        | 0        |
| LTR            | MaLR           | MTB     | chrX  | 13239302 13239340 - | 0        | 0        | 0        |
| LTR            | MaLR           | MTB     | chrX  | 13280012 13280050 - | 0        | 0        | 0        |
| SINE           | Alu            | B1_Mus1 | chrX  | 13280873 13280887 + | 0        | 0        | 0        |
| Simple_repeat  | Simple_repeat  | (A)n    | chrX  | 13280887 13280889 + | 0        | 0        | 0        |
| SINE           | Alu            | B1_Mm   | chrX  | 13320716 13320731 + | 0        | 0        | 0        |
| Simple_repeat  | Simple_repeat  | (A)n    | chrX  | 13320731 13320734 + | 0        | 0        | 0        |
| SINE           | Alu            | B1_Mus2 | chrX  | 13322542 13322557 + | 0        | 0        | 0        |
| Simple_repeat  | Simple_repeat  | (A)n    | chrX  | 13322557 13322560 + | 0        | 0        | 0        |
| SINE           | Alu            | B1_Mus1 | chr11 | 11470984 11470999 - | 0        | 0        | 0        |
| SINE           | Alu            | B1_Mus2 | chrX  | 13374475 13374490 + | 0        | 0        | 0        |
| Simple_repeat  | Simple_repeat  | (A)n    | chrX  | 13374490 13374496 + | 0        | 0        | 0        |
| SINE           | Alu            | B1_Mus1 | chrX  | 13592512 13592527 - | 0        | 0        | 0.615324 |
| Simple_repeat  | Simple_repeat  | (A)n    | chrX  | 13733528 13733536 + | 0        | 0        | 0        |
| LINE           | L1             | L1Md_T  | chrX  | 13825530 13826156 - | 0        | 0        | 0        |
| SINE           | Alu            | B1_Mus2 | chrX  | 13828480 13828495 - | 0        | 0        | 0        |
| LINE           | L1             | L1Md_F2 | chrX  | 13846608 13847226 - | 0        | 0        | 0        |
| SINE           | Alu            | B1_Mus2 | chrX  | 13882910 13882925 - | 0        | 0        | 0        |
| SINE           | Alu            | B1_Mus1 | chr10 | 30548091 30548236 + | 0        | 0        | 0        |
| Simple_repeat  | Simple_repeat  | (A)n    | chr10 | 30548237 30548272 + | 0        | 0.708814 | 0        |
| SINE           | Alu            | B1_Mus2 | chrX  | 13949225 13949240 + | 1.05163  | 0        | 0        |
| Simple_repeat  | Simple_repeat  | (A)n    | chrX  | 13949240 13949246 + | 0        | 0        | 0.685246 |
| Simple_repeat  | Simple_repeat  | (A)n    | chrX  | 13967094 13967100 + | 0.591053 | 0        | 0        |
| SINE           | Alu            | B1_Mus2 | chrX  | 14071482 14071497 - | 0        | 0        | 0        |
| Low_complexity | Low_complexity | AT_rich | chrX  | 14072383 14072386 + | 0        | 0        | 0        |
| LTR            | MaLR           | MTA_Mm  | chrX  | 14073316 14073355 - | 0        | 0        | 0        |
| SINE           | Alu            | B1_Mus2 | chrX  | 14164145 14164159 + | 0        | 0        | 0        |
| Simple_repeat  | Simple_repeat  | (A)n    | chrX  | 14164159 14164165 + | 0        | 0        | 0        |
| SINE           | Alu            | PB1D10  | chrX  | 14204665 14204675 - | 0.591053 | 0        | 0        |
| LINE           | L1             | L1Md_F2 | chrX  | 14258308 14258827 + | 0        | 0        | 0        |
| LTR            | MaLR           | MTD     | chrX  | 14263548 14263591 - | 0.591053 | 0        | 0        |
| SINE           | Alu            | B1_Mm   | chr11 | 11541286 11541301 + | 0        | 0        | 0        |
| Simple_repeat  | Simple_repeat  | (A)n    | chr11 | 11541301 11541303 + | 0        | 0        | 0        |
| SINE           | Alu            | B1_Mm   | chr11 | 11541879 11541893 + | 0        | 0        | 0        |
| LINE           | L1             | L1Md_F2 | chrX  | 14318003 14318646 - | 0        | 0        | 0        |
| Simple_repeat  | Simple_repeat  | (A)n    | chrX  | 14387704 14387710 + | 1.49234  | 1.08938  | 2.29225  |
| LTR            | MaLR           | MTA_Mm  | chrX  | 14388900 14388939 + | 0        | 0        | 0        |
| LTR            | MaLR           | MTA_Mm  | chrX  | 14401103 14401141 + | 0        | 0        | 0        |
| LTR            | MaLR           | MTA_Mm  | chrX  | 14435337 14435376 - | 0        | 0        | 0        |
| Simple_repeat  | Simple_repeat  | (A)n    | chrX  | 14435530 14435534 + | 0        | 0        | 0        |
| LTR            | MaLR           | MTA_Mm  | chrX  | 14453421 14453460 - | 0        | 0        | 0        |
| LTR            | MaLR           | MTA_Mm  | chrX  | 14502244 14502283 - | 0        | 0        | 0        |
| LTR            | MaLR           | MTA_Mm  | chrX  | 14521425 14521464 - | 0        | 0        | 0        |
| LTR            | MaLR           | MTA_Mm  | chrX  | 14543466 14543505 - | 0        | 0        | 0        |
| LTR            | MaLR           | MTA_Mm  | chrX  | 14580602 14580641 - | 0        | 0        | 0        |
| Simple_repeat  | Simple_repeat  | (A)n    | chrX  | 14601306 14601313 + | 0        | 0        | 0        |
| SINE           | B2             | B2_Mm2  | chr11 | 11558649 11558666 - | 0        | 0        | 0        |
| LTR            | MaLR           | MTA_Mm  | chrX  | 14614186 14614225 - | 0        | 0        | 0        |
| SINE           | B2             | B3A     | chr11 | 11558667 11558685 - | 0        | 0        | 0        |
| LTR            | MaLR           | MTA_Mm  | chrX  | 14650921 14650960 - | 0        | 0        | 0        |
| SINE           | Alu            | B1_Mm   | chrX  | 14731590 14731605 - | 0        | 0        | 0        |
| Low_complexity | Low_complexity | A-rich  | chrX  | 14757958 14757969 + | 0        | 0        | 0        |
| SINE           | Alu            | B1_Mus2 | chr11 | 11574620 11574634 - | 0        | 0        | 0        |
| SINE           | Alu            | B1_Mus1 | chrX  | 14854515 14854529 - | 0        | 0.708814 | 0        |
| SINE           | Alu            | B1_Mus2 | chrX  | 14872220 14872234 + | 0        | 0        | 0        |
| SINE           | Alu            | B1_Mus1 | chr11 | 11587730 11587744 + | 0        | 0        | 0        |

|               |               |         |       |                     |          |   |          |
|---------------|---------------|---------|-------|---------------------|----------|---|----------|
| Simple_repeat | Simple_repeat | (A)n    | chr11 | 11587744 11587746 + | 0        | 0 | 0        |
| SINE          | Alu           | B1_Mus1 | chr11 | 11588010 11588025 - | 0        | 0 | 0        |
| SINE          | Alu           | B1_Mus1 | chrX  | 14961957 14961971 + | 0        | 0 | 0        |
| Simple_repeat | Simple_repeat | (A)n    | chrX  | 14961972 14961974 + | 0        | 0 | 0        |
| SINE          | Alu           | B1_Mus1 | chr10 | 30692962 30693116 - | 0        | 0 | 0        |
| SINE          | Alu           | B1_Mus1 | chrX  | 14999472 14999487 + | 0        | 0 | 0        |
| Simple_repeat | Simple_repeat | (A)n    | chrX  | 14999487 14999489 + | 0        | 0 | 0        |
| SINE          | Alu           | B1_Mus1 | chr11 | 11595726 11595740 - | 0        | 0 | 0        |
| LTR           | MaLR          | MTB     | chrX  | 15023086 15023126 + | 0        | 0 | 0        |
| Simple_repeat | Simple_repeat | (A)n    | chrX  | 15125927 15125931 + | 0        | 0 | 0        |
| SINE          | Alu           | B1_Mus1 | chrX  | 15220092 15220105 - | 0        | 0 | 0.342623 |
| SINE          | Alu           | B1_Mus1 | chr11 | 11610218 11610232 + | 0        | 0 | 0        |
| Simple_repeat | Simple_repeat | (A)n    | chr11 | 11610232 11610236 + | 0        | 0 | 0        |
| Simple_repeat | Simple_repeat | (A)n    | chrX  | 15349261 15349267 + | 0        | 0 | 0        |
| SINE          | Alu           | B1_Mm   | chrX  | 15449087 15449102 + | 0        | 0 | 0        |
| LINE          | L1            | L1Md_F2 | chrX  | 15468543 15469046 + | 0.591053 | 0 | 0        |
| Simple_repeat | Simple_repeat | (A)n    | chrX  | 15502188 15502192 + | 0        | 0 | 0        |
| SINE          | Alu           | B1_Mus1 | chr11 | 11632991 11633004 - | 0        | 0 | 0        |
| LINE          | L1            | L1Md_F2 | chrX  | 15659235 15659773 + | 0        | 0 | 0        |
| SINE          | Alu           | B1_Mm   | chrX  | 15659860 15659875 - | 0        | 0 | 0        |
| SINE          | Alu           | B1_Mus1 | chr11 | 11636532 11636547 - | 0.591053 | 0 | 0        |
| SINE          | Alu           | B1_Mm   | chr11 | 11637809 11637824 - | 0        | 0 | 0        |
| LINE          | L1            | L1Md_T  | chrX  | 15749425 15750000 - | 0.332194 | 0 | 0        |
| SINE          | Alu           | B1_Mm   | chr11 | 11649491 11649506 + | 0        | 0 | 0        |
| LTR           | MaLR          | MTA_Mm  | chr11 | 11649663 11649701 - | 0        | 0 | 0        |
| SINE          | Alu           | B1_Mus2 | chr11 | 11649722 11649736 - | 0        | 0 | 0        |
| SINE          | Alu           | B1_Mus2 | chrX  | 15865757 15865772 - | 0        | 0 | 0        |
| SINE          | Alu           | B1_Mus2 | chrX  | 15926851 15926866 - | 0        | 0 | 0        |
| LTR           | MaLR          | MTA_Mm  | chr11 | 11660440 11660479 + | 0        | 0 | 0        |
| LINE          | L1            | L1_Mus1 | chrX  | 15951394 15951901 - | 0        | 0 | 0        |
| SINE          | Alu           | B1_Mm   | chr11 | 11663996 11664010 + | 0        | 0 | 0        |
| Simple_repeat | Simple_repeat | (A)n    | chr11 | 11664010 11664013 + | 0        | 0 | 0        |
| SINE          | Alu           | B1_Mus1 | chrX  | 15977820 15977834 - | 0        | 0 | 0        |
| scRNA         | scRNA         | BC1_Mm  | chrX  | 16055790 16055802 - | 0        | 0 | 0        |
| SINE          | Alu           | B1_Mus2 | chrX  | 16087286 16087300 + | 0        | 0 | 0        |
| Simple_repeat | Simple_repeat | (A)n    | chrX  | 16087301 16087303 + | 0        | 0 | 0        |
| SINE          | Alu           | B1_Mus1 | chrX  | 16128536 16128551 + | 0        | 0 | 0        |
| Simple_repeat | Simple_repeat | (A)n    | chrX  | 16128551 16128554 + | 0        | 0 | 0        |
| SINE          | Alu           | B1_Mm   | chr11 | 11677128 11677143 + | 0        | 0 | 0        |
| Simple_repeat | Simple_repeat | (A)n    | chr11 | 11677143 11677145 + | 0        | 0 | 0        |
| Simple_repeat | Simple_repeat | (A)n    | chrX  | 16189651 16189654 + | 0        | 0 | 0        |
| SINE          | Alu           | B1_Mm   | chrX  | 16196589 16196604 - | 0        | 0 | 0        |
| Simple_repeat | Simple_repeat | (A)n    | chrX  | 16197557 16197561 + | 0        | 0 | 0        |
| SINE          | Alu           | B1_Mur3 | chrX  | 16256984 16257002 + | 0        | 0 | 0        |
| SINE          | Alu           | B1_Mm   | chr11 | 11692252 11692267 - | 0        | 0 | 0        |
| SINE          | Alu           | B1_Mur3 | chr11 | 11702582 11702596 - | 0        | 0 | 0        |
| SINE          | Alu           | B1_Mus1 | chrX  | 16589731 16589747 + | 0        | 0 | 0        |
| Simple_repeat | Simple_repeat | (A)n    | chrX  | 16589747 16589753 + | 0        | 0 | 0        |
| LINE          | L1            | L1_Mus2 | chrX  | 16596766 16597288 + | 0.332194 | 0 | 0        |
| SINE          | Alu           | B1_Mus2 | chr11 | 11744371 11744386 + | 0        | 0 | 0        |
| Simple_repeat | Simple_repeat | (A)n    | chr11 | 11744386 11744388 + | 0        | 0 | 0        |
| SINE          | Alu           | B1_Mus1 | chr11 | 11751316 11751327 - | 0        | 0 | 0        |
| SINE          | Alu           | B1_Mm   | chr11 | 11783899 11783912 + | 0        | 0 | 0        |
| Simple_repeat | Simple_repeat | (A)n    | chr11 | 11783912 11783918 + | 0        | 0 | 0        |
| SINE          | Alu           | B1_Mm   | chr11 | 11824201 11824216 + | 0        | 0 | 0        |
| Simple_repeat | Simple_repeat | (A)n    | chr11 | 11824216 11824220 + | 0        | 0 | 0        |
| SINE          | Alu           | B1_Mus1 | chr11 | 11832857 11832871 + | 0        | 0 | 0        |
| LTR           | ERVK          | RLTR16  | chr11 | 11832872 11832915 + | 0        | 0 | 0        |
| LTR           | MaLR          | MTA_Mm  | chr11 | 11833041 11833081 - | 0        | 0 | 0        |
| LTR           | MaLR          | MTB     | chr11 | 11887292 11887331 - | 0        | 0 | 0        |
| SINE          | B2            | B2_Mm1a | chr11 | 12001506 12001525 - | 0.591053 | 0 | 0        |
| Simple_repeat | Simple_repeat | (A)n    | chr11 | 12016920 12016927 + | 0        | 0 | 0        |
| SINE          | Alu           | B1_Mur4 | chr10 | 5887709 5887856 -   | 0        | 0 | 0        |
| SINE          | Alu           | B1_Mus2 | chr11 | 12129228 12129243 - | 0        | 0 | 0        |
| LINE          | L1            | L1Md_A  | chrY  | 805303 810787 -     | 0        | 0 | 0        |
| LINE          | L1            | L1Md_A  | chrY  | 885815 891300 -     | 0        | 0 | 0        |
| LTR           | MaLR          | MTA_Mm  | chrY  | 990967 991380 +     | 0        | 0 | 0        |

|               |               |         |       |          |          |   |          |          |          |
|---------------|---------------|---------|-------|----------|----------|---|----------|----------|----------|
| LINE          | L1            | L1Md_T  | chrY  | 1102872  | 1109956  | - | 0        | 0        | 0        |
| Simple_repeat | Simple_repeat | (A)n    | chrY  | 1253690  | 1253732  | + | 0        | 0        | 0        |
| Simple_repeat | Simple_repeat | (A)n    | chrY  | 1994334  | 1994367  | + | 0        | 0        | 0        |
| SINE          | Alu           | B1_Mus1 | chrY  | 2007789  | 2007927  | - | 0        | 0        | 0        |
| LINE          | L1            | L1Md_A  | chrY  | 2537057  | 2541534  | + | 0.664388 | 0.380568 | 0.342623 |
| LTR           | MaLR          | MTA_Mm  | chr12 | 3233234  | 3233623  | - | 1.18211  | 0.708814 | 0        |
| Simple_repeat | Simple_repeat | (A)n    | chr12 | 3347811  | 3347859  | + | 0        | 0        | 0        |
| SINE          | Alu           | B1_Mus1 | chr12 | 3511646  | 3511792  | + | 0.591053 | 0        | 0        |
| Simple_repeat | Simple_repeat | (A)n    | chr12 | 3511793  | 3511833  | + | 0        | 0        | 0        |
| SINE          | Alu           | B1_Mm   | chr12 | 3530796  | 3530942  | - | 0        | 0        | 0        |
| SINE          | Alu           | B1_Mus1 | chr12 | 3800718  | 3800862  | + | 0        | 0        | 0        |
| Simple_repeat | Simple_repeat | (A)n    | chr12 | 3800863  | 3800890  | + | 0        | 0        | 0        |
| LTR           | MaLR          | MTA_Mm  | chr12 | 4549728  | 4550121  | + | 0        | 0        | 0        |
| Simple_repeat | Simple_repeat | (A)n    | chr12 | 4561680  | 4561713  | + | 0.332194 | 0        | 0        |
| SINE          | Alu           | B1_Mus1 | chr12 | 5647165  | 5647299  | + | 0        | 1.01984  | 0.615324 |
| Simple_repeat | Simple_repeat | (A)n    | chr12 | 5647300  | 5647336  | + | 0        | 1.01984  | 0        |
| SINE          | Alu           | B1_Mus2 | chr12 | 5765325  | 5765470  | - | 0        | 0        | 0        |
| SINE          | Alu           | B1_Mus2 | chr12 | 6144701  | 6144847  | - | 0        | 0        | 0        |
| SINE          | Alu           | B1_Mus1 | chr12 | 6169239  | 6169386  | + | 0        | 0        | 0.342623 |
| Simple_repeat | Simple_repeat | (A)n    | chr12 | 6169387  | 6169413  | + | 0        | 0        | 0.342623 |
| LTR           | MaLR          | MTA_Mm  | chr12 | 6508038  | 6508429  | - | 0        | 0        | 0        |
| LTR           | MaLR          | MTA_Mm  | chr12 | 6567743  | 6568124  | - | 0        | 0        | 0        |
| LTR           | MaLR          | MTA_Mm  | chr12 | 6641419  | 6641811  | + | 0        | 0        | 0        |
| LINE          | L1            | L1Md_F2 | chr12 | 6650652  | 6655660  | + | 0        | 0        | 0        |
| LTR           | MaLR          | MTA_Mm  | chr12 | 6804138  | 6804531  | + | 0        | 0        | 0        |
| SINE          | Alu           | B1_Mus2 | chr12 | 7517420  | 7517567  | - | 0        | 0        | 0        |
| Simple_repeat | Simple_repeat | (A)n    | chr12 | 8490422  | 8490457  | + | 0        | 0        | 0        |
| LTR           | MaLR          | MTB     | chr12 | 8529916  | 8530386  | + | 0        | 0        | 0        |
| SINE          | Alu           | B1_Mm   | chr12 | 8625459  | 8625604  | + | 0        | 0        | 0        |
| Simple_repeat | Simple_repeat | (A)n    | chr12 | 8625605  | 8625629  | + | 0        | 0        | 0        |
| LTR           | MaLR          | MTA_Mm  | chr12 | 8635000  | 8635397  | - | 0.332194 | 0.380568 | 0.615324 |
| SINE          | Alu           | B1_Mus1 | chr12 | 8902711  | 8902857  | + | 0        | 0        | 0        |
| Simple_repeat | Simple_repeat | (A)n    | chr12 | 8902858  | 8902887  | + | 0        | 0        | 0        |
| SINE          | Alu           | B1_Mur1 | chr12 | 8951826  | 8951972  | + | 0        | 0        | 0        |
| Simple_repeat | Simple_repeat | (A)n    | chr12 | 8951973  | 8951997  | + | 0        | 0        | 0        |
| LTR           | MaLR          | MTA_Mm  | chr12 | 9088668  | 9089063  | + | 0        | 0        | 0        |
| Simple_repeat | Simple_repeat | (A)n    | chr12 | 10023552 | 10023592 | + | 0        | 0        | 0        |
| LTR           | MaLR          | MTA_Mm  | chr12 | 10267196 | 10267593 | + | 0        | 0        | 0        |
| SINE          | Alu           | B1_Mus2 | chr12 | 10350818 | 10350963 | + | 0        | 0        | 0        |
| SINE          | Alu           | B1_Mus1 | chr12 | 10408818 | 10408965 | - | 0        | 0        | 0        |
| Simple_repeat | Simple_repeat | (A)n    | chr12 | 11528674 | 11528700 | + | 0        | 0        | 0        |
| Simple_repeat | Simple_repeat | (A)n    | chr12 | 12470827 | 12470854 | + | 0        | 0        | 0        |
| LTR           | MaLR          | MTA_Mm  | chr12 | 12673467 | 12673861 | - | 0        | 0        | 0        |
| SINE          | Alu           | B1_Mm   | chr12 | 12720986 | 12721108 | - | 0        | 0        | 0        |
| SINE          | Alu           | B1_Mm   | chr12 | 12831961 | 12832106 | + | 0        | 0        | 0        |
| Simple_repeat | Simple_repeat | (A)n    | chr12 | 12832107 | 12832136 | + | 0        | 0        | 0        |
| SINE          | Alu           | B1_Mm   | chr12 | 12865689 | 12865835 | + | 0        | 0        | 0        |
| Simple_repeat | Simple_repeat | (A)n    | chr12 | 12865836 | 12865860 | + | 0        | 0        | 0        |
| SINE          | Alu           | B1_Mus1 | chr12 | 12910170 | 12910324 | - | 0        | 0        | 0        |
| LTR           | MaLR          | MTA_Mm  | chr12 | 13069297 | 13069691 | + | 0        | 0        | 0        |
| Simple_repeat | Simple_repeat | (A)n    | chr12 | 14153912 | 14153951 | + | 0.332194 | 0.708814 | 0.342623 |
| SINE          | Alu           | B1_Mm   | chr12 | 14591894 | 14592039 | - | 0        | 0        | 0        |
| SINE          | Alu           | B1_Mus2 | chr12 | 15124881 | 15125024 | - | 0        | 0        | 0        |
| LINE          | L1            | L1Md_F2 | chr12 | 15672344 | 15676981 | - | 0        | 0        | 0        |
| SINE          | Alu           | B1_Mus2 | chr12 | 17520134 | 17520279 | + | 0        | 0        | 0        |
| Simple_repeat | Simple_repeat | (A)n    | chr12 | 17520280 | 17520317 | + | 1.05163  | 0        | 0        |
| LTR           | MaLR          | MTA_Mm  | chr10 | 33429352 | 33429747 | - | 0        | 0        | 0        |
| SINE          | Alu           | B1_Mm   | chr12 | 19054679 | 19054824 | + | 0        | 0        | 0        |
| Simple_repeat | Simple_repeat | (A)n    | chr12 | 19054825 | 19054846 | + | 0        | 0        | 0        |
| SINE          | Alu           | B1_Mus2 | chr12 | 20833632 | 20833777 | - | 0        | 0        | 0        |
| SINE          | Alu           | B1_Mus2 | chr12 | 21392697 | 21392841 | + | 0        | 0        | 0        |
| Simple_repeat | Simple_repeat | (A)n    | chr12 | 21392842 | 21392881 | + | 0        | 0        | 0.342623 |
| SINE          | Alu           | B1_Mm   | chr12 | 21523893 | 21524010 | + | 0        | 0        | 0        |
| SINE          | Alu           | B1_Mm   | chr12 | 22319833 | 22319978 | - | 0        | 0        | 0        |
| Simple_repeat | Simple_repeat | (A)n    | chr12 | 23068473 | 23068502 | + | 0        | 0        | 0        |
| SINE          | Alu           | B1_Mus2 | chr12 | 23432127 | 23432275 | - | 0        | 0        | 0        |
| SINE          | Alu           | B1_Mus2 | chr12 | 23644845 | 23644991 | + | 0        | 0        | 0        |

|               |               |         |       |                     |          |   |          |
|---------------|---------------|---------|-------|---------------------|----------|---|----------|
| Simple_repeat | Simple_repeat | (A)n    | chr12 | 23644992 23645031 + | 0        | 0 | 0        |
| SINE          | Alu           | B1_Mm   | chr12 | 23782861 23783006 - | 0        | 0 | 0        |
| SINE          | Alu           | B1_Mus2 | chr12 | 23868499 23868645 - | 0        | 0 | 0        |
| SINE          | Alu           | B1_Mm   | chr12 | 24107656 24107801 - | 0        | 0 | 0.342623 |
| SINE          | Alu           | B1_Mus2 | chr12 | 24597763 24597911 + | 0        | 0 | 0        |
| Simple_repeat | Simple_repeat | (A)n    | chr12 | 24597912 24597934 + | 0        | 0 | 0        |
| SINE          | Alu           | B1_Mus2 | chr12 | 25316877 25317024 - | 0        | 0 | 0        |
| LTR           | MaLR          | MTA_Mm  | chr12 | 25451960 25452354 - | 0        | 0 | 0.615324 |
| LTR           | MaLR          | MTA_Mm  | chr12 | 26484494 26484879 + | 0.591053 | 0 | 0        |
| Simple_repeat | Simple_repeat | (A)n    | chr10 | 34537130 34537163 + | 0        | 0 | 0        |
| Simple_repeat | Simple_repeat | (A)n    | chr10 | 34587040 34587080 + | 0        | 0 | 0        |
| LTR           | MaLR          | MTA_Mm  | chr12 | 27633293 27633686 - | 0        | 0 | 0        |
| SINE          | Alu           | B1_Mm   | chr10 | 34654164 34654310 - | 0        | 0 | 0        |
| LTR           | MaLR          | MTA_Mm  | chr12 | 28309116 28309497 + | 0        | 0 | 0        |
| LTR           | MaLR          | MTA_Mm  | chr10 | 34774847 34775222 - | 0        | 0 | 0        |
| LTR           | MaLR          | MTA_Mm  | chr12 | 28997443 28997839 - | 0        | 0 | 0        |
| Simple_repeat | Simple_repeat | (A)n    | chr12 | 29943129 29943162 + | 0        | 0 | 0        |
| LTR           | MaLR          | MTA_Mm  | chr12 | 30083705 30084100 - | 0        | 0 | 0        |
| LTR           | MaLR          | MTA_Mm  | chr12 | 30085196 30085591 - | 0        | 0 | 0        |
| Simple_repeat | Simple_repeat | (A)n    | chr12 | 31283657 31283743 + | 0        | 0 | 0        |
| LTR           | MaLR          | MTA_Mm  | chr12 | 31380953 31381350 - | 0        | 0 | 0        |
| SINE          | Alu           | B1_Mus2 | chr10 | 35003976 35004122 - | 0        | 0 | 0        |
| SINE          | Alu           | B1_Mus2 | chr12 | 32102993 32103139 + | 0        | 0 | 0.342623 |
| Simple_repeat | Simple_repeat | (A)n    | chr12 | 32103140 32103163 + | 0        | 0 | 0.342623 |
| Simple_repeat | Simple_repeat | (A)n    | chr12 | 33194645 33194703 + | 0.591053 | 0 | 0        |
| LTR           | MaLR          | MTA_Mm  | chr12 | 33497715 33498114 - | 0        | 0 | 0        |
| LTR           | MaLR          | MTA_Mm  | chr10 | 35317848 35318240 - | 0        | 0 | 0        |
| SINE          | Alu           | B1_Mm   | chr12 | 34279377 34279527 - | 0        | 0 | 0        |
| LINE          | L1            | L1Md_F2 | chr10 | 35332766 35339246 - | 0        | 0 | 0        |
| LTR           | MaLR          | MTA_Mm  | chr12 | 34634155 34634547 + | 0        | 0 | 0        |
| LTR           | MaLR          | MTA_Mm  | chr12 | 34706725 34707118 - | 0        | 0 | 0        |
| SINE          | Alu           | B1_Mm   | chr10 | 6082720 6082866 +   | 0        | 0 | 0        |
| Simple_repeat | Simple_repeat | (A)n    | chr10 | 6082867 6082936 +   | 0        | 0 | 0        |
| SINE          | Alu           | B1_Mus1 | chr12 | 35627536 35627683 + | 0        | 0 | 0        |
| Simple_repeat | Simple_repeat | (A)n    | chr10 | 35536181 35536232 + | 0        | 0 | 0        |
| SINE          | Alu           | B1_Mus2 | chr10 | 35555519 35555664 - | 0        | 0 | 0        |
| SINE          | Alu           | B1_Mus2 | chr12 | 37100994 37101137 + | 0        | 0 | 0        |
| Simple_repeat | Simple_repeat | (A)n    | chr12 | 37101138 37101166 + | 0        | 0 | 0.342623 |
| LTR           | MaLR          | MTA_Mm  | chr12 | 37527071 37527465 - | 0        | 0 | 0        |
| SINE          | Alu           | B1_Mus1 | chr12 | 37646652 37646799 - | 0        | 0 | 0        |
| SINE          | Alu           | B1_Mm   | chr12 | 37663351 37663514 + | 0        | 0 | 0        |
| Simple_repeat | Simple_repeat | (A)n    | chr12 | 37663515 37663560 + | 0        | 0 | 0        |
| SINE          | Alu           | B1_Mus2 | chr12 | 37697506 37697652 - | 0        | 0 | 0        |
| Simple_repeat | Simple_repeat | (TTTA)n | chr10 | 35681421 35681471 + | 0        | 0 | 0        |
| Simple_repeat | Simple_repeat | (A)n    | chr10 | 35826981 35827015 + | 0        | 0 | 0        |
| Simple_repeat | Simple_repeat | (A)n    | chr12 | 39483572 39483606 + | 0        | 0 | 0        |
| SINE          | Alu           | B1_Mm   | chr12 | 40026568 40026713 + | 0        | 0 | 0        |
| Simple_repeat | Simple_repeat | (A)n    | chr12 | 40026714 40026738 + | 0        | 0 | 0        |
| LTR           | MaLR          | MTA_Mm  | chr12 | 40059374 40059752 - | 0        | 0 | 0        |
| LTR           | MaLR          | MTA_Mm  | chr12 | 40362042 40362437 - | 0        | 0 | 0        |
| SINE          | Alu           | B1_Mus1 | chr10 | 6107133 6107269 -   | 0        | 0 | 0        |
| LINE          | L1            | L1Md_T  | chr12 | 44825237 44831659 - | 0        | 0 | 0        |
| SINE          | Alu           | B1_Mm   | chr12 | 45321350 45321496 - | 0        | 0 | 0        |
| LTR           | MaLR          | MTA_Mm  | chr12 | 45936339 45936737 + | 0        | 0 | 0        |
| LTR           | MaLR          | MTB     | chr12 | 46203408 46203806 + | 0        | 0 | 0        |
| SINE          | Alu           | B1_Mus2 | chr12 | 46561988 46562134 + | 0        | 0 | 0        |
| Simple_repeat | Simple_repeat | (A)n    | chr12 | 46562135 46562164 + | 0        | 0 | 0        |
| SINE          | Alu           | B1_Mus2 | chr12 | 46743803 46743950 + | 0        | 0 | 0        |
| Simple_repeat | Simple_repeat | (A)n    | chr12 | 46743951 46743979 + | 0        | 0 | 0        |
| SINE          | B2            | B2_Mm1a | chr12 | 48387467 48387656 - | 0.332194 | 0 | 0        |
| Simple_repeat | Simple_repeat | (A)n    | chr12 | 48577748 48577792 + | 0        | 0 | 0        |
| SINE          | Alu           | B1_Mus1 | chr10 | 6126524 6126667 +   | 0        | 0 | 0        |
| Simple_repeat | Simple_repeat | (A)n    | chr10 | 6126668 6126713 +   | 0        | 0 | 0        |
| SINE          | Alu           | B1_Mm   | chr12 | 48975926 48976057 - | 0        | 0 | 0        |
| Simple_repeat | Simple_repeat | (A)n    | chr12 | 49215230 49215267 + | 0        | 0 | 0        |
| SINE          | Alu           | B1_Mus2 | chr12 | 49333765 49333892 - | 0        | 0 | 0        |
| SINE          | Alu           | B1_Mus1 | chr10 | 36804181 36804324 - | 0        | 0 | 0        |

|               |               |         |       |                     |          |          |          |
|---------------|---------------|---------|-------|---------------------|----------|----------|----------|
| LTR           | MaLR          | MTA_Mm  | chr12 | 49591008 49591402 - | 0        | 0        | 0        |
| SINE          | Alu           | B1_Mm   | chr10 | 36816790 36816917 - | 0        | 0        | 0        |
| LINE          | L1            | Lx      | chr12 | 50017821 50022093 + | 0        | 0        | 0        |
| LTR           | MaLR          | MTA_Mm  | chr12 | 50224067 50224435 + | 0        | 0        | 0        |
| LINE          | L1            | L1Md_F2 | chr12 | 50536723 50543087 - | 0        | 0        | 0        |
| SINE          | Alu           | B1_Mus1 | chr12 | 50900820 50900969 - | 0        | 0        | 0        |
| SINE          | Alu           | B1_Mus2 | chr12 | 50920296 50920442 - | 0        | 0        | 0        |
| Simple_repeat | Simple_repeat | (A)n    | chr12 | 51011420 51011463 + | 0        | 0        | 0        |
| LTR           | MaLR          | MTA_Mm  | chr12 | 51176537 51176932 - | 0        | 0        | 0        |
| Simple_repeat | Simple_repeat | (A)n    | chr12 | 52362320 52362385 + | 0        | 0        | 0        |
| LTR           | MaLR          | MTA_Mm  | chr12 | 52621033 52621424 - | 0        | 0        | 0        |
| Simple_repeat | Simple_repeat | (A)n    | chr12 | 53180721 53180756 + | 0        | 0        | 0.342623 |
| SINE          | Alu           | B1_Mus1 | chr12 | 53679436 53679598 + | 0.923247 | 3.34916  | 2.18859  |
| Simple_repeat | Simple_repeat | (A)n    | chr12 | 53719814 53719843 + | 0        | 0        | 0        |
| Simple_repeat | Simple_repeat | (A)n    | chr12 | 53738902 53738950 + | 0        | 0        | 0        |
| LINE          | L1            | L1Md_F2 | chr10 | 37226800 37231846 + | 0        | 0        | 0        |
| Simple_repeat | Simple_repeat | (A)n    | chr12 | 55392544 55392589 + | 0        | 0        | 0        |
| SINE          | Alu           | B1_Mus2 | chr12 | 55406737 55406882 - | 0        | 0        | 0        |
| LTR           | MaLR          | MTA_Mm  | chr12 | 55649987 55650381 - | 0        | 0        | 0        |
| SINE          | Alu           | B1_Mm   | chr12 | 55682251 55682395 - | 0        | 0        | 0.615324 |
| SINE          | Alu           | B1_Mus2 | chr12 | 55801494 55801640 - | 0        | 0        | 0        |
| LTR           | MaLR          | MTA_Mm  | chr10 | 37378634 37379028 - | 0        | 0        | 0        |
| SINE          | Alu           | B1_Mus2 | chr12 | 55900580 55900709 - | 0        | 0.708814 | 0        |
| SINE          | Alu           | B1_Mus2 | chr12 | 55969479 55969625 + | 0        | 0        | 0        |
| Simple_repeat | Simple_repeat | (A)n    | chr12 | 55969626 55969728 + | 0        | 0        | 0        |
| SINE          | Alu           | B1_Mus1 | chr12 | 55988233 55988403 + | 0        | 0        | 0        |
| Simple_repeat | Simple_repeat | (A)n    | chr12 | 55988404 55988436 + | 0        | 0        | 0        |
| SINE          | Alu           | B1_Mm   | chr12 | 56219474 56219620 + | 0.591053 | 0.380568 | 0.342623 |
| Simple_repeat | Simple_repeat | (A)n    | chr12 | 56219621 56219647 + | 0        | 0.380568 | 0.342623 |
| LTR           | ERV1          | RMER21A | chr12 | 56223649 56224525 + | 0        | 0        | 0        |
| LTR           | ERV1          | RMER21A | chr12 | 56373233 56373972 + | 0        | 0        | 0        |
| SINE          | Alu           | B1_Mm   | chr12 | 57338326 57338472 + | 0        | 0        | 0        |
| Simple_repeat | Simple_repeat | (A)n    | chr12 | 57338473 57338499 + | 0        | 0        | 0        |
| LTR           | MaLR          | MTA_Mm  | chr12 | 59393250 59393645 + | 0.591053 | 0        | 0        |
| Simple_repeat | Simple_repeat | (A)n    | chr12 | 60020970 60020998 + | 0        | 0        | 0        |
| SINE          | Alu           | B1_Mur3 | chr12 | 60058234 60058380 + | 0        | 0        | 0        |
| Simple_repeat | Simple_repeat | (A)n    | chr12 | 60058381 60058409 + | 0        | 0        | 0        |
| LINE          | L1            | L1Md_T  | chr10 | 37977914 37984384 - | 0        | 0        | 0        |
| SINE          | B4            | ID_B1   | chr12 | 60755680 60755897 - | 0        | 0        | 0        |
| SINE          | Alu           | B1_Mm   | chr12 | 61790995 61791134 - | 0        | 0        | 0        |
| LTR           | ERVK          | RMER6C  | chr12 | 61917368 61918147 - | 0        | 0        | 0        |
| SINE          | Alu           | B1_Mus1 | chr12 | 63144502 63144647 - | 0        | 0        | 0        |
| Simple_repeat | Simple_repeat | (A)n    | chr12 | 63364314 63364377 + | 0        | 0        | 0        |
| Simple_repeat | Simple_repeat | (A)n    | chr12 | 63585768 63585805 + | 0        | 0        | 0        |
| SINE          | Alu           | B1_Mus2 | chr12 | 64051846 64051991 + | 0        | 0        | 0        |
| Simple_repeat | Simple_repeat | (A)n    | chr12 | 64051992 64052028 + | 0        | 0        | 0        |
| Simple_repeat | Simple_repeat | (A)n    | chr12 | 64118647 64118687 + | 0        | 0        | 0        |
| Simple_repeat | Simple_repeat | (A)n    | chr10 | 38405400 38405427 + | 0        | 0.380568 | 0        |
| SINE          | Alu           | B1_Mus1 | chr12 | 64488745 64488890 - | 0        | 0        | 0        |
| SINE          | Alu           | B1_Mus1 | chr12 | 64924861 64924999 + | 0        | 0        | 0        |
| Simple_repeat | Simple_repeat | (A)n    | chr12 | 64925000 64925023 + | 0        | 0        | 0        |
| Simple_repeat | Simple_repeat | (A)n    | chr12 | 65108165 65108202 + | 0        | 0        | 0        |
| LTR           | MaLR          | MTA_Mm  | chr12 | 65166688 65167082 + | 0        | 0        | 0        |
| SINE          | Alu           | B1_Mus2 | chr12 | 65712491 65712640 + | 0        | 0        | 0        |
| Simple_repeat | Simple_repeat | (A)n    | chr12 | 65712641 65712669 + | 0        | 0        | 0        |
| SINE          | Alu           | B1_Mus2 | chr12 | 66353088 66353224 - | 0        | 0        | 0        |
| LTR           | MaLR          | MTA_Mm  | chr12 | 66607137 66607532 + | 0        | 0        | 0        |
| SINE          | Alu           | B1_Mm   | chr12 | 67175772 67175918 - | 0        | 0        | 0        |
| Simple_repeat | Simple_repeat | (TTTA)n | chr12 | 67184073 67184112 + | 0        | 0        | 0        |
| SINE          | Alu           | B1_Mus1 | chr12 | 67285574 67285711 - | 0        | 0        | 0        |
| Simple_repeat | Simple_repeat | (A)n    | chr12 | 67458147 67458183 + | 0        | 0        | 0        |
| SINE          | Alu           | B1_Mm   | chr12 | 67545878 67545979 - | 0        | 0        | 0        |
| Simple_repeat | Simple_repeat | (A)n    | chr12 | 68433604 68433646 + | 0        | 0        | 0.342623 |
| Simple_repeat | Simple_repeat | (A)n    | chr12 | 68499219 68499253 + | 0        | 0        | 0        |
| Simple_repeat | Simple_repeat | (A)n    | chr12 | 68612327 68612374 + | 81.3778  | 38.4938  | 50.0266  |
| SINE          | Alu           | B1_Mm   | chr12 | 68756631 68756774 - | 0.827951 | 0        | 0        |
| SINE          | Alu           | B1_Mm   | chr12 | 68868852 68868993 - | 0        | 0        | 0        |

|                |                |         |       |                     |          |          |          |
|----------------|----------------|---------|-------|---------------------|----------|----------|----------|
| SINE           | Alu            | B1_Mm   | chr12 | 69267045 69267191 + | 0        | 0        | 0        |
| Low_complexity | Low_complexity | A-rich  | chr12 | 69267192 69267270 + | 0        | 0        | 0        |
| SINE           | Alu            | B1_Mm   | chr12 | 69362713 69362858 - | 0        | 0        | 0        |
| Simple_repeat  | Simple_repeat  | (A)n    | chr12 | 69560081 69560130 + | 0        | 0        | 0        |
| SINE           | Alu            | B1_Mus2 | chr12 | 69687776 69687922 + | 0        | 0        | 0        |
| Simple_repeat  | Simple_repeat  | (A)n    | chr12 | 69687923 69687945 + | 0        | 0        | 0        |
| Simple_repeat  | Simple_repeat  | (A)n    | chr12 | 69706019 69706058 + | 0        | 0        | 0        |
| SINE           | B2             | B2_Mm2  | chr12 | 70050666 70050838 + | 0        | 0        | 0        |
| SINE           | Alu            | B1_Mus2 | chr12 | 70145998 70146128 - | 0        | 0        | 0        |
| SINE           | Alu            | B1_Mus1 | chr12 | 70339733 70339879 + | 0.591053 | 0        | 0        |
| SINE           | Alu            | B1_Mus2 | chr12 | 70564578 70564714 - | 0        | 0        | 0        |
| SINE           | Alu            | PB1D7   | chr12 | 70671932 70672056 + | 0        | 0        | 0        |
| Simple_repeat  | Simple_repeat  | (A)n    | chr12 | 70672057 70672077 + | 0        | 0        | 0        |
| Simple_repeat  | Simple_repeat  | (A)n    | chr12 | 71888551 71888588 + | 0        | 0        | 0        |
| Simple_repeat  | Simple_repeat  | (A)n    | chr12 | 71901009 71901037 + | 0        | 0        | 0        |
| SINE           | Alu            | B1_Mus2 | chr12 | 72075174 72075320 - | 0        | 0        | 0.957947 |
| Simple_repeat  | Simple_repeat  | (A)n    | chr12 | 72398712 72398739 + | 0        | 0        | 0        |
| SINE           | Alu            | B1_Mus2 | chr12 | 73709365 73709509 + | 0        | 0        | 0        |
| Simple_repeat  | Simple_repeat  | (A)n    | chr12 | 73709510 73709539 + | 0        | 0        | 0        |
| Simple_repeat  | Simple_repeat  | (A)n    | chr12 | 73722735 73722762 + | 0        | 0        | 0        |
| Simple_repeat  | Simple_repeat  | (A)n    | chr12 | 73730032 73730072 + | 0        | 0        | 0        |
| SINE           | Alu            | B1_Mus2 | chr12 | 73749656 73749802 + | 0        | 0        | 0        |
| Simple_repeat  | Simple_repeat  | (A)n    | chr12 | 73749803 73749842 + | 0        | 0        | 0        |
| LTR            | MaLR           | MTB     | chr12 | 73778348 73778758 + | 0        | 0        | 0        |
| SINE           | Alu            | B1_Mus2 | chr12 | 73976684 73976830 + | 0        | 0        | 0        |
| Simple_repeat  | Simple_repeat  | (A)n    | chr12 | 73976831 73976865 + | 0        | 0        | 0        |
| Simple_repeat  | Simple_repeat  | (A)n    | chr12 | 74039857 74039905 + | 0        | 0        | 0        |
| SINE           | Alu            | B1_Mur4 | chr12 | 74189359 74189496 - | 0        | 0        | 0        |
| Simple_repeat  | Simple_repeat  | (A)n    | chr12 | 74638590 74638614 + | 0        | 0        | 0        |
| SINE           | Alu            | B1_Mm   | chr12 | 75060381 75060526 + | 0        | 0        | 0        |
| Simple_repeat  | Simple_repeat  | (A)n    | chr12 | 75060527 75060553 + | 0        | 0        | 0        |
| Simple_repeat  | Simple_repeat  | (A)n    | chr12 | 75681540 75681590 + | 0.332194 | 0        | 0        |
| LTR            | MaLR           | MTA_Mm  | chr12 | 76309258 76309653 + | 0        | 0        | 0        |
| scRNA          | scRNA          | BC1_Mm  | chr12 | 76796967 76797095 + | 0        | 0        | 0        |
| SINE           | Alu            | B1_Mus2 | chr12 | 77439098 77439245 + | 0        | 0        | 0        |
| Simple_repeat  | Simple_repeat  | (A)n    | chr12 | 77439246 77439277 + | 0        | 0        | 0        |
| SINE           | Alu            | B1_Mus2 | chr12 | 77444918 77445064 - | 0        | 0        | 0.615324 |
| SINE           | Alu            | B1_Mm   | chr12 | 78074473 78074618 + | 0        | 0        | 0        |
| Simple_repeat  | Simple_repeat  | (A)n    | chr12 | 78074619 78074644 + | 0        | 0        | 0        |
| LTR            | MaLR           | ORR1B2  | chr12 | 78187941 78188222 - | 0        | 0        | 0        |
| SINE           | Alu            | B1_Mus1 | chr12 | 78188241 78188386 - | 0        | 0        | 0        |
| LTR            | MaLR           | MTA_Mm  | chr12 | 78247223 78247614 - | 0        | 0        | 0        |
| Simple_repeat  | Simple_repeat  | (A)n    | chr12 | 78890202 78890266 + | 0.332194 | 0        | 0        |
| SINE           | Alu            | B1_Mus1 | chr10 | 39903332 39903478 + | 0        | 0        | 0        |
| Simple_repeat  | Simple_repeat  | (A)n    | chr10 | 39903479 39903502 + | 0        | 0        | 0        |
| SINE           | Alu            | B1_Mus2 | chr12 | 79268579 79268725 - | 0        | 0        | 0        |
| SINE           | Alu            | B1_Mus2 | chr12 | 80984639 80984748 + | 0        | 0        | 0        |
| Simple_repeat  | Simple_repeat  | (A)n    | chr12 | 80984749 80984774 + | 0        | 0        | 0        |
| Simple_repeat  | Simple_repeat  | (A)n    | chr12 | 81032358 81032382 + | 0        | 0        | 0        |
| SINE           | B2             | B2_Mm2  | chr12 | 81544171 81544357 - | 0        | 0        | 0        |
| LTR            | MaLR           | MTA_Mm  | chr12 | 81730585 81730963 - | 0        | 0        | 0        |
| SINE           | Alu            | B1_Mus2 | chr12 | 81829544 81829689 - | 0        | 0        | 0        |
| SINE           | Alu            | B1_Mus1 | chr12 | 81987851 81987994 - | 0        | 0        | 0        |
| SINE           | Alu            | B1_Mus1 | chr12 | 82658880 82659027 - | 0        | 0        | 0        |
| SINE           | Alu            | B1_Mm   | chr12 | 82806992 82807120 + | 0        | 0        | 0        |
| Simple_repeat  | Simple_repeat  | (A)n    | chr10 | 40264457 40264539 + | 0        | 0        | 0        |
| SINE           | Alu            | B1_Mm   | chr12 | 84838543 84838692 - | 0        | 0        | 0        |
| SINE           | Alu            | B1_Mus2 | chr12 | 85289350 85289496 - | 0        | 0        | 0        |
| LTR            | MaLR           | MTA_Mm  | chr12 | 85390451 85390846 - | 0        | 0        | 0.342623 |
| SINE           | Alu            | B1_Mus2 | chr12 | 85572555 85572693 - | 0        | 0        | 0        |
| SINE           | B2             | B2_Mm2  | chr12 | 85992682 85992855 - | 0        | 0        | 0        |
| SINE           | Alu            | B1_Mm   | chr12 | 86336312 86336457 - | 0        | 0        | 0.615324 |
| Simple_repeat  | Simple_repeat  | (A)n    | chr12 | 86621868 86621903 + | 0.591053 | 0.708814 | 0        |
| SINE           | Alu            | B1_Mus1 | chr12 | 86718253 86718407 - | 0        | 0        | 0.342623 |
| SINE           | Alu            | B1_Mus2 | chr12 | 87063532 87063678 - | 0        | 0        | 0        |
| SINE           | Alu            | B1_Mus2 | chr12 | 87077606 87077751 - | 0        | 0        | 0.342623 |
| Simple_repeat  | Simple_repeat  | (A)n    | chr12 | 87918789 87918830 + | 0        | 0        | 0        |



|                |                |         |       |                     |          |   |          |
|----------------|----------------|---------|-------|---------------------|----------|---|----------|
| SINE           | Alu            | B1_Mus1 | chr12 | 88011031 88011178 - | 0        | 0 | 0        |
| SINE           | Alu            | B1_Mus2 | chr12 | 88123916 88124056 + | 0        | 0 | 0        |
| Simple_repeat  | Simple_repeat  | (A)n    | chr12 | 88124057 88124085 + | 0        | 0 | 0        |
| SINE           | Alu            | B1_Mus1 | chr12 | 88187774 88187901 + | 0        | 0 | 0.342623 |
| Simple_repeat  | Simple_repeat  | (A)n    | chr12 | 88187902 88187946 + | 0        | 0 | 0        |
| SINE           | Alu            | B1_Mm   | chr12 | 88307650 88307796 + | 0.591053 | 0 | 0        |
| Simple_repeat  | Simple_repeat  | (A)n    | chr12 | 88307797 88307822 + | 0        | 0 | 0        |
| SINE           | Alu            | B1F1    | chr12 | 88625419 88625556 - | 0        | 0 | 0        |
| SINE           | Alu            | B1_Mur4 | chr12 | 88738426 88738571 - | 0        | 0 | 0        |
| Simple_repeat  | Simple_repeat  | (A)n    | chr12 | 88761967 88761996 + | 0        | 0 | 0        |
| SINE           | Alu            | B1_Mus1 | chr12 | 91753335 91753482 - | 0        | 0 | 0        |
| SINE           | Alu            | B1_Mm   | chr10 | 41186346 41186491 - | 0        | 0 | 0        |
| Simple_repeat  | Simple_repeat  | (A)n    | chr12 | 93116168 93116208 + | 0        | 0 | 0        |
| SINE           | Alu            | B1_Mus2 | chr12 | 93509024 93509171 - | 0        | 0 | 0        |
| SINE           | Alu            | B1_Mm   | chr12 | 93545359 93545505 - | 0        | 0 | 0        |
| Low_complexity | Low_complexity | A-rich  | chr12 | 94504054 94504143 + | 0        | 0 | 0        |
| SINE           | Alu            | B1_Mus2 | chr12 | 94656113 94656259 + | 0        | 0 | 0        |
| Simple_repeat  | Simple_repeat  | (A)n    | chr12 | 95045784 95045821 + | 0        | 0 | 0        |
| Simple_repeat  | Simple_repeat  | (A)n    | chr12 | 95238418 95238454 + | 0        | 0 | 0        |
| SINE           | Alu            | B1_Mus1 | chr12 | 95416229 95416374 - | 0        | 0 | 0        |
| Simple_repeat  | Simple_repeat  | (A)n    | chr12 | 95466711 95466860 + | 0        | 0 | 0        |
| Simple_repeat  | Simple_repeat  | (A)n    | chr12 | 95482469 95482520 + | 0        | 0 | 0        |
| LTR            | MaLR           | MTA_Mm  | chr12 | 95486837 95487231 - | 0        | 0 | 0        |
| SINE           | Alu            | B1_Mm   | chr12 | 95803657 95803803 - | 0        | 0 | 0        |
| LINE           | L1             | L1Md_T  | chr12 | 95855838 95861110 - | 0        | 0 | 0        |
| SINE           | Alu            | B1_Mus2 | chr12 | 96312581 96312729 - | 0        | 0 | 0        |
| Simple_repeat  | Simple_repeat  | (A)n    | chr12 | 96572291 96572404 + | 0        | 0 | 0        |
| Simple_repeat  | Simple_repeat  | (A)n    | chr12 | 96705033 96705078 + | 0        | 0 | 0        |
| Simple_repeat  | Simple_repeat  | (A)n    | chr12 | 96921996 96922037 + | 0        | 0 | 0        |
| SINE           | Alu            | B1_Mm   | chr12 | 97775062 97775198 - | 0        | 0 | 0        |
| SINE           | Alu            | B1_Mm   | chr12 | 97999753 97999899 + | 0        | 0 | 0        |
| Simple_repeat  | Simple_repeat  | (A)n    | chr12 | 97999900 97999951 + | 0        | 0 | 0        |
| SINE           | Alu            | B1_Mus2 | chr10 | 41800083 41800233 + | 0        | 0 | 0        |
| Simple_repeat  | Simple_repeat  | (A)n    | chr10 | 41800234 41800258 + | 0        | 0 | 0        |
| SINE           | B2             | B3      | chr12 | 10041043 10041064 + | 0        | 0 | 0        |
| Simple_repeat  | Simple_repeat  | (A)n    | chr12 | 10041064 10041066 + | 0        | 0 | 0        |
| LTR            | MaLR           | MTA_Mm  | chr12 | 10088902 10088941 + | 0        | 0 | 0        |
| SINE           | B2             | B2_Mm2  | chr12 | 10131287 10131306 + | 0        | 0 | 0.342623 |
| SINE           | Alu            | B1_Mm   | chr10 | 42004353 42004499 + | 0        | 0 | 0        |
| SINE           | Alu            | B1_Mm   | chr12 | 10236374 10236389 + | 0        | 0 | 0        |
| SINE           | Alu            | PB1D10  | chr12 | 10255283 10255295 - | 0        | 0 | 0        |
| SINE           | Alu            | B1_Mus1 | chr12 | 10369535 10369550 - | 0        | 0 | 0        |
| SINE           | Alu            | B1_Mus2 | chr12 | 10373900 10373914 - | 0        | 0 | 0        |
| SINE           | Alu            | B1_Mus2 | chr12 | 10395966 10395980 + | 0        | 0 | 0        |
| Simple_repeat  | Simple_repeat  | (A)n    | chr12 | 10395980 10395983 + | 0        | 0 | 0        |
| LTR            | MaLR           | MTA_Mm  | chr12 | 10473400 10473439 + | 0        | 0 | 0        |
| LTR            | MaLR           | MTB_Mm  | chr12 | 10526007 10526047 - | 0        | 0 | 0        |
| LTR            | MaLR           | MTA_Mm  | chr12 | 10557599 10557639 - | 0        | 0 | 0        |
| LTR            | MaLR           | MTA_Mm  | chr10 | 6708535 6708928 +   | 0        | 0 | 0.342623 |
| Low_complexity | Low_complexity | A-rich  | chr10 | 42273881 42273978 + | 0        | 0 | 0        |
| Simple_repeat  | Simple_repeat  | (A)n    | chr12 | 10663251 10663254 + | 0        | 0 | 0        |
| Simple_repeat  | Simple_repeat  | (A)n    | chr12 | 10776668 10776672 + | 0        | 0 | 0        |
| LTR            | MaLR           | MTA_Mm  | chr12 | 10854833 10854872 + | 0        | 0 | 0        |
| SINE           | Alu            | B1_Mus1 | chr10 | 42469695 42469842 - | 0        | 0 | 0        |
| SINE           | Alu            | B1_Mus1 | chr12 | 10996834 10996849 - | 0        | 0 | 0        |
| SINE           | Alu            | B1_Mus2 | chr10 | 42573059 42573205 - | 0        | 0 | 0        |
| SINE           | Alu            | B1_Mus2 | chr12 | 11036162 11036177 + | 0        | 0 | 0        |
| Simple_repeat  | Simple_repeat  | (A)n    | chr12 | 11036177 11036180 + | 0        | 0 | 0        |
| SINE           | Alu            | B1_Mus1 | chr12 | 11070832 11070847 + | 0        | 0 | 0        |
| SINE           | Alu            | B1_Mm   | chr12 | 11123549 11123564 + | 0        | 0 | 0        |
| Simple_repeat  | Simple_repeat  | (A)n    | chr10 | 42695503 42695544 + | 0        | 0 | 0        |
| Simple_repeat  | Simple_repeat  | (A)n    | chr12 | 11236798 11236803 + | 0        | 0 | 0        |
| Simple_repeat  | Simple_repeat  | (A)n    | chr12 | 11272222 11272226 + | 0        | 0 | 0        |
| SINE           | Alu            | B1_Mm   | chr12 | 11275066 11275080 - | 0        | 0 | 0        |
| SINE           | Alu            | B1_Mus2 | chr12 | 11289974 11289989 - | 0        | 0 | 0        |
| SINE           | Alu            | B1_Mus1 | chr12 | 11293723 11293737 + | 0        | 0 | 0        |
| Simple_repeat  | Simple_repeat  | (A)n    | chr12 | 11293738 11293740 + | 0        | 0 | 0        |

|                |                |            |       |                     |          |          |          |
|----------------|----------------|------------|-------|---------------------|----------|----------|----------|
| Simple_repeat  | Simple_repeat  | (A)n       | chr10 | 42932702 42932736 + | 0        | 0        | 0.615324 |
| Simple_repeat  | Simple_repeat  | (A)n       | chr10 | 42934984 42935027 + | 0.591053 | 0        | 0        |
| Simple_repeat  | Simple_repeat  | (A)n       | chr12 | 11514587 11514592 + | 0        | 0        | 0        |
| Simple_repeat  | Simple_repeat  | (A)n       | chr12 | 11516137 11516139 + | 0        | 0        | 0        |
| Simple_repeat  | Simple_repeat  | (A)n       | chr12 | 11980921 11980924 + | 0        | 0        | 0        |
| Simple_repeat  | Simple_repeat  | (A)n       | chr12 | 11985890 11985894 + | 0        | 0        | 0        |
| SINE           | Alu            | B1_Mm      | chr10 | 43307937 43308085 + | 0        | 0        | 0        |
| SINE           | Alu            | B1_Mm      | chr12 | 12031891 12031905 - | 0        | 0        | 0        |
| Simple_repeat  | Simple_repeat  | (A)n       | chr12 | 12050274 12050279 + | 0        | 0.380568 | 0        |
| scRNA          | scRNA          | 4.5SRNA    | chr12 | 12056363 12056372 - | 0        | 0        | 0        |
| LTR            | MaLR           | MTA_Mm     | chr10 | 6875805 6876192 +   | 0        | 0        | 0        |
| SINE           | Alu            | B1_Mus2    | chr13 | 3074972 3075118 +   | 0        | 0        | 0        |
| Simple_repeat  | Simple_repeat  | (A)n       | chr13 | 3075119 3075142 +   | 0        | 0        | 0        |
| SINE           | Alu            | B1_Mm      | chr13 | 3256411 3256547 -   | 0        | 0        | 0        |
| SINE           | Alu            | B1_Mus2    | chr13 | 3393746 3393892 +   | 0        | 0        | 0        |
| LTR            | MaLR           | MTA_Mm     | chr10 | 43421735 43422129 - | 0        | 0        | 0        |
| SINE           | Alu            | B1_Mus2    | chr13 | 3629431 3629572 -   | 0        | 0        | 0        |
| SINE           | Alu            | B1_Mus2    | chr13 | 3631498 3631640 +   | 0        | 0        | 0        |
| Simple_repeat  | Simple_repeat  | (A)n       | chr13 | 3631641 3631685 +   | 0        | 0        | 0        |
| SINE           | Alu            | B1_Mus2    | chr13 | 3872925 3873070 -   | 0        | 0        | 0        |
| SINE           | Alu            | B1_Mm      | chr13 | 4171004 4171150 -   | 0        | 0        | 0        |
| SINE           | Alu            | B1_Mus2    | chr13 | 4225773 4225919 +   | 0        | 0        | 0        |
| Simple_repeat  | Simple_repeat  | (A)n       | chr13 | 4225920 4225946 +   | 0        | 0        | 0        |
| LTR            | MaLR           | MTA_Mm     | chr13 | 4962817 4963210 -   | 0        | 0        | 0        |
| Simple_repeat  | Simple_repeat  | (A)n       | chr10 | 43547026 43547085 + | 0        | 0        | 0        |
| LINE           | L1             | L1Md_T     | chr13 | 5091424 5098088 -   | 0        | 0        | 0        |
| Simple_repeat  | Simple_repeat  | (A)n       | chr10 | 43571875 43571910 + | 0        | 0        | 0        |
| SINE           | Alu            | B1_Mus2    | chr13 | 5471973 5472086 -   | 0        | 0        | 0        |
| LTR            | MaLR           | MTA_Mm     | chr10 | 43572860 43573255 + | 0        | 0        | 0        |
| SINE           | Alu            | B1_Mus2    | chr13 | 5724000 5724145 -   | 0        | 0        | 0        |
| SINE           | Alu            | B1_Mus1    | chr13 | 6168741 6168882 +   | 0        | 0        | 0        |
| Simple_repeat  | Simple_repeat  | (A)n       | chr13 | 6168883 6168925 +   | 0        | 0        | 0        |
| Simple_repeat  | Simple_repeat  | (A)n       | chr13 | 6210177 6210219 +   | 0        | 0        | 0        |
| LTR            | MaLR           | MTA_Mm     | chr13 | 6536099 6536492 +   | 0        | 0        | 0        |
| Simple_repeat  | Simple_repeat  | (A)n       | chr13 | 6763760 6763796 +   | 0        | 0        | 0        |
| SINE           | Alu            | B1_Mus2    | chr13 | 7142048 7142193 +   | 0        | 0        | 0        |
| Simple_repeat  | Simple_repeat  | (A)n       | chr13 | 7142194 7142220 +   | 0.591053 | 0        | 0        |
| Simple_repeat  | Simple_repeat  | (A)n       | chr13 | 7338389 7338425 +   | 0        | 0        | 0        |
| Simple_repeat  | Simple_repeat  | (A)n       | chr13 | 7338573 7338597 +   | 0        | 0        | 0        |
| SINE           | Alu            | B1_Mm      | chr13 | 7349497 7349642 +   | 0        | 0        | 0        |
| Low_complexity | Low_complexity | GA-rich    | chr13 | 7349643 7349780 +   | 0        | 0        | 0        |
| SINE           | Alu            | B1_Mm      | chr13 | 7581745 7581889 +   | 0        | 0        | 0        |
| Simple_repeat  | Simple_repeat  | (A)n       | chr13 | 7581890 7581913 +   | 0        | 0        | 0        |
| Simple_repeat  | Simple_repeat  | (A)n       | chr13 | 7852506 7852537 +   | 0        | 0        | 0        |
| LTR            | MaLR           | MTA_Mm-int | chr13 | 7908604 7909614 -   | 0        | 0        | 0        |
| LTR            | MaLR           | MTA_Mm     | chr13 | 8066391 8066774 -   | 0        | 0        | 0        |
| Simple_repeat  | Simple_repeat  | (A)n       | chr13 | 8116770 8116796 +   | 0        | 0        | 0        |
| SINE           | Alu            | B1_Mm      | chr10 | 43766869 43767014 - | 0        | 0        | 0        |
| Simple_repeat  | Simple_repeat  | (A)n       | chr13 | 8776222 8776256 +   | 0        | 0        | 0        |
| LTR            | MaLR           | MTA_Mm     | chr13 | 8789329 8789723 +   | 0        | 0        | 0        |
| SINE           | Alu            | B1_Mm      | chr13 | 8925622 8925767 +   | 0        | 0        | 0        |
| SINE           | Alu            | B1_Mus2    | chr13 | 8996981 8997126 +   | 0        | 0        | 0        |
| Simple_repeat  | Simple_repeat  | (A)n       | chr13 | 8997127 8997159 +   | 0        | 0        | 0        |
| LTR            | MaLR           | MTB        | chr13 | 9065833 9066225 -   | 0        | 0        | 0.615324 |
| SINE           | Alu            | B1_Mm      | chr13 | 9807401 9807541 +   | 0        | 0        | 0        |
| Simple_repeat  | Simple_repeat  | (A)n       | chr13 | 9807542 9807571 +   | 0        | 0        | 0        |
| LINE           | L1             | L1Md_T     | chr13 | 9831267 9837911 -   | 0        | 0        | 0        |
| SINE           | Alu            | B1_Mm      | chr13 | 11241806 11241952 + | 0        | 0        | 0        |
| Simple_repeat  | Simple_repeat  | (A)n       | chr13 | 11241953 11241984 + | 0        | 0        | 0        |
| SINE           | Alu            | B1_Mm      | chr13 | 12782709 12782855 + | 0        | 0        | 0        |
| Simple_repeat  | Simple_repeat  | (A)n       | chr13 | 12782856 12782878 + | 0        | 0        | 0        |
| SINE           | Alu            | B1_Mus2    | chr10 | 44207316 44207481 - | 0        | 0        | 0        |
| LINE           | L1             | Lx         | chr13 | 13145962 13152191 + | 0        | 0        | 0.615324 |
| SINE           | Alu            | B1_Mus1    | chr13 | 13284392 13284535 + | 0        | 0        | 0        |
| Low_complexity | Low_complexity | A-rich     | chr13 | 13284536 13284614 + | 0        | 0        | 0        |
| SINE           | Alu            | B1_Mus2    | chr13 | 13448003 13448154 + | 0        | 0        | 0        |
| Simple_repeat  | Simple_repeat  | (A)n       | chr13 | 13448155 13448183 + | 0        | 0        | 0        |

|               |               |         |       |                      |          |   |          |
|---------------|---------------|---------|-------|----------------------|----------|---|----------|
| SINE          | Alu           | B1_Mus2 | chr13 | 13517876 13518022 +  | 0        | 0 | 0        |
| Simple_repeat | Simple_repeat | (A)n    | chr13 | 13518023 13518047 +  | 0        | 0 | 0        |
| LTR           | MaLR          | MTA_Mm  | chr13 | 13654197 13654590 -  | 0        | 0 | 0        |
| SINE          | Alu           | B1_Mus1 | chr13 | 14133886 14134033 -  | 0        | 0 | 0.615324 |
| SINE          | Alu           | B1_Mm   | chr13 | 14139606 14139752 +  | 0        | 0 | 0        |
| Simple_repeat | Simple_repeat | (A)n    | chr13 | 14139753 14139783 +  | 0        | 0 | 0.342623 |
| Other         | Other         | RMER1B  | chr13 | 15249376 15250045 -  | 0        | 0 | 0        |
| Simple_repeat | Simple_repeat | (A)n    | chr13 | 16072236 16072273 +  | 0        | 0 | 0        |
| Simple_repeat | Simple_repeat | (A)n    | chr13 | 16095834 16095870 +  | 0        | 0 | 0        |
| LINE          | L1            | L1Md_T  | chr13 | 16477070 16483894 -  | 0.827951 | 0 | 0        |
| LTR           | ERV1          | RLTR23  | chr13 | 16579226 16579713 +  | 0        | 0 | 0        |
| Simple_repeat | Simple_repeat | (A)n    | chr13 | 16872498 16872527 +  | 0        | 0 | 0        |
| LTR           | MaLR          | MTA_Mm  | chr13 | 17907577 17907973 -  | 0        | 0 | 0        |
| SINE          | Alu           | B1_Mus2 | chr13 | 18193336 18193482 -  | 0.591053 | 0 | 0        |
| SINE          | Alu           | PB1D10  | chr13 | 18483657 18483755 -  | 0        | 0 | 0        |
| Simple_repeat | Simple_repeat | (A)n    | chr13 | 18590276 18590324 +  | 0        | 0 | 0        |
| LTR           | MaLR          | MTA_Mm  | chr13 | 18611277 18611671 -  | 0        | 0 | 0        |
| SINE          | Alu           | B1_Mus2 | chr10 | 44771632 44771778 +  | 0        | 0 | 0        |
| Simple_repeat | Simple_repeat | (A)n    | chr10 | 44771779 44771817 +  | 0        | 0 | 0        |
| Simple_repeat | Simple_repeat | (A)n    | chr13 | 18707432 18707468 +  | 0        | 0 | 0        |
| SINE          | Alu           | B1_Mus1 | chr13 | 19961324 19961469 +  | 0        | 0 | 0        |
| Simple_repeat | Simple_repeat | (A)n    | chr13 | 20044640 20044704 +  | 0        | 0 | 0        |
| SINE          | Alu           | B1_Mus1 | chr10 | 44948957 44949101 -  | 0        | 0 | 0        |
| Simple_repeat | Simple_repeat | (A)n    | chr13 | 22084589 22084618 +  | 0        | 0 | 0        |
| SINE          | Alu           | B1_Mm   | chr13 | 22124297 22124443 -  | 0        | 0 | 0        |
| LTR           | MaLR          | MTA_Mm  | chr13 | 23274139 23274534 +  | 0        | 0 | 0        |
| Simple_repeat | Simple_repeat | (A)n    | chr13 | 23500658 23500694 +  | 0        | 0 | 0        |
| Simple_repeat | Simple_repeat | (A)n    | chr13 | 23822094 23822148 +  | 0        | 0 | 0        |
| SINE          | Alu           | B1_Mm   | chr13 | 25642029 25642186 -  | 0        | 0 | 0        |
| LTR           | MaLR          | MTA_Mm  | chr13 | 25951168 25951561 -  | 0        | 0 | 0        |
| LINE          | L1            | L1Md_T  | chr13 | 26331199 263337871 - | 0        | 0 | 0        |
| LTR           | MaLR          | MTA_Mm  | chr10 | 45467741 45468131 +  | 0        | 0 | 0        |
| SINE          | Alu           | B1_Mus2 | chr13 | 26859637 26859783 +  | 0        | 0 | 0        |
| Simple_repeat | Simple_repeat | (A)n    | chr13 | 26859784 26859824 +  | 0        | 0 | 0        |
| LTR           | MaLR          | MTA_Mm  | chr13 | 27349371 27349764 -  | 0        | 0 | 0        |
| LINE          | L1            | Lx      | chr13 | 27839811 27845872 +  | 0        | 0 | 0        |
| SINE          | Alu           | B1_Mus1 | chr13 | 27994561 27994707 -  | 0        | 0 | 0        |
| LINE          | L1            | L1VL1   | chr13 | 28194016 28199205 +  | 0        | 0 | 0        |
| SINE          | B2            | B2_Mm2  | chr13 | 28504805 28504986 +  | 0        | 0 | 0        |
| Simple_repeat | Simple_repeat | (A)n    | chr13 | 28504987 28505021 +  | 0        | 0 | 0        |
| LTR           | MaLR          | MTA_Mm  | chr10 | 45615831 45616225 +  | 0        | 0 | 0        |
| SINE          | B2            | B2_Mm2  | chr10 | 45666579 45666765 +  | 0        | 0 | 0        |
| Other         | Other         | RMER1B  | chr10 | 45666766 45668066 +  | 0        | 0 | 0        |
| SINE          | Alu           | B1_Mm   | chr13 | 29033515 29033661 +  | 0        | 0 | 0        |
| Simple_repeat | Simple_repeat | (A)n    | chr13 | 29033662 29033695 +  | 0        | 0 | 0        |
| Simple_repeat | Simple_repeat | (A)n    | chr13 | 29172487 29172534 +  | 0        | 0 | 0        |
| SINE          | Alu           | B1_Mus2 | chr13 | 29955738 29955889 -  | 0        | 0 | 0        |
| Simple_repeat | Simple_repeat | (A)n    | chr13 | 30187207 30187236 +  | 0        | 0 | 0        |
| Simple_repeat | Simple_repeat | (A)n    | chr13 | 31481522 31481557 +  | 0        | 0 | 0        |
| Simple_repeat | Simple_repeat | (A)n    | chr13 | 31596039 31596074 +  | 0        | 0 | 0        |
| SINE          | Alu           | B1_Mus1 | chr13 | 31599178 31599324 +  | 0        | 0 | 0        |
| Simple_repeat | Simple_repeat | (A)n    | chr13 | 31599325 31599392 +  | 0        | 0 | 0        |
| SINE          | Alu           | B1_Mm   | chr13 | 33362437 33362580 +  | 0        | 0 | 0        |
| SINE          | Alu           | B1_Mm   | chr13 | 33437000 33437143 +  | 0        | 0 | 0        |
| SINE          | Alu           | B1_Mm   | chr13 | 33506913 33507056 +  | 0        | 0 | 0        |
| SINE          | Alu           | B1_Mus2 | chr13 | 33722760 33722911 -  | 0        | 0 | 0        |
| LTR           | MaLR          | MTA_Mm  | chr13 | 33919288 33919683 -  | 0        | 0 | 0        |
| SINE          | Alu           | B1_Mus2 | chr13 | 34447082 34447209 +  | 0        | 0 | 0        |
| Simple_repeat | Simple_repeat | (A)n    | chr13 | 34447210 34447263 +  | 0        | 0 | 0        |
| SINE          | Alu           | B1_Mm   | chr10 | 7170108 7170254 +    | 0        | 0 | 0        |
| Simple_repeat | Simple_repeat | (A)n    | chr10 | 7170255 7170288 +    | 0        | 0 | 0        |
| LTR           | MaLR          | MTA_Mm  | chr13 | 35492480 35492876 -  | 0        | 0 | 0        |
| LINE          | L1            | L1_Mus1 | chr13 | 35681586 35687320 +  | 0        | 0 | 0        |
| Simple_repeat | Simple_repeat | (A)n    | chr13 | 35738854 35738890 +  | 0        | 0 | 0        |
| Simple_repeat | Simple_repeat | (A)n    | chr13 | 36720144 36720172 +  | 0        | 0 | 0        |
| Simple_repeat | Simple_repeat | (A)n    | chr13 | 37214783 37214809 +  | 0        | 0 | 0        |
| Simple_repeat | Simple_repeat | (A)n    | chr13 | 37401895 37401937 +  | 0        | 0 | 0        |

|                |                |         |       |                     |          |          |          |
|----------------|----------------|---------|-------|---------------------|----------|----------|----------|
| Simple_repeat  | Simple_repeat  | (A)n    | chr10 | 46582278 46582345 + | 0        | 0        | 0        |
| SINE           | Alu            | B1_Mur3 | chr13 | 37540223 37540346 + | 0        | 0        | 0        |
| SINE           | Alu            | B1_Mm   | chr13 | 37828491 37828628 + | 0        | 0        | 0        |
| SINE           | B2             | B2_Mm1t | chr13 | 37828645 37828805 + | 0        | 0        | 0        |
| SINE           | Alu            | B1_Mur3 | chr13 | 37867562 37867710 + | 0        | 0        | 0        |
| Simple_repeat  | Simple_repeat  | (A)n    | chr13 | 37867711 37867733 + | 0        | 0        | 0        |
| SINE           | Alu            | B1_Mus2 | chr13 | 38165439 38165586 + | 0        | 0        | 0        |
| Simple_repeat  | Simple_repeat  | (A)n    | chr13 | 38165587 38165616 + | 0        | 0        | 0        |
| Simple_repeat  | Simple_repeat  | (A)n    | chr13 | 38178197 38178227 + | 0        | 0        | 0        |
| Simple_repeat  | Simple_repeat  | (A)n    | chr13 | 39447365 39447418 + | 0        | 0        | 0        |
| Simple_repeat  | Simple_repeat  | (A)n    | chr13 | 39778342 39778370 + | 0        | 0        | 0        |
| LTR            | MaLR           | MTB     | chr13 | 39893579 39893977 - | 0        | 0        | 0        |
| Simple_repeat  | Simple_repeat  | (A)n    | chr13 | 40041626 40041652 + | 0        | 0        | 0        |
| Simple_repeat  | Simple_repeat  | (A)n    | chr13 | 40436088 40436123 + | 0        | 0        | 0        |
| LTR            | MaLR           | MTA_Mm  | chr13 | 40627378 40627771 - | 0        | 0        | 0        |
| Simple_repeat  | Simple_repeat  | (A)n    | chr13 | 40771528 40771560 + | 0        | 0        | 0        |
| SINE           | Alu            | B1_Mus1 | chr10 | 46989513 46989651 + | 0        | 0        | 0        |
| Low_complexity | Low_complexity | GA-rich | chr10 | 46989652 46989737 + | 0        | 0        | 0        |
| SINE           | Alu            | B1_Mus1 | chr13 | 40899383 40899523 - | 0        | 0        | 0        |
| SINE           | Alu            | B1_Mus2 | chr13 | 41073739 41073885 - | 0        | 0        | 0        |
| SINE           | Alu            | B1_Mus2 | chr13 | 41238278 41238415 + | 0        | 0        | 0        |
| Simple_repeat  | Simple_repeat  | (A)n    | chr13 | 41238416 41238439 + | 0        | 0        | 0        |
| SINE           | Alu            | B1_Mus2 | chr10 | 47076019 47076166 - | 0        | 0        | 0        |
| SINE           | Alu            | B1_Mus1 | chr10 | 47087340 47087486 - | 0        | 0        | 0        |
| Simple_repeat  | Simple_repeat  | (A)n    | chr10 | 47105411 47105430 + | 0        | 0        | 0        |
| LTR            | MaLR           | MTA_Mm  | chr13 | 42427750 42428138 + | 0        | 0        | 0        |
| Simple_repeat  | Simple_repeat  | (A)n    | chr13 | 42487162 42487208 + | 0        | 0        | 0        |
| Simple_repeat  | Simple_repeat  | (A)n    | chr13 | 42754315 42754363 + | 0        | 0        | 0        |
| LTR            | MaLR           | MTA_Mm  | chr13 | 42762425 42762819 + | 0        | 0        | 0        |
| Simple_repeat  | Simple_repeat  | (A)n    | chr13 | 44157084 44157135 + | 0        | 0        | 0        |
| Simple_repeat  | Simple_repeat  | (A)n    | chr13 | 44227824 44227865 + | 0.332194 | 0        | 0        |
| SINE           | Alu            | B1_Mm   | chr13 | 44467305 44467448 - | 0        | 0        | 0        |
| Simple_repeat  | Simple_repeat  | (A)n    | chr13 | 44579491 44579522 + | 0        | 0        | 0        |
| SINE           | Alu            | B1_Mm   | chr13 | 44596213 44596361 + | 0        | 0        | 0        |
| Simple_repeat  | Simple_repeat  | (A)n    | chr13 | 44596362 44596446 + | 0        | 0        | 0        |
| SINE           | Alu            | B1_Mus2 | chr13 | 44640990 44641135 - | 0        | 0        | 0        |
| LTR            | MaLR           | MTA_Mm  | chr13 | 44669765 44670160 - | 0        | 0        | 0        |
| SINE           | Alu            | B1_Mus1 | chr13 | 44710800 44710946 - | 0        | 0        | 0        |
| Simple_repeat  | Simple_repeat  | (A)n    | chr13 | 44746982 44747018 + | 0        | 0        | 0        |
| Simple_repeat  | Simple_repeat  | (A)n    | chr10 | 47511353 47511384 + | 0        | 0        | 0        |
| Simple_repeat  | Simple_repeat  | (A)n    | chr10 | 47517039 47517065 + | 0        | 0        | 0        |
| Simple_repeat  | Simple_repeat  | (A)n    | chr13 | 45115589 45115617 + | 0        | 0.708814 | 0        |
| Simple_repeat  | Simple_repeat  | (A)n    | chr10 | 47672008 47672069 + | 0        | 0        | 0        |
| Simple_repeat  | Simple_repeat  | (A)n    | chr10 | 47778583 47778637 + | 0        | 0        | 0        |
| SINE           | Alu            | B1_Mus2 | chr13 | 47561767 47561904 - | 0        | 0        | 0        |
| Simple_repeat  | Simple_repeat  | (A)n    | chr13 | 47993440 47993493 + | 0        | 0.708814 | 0.957947 |
| SINE           | Alu            | B1_Mm   | chr13 | 48886106 48886252 + | 0        | 0        | 0        |
| SINE           | Alu            | B1_Mus2 | chr13 | 50147655 50147779 + | 0        | 0        | 0        |
| Low_complexity | Low_complexity | A-rich  | chr13 | 50147780 50147871 + | 0        | 0        | 0        |
| SINE           | Alu            | B1_Mus1 | chr13 | 50470512 50470658 + | 0        | 0        | 0        |
| Simple_repeat  | Simple_repeat  | (A)n    | chr13 | 50470659 50470723 + | 0        | 0        | 0        |
| SINE           | Alu            | B1_Mus1 | chr13 | 51000123 51000273 - | 0        | 0        | 0        |
| SINE           | Alu            | B1_Mm   | chr13 | 51162146 51162290 - | 0        | 0        | 0        |
| SINE           | Alu            | PB1D10  | chr13 | 51252538 51252637 - | 0.591053 | 0        | 0        |
| Simple_repeat  | Simple_repeat  | (A)n    | chr10 | 48380475 48380511 + | 0        | 0        | 0        |
| SINE           | Alu            | B1_Mm   | chr10 | 48418109 48418243 + | 0        | 0        | 0        |
| Simple_repeat  | Simple_repeat  | (A)n    | chr10 | 48418244 48418266 + | 0        | 0        | 0        |
| SINE           | Alu            | B1_Mus1 | chr13 | 52031096 52031242 - | 0        | 0        | 0        |
| Simple_repeat  | Simple_repeat  | (TTTA)n | chr13 | 52428439 52428474 + | 0        | 0        | 0        |
| SINE           | Alu            | B1_Mus2 | chr13 | 52462170 52462301 - | 0        | 0        | 0        |
| LTR            | MaLR           | MTB     | chr13 | 52589609 52590009 - | 0        | 0        | 0        |
| SINE           | Alu            | B1_Mus1 | chr13 | 52640744 52640890 - | 0        | 0        | 0        |
| Simple_repeat  | Simple_repeat  | (A)n    | chr13 | 53078076 53078115 + | 0        | 0        | 0        |
| Simple_repeat  | Simple_repeat  | (A)n    | chr13 | 53105107 53105145 + | 0        | 0        | 0        |
| SINE           | Alu            | B1_Mus2 | chr13 | 53172344 53172490 + | 0        | 0        | 0        |
| SINE           | Alu            | B1_Mm   | chr13 | 53198455 53198600 + | 0        | 0        | 0        |
| Simple_repeat  | Simple_repeat  | (A)n    | chr13 | 53198601 53198632 + | 0        | 0        | 0        |

|               |               |         |       |                     |          |          |          |
|---------------|---------------|---------|-------|---------------------|----------|----------|----------|
| SINE          | Alu           | B1_Mus2 | chr13 | 54553896 54554042 - | 0.923247 | 0.708814 | 1.30057  |
| SINE          | Alu           | B1_Mm   | chr13 | 54570805 54570951 + | 0        | 0        | 0.615324 |
| Simple_repeat | Simple_repeat | (A)n    | chr13 | 54570952 54570997 + | 0        | 0        | 0        |
| SINE          | Alu           | B1_Mus2 | chr13 | 54673779 54673925 + | 0        | 0        | 0        |
| Simple_repeat | Simple_repeat | (A)n    | chr13 | 54673926 54673961 + | 0        | 0        | 0        |
| LINE          | L1            | L1Md_F2 | chr10 | 48785219 48790547 + | 0        | 0        | 0        |
| SINE          | Alu           | B1_Mm   | chr13 | 54770762 54770909 + | 0        | 0        | 0        |
| SINE          | Alu           | B1_Mus2 | chr13 | 54773316 54773460 - | 0        | 0        | 0        |
| SINE          | Alu           | B1_Mm   | chr13 | 55274929 55275069 - | 0        | 0        | 0        |
| SINE          | Alu           | B1_Mus2 | chr13 | 55277071 55277216 + | 0        | 0        | 0        |
| Simple_repeat | Simple_repeat | (A)n    | chr13 | 55277217 55277243 + | 0        | 0        | 0        |
| Simple_repeat | Simple_repeat | (A)n    | chr13 | 55282446 55282469 + | 0        | 0        | 0.342623 |
| SINE          | Alu           | B1_Mus1 | chr13 | 55544392 55544533 - | 0        | 0        | 0        |
| SINE          | Alu           | B1_Mm   | chr13 | 55678232 55678377 + | 0        | 1.01984  | 0        |
| Simple_repeat | Simple_repeat | (A)n    | chr13 | 55678378 55678403 + | 0        | 1.01984  | 0        |
| SINE          | Alu           | PB1D10  | chr13 | 56347080 56347195 - | 0        | 0        | 0        |
| Simple_repeat | Simple_repeat | (A)n    | chr13 | 56438131 56438172 + | 0        | 0        | 0        |
| SINE          | Alu           | B1_Mus2 | chr13 | 56856130 56856276 - | 0        | 0        | 0        |
| SINE          | Alu           | B1_Mus2 | chr13 | 57235429 57235547 - | 0        | 0        | 0        |
| LTR           | MaLR          | MTA_Mm  | chr13 | 57461942 57462333 + | 0        | 0.380568 | 0        |
| SINE          | B2            | B2_Mm1t | chr13 | 58273325 58273516 + | 0        | 0        | 0        |
| SINE          | Alu           | B1_Mus1 | chr13 | 58716863 58717008 + | 0        | 0        | 0        |
| Simple_repeat | Simple_repeat | (A)n    | chr13 | 58717009 58717041 + | 0        | 0        | 0        |
| SINE          | Alu           | B1_Mus1 | chr13 | 59479206 59479353 - | 0        | 0        | 0        |
| Simple_repeat | Simple_repeat | (A)n    | chr13 | 59524902 59524935 + | 0        | 0        | 0        |
| LTR           | MaLR          | MTA_Mm  | chr13 | 59824610 59825005 - | 0        | 0        | 0        |
| LTR           | ERV1          | MER89   | chr13 | 60623834 60624307 + | 0        | 0        | 0        |
| SINE          | Alu           | B1_Mus1 | chr13 | 60691714 60691861 - | 0        | 0        | 0        |
| SINE          | Alu           | B1_Mus1 | chr13 | 61564169 61564313 - | 0        | 0        | 0        |
| LINE          | L1            | L1Md_F2 | chr13 | 61617493 61622559 + | 0        | 0        | 0        |
| SINE          | Alu           | B1_Mus2 | chr13 | 61815325 61815471 - | 0        | 0        | 0        |
| SINE          | Alu           | B1_Mm   | chr13 | 61850194 61850339 - | 0        | 0        | 0        |
| SINE          | Alu           | B1_Mus2 | chr13 | 61981422 61981567 + | 0        | 0        | 0        |
| SINE          | Alu           | B1_Mus2 | chr13 | 62073027 62073173 + | 0        | 0        | 0        |
| Simple_repeat | Simple_repeat | (A)n    | chr13 | 62073174 62073211 + | 0        | 0        | 0        |
| SINE          | Alu           | B1_Mus1 | chr13 | 62096694 62096831 - | 0        | 0        | 0        |
| SINE          | Alu           | B1_Mus2 | chr13 | 62196835 62196981 + | 0        | 0        | 0        |
| Simple_repeat | Simple_repeat | (A)n    | chr13 | 62196982 62197013 + | 0        | 0        | 0        |
| SINE          | Alu           | B1_Mm   | chr10 | 49734284 49734427 + | 0        | 0        | 0        |
| Simple_repeat | Simple_repeat | (A)n    | chr10 | 49734428 49734474 + | 0.591053 | 0        | 0        |
| SINE          | Alu           | B1_Mus2 | chr13 | 62593966 62594112 + | 0        | 0        | 0        |
| SINE          | Alu           | B1_Mm   | chr13 | 62615786 62615931 + | 0        | 0        | 0        |
| Simple_repeat | Simple_repeat | (A)n    | chr13 | 62615932 62615983 + | 0        | 0        | 0        |
| SINE          | Alu           | B1_Mm   | chr13 | 62737425 62737571 - | 0        | 0        | 1.23065  |
| SINE          | Alu           | B1_Mm   | chr13 | 62808719 62808864 + | 0        | 0        | 0        |
| Simple_repeat | Simple_repeat | (A)n    | chr13 | 62808865 62808889 + | 0        | 0        | 0        |
| SINE          | Alu           | B1_Mus2 | chr13 | 62835842 62835988 + | 0        | 0        | 0        |
| Simple_repeat | Simple_repeat | (A)n    | chr13 | 62835989 62836010 + | 0        | 0        | 0        |
| SINE          | Alu           | B1_Mus2 | chr13 | 63030794 63030939 - | 0        | 0        | 0        |
| SINE          | Alu           | B1_Mus2 | chr13 | 64389268 64389429 - | 0        | 0        | 0        |
| LTR           | MaLR          | MTA_Mm  | chr13 | 64832090 64832485 - | 0        | 0        | 0        |
| Simple_repeat | Simple_repeat | (A)n    | chr10 | 50060516 50060550 + | 0.591053 | 0        | 0        |
| SINE          | Alu           | B1_Mus2 | chr13 | 65221347 65221485 + | 0        | 0        | 0        |
| Simple_repeat | Simple_repeat | (A)n    | chr13 | 65221486 65221509 + | 0        | 0        | 0.615324 |
| LTR           | MaLR          | MTA_Mm  | chr13 | 65563228 65563622 - | 0        | 0        | 0        |
| SINE          | Alu           | B1_Mm   | chr13 | 65720724 65720869 - | 0        | 0        | 0        |
| SINE          | Alu           | B1_Mus2 | chr10 | 50160768 50160914 + | 0        | 0        | 0        |
| SINE          | Alu           | B1_Mus2 | chr13 | 66087117 66087263 + | 0        | 0        | 0.615324 |
| LTR           | MaLR          | MTA_Mm  | chr13 | 66581009 66581403 + | 0        | 0        | 0        |
| LTR           | MaLR          | MTA_Mm  | chr13 | 66712376 66712769 - | 0        | 0        | 0        |
| SINE          | Alu           | B1_Mus1 | chr13 | 67655089 67655235 + | 0        | 0        | 0        |
| Simple_repeat | Simple_repeat | (GAAA)n | chr13 | 67655236 67655313 + | 0        | 0        | 0        |
| SINE          | Alu           | B1_Mus2 | chr13 | 67715461 67715607 - | 0        | 0        | 0        |
| LTR           | MaLR          | MTB     | chr13 | 69359070 69359466 - | 0        | 0        | 0        |
| SINE          | B2            | B2_Mm2  | chr13 | 69623586 69623773 + | 0        | 0        | 0        |
| LTR           | MaLR          | MTA_Mm  | chr13 | 69943316 69943714 + | 0        | 0        | 0        |
| LTR           | MaLR          | MTB_Mm  | chr13 | 70141061 70141441 - | 0.332194 | 0        | 0        |

|               |               |            |       |                     |          |          |         |
|---------------|---------------|------------|-------|---------------------|----------|----------|---------|
| SINE          | Alu           | B1_Mus1    | chr13 | 70708555 70708702 + | 0        | 0        | 0       |
| Simple_repeat | Simple_repeat | (A)n       | chr13 | 70708703 70708746 + | 0        | 0        | 0       |
| LTR           | MaLR          | MTA_Mm     | chr13 | 71123828 71124222 + | 0        | 0        | 0       |
| SINE          | Alu           | B1_Mm      | chr13 | 71171973 71172119 + | 0        | 0        | 0       |
| Simple_repeat | Simple_repeat | (A)n       | chr13 | 71172120 71172143 + | 0.332194 | 0        | 0       |
| Simple_repeat | Simple_repeat | (A)n       | chr13 | 71413475 71413503 + | 0        | 0        | 0       |
| Simple_repeat | Simple_repeat | (A)n       | chr13 | 71635564 71635592 + | 0        | 0        | 0       |
| Simple_repeat | Simple_repeat | (A)n       | chr13 | 71806124 71806160 + | 0        | 0        | 0       |
| Simple_repeat | Simple_repeat | (A)n       | chr10 | 50747265 50747300 + | 0        | 0        | 0       |
| Simple_repeat | Simple_repeat | (A)n       | chr13 | 72431764 72431804 + | 0        | 0        | 0       |
| SINE          | Alu           | B1_Mm      | chr13 | 72592812 72592947 + | 0        | 0        | 0       |
| Simple_repeat | Simple_repeat | (A)n       | chr13 | 72592950 72592976 + | 0        | 0.380568 | 0       |
| LTR           | MaLR          | MTA_Mm     | chr13 | 72914149 72914544 - | 0        | 0        | 0       |
| SINE          | Alu           | B1_Mus2    | chr13 | 73053550 73053695 + | 0        | 0        | 0       |
| Simple_repeat | Simple_repeat | (A)n       | chr13 | 73168501 73168537 + | 0        | 0        | 0       |
| SINE          | Alu           | B1_Mus2    | chr13 | 73561803 73561949 - | 0        | 0        | 0       |
| Simple_repeat | Simple_repeat | (A)n       | chr13 | 74037466 74037504 + | 0        | 0        | 0       |
| LTR           | MaLR          | MTA_Mm     | chr13 | 74773048 74773442 + | 0        | 0        | 0       |
| Simple_repeat | Simple_repeat | (A)n       | chr13 | 75002148 75002180 + | 0.332194 | 0        | 0       |
| SINE          | B2            | B2_Mm1a    | chr13 | 75498002 75498193 + | 0        | 0        | 0       |
| LINE          | L1            | L1_Mus4    | chr13 | 75628623 75634697 + | 0        | 0        | 0       |
| SINE          | Alu           | B1_Mm      | chr10 | 51196566 51196700 - | 0        | 0        | 0       |
| SINE          | Alu           | B1_Mm      | chr13 | 76335597 76335743 + | 0        | 0        | 0       |
| Simple_repeat | Simple_repeat | (A)n       | chr13 | 76335744 76335768 + | 0        | 0        | 0       |
| LINE          | L1            | Lx2        | chr13 | 78377855 78383139 - | 0        | 0        | 0       |
| LINE          | L1            | L1Md_A     | chr13 | 78437960 78442838 + | 0        | 0        | 0       |
| LINE          | L1            | L1_Mus2    | chr13 | 78558013 78563950 + | 0        | 0        | 0       |
| Simple_repeat | Simple_repeat | (A)n       | chr13 | 78611711 78611760 + | 0        | 0        | 0       |
| SINE          | Alu           | B1_Mur2    | chr13 | 79398939 79399079 - | 0        | 0        | 0       |
| Simple_repeat | Simple_repeat | (A)n       | chr13 | 79631496 79631538 + | 0        | 0.380568 | 0       |
| SINE          | Alu           | B1_Mm      | chr13 | 79693013 79693159 + | 0        | 0        | 0       |
| Simple_repeat | Simple_repeat | (A)n       | chr13 | 79693160 79693183 + | 0        | 0        | 0       |
| Simple_repeat | Simple_repeat | (A)n       | chr13 | 79922006 79922032 + | 0        | 0        | 0       |
| LTR           | MaLR          | MTA_Mm     | chr13 | 79995709 79996103 + | 0        | 0        | 0       |
| Simple_repeat | Simple_repeat | (CAAAAA)n  | chr13 | 80532706 80532810 + | 0        | 0        | 0       |
| LTR           | MaLR          | MTA_Mm     | chr13 | 82293486 82293877 + | 0        | 0        | 0       |
| SINE          | B2            | B2_Mm1t    | chr13 | 83055656 83055847 + | 0        | 0        | 0       |
| Simple_repeat | Simple_repeat | (A)n       | chr13 | 83055848 83055882 + | 0.664388 | 0.380568 | 0       |
| SINE          | Alu           | B1_Mm      | chr13 | 83070981 83071127 - | 0        | 0        | 0       |
| Simple_repeat | Simple_repeat | (A)n       | chr13 | 83372778 83372806 + | 0        | 0        | 0       |
| Simple_repeat | Simple_repeat | (A)n       | chr13 | 83518060 83518104 + | 0        | 0        | 0       |
| LTR           | ERVK          | RMER19B    | chr13 | 83840303 83841215 - | 0.591053 | 0        | 0       |
| LINE          | L1            | L1Md_T     | chr13 | 84623034 84630285 - | 0        | 0        | 0       |
| Simple_repeat | Simple_repeat | (A)n       | chr13 | 85232746 85232780 + | 0        | 0        | 0       |
| SINE          | Alu           | B1_Mus1    | chr13 | 85289023 85289167 - | 0        | 0        | 0       |
| SINE          | Alu           | B1_Mur4    | chr13 | 85718064 85718210 + | 0        | 0        | 0       |
| Simple_repeat | Simple_repeat | (A)n       | chr13 | 85718211 85718238 + | 0        | 0        | 0       |
| SINE          | Alu           | B1_Mus2    | chr13 | 85892462 85892600 - | 0        | 0        | 0       |
| SINE          | Alu           | B1_Mm      | chr13 | 86103579 86103724 + | 0        | 0        | 0       |
| Simple_repeat | Simple_repeat | (A)n       | chr13 | 86103725 86103770 + | 0        | 0        | 0       |
| SINE          | Alu           | B1_Mus2    | chr13 | 86313869 86314013 - | 0        | 0        | 0       |
| LTR           | MaLR          | ORR1B2-int | chr13 | 86445516 86446832 + | 0        | 0        | 0       |
| SINE          | Alu           | B1_Mm      | chr13 | 86905562 86905708 - | 0        | 0        | 0       |
| SINE          | Alu           | B1_Mm      | chr13 | 87628756 87628896 + | 0        | 0        | 0       |
| Simple_repeat | Simple_repeat | (A)n       | chr13 | 87628897 87628934 + | 0        | 0        | 0       |
| Simple_repeat | Simple_repeat | (A)n       | chr13 | 87896976 87897022 + | 0        | 0        | 0       |
| LTR           | MaLR          | MTA_Mm     | chr13 | 87998283 87998677 - | 0        | 0        | 0       |
| SINE          | Alu           | B1_Mus2    | chr13 | 88224379 88224525 + | 0        | 0        | 0       |
| SINE          | Alu           | B1_Mus2    | chr13 | 88351362 88351508 + | 0        | 0        | 0       |
| Simple_repeat | Simple_repeat | (A)n       | chr13 | 88351509 88351589 + | 0        | 0        | 0       |
| Simple_repeat | Simple_repeat | (A)n       | chr13 | 88363431 88363457 + | 0        | 0        | 0       |
| SINE          | Alu           | B1_Mm      | chr13 | 88431079 88431225 + | 0        | 0        | 0       |
| LTR           | MaLR          | MTA_Mm     | chr13 | 88784776 88785170 - | 0        | 0        | 0       |
| Simple_repeat | Simple_repeat | (A)n       | chr10 | 52250094 52250134 + | 0.664388 | 0        | 1.02787 |
| Simple_repeat | Simple_repeat | (A)n       | chr13 | 90868424 90868458 + | 0        | 0        | 0       |
| LTR           | MaLR          | MTA_Mm     | chr13 | 90940306 90940704 - | 0        | 0        | 0       |
| SINE          | Alu           | B1_Mus1    | chr13 | 91535293 91535442 + | 0        | 0        | 0       |

|               |               |         |       |          |            |          |          |          |
|---------------|---------------|---------|-------|----------|------------|----------|----------|----------|
| Simple_repeat | Simple_repeat | (A)n    | chr13 | 91535443 | 91535469 + | 0        | 0        | 0        |
| SINE          | B2            | B2_Mm2  | chr13 | 91934904 | 91935096 - | 0        | 0        | 0        |
| Simple_repeat | Simple_repeat | (A)n    | chr13 | 92904032 | 92904072 + | 0        | 0        | 0        |
| SINE          | B2            | B2_Mm1a | chr13 | 93179717 | 93179908 + | 0        | 0        | 0        |
| Simple_repeat | Simple_repeat | (A)n    | chr13 | 93179909 | 93179942 + | 0.664388 | 0        | 0.342623 |
| SINE          | Alu           | B1_Mus2 | chr13 | 94007260 | 94007405 - | 0        | 0        | 0        |
| SINE          | Alu           | B1_Mus2 | chr13 | 94320870 | 94321015 + | 0        | 0        | 0.342623 |
| Simple_repeat | Simple_repeat | (A)n    | chr13 | 94321016 | 94321049 + | 0        | 0        | 0        |
| SINE          | Alu           | B1_Mus1 | chr13 | 94364208 | 94364354 + | 0        | 0        | 0        |
| Simple_repeat | Simple_repeat | (A)n    | chr13 | 94364355 | 94364390 + | 0        | 0.380568 | 0        |
| SINE          | Alu           | B1_Mus1 | chr13 | 95111699 | 95111844 + | 0        | 0        | 0        |
| Simple_repeat | Simple_repeat | (A)n    | chr13 | 95111845 | 95111883 + | 0        | 0        | 0        |
| Simple_repeat | Simple_repeat | (A)n    | chr13 | 96686650 | 96686688 + | 0        | 0        | 0        |
| LTR           | MaLR          | MTA_Mm  | chr13 | 96976470 | 96976865 - | 0        | 0        | 0        |
| LTR           | MaLR          | MTA_Mm  | chr13 | 97479721 | 97480106 - | 0        | 0        | 0        |
| SINE          | Alu           | B1_Mm   | chr13 | 97520114 | 97520251 - | 0        | 0        | 0        |
| LTR           | MaLR          | MTA_Mm  | chr13 | 97553052 | 97553433 - | 0        | 0        | 0        |
| SINE          | Alu           | B1_Mm   | chr13 | 98144829 | 98144974 - | 0        | 0        | 0        |
| SINE          | Alu           | B1_Mus2 | chr13 | 99046571 | 99046717 + | 0        | 0        | 0        |
| Simple_repeat | Simple_repeat | (A)n    | chr13 | 99046718 | 99046740 + | 0        | 0        | 0        |
| LTR           | MaLR          | MTA_Mm  | chr10 | 53174693 | 53175069 + | 0        | 0        | 0        |
| SINE          | Alu           | B1_Mus1 | chr13 | 99116714 | 99116869 + | 0        | 0        | 0        |
| SINE          | Alu           | B1_Mus1 | chr10 | 53178343 | 53178488 + | 0        | 0        | 0        |
| Simple_repeat | Simple_repeat | (A)n    | chr10 | 53178489 | 53178518 + | 0        | 0        | 0        |
| SINE          | Alu           | B1_Mus2 | chr13 | 99598967 | 99599114 + | 0        | 0        | 0        |
| Simple_repeat | Simple_repeat | (A)n    | chr13 | 99599115 | 99599143 + | 0        | 0        | 0        |
| SINE          | Alu           | B1_Mus2 | chr13 | 99699179 | 99699325 - | 0        | 0        | 0        |
| SINE          | Alu           | B1_Mm   | chr13 | 99750249 | 99750394 + | 0        | 0        | 0        |
| SINE          | Alu           | B1_Mus2 | chr13 | 10116095 | 10116109 - | 0        | 0        | 0        |
| Simple_repeat | Simple_repeat | (A)n    | chr13 | 10123716 | 10123719 + | 0        | 0        | 0        |
| SINE          | Alu           | B1_Mus2 | chr13 | 10161799 | 10161813 - | 0        | 0        | 0        |
| LTR           | MaLR          | MTA_Mm  | chr13 | 10163368 | 10163407 - | 0        | 0        | 0.342623 |
| LINE          | L1            | L1Md_F2 | chr10 | 53549275 | 53555455 - | 0        | 0        | 0        |
| LTR           | MaLR          | MTA_Mm  | chr13 | 10211032 | 10211071 + | 0        | 0        | 0        |
| SINE          | Alu           | B1_Mus1 | chr13 | 10423011 | 10423021 + | 0        | 0        | 0        |
| Simple_repeat | Simple_repeat | (A)n    | chr13 | 10423021 | 10423025 + | 0        | 0        | 0        |
| SINE          | Alu           | B1_Mm   | chr13 | 10423176 | 10423191 + | 0        | 0        | 0        |
| Simple_repeat | Simple_repeat | (A)n    | chr13 | 10423191 | 10423196 + | 0        | 0        | 0        |
| SINE          | Alu           | B1_Mus2 | chr13 | 10480008 | 10480023 - | 0        | 0        | 0        |
| SINE          | Alu           | B1_Mus1 | chr10 | 7822651  | 7822780 +  | 0        | 0        | 0        |
| Simple_repeat | Simple_repeat | (A)n    | chr13 | 10608937 | 10608942 + | 0        | 0        | 0        |
| Simple_repeat | Simple_repeat | (A)n    | chr13 | 10651802 | 10651805 + | 0        | 0        | 0        |
| LTR           | MaLR          | MTA_Mm  | chr13 | 10727185 | 10727224 - | 0        | 0        | 0        |
| LTR           | MaLR          | MTA_Mm  | chr13 | 10729853 | 10729892 - | 0        | 0        | 0        |
| SINE          | Alu           | B1_Mm   | chr13 | 10787496 | 10787510 - | 0        | 0        | 0        |
| SINE          | Alu           | B1_Mus1 | chr13 | 10827701 | 10827716 + | 0        | 0        | 0        |
| Simple_repeat | Simple_repeat | (A)n    | chr13 | 10827716 | 10827723 + | 0        | 0        | 0        |
| Simple_repeat | Simple_repeat | (A)n    | chr13 | 10829685 | 10829690 + | 0        | 0        | 0        |
| LINE          | L1            | L1Md_T  | chr13 | 10929342 | 10930007 - | 0        | 0        | 0        |
| SINE          | Alu           | PB1D7   | chr10 | 54360832 | 54360953 - | 0        | 0.708814 | 0        |
| SINE          | Alu           | B1_Mus2 | chr10 | 54470339 | 54470487 + | 0        | 0        | 0        |
| Simple_repeat | Simple_repeat | (A)n    | chr13 | 11109186 | 11109190 + | 0        | 0        | 0        |
| Simple_repeat | Simple_repeat | (A)n    | chr13 | 11132979 | 11132983 + | 0        | 0        | 0.342623 |
| Simple_repeat | Simple_repeat | (A)n    | chr10 | 54558813 | 54558842 + | 0        | 0        | 0        |
| LTR           | MaLR          | MTB     | chr13 | 11160828 | 11160868 - | 0        | 0        | 0        |
| Simple_repeat | Simple_repeat | (A)n    | chr13 | 11215978 | 11215980 + | 0        | 0        | 0        |
| LTR           | MaLR          | MTA_Mm  | chr13 | 11219905 | 11219945 + | 0        | 0        | 0        |
| SINE          | Alu           | B1_Mm   | chr13 | 11228450 | 11228464 + | 0        | 0        | 0        |
| Simple_repeat | Simple_repeat | (A)n    | chr13 | 11228464 | 11228467 + | 0        | 0        | 0        |
| LTR           | MaLR          | MTA_Mm  | chr13 | 11230415 | 11230454 + | 0        | 0        | 0        |
| LTR           | MaLR          | MTA_Mm  | chr13 | 11230564 | 11230604 + | 1.18211  | 0        | 0        |
| Simple_repeat | Simple_repeat | (A)n    | chr13 | 11231660 | 11231666 + | 0        | 0        | 0        |
| SINE          | Alu           | B1_Mm   | chr13 | 11232909 | 11232924 + | 0        | 0        | 0.342623 |
| Simple_repeat | Simple_repeat | (A)n    | chr13 | 11232924 | 11232926 + | 0        | 0        | 0.342623 |
| SINE          | Alu           | B1_Mus2 | chr13 | 11252844 | 11252858 + | 0        | 0        | 0.342623 |
| Simple_repeat | Simple_repeat | (A)n    | chr13 | 11252858 | 11252860 + | 0.332194 | 0        | 0        |
| Simple_repeat | Simple_repeat | (A)n    | chr13 | 11284881 | 11284885 + | 0        | 0        | 0        |

|                |                |         |       |                     |          |          |          |
|----------------|----------------|---------|-------|---------------------|----------|----------|----------|
| Simple_repeat  | Simple_repeat  | (A)n    | chr13 | 11289059 11289062 + | 0        | 0        | 0        |
| LTR            | MaLR           | MTB     | chr13 | 11307347 11307387 + | 0        | 0        | 0        |
| Simple_repeat  | Simple_repeat  | (A)n    | chr13 | 11321759 11321764 + | 0        | 0.380568 | 0        |
| LTR            | MaLR           | MTA_Mm  | chr13 | 11414840 11414880 + | 0        | 0        | 0        |
| LTR            | MaLR           | MTA_Mm  | chr13 | 11423443 11423483 + | 0        | 0        | 0        |
| LTR            | MaLR           | MTA_Mm  | chr13 | 11430184 11430223 + | 0        | 0        | 0        |
| Simple_repeat  | Simple_repeat  | (A)n    | chr13 | 11457805 11457807 + | 0        | 0        | 0        |
| SINE           | B2             | B3      | chr13 | 11523869 11523888 - | 0        | 0        | 0        |
| LTR            | MaLR           | MTB     | chr13 | 11526604 11526644 + | 0        | 0        | 0        |
| LTR            | MaLR           | MTA_Mm  | chr10 | 55147670 55148064 - | 0        | 0        | 0        |
| Simple_repeat  | Simple_repeat  | (A)n    | chr13 | 11679166 11679170 + | 0.591053 | 0.380568 | 0.957947 |
| LTR            | MaLR           | MTA_Mm  | chr13 | 11759153 11759193 - | 0        | 0        | 0        |
| LTR            | MaLR           | MTA_Mm  | chr13 | 11925603 11925642 - | 0        | 0        | 0        |
| LINE           | L1             | L1Md_F2 | chr13 | 11978540 11979067 + | 0        | 0        | 0        |
| Simple_repeat  | Simple_repeat  | (A)n    | chr14 | 3019467 3019492 +   | 0        | 0        | 0        |
| SINE           | Alu            | B1_Mus1 | chr14 | 4271863 4272009 -   | 0        | 0        | 0        |
| Simple_repeat  | Simple_repeat  | (A)n    | chr14 | 5223751 5223776 +   | 0        | 0        | 0        |
| Simple_repeat  | Simple_repeat  | (A)n    | chr14 | 5360784 5360819 +   | 0        | 0        | 0.342623 |
| SINE           | Alu            | B1_Mus1 | chr14 | 5402442 5402589 +   | 0        | 0        | 0        |
| Low_complexity | Low_complexity | A-rich  | chr14 | 5402590 5402639 +   | 0        | 0        | 0        |
| Simple_repeat  | Simple_repeat  | (A)n    | chr14 | 6408820 6408845 +   | 0        | 0        | 0        |
| Simple_repeat  | Simple_repeat  | (A)n    | chr14 | 6545857 6545890 +   | 0        | 0        | 0.342623 |
| SINE           | Alu            | B1_Mus1 | chr14 | 6587705 6587852 +   | 0        | 0        | 0        |
| Low_complexity | Low_complexity | A-rich  | chr14 | 6587853 6587903 +   | 0        | 0        | 0.342623 |
| Simple_repeat  | Simple_repeat  | (A)n    | chr14 | 7165543 7165613 +   | 0        | 0        | 0        |
| SINE           | B2             | B2_Mm1a | chr14 | 8516825 8517021 +   | 0        | 0        | 0        |
| SINE           | Alu            | B1_Mm   | chr10 | 56003776 56003921 + | 0        | 0        | 0        |
| SINE           | Alu            | B1_Mus2 | chr14 | 8594154 8594300 -   | 0        | 0        | 0        |
| LTR            | MaLR           | MTA_Mm  | chr14 | 8599962 8600343 -   | 0        | 0        | 0        |
| LTR            | MaLR           | MTA_Mm  | chr14 | 8646969 8647364 +   | 0        | 0        | 0        |
| SINE           | Alu            | B1_Mm   | chr14 | 9021558 9021703 +   | 0        | 0        | 0        |
| Simple_repeat  | Simple_repeat  | (A)n    | chr14 | 9021704 9021758 +   | 0        | 0        | 0        |
| LTR            | MaLR           | MTA_Mm  | chr14 | 9850607 9851000 +   | 0        | 0        | 0        |
| LTR            | MaLR           | MTA_Mm  | chr14 | 9852100 9852493 +   | 0        | 0        | 0.342623 |
| SINE           | Alu            | B1_Mus2 | chr10 | 56113910 56114056 - | 0        | 0        | 0        |
| SINE           | Alu            | B1_Mus2 | chr10 | 56145755 56145908 + | 0        | 0        | 0        |
| Simple_repeat  | Simple_repeat  | (A)n    | chr10 | 56145909 56145936 + | 0        | 0        | 0        |
| SINE           | Alu            | B1_Mur2 | chr10 | 56193647 56193784 - | 0        | 0        | 0        |
| SINE           | Alu            | B1_Mm   | chr14 | 12125289 12125435 + | 0        | 0        | 0        |
| Simple_repeat  | Simple_repeat  | (A)n    | chr14 | 12125436 12125461 + | 0        | 0        | 0        |
| SINE           | Alu            | B1_Mm   | chr10 | 56267522 56267668 + | 0        | 0        | 0        |
| Simple_repeat  | Simple_repeat  | (A)n    | chr10 | 56267669 56267694 + | 0        | 0        | 0        |
| LTR            | MaLR           | MTA_Mm  | chr14 | 13143360 13143751 - | 0.591053 | 0        | 0        |
| Simple_repeat  | Simple_repeat  | (A)n    | chr10 | 56300529 56300585 + | 0        | 0        | 0        |
| LINE           | L1             | L1Md_F2 | chr10 | 56338075 56344228 - | 0        | 0        | 0        |
| Simple_repeat  | Simple_repeat  | (A)n    | chr14 | 14485581 14485607 + | 0        | 0        | 0        |
| SINE           | Alu            | B1_Mus1 | chr14 | 14732433 14732576 + | 0        | 0        | 0        |
| Simple_repeat  | Simple_repeat  | (A)n    | chr14 | 14732577 14732609 + | 0        | 0        | 0        |
| SINE           | Alu            | B1_Mm   | chr14 | 14827144 14827289 - | 0        | 0        | 0        |
| LINE           | L1             | L1_Mus1 | chr14 | 15087175 15091630 - | 0        | 0.380568 | 0        |
| LINE           | L1             | L1_Mus2 | chr14 | 15188554 15193433 + | 0        | 0        | 0        |
| LINE           | L1             | L1_Mus2 | chr14 | 15417219 15423484 - | 0        | 0.708814 | 0        |
| Simple_repeat  | Simple_repeat  | (A)n    | chr14 | 15508711 15508739 + | 0        | 0        | 0.615324 |
| LTR            | MaLR           | MTA_Mm  | chr14 | 15647598 15647992 + | 0        | 0        | 0        |
| Simple_repeat  | Simple_repeat  | (A)n    | chr14 | 15897940 15897986 + | 0        | 0        | 0        |
| SINE           | Alu            | B1_Mus1 | chr14 | 16030748 16030895 + | 0        | 0        | 0        |
| Simple_repeat  | Simple_repeat  | (A)n    | chr14 | 16030896 16030943 + | 0        | 0        | 0        |
| LINE           | L1             | L1_Mus3 | chr14 | 16108848 16113632 + | 0        | 0        | 0        |
| LINE           | L1             | L1_Mus1 | chr14 | 17183355 17187733 - | 0        | 0        | 0        |
| LTR            | MaLR           | MTA_Mm  | chr14 | 17969965 17970351 - | 0.591053 | 0.708814 | 0        |
| Simple_repeat  | Simple_repeat  | (A)n    | chr14 | 18221184 18221221 + | 0        | 0        | 0        |
| LTR            | MaLR           | MTA_Mm  | chr14 | 18415648 18416040 - | 0.591053 | 0        | 0.615324 |
| LTR            | MaLR           | MTA_Mm  | chr14 | 18486297 18486696 + | 0        | 0        | 0        |
| Simple_repeat  | Simple_repeat  | (A)n    | chr10 | 56759332 56759366 + | 0.591053 | 0        | 0        |
| SINE           | Alu            | B1_Mus2 | chr14 | 19097662 19097800 + | 0        | 0        | 0        |
| Simple_repeat  | Simple_repeat  | (A)n    | chr14 | 19097801 19097848 + | 0        | 0        | 0        |
| SINE           | Alu            | B1_Mm   | chr14 | 20023156 20023292 + | 0        | 0        | 0        |



|               |               |         |       |                     |          |          |          |
|---------------|---------------|---------|-------|---------------------|----------|----------|----------|
| Simple_repeat | Simple_repeat | (A)n    | chr14 | 20023293 20023320 + | 0        | 0        | 0        |
| LTR           | MaLR          | MTA_Mm  | chr14 | 20053001 20053395 - | 0        | 0        | 0        |
| Simple_repeat | Simple_repeat | (A)n    | chr14 | 20305130 20305184 + | 0        | 0        | 0        |
| SINE          | Alu           | B1_Mus1 | chr14 | 20685450 20685603 + | 0        | 0        | 0        |
| Simple_repeat | Simple_repeat | (A)n    | chr14 | 20685604 20685627 + | 0        | 0        | 0        |
| SINE          | Alu           | B1_Mus1 | chr14 | 20844841 20844962 + | 0        | 0        | 0        |
| Simple_repeat | Simple_repeat | (GAAA)n | chr14 | 20844963 20845013 + | 0        | 0        | 0        |
| Simple_repeat | Simple_repeat | (A)n    | chr14 | 20931794 20931824 + | 0        | 0        | 0        |
| SINE          | Alu           | B1_Mm   | chr14 | 20955724 20955860 + | 0        | 0        | 0        |
| Simple_repeat | Simple_repeat | (A)n    | chr14 | 20955861 20955883 + | 0        | 0        | 0        |
| Simple_repeat | Simple_repeat | (A)n    | chr14 | 21300380 21300409 + | 0        | 0        | 0        |
| Simple_repeat | Simple_repeat | (A)n    | chr14 | 21450957 21451005 + | 0        | 0        | 0        |
| SINE          | Alu           | B1_Mus1 | chr14 | 21688914 21689060 - | 0.591053 | 0        | 0        |
| Simple_repeat | Simple_repeat | (A)n    | chr14 | 21713466 21713492 + | 0        | 0        | 0        |
| SINE          | B2            | B2_Mm1a | chr14 | 21715851 21716043 + | 0        | 0        | 0        |
| Simple_repeat | Simple_repeat | (A)n    | chr14 | 21716044 21716069 + | 1.38382  | 0.708814 | 0.685246 |
| LTR           | MaLR          | MTA_Mm  | chr14 | 23995720 23996113 + | 0        | 0        | 0        |
| SINE          | Alu           | B1_Mm   | chr14 | 26952216 26952361 - | 0        | 0        | 0        |
| SINE          | Alu           | B1_Mus2 | chr14 | 26952950 26953096 + | 0        | 0        | 0        |
| Simple_repeat | Simple_repeat | (A)n    | chr14 | 26953097 26953120 + | 0        | 0.380568 | 0        |
| SINE          | Alu           | B1_Mm   | chr14 | 27091865 27092010 - | 0        | 0        | 0        |
| SINE          | Alu           | B1_Mus2 | chr14 | 27092599 27092745 + | 0        | 0        | 0        |
| Simple_repeat | Simple_repeat | (A)n    | chr14 | 27092746 27092769 + | 0        | 0        | 0        |
| SINE          | Alu           | B1_Mus1 | chr10 | 57774628 57774775 - | 0        | 0        | 0        |
| SINE          | Alu           | B1_Mus2 | chr14 | 28223983 28224129 + | 0        | 0.708814 | 0        |
| Simple_repeat | Simple_repeat | (A)n    | chr14 | 28224130 28224158 + | 0        | 0.708814 | 0        |
| LTR           | MaLR          | MTA_Mm  | chr14 | 28363619 28364014 - | 0.591053 | 0        | 0        |
| SINE          | Alu           | B1_Mus2 | chr14 | 28401938 28402082 - | 0        | 0        | 0        |
| Simple_repeat | Simple_repeat | (A)n    | chr14 | 29610337 29610441 + | 0        | 0        | 0        |
| SINE          | Alu           | B1_Mus2 | chr14 | 30745642 30745783 + | 0        | 0        | 0        |
| Simple_repeat | Simple_repeat | (A)n    | chr14 | 30745784 30745828 + | 0        | 0        | 0        |
| SINE          | Alu           | B1_Mus1 | chr14 | 30775571 30775716 - | 0        | 0        | 0        |
| SINE          | Alu           | B1_Mus2 | chr14 | 31936139 31936284 - | 0        | 0        | 0        |
| LTR           | MaLR          | MTB     | chr10 | 58181127 58181525 + | 0        | 0        | 0        |
| LTR           | MaLR          | MTA_Mm  | chr14 | 32143313 32143708 - | 0.332194 | 0        | 0        |
| LTR           | MaLR          | MTA_Mm  | chr14 | 32398327 32398725 + | 0        | 0        | 0        |
| Simple_repeat | Simple_repeat | (A)n    | chr14 | 32496883 32496912 + | 0        | 0        | 0        |
| SINE          | Alu           | B1_Mus1 | chr14 | 32648480 32648623 - | 0        | 0        | 0        |
| SINE          | Alu           | B1_Mus2 | chr14 | 32935988 32936134 + | 0        | 0        | 0        |
| Simple_repeat | Simple_repeat | (A)n    | chr14 | 32936135 32936157 + | 0        | 0        | 0        |
| SINE          | Alu           | B1_Mm   | chr14 | 33555429 33555576 + | 0        | 0        | 0        |
| Simple_repeat | Simple_repeat | (A)n    | chr14 | 33555577 33555670 + | 0.332194 | 0        | 0        |
| Simple_repeat | Simple_repeat | (A)n    | chr14 | 34184460 34184495 + | 0        | 0        | 0        |
| Simple_repeat | Simple_repeat | (A)n    | chr14 | 34296510 34296538 + | 0        | 0        | 0.342623 |
| Simple_repeat | Simple_repeat | (A)n    | chr14 | 34563721 34563759 + | 0        | 0        | 0        |
| LTR           | MaLR          | MTB     | chr14 | 34671328 34671725 - | 0        | 0        | 0        |
| Simple_repeat | Simple_repeat | (A)n    | chr14 | 34765411 34765445 + | 0        | 0        | 0        |
| SINE          | Alu           | B1_Mus2 | chr14 | 35484377 35484526 + | 0        | 0        | 0        |
| Simple_repeat | Simple_repeat | (A)n    | chr14 | 35484527 35484570 + | 0        | 0        | 0        |
| LINE          | L1            | L1_Mus2 | chr14 | 37040240 37040608 - | 0        | 0        | 0        |
| LINE          | L1            | L1Md_F2 | chr14 | 37052070 37058253 - | 0        | 0        | 0        |
| Simple_repeat | Simple_repeat | (A)n    | chr14 | 37100296 37100324 + | 0        | 0        | 0        |
| SINE          | Alu           | B1_Mus2 | chr14 | 37389033 37389179 - | 0        | 0        | 0        |
| Simple_repeat | Simple_repeat | (A)n    | chr14 | 38074507 38074555 + | 0        | 0        | 0        |
| LTR           | MaLR          | MTA_Mm  | chr14 | 38271599 38271994 - | 0.332194 | 0        | 0        |
| Simple_repeat | Simple_repeat | (A)n    | chr14 | 38300956 38300999 + | 0        | 0        | 0.342623 |
| Simple_repeat | Simple_repeat | (A)n    | chr14 | 38323203 38323240 + | 0        | 0        | 0        |
| SINE          | Alu           | B1_Mus2 | chr14 | 38938544 38938659 - | 0        | 0        | 0        |
| LINE          | L1            | L1Md_F2 | chr14 | 40529522 40535385 - | 0        | 0        | 0        |
| SINE          | Alu           | B1_Mus2 | chr14 | 40783900 40784045 - | 0        | 0        | 0        |
| SINE          | Alu           | B1_Mm   | chr14 | 41186299 41186450 + | 0        | 0        | 0        |
| SINE          | Alu           | B1_Mus2 | chr14 | 42329045 42329190 - | 0        | 0        | 0        |

Supplementary Table S4: Predicted repeat targets based on piRNA cleavage signature in addition to their class; family; subfamily; genomic coordinates and normalized CAGE expression throughout postnatal development in brain
